# Supplementary material for: Disease-related mutations in PI3Kγ disrupt regulatory C-terminal dynamics and reveal a path to selective inhibitors
Source: eLife. 2021 Mar 4;10:e64691. doi: 10.7554/eLife.64691 (PMC7955810; doi:10.7554/eLife.64691)
Supplement: Figure 1—source data 1. — For every HDX figure, there is one source data file with two pieces of data. In the first tab, the charge state (Z), residue start (S), maximum deuterium incorporation (Max D), residue end number (E), and retention time (RT) are displayed for every peptide. Data listed is the mean of 3 independent experiments, with SDs presented. Time points are labelled, and the relative level % deuterium incorporation is coloured according to the legend. Peptides with significant changes in % D between conditions are highlighted according to the legend. The second tab contains the HDExaminer output data which displays the S, E, Z, Max D, RT, #D incorporation, %D incorporation, and confidence score for every peptide in each time point and condition. [file elife-64691-fig1-data1.xlsx]

## Sheet: Figure_1_Assays_SpActivities
Fig 1D. p110/p101 activities on PM (corrected for ATPase activity)									p-values
WT Basal	WT w/ Gbg	WT w/ Ras	R1021C Basal	R1021C w/ Gbg	R1021C w/ Ras	R1021P Basal	R1021P w/ Gbg		WT Basal v R1021C Basal	0.000731694
-1.135	77.775	8.185	5.33	387.69	21.94	-3.99667	6.31333		WT w/ Gbg v R1021C w/ Gbg	0.0250243
0.765	112.185	7.065	10.37	1014.48	25.39	6.27333	8.09333		WT w/ Ras v R1021C w/ Ras	0.00568294
1.235	88.495	12.665	9.86	824.02	30.82	3.38333	15.8433		WT Basal v R1021P Basal	0.487166
0.695							7.76333		WT w/ Gbg v R1021P w/ Gbg	1.76789e-05
-0.695							6.74333
							24.1533
Fig 1E. p110/p101 ATPase activities				p-values
WT	R1021C	R1021P		WT v R1021C	0.55019
1.8	1.95	11.53		WT v R1021P	0.00157535
3.28	2.19	21.87
2.93	3.15	21.19
2.05	3.06	10.92
	3.63	11.19
	2.7	22.46
Fig 1D. p110 activites on PM (corrected for ATPase activity)					p-value
WT Basal (N.D.)	WT w/ Gbg	R1021C Basal	R1021C w/ Gbg		WT w/ Gbg v R1021C w/ Gbg	0.000522419
-6.64	29.5375	21.1875	175.357
-6.68	24.8675	25.8775	150.057
-7.6	23.1775	46.5875	132.977
