# Supplementary material for: Disease-related mutations in PI3Kγ disrupt regulatory C-terminal dynamics and reveal a path to selective inhibitors
Source: eLife. 2021 Mar 4;10:e64691. doi: 10.7554/eLife.64691 (PMC7955810; doi:10.7554/eLife.64691)
Supplement: Figure 2—figure supplement 1—source data 1. [file elife-64691-fig2-figsupp1-data1.xlsx]

## Sheet: Fig 2-Fig supplement 1 mut HDX
p110g						APO									R1021C												APO vs R1021C													Peptide coverage map
S	E	Max D	RT	Z	Sequence	3s	SD	30s	SD	300s	SD	3000s	SD		3s	SD	30s	SD	300s	SD	3000s	SD					3s	SD	30s	SD	300s	SD	3000s	SD
3	12	7	9.515	1	LENYKQPVVL	76.189	0.626903	74.9617	0.410125	73.527	0.231931	77.0685	1.66524		73.6983	0.603527	75.4113	0.968669	74.5635	0.461741	77.6163	0.414505		Average % Deuterium incorporation	100		2.49067	1.23043	-0.449667	1.37879	-1.0365	0.693672	-0.547833	2.07974		Increase in exchange	5-10%
6	12	4	8.82	1	YKQPVVL	86.63	0.621087	87.6097	0.742594	87.2945	0.232638	86.58	1.29401		86.385	0.46679	88.0777	0.815357	87.5525	0.39103	88.3083	0.582612			90		0.245	1.08788	-0.468	1.55795	-0.258	0.623668	-1.72833	1.87662			10-20%
36	41	3	10.735	1	ELIPIE	1.594	0.165973	2.58867	0.298185	8.963	0.280014	18.395	0.8358		0.947	0.356459	1.92967	0.232307	9.366	0.138593	18.65	0.271177			80		0.647	0.522432	0.659	0.530492	-0.403	0.418607	-0.255	1.10698			>20%
36	42	4	14	1	ELIPIEF	1.62067	0.343191	3.01933	0.884395	8.381	0.560029	14.0225	0.58902		2.51633	0.218715	3.177	0.45303	8.6425	0.262337	15.604	0.423671			70		-0.895667	0.561907	-0.157667	1.33742	-0.2615	0.822365	-1.5815	1.01269		No change	-5-5%
42	58	13	8.41	2	FVLPTSQRKCKSPETAL	28.724	0.485225	37.3373	0.793872	42.2055	0.16617	47.802	0.994192		29.3253	0.50527	36.9903	0.874318	42.7665	0.484368	48.117	0.165012			60		-0.601333	0.990494	0.347	1.66819	-0.561	0.650538	-0.315	1.1592		Decrease in exchange	5-10%
42	59	14	9.515	2	FVLPTSQRKCKSPETALL	22.737	0.424363	29.8733	0.501025	34.6045	0.0374767	40.1345	1.09531		22.9693	0.148136	29.8133	0.553064	35.1745	0.453255	40.261	0.143816			50		-0.232333	0.572499	0.06	1.05409	-0.57	0.490732	-0.1265	1.23912			10-20%
43	59	13	8.075	2	VLPTSQRKCKSPETALL	29.6067	0.4345	38.907	0.890808	43.625	0.159806	46.229	1.07622		30.2647	0.389975	38.5483	1.14964	43.9025	0.645588	46.339	0.33466			40		-0.658	0.824475	0.358667	2.04045	-0.2775	0.805395	-0.11	1.41088			>20%
59	69	9	5.065	2	LHVAGHGNVEQ	8.46033	0.30665	16.819	0.429567	25.6615	0.181726	42.9665	0.357089		8.352	0.277955	16.7383	0.751161	23.8355	0.215668	41.761	0.650774			30		0.108333	0.584605	0.0806667	1.18073	1.826	0.397394	1.2055	1.00786
59	70	10	6.69	2	LHVAGHGNVEQM	6.10933	0.434568	12.5433	0.0727622	18.6195	0.272236	32.8635	1.23249		7.335	0.33659	12.6673	0.55703	19.1425	0.480126	31.9303	0.485071			20		-1.22567	0.771158	-0.124	0.629792	-0.523	0.752362	0.933167	1.71756		Highlighted peptides also cross thresholds of change >0.4 Da and p value <0.01
59	74	14	6.775	2	LHVAGHGNVEQMKAQV	3.52167	0.263608	7.392	0.352719	11.603	0.154149	27.8885	1.18158		3.85433	0.157367	7.38833	0.399101	11.629	0.340825	27.0737	0.606943			10		-0.332667	0.420975	0.00366667	0.75182	-0.026	0.494975	0.814833	1.78852
60	69	8	3.705	2	HVAGHGNVEQ	8.484	0.436302	19.1793	0.0189297	29.0285	0.610233	45.675	1.01682		8.91733	0.847514	19.3537	0.547476	27.464	0.487904	42.6237	0.702405					-0.433333	1.28382	-0.174333	0.566406	1.5645	1.09814	3.05133	1.71922
60	70	9	5.33	1	HVAGHGNVEQM	6.13967	0.393961	13.4577	0.46765	22.61	0.046669	36.0735	0.655488		6.829	0.676501	13.7427	0.992555	21.1515	0.236881	34.7653	1.6704					-0.689333	1.07046	-0.285	1.46021	1.4585	0.28355	1.30817	2.32589
71	76	4	10.745	1	KAQVWL	0.978333	0.0433167	1.21567	0.155545	1.8045	0.00777817	6.1315	0.7064		1.01833	0.151929	1.25567	0.190962	1.613	0.0127279	6.66933	0.226694					-0.04	0.195245	-0.04	0.346507	0.1915	0.0205061	-0.537833	0.933094
77	84	6	6.225	2	RALETSVA	34.924	0.541407	50.0703	0.296095	58.847	0.605283	71.549	0.535987		36.2443	0.47074	49.685	0.906538	59.989	0.414365	72.0833	0.733815					-1.32033	1.01215	0.385333	1.20263	-1.142	1.01965	-0.534333	1.2698		All highlighted cells represent peptides that are mapped on the p110 structure
79	84	4	6.32	1	LETSVA	51.034	0.718413	72.0527	1.03195	79.537	0.776403	78.9485	1.12925		53.3217	0.645271	73.1033	0.386231	79.3445	0.7064	80.0093	0.409339					-2.28767	1.36368	-1.05067	1.41818	0.1925	1.4828	-1.06083	1.53859
79	86	6	6.2	1	LETSVAAD	56.0077	0.402424	71.9563	1.2805	77.27	0.388909	73.5565	1.92404		57.961	0.185292	73.2233	0.272773	76.399	0.616597	77.7697	0.120351					-1.95333	0.587716	-1.267	1.55327	0.871	1.00551	-4.21317	2.04439
87	99	10	10.27	4	FYHRLGPHHFLLL	2.666	0.0471275	5.89833	0.235912	7.194	0.0975807	11.5015	0.529623		2.90867	0.193053	5.83933	0.118509	7.2215	0.0558614	11.4697	0.0861646					-0.242667	0.24018	0.059	0.35442	-0.0275	0.153442	0.0318333	0.615788
88	98	8	8.635	4	YHRLGPHHFLL	3.823	0.260914	8.793	0.214147	10.5575	0.253851	15.824	0.581242		4.017	0.0471487	8.81433	0.22185	10.848	0.246073	15.386	0.126693					-0.194	0.308062	-0.0213333	0.435997	-0.2905	0.499924	0.438	0.707934
88	99	9	10.055	4	YHRLGPHHFLLL	3.352	0.210587	6.95633	0.12566	8.6065	0.0756604	13.7315	0.908632		3.372	0.0491223	7.10667	0.142917	8.9265	0.0572756	13.774	0.110177					-0.02	0.25971	-0.150333	0.268577	-0.32	0.132936	-0.0425	1.01881
100	106	5	6.085	1	YQKKGQW	30.57	0.667991	51.715	0.453798	57.1045	0.0883883	58.7845	0.645588		31.3133	0.580634	51.2777	0.748553	57.412	0.89944	59.9853	0.345494					-0.743333	1.24863	0.437333	1.20235	-0.3075	0.987828	-1.20083	0.991083
107	113	5	9.055	1	YEIYDKY	24.016	0.138488	41.2893	1.35519	52.996	0.0226274	55.2485	1.04864		25.3253	0.58406	40.721	0.795676	53.199	0.374767	55.3933	0.527493					-1.30933	0.722548	0.568333	2.15087	-0.203	0.397394	-0.144833	1.57613
107	118	10	9.41	2	YEIYDKYQVVQT	11.1847	0.16527	20.1343	0.459506	33.957	0.258801	50.653	0.776403		12.06	0.275153	19.8803	0.297577	32.778	0.640639	51.6803	0.585246					-0.875333	0.440423	0.254	0.757083	1.179	0.89944	-1.02733	1.36165
107	119	11	10.805	2	YEIYDKYQVVQTL	10.646	0.266051	17.9353	0.310877	30.064	0.463862	47.027	2.16658		11.0613	0.138276	18.189	0.299531	30.4555	0.0685894	48.9767	1.13642					-0.415333	0.404327	-0.253667	0.610408	-0.3915	0.532451	-1.94967	3.303
122	137	13	7.605	4	LRYWKATHRSPGQIHL	3.22033	0.254861	9.11133	0.68859	15.747	0.36911	23.183	0.88954		3.858	0.131195	8.95633	0.381634	16.146	0.110309	22.4067	0.225615					-0.637667	0.386056	0.155	1.07022	-0.399	0.479418	0.776333	1.11516
122	149	23	6.43	5	LRYWKATHRSPGQIHLVQRHPPSEESQA	8.589	0.403129	16.2183	0.711173	22.9855	0.751655	26.616	0.210718		8.888	0.282836	15.8337	0.278312	22.95	0.731148	26.662	0.258093					-0.299	0.685965	0.384667	0.989484	0.0355	1.4828	-0.046	0.468811
125	137	10	6.91	3	WKATHRSPGQIHL	5.30133	0.398047	14.062	0.624505	16.912	0.649124	20.9085	0.184555		5.77833	0.329482	11.9877	0.620111	16.6335	0.111016	20.4647	0.300237					-0.477	0.727529	2.07433	1.24462	0.2785	0.76014	0.443833	0.484792
138	149	8	4.155	2	VQRHPPSEESQA	37.8237	0.680914	50.685	0.68377	61.965	0.00141421	62.7335	0.540937		37.505	0.347357	49.8253	1.05726	60.4665	0.49851	62.0063	2.34806					0.318667	1.02827	0.859667	1.74103	1.4985	0.499924	0.727167	2.88899
146	157	10	10.255	2	ESQAFQRQLTAL	2.993	0.243859	12.3097	0.874683	29.411	0.325269	45.739	0.995606		3.29367	0.111912	11.4427	0.487888	29.54	0.394566	45.4977	1.03432					-0.300667	0.355771	0.867	1.36257	-0.129	0.719835	0.241333	2.02992
150	157	6	9.105	1	FQRQLTAL	2.12433	0.243992	5.24767	0.498454	19.0455	0.946816	36.8305	0.951059		2.02767	0.117738	4.62933	0.170758	16.728	0.0692965	34.536	0.128515					0.0966667	0.361731	0.618333	0.669212	2.3175	1.01611	2.2945	1.07957
151	157	5	8.09	2	QRQLTAL	2.33567	0.221127	6.286	0.8525	19.94	0.470933	37.074	0.821658		2.424	0.347461	5.90867	0.0979047	19.6495	0.928431	34.799	0.0052915					-0.0883333	0.568588	0.377333	0.950405	0.2905	1.39936	2.275	0.82695
158	164	5	8.34	1	IGYDVTD	12.5603	0.446096	19.1243	0.364651	41.266	0.561443	58.5955	0.17607		12.9467	0.146118	19.2853	0.502571	42.284	0.670337	58.0017	0.729762					-0.386333	0.592213	-0.161	0.867222	-1.018	1.23178	0.593833	0.905831
158	172	13	8.82	2	IGYDVTDVSNVHDDE	23.5793	0.372501	30.1103	0.821796	39.6105	0.918532	46.8185	0.144957		24.9253	0.555352	30.6967	0.518201	40.2455	0.598919	45.9847	1.05314					-1.346	0.927854	-0.586333	1.34	-0.635	1.51745	0.833833	1.1981
158	173	14	10.375	2	IGYDVTDVSNVHDDEL	20.1967	0.543347	29.478	0.924372	40.828	1.14693	46.217	0.595384		21.887	0.475993	30.9103	0.580526	39.45	1.12854	46.0197	1.2408					-1.69033	1.01934	-1.43233	1.5049	1.378	2.27547	0.197333	1.83618
158	174	15	9.99	2	IGYDVTDVSNVHDDELE	19.2337	0.424077	28.137	0.720806	37.1315	0.968029	44.8285	0.239709		20.7653	0.511391	28.974	0.695047	38.7795	0.567807	45.0487	1.17404					-1.53167	0.935468	-0.837	1.41585	-1.648	1.53584	-0.220167	1.41375
161	172	10	6.575	2	DVTDVSNVHDDE	29.8107	0.478774	40.7803	0.24966	47.8585	0.757311	53.8045	0.95813		30.786	0.588042	39.056	0.793756	47.447	0.639225	53.4333	0.941134					-0.975333	1.06682	1.72433	1.04342	0.4115	1.39654	0.371167	1.89926
161	174	12	8.455	2	DVTDVSNVHDDELE	22.3643	0.455935	33.4163	0.731799	41.0285	0.173241	49.2895	0.0869741		23.8	0.482709	33.846	0.670553	42.022	0.483661	48.334	0.333042					-1.43567	0.938644	-0.429667	1.40235	-0.9935	0.656902	0.9555	0.420016
161	175	13	11.425	2	DVTDVSNVHDDELEF	19.0733	0.443561	28.2633	0.522039	35.506	0.453963	40.8495	0.235467		20.4387	0.320058	29.0333	0.691151	35.662	0.0254558	42.778	0.802723					-1.36533	0.763619	-0.77	1.21319	-0.156	0.479418	-1.9285	1.03819
165	174	8	6.685	1	VSNVHDDELE	13.658	0.669614	29.5397	1.09664	35.929	0.784889	40.1955	0.550836		15.719	0.265915	29.6497	0.770979	37.7845	1.56483	40.4477	0.705354					-2.061	0.935529	-0.11	1.86762	-1.8555	2.34972	-0.252167	1.25619
174	182	7	7.005	1	EFTRRGLVT	2.58833	0.283729	3.91933	0.79964	9.4575	0.294864	14.615	0.366281		2.98167	0.4362	4.043	0.224348	9.7775	0.130815	15.0357	0.183045					-0.393333	0.719929	-0.123667	1.02399	-0.32	0.425678	-0.420667	0.549326
174	182	7	7.095	2	EFTRRGLVT	2.63467	0.312572	3.84133	0.476943	9.615	0.0947523	14.8875	0.116673		2.98767	0.268504	3.831	0.0972471	9.744	0.424264	15.204	0.232355					-0.353	0.581076	0.0103333	0.57419	-0.129	0.519016	-0.3165	0.349028
174	187	11	7.72	2	EFTRRGLVTPRMAE	2.26467	0.208618	3.36167	0.390833	8.2555	0.0318198	18.145	0.675994		2.56367	0.598786	3.14167	0.176046	7.6605	0.0869741	17.3347	0.500979					-0.299	0.807403	0.22	0.566879	0.595	0.118794	0.810333	1.17697
174	195	18	8.31	5	EFTRRGLVTPRMAEVASRDPKL	5.43167	0.339197	9.48733	0.546752	18.814	1.02106	28.9465	0.989242		5.549	0.138849	9.57333	0.310189	17.366	0.489318	28.5913	0.394579					-0.117333	0.478045	-0.086	0.856941	1.448	1.51038	0.355167	1.38382
175	182	6	6.21	1	FTRRGLVT	2.82267	0.315081	4.603	0.716689	11.4115	0.297692	17.0425	0.106773		3.12267	0.524504	5.12233	0.535288	11.6035	0.405172	17.5843	0.384111					-0.3	0.839585	-0.519333	1.25198	-0.192	0.702864	-0.541833	0.490884
176	182	5	4.925	2	TRRGLVT	3.24433	0.202362	5.02967	0.775274	13.544	0.670337	20.884	0.282843		3.354	0.228061	4.899	0.310363	12.9115	0.0671751	20.9077	0.488533					-0.109667	0.430423	0.130667	1.08564	0.6325	0.737512	-0.0236667	0.771376
176	185	7	6.66	2	TRRGLVTPRM	2.58467	0.106613	3.875	0.356437	11.1285	0.942573	15.269	0.304056		3.086	0.860986	4.21667	0.168049	10.355	1.26289	15.0283	0.23584					-0.501333	0.967599	-0.341667	0.524485	0.7735	2.20547	0.240667	0.539896
176	185	7	6.66	3	TRRGLVTPRM	2.48367	0.3405	3.734	0.44323	9.7545	0.190212	15.013	0.421436		2.94133	0.438847	3.69667	0.312798	9.3745	0.147785	15.4283	0.525404					-0.457667	0.779347	0.0373333	0.756028	0.38	0.337997	-0.415333	0.94684
176	195	16	7.575	4	TRRGLVTPRMAEVASRDPKL	6.41067	0.16579	10.8347	0.499482	20.9925	0.557907	32.38	0.767918		6.38933	0.25552	10.842	0.209921	20.065	0.388909	32.4537	0.953464					0.0213333	0.42131	-0.00733333	0.709403	0.9275	0.946816	-0.0736667	1.72138
186	195	7	6.085	2	AEVASRDPKL	14.461	0.416846	24.4473	0.304162	40.6955	0.249609	56.173	0.205061		14.5903	0.303668	24.0507	0.386526	38.0435	0.475883	53.9343	0.248878					-0.129333	0.720515	0.396667	0.690688	2.652	0.725492	2.23867	0.453939
188	195	5	5.34	2	VASRDPKL	20.532	0.322782	33.2337	0.18509	48.617	0.304056	59.0475	0.0742462		20.5713	0.163659	33.0123	0.339201	46.057	0.912168	57.3677	0.936075					-0.0393333	0.486441	0.221333	0.524291	2.56	1.21622	1.67983	1.01032
196	211	11	11.785	2	YAMHPWVTSKPLPEYL	24.645	0.211171	34.2777	0.42098	45.2905	0.215668	53.1595	0.583363		25.0317	0.308106	34.7023	0.360612	45.4605	0.178898	52.015	0.848498					-0.386667	0.519277	-0.424667	0.781593	-0.17	0.394566	1.1445	1.43186
196	211	11	11.865	3	YAMHPWVTSKPLPEYL	24.587	0.214544	34.2103	0.2265	45.173	0.200818	52.589	0.473762		24.998	0.218687	34.4923	0.50033	45.2885	0.299106	52.6	0.349039					-0.411	0.433231	-0.282	0.72683	-0.1155	0.499924	-0.011	0.8228
212	218	5	5.065	1	WKKIANN	44.2797	1.09265	60.3963	1.39629	73.6345	0.103945	73.129	1.35765		43.9193	0.598028	61.641	0.740461	72.947	1.29966	74.405	1.04673					0.360333	1.69068	-1.24467	2.13675	0.6875	1.40361	-1.276	2.40438
212	221	8	10.465	1	WKKIANNCIF	20.0107	0.234556	34.4147	0.527126	51.345	0.485075	56.783	0.527502		19.8483	0.276815	34.59	0.801955	51.6205	0.218496	55.8427	0.485013					0.162333	0.51137	-0.175333	1.32908	-0.2755	0.703571	0.940333	1.01251
222	232	9	4.73	2	IVIHRSTTSQT	31.1157	0.847441	33.0293	0.198404	35.883	0.354968	40.64	0.705693		31.007	0.258598	33.3947	0.161463	35.6095	0.200111	40.76	1.11823					0.108667	1.10604	-0.365333	0.359868	0.2735	0.555079	-0.12	1.82392
222	245	20	9.16	4	IVIHRSTTSQTIKVSPDDTPGAIL	10.635	0.192876	14.938	0.28872	19.5135	0.477297	24.97	0.555786		11.1333	0.236766	15.223	0.301511	19.994	0.304056	25.2907	0.543767					-0.498333	0.429642	-0.285	0.590231	-0.4805	0.781353	-0.320667	1.09955
223	233	9	4.725	3	VIHRSTTSQTI	31.3177	0.471187	33.0807	0.451071	36.2485	0.28355	40.9215	0.791252		31.2233	0.397488	33.7563	0.348721	36.015	0.263044	40.8803	1.26097					0.0943333	0.868675	-0.675667	0.799792	0.2335	0.546594	0.0411667	2.05222
232	245	10	10.12	2	TIKVSPDDTPGAIL	11.8497	0.2984	19.6887	0.222109	27.9545	0.0318198	37.1775	1.04298		11.8023	0.19505	19.9147	0.18742	28.532	0.442649	37.3707	0.218196					0.0473333	0.493449	-0.226	0.409529	-0.5775	0.474469	-0.193167	1.26118
233	245	9	10.08	1	IKVSPDDTPGAIL	9.55	0.21998	12.7243	0.43755	21.6345	0.0968736	31.2965	0.808223		9.39533	0.240238	12.585	0.301209	21.789	0.10748	31.654	0.240502					0.154667	0.460218	0.139333	0.73876	-0.1545	0.204354	-0.3575	1.04872
233	245	9	10.085	2	IKVSPDDTPGAIL	9.63433	0.262553	13.2377	0.219983	22.3075	0.178898	31.9045	0.566393		9.85433	0.278909	12.9583	0.188022	22.195	0.374767	31.831	0.331935					-0.22	0.541463	0.279333	0.408005	0.1125	0.553665	0.0735	0.898328
248	269	19	8.185	3	FFTKMAKKKSLMDIPESQSEQD	42.7763	0.601479	46.8203	0.949635	46.0205	0.518309	47.6435	0.986414		43.106	0.383728	46.5823	0.91116	46.8235	0.101116	46.7413	0.311372					-0.329667	0.985207	0.238	1.86079	-0.803	0.619426	0.902167	1.29779
249	269	18	7.415	3	FTKMAKKKSLMDIPESQSEQD	48.0417	0.795893	52.6733	0.945535	51.985	1.07197	52.566	0.0452548		48.5357	0.823629	52.0683	1.39002	53.0455	0.236881	52.2213	0.418909					-0.494	1.61952	0.605	2.33555	-1.0605	1.30885	0.344667	0.464163
249	269	18	7.32	4	FTKMAKKKSLMDIPESQSEQD	49.0707	0.746202	53.0337	1.062	52.8425	1.0048	54.316	1.05642		49.264	0.782612	52.99	1.30375	53.656	0.0579828	52.7183	0.91156					-0.193333	1.52881	0.0436667	2.36575	-0.8135	1.06278	1.59767	1.96798
270	278	7	8.95	3	FVLRVCGRD	3.245	0.25343	4.704	0.512432	9.873	0.156978	14.6475	0.484368		4.80433	0.33427	6.34233	0.349893	11.3825	0.712057	15.768	0.0723809					-1.55933	0.5877	-1.63833	0.862326	-1.5095	0.869034	-1.1205	0.556749
270	281	10	11.155	3	FVLRVCGRDEYL	1.888	0.295615	2.77633	0.235228	6.1225	0.426385	8.931	0.0141421		2.727	0.0874014	3.68933	0.156273	6.8585	0.11243	9.432	0.257342					-0.839	0.383016	-0.913	0.391502	-0.736	0.538815	-0.501	0.271484
282	291	7	8.12	1	VGETPIKNFQ	8.75367	0.0702163	9.14067	0.536364	9.84	0.111723	17.1075	0.21991		8.92133	0.115284	9.393	0.149813	9.908	0.0890955	17.8163	0.460071					-0.167667	0.1855	-0.252333	0.686177	-0.068	0.200818	-0.708833	0.679981
282	307	23	11.23	4	VGETPIKNFQWVRHCLKNGEEIHVVL	4.18867	0.356287	13.2903	0.415857	17.076	0.0381838	19.386	0.100409		4.44233	0.100759	13.1017	0.187705	17.4795	0.191626	19.6223	0.042336					-0.253667	0.457046	0.188667	0.603563	-0.4035	0.22981	-0.236333	0.142745
292	302	9	5.495	2	WVRHCLKNGEE	5.95933	0.192256	20.3513	0.372178	22.747	0.588313	23.695	0.173948		6.37767	0.237908	19.5387	0.414828	22.6925	0.651245	24.4347	0.604008					-0.418333	0.430164	0.812667	0.787006	0.0545	1.23956	-0.739667	0.777956
292	307	14	8.755	4	WVRHCLKNGEEIHVVL	4.256	0.518588	14.9573	0.59242	20.046	0.34224	20.978	0.828729		4.56967	0.060302	15.15	0.64533	20.5345	0.4278	21.7423	0.605693					-0.313667	0.57889	-0.192667	1.23775	-0.4885	0.770039	-0.764333	1.43442
308	315	3	8.445	1	DTPPDPAL	17.186	0.813475	43.639	0.363154	55.024	0.0933381	65.67	0.777817		17.6963	0.575245	43.7383	0.627771	54.308	0.304056	65.4873	1.01846					-0.510333	1.38872	-0.0993333	0.990925	0.716	0.397394	0.182667	1.79628
308	317	5	7.885	1	DTPPDPALDE	11.648	0.87337	25.0257	1.03566	36.802	0.420021	52.184	0.43982		12.7137	0.555244	26.2957	0.759332	38.5035	0.631446	52.1667	1.1278					-1.06567	1.42861	-1.27	1.79499	-1.7015	1.05147	0.0173333	1.56762
316	335	17	12.615	2	DEVRKEEWPLVDDCTGVTGY	38.7703	0.574785	43.1797	0.805591	47.907	0.909339	52.9065	0.478711		38.7427	0.469713	42.7773	0.916605	47.0925	0.125158	52.5503	0.32505					0.0276667	1.0445	0.402333	1.7222	0.8145	1.0345	0.356167	0.803761
316	335	17	12.585	3	DEVRKEEWPLVDDCTGVTGY	39.1487	0.135596	43.6013	0.79166	48.425	0.709935	53.265	0.319612		38.905	0.427821	43.174	0.963228	47.3405	0.292035	52.8083	0.426709					0.243667	0.563417	0.427333	1.75489	1.0845	1.00197	0.456667	0.746321
316	339	21	11.945	2	DEVRKEEWPLVDDCTGVTGYHEQL	38.8447	0.354791	42.711	0.922403	46.4665	0.406586	50.735	0.455377		38.391	0.198756	42.1723	1.09319	46.011	0.217789	50.3247	0.233179					0.453667	0.553547	0.538667	2.01559	0.4555	0.624375	0.410333	0.688556
317	335	16	12.345	3	EVRKEEWPLVDDCTGVTGY	36.4897	0.333068	40.366	0.617913	45.5875	0.557907	49.9285	0.505581		35.4643	0.297651	40.01	1.35102	44.7895	0.586192	50.2087	0.368831					1.02533	0.630719	0.356	1.96894	0.798	1.1441	-0.280167	0.874412
328	339	10	8.905	1	DCTGVTGYHEQL	56.7397	0.17094	58.7997	1.05767	59.0655	0.505581	61.622	1.00833		57.228	1.13017	57.5613	0.602288	58.9855	0.118087	59.9487	0.864535					-0.488333	1.30111	1.23833	1.65996	0.08	0.623668	1.67333	1.87287
336	350	13	7.585	2	HEQLTIHGKDHESVF	31.2593	0.453527	33.296	0.685407	33.1025	0.52538	32.976	0.113137		32.483	0.648373	33.0017	1.4283	33.735	0.13435	33.467	0.461995					-1.22367	1.1019	0.294333	2.11371	-0.6325	0.659731	-0.491	0.575132
336	350	13	7.565	3	HEQLTIHGKDHESVF	31.4343	0.422782	33.5547	0.78111	33.3155	0.385373	33.8845	0.385373		32.453	0.637002	33.2523	1.41605	33.947	0.0565685	33.6753	0.401453					-1.01867	1.05978	0.302333	2.19716	-0.6315	0.441942	0.209167	0.786826
340	350	9	6.795	2	TIHGKDHESVF	23.8867	0.535985	25.442	0.816421	25.266	0.733977	26.0815	0.433456		24.2863	0.518969	25.09	0.739515	25.592	0.797616	25.4623	0.302913					-0.399667	1.05495	0.352	1.55594	-0.326	1.53159	0.619167	0.73637
355	379	21	10.63	5	WDCDRKFRVKIRGIDIPVLPRNTDL	12.793	0.096286	17.6123	0.306009	22.149	0.0961665	28.0625	0.915703		12.4487	0.0900074	17.6407	0.28006	22.813	0.0254558	28.812	0.178681					0.344333	0.186293	-0.0283333	0.586068	-0.664	0.121622	-0.7495	1.09438
362	379	14	9.91	4	RVKIRGIDIPVLPRNTDL	19.6277	0.204857	25.4707	0.224714	31.5675	0.39103	37.9035	1.15753		19.648	0.18784	25.6927	0.287611	32.061	0.255973	38.3753	0.0181475					-0.0203333	0.392697	-0.222	0.512325	-0.4935	0.647003	-0.471833	1.17568
370	379	7	9.585	2	IPVLPRNTDL	49.8817	1.39256	62.1667	0.488661	70.6365	0.801152	73.219	0.345068		50.528	0.465146	62.14	0.694876	71.3155	0.330219	72.0747	0.26842					-0.646333	1.85771	0.0266667	1.18354	-0.679	1.13137	1.14433	0.613488
370	381	9	10.235	2	IPVLPRNTDLTV	35.2943	0.690942	48.642	0.692078	60.604	0.639225	62.195	0.100409		35.422	0.412215	48.1837	0.266519	60.7515	0.28355	61.639	0.598425					-0.127667	1.10316	0.458333	0.958597	-0.1475	0.922774	0.556	0.698835
382	394	11	9.235	2	FVEANIQHGQQVL	8.922	0.155396	16.2907	0.446	18.597	0.178191	27.0335	0.511238		8.563	0.181876	15.8853	0.302573	18.9225	0.00777817	26.794	0.320899					0.359	0.337273	0.405333	0.748573	-0.3255	0.185969	0.2395	0.832137
383	394	10	7.95	2	VEANIQHGQQVL	10.4453	0.364935	20.6507	0.551402	23.313	0.192333	32.75	0.154149		10.4563	0.341851	19.8247	0.452339	23.5695	0.0841457	32.1183	0.11185					-0.011	0.706786	0.826	1.00374	-0.2565	0.276479	0.631667	0.265999
386	394	7	7.405	1	NIQHGQQVL	13.8987	0.343729	28.1167	0.151216	31.549	0.244659	44.978	0.337997		13.949	0.538794	27.139	0.730587	32.298	0.0127279	43.2383	0.650641					-0.0503333	0.882523	0.977667	0.881803	-0.749	0.257387	1.73967	0.988638
395	407	9	5.66	2	CQRRTSPKPFTEE	10.6637	0.36405	19.2343	0.501231	29.3995	0.053033	35.301	0.205061		10.7567	0.132005	19.45	0.551272	29.0085	0.779939	35.916	0.734474					-0.093	0.496055	-0.215667	1.0525	0.391	0.832972	-0.615	0.939535
395	407	9	5.665	3	CQRRTSPKPFTEE	10.4827	0.318422	19.0993	0.387843	29.0235	0.212839	35.2985	0.1393		10.6807	0.272517	19.2873	0.519042	29.2025	0.743169	35.915	0.673771					-0.198	0.590938	-0.188	0.906885	-0.179	0.956008	-0.6165	0.813071
417	428	9	8.26	3	SIKIKDLPKGAL	2.721	0.188072	8.554	0.80077	18.975	0.25173	32.6465	0.573464		5.68133	0.0112398	15.6753	0.448634	29.241	0.130108	41.6573	0.0361156					-2.96033	0.199312	-7.12133	1.2494	-10.266	0.381838	-9.01083	0.609579
417	431	12	10.625	3	SIKIKDLPKGALLNL	2.01267	0.334869	6.14	0.508944	12.608	0.463862	21.6025	0.600334		4.157	0.107392	10.6153	0.15879	19.398	0.0735391	27.575	0.0811911					-2.14433	0.442261	-4.47533	0.667734	-6.79	0.537401	-5.9725	0.681525
461	466	4	12.225	1	LYYVNL	1.46967	0.382513	1.71367	0.642519	2.041	0.89944	2.8575	1.29188		0.941333	0.419386	1.03033	0.263732	0.725	0.0608112	1.734	0.20203					0.528333	0.801899	0.683333	0.90625	1.316	0.960251	1.1235	1.49391
463	468	4	13.51	1	YVNLLL	1.574	0.761162	2.191	0.202635	10.4245	0.829436	22.091	0.657609		1.20667	0.257586	2.63233	0.527433	9.5085	0.361332	23.1753	0.968902					0.367333	1.01875	-0.441333	0.730068	0.916	1.19077	-1.08433	1.62651
466	474	7	12.05	3	LLLIDHRFL	1.23733	0.284268	3.757	0.210815	9.839	0.43982	14.021	0.64771		1.438	0.352233	5.11867	0.230717	12.735	0.0155563	20.2117	0.45244					-0.200667	0.636501	-1.36167	0.441532	-2.896	0.455377	-6.19067	1.10015
467	475	7	12.1	3	LLIDHRFLL	0.802667	0.11644	3.45033	0.210315	9.6725	0.221324	13.8905	1.16036		1.10933	0.33436	5.23167	0.570716	12.7495	0.00212132	19.5953	0.191513					-0.306667	0.4508	-1.78133	0.78103	-3.077	0.223446	-5.70483	1.35188
467	479	11	9.155	4	LLIDHRFLLRRGE	4.12067	0.254052	13.3557	0.547217	19.2675	0.331633	23.321	0.950352		5.121	0.13309	14.5217	0.244193	21.833	0.625082	27.9913	0.335071					-1.00033	0.387142	-1.166	0.79141	-2.5655	0.956715	-4.67033	1.28542
467	480	12	9.615	4	LLIDHRFLLRRGEY	3.72767	0.0834286	11.651	0.299531	17.113	0.0367696	20.532	0.694379		4.66133	0.028006	12.8313	0.324526	19.168	0.592555	24.7453	0.0895842					-0.933667	0.111435	-1.18033	0.624058	-2.055	0.629325	-4.21333	0.783963
468	480	11	8.575	2	LIDHRFLLRRGEY	4.70133	0.480219	14.1653	0.668515	19.9615	0.342947	23.97	0.250316		5.501	0.2389	15.541	0.34211	21.9255	0.412243	27.9223	0.175169					-0.799667	0.719119	-1.37567	1.01062	-1.964	0.75519	-3.95233	0.425485
485	497	11	9.875	2	WQISGKGEDQGSF	55.1133	0.347765	56.7127	0.810681	61.9965	0.65266	59.094	1.57261		56.134	0.0805419	57.4097	0.842836	62.452	0.287085	63.2013	0.70993					-1.02067	0.428307	-0.697	1.65352	-0.4555	0.939745	-4.10733	2.28254
498	513	13	5.24	2	NADKLTSATNPDKENS	17.9927	0.476456	29.9073	0.841005	39.784	0.304056	55.3855	0.666802		21.1203	0.448614	34.8003	0.838899	49.56	0.94328	67.11	1.0506					-3.12767	0.92507	-4.893	1.6799	-9.776	1.24734	-11.7245	1.7174
498	515	15	6.125	3	NADKLTSATNPDKENSMS	14.7343	0.387758	27.3673	0.53758	35.978	0.694379	49.406	0.838629		17.5397	0.230752	29.53	0.280551	43.577	1.01399	58.741	0.24627					-2.80533	0.61851	-2.16267	0.818131	-7.599	1.70837	-9.335	1.0849
500	515	13	5.96	2	DKLTSATNPDKENSMS	16.7143	0.103394	29.371	0.871196	37.03	0.250316	52.8105	0.465983		17.718	0.425508	29.4553	0.265493	46.677	0.10748	63.371	0.522925					-1.00367	0.528902	-0.0843333	1.13669	-9.647	0.357796	-10.5605	0.988909
514	519	4	12.57	1	MSISIL	1.812	0.366692	1.84	0.547178	1.291	0.125865	1.501	0.223446		1.47667	0.386188	1.43567	1.15504	0.956	0.500632	1.226	0.316					0.335333	0.75288	0.404333	1.70221	0.335	0.626497	0.275	0.539446
520	529	7	10.765	2	LDNYCHPIAL	32.5427	0.983798	49.3577	0.756199	54.095	0.0169706	55.8575	0.753069		40.141	0.58505	52.549	0.294444	55.338	0.239002	56.0303	0.565074					-7.59833	1.56885	-3.19133	1.05064	-1.243	0.255973	-0.172833	1.31814
520	551	24	9.075	4	LDNYCHPIALPKHQPTPDPEGDRVRAEMPNQL	43.1983	0.275146	50.2193	0.462265	51.181	0.165463	52.485	0.0707107		46.8497	0.794618	51.293	0.485816	51.8905	0.755897	51.733	0.078					-3.65133	1.06976	-1.07367	0.948081	-0.7095	0.92136	0.752	0.148711
520	556	29	8.65	5	LDNYCHPIALPKHQPTPDPEGDRVRAEMPNQLRKQLE	38.862	0.751178	50.2273	0.448315	53.7155	0.344361	54.918	0.186676		46.8687	0.816549	53.8607	0.761509	54.692	0.461034	54.1973	0.172923					-8.00667	1.56773	-3.63333	1.20982	-0.9765	0.805395	0.720667	0.359599
523	551	21	8.56	5	YCHPIALPKHQPTPDPEGDRVRAEMPNQL	44.786	0.27726	51.458	0.850522	51.958	0.0381838	53.662	0.121622		48.278	0.99794	52.4167	0.622897	52.584	0.292742	52.4247	0.184069					-3.492	1.2752	-0.958667	1.47342	-0.626	0.330926	1.23733	0.305691
557	573	13	10.875	2	AIIATDPLNPLTAEDKE	27.773	0.893282	46.9223	1.05189	62.2165	0.324562	66.5825	0.258094		44.943	0.517719	61.3407	0.669467	65.6525	0.142128	65.8853	0.292057					-17.17	1.411	-14.4183	1.72136	-3.436	0.46669	0.697167	0.550151
557	578	18	13.83	3	AIIATDPLNPLTAEDKELLWHF	12.7483	0.683635	37.8653	0.300317	58.0115	0.423557	64.4865	0.0940452		36.8667	1.06008	56.0287	0.51587	62.593	0.0212132	64.1567	0.413993					-24.1183	1.74372	-18.1633	0.816188	-4.5815	0.44477	0.329833	0.508038
557	580	20	12.945	4	AIIATDPLNPLTAEDKELLWHFRY	11.437	0.119512	40.2323	0.817945	58.2275	0.243952	66.8295	1.06278		36.0237	0.941504	55.4803	0.521234	61.911	1.01541	65.618	0.17565					-24.5867	1.06102	-15.248	1.33918	-3.6835	1.25936	1.2115	1.23843
558	569	8	11.63	1	IIATDPLNPLTA	35.38	0.975188	60.4253	1.08676	74.587	0.92631	76.1975	0.177484		55.7543	1.02413	73.3213	0.42466	75.2205	0.412243	75.1207	0.553607					-20.3743	1.99932	-12.896	1.51142	-0.6335	1.33855	1.07683	0.73109
558	570	9	11.575	1	IIATDPLNPLTAE	33.1347	0.733516	56.159	1.0069	69.152	0.511945	70.1025	0.00353553		51.3713	0.261217	68.551	0.802727	68.865	1.09319	69.7223	0.465129					-18.2367	0.994733	-12.392	1.80963	0.287	1.60513	0.380167	0.468665
558	571	10	11.555	1	IIATDPLNPLTAED	30.5023	1.12125	51.1923	0.827576	64.4465	0.809637	64.1685	0.0784889		48.915	1.11402	62.1067	1.19502	65.4515	0.00353553	65.719	0.479188					-18.4127	2.23527	-10.9143	2.0226	-1.005	0.813173	-1.5505	0.557677
558	573	12	10.55	2	IIATDPLNPLTAEDKE	26.1307	1.00491	48.626	0.666594	62.8765	0.555079	65.044	0.485075		45.912	0.519431	60.4363	0.924797	64.082	0.616597	64.8537	0.61268					-19.7813	1.52434	-11.8103	1.59139	-1.2055	1.17168	0.190333	1.09776
558	578	17	13.86	3	IIATDPLNPLTAEDKELLWHF	19.75	0.649952	36.9113	0.766621	53.978	0.834386	59.8735	0.659731		34.356	1.00743	51.3533	0.449891	57.019	0.538815	59.255	0.467002					-14.606	1.65738	-14.442	1.21651	-3.041	1.3732	0.6185	1.12673
574	578	3	13.19	1	LLWHF	8.149	0.931491	25.384	0.813282	45.0605	0.287792	51.5745	1.29754		23.4617	0.928235	42.378	0.939203	48.301	1.55281	51.2573	0.509639					-15.3127	1.85973	-16.994	1.75249	-3.2405	1.8406	0.317167	1.80718
574	592	15	9.485	4	LLWHFRYESLKHPKAYPKL	7.42667	0.345515	23.6273	1.23874	33.3985	0.243952	35.98	0.939038		25.658	0.476507	32.384	0.359826	34.4365	0.771453	35.3583	0.302632					-18.2313	0.822022	-8.75667	1.59856	-1.038	1.01541	0.621667	1.24167
579	592	10	6.325	4	RYESLKHPKAYPKL	13.7053	0.607742	34.2213	0.901834	49.771	1.01258	51.1075	0.221324		38.8763	0.957958	47.95	0.645988	49.4655	1.13915	50.3687	0.487853					-25.171	1.5657	-13.7287	1.54782	0.3055	2.15173	0.738833	0.709177
593	601	7	8.925	1	FSSVKWGQQ	19.2227	0.348526	52.7093	1.60975	73.786	0.779232	72.8945	1.03025		59.5533	1.19298	70.46	0.742367	74.1495	0.613062	74.73	0.265272					-40.3307	1.54151	-17.7507	2.35211	-0.3635	1.39229	-1.8355	1.29553
593	607	13	9.19	3	FSSVKWGQQEIVAKT	10.2573	0.369817	45.9287	0.55536	70.252	0.213546	77.0325	0.245366		53.1157	1.29481	68.6503	0.400312	72.664	0.31537	76.3323	0.205001					-42.8583	1.66463	-22.7217	0.955671	-2.412	0.528916	0.700167	0.450367
602	607	4	4.705	1	EIVAKT	13.211	1.31021	41.6513	1.46229	75.42	0.121622	81.362	0.00282843		48.5933	0.964684	72.864	0.27282	79.3435	0.458912	80.4473	0.526965					-35.3823	2.27489	-31.2127	1.73511	-3.9235	0.580535	0.914667	0.529794
606	611	4	9.9	2	KTYQLL	14.6607	0.46996	40.4927	1.12541	74.129	0.304056	79.002	0.62084		38.846	1.04517	68.5103	0.627587	78.7465	0.190212	80.222	0.167009					-24.1853	1.51513	-28.0177	1.75299	-4.6175	0.494268	-1.22	0.787849
611	622	10	9.485	2	LARREVWDQSAL	54.4813	0.594458	59.5107	0.212467	58.9275	0.0869741	59.0205	0.927017		51.46	0.575928	57.6497	0.776635	58.9495	0.342947	59.7823	0.0534634					3.02133	1.17039	1.861	0.989103	-0.022	0.429921	-0.761833	0.98048
612	622	9	9.155	3	ARREVWDQSAL	59.1993	0.68302	62.0633	0.43786	61.1105	0.053033	63.038	0.633568		55.6903	0.196398	61.4343	0.704927	61.9465	0.252437	61.984	0.275768					3.509	0.879418	0.629	1.14279	-0.836	0.30547	1.054	0.909336
623	630	6	12.13	1	DVGLTMQL	10.1693	1.00802	34.3643	1.77146	57.495	0.379009	75.753	1.42553		24.9103	0.388299	56.1557	1.49562	72.3465	0.00494975	80.431	0.872633					-14.741	1.39632	-21.7913	3.26708	-14.8515	0.383959	-4.678	2.29816
631	635	3	10.805	1	LDCNF	12.3937	0.984821	31.5823	1.09808	54.492	0.0141421	59.3215	0.52538		29.168	1.13879	51.4973	1.30662	58.2285	0.137886	59.1377	0.17157					-16.7743	2.12361	-19.915	2.4047	-3.7365	0.152028	0.183833	0.696951
636	642	5	4.465	1	SDENVRA	13.4993	0.350463	25.1383	1.2001	43.546	1.26855	64.1745	0.72337		22.6283	0.5881	45.0897	1.14804	66.043	0.243245	72.0247	1.11226					-9.129	0.938563	-19.9513	2.34815	-22.497	1.51179	-7.85017	1.83563
643	654	10	9.385	2	IAVQKLESLEDD	14.0507	0.112398	21.809	0.308487	28.971	0.366281	46.2005	0.501339		15.19	0.365706	25.529	0.870232	40.7665	1.1745	56.499	0.661735					-1.13933	0.478104	-3.72	1.17872	-11.7955	1.54079	-10.2985	1.16307
643	657	13	11.375	2	IAVQKLESLEDDDVL	10.164	0.371715	15.8377	0.798311	21.9365	0.768625	40.387	0.598212		10.4263	0.142746	18.568	0.668047	32.657	0.0509117	47.8487	1.00538					-0.262333	0.514461	-2.73033	1.46636	-10.7205	0.819537	-7.46167	1.60359
643	662	18	13.545	3	IAVQKLESLEDDDVLHYLLQ	4.863	0.150053	9.005	0.424278	16.5545	0.147785	29.982	0.861256		5.34067	0.162426	11.5577	0.561388	23.3465	0.297692	34.6537	1.15865					-0.477667	0.31248	-2.55267	0.985666	-6.792	0.445477	-4.67167	2.01991
643	663	19	14.165	3	IAVQKLESLEDDDVLHYLLQL	4.015	0.148203	8.02067	0.378814	16.07	0.0777817	28.454	0.0763675		4.536	0.160533	10.4197	0.353543	21.968	0.298399	34.1967	0.951946					-0.521	0.308736	-2.399	0.732357	-5.898	0.376181	-5.74267	1.02831
654	662	7	13.055	2	DDVLHYLLQ	1.02	0.392547	3.46267	0.754616	15.9145	0.0473762	30.4075	1.31451		1.25067	0.318161	5.56	0.296687	19.399	0.461034	31.5743	0.708134					-0.230667	0.710708	-2.09733	1.0513	-3.4845	0.50841	-1.16683	2.02265
658	663	4	11.86	1	HYLLQL	1.09167	0.489397	2.912	0.278081	14.1975	0.0544472	22.964	0.151321		1.086	0.438022	4.07633	0.335497	14.931	0.0622254	26.567	0.277501					0.00566667	0.927419	-1.16433	0.613578	-0.7335	0.116673	-3.603	0.428822
663	677	12	9.805	3	LVQAVKFEPYHDSAL	2.625	0.213197	6.063	0.309559	7.3965	0.419314	10.393	0.193747		5.261	0.144883	6.941	0.168911	9.4885	0.369817	13.684	0.140275					-2.636	0.35808	-0.878	0.478471	-2.092	0.789131	-3.291	0.334022
664	677	11	9.35	3	VQAVKFEPYHDSAL	2.77267	0.173339	6.623	0.241156	8.2445	0.316077	11.536	0.164049		5.70167	0.224393	7.71867	0.275017	10.755	0.14425	15.2917	0.093222					-2.929	0.397732	-1.09567	0.516173	-2.5105	0.460327	-3.75567	0.257271
666	677	9	9.005	2	AVKFEPYHDSAL	3.47	0.276816	8.538	0.137175	10.0975	0.0742462	14.1845	0.277893		7.03067	0.191996	9.721	0.226124	13.008	0.33234	18.8373	0.127453					-3.56067	0.468811	-1.183	0.363299	-2.9105	0.406586	-4.65283	0.405346
666	677	9	9.09	3	AVKFEPYHDSAL	3.31133	0.264746	8.07	0.293678	9.79	0.103238	13.754	0.284257		6.796	0.0536936	9.396	0.167821	12.641	0.178191	18.2683	0.0927218					-3.48467	0.318439	-1.326	0.4615	-2.851	0.281428	-4.51433	0.376979
681	697	15	10.32	4	LLKRGLRNKRIGHFLFW	0.501667	0.0985004	0.513667	0.106978	0.5865	0.00353553	1.516	0.164049		0.428667	0.0452806	0.461667	0.0785451	0.595	0.0452548	1.453	0.0160935					0.073	0.143781	0.052	0.185523	-0.0085	0.0487904	0.063	0.180142
681	697	15	10.44	5	LLKRGLRNKRIGHFLFW	0.241333	0.0532572	0.305	0.0167033	0.486	0.0820244	1.3345	0.0318198		0.281	0.0639296	0.308	0.0616117	0.567	0.00565685	1.48367	0.0597439					-0.0396667	0.117187	-0.003	0.078315	-0.081	0.0876812	-0.149167	0.0915637
697	713	15	9.785	4	WFLRSEIAQSRHYQQRF	2.78033	0.107612	4.697	0.160599	12.064	0.169706	21.232	0.233345		3.34733	0.0911939	6.67867	0.193898	14.84	0.704278	22.848	0.292547					-0.567	0.198806	-1.98167	0.354497	-2.776	0.873984	-1.616	0.525893
698	713	14	7.715	4	FLRSEIAQSRHYQQRF	3.91367	0.0968211	6.51167	0.316816	15.772	0.323855	26.745	0.698621		4.65933	0.107784	8.91467	0.520663	18.896	0.203647	28.0077	0.0903567					-0.745667	0.204605	-2.403	0.837479	-3.124	0.527502	-1.26267	0.788978
700	713	12	5.855	4	RSEIAQSRHYQQRF	3.884	0.0596322	6.54167	0.422798	16.1065	0.255266	27.8695	0.573464		4.36667	0.116843	8.92733	0.175648	19.046	0.555786	29.7147	0.555023					-0.482667	0.176475	-2.38567	0.598447	-2.9395	0.811051	-1.84517	1.12849
714	718	3	8.65	1	AVILE	4.12333	0.772183	1.077	0.147807	1.5615	1.02036	2.0345	1.25936		1.349	1.0718	1.55067	1.18258	3.506	0.322441	1.773	0.924056					2.77433	1.84398	-0.473667	1.33039	-1.9445	1.3428	0.2615	2.18341
714	719	4	9.275	1	AVILEA	0.589333	0.187108	0.566667	0.0316596	0.5715	0.163342	0.911	0.190919		0.508333	0.303377	0.457	0.113459	0.587	0.374767	0.997	0.329638					0.081	0.490484	0.109667	0.145119	-0.0155	0.538108	-0.086	0.520557
720	729	8	10.22	2	YLRGCGTAML	2.129	0.305226	7.11467	0.0655312	14.607	0.296985	37.7325	0.335876		1.91167	0.182325	6.876	0.117605	15.79	0.203647	38.333	0.0860697					0.217333	0.487551	0.238667	0.183136	-1.183	0.500632	-0.6005	0.421945
720	731	10	8.515	3	YLRGCGTAMLHD	2.11133	0.466845	6.57	0.188215	13.886	0.404465	35.571	0.304056		1.857	0.0839107	6.262	0.470051	15.3605	0.0318198	35.1963	0.203299					0.254333	0.550756	0.308	0.658266	-1.4745	0.436285	0.374667	0.507355
730	737	6	6.36	2	HDFTQQVQ	1.073	0.0701641	1.31767	0.259354	1.447	0.189505	2.7195	0.47164		1.339	0.223108	1.562	0.122992	2.298	0.128693	5.55967	0.917356					-0.266	0.293272	-0.244333	0.382346	-0.851	0.318198	-2.84017	1.389
730	738	7	8.335	1	HDFTQQVQV	1.35933	0.195147	1.06733	0.197751	1.6455	0.287792	2.1765	0.685186		1.15033	0.261947	1.585	0.193036	1.865	0.0339411	4.17467	1.39044					0.209	0.457094	-0.517667	0.390787	-0.2195	0.321734	-1.99817	2.07563
732	737	4	5.58	1	FTQQVQ	1.704	1.02307	1.96167	0.337595	1.754	1.04652	4.9235	1.24946		1.37933	0.204554	2.107	1.03569	4.3825	0.795495	8.433	0.677391					0.324667	1.22762	-0.145333	1.37329	-2.6285	1.84201	-3.5095	1.92685
748	767	18	11.08	3	DIKSLSAEKYDVSSQVISQL	71.2167	0.397228	71.796	0.258401	71.0685	0.430628	72.355	0.2885		69.4853	1.01016	71.177	0.572083	71.4425	0.253851	72.0147	0.256465					1.73133	1.40739	0.619	0.830484	-0.374	0.684479	0.340333	0.544965
748	782	32	12.475	5	DIKSLSAEKYDVSSQVISQLKQKLENLQNSQLPES	50.857	0.311309	67.4297	0.55647	72.471	0.340825	73.0245	0.405172		52.711	0.553533	68.2973	0.365946	72.4575	0.106773	73.1317	0.337707					-1.854	0.864842	-0.867667	0.922415	0.0135	0.447599	-0.107167	0.74288
755	782	25	12.22	3	EKYDVSSQVISQLKQKLENLQNSQLPES	45.9983	0.496014	67.727	0.308037	74.287	0.579828	74.659	0.335169		48.184	0.610465	68.4253	0.398578	73.8945	0.157685	74.679	0.103581					-2.18567	1.10648	-0.698333	0.706615	0.3925	0.737512	-0.02	0.43875
755	782	25	12.245	4	EKYDVSSQVISQLKQKLENLQNSQLPES	46.4757	0.298758	67.5183	0.297463	74.206	0.404465	74.705	0.247487		48.554	0.369146	68.8973	0.455062	74.1355	0.013435	74.7417	0.0426654					-2.07833	0.667904	-1.379	0.752525	0.0705	0.4179	-0.0366667	0.290153
762	782	18	10.54	2	QVISQLKQKLENLQNSQLPES	42.9807	0.383539	71.8023	0.130619	81.307	0.0565685	82.8655	0.132229		46.0727	0.476754	73.808	0.585733	81.4225	0.258094	82.3997	0.395374					-3.092	0.860293	-2.00567	0.716352	-0.1155	0.314663	0.465833	0.527603
767	782	13	7.465	2	LKQKLENLQNSQLPES	32.0477	0.275721	58.7447	0.671459	71.4675	0.839336	72.9875	0.952473		35.394	0.678624	61.1133	0.28912	72.07	0.130108	71.5923	0.662408					-3.34633	0.954346	-2.36867	0.960579	-0.6025	0.969443	1.39517	1.61488
768	782	12	7.165	2	KQKLENLQNSQLPES	33.4433	0.528926	59.8433	0.435497	72.598	1.09743	74.038	0.79196		37.863	1.51682	62.3047	0.540404	73.0245	0.210011	72.5777	0.426681					-4.41967	2.04575	-2.46133	0.975901	-0.4265	1.30744	1.46033	1.21864
783	796	10	10.215	3	FRVPYDPGLKAGAL	2.51533	0.297886	4.37533	0.320603	16.5745	0.297692	23.9845	0.663973		2.74967	0.0975722	4.87933	0.938921	20.8065	0.490025	29.498	0.33601					-0.234333	0.395459	-0.504	1.25952	-4.232	0.787717	-5.5135	0.999984
797	812	13	6.995	4	AIEKCKVMASKKKPLW	15.077	0.267243	20.1843	0.523731	30.1775	0.952473	35.6545	0.359917		17.6587	1.25867	21.8113	0.742216	32.563	0.568514	37.079	0.368223					-2.58167	1.52591	-1.627	1.26595	-2.3855	1.52099	-1.4245	0.72814
797	813	14	8.16	2	AIEKCKVMASKKKPLWL	12.634	0.0519711	17.239	0.549033	26.1285	0.160513	31.3505	0.293449		14.451	0.36388	19.0707	0.684808	28.7835	0.126572	33.7113	0.698589					-1.817	0.415852	-1.83167	1.23384	-2.655	0.287085	-2.36083	0.992038
797	815	16	10.42	4	AIEKCKVMASKKKPLWLEF	8.28333	0.0867544	11.2807	0.23415	17.4905	0.142128	20.646	0.521845		9.981	0.277995	13.0303	0.172512	19.278	0.130108	23.7393	0.147751					-1.69767	0.364749	-1.74967	0.406662	-1.7875	0.272236	-3.09333	0.669596
800	812	10	6.1	2	KCKVMASKKKPLW	15.615	0.646587	21.2503	0.409644	31.779	1.03379	35.6765	0.108187		17.83	0.863783	24.0197	0.416551	33.631	0.878227	38.2817	0.69938					-2.215	1.51037	-2.76933	0.826195	-1.852	1.91202	-2.60517	0.807567
802	815	11	10.875	4	KVMASKKKPLWLEF	6.689	0.108573	9.697	0.0692026	12.5815	0.0516188	14.933	0.374767		8.75333	0.492119	12.085	0.315106	14.841	0.202233	18.5847	1.05076					-2.06433	0.600692	-2.388	0.384309	-2.2595	0.253851	-3.65167	1.42553
814	823	7	9.51	1	EFKCADPTAL	16.7637	0.375215	46.5857	1.02354	59.7855	0.33729	59.183	1.86252		20.8977	0.167444	50.009	1.28868	61.1815	1.06561	62.47	0.284357					-4.134	0.542659	-3.42333	2.31222	-1.396	1.4029	-3.287	2.14688
814	842	26	12.61	4	EFKCADPTALSNETIGIIFKHGDDLRQDM	14.3297	0.159105	27.5443	0.311462	36.122	0.0650538	39.0365	0.180312		16.43	0.103937	30.798	0.770365	38.4085	0.333047	41.222	0.109586					-2.10033	0.263042	-3.25367	1.08183	-2.2865	0.398101	-2.1855	0.289898
816	823	5	6.97	1	KCADPTAL	19.6403	0.557331	53.444	0.402288	71.256	1.11581	68.6305	0.0544472		26.8757	1.35157	57.123	0.963245	71.856	0.970151	70.4577	1.22654					-7.23533	1.9089	-3.679	1.36553	-0.6	2.08597	-1.82717	1.28099
816	825	7	5.725	2	KCADPTALSN	34.3697	0.473143	59.662	0.878164	72.2265	0.269408	71.2695	1.53089		38.4007	0.458321	62.1527	0.397719	72.1835	0.56215	72.745	1.03257					-4.031	0.931464	-2.49067	1.27588	0.043	0.831558	-1.4755	2.56345
816	838	20	12.415	3	KCADPTALSNETIGIIFKHGDDL	8.551	0.173009	14.8777	0.966247	26.2485	0.935502	45.953	1.16814		9.73667	0.208164	20.8923	1.54523	38.3705	0.828022	57.457	0.464933					-1.18567	0.381173	-6.01467	2.51148	-12.122	1.76352	-11.504	1.63307
816	842	24	11.945	5	KCADPTALSNETIGIIFKHGDDLRQDM	14.726	0.307264	27.409	0.402429	35.434	0.347897	40.111	0.00565685		17.3407	0.873866	29.554	0.790584	38.6665	0.890247	41.571	0.0540648					-2.61467	1.18113	-2.145	1.19301	-3.2325	1.23814	-1.46	0.0597216
816	843	25	12.635	4	KCADPTALSNETIGIIFKHGDDLRQDML	13.1673	0.157303	25.169	0.309089	33.2585	0.249609	34.1175	0.375474		14.7857	0.231271	27.2243	0.636241	35.394	0.0961665	38.287	0.789937					-1.61833	0.388574	-2.05533	0.94533	-2.1355	0.345775	-4.1695	1.16541
824	829	4	5.64	1	SNETIG	30.4957	0.600269	48.3287	0.915268	54.95	0.987121	59.151	0.643467		32.988	0.884334	49.1367	0.693851	55.4195	1.08541	59.6623	0.503438					-2.49233	1.4846	-0.808	1.60912	-0.4695	2.07253	-0.511333	1.1469
824	842	17	10.815	4	SNETIGIIFKHGDDLRQDM	3.94067	0.303752	12.739	0.237748	20.647	0.226274	25.667	0.26163		6.07	0.358435	18.2723	1.11793	25.3205	0.344361	29.6823	0.261183					-2.12933	0.662188	-5.53333	1.35568	-4.6735	0.570635	-4.01533	0.522812
830	842	11	8.675	3	IIFKHGDDLRQDM	2.213	0.477259	9.394	0.0875043	17.82	0.349311	22.931	0.427092		4.84533	0.598508	14.0667	0.217197	22.4075	0.236881	25.2523	0.842404					-2.63233	1.07577	-4.67267	0.304701	-4.5875	0.586192	-2.32133	1.2695
844	848	3	12.275	1	ILQIL	0.305333	0.214966	0.737	0.185292	0.5465	0.36416	3.3085	0.1393		0.368333	0.214533	0.642667	0.373768	2.2495	0.368403	5.41667	1.04805					-0.063	0.429499	0.0943333	0.559059	-1.703	0.732563	-2.10817	1.18735
849	855	5	11.735	2	RIMESIW	0.624667	0.29969	0.649333	0.166584	0.771	0.189505	3.327	0.247487		1.09967	0.318453	2.60067	0.841044	8.185	0.415779	20.2677	1.15835					-0.475	0.618143	-1.95133	1.00763	-7.414	0.605283	-16.9407	1.40583
849	860	10	12.35	2	RIMESIWETESL	1.43933	0.323621	3.925	0.200082	12.8005	0.0459619	22.9985	0.549422		4.40667	1.53971	6.732	0.212205	26.9765	0.853478	39.486	1.16382					-2.96733	1.86333	-2.807	0.412288	-14.176	0.89944	-16.4875	1.71324
853	861	7	11.57	1	SIWETESLD	6.03467	0.284367	10.9333	0.348879	22.6145	0.949644	42.6125	1.31027		10.2503	0.265816	27.6803	1.04502	40.596	0.362039	49.4977	0.646509					-4.21567	0.550183	-16.747	1.3939	-17.9815	1.31168	-6.88517	1.95678
853	862	8	13.405	1	SIWETESLDL	4.84967	0.358952	9.154	0.190402	20.117	0.0763675	36.2305	0.386787		8.21233	0.864012	21.8807	0.541888	32.4965	0.228395	45.8327	0.644207					-3.36267	1.22296	-12.7267	0.73229	-12.3795	0.304763	-9.60217	1.03099
862	869	5	13.465	1	LCLLPYGC	3.43667	0.28029	8.48833	0.64941	20.0145	0.253851	35.894	0.383252		7.94667	0.817629	14.9803	0.0832426	29.463	0.709935	44.891	0.928416					-4.51	1.09792	-6.492	0.732653	-9.4485	0.963787	-8.997	1.31167
862	878	14	13.1	2	LCLLPYGCISTGDKIGM	2.22833	0.171436	4.61667	0.240729	11.908	0.282843	22.2505	0.844993		8.73267	0.43587	13.628	0.627305	21.775	0.479418	31.0477	1.24908					-6.50433	0.607306	-9.01133	0.868033	-9.867	0.762261	-8.79717	2.09407
863	880	15	12.46	2	CLLPYGCISTGDKIGMIE	2.32767	0.560227	4.46267	0.249187	11.006	0.113137	19.5105	0.682358		3.24867	0.23314	6.60767	0.0732826	18.8645	0.320319	28.0527	1.20872					-0.921	0.793367	-2.145	0.32247	-7.8585	0.433456	-8.54217	1.89107
870	878	7	7.655	2	ISTGDKIGM	5.36167	0.374714	7.424	0.526658	15.6635	0.350018	25.4525	1.33997		13.5303	0.526823	17.7427	0.540691	21.58	0.407294	29.617	1.14831					-8.16867	0.901537	-10.3187	1.06735	-5.9165	0.757311	-4.1645	2.48828
879	887	7	7.315	1	IEIVKDATT	21.0813	0.441888	38.48	0.763559	50.03	0.478004	54.0355	0.299106		26.4723	0.663486	41.633	0.439314	53.635	0.148492	57.4727	0.340783					-5.391	1.10537	-3.153	1.20287	-3.605	0.626497	-3.43717	0.63989
879	901	21	9.96	2	IEIVKDATTIAKIQQSTVGNTGA	34.0737	0.22187	42.588	0.35334	50.329	1.36047	57.183	0.448306		36.8497	0.591764	46.378	0.344129	55.943	0.868327	63.428	0.118823					-2.776	0.813634	-3.79	0.697469	-5.614	2.2288	-6.245	0.567129
880	888	7	7.215	2	EIVKDATTI	22.3277	0.489597	40.4017	0.791669	51.276	0.0749533	55.566	0.118794		28.9623	0.432511	43.41	0.348699	55.327	0.366281	59.7613	0.553245					-6.63467	0.922108	-3.00833	1.14037	-4.051	0.441235	-4.19533	0.672039
888	901	12	6.14	2	IAKIQQSTVGNTGA	51.6157	0.627628	56.66	0.406366	61.804	0.634982	71.7305	1.38098		56.749	0.985314	61.8787	0.579001	67.075	0.272943	74.0023	0.246885					-5.13333	1.61294	-5.21867	0.985367	-5.271	0.907925	-2.27183	1.62786
888	902	13	8.61	2	IAKIQQSTVGNTGAF	48.786	0.621134	54.6223	0.860005	59.8855	0.383959	68.6225	0.490025		54.942	0.588258	59.8713	1.17839	63.875	1.22471	70.3037	0.333761					-6.156	1.20939	-5.249	2.0384	-3.9895	1.60867	-1.68117	0.823786
888	907	18	9.585	3	IAKIQQSTVGNTGAFKDEVL	34.2933	0.408221	42.1883	0.266673	47.3135	0.194454	55.1075	0.815294		41.2603	0.214225	47.9833	0.342608	51.6345	0.0247487	58.4223	0.198578					-6.967	0.622446	-5.795	0.609281	-4.321	0.219203	-3.31483	1.01387
888	910	21	10.56	3	IAKIQQSTVGNTGAFKDEVLNHW	28.2737	0.467868	34.3967	0.41222	38.6635	0.10253	46.086	0.106066		35.916	0.509729	41.985	0.752887	45.6915	0.241123	51.728	0.0895991					-7.64233	0.977597	-7.58833	1.16511	-7.028	0.343654	-5.642	0.195665
902	910	7	10.075	3	FKDEVLNHW	2.30567	0.116006	4.16067	0.156059	11.8915	0.0374767	20.141	0.53033		10.9777	0.942976	16.5483	0.370541	21.9285	0.142128	30.4153	0.529544					-8.672	1.05898	-12.3877	0.526599	-10.037	0.179605	-10.2743	1.05987
902	924	20	9.46	3	FKDEVLNHWLKEKSPTEEKFQAA	6.85767	0.737364	11.3323	0.0878996	17.0445	0.210011	30.6545	0.1393		9.164	0.498545	27.2287	0.949858	33.1245	0.832265	43.444	0.898192					-2.30633	1.23591	-15.8963	1.03776	-16.08	1.04228	-12.7895	1.03749
925	934	8	9.13	2	VERFVYSCAG	2.05933	0.297942	1.99733	0.19468	1.8965	0.143543	2.2465	0.685186		2.99933	0.307038	15.8357	0.952849	21.169	1.12147	21.7933	0.757458					-0.94	0.60498	-13.8383	1.14753	-19.2725	1.26501	-19.5468	1.44264
927	934	6	8.445	2	RFVYSCAG	1.32633	0.191145	1.25	0.0606548	1.8205	0.704985	1.5675	0.0940452		7.95433	0.494342	11.1317	1.04549	14.0995	0.234052	18.27	0.579552					-6.628	0.685487	-9.88167	1.10615	-12.279	0.939038	-16.7025	0.673598
935	939	3	7.04	1	YCVAT	0.802	0.135281	0.76	0.160477	0.854	0.683065	0.8615	0.25668		1.99367	0.82913	8.624	0.162148	12.7125	0.0586899	17.389	0.24574					-1.19167	0.964411	-7.864	0.322625	-11.8585	0.741755	-16.5275	0.502419
940	953	12	10.64	2	FVLGIGDRHNDNIM	1.31267	0.0440946	2.29967	0.21451	5.927	0	10.0755	0.00494975		6.19133	0.230079	8.738	0.697275	14.361	0.0749533	19.3563	0.196495					-4.87867	0.274174	-6.43833	0.911785	-8.434	0.0749533	-9.28083	0.201445
954	960	5	7.695	1	ITETGNL	3.79	0.411519	14.551	0.287661	25.5095	0.385373	32.7255	0.785596		17.506	0.806595	26.8203	1.05494	35.1495	0.293449	42.3793	0.393754					-13.716	1.21811	-12.2693	1.3426	-9.64	0.678823	-9.65383	1.17935
954	961	6	11.37	1	ITETGNLF	3.73	0.860957	10.641	0.438394	17.33	0.383252	20.606	0.172534		13.4767	0.823587	21.0247	0.265165	25.217	0.690136	30.6417	0.219628					-9.74667	1.68454	-10.3837	0.703558	-7.887	1.07339	-10.0357	0.392162
961	972	10	12.765	3	FHIDFGHILGNY	29.9743	0.214952	36.054	0.432806	39.217	0.36911	41.9065	0.881762		28.18	0.196031	36.458	0.623885	40.8315	0.0431335	44.1897	0.295772					1.79433	0.410983	-0.404	1.05669	-1.6145	0.412243	-2.28317	1.17753
961	975	13	12.535	4	FHIDFGHILGNYKSF	37.133	0.272676	41.5757	0.456791	43.617	0.657609	45.9145	0.24678		35.1273	0.570199	40.8067	0.582795	44.6295	0.127986	47.1823	0.130216					2.00567	0.842874	0.769	1.03959	-1.0125	0.785596	-1.26783	0.376997
962	975	12	11.355	3	HIDFGHILGNYKSF	44.0513	0.243968	49.1973	0.285062	51.3895	0.48154	53.5425	0.160513		38.977	0.229475	48.1883	0.378346	51.978	0.0523259	53.9913	0.966704					5.07433	0.473443	1.009	0.663408	-0.5885	0.533866	-0.448833	1.12722
973	979	5	10.305	2	KSFLGIN	3.153	0.540423	5.10767	0.612	16.394	1.56129	22.7715	0.953887		6.52667	1.14899	7.06	0.603043	19.62	0.929138	27.246	0.924932					-3.37367	1.68941	-1.95233	1.21504	-3.226	2.49043	-4.4745	1.87882
993	1014	19	9.68	3	FVMGTSGKKTSPHFQKFQDICV	3.88667	0.0742249	5.275	0.169009	6.902	0.0155563	10.5145	0.243952		8.44767	0.337272	11.7057	0.25838	15.6945	0.576292	21.09	0.120254					-4.561	0.411497	-6.43067	0.427389	-8.7925	0.591848	-10.5755	0.364206
993	1014	19	9.57	4	FVMGTSGKKTSPHFQKFQDICV	3.72	0.0912798	5.02767	0.0680612	6.9895	0.147785	10.9585	0.00494975		8.43133	0.449213	11.987	0.286126	15.916	0.585484	21.0127	0.406579					-4.71133	0.540493	-6.95933	0.354187	-8.9265	0.73327	-10.0542	0.411529
1035	1042	5	11.865	1	LMTGMPQL	32.5033	0.658836	55.6907	0.360895	70.431	0.87257	73.161	0.811759		40.2373	0.772222	64.1133	0.925005	72.2255	0.895904	72.568	0.1803					-7.734	1.43106	-8.42267	1.2859	-1.7945	1.76847	0.593	0.992058
1035	1050	13	10.92	2	LMTGMPQLTSKEDIEY	29.3693	0.468391	45.442	0.431322	59.893	0.376181	62.2775	0.590434		34.973	0.608974	53.4593	1.05242	61.903	0.410122	62.256	0.62468					-5.60367	1.07736	-8.01733	1.48374	-2.01	0.786303	0.0215	1.21511
1036	1049	11	9.49	2	MTGMPQLTSKEDIE	34.4557	0.475421	50.1357	0.329855	61.8625	0.105359	65.4925	0.177484		40.8243	1.3641	56.6337	0.176911	63.9885	0.621547	65.699	0.566045					-6.36867	1.83952	-6.498	0.506766	-2.126	0.726906	-0.2065	0.743529
1050	1071	20	9.75	4	YIRDALTVGKNEEDAKKYFLDQ	11.7387	0.0929534	13.1363	0.233344	15.3805	0.0997021	24.2945	0.56215		29.157	1.37912	41.6443	0.41921	53.285	0.240416	63.3523	0.169356					-17.4183	1.47207	-28.508	0.652554	-37.9045	0.340118	-39.0578	0.731506
1051	1071	19	9.485	4	IRDALTVGKNEEDAKKYFLDQ	11.292	0.209215	12.6623	0.274446	14.2695	0.144957	21.314	0.10748		25.4147	0.668029	36.6707	0.569215	47.9545	1.25653	60.1107	0.463071					-14.1227	0.877244	-24.0083	0.84366	-33.685	1.40149	-38.7967	0.570551
1072	1084	11	11.26	2	IEVCRDKGWTVQF	10.461	0.310517	28.0217	0.446717	45.3395	0.173241	48.867	0.321026		19.6273	0.382541	38.6873	0.617576	52.4335	0.231224	58.432	0.179424					-9.16633	0.693058	-10.6657	1.06429	-7.094	0.404465	-9.565	0.500451
1074	1084	9	10.755	3	VCRDKGWTVQF	11.7077	0.373322	33.0873	0.296083	53.854	0.38608	57.4775	0.784181		17.119	0.256533	40.8503	1.02562	54.754	0.165463	56.3693	0.261689					-5.41133	0.629855	-7.763	1.32171	-0.9	0.551543	1.10817	1.04587
1088	1092	3	11.015	2	LHLVL	31.6623	1.63175	76.7383	0.930646	78.8035	0.635689	79.3145	0.499924		21.8193	0.537231	53.1797	0.744541	64.431	0.526087	72.9293	0.581007					9.843	2.16898	23.5587	1.67519	14.3725	1.16178	6.38517	1.08093
954	992	35	1.21084	5	ITETGNLFHIDFGHILGNYKSFLGINKERVPFVLTPDFL	32.087	0.536299	35.9017	0.528365	38.616	0.813173	40.406	0.956008		30.5647	0.641503	38.8263	0.325617	47.0475	0.27365	57.701	0.772656					1.52233	1.1778	-2.92467	0.853982	-8.4315	1.08682	-17.295	1.72866
961	992	28	3.79752	6	FHIDFGHILGNYKSFLGINKERVPFVLTPDFL	39.1933	0.818757	43.147	0.492076	46.288	0.688722	47.319	0.840043		36.932	0.624707	45.9557	0.810221	54.282	0.516188	66.03	0.639346					2.26133	1.44346	-2.80867	1.3023	-7.994	1.20491	-18.711	1.47939
973	992	16	1.17864	4	KSFLGINKERVPFVLTPDFL	28.6633	0.0172143	31.8573	0.379637	35.699	0.309713	36.94	0.898026		29.1013	0.177697	44.436	1.00936	52.086	1.02106	69.4143	0.316143					-0.438	0.194912	-12.5787	1.38899	-16.387	1.33077	-32.4743	1.21417
976	992	13	0.758739	3	LGINKERVPFVLTPDFL	20.4247	0.128633	24.6497	0.558513	29.1115	0.465983	30.6685	1.22117		23.2237	0.0944052	38.0967	0.303885	49.0255	0.659731	70.435	0.775101					-2.799	0.223038	-13.447	0.862398	-19.914	1.12571	-39.7665	1.99627
980	992	9	0.468641	3	KERVPFVLTPDFL	5.949	0.208828	11.1047	0.541245	17.025	0.456791	19.634	0.35921		14.033	1.15742	31.133	1.08098	46.9755	0.812466	76.1127	0.521627					-8.084	1.36625	-20.0283	1.62223	-29.9505	1.26926	-56.4787	0.880837
1015	1027	11	0.678381	2	KAYLALRHHTNLL	1.86767	0.322547	2.704	0.30583	6.9	0.779232	12.406	0.745291
1017	1026	8	2.10076	3	YLALRHHTNL	3.52667	0.228946	4.50967	0.481689	9.9305	0.321734	16.727	0.608112		40.8087	0.358422	41.6903	0.331759	47.558	0.275772	55.778	0.355511					-37.282	0.587368	-37.1807	0.813448	-37.6275	0.597505	-39.051	0.963623
1019	1026	6	2.29548	3	ALRHHTNL	8.10933	0.83398	8.61567	1.11534	16.677	0.00141421	25.6545	0.62579

## Sheet: Fig 2-Fig supplement 1 raw data
							3s						3s						3s						30s						30s						30s						300s						300s
State	Start	End	Sequence	Search RT	Charge	Max D	Start RT	End RT	#D	%D	Score	Conf	Start RT	End RT	#D	%D	Score	Conf	Start RT	End RT	#D	%D	Score	Conf	Start RT	End RT	#D	%D	Score	Conf	Start RT	End RT	#D	%D	Score	Conf	Start RT	End RT	#D	%D	Score	Conf	Start RT	End RT	#D	%D	Score	Conf	Start RT
Apo_p110g	3	12	LENYKQPVVL	9.52	1	7	9.48	9.55	4.867	75.987	0.8007	Medium	9.51	9.59	4.848	75.688	0.8458	Medium	9.51	9.59	4.925	76.892	0.8393	Medium	9.43	9.5	4.832	75.435	0.7722	Medium	9.45	9.52	4.785	74.712	0.7924	Medium	9.5	9.59	4.787	74.738	0.8267	Medium	9.53	9.6	4.699	73.363	0.8294	Medium	9.51
Apo_p110g	6	12	YKQPVVL	8.8	1	4	8.79	8.85	3.187	87.083	0.9197	Medium	8.78	8.85	3.145	85.922	0.9176	Medium	8.78	8.85	3.18	86.885	0.9244	Medium	8.79	8.85	3.197	87.351	0.9059	Medium	8.79	8.85	3.185	87.031	0.9205	Medium	8.78	8.85	3.237	88.447	0.9249	Medium	8.78	8.85	3.201	87.459	0.9275	Medium	8.78
Apo_p110g	36	41	ELIPIE	10.59	1	3	10.7	10.77	0.045	1.633	0.8785	High	10.7	10.77	0.039	1.412	0.8861	High	10.7	10.77	0.048	1.737	0.8781	High	10.7	10.77	0.064	2.337	0.8865	High	10.7	10.78	0.069	2.511	0.8745	High	10.7	10.77	0.08	2.918	0.8711	High	10.7	10.77	0.241	8.765	0.8918	High	10.7
Apo_p110g	36	42	ELIPIEF	13.88	1	4	13.96	14.04	0.057	1.552	0.8237	Medium	13.96	14.04	0.048	1.317	0.8293	Medium	13.96	14.04	0.073	1.993	0.8239	Medium	13.96	14.04	0.102	2.786	0.8322	Medium	13.96	14.04	0.083	2.275	0.8506	Medium	13.96	14.04	0.146	3.997	0.8393	Medium	13.96	14.04	0.292	7.985	0.8439	Medium	13.96
Apo_p110g	42	58	FVLPTSQRKCKSPETAL	8.48	2	13	8.34	8.48	3.444	28.95	0.9513	High	8.34	8.48	3.351	28.167	0.9531	High	8.34	8.48	3.456	29.055	0.9514	High	8.34	8.48	4.417	37.131	0.9491	High	8.34	8.48	4.361	36.667	0.9429	High	8.34	8.48	4.546	38.214	0.9423	High	8.34	8.48	5.034	42.323	0.9408	High	8.34
Apo_p110g	42	59	FVLPTSQRKCKSPETALL	9.46	2	14	9.47	9.56	2.944	22.985	0.9306	High	9.47	9.56	2.85	22.247	0.9338	High	9.47	9.56	2.944	22.979	0.9274	High	9.47	9.56	3.852	30.069	0.9365	High	9.47	9.56	3.754	29.304	0.9299	High	9.47	9.56	3.875	30.247	0.9207	High	9.47	9.56	4.429	34.578	0.9292	High	9.47
Apo_p110g	43	59	VLPTSQRKCKSPETALL	8.07	2	13	8.04	8.11	3.564	29.964	0.9037	High	8.04	8.1	3.464	29.123	0.8892	Medium	8.04	8.1	3.537	29.733	0.8912	Medium	8.04	8.11	4.603	38.694	0.9147	High	8.04	8.11	4.537	38.142	0.9091	High	8.04	8.11	4.744	39.885	0.9054	High	8.04	8.1	5.203	43.738	0.9041	High	8.04
Apo_p110g	59	69	LHVAGHGNVEQ	5.03	2	9	5.03	5.1	0.668	8.108	0.8322	Medium	5.03	5.1	0.714	8.667	0.8225	Medium	5.03	5.1	0.709	8.606	0.8073	Medium	5.03	5.1	1.365	16.575	0.8427	Medium	5.03	5.1	1.364	16.567	0.8254	Medium	5.03	5.1	1.426	17.315	0.7947	Medium	5.04	5.1	2.103	25.533	0.8305	Medium	5.03
Apo_p110g	59	70	LHVAGHGNVEQM	6.54	2	10	6.64	6.74	0.578	6.316	0.903	High	6.64	6.74	0.513	5.61	0.9289	High	6.64	6.74	0.586	6.402	0.9257	High	6.64	6.74	1.14	12.461	0.9149	High	6.64	6.74	1.15	12.57	0.9133	High	6.64	6.74	1.153	12.599	0.9069	High	6.64	6.74	1.721	18.812	0.9222	High	6.64
Apo_p110g	59	74	LHVAGHGNVEQMKAQV	6.81	2	14	6.74	6.81	0.444	3.465	0.8891	Medium	6.74	6.81	0.422	3.291	0.8902	Medium	6.74	6.81	0.488	3.809	0.898	Medium	6.74	6.81	0.909	7.093	0.8862	Medium	6.74	6.81	0.935	7.302	0.8933	Medium	6.74	6.81	0.997	7.781	0.8914	Medium	6.74	6.81	1.5	11.712	0.8661	Medium	6.74
Apo_p110g	60	69	HVAGHGNVEQ	3.57	2	8	3.67	3.74	0.625	8.541	0.8558	Medium	3.67	3.74	0.587	8.022	0.843	Medium	3.67	3.74	0.651	8.889	0.8681	Medium	3.67	3.74	1.406	19.201	0.803	Medium	3.67	3.74	1.403	19.171	0.8294	Medium	3.67	3.74	1.403	19.166	0.8392	Medium	3.67	3.75	2.093	28.597	0.805	Medium	3.67
Apo_p110g	60	70	HVAGHGNVEQM	5.29	1	9	5.28	5.38	0.471	5.725	0.8612	Medium	5.28	5.38	0.536	6.509	0.8608	Medium	5.28	5.38	0.509	6.185	0.8683	Medium	5.28	5.38	1.07	12.997	0.8834	Medium	5.28	5.38	1.107	13.444	0.8786	Medium	5.28	5.38	1.147	13.932	0.8665	Medium	5.28	5.38	1.859	22.577	0.8722	Medium	5.33
Apo_p110g	71	76	KAQVWL	10.59	1	4	10.71	10.78	0.035	0.964	0.9404	Medium	10.71	10.78	0.035	0.944	0.9414	Medium	10.71	10.78	0.038	1.027	0.9345	Medium	10.71	10.78	0.051	1.394	0.9288	Medium	10.71	10.78	0.042	1.145	0.9388	Medium	10.71	10.78	0.041	1.108	0.9206	Medium	10.71	10.78	0.066	1.81	0.9242	Medium	10.71
Apo_p110g	77	84	RALETSVA	6.28	2	6	6.19	6.26	1.902	34.645	0.8527	Medium	6.13	6.2	1.898	34.579	0.8545	Medium	6.19	6.26	1.952	35.548	0.8927	Medium	6.16	6.23	2.732	49.764	0.865	Medium	6.19	6.26	2.764	50.355	0.8412	Medium	6.19	6.26	2.75	50.092	0.8686	Medium	6.19	6.27	3.207	58.419	0.7977	Medium	6.22
Apo_p110g	79	84	LETSVA	6.27	1	4	6.28	6.36	1.87	51.086	0.9291	Medium	6.32	6.39	1.841	50.291	0.9173	Medium	6.28	6.36	1.893	51.725	0.9317	Medium	6.28	6.36	2.605	71.163	0.9264	Medium	6.28	6.36	2.628	71.811	0.9275	Medium	6.28	6.36	2.679	73.184	0.9188	Medium	6.28	6.36	2.931	80.086	0.9094	Medium	6.28
Apo_p110g	79	86	LETSVAAD	6.06	1	6	6.17	6.23	3.076	56.029	0.9067	Medium	6.17	6.23	3.052	55.595	0.8942	High	6.17	6.23	3.096	56.399	0.9213	High	6.17	6.23	3.951	71.958	0.8864	Medium	6.17	6.23	3.88	70.675	0.9029	Medium	6.17	6.23	4.021	73.236	0.8883	Medium	6.17	6.23	4.257	77.545	0.8686	Medium	6.17
Apo_p110g	87	99	FYHRLGPHHFLLL	10.38	4	10	10.24	10.3	0.248	2.715	0.9641	High	10.24	10.3	0.24	2.621	0.9191	High	10.24	10.3	0.244	2.662	0.9504	High	10.24	10.3	0.559	6.11	0.9425	High	10.24	10.31	0.516	5.644	0.9403	High	10.24	10.3	0.544	5.941	0.9539	High	10.24	10.3	0.652	7.125	0.951	High	10.24
Apo_p110g	88	98	YHRLGPHHFLL	8.43	4	8	8.6	8.67	0.265	3.619	0.9106	High	8.6	8.67	0.273	3.733	0.9062	High	8.6	8.67	0.301	4.117	0.9277	High	8.6	8.67	0.632	8.628	0.8869	Medium	8.6	8.67	0.638	8.716	0.904	High	8.6	8.67	0.661	9.035	0.9135	High	8.6	8.67	0.76	10.378	0.8946	High	8.6
Apo_p110g	88	99	YHRLGPHHFLLL	9.88	4	9	10.02	10.09	0.279	3.39	0.9418	High	10.02	10.08	0.257	3.125	0.9427	High	10.02	10.08	0.292	3.541	0.9377	High	10.02	10.09	0.584	7.095	0.9456	High	10.02	10.09	0.564	6.85	0.9382	High	10.02	10.09	0.57	6.924	0.9273	High	10.02	10.09	0.713	8.66	0.9325	High	10.02
Apo_p110g	100	106	YQKKGQW	5.9	1	5	6.05	6.12	1.413	30.892	0.9385	High	6.05	6.12	1.363	29.802	0.942	High	6.05	6.12	1.419	31.016	0.9327	High	6.03	6.1	2.35	51.366	0.916	High	6.06	6.13	2.358	51.551	0.9173	High	6.05	6.12	2.389	52.228	0.916	High	6	6.06	2.61	57.042	0.896	High	6.05
Apo_p110g	107	113	YEIYDKY	9.07	1	5	9.02	9.09	1.106	24.166	0.8267	Medium	9.02	9.09	1.097	23.989	0.8563	Medium	9.02	9.09	1.093	23.893	0.7942	Medium	9.02	9.09	1.845	40.338	0.8459	Medium	9.02	9.09	1.862	40.689	0.829	Medium	9.04	9.11	1.96	42.841	0.7889	Medium	9.02	9.09	2.424	52.98	0.8409	Medium	9.02
Apo_p110g	107	118	YEIYDKYQVVQT	9.45	2	10	9.37	9.45	1.006	10.994	0.9056	High	9.37	9.45	1.031	11.273	0.9177	High	9.37	9.45	1.033	11.287	0.8978	High	9.37	9.45	1.837	20.079	0.9183	High	9.37	9.45	1.803	19.705	0.9121	High	9.37	9.45	1.887	20.619	0.8981	High	9.37	9.45	3.09	33.774	0.9206	High	9.37
Apo_p110g	107	119	YEIYDKYQVVQTL	10.78	2	11	10.77	10.84	1.071	10.64	0.7931	Medium	10.79	10.86	1.045	10.383	0.8291	Medium	10.77	10.84	1.099	10.915	0.774	Medium	10.77	10.84	1.821	18.096	0.8315	Medium	10.78	10.84	1.769	17.577	0.8362	Medium	10.77	10.84	1.825	18.133	0.8214	Medium	10.77	10.84	3.059	30.392	0.7992	Medium	10.77
Apo_p110g	122	137	LRYWKATHRSPGQIHL	7.45	4	13	7.57	7.64	0.352	2.958	0.9025	High	7.57	7.65	0.385	3.236	0.9122	High	7.57	7.64	0.412	3.467	0.8993	Medium	7.57	7.64	1.03	8.661	0.9098	High	7.57	7.65	1.043	8.769	0.9007	High	7.57	7.64	1.178	9.904	0.8867	Medium	7.57	7.64	1.904	16.008	0.9102	High	7.57
Apo_p110g	122	149	LRYWKATHRSPGQIHLVQRHPPSEESQA	6.23	5	23	6.39	6.47	1.873	8.898	0.9361	High	6.39	6.47	1.712	8.133	0.9368	High	6.39	6.47	1.839	8.736	0.938	High	6.39	6.47	3.282	15.597	0.9359	High	6.39	6.47	3.381	16.064	0.9379	High	6.39	6.47	3.576	16.994	0.9318	High	6.39	6.47	4.949	23.517	0.9239	High	6.39
Apo_p110g	125	137	WKATHRSPGQIHL	6.85	3	10	6.87	6.95	0.458	5.006	0.8879	High	6.87	6.95	0.471	5.144	0.9033	High	6.87	6.95	0.527	5.754	0.9006	High	6.87	6.95	1.287	14.065	0.9286	High	6.91	6.98	1.344	14.685	0.9191	High	6.87	6.95	1.229	13.436	0.8952	High	6.87	6.95	1.589	17.371	0.9012	High	6.87
Apo_p110g	138	149	VQRHPPSEESQA	4.07	2	8	4.12	4.19	2.822	38.552	0.9284	High	4.07	4.15	2.761	37.716	0.9324	High	4.08	4.15	2.723	37.203	0.9417	High	4.08	4.15	3.741	51.105	0.9331	High	4.08	4.15	3.652	49.896	0.9233	High	4.08	4.15	3.737	51.054	0.9204	High	4.07	4.16	4.536	61.966	0.925	High	4.07
Apo_p110g	146	157	ESQAFQRQLTAL	10.35	2	10	10.22	10.29	0.279	3.046	0.8722	Medium	10.22	10.29	0.25	2.727	0.8496	Medium	10.22	10.29	0.293	3.206	0.8757	Medium	10.22	10.29	1.112	12.156	0.7928	Medium	10.22	10.29	1.054	11.522	0.7992	Medium	10.22	10.29	1.212	13.251	0.8209	Medium	10.2	10.27	2.67	29.181	0.7236	Medium	10.22
Apo_p110g	150	157	FQRQLTAL	9.07	1	6	9.07	9.14	0.109	1.978	0.93	High	9.07	9.14	0.109	1.989	0.9329	High	9.07	9.14	0.132	2.406	0.9134	High	9.07	9.14	0.277	5.048	0.9291	High	9.07	9.14	0.268	4.88	0.9275	High	9.07	9.14	0.319	5.815	0.9145	High	9.07	9.14	1.009	18.376	0.9276	High	9.07
Apo_p110g	151	157	QRQLTAL	7.99	2	5	8.06	8.12	0.101	2.207	0.9352	High	8.05	8.12	0.101	2.209	0.9224	High	8.05	8.12	0.119	2.591	0.9287	High	8.06	8.12	0.258	5.643	0.9278	High	8.06	8.12	0.273	5.962	0.9246	High	8.05	8.12	0.332	7.253	0.9224	High	8.05	8.12	0.897	19.607	0.9163	High	8.05
Apo_p110g	158	164	IGYDVTD	8.21	1	5	8.31	8.37	0.595	13.001	0.9051	High	8.31	8.37	0.554	12.109	0.9297	High	8.31	8.37	0.575	12.571	0.9181	High	8.31	8.37	0.882	19.278	0.9001	High	8.31	8.38	0.856	18.708	0.9111	High	8.31	8.37	0.887	19.387	0.9108	High	8.31	8.37	1.87	40.869	0.8935	High	8.31
Apo_p110g	158	172	IGYDVTDVSNVHDDE	8.84	2	13	8.79	8.85	2.813	23.646	0.7464	Medium	8.74	8.81	2.757	23.178	0.8122	Medium	8.74	8.81	2.845	23.914	0.7277	Medium	8.74	8.81	3.55	29.841	0.8672	Medium	8.74	8.81	3.504	29.457	0.8117	Medium	8.74	8.81	3.691	31.033	0.7586	Medium	8.74	8.81	4.634	38.961	0.8758	Medium	8.74
Apo_p110g	158	173	IGYDVTDVSNVHDDEL	10.35	2	14	10.34	10.41	2.529	19.741	0.8587	Medium	10.34	10.41	2.568	20.051	0.8922	Medium	10.34	10.41	2.664	20.798	0.8963	Medium	10.34	10.41	3.879	30.284	0.8394	Medium	10.34	10.41	3.647	28.469	0.8434	Medium	10.34	10.41	3.802	29.681	0.824	Medium	10.34	10.41	5.126	40.017	0.8101	Medium	10.34
Apo_p110g	158	174	IGYDVTDVSNVHDDELE	9.93	2	15	9.95	10.03	2.608	19.005	0.9109	High	9.95	10.03	2.604	18.973	0.9253	High	9.95	10.03	2.707	19.723	0.9073	High	9.95	10.03	3.924	28.593	0.9171	High	9.95	10.03	3.748	27.306	0.9004	High	9.95	10.03	3.913	28.512	0.9046	High	9.95	10.03	5.002	36.447	0.9196	High	9.95
Apo_p110g	161	172	DVTDVSNVHDDE	6.76	2	10	6.54	6.61	2.752	30.075	0.7921	Medium	6.53	6.61	2.677	29.258	0.7785	Medium	6.54	6.61	2.754	30.099	0.7416	Medium	6.5	6.58	3.73	40.77	0.6693	Medium	6.54	6.61	3.709	40.536	0.7886	Medium	6.58	6.64	3.755	41.035	0.7616	Medium	6.5	6.57	4.428	48.394	0.768	Medium	6.54
Apo_p110g	161	174	DVTDVSNVHDDELE	8.32	2	12	8.42	8.49	2.45	22.31	0.9284	High	8.41	8.49	2.409	21.938	0.9386	High	8.41	8.49	2.508	22.845	0.9183	High	8.42	8.49	3.664	33.366	0.9338	High	8.42	8.49	3.592	32.711	0.9323	High	8.42	8.49	3.752	34.172	0.9174	High	8.42	8.49	4.491	40.906	0.924	High	8.42
Apo_p110g	161	175	DVTDVSNVHDDELEF	11.28	2	13	11.39	11.46	2.226	18.711	0.8991	Medium	11.39	11.46	2.253	18.941	0.8977	Medium	11.39	11.46	2.328	19.568	0.9036	Medium	11.39	11.46	3.361	28.256	0.887	Medium	11.39	11.46	3.3	27.745	0.894	Medium	11.39	11.46	3.424	28.789	0.8955	Medium	11.39	11.46	4.185	35.185	0.892	Medium	11.39
Apo_p110g	165	174	VSNVHDDELE	6.54	1	8	6.65	6.72	0.988	13.492	0.7999	Medium	6.65	6.72	0.958	13.087	0.8173	Medium	6.65	6.72	1.054	14.395	0.824	Medium	6.65	6.72	2.081	28.422	0.7853	Medium	6.63	6.7	2.166	29.583	0.8275	Medium	6.71	6.78	2.241	30.614	0.7541	Medium	6.65	6.72	2.671	36.484	0.7605	Medium	6.65
Apo_p110g	174	182	EFTRRGLVT	7.02	1	7	6.97	7.04	0.186	2.903	0.8923	Medium	6.97	7.04	0.161	2.51	0.9078	Medium	6.97	7.04	0.151	2.352	0.9201	High	6.97	7.04	0.204	3.191	0.8579	Medium	6.97	7.04	0.243	3.792	0.9014	Medium	6.97	7.04	0.306	4.775	0.8917	Medium	6.97	7.04	0.592	9.249	0.8698	Medium	6.97
Apo_p110g	174	182	EFTRRGLVT	7.02	2	7	6.9	7.29	0.154	2.412	0.9399	High	6.9	7.29	0.16	2.5	0.9309	High	6.9	7.29	0.192	2.992	0.9327	High	6.9	7.29	0.229	3.573	0.9356	Medium	6.9	7.29	0.228	3.559	0.9334	High	6.9	7.29	0.281	4.392	0.9318	High	6.9	7.29	0.62	9.682	0.9133	High	6.9
Apo_p110g	174	187	EFTRRGLVTPRMAE	7.6	2	11	7.69	7.75	0.204	2.024	0.8393	Medium	7.69	7.75	0.239	2.376	0.8313	Medium	7.68	7.75	0.241	2.394	0.8585	Medium	7.69	7.75	0.313	3.111	0.8275	Medium	7.69	7.75	0.318	3.162	0.845	Medium	7.69	7.75	0.384	3.812	0.8498	Medium	7.68	7.75	0.833	8.278	0.8465	Medium	7.69
Apo_p110g	174	195	EFTRRGLVTPRMAEVASRDPKL	8.27	5	18	8.27	8.35	0.838	5.086	0.8946	Medium	8.27	8.35	0.897	5.445	0.9314	High	8.27	8.35	0.949	5.764	0.9235	High	8.27	8.35	1.615	9.804	0.9094	High	8.27	8.35	1.459	8.856	0.9065	High	8.27	8.35	1.614	9.802	0.9186	High	8.19	8.26	2.98	18.092	0.908	High	8.31
Apo_p110g	175	182	FTRRGLVT	6.27	1	6	6.18	6.24	0.143	2.613	0.8225	Medium	6.17	6.24	0.147	2.67	0.7929	Medium	6.17	6.24	0.175	3.185	0.8109	Medium	6.18	6.24	0.293	5.329	0.8322	Medium	6.18	6.24	0.214	3.896	0.7972	Medium	6.17	6.24	0.252	4.584	0.7736	Medium	6.17	6.24	0.615	11.201	0.8249	Medium	6.17
Apo_p110g	176	182	TRRGLVT	4.73	2	5	4.89	4.96	0.143	3.127	0.9519	Medium	4.89	4.96	0.143	3.128	0.9537	Medium	4.89	4.96	0.159	3.478	0.9076	Medium	4.89	4.96	0.199	4.346	0.914	Medium	4.89	4.96	0.223	4.871	0.9106	High	4.89	4.96	0.269	5.872	0.9463	High	4.9	4.96	0.598	13.07	0.9363	Medium	4.89
Apo_p110g	176	185	TRRGLVTPRM	6.49	2	7	6.62	6.7	0.158	2.469	0.9089	Medium	6.62	6.69	0.172	2.679	0.8983	Medium	6.62	6.69	0.167	2.606	0.9053	Medium	6.62	6.7	0.244	3.814	0.9178	Medium	6.62	6.7	0.228	3.553	0.9148	Medium	6.62	6.69	0.273	4.258	0.9124	Medium	6.62	6.69	0.67	10.462	0.9133	Medium	6.62
Apo_p110g	176	185	TRRGLVTPRM	6.49	3	7	6.4	6.92	0.159	2.484	0.9071	Medium	6.4	6.92	0.137	2.143	0.934	High	6.4	6.92	0.181	2.824	0.9004	High	6.4	6.92	0.217	3.386	0.9295	High	6.4	6.92	0.229	3.583	0.931	High	6.4	6.92	0.271	4.233	0.9298	High	6.4	6.92	0.616	9.62	0.9263	High	6.4
Apo_p110g	176	195	TRRGLVTPRMAEVASRDPKL	7.58	4	16	7.54	7.61	0.916	6.255	0.9021	High	7.55	7.61	0.936	6.392	0.9282	High	7.54	7.61	0.964	6.585	0.911	High	7.54	7.61	1.59	10.86	0.9119	Medium	7.54	7.61	1.511	10.323	0.9081	High	7.54	7.61	1.657	11.321	0.8994	High	7.54	7.61	3.016	20.598	0.8892	Medium	7.54
Apo_p110g	186	195	AEVASRDPKL	5.95	2	7	6.05	6.12	0.93	14.512	0.9454	High	6.05	6.12	0.898	14.021	0.9389	High	6.05	6.12	0.951	14.85	0.9277	High	6.05	6.12	1.545	24.129	0.9345	High	6.05	6.12	1.568	24.478	0.9312	High	6.05	6.12	1.584	24.735	0.9252	High	6.05	6.12	2.618	40.872	0.9455	High	6.05
Apo_p110g	188	195	VASRDPKL	5.26	2	5	5.3	5.38	0.95	20.776	0.9539	High	5.3	5.38	0.923	20.166	0.9609	High	5.3	5.38	0.945	20.654	0.9452	High	5.3	5.38	1.512	33.052	0.9423	High	5.3	5.38	1.52	33.227	0.9374	High	5.3	5.38	1.529	33.422	0.9186	High	5.3	5.38	2.214	48.402	0.954	High	5.3
Apo_p110g	196	211	YAMHPWVTSKPLPEYL	11.65	2	11	11.75	11.82	2.494	24.784	0.9134	High	11.75	11.82	2.456	24.402	0.9238	High	11.75	11.82	2.491	24.749	0.9145	High	11.75	11.82	3.498	34.75	0.8982	High	11.75	11.82	3.416	33.942	0.8964	High	11.75	11.82	3.436	34.141	0.8957	High	11.75	11.82	4.574	45.443	0.8986	High	11.75
Apo_p110g	196	211	YAMHPWVTSKPLPEYL	11.65	3	11	11.58	12.15	2.489	24.727	0.898	High	11.58	12.15	2.45	24.34	0.8932	High	11.58	12.15	2.485	24.694	0.884	High	11.58	12.15	3.457	34.35	0.8848	High	11.58	12.15	3.417	33.949	0.89	High	11.58	12.15	3.455	34.332	0.8903	High	11.58	12.15	4.561	45.315	0.8877	High	11.58
Apo_p110g	212	218	WKKIANN	5.03	1	5	5.03	5.1	2.046	44.712	0.806	Medium	5.03	5.1	2.063	45.09	0.7755	Medium	5.03	5.1	1.969	43.037	0.755	Medium	5.03	5.1	2.785	60.865	0.8208	Medium	5.03	5.1	2.691	58.826	0.8081	Medium	5.07	5.13	2.814	61.498	0.8103	Medium	5.04	5.1	3.365	73.561	0.808	Medium	5.03
Apo_p110g	212	221	WKKIANNCIF	10.39	1	8	10.43	10.5	1.449	19.79	0.8984	Medium	10.43	10.5	1.463	19.985	0.9009	Medium	10.43	10.5	1.483	20.257	0.9043	High	10.43	10.5	2.561	34.988	0.9014	High	10.43	10.5	2.485	33.951	0.9027	Medium	10.43	10.5	2.511	34.305	0.8981	Medium	10.43	10.5	3.784	51.688	0.8963	Medium	10.43
Apo_p110g	222	232	IVIHRSTTSQT	4.59	2	9	4.7	4.76	2.636	32.015	0.9494	High	4.7	4.76	2.553	31	0.9254	High	4.7	4.76	2.498	30.332	0.9349	High	4.7	4.76	2.702	32.817	0.9582	High	4.7	4.76	2.735	33.21	0.9479	High	4.7	4.76	2.723	33.061	0.9469	Medium	4.7	4.77	2.934	35.632	0.9237	High	4.7
Apo_p110g	222	245	IVIHRSTTSQTIKVSPDDTPGAIL	9.13	4	20	8.81	9.51	1.975	10.79	0.9102	High	8.81	9.51	1.907	10.419	0.9038	High	8.81	9.51	1.957	10.696	0.9041	High	8.81	9.51	2.75	15.028	0.9053	High	8.81	9.51	2.674	14.615	0.9049	High	8.81	9.51	2.776	15.171	0.9004	High	8.81	9.51	3.509	19.176	0.9028	High	8.81
Apo_p110g	223	233	VIHRSTTSQTI	4.58	3	9	4.69	4.76	2.621	31.829	0.9439	Medium	4.69	4.76	2.545	30.901	0.9382	Medium	4.69	4.76	2.571	31.223	0.9191	Medium	4.69	4.76	2.682	32.572	0.9464	High	4.69	4.76	2.737	33.238	0.9435	High	4.69	4.76	2.753	33.432	0.9454	High	4.7	4.77	2.969	36.048	0.9504	High	4.68
Apo_p110g	232	245	TIKVSPDDTPGAIL	10.16	2	10	10.09	10.15	1.098	12	0.8673	Medium	10.08	10.15	1.053	11.506	0.8685	Medium	10.08	10.15	1.102	12.043	0.8488	Medium	10.09	10.15	1.824	19.937	0.876	High	10.09	10.15	1.785	19.509	0.8802	High	10.09	10.15	1.795	19.62	0.8579	Medium	10.09	10.15	2.56	27.977	0.8603	Medium	10.09
Apo_p110g	233	245	IKVSPDDTPGAIL	9.99	1	9	10.04	10.12	0.771	9.36	0.9183	High	10.04	10.12	0.782	9.499	0.9086	Medium	10.04	10.12	0.806	9.791	0.9064	Medium	10.04	10.12	1.059	12.864	0.9072	High	10.05	10.12	1.007	12.234	0.9158	High	10.04	10.12	1.077	13.075	0.9059	Medium	10.04	10.12	1.776	21.566	0.8979	Medium	10.04
Apo_p110g	233	245	IKVSPDDTPGAIL	9.99	2	9	9.84	10.33	0.807	9.805	0.9201	High	9.84	10.33	0.768	9.332	0.9172	High	9.84	10.33	0.804	9.766	0.9119	Medium	9.84	10.33	1.102	13.376	0.9177	High	9.84	10.33	1.069	12.984	0.9175	High	9.84	10.33	1.1	13.353	0.9033	High	9.84	10.33	1.827	22.181	0.9128	High	9.84
Apo_p110g	248	269	FFTKMAKKKSLMDIPESQSEQD	8.24	3	19	8.15	8.22	7.395	42.535	0.902	Medium	8.15	8.21	7.36	42.333	0.8955	Medium	8.15	8.21	7.556	43.461	0.8851	Medium	8.15	8.21	8.084	46.503	0.9111	Medium	8.15	8.22	8.009	46.07	0.8947	Medium	8.15	8.21	8.325	47.888	0.8977	Medium	8.15	8.21	8.064	46.387	0.9054	Medium	8.15
Apo_p110g	249	269	FTKMAKKKSLMDIPESQSEQD	7.24	3	18	7.38	7.45	7.956	48.307	0.9367	High	7.37	7.45	7.765	47.147	0.9217	High	7.37	7.45	8.016	48.671	0.9332	High	7.38	7.45	8.508	51.66	0.9265	High	7.38	7.45	8.701	52.828	0.9122	High	7.37	7.45	8.817	53.532	0.9101	High	7.37	7.45	8.687	52.743	0.889	High	7.37
Apo_p110g	249	269	FTKMAKKKSLMDIPESQSEQD	7.24	4	18	7.29	7.35	8.131	49.366	0.9325	High	7.29	7.35	7.942	48.222	0.8903	High	7.29	7.35	8.173	49.624	0.9216	High	7.29	7.35	8.627	52.379	0.8946	High	7.29	7.35	8.641	52.463	0.9239	High	7.29	7.35	8.936	54.259	0.9013	High	7.29	7.35	8.82	53.553	0.9017	High	7.29
Apo_p110g	270	278	FVLRVCGRD	8.8	3	7	8.91	8.99	0.19	2.962	0.9033	High	8.91	8.99	0.221	3.451	0.9014	High	8.91	8.99	0.213	3.322	0.9012	High	8.91	8.99	0.295	4.607	0.9074	High	8.91	8.99	0.272	4.247	0.9014	High	8.91	8.99	0.337	5.258	0.902	High	8.91	8.99	0.625	9.762	0.9009	High	8.91
Apo_p110g	270	281	FVLRVCGRDEYL	11.08	3	10	11.12	11.19	0.145	1.582	0.9191	High	11.12	11.18	0.175	1.91	0.8852	High	11.12	11.18	0.199	2.172	0.8804	High	11.12	11.19	0.247	2.701	0.9112	High	11.12	11.19	0.237	2.588	0.917	High	11.12	11.18	0.278	3.04	0.8999	High	11.12	11.18	0.533	5.821	0.9271	High	11.12
Apo_p110g	282	291	VGETPIKNFQ	8	1	7	8.08	8.16	0.556	8.675	0.9222	High	8.08	8.15	0.564	8.81	0.9217	High	8.08	8.15	0.562	8.776	0.9268	High	8.08	8.16	0.579	9.035	0.9242	High	8.08	8.16	0.555	8.665	0.9239	High	8.08	8.16	0.623	9.722	0.925	High	8.08	8.16	0.625	9.761	0.9306	High	8.08
Apo_p110g	282	307	VGETPIKNFQWVRHCLKNGEEIHVVL	11.24	4	23	11.19	11.27	0.828	3.935	0.9191	High	11.19	11.27	0.849	4.035	0.912	High	11.19	11.27	0.967	4.596	0.9187	High	11.19	11.27	2.835	13.469	0.9111	High	11.2	11.27	2.697	12.815	0.9191	High	11.19	11.27	2.859	13.587	0.9105	High	11.19	11.27	3.599	17.103	0.9125	High	11.19
Apo_p110g	292	302	WVRHCLKNGEE	5.33	2	9	5.46	5.53	0.489	5.934	0.9276	High	5.46	5.53	0.476	5.781	0.9325	High	5.46	5.53	0.508	6.163	0.9246	High	5.46	5.53	1.641	19.931	0.9261	High	5.46	5.53	1.7	20.639	0.9311	High	5.46	5.53	1.687	20.484	0.9213	High	5.46	5.53	1.907	23.163	0.9283	High	5.46
Apo_p110g	292	307	WVRHCLKNGEEIHVVL	8.69	4	14	8.72	8.79	0.47	3.667	0.9379	High	8.72	8.79	0.571	4.457	0.9384	High	8.72	8.79	0.595	4.644	0.9262	High	8.72	8.79	1.889	14.748	0.9452	Medium	8.72	8.8	1.857	14.498	0.9336	Medium	8.72	8.79	2.002	15.626	0.9313	Medium	8.72	8.79	2.537	19.804	0.94	High	8.72
Apo_p110g	308	315	DTPPDPAL	8.37	1	3	8.41	8.48	0.455	16.582	0.8755	Medium	8.41	8.47	0.463	16.865	0.8825	Medium	8.41	8.47	0.497	18.111	0.8717	Medium	8.41	8.47	1.204	43.863	0.8693	Medium	8.41	8.48	1.186	43.22	0.8689	Medium	8.41	8.47	1.203	43.834	0.8642	Medium	8.41	8.47	1.509	54.958	0.8842	Medium	8.41
Apo_p110g	308	317	DTPPDPALDE	7.85	1	5	7.85	7.92	0.494	10.798	0.8204	Medium	7.85	7.93	0.531	11.603	0.8371	Medium	7.85	7.92	0.574	12.543	0.8215	Medium	7.85	7.92	1.111	24.274	0.8382	Medium	7.85	7.92	1.125	24.596	0.8567	Medium	7.85	7.92	1.199	26.207	0.8188	Medium	7.85	7.92	1.67	36.505	0.872	Medium	7.85
Apo_p110g	316	335	DEVRKEEWPLVDDCTGVTGY	12.39	2	17	12.58	12.65	6.096	39.189	0.9241	High	12.58	12.64	5.929	38.115	0.8959	Medium	12.58	12.64	6.068	39.007	0.8925	Medium	12.58	12.65	6.767	43.501	0.9138	High	12.58	12.65	6.574	42.263	0.9027	High	12.58	12.64	6.809	43.775	0.9111	Medium	12.58	12.64	7.552	48.55	0.9043	High	12.58
Apo_p110g	316	335	DEVRKEEWPLVDDCTGVTGY	12.39	3	17	12.55	12.62	6.112	39.291	0.9019	Medium	12.55	12.62	6.07	39.021	0.8843	Medium	12.55	12.62	6.087	39.134	0.886	Medium	12.55	12.62	6.832	43.92	0.899	Medium	12.55	12.62	6.642	42.7	0.8913	Medium	12.55	12.62	6.873	44.184	0.8978	Medium	12.55	12.62	7.611	48.927	0.8871	Medium	12.55
Apo_p110g	316	339	DEVRKEEWPLVDDCTGVTGYHEQL	11.9	2	21	11.91	11.98	7.453	38.789	0.8822	High	11.91	11.98	7.537	39.224	0.8526	High	11.91	11.98	7.402	38.521	0.88	High	11.91	11.98	8.259	42.98	0.8729	High	11.91	11.98	8.009	41.684	0.8734	High	11.91	11.98	8.353	43.469	0.8391	Medium	11.91	11.98	8.984	46.754	0.8731	High	11.91
Apo_p110g	317	335	EVRKEEWPLVDDCTGVTGY	12.3	3	16	12.31	12.38	5.394	36.844	0.8257	Medium	12.31	12.38	5.335	36.442	0.7966	Medium	12.31	12.38	5.297	36.183	0.8045	Medium	12.31	12.38	6.004	41.013	0.7971	Medium	12.31	12.38	5.824	39.782	0.8114	Medium	12.31	12.38	5.9	40.303	0.8027	Medium	12.31	12.38	6.732	45.982	0.7758	Medium	12.31
Apo_p110g	328	339	DCTGVTGYHEQL	8.95	1	10	8.87	8.94	5.208	56.92	0.7672	Medium	8.87	8.93	5.19	56.719	0.8359	Medium	8.87	8.94	5.177	56.58	0.7853	Medium	8.87	8.94	5.37	58.685	0.7475	Medium	8.87	8.94	5.289	57.804	0.774	Medium	8.87	8.94	5.482	59.91	0.77	Medium	8.81	8.88	5.437	59.423	0.7793	Medium	8.81
Apo_p110g	336	350	HEQLTIHGKDHESVF	7.4	2	13	7.55	7.62	3.719	31.265	0.9042	High	7.56	7.62	3.664	30.803	0.9262	High	7.55	7.62	3.772	31.71	0.9268	High	7.55	7.62	3.883	32.642	0.9008	High	7.55	7.62	3.954	33.237	0.9008	High	7.55	7.62	4.045	34.009	0.9074	High	7.55	7.62	3.982	33.474	0.9076	High	7.55
Apo_p110g	336	350	HEQLTIHGKDHESVF	7.4	3	13	7.53	7.6	3.712	31.21	0.9126	High	7.53	7.6	3.708	31.171	0.9232	High	7.53	7.6	3.797	31.922	0.9286	High	7.53	7.6	3.903	32.813	0.9294	High	7.53	7.6	3.983	33.481	0.929	High	7.53	7.6	4.088	34.37	0.9283	High	7.53	7.6	3.995	33.588	0.9361	High	7.53
Apo_p110g	340	350	TIHGKDHESVF	6.75	2	9	6.76	6.83	1.973	23.962	0.8996	High	6.76	6.83	1.92	23.317	0.8936	High	6.76	6.83	2.008	24.381	0.895	High	6.76	6.83	2.018	24.502	0.9136	High	6.76	6.83	2.129	25.85	0.9078	High	6.76	6.83	2.139	25.974	0.9016	High	6.76	6.83	2.123	25.785	0.9152	High	6.76
Apo_p110g	355	379	WDCDRKFRVKIRGIDIPVLPRNTDL	10.43	5	21	10.59	10.67	2.45	12.752	0.8945	Medium	10.59	10.67	2.445	12.724	0.8737	Medium	10.59	10.67	2.479	12.903	0.8782	Medium	10.59	10.67	3.443	17.917	0.9039	Medium	10.59	10.67	3.325	17.305	0.892	Medium	10.59	10.67	3.385	17.615	0.902	Medium	10.59	10.67	4.243	22.081	0.8985	Medium	10.59
Apo_p110g	362	379	RVKIRGIDIPVLPRNTDL	9.87	4	14	9.88	9.94	2.495	19.473	0.8195	Medium	9.87	9.94	2.544	19.86	0.7492	Medium	9.88	9.94	2.504	19.55	0.7666	Medium	9.88	9.94	3.293	25.705	0.7892	Medium	9.88	9.94	3.26	25.45	0.7913	Medium	9.88	9.94	3.235	25.257	0.7887	Medium	9.88	9.94	4.079	31.844	0.7923	Medium	9.88
Apo_p110g	370	379	IPVLPRNTDL	9.61	2	7	9.55	9.62	3.292	51.4	0.9186	Medium	9.55	9.61	3.176	49.581	0.9025	Medium	9.55	9.61	3.117	48.664	0.8688	Medium	9.55	9.62	3.984	62.196	0.9068	Medium	9.55	9.62	3.95	61.664	0.9003	Medium	9.55	9.62	4.012	62.64	0.8918	Medium	9.55	9.62	4.561	71.203	0.9009	Medium	9.55
Apo_p110g	370	381	IPVLPRNTDLTV	10.05	2	9	10.2	10.27	2.972	36.088	0.8898	Medium	10.2	10.27	2.88	34.968	0.9007	Medium	10.2	10.27	2.868	34.827	0.8975	Medium	10.2	10.27	4.063	49.34	0.8513	Medium	10.21	10.27	3.949	47.956	0.8717	Medium	10.2	10.27	4.005	48.63	0.8581	Medium	10.2	10.27	5.028	61.056	0.8484	Medium	10.2
Apo_p110g	382	394	FVEANIQHGQQVL	9.08	2	11	9.2	9.27	0.9	8.946	0.9225	High	9.2	9.27	0.881	8.756	0.9264	High	9.2	9.27	0.912	9.064	0.9373	High	9.2	9.27	1.64	16.29	0.9256	High	9.2	9.27	1.595	15.845	0.9385	High	9.2	9.27	1.685	16.737	0.9176	High	9.2	9.27	1.859	18.471	0.9333	High	9.2
Apo_p110g	383	394	VEANIQHGQQVL	7.88	2	10	7.91	7.99	0.951	10.392	0.9385	High	7.92	7.99	0.925	10.11	0.9381	High	7.91	7.99	0.991	10.834	0.9104	High	7.91	7.99	1.866	20.399	0.9355	High	7.91	7.99	1.855	20.27	0.9315	High	7.91	7.99	1.947	21.283	0.9297	High	7.91	7.99	2.146	23.449	0.9405	High	7.91
Apo_p110g	386	394	NIQHGQQVL	7.23	1	7	7.37	7.44	0.881	13.748	0.9038	Medium	7.37	7.44	0.875	13.656	0.9087	High	7.37	7.44	0.915	14.292	0.9138	High	7.37	7.44	1.791	27.961	0.8588	Medium	7.37	7.44	1.81	28.263	0.8834	High	7.37	7.44	1.801	28.126	0.8941	High	7.37	7.44	2.032	31.722	0.862	Medium	7.37
Apo_p110g	395	407	CQRRTSPKPFTEE	5.48	2	9	5.62	5.7	0.91	11.05	0.9347	High	5.62	5.7	0.85	10.327	0.9241	High	5.62	5.7	0.874	10.614	0.9446	High	5.62	5.7	1.536	18.656	0.9318	High	5.62	5.7	1.609	19.543	0.9303	High	5.62	5.7	1.606	19.504	0.9377	High	5.62	5.7	2.424	29.437	0.9304	High	5.62
Apo_p110g	395	407	CQRRTSPKPFTEE	5.48	3	9	5.63	5.7	0.893	10.839	0.9519	High	5.63	5.7	0.842	10.226	0.9563	High	5.63	5.71	0.855	10.383	0.9601	High	5.63	5.71	1.537	18.661	0.9491	High	5.63	5.71	1.597	19.398	0.947	High	5.63	5.7	1.584	19.239	0.9491	High	5.63	5.7	2.403	29.174	0.9611	High	5.63
Apo_p110g	417	428	SIKIKDLPKGAL	8.16	3	9	8.22	8.3	0.209	2.536	0.9508	High	8.22	8.3	0.224	2.715	0.9424	High	8.22	8.3	0.24	2.912	0.9388	High	8.22	8.3	0.669	8.122	0.9491	High	8.22	8.3	0.664	8.062	0.9346	High	8.22	8.3	0.78	9.478	0.9201	High	8.22	8.3	1.548	18.797	0.9368	High	8.22
Apo_p110g	417	431	SIKIKDLPKGALLNL	10.49	3	12	10.59	10.66	0.181	1.644	0.9482	Medium	10.59	10.66	0.23	2.096	0.9392	Medium	10.59	10.66	0.252	2.298	0.9244	Medium	10.59	10.66	0.651	5.932	0.9454	Medium	10.59	10.66	0.633	5.768	0.9553	Medium	10.59	10.66	0.738	6.72	0.9451	Medium	10.59	10.66	1.348	12.28	0.939	Medium	10.59
Apo_p110g	461	466	LYYVNL	12.24	1	4	12.19	12.26	0.042	1.142	0.8608	Medium	12.19	12.26	0.05	1.377	0.8099	Medium	12.19	12.26	0.069	1.89	0.8334	Medium	12.18	12.25	0.062	1.708	0.8682	Medium	12.19	12.26	0.039	1.074	0.85	Medium	12.19	12.26	0.086	2.359	0.8526	Medium	12.16	12.23	0.098	2.677	0.8461	Medium	12.19
Apo_p110g	463	468	YVNLLL	13.37	1	4	13.48	13.54	0.032	0.872	0.8836	Medium	13.47	13.54	0.054	1.467	0.8535	Medium	13.47	13.54	0.087	2.383	0.882	Medium	13.48	13.54	0.079	2.15	0.8651	Medium	13.48	13.54	0.074	2.012	0.8753	Medium	13.47	13.54	0.088	2.411	0.9026	Medium	13.48	13.54	0.36	9.838	0.8619	Medium	13.47
Apo_p110g	466	474	LLLIDHRFL	12.04	3	7	12.02	12.08	0.06	0.929	0.9036	Medium	12.01	12.08	0.095	1.489	0.8694	Medium	12.01	12.08	0.083	1.294	0.8523	Medium	12.02	12.08	0.229	3.575	0.8983	Medium	12.02	12.08	0.255	3.988	0.9134	Medium	12.01	12.08	0.237	3.708	0.8558	Medium	12.02	12.08	0.61	9.528	0.9303	Medium	12.01
Apo_p110g	467	475	LLIDHRFLL	12.02	3	7	12.07	12.13	0.046	0.721	0.9445	High	12.07	12.13	0.048	0.751	0.8892	Medium	12.06	12.13	0.06	0.936	0.9032	Medium	12.07	12.13	0.206	3.219	0.9364	Medium	12.07	12.13	0.224	3.502	0.9284	High	12.07	12.13	0.233	3.63	0.9208	Medium	12.07	12.13	0.63	9.829	0.9267	High	12.07
Apo_p110g	467	479	LLIDHRFLLRRGE	8.97	4	11	9.12	9.19	0.394	3.919	0.9481	High	9.12	9.19	0.406	4.037	0.9501	High	9.12	9.19	0.443	4.406	0.9266	High	9.12	9.19	1.308	12.992	0.9431	High	9.12	9.19	1.317	13.09	0.9449	High	9.12	9.19	1.408	13.985	0.9519	High	9.12	9.19	1.916	19.033	0.93	High	9.12
Apo_p110g	467	480	LLIDHRFLLRRGEY	9.61	4	12	9.58	9.65	0.411	3.742	0.9319	High	9.58	9.65	0.399	3.638	0.9182	High	9.58	9.65	0.418	3.803	0.928	High	9.58	9.65	1.269	11.558	0.9155	Medium	9.58	9.65	1.253	11.409	0.9144	High	9.58	9.65	1.316	11.986	0.9124	High	9.58	9.65	1.876	17.087	0.9092	Medium	9.58
Apo_p110g	468	480	LIDHRFLLRRGEY	8.49	2	11	8.54	8.61	0.418	4.156	0.8461	Medium	8.54	8.61	0.509	5.061	0.7698	Medium	8.54	8.61	0.492	4.887	0.7874	Medium	8.54	8.61	1.441	14.314	0.7591	Medium	8.54	8.61	1.352	13.435	0.7799	Medium	8.54	8.61	1.484	14.747	0.7929	Medium	8.54	8.61	1.985	19.719	0.7875	Medium	8.54
Apo_p110g	485	497	WQISGKGEDQGSF	9.72	2	11	9.84	9.91	5.511	54.758	0.8392	Medium	9.84	9.91	5.549	55.129	0.9107	High	9.84	9.91	5.581	55.453	0.916	High	9.84	9.91	5.795	57.571	0.9154	High	9.84	9.91	5.632	55.96	0.9072	High	9.84	9.91	5.698	56.607	0.9066	High	9.84	9.91	6.194	61.535	0.9003	High	9.84
Apo_p110g	498	513	NADKLTSATNPDKENS	5.22	2	13	5.2	5.28	2.202	18.509	0.8027	Medium	5.2	5.28	2.09	17.57	0.7758	Medium	5.2	5.28	2.129	17.899	0.8028	Medium	5.2	5.28	3.515	29.55	0.7901	Medium	5.2	5.28	3.486	29.304	0.7847	Medium	5.2	5.28	3.672	30.868	0.7993	Medium	5.21	5.28	4.707	39.569	0.8127	Medium	5.2
Apo_p110g	498	515	NADKLTSATNPDKENSMS	6	3	15	6.08	6.17	2.02	14.718	0.9222	High	6.08	6.17	1.97	14.355	0.9382	High	6.08	6.17	2.077	15.13	0.9297	High	6.08	6.17	3.688	26.872	0.9279	High	6.08	6.17	3.746	27.291	0.9283	High	6.08	6.17	3.835	27.939	0.9236	High	6.08	6.17	5.005	36.469	0.9364	High	6.15
Apo_p110g	500	515	DKLTSATNPDKENSMS	6.02	2	13	5.92	6	1.99	16.73	0.862	Medium	5.92	6	1.999	16.809	0.8322	Medium	5.92	6	1.975	16.604	0.8671	Medium	5.92	6	3.424	28.784	0.8282	Medium	5.92	6	3.444	28.957	0.8567	Medium	5.92	6	3.613	30.372	0.83	Medium	5.92	6	4.426	37.207	0.8172	Medium	5.92
Apo_p110g	514	519	MSISIL	12.49	1	4	12.54	12.6	0.052	1.433	0.8601	Medium	12.53	12.6	0.079	2.165	0.8052	Medium	12.53	12.6	0.067	1.838	0.8295	Medium	12.54	12.6	0.086	2.35	0.8187	Medium	12.54	12.6	0.046	1.262	0.8224	Medium	12.54	12.6	0.07	1.908	0.8159	Medium	12.54	12.6	0.051	1.38	0.8401	Medium	12.53
Apo_p110g	520	529	LDNYCHPIAL	10.65	2	7	10.73	10.8	2.018	31.501	0.814	Medium	10.73	10.8	2.093	32.671	0.7513	Medium	10.73	10.8	2.143	33.456	0.7855	Medium	10.73	10.8	3.175	49.57	0.762	Medium	10.7	10.77	3.108	48.518	0.7902	Medium	10.73	10.8	3.202	49.985	0.768	Medium	10.73	10.8	3.464	54.083	0.764	Medium	10.73
Apo_p110g	520	551	LDNYCHPIALPKHQPTPDPEGDRVRAEMPNQL	8.81	4	24	9.04	9.11	9.46	43.079	0.9305	High	9.04	9.11	9.443	43.003	0.9282	High	9.04	9.11	9.555	43.513	0.9326	High	9.04	9.11	11.014	50.156	0.93	High	9.04	9.11	10.934	49.792	0.9169	High	9.04	9.11	11.136	50.71	0.9268	High	9.04	9.11	11.265	51.298	0.9252	High	9.04
Apo_p110g	520	556	LDNYCHPIALPKHQPTPDPEGDRVRAEMPNQLRKQLE	8.61	5	29	8.61	8.69	10.33	38.928	0.8556	Medium	8.61	8.68	10.104	38.08	0.8252	Medium	8.61	8.68	10.502	39.578	0.8495	Medium	8.61	8.68	13.259	49.967	0.8129	Medium	8.61	8.69	13.26	49.97	0.8241	Medium	8.61	8.68	13.465	50.745	0.8565	Medium	8.61	8.68	14.318	53.959	0.8479	Medium	8.61
Apo_p110g	523	551	YCHPIALPKHQPTPDPEGDRVRAEMPNQL	8.37	5	21	8.53	8.59	8.632	44.922	0.8274	Medium	8.52	8.59	8.544	44.467	0.7968	Medium	8.52	8.59	8.641	44.969	0.8456	Medium	8.53	8.59	9.816	51.087	0.8161	Medium	8.53	8.59	9.772	50.856	0.837	Medium	8.52	8.59	10.075	52.431	0.8335	Medium	8.52	8.59	9.989	51.985	0.829	Medium	8.52
Apo_p110g	557	573	AIIATDPLNPLTAEDKE	10.7	2	13	10.84	10.91	3.211	26.996	0.9203	High	10.84	10.91	3.28	27.574	0.9094	High	10.84	10.91	3.42	28.749	0.9198	High	10.84	10.91	5.525	46.447	0.8916	Medium	10.84	10.91	5.495	46.192	0.9154	High	10.84	10.91	5.725	48.128	0.9138	High	10.84	10.91	7.428	62.446	0.908	High	10.84
Apo_p110g	557	578	AIIATDPLNPLTAEDKELLWHF	13.73	3	18	13.79	13.87	2.211	13.424	0.7499	Medium	13.79	13.87	1.986	12.057	0.7208	Medium	13.79	13.87	2.102	12.764	0.7117	Medium	13.79	13.87	6.198	37.635	0.7899	Medium	13.8	13.87	6.218	37.756	0.811	Medium	13.79	13.87	6.292	38.205	0.7401	Medium	13.79	13.87	9.604	58.311	0.8171	Medium	13.79
Apo_p110g	557	580	AIIATDPLNPLTAEDKELLWHFRY	12.83	4	20	12.91	12.98	2.08	11.368	0.743	Medium	12.9	12.98	2.08	11.368	0.7343	Medium	12.9	12.98	2.118	11.575	0.7252	Medium	12.91	12.98	7.534	41.169	0.7218	Medium	12.91	12.98	7.258	39.659	0.7127	Medium	12.9	12.98	7.296	39.869	0.726	Medium	12.9	12.98	10.687	58.4	0.7017	Medium	12.9
Apo_p110g	558	569	IIATDPLNPLTA	11.53	1	8	11.6	11.66	2.523	34.468	0.8789	Medium	11.6	11.66	2.581	35.264	0.8452	Medium	11.6	11.66	2.665	36.408	0.8025	Medium	11.6	11.66	4.442	60.689	0.8464	Medium	11.6	11.67	4.336	59.231	0.8282	Medium	11.6	11.66	4.491	61.356	0.8126	Medium	11.6	11.66	5.508	75.242	0.8663	High	11.6
Apo_p110g	558	570	IIATDPLNPLTAE	11.44	1	9	11.54	11.61	2.707	32.869	0.811	Medium	11.54	11.61	2.682	32.571	0.7683	Medium	11.54	11.61	2.797	33.964	0.7309	Medium	11.54	11.61	4.552	55.273	0.836	Medium	11.54	11.61	4.608	55.95	0.8358	Medium	11.54	11.61	4.715	57.254	0.7841	Medium	11.54	11.61	5.724	69.514	0.8686	Medium	11.54
Apo_p110g	558	571	IIATDPLNPLTAED	11.47	1	10	11.52	11.59	2.676	29.25	0.8	Medium	11.52	11.59	2.874	31.413	0.7734	Medium	11.52	11.59	2.822	30.844	0.7137	Medium	11.52	11.59	4.648	50.801	0.8291	Medium	11.52	11.59	4.633	50.633	0.8061	Medium	11.52	11.59	4.771	52.143	0.776	Medium	11.52	11.59	5.949	65.019	0.8274	Medium	11.52
Apo_p110g	558	573	IIATDPLNPLTAEDKE	10.38	2	12	10.51	10.59	2.752	25.061	0.772	Medium	10.51	10.59	2.885	26.276	0.7776	Medium	10.55	10.62	2.971	27.055	0.7441	Medium	10.51	10.59	5.351	48.734	0.8309	Medium	10.52	10.59	5.261	47.912	0.8231	Medium	10.51	10.59	5.406	49.232	0.7979	Medium	10.51	10.59	6.947	63.269	0.8275	Medium	10.51
Apo_p110g	558	578	IIATDPLNPLTAEDKELLWHF	13.68	3	17	13.82	13.9	2.979	19.154	0.9138	Medium	13.82	13.89	3.057	19.653	0.9078	Medium	13.82	13.89	3.18	20.443	0.9031	Medium	13.82	13.9	5.756	37.003	0.9066	Medium	13.82	13.9	5.616	36.103	0.9028	Medium	13.82	13.89	5.853	37.628	0.8425	Medium	13.82	13.89	8.488	54.568	0.9054	Medium	13.82
Apo_p110g	574	578	LLWHF	13.11	1	3	13.16	13.22	0.195	7.103	0.88	Medium	13.16	13.22	0.232	8.455	0.8056	Medium	13.2	13.27	0.244	8.889	0.8105	Medium	13.16	13.22	0.716	26.08	0.834	Medium	13.16	13.23	0.672	24.49	0.8481	Medium	13.16	13.22	0.702	25.582	0.8005	Medium	13.16	13.22	1.242	45.264	0.8652	Medium	13.16
Apo_p110g	574	592	LLWHFRYESLKHPKAYPKL	9.63	4	15	9.45	9.52	0.972	7.083	0.8759	Medium	9.45	9.52	1.019	7.423	0.8686	Medium	9.49	9.56	1.067	7.774	0.8253	Medium	9.45	9.52	3.236	23.578	0.8351	Medium	9.45	9.53	3.076	22.414	0.8196	Medium	9.45	9.52	3.416	24.89	0.8328	Medium	9.45	9.52	4.608	33.571	0.8744	Medium	9.45
Apo_p110g	579	592	RYESLKHPKAYPKL	6.32	4	10	6.29	6.36	1.227	13.413	0.8865	Medium	6.29	6.36	1.217	13.299	0.9082	Medium	6.33	6.4	1.318	14.404	0.9191	Medium	6.23	6.29	3.075	33.602	0.9067	Medium	6.29	6.36	3.093	33.806	0.878	Medium	6.33	6.42	3.226	35.256	0.9023	Medium	6.29	6.36	4.62	50.487	0.8832	Medium	6.29
Apo_p110g	593	601	FSSVKWGQQ	8.81	1	7	8.89	8.96	1.215	18.964	0.9016	High	8.89	8.96	1.222	19.085	0.8988	High	8.9	8.97	1.257	19.619	0.885	Medium	8.85	8.92	3.353	52.342	0.8816	Medium	8.9	8.96	3.287	51.315	0.8872	Medium	8.99	9.05	3.489	54.471	0.804	Medium	8.89	8.96	4.761	74.337	0.8676	Medium	8.89
Apo_p110g	593	607	FSSVKWGQQEIVAKT	9.12	3	13	9.15	9.23	1.182	9.939	0.8455	Medium	9.22	9.3	1.21	10.17	0.847	Medium	9.15	9.23	1.268	10.663	0.8205	Medium	9.15	9.23	5.399	45.392	0.9162	High	9.16	9.23	5.459	45.893	0.9155	High	9.25	9.32	5.531	46.501	0.8752	Medium	9.15	9.23	8.338	70.101	0.9366	High	9.15
Apo_p110g	602	607	EIVAKT	4.54	1	4	4.67	4.74	0.469	12.817	0.9413	Medium	4.67	4.74	0.444	12.143	0.9268	Medium	4.67	4.74	0.537	14.673	0.9505	Medium	4.67	4.74	1.51	41.265	0.9101	Medium	4.67	4.74	1.479	40.421	0.9354	Medium	4.72	4.8	1.584	43.268	0.9379	Medium	4.68	4.74	2.764	75.506	0.9215	Medium	4.67
Apo_p110g	606	611	KTYQLL	9.74	2	4	9.86	9.94	0.528	14.434	0.9028	High	9.84	9.92	0.525	14.347	0.9226	High	9.84	9.92	0.556	15.201	0.911	High	9.84	9.92	1.475	40.289	0.9242	Medium	9.84	9.92	1.445	39.483	0.9213	High	9.87	9.93	1.526	41.706	0.9323	High	9.84	9.92	2.721	74.344	0.9335	High	9.84
Apo_p110g	611	622	LARREVWDQSAL	9.4	2	10	9.45	9.52	5.016	54.815	0.9036	High	9.46	9.52	4.922	53.795	0.8863	High	9.45	9.52	5.017	54.834	0.9116	High	9.45	9.52	5.434	59.387	0.8827	High	9.45	9.53	5.434	59.389	0.893	High	9.45	9.52	5.468	59.756	0.9027	High	9.45	9.52	5.386	58.866	0.8958	High	9.45
Apo_p110g	612	622	ARREVWDQSAL	9.08	3	9	9.12	9.19	4.914	59.677	0.8696	Medium	9.12	9.19	4.811	58.417	0.8681	Medium	9.12	9.19	4.9	59.504	0.8428	Medium	9.12	9.19	5.095	61.874	0.9088	High	9.12	9.19	5.085	61.752	0.8858	High	9.12	9.19	5.152	62.564	0.8737	Medium	9.12	9.19	5.036	61.148	0.9125	High	9.12
Apo_p110g	623	630	DVGLTMQL	11.91	1	6	12.09	12.17	0.496	9.038	0.89	Medium	12.09	12.17	0.576	10.498	0.8817	Medium	12.14	12.21	0.602	10.972	0.8062	Medium	12.01	12.11	1.817	33.089	0.9079	Medium	11.98	12.13	1.846	33.617	0.9109	Medium	12.11	12.17	1.998	36.387	0.8203	Medium	12.09	12.17	3.142	57.227	0.8908	Medium	12.09
Apo_p110g	631	635	LDCNF	10.64	1	3	10.77	10.84	0.326	11.882	0.9049	Medium	10.76	10.84	0.323	11.77	0.8949	Medium	10.76	10.84	0.371	13.529	0.8896	Medium	10.77	10.84	0.859	31.29	0.9278	Medium	10.77	10.84	0.842	30.66	0.9206	Medium	10.76	10.84	0.9	32.797	0.9181	Medium	10.76	10.84	1.496	54.482	0.9258	Medium	10.76
Apo_p110g	636	642	SDENVRA	4.34	1	5	4.43	4.5	0.599	13.095	0.9057	High	4.43	4.49	0.626	13.687	0.9311	High	4.43	4.5	0.628	13.716	0.944	High	4.43	4.5	1.113	24.32	0.9423	High	4.43	4.5	1.125	24.579	0.9275	High	4.49	4.56	1.213	26.516	0.9139	High	4.44	4.49	1.951	42.649	0.909	High	4.43
Apo_p110g	643	654	IAVQKLESLEDD	9.34	2	10	9.21	9.56	1.297	14.174	0.8492	Medium	9.2	9.56	1.283	14.024	0.8614	Medium	9.2	9.56	1.277	13.954	0.8401	Medium	9.2	9.56	2.023	22.107	0.8373	Medium	9.21	9.56	1.966	21.491	0.8512	Medium	9.2	9.56	1.997	21.829	0.8297	Medium	9.2	9.56	2.627	28.712	0.819	Medium	9.2
Apo_p110g	643	657	IAVQKLESLEDDDVL	11.41	2	13	11.34	11.41	1.18	9.922	0.8727	Medium	11.34	11.41	1.187	9.978	0.8619	Medium	11.33	11.41	1.26	10.592	0.863	Medium	11.34	11.41	1.868	15.705	0.8534	Medium	11.34	11.41	1.798	15.114	0.8571	Medium	11.34	11.41	1.986	16.694	0.8605	Medium	11.34	11.41	2.674	22.48	0.8319	Medium	11.34
Apo_p110g	643	662	IAVQKLESLEDDDVLHYLLQ	13.49	3	18	13.51	13.58	0.774	4.697	0.8736	Medium	13.51	13.58	0.807	4.903	0.8729	Medium	13.51	13.58	0.822	4.989	0.8771	Medium	13.51	13.58	1.477	8.967	0.8371	Medium	13.51	13.59	1.417	8.601	0.8451	Medium	13.51	13.58	1.556	9.447	0.8592	Medium	13.51	13.58	2.709	16.45	0.8004	Medium	13.51
Apo_p110g	643	663	IAVQKLESLEDDDVLHYLLQL	14.1	3	19	14.13	14.2	0.68	3.913	0.8794	Medium	14.13	14.2	0.686	3.947	0.8756	Medium	14.13	14.2	0.728	4.185	0.8824	Medium	14.13	14.2	1.389	7.992	0.8622	Medium	14.13	14.2	1.331	7.657	0.863	Medium	14.13	14.2	1.463	8.413	0.8665	Medium	14.13	14.2	2.784	16.015	0.8406	Medium	14.13
Apo_p110g	654	662	DDVLHYLLQ	12.91	2	7	13.02	13.09	0.094	1.464	0.9038	Medium	13.02	13.09	0.046	0.719	0.8901	Medium	13.02	13.09	0.056	0.877	0.895	Medium	13.02	13.09	0.275	4.288	0.9014	Medium	13.02	13.09	0.18	2.808	0.9094	Medium	13.02	13.09	0.211	3.292	0.9016	Medium	13.02	13.09	1.017	15.881	0.8799	Medium	13.02
Apo_p110g	658	663	HYLLQL	11.93	1	4	11.82	11.9	0.059	1.601	0.9012	Medium	11.82	11.9	0.038	1.049	0.9264	Medium	11.82	11.9	0.023	0.625	0.9069	Medium	11.82	11.9	0.102	2.775	0.9328	Medium	11.82	11.9	0.1	2.729	0.9335	Medium	11.82	11.9	0.118	3.232	0.9314	Medium	11.82	11.9	0.521	14.236	0.9268	Medium	11.82
Apo_p110g	663	677	LVQAVKFEPYHDSAL	9.66	3	12	9.77	9.84	0.267	2.429	0.9465	High	9.77	9.84	0.285	2.594	0.9377	High	9.77	9.84	0.313	2.852	0.9391	High	9.77	9.84	0.666	6.07	0.9395	High	9.77	9.84	0.631	5.75	0.9342	High	9.77	9.84	0.699	6.369	0.9179	High	9.77	9.84	0.78	7.1	0.935	High	9.77
Apo_p110g	664	677	VQAVKFEPYHDSAL	9.29	3	11	9.31	9.39	0.266	2.645	0.9278	High	9.31	9.39	0.272	2.703	0.9193	High	9.31	9.39	0.299	2.97	0.927	High	9.31	9.39	0.668	6.633	0.9182	High	9.32	9.39	0.642	6.377	0.9082	High	9.31	9.39	0.69	6.859	0.9035	High	9.31	9.39	0.807	8.021	0.9124	High	9.31
Apo_p110g	666	677	AVKFEPYHDSAL	8.87	2	9	8.97	9.04	0.267	3.237	0.9054	High	8.97	9.04	0.28	3.397	0.9087	High	8.97	9.04	0.311	3.776	0.8946	Medium	8.97	9.04	0.714	8.671	0.901	High	8.97	9.04	0.691	8.397	0.9091	High	8.97	9.04	0.704	8.546	0.9037	Medium	8.97	9.04	0.827	10.045	0.9034	High	8.97
Apo_p110g	666	677	AVKFEPYHDSAL	8.87	3	9	9.05	9.13	0.263	3.19	0.9432	High	9.05	9.13	0.258	3.129	0.9344	High	9.05	9.13	0.298	3.615	0.9466	High	9.05	9.13	0.669	8.127	0.9174	High	9.06	9.13	0.638	7.752	0.9368	High	9.05	9.13	0.686	8.331	0.9315	High	9.05	9.13	0.8	9.717	0.9239	High	9.05
Apo_p110g	681	697	LLKRGLRNKRIGHFLFW	10.27	4	15	10.29	10.35	0.082	0.6	0.9267	High	10.29	10.35	0.055	0.403	0.9439	High	10.29	10.35	0.069	0.502	0.9378	High	10.29	10.35	0.057	0.413	0.9147	Medium	10.29	10.36	0.069	0.502	0.9241	High	10.29	10.35	0.086	0.626	0.9165	High	10.29	10.35	0.081	0.589	0.9008	High	10.29
Apo_p110g	681	697	LLKRGLRNKRIGHFLFW	10.27	5	15	10.17	10.71	0.027	0.194	0.9531	High	10.17	10.71	0.032	0.231	0.9519	High	10.17	10.71	0.041	0.299	0.9497	High	10.17	10.71	0.044	0.32	0.9473	High	10.17	10.71	0.039	0.287	0.9424	High	10.17	10.71	0.042	0.308	0.9436	High	10.17	10.71	0.059	0.428	0.9445	High	10.17
Apo_p110g	697	713	WFLRSEIAQSRHYQQRF	9.66	4	15	9.75	9.82	0.372	2.708	0.9466	High	9.75	9.82	0.399	2.904	0.9372	High	9.75	9.82	0.375	2.729	0.9333	High	9.75	9.82	0.665	4.849	0.9329	High	9.75	9.82	0.622	4.529	0.934	High	9.75	9.82	0.647	4.713	0.9301	High	9.75	9.82	1.639	11.944	0.9258	High	9.75
Apo_p110g	698	713	FLRSEIAQSRHYQQRF	7.78	4	14	7.68	7.75	0.504	3.938	0.8689	Medium	7.68	7.75	0.488	3.807	0.8751	Medium	7.68	7.75	0.512	3.996	0.8806	Medium	7.68	7.75	0.797	6.222	0.8777	Medium	7.68	7.75	0.828	6.463	0.8727	Medium	7.68	7.75	0.877	6.85	0.869	Medium	7.68	7.75	1.991	15.543	0.8974	Medium	7.68
Apo_p110g	700	713	RSEIAQSRHYQQRF	5.79	4	12	5.82	5.89	0.425	3.868	0.9535	High	5.82	5.89	0.421	3.834	0.9497	High	5.82	5.89	0.434	3.95	0.9547	High	5.82	5.89	0.668	6.08	0.9585	High	5.82	5.89	0.729	6.635	0.957	High	5.82	5.89	0.759	6.91	0.9453	High	5.82	5.89	1.749	15.926	0.9535	High	5.82
Apo_p110g	714	718	AVILE	8.53	1	3	8.61	8.69	0.136	4.949	0.8326	Medium	8.59	8.66	0.11	4.002	0.7788	Medium	8.59	8.66	0.094	3.419	0.8327	Medium	8.6	8.67	0.03	1.088	0.8377	Medium	8.59	8.66	0.025	0.924	0.8408	Medium	8.59	8.66	0.033	1.219	0.8552	Medium	8.6	8.67	0.023	0.84	0.841	Medium	8.59
Apo_p110g	714	719	AVILEA	9.39	1	4	9.24	9.31	0.029	0.802	0.9006	Medium	9.24	9.3	0.016	0.45	0.9032	Medium	9.24	9.3	0.019	0.516	0.9243	Medium	9.24	9.31	0.022	0.6	0.8691	Medium	9.24	9.31	0.02	0.537	0.9055	Medium	9.24	9.3	0.021	0.563	0.9029	Medium	9.24	9.3	0.017	0.456	0.8846	Medium	9.24
Apo_p110g	720	729	YLRGCGTAML	9.99	2	8	10.19	10.25	0.131	1.79	0.9405	High	10.19	10.25	0.162	2.215	0.9103	High	10.19	10.25	0.174	2.382	0.9193	High	10.19	10.25	0.524	7.153	0.9457	High	10.19	10.26	0.524	7.152	0.9419	High	10.19	10.25	0.515	7.039	0.9401	High	10.19	10.25	1.054	14.397	0.9418	High	10.19
Apo_p110g	720	731	YLRGCGTAMLHD	8.49	3	10	8.48	8.55	0.178	1.943	0.751	Medium	8.48	8.55	0.16	1.752	0.7863	Medium	8.48	8.55	0.241	2.639	0.8056	Medium	8.48	8.55	0.605	6.61	0.7632	Medium	8.48	8.55	0.582	6.365	0.771	Medium	8.48	8.55	0.616	6.735	0.8143	Medium	8.48	8.55	1.244	13.6	0.7348	Medium	8.48
Apo_p110g	730	737	HDFTQQVQ	6.36	2	6	6.33	6.39	0.057	1.031	0.9193	Medium	6.32	6.39	0.057	1.034	0.909	Medium	6.33	6.39	0.063	1.154	0.8909	Medium	6.33	6.39	0.088	1.601	0.9103	Medium	6.33	6.39	0.06	1.092	0.8952	Medium	6.33	6.39	0.069	1.26	0.8849	Medium	6.33	6.39	0.072	1.313	0.8833	Medium	6.33
Apo_p110g	730	738	HDFTQQVQV	8.32	1	7	8.3	8.37	0.1	1.563	0.8308	Medium	8.3	8.36	0.075	1.174	0.8588	Medium	8.3	8.36	0.086	1.341	0.8288	Medium	8.3	8.37	0.054	0.842	0.8189	Medium	8.3	8.37	0.078	1.212	0.8348	Medium	8.3	8.37	0.074	1.148	0.8101	Medium	8.3	8.36	0.118	1.849	0.7993	Medium	8.3
Apo_p110g	732	737	FTQQVQ	5.63	1	4	5.55	5.61	0.026	0.709	0.8041	Medium	5.61	5.68	0.06	1.65	0.851	Medium	5.55	5.61	0.101	2.753	0.7689	Medium	5.55	5.61	0.058	1.572	0.858	Medium	5.55	5.61	0.079	2.166	0.8167	Medium	5.54	5.61	0.079	2.147	0.7585	Medium	5.54	5.61	0.037	1.014	0.8458	Medium	5.57
Apo_p110g	748	767	DIKSLSAEKYDVSSQVISQL	11.14	3	18	11.04	11.12	11.768	71.449	0.929	High	11.04	11.12	11.654	70.758	0.8898	High	11.04	11.12	11.767	71.443	0.9055	High	11.04	11.12	11.836	71.862	0.9226	High	11.04	11.12	11.778	71.511	0.915	High	11.04	11.12	11.861	72.015	0.9137	High	11.04	11.12	11.755	71.373	0.914	High	11.04
Apo_p110g	748	782	DIKSLSAEKYDVSSQVISQLKQKLENLQNSQLPES	12.49	5	32	12.44	12.51	14.886	50.841	0.9213	High	12.43	12.51	14.802	50.554	0.8976	High	12.43	12.51	14.984	51.176	0.9072	High	12.44	12.51	19.913	68.008	0.9118	High	12.49	12.56	19.588	66.898	0.8901	High	12.43	12.51	19.73	67.383	0.9131	High	12.43	12.51	21.29	72.712	0.867	High	12.43
Apo_p110g	755	782	EKYDVSSQVISQLKQKLENLQNSQLPES	12.1	3	25	12.18	12.26	10.577	46.238	0.8637	Medium	12.18	12.26	10.392	45.428	0.8353	Medium	12.18	12.26	10.598	46.329	0.844	Medium	12.18	12.26	15.565	68.045	0.8324	Medium	12.19	12.26	15.425	67.43	0.8386	Medium	12.18	12.26	15.488	67.706	0.8566	Medium	12.18	12.26	17.087	74.697	0.8371	Medium	12.18
Apo_p110g	755	782	EKYDVSSQVISQLKQKLENLQNSQLPES	12.1	4	25	12.02	12.47	10.641	46.518	0.873	Medium	12.02	12.47	10.559	46.158	0.8467	Medium	12.02	12.47	10.694	46.751	0.8516	Medium	12.02	12.47	15.522	67.856	0.8531	Medium	12.03	12.47	15.419	67.404	0.8446	Medium	12.02	12.47	15.394	67.295	0.8419	Medium	12.02	12.47	17.04	74.492	0.8537	Medium	12.02
Apo_p110g	762	782	QVISQLKQKLENLQNSQLPES	10.58	2	18	10.51	10.57	7.08	42.987	0.8748	Medium	10.5	10.57	7.015	42.594	0.8862	Medium	10.5	10.57	7.141	43.361	0.8591	Medium	10.51	10.57	11.851	71.953	0.8799	High	10.51	10.57	11.812	71.721	0.8691	Medium	10.5	10.57	11.815	71.733	0.8456	Medium	10.51	10.57	13.398	81.347	0.887	Medium	10.5
Apo_p110g	767	782	LKQKLENLQNSQLPES	7.48	2	13	7.43	7.5	3.805	31.989	0.8617	Medium	7.43	7.5	3.783	31.806	0.8399	Medium	7.43	7.5	3.848	32.348	0.7963	Medium	7.43	7.5	6.898	57.99	0.8505	Medium	7.44	7.5	7.014	58.968	0.8691	Medium	7.43	7.5	7.051	59.276	0.8457	Medium	7.43	7.5	8.572	72.061	0.8873	Medium	7.43
Apo_p110g	768	782	KQKLENLQNSQLPES	7.13	2	12	7.13	7.2	3.698	33.683	0.9388	High	7.13	7.2	3.605	32.837	0.9337	High	7.13	7.2	3.712	33.81	0.9086	High	7.13	7.2	6.517	59.358	0.937	High	7.13	7.2	6.585	59.972	0.9105	High	7.13	7.2	6.61	60.2	0.926	High	7.13	7.2	8.056	73.374	0.9238	High	7.13
Apo_p110g	783	796	FRVPYDPGLKAGAL	10.16	3	10	10.18	10.25	0.216	2.356	0.8796	High	10.18	10.25	0.213	2.331	0.8747	High	10.18	10.25	0.262	2.859	0.847	Medium	10.18	10.25	0.396	4.333	0.9004	High	10.18	10.26	0.373	4.078	0.8971	High	10.18	10.25	0.431	4.715	0.8961	High	10.18	10.25	1.497	16.364	0.8998	High	10.18
Apo_p110g	797	812	AIEKCKVMASKKKPLW	6.81	4	13	6.96	7.03	1.796	15.1	0.9475	High	6.95	7.03	1.76	14.799	0.9457	High	6.95	7.03	1.824	15.332	0.9487	High	6.96	7.03	2.329	19.58	0.9371	High	6.96	7.03	2.439	20.506	0.9413	High	6.95	7.03	2.435	20.467	0.94	High	6.95	7.03	3.67	30.851	0.9402	High	6.95
Apo_p110g	797	813	AIEKCKVMASKKKPLWL	8.29	2	14	8.12	8.2	1.621	12.654	0.9003	High	8.12	8.2	1.611	12.575	0.9018	High	8.12	8.2	1.623	12.673	0.8641	High	8.12	8.2	2.225	17.371	0.895	High	8.12	8.2	2.131	16.636	0.8984	High	8.12	8.2	2.269	17.71	0.8973	High	8.12	8.2	3.362	26.242	0.9058	High	8.12
Apo_p110g	797	815	AIEKCKVMASKKKPLWLEF	10.46	4	16	10.38	10.46	1.225	8.366	0.9232	High	10.38	10.45	1.214	8.291	0.9285	High	10.38	10.45	1.199	8.193	0.9223	High	10.38	10.46	1.677	11.457	0.9262	High	10.38	10.46	1.613	11.015	0.9246	High	10.38	10.45	1.665	11.37	0.9211	High	10.38	10.45	2.546	17.39	0.9271	High	10.38
Apo_p110g	800	812	KCKVMASKKKPLW	6.04	2	10	6.07	6.13	1.459	15.945	0.88	Medium	6.08	6.15	1.361	14.87	0.8661	Medium	6.07	6.13	1.467	16.03	0.8548	Medium	6.07	6.13	1.902	20.782	0.8903	Medium	6.07	6.13	1.961	21.427	0.8871	Medium	6.07	6.13	1.971	21.542	0.8608	Medium	6.06	6.13	2.975	32.51	0.8745	Medium	6.06
Apo_p110g	802	815	KVMASKKKPLWLEF	10.71	4	11	10.84	10.91	0.665	6.611	0.9336	High	10.84	10.91	0.686	6.813	0.9036	High	10.84	10.91	0.669	6.643	0.9023	High	10.84	10.91	0.978	9.717	0.9395	Medium	10.84	10.91	0.968	9.62	0.9304	Medium	10.84	10.91	0.982	9.754	0.9251	Medium	10.84	10.91	1.263	12.545	0.9332	Medium	10.84
Apo_p110g	814	823	EFKCADPTAL	9.48	1	7	9.47	9.55	1.073	16.749	0.7986	Medium	9.47	9.55	1.05	16.396	0.8268	Medium	9.47	9.55	1.098	17.146	0.796	Medium	9.41	9.48	3.036	47.404	0.7578	Medium	9.47	9.55	2.91	45.438	0.7858	Medium	9.47	9.55	3.005	46.915	0.7619	Medium	9.47	9.55	3.845	60.024	0.7421	Medium	9.47
Apo_p110g	814	842	EFKCADPTALSNETIGIIFKHGDDLRQDM	12.57	4	26	12.57	12.65	3.427	14.404	0.8688	Medium	12.57	12.64	3.366	14.147	0.8434	Medium	12.57	12.64	3.435	14.438	0.8567	Medium	12.57	12.65	6.613	27.796	0.857	Medium	12.57	12.65	6.47	27.196	0.8412	Medium	12.57	12.64	6.576	27.641	0.8194	Medium	12.57	12.64	8.604	36.168	0.8653	Medium	12.57
Apo_p110g	816	823	KCADPTAL	7	1	5	6.93	7.01	0.893	19.517	0.9137	High	6.93	7	0.876	19.155	0.853	Medium	6.93	7	0.926	20.249	0.8922	Medium	6.93	7.01	2.437	53.27	0.904	High	6.93	7.01	2.432	53.158	0.8633	High	6.93	7.01	2.466	53.904	0.8836	Medium	6.93	7.01	3.296	72.045	0.8894	High	6.93
Apo_p110g	816	825	KCADPTALSN	5.74	2	7	5.68	5.77	2.233	34.869	0.9396	Medium	5.68	5.77	2.173	33.928	0.9391	Medium	5.68	5.77	2.198	34.312	0.9378	Medium	5.68	5.77	3.756	58.648	0.9309	Medium	5.68	5.77	3.854	60.164	0.9128	Medium	5.68	5.77	3.854	60.174	0.9087	Medium	5.68	5.77	4.638	72.417	0.9211	Medium	5.68
Apo_p110g	816	838	KCADPTALSNETIGIIFKHGDDL	12.14	3	20	12.38	12.45	1.564	8.549	0.8337	Medium	12.38	12.45	1.533	8.379	0.8307	Medium	12.38	12.45	1.597	8.725	0.8566	Medium	12.38	12.45	2.699	14.751	0.7859	Medium	12.39	12.45	2.559	13.981	0.7805	Medium	12.38	12.45	2.91	15.901	0.8015	Medium	12.38	12.45	4.682	25.587	0.7538	Medium	12.38
Apo_p110g	816	842	KCADPTALSNETIGIIFKHGDDLRQDM	11.89	5	24	11.91	11.98	3.164	14.407	0.9441	High	11.91	11.98	3.239	14.751	0.9431	High	11.91	11.98	3.298	15.02	0.9375	High	11.91	11.98	6.094	27.752	0.9258	High	11.91	11.98	5.922	26.966	0.9275	High	11.91	11.98	6.041	27.509	0.9369	High	11.91	11.98	7.835	35.68	0.9199	High	11.91
Apo_p110g	816	843	KCADPTALSNETIGIIFKHGDDLRQDML	12.47	4	25	12.6	12.67	3.008	13.149	0.864	Medium	12.6	12.67	2.978	13.02	0.8416	Medium	12.6	12.67	3.05	13.333	0.8427	Medium	12.57	12.64	5.839	25.525	0.7924	Medium	12.57	12.64	5.712	24.969	0.7996	Medium	12.6	12.67	5.722	25.013	0.8065	Medium	12.6	12.67	7.648	33.435	0.7586	Medium	12.6
Apo_p110g	824	829	SNETIG	5.53	1	4	5.52	5.76	1.141	31.184	0.8621	Medium	5.52	5.75	1.106	30.222	0.8381	Medium	5.52	5.76	1.101	30.081	0.8455	Medium	5.52	5.76	1.73	47.273	0.8518	Medium	5.52	5.76	1.787	48.813	0.8559	Medium	5.52	5.75	1.79	48.9	0.8412	Medium	5.52	5.75	2.037	55.648	0.8527	Medium	5.52
Apo_p110g	824	842	SNETIGIIFKHGDDLRQDM	10.75	4	17	10.77	10.86	0.559	3.592	0.9371	High	10.77	10.86	0.645	4.148	0.9307	High	10.77	10.86	0.635	4.082	0.918	High	10.77	10.86	2.024	13.009	0.9336	High	10.78	10.86	1.954	12.561	0.9298	High	10.77	10.86	1.967	12.647	0.9291	High	10.77	10.86	3.187	20.487	0.9154	High	10.77
Apo_p110g	830	842	IIFKHGDDLRQDM	8.69	3	11	8.64	8.71	0.177	1.757	0.9093	Medium	8.64	8.71	0.273	2.709	0.8237	Medium	8.64	8.71	0.219	2.173	0.8608	Medium	8.64	8.71	0.935	9.293	0.8876	Medium	8.64	8.71	0.951	9.447	0.8875	Medium	8.64	8.71	0.95	9.442	0.854	Medium	8.64	8.71	1.769	17.573	0.8769	Medium	8.64
Apo_p110g	844	848	ILQIL	12.17	1	3	12.24	12.31	0.007	0.255	0.9249	Medium	12.24	12.31	0.003	0.12	0.9139	Medium	12.24	12.31	0.015	0.541	0.8896	Medium	12.24	12.31	0.025	0.916	0.9176	Medium	12.24	12.31	0.015	0.546	0.9238	Medium	12.24	12.31	0.021	0.749	0.9067	Medium	12.24	12.31	0.022	0.804	0.9129	Medium	12.24
Apo_p110g	849	855	RIMESIW	11.65	2	5	11.7	11.77	0.015	0.319	0.954	High	11.7	11.77	0.029	0.637	0.9448	High	11.7	11.77	0.042	0.918	0.9383	High	11.7	11.77	0.028	0.619	0.9505	High	11.7	11.77	0.038	0.829	0.9359	High	11.7	11.77	0.023	0.5	0.9368	High	11.7	11.77	0.029	0.637	0.9178	High	11.7
Apo_p110g	849	860	RIMESIWETESL	12.23	2	10	12.32	12.38	0.164	1.793	0.8333	Medium	12.32	12.38	0.125	1.367	0.7913	Medium	12.32	12.38	0.106	1.158	0.7535	Medium	12.32	12.38	0.338	3.694	0.8094	Medium	12.32	12.39	0.37	4.044	0.8222	Medium	12.32	12.38	0.369	4.037	0.8057	Medium	12.32	12.38	1.168	12.768	0.8107	Medium	12.32
Apo_p110g	853	861	SIWETESLD	11.4	1	7	11.54	11.6	0.369	5.759	0.7783	Medium	11.54	11.6	0.405	6.327	0.7703	Medium	11.54	11.6	0.385	6.018	0.7476	Medium	11.54	11.6	0.675	10.534	0.766	Medium	11.54	11.61	0.716	11.179	0.7919	Medium	11.54	11.6	0.71	11.087	0.7579	Medium	11.54	11.6	1.491	23.286	0.7792	Medium	11.54
Apo_p110g	853	862	SIWETESLDL	13.27	1	8	13.37	13.44	0.325	4.436	0.8882	Medium	13.37	13.44	0.372	5.079	0.8741	Medium	13.37	13.44	0.369	5.034	0.8708	Medium	13.38	13.44	0.685	9.358	0.8711	Medium	13.38	13.44	0.657	8.981	0.8881	Medium	13.37	13.44	0.668	9.123	0.8759	Medium	13.37	13.44	1.469	20.063	0.8818	Medium	13.37
Apo_p110g	862	869	LCLLPYGC	13.44	1	5	13.43	13.5	0.143	3.127	0.7439	Medium	13.52	13.58	0.161	3.51	0.6415	Medium	13.5	13.57	0.168	3.673	0.6779	Medium	13.43	13.5	0.369	8.055	0.6904	Medium	13.44	13.5	0.423	9.235	0.6902	Medium	13.43	13.5	0.374	8.175	0.6532	Medium	13.43	13.5	0.907	19.835	0.6945	Medium	13.43
Apo_p110g	862	878	LCLLPYGCISTGDKIGM	13.06	2	14	13.06	13.14	0.262	2.044	0.93	High	13.06	13.14	0.289	2.258	0.9209	High	13.06	13.14	0.305	2.383	0.9146	High	13.06	13.14	0.614	4.791	0.9252	High	13.07	13.14	0.556	4.342	0.9264	High	13.06	13.14	0.604	4.717	0.921	High	13.06	13.14	1.5	11.708	0.9229	High	13.06
Apo_p110g	863	880	CLLPYGCISTGDKIGMIE	12.38	2	15	12.43	12.49	0.233	1.701	0.8885	Medium	12.43	12.49	0.343	2.502	0.8799	Medium	12.43	12.49	0.382	2.78	0.8822	Medium	12.43	12.49	0.631	4.601	0.8932	Medium	12.43	12.5	0.573	4.175	0.8915	Medium	12.43	12.49	0.633	4.612	0.8876	Medium	12.43	12.49	1.5	10.926	0.8763	Medium	12.43
Apo_p110g	870	878	ISTGDKIGM	7.68	2	7	7.62	7.69	0.346	5.403	0.8372	Medium	7.62	7.69	0.318	4.968	0.8443	Medium	7.62	7.69	0.366	5.714	0.8064	Medium	7.62	7.69	0.457	7.131	0.8562	Medium	7.62	7.7	0.455	7.109	0.8546	Medium	7.62	7.69	0.514	8.032	0.8165	Medium	7.62	7.69	0.987	15.416	0.8619	Medium	7.62
Apo_p110g	879	887	IEIVKDATT	7.08	1	7	7.28	7.35	1.342	20.95	0.9017	Medium	7.28	7.35	1.327	20.72	0.9142	Medium	7.28	7.35	1.382	21.574	0.9135	Medium	7.28	7.35	2.416	37.722	0.83	Medium	7.28	7.35	2.464	38.469	0.879	Medium	7.28	7.35	2.514	39.249	0.8743	Medium	7.28	7.35	3.226	50.368	0.7824	Medium	7.28
Apo_p110g	879	901	IEIVKDATTIAKIQQSTVGNTGA	10.02	2	21	9.92	10	6.595	34.323	0.8562	Medium	9.92	10	6.513	33.898	0.873	Medium	9.92	10	6.533	34	0.8669	Medium	9.92	10	8.26	42.985	0.7961	Medium	9.92	10	8.13	42.308	0.8061	Medium	9.92	10	8.161	42.471	0.8236	Medium	9.82	9.88	9.856	51.291	0.8172	Medium	9.92
Apo_p110g	880	888	EIVKDATTI	7.15	2	7	7.18	7.25	1.412	22.047	0.8661	Medium	7.18	7.25	1.412	22.043	0.871	Medium	7.18	7.25	1.466	22.893	0.8688	Medium	7.18	7.25	2.539	39.636	0.8724	Medium	7.18	7.25	2.585	40.352	0.862	Medium	7.18	7.25	2.64	41.217	0.8631	Medium	7.18	7.25	3.281	51.223	0.8489	Medium	7.18
Apo_p110g	888	901	IAKIQQSTVGNTGA	6.15	2	12	6.08	6.2	5.719	52.086	0.9311	High	6.08	6.2	5.589	50.903	0.9169	High	6.08	6.2	5.694	51.858	0.9234	High	6.08	6.2	6.181	56.297	0.9292	High	6.08	6.2	6.269	57.099	0.9252	High	6.08	6.2	6.213	56.584	0.9267	High	6.08	6.2	6.835	62.253	0.9098	High	6.08
Apo_p110g	888	902	IAKIQQSTVGNTGAF	8.64	2	13	8.58	8.64	5.858	49.244	0.8732	Medium	8.57	8.64	5.719	48.079	0.8609	Medium	8.57	8.64	5.833	49.035	0.7725	Medium	8.58	8.64	6.538	54.964	0.8812	Medium	8.58	8.64	6.573	55.259	0.8589	Medium	8.61	8.68	6.381	53.644	0.8186	Medium	8.57	8.64	7.156	60.157	0.8802	Medium	8.57
Apo_p110g	888	907	IAKIQQSTVGNTGAFKDEVL	9.51	3	18	9.55	9.62	5.719	34.726	0.8945	High	9.55	9.62	5.586	33.915	0.8828	Medium	9.55	9.62	5.639	34.239	0.8742	Medium	9.55	9.62	6.998	42.49	0.8872	High	9.55	9.63	6.915	41.984	0.8817	High	9.55	9.62	6.932	42.091	0.8704	Medium	9.55	9.62	7.815	47.451	0.8854	Medium	9.55
Apo_p110g	888	910	IAKIQQSTVGNTGAFKDEVLNHW	10.57	3	21	10.51	10.61	5.402	28.116	0.8682	High	10.5	10.61	5.362	27.905	0.8498	Medium	10.5	10.61	5.534	28.8	0.7898	Medium	10.51	10.61	6.629	34.502	0.9042	High	10.51	10.61	6.522	33.942	0.8822	High	10.5	10.61	6.676	34.746	0.8498	Medium	10.51	10.61	7.443	38.736	0.8976	High	10.5
Apo_p110g	902	910	FKDEVLNHW	10.04	3	7	10.04	10.11	0.14	2.189	0.9403	High	10.03	10.11	0.155	2.421	0.9237	High	10.03	10.11	0.148	2.307	0.9355	High	10.04	10.11	0.278	4.335	0.9262	High	10.04	10.11	0.263	4.113	0.9454	High	10.04	10.11	0.258	4.034	0.939	High	10.04	10.11	0.76	11.865	0.9381	High	10.03
Apo_p110g	902	924	FKDEVLNHWLKEKSPTEEKFQAA	9.58	3	20	9.42	9.5	1.184	6.47	0.8202	Medium	9.42	9.5	1.17	6.395	0.7919	Medium	9.42	9.5	1.411	7.708	0.7359	Medium	9.42	9.5	2.082	11.378	0.8202	Medium	9.42	9.5	2.084	11.388	0.8237	Medium	9.42	9.5	2.055	11.231	0.7816	Medium	9.42	9.5	3.092	16.896	0.8323	Medium	9.42
Apo_p110g	925	934	VERFVYSCAG	9.08	2	8	9.1	9.16	0.13	1.776	0.7717	Medium	9.09	9.16	0.149	2.032	0.7581	Medium	9.09	9.16	0.173	2.37	0.6973	Medium	9.1	9.16	0.147	2.007	0.7782	Medium	9.1	9.16	0.132	1.798	0.7673	Medium	9.09	9.16	0.16	2.187	0.742	Medium	9.09	9.16	0.131	1.795	0.7744	Medium	9.1
Apo_p110g	927	934	RFVYSCAG	8.29	2	6	8.41	8.48	0.067	1.22	0.9288	Medium	8.41	8.47	0.067	1.212	0.9171	Medium	8.41	8.47	0.085	1.547	0.9261	Medium	8.41	8.47	0.069	1.255	0.9274	Medium	8.41	8.48	0.065	1.187	0.9237	Medium	8.41	8.47	0.072	1.308	0.9254	Medium	8.41	8.47	0.127	2.319	0.9246	Medium	8.41
Apo_p110g	935	939	YCVAT	6.8	1	3	7.01	7.07	0.02	0.717	0.9031	Medium	7	7.07	0.026	0.958	0.9053	Medium	7	7.07	0.02	0.731	0.8965	Medium	7.01	7.07	0.02	0.712	0.9004	Medium	7.01	7.07	0.026	0.939	0.8966	Medium	7.01	7.07	0.017	0.629	0.8874	Medium	7.01	7.07	0.01	0.371	0.8971	Medium	7.01
Apo_p110g	940	953	FVLGIGDRHNDNIM	10.54	2	12	10.57	10.71	0.139	1.267	0.9099	High	10.57	10.71	0.144	1.316	0.918	High	10.57	10.71	0.149	1.355	0.9161	High	10.57	10.71	0.253	2.302	0.919	High	10.57	10.71	0.229	2.084	0.9028	High	10.57	10.71	0.276	2.513	0.9021	High	10.57	10.71	0.651	5.927	0.9148	High	10.57
Apo_p110g	954	960	ITETGNL	7.56	1	5	7.66	7.73	0.152	3.316	0.9233	High	7.67	7.73	0.186	4.056	0.9131	Medium	7.66	7.73	0.183	3.998	0.9156	Medium	7.66	7.73	0.659	14.394	0.9155	Medium	7.66	7.73	0.658	14.376	0.9165	Medium	7.66	7.73	0.681	14.883	0.9059	Medium	7.66	7.73	1.18	25.782	0.9103	Medium	7.66
Apo_p110g	954	961	ITETGNLF	11.33	1	6	11.34	11.4	0.155	2.828	0.9013	Medium	11.34	11.4	0.21	3.819	0.9022	Medium	11.33	11.4	0.249	4.543	0.8956	Medium	11.34	11.4	0.562	10.228	0.8848	Medium	11.34	11.41	0.582	10.594	0.9012	Medium	11.34	11.4	0.609	11.101	0.8975	Medium	11.34	11.4	0.937	17.059	0.8997	Medium	11.34
Apo_p110g	961	972	FHIDFGHILGNY	12.77	3	10	12.73	12.8	2.741	29.951	0.9602	High	12.73	12.8	2.724	29.772	0.9531	High	12.73	12.8	2.763	30.2	0.9493	High	12.73	12.8	3.342	36.523	0.9482	High	12.73	12.81	3.291	35.969	0.9537	High	12.73	12.8	3.264	35.67	0.9436	High	12.73	12.8	3.612	39.478	0.9513	High	12.73
Apo_p110g	961	975	FHIDFGHILGNYKSF	12.39	4	13	12.32	12.75	4.422	37.177	0.8859	High	12.32	12.75	4.382	36.841	0.8783	Medium	12.32	12.75	4.446	37.381	0.8551	Medium	12.32	12.75	5.006	42.089	0.8919	High	12.32	12.76	4.927	41.424	0.8869	High	12.32	12.75	4.902	41.214	0.8823	Medium	12.32	12.75	5.244	44.082	0.893	High	12.32
Apo_p110g	962	975	HIDFGHILGNYKSF	11.38	3	12	11.32	11.39	4.843	44.105	0.8709	Medium	11.32	11.39	4.808	43.785	0.8598	Medium	11.32	11.39	4.86	44.264	0.8012	Medium	11.32	11.39	5.423	49.391	0.8826	Medium	11.32	11.39	5.366	48.87	0.869	Medium	11.32	11.39	5.417	49.331	0.8223	Medium	11.32	11.39	5.68	51.73	0.8622	Medium	11.32
Apo_p110g	973	979	KSFLGIN	10.18	2	5	10.27	10.34	0.159	3.47	0.9233	Medium	10.27	10.34	0.158	3.46	0.8257	Medium	10.27	10.34	0.116	2.529	0.8245	Medium	10.27	10.34	0.225	4.922	0.8743	Medium	10.27	10.34	0.265	5.791	0.8347	Medium	10.27	10.34	0.211	4.61	0.9203	Medium	10.27	10.34	0.7	15.29	0.8366	Medium	10.27
Apo_p110g	993	1014	FVMGTSGKKTSPHFQKFQDICV	9.5	3	19	9.64	9.72	0.675	3.88	0.9203	High	9.64	9.72	0.689	3.964	0.9216	High	9.64	9.72	0.663	3.816	0.9061	High	9.64	9.72	0.944	5.427	0.9148	High	9.64	9.72	0.885	5.093	0.9188	High	9.64	9.72	0.922	5.305	0.914	High	9.64	9.72	1.202	6.913	0.9146	High	9.64
Apo_p110g	993	1014	FVMGTSGKKTSPHFQKFQDICV	9.5	4	19	9.52	9.62	0.665	3.822	0.896	High	9.51	9.61	0.634	3.646	0.8973	High	9.51	9.61	0.642	3.692	0.8797	High	9.52	9.62	0.875	5.031	0.8973	High	9.52	9.62	0.862	4.958	0.8861	High	9.51	9.62	0.886	5.094	0.8834	High	9.51	9.62	1.233	7.094	0.8801	High	9.51
Apo_p110g	1035	1042	LMTGMPQL	11.7	1	5	11.83	11.9	1.475	32.246	0.9126	High	11.83	11.9	1.465	32.012	0.9035	High	11.83	11.9	1.521	33.252	0.8725	High	11.83	11.9	2.531	55.316	0.862	High	11.83	11.9	2.564	56.036	0.9052	High	11.83	11.9	2.549	55.72	0.9034	High	11.83	11.9	3.25	71.048	0.87	High	11.83
Apo_p110g	1035	1050	LMTGMPQLTSKEDIEY	10.94	2	13	10.88	10.96	3.517	29.564	0.9191	High	10.88	10.96	3.43	28.835	0.9145	High	10.88	10.96	3.534	29.709	0.9002	High	10.88	10.96	5.451	45.829	0.911	High	10.88	10.96	5.35	44.977	0.9213	High	10.88	10.96	5.415	45.52	0.9069	High	10.88	10.96	7.156	60.159	0.9112	High	10.88
Apo_p110g	1036	1049	MTGMPQLTSKEDIE	9.51	2	11	9.46	9.52	3.483	34.607	0.7548	Medium	9.46	9.52	3.414	33.923	0.7599	Medium	9.51	9.58	3.506	34.837	0.7674	Medium	9.46	9.52	5.08	50.474	0.7634	Medium	9.46	9.53	5.014	49.815	0.7663	Medium	9.46	9.52	5.044	50.118	0.7596	Medium	9.46	9.52	6.219	61.788	0.7684	Medium	9.46
Apo_p110g	1050	1071	YIRDALTVGKNEEDAKKYFLDQ	9.72	4	20	9.72	9.78	2.138	11.685	0.912	High	9.72	9.78	2.138	11.685	0.9109	High	9.72	9.78	2.168	11.846	0.8977	High	9.72	9.78	2.393	13.079	0.9251	High	9.72	9.79	2.368	12.937	0.9104	High	9.72	9.78	2.451	13.393	0.907	High	9.72	9.78	2.802	15.31	0.9158	High	9.72
Apo_p110g	1051	1071	IRDALTVGKNEEDAKKYFLDQ	9.5	4	19	9.45	9.52	1.954	11.241	0.8791	Medium	9.45	9.52	1.932	11.113	0.873	Medium	9.45	9.52	2.003	11.522	0.8581	Medium	9.45	9.52	2.208	12.7	0.8634	Medium	9.45	9.53	2.151	12.371	0.8645	Medium	9.45	9.52	2.245	12.916	0.8618	Medium	9.45	9.52	2.463	14.167	0.866	Medium	9.45
Apo_p110g	1072	1084	IEVCRDKGWTVQF	11.18	2	11	11.23	11.29	1.023	10.166	0.8768	High	11.23	11.29	1.086	10.785	0.8512	Medium	11.23	11.29	1.05	10.432	0.8261	Medium	11.23	11.29	2.871	28.524	0.882	High	11.23	11.3	2.785	27.669	0.8759	Medium	11.23	11.29	2.805	27.872	0.8587	Medium	11.23	11.29	4.576	45.462	0.8854	High	11.23
Apo_p110g	1074	1084	VCRDKGWTVQF	10.65	3	9	10.72	10.79	0.938	11.395	0.9474	Medium	10.71	10.79	0.998	12.121	0.9275	Medium	10.71	10.79	0.956	11.607	0.9223	Medium	10.72	10.79	2.753	33.428	0.9461	Medium	10.72	10.79	2.709	32.892	0.9502	Medium	10.71	10.79	2.713	32.942	0.9381	Medium	10.71	10.79	4.457	54.127	0.8885	Medium	10.71
Apo_p110g	1088	1092	LHLVL	11.09	2	3	10.98	11.05	0.827	30.14	0.9184	High	10.97	11.05	0.864	31.462	0.9446	High	10.97	11.05	0.916	33.385	0.9222	High	10.98	11.05	2.136	77.805	0.9031	High	10.98	11.05	2.095	76.318	0.927	High	10.97	11.05	2.089	76.092	0.9324	High	10.97	11.05	2.175	79.253	0.9374	High	10.97
R1021C_p110g	3	12	LENYKQPVVL	9.52	1	7	9.51	9.59	4.762	74.354	0.8328	Medium	9.55	9.62	4.686	73.166	0.8292	Medium	9.52	9.59	4.712	73.575	0.8299	Medium	9.51	9.59	4.785	74.707	0.8138	Medium	9.52	9.61	4.901	76.516	0.8519	Medium	9.49	9.56	4.804	75.011	0.8183	Medium	9.41	9.48	4.797	74.89	0.8099	Medium	9.52
R1021C_p110g	6	12	YKQPVVL	8.8	1	4	8.78	8.85	3.174	86.726	0.9087	Medium	8.79	8.85	3.142	85.853	0.9039	Medium	8.79	8.86	3.169	86.576	0.914	Medium	8.78	8.85	3.207	87.622	0.9075	Medium	8.79	8.85	3.206	87.592	0.9026	Medium	8.78	8.85	3.258	89.019	0.9207	Medium	8.81	8.88	3.194	87.276	0.921	Medium	8.79
R1021C_p110g	36	41	ELIPIE	10.59	1	3	10.7	10.78	0.028	1.025	0.8708	High	10.7	10.77	0.015	0.558	0.865	High	10.7	10.78	0.035	1.258	0.8765	High	10.7	10.77	0.051	1.847	0.8726	High	10.7	10.77	0.06	2.192	0.8712	High	10.7	10.77	0.048	1.75	0.8715	High	10.7	10.77	0.254	9.268	0.8955	High	10.7
R1021C_p110g	36	42	ELIPIEF	13.88	1	4	13.97	14.04	0.09	2.452	0.8534	Medium	13.97	14.04	0.086	2.337	0.8524	Medium	13.96	14.04	0.101	2.76	0.8385	Medium	13.96	14.04	0.133	3.633	0.8433	Medium	13.96	14.04	0.1	2.727	0.8447	Medium	13.96	14.04	0.116	3.171	0.8416	Medium	13.96	14.04	0.323	8.828	0.8509	Medium	13.96
R1021C_p110g	42	58	FVLPTSQRKCKSPETAL	8.48	2	13	8.34	8.48	3.551	29.85	0.9469	High	8.34	8.48	3.483	29.284	0.9441	High	8.34	8.49	3.431	28.842	0.9478	High	8.34	8.48	4.375	36.782	0.9485	High	8.34	8.48	4.311	36.239	0.9514	High	8.34	8.49	4.514	37.95	0.9442	High	8.34	8.48	5.128	43.109	0.938	High	8.34
R1021C_p110g	42	59	FVLPTSQRKCKSPETALL	9.46	2	14	9.47	9.56	2.958	23.095	0.9256	High	9.47	9.56	2.947	23.007	0.9289	High	9.48	9.56	2.922	22.806	0.9163	High	9.47	9.56	3.84	29.973	0.9347	High	9.47	9.56	3.74	29.198	0.9317	High	9.47	9.56	3.877	30.269	0.9217	High	9.47	9.56	4.547	35.495	0.9243	High	9.51
R1021C_p110g	43	59	VLPTSQRKCKSPETALL	8.07	2	13	8.04	8.1	3.651	30.696	0.9144	High	8.04	8.11	3.561	29.937	0.9245	High	8.04	8.11	3.588	30.161	0.8814	Medium	8.04	8.1	4.563	38.364	0.9053	High	8.04	8.11	4.461	37.502	0.9181	High	8.04	8.11	4.732	39.779	0.8992	Medium	8.04	8.11	5.276	44.359	0.9057	High	8.11
R1021C_p110g	59	69	LHVAGHGNVEQ	5.03	2	9	5.03	5.11	0.663	8.057	0.845	Medium	5.03	5.1	0.691	8.39	0.8587	Medium	5.04	5.1	0.709	8.609	0.8116	Medium	5.03	5.1	1.31	15.913	0.8294	Medium	5.03	5.1	1.393	16.92	0.8243	Medium	5.04	5.11	1.431	17.382	0.8284	Medium	5.08	5.14	1.975	23.988	0.8176	Medium	5.11
R1021C_p110g	59	70	LHVAGHGNVEQM	6.54	2	10	6.64	6.74	0.706	7.716	0.904	High	6.64	6.74	0.66	7.211	0.9048	High	6.64	6.74	0.648	7.078	0.9115	High	6.64	6.74	1.16	12.674	0.911	High	6.64	6.74	1.108	12.107	0.9029	High	6.64	6.74	1.21	13.221	0.91	High	6.64	6.74	1.783	19.482	0.9242	High	6.64
R1021C_p110g	59	74	LHVAGHGNVEQMKAQV	6.81	2	14	6.74	6.81	0.517	4.036	0.9009	High	6.74	6.82	0.482	3.76	0.9015	High	6.74	6.82	0.483	3.767	0.8937	Medium	6.74	6.81	0.939	7.331	0.8984	Medium	6.74	6.81	0.899	7.021	0.9038	High	6.74	6.81	1.001	7.813	0.8974	Medium	6.74	6.81	1.459	11.388	0.8659	Medium	6.74
R1021C_p110g	60	69	HVAGHGNVEQ	3.57	2	8	3.67	3.74	0.715	9.762	0.855	Medium	3.64	3.71	0.653	8.923	0.8876	Medium	3.68	3.74	0.59	8.067	0.8674	Medium	3.67	3.74	1.379	18.835	0.8066	Medium	3.67	3.74	1.413	19.3	0.8567	Medium	3.67	3.74	1.459	19.926	0.8547	Medium	3.63	3.7	1.985	27.119	0.8491	Medium	3.66
R1021C_p110g	60	70	HVAGHGNVEQM	5.29	1	9	5.28	5.38	0.539	6.54	0.9013	High	5.28	5.38	0.523	6.345	0.8977	Medium	5.28	5.38	0.626	7.602	0.8723	Medium	5.28	5.38	1.068	12.963	0.8775	Medium	5.28	5.38	1.104	13.405	0.8901	Medium	5.28	5.38	1.224	14.86	0.8853	Medium	5.35	5.44	1.728	20.984	0.8621	Medium	5.28
R1021C_p110g	71	76	KAQVWL	10.59	1	4	10.71	10.79	0.033	0.91	0.938	Medium	10.71	10.78	0.044	1.192	0.9234	Medium	10.71	10.79	0.035	0.953	0.9219	Medium	10.71	10.78	0.042	1.153	0.9225	Medium	10.71	10.78	0.054	1.476	0.9238	Medium	10.71	10.79	0.042	1.138	0.9188	Medium	10.71	10.78	0.059	1.604	0.9061	Medium	10.71
R1021C_p110g	77	84	RALETSVA	6.28	2	6	6.15	6.22	2.014	36.68	0.8808	Medium	6.19	6.27	1.962	35.745	0.8552	Medium	6.19	6.26	1.993	36.308	0.8887	Medium	6.22	6.28	2.697	49.127	0.8122	Medium	6.23	6.29	2.701	49.197	0.8202	Medium	6.2	6.26	2.785	50.731	0.8866	Medium	6.1	6.17	3.277	59.696	0.8279	Medium	6.24
R1021C_p110g	79	84	LETSVA	6.27	1	4	6.28	6.36	1.979	54.064	0.9169	Medium	6.29	6.37	1.936	52.895	0.9136	Medium	6.29	6.36	1.94	53.006	0.9148	Medium	6.28	6.36	2.666	72.835	0.913	Medium	6.28	6.36	2.669	72.929	0.9072	Medium	6.28	6.36	2.692	73.546	0.9199	Medium	6.29	6.36	2.886	78.845	0.9089	Medium	6.26
R1021C_p110g	79	86	LETSVAAD	6.06	1	6	6.17	6.23	3.189	58.092	0.9021	Medium	6.21	6.27	3.17	57.749	0.8912	Medium	6.17	6.24	3.186	58.042	0.8846	Medium	6.17	6.23	4.011	73.054	0.8846	Medium	6.17	6.23	4.012	73.078	0.8951	High	6.17	6.24	4.037	73.538	0.8783	Medium	6.17	6.23	4.218	76.835	0.861	Medium	6.22
R1021C_p110g	87	99	FYHRLGPHHFLLL	10.38	4	10	10.23	10.3	0.251	2.746	0.9492	High	10.24	10.3	0.261	2.858	0.946	High	10.24	10.31	0.286	3.122	0.9522	High	10.24	10.3	0.545	5.957	0.9316	High	10.24	10.3	0.523	5.72	0.9533	High	10.23	10.3	0.534	5.841	0.9353	High	10.24	10.3	0.664	7.261	0.9421	High	10.24
R1021C_p110g	88	98	YHRLGPHHFLL	8.43	4	8	8.6	8.67	0.295	4.026	0.8962	High	8.6	8.67	0.297	4.059	0.9006	High	8.6	8.67	0.29	3.966	0.9121	High	8.6	8.67	0.634	8.663	0.9027	High	8.6	8.67	0.638	8.711	0.9123	High	8.61	8.67	0.664	9.069	0.9141	High	8.6	8.67	0.807	11.022	0.8913	High	8.6
R1021C_p110g	88	99	YHRLGPHHFLLL	9.88	4	9	10.02	10.08	0.274	3.325	0.9361	High	10.02	10.09	0.282	3.423	0.9321	High	10.02	10.09	0.277	3.368	0.9247	High	10.02	10.08	0.584	7.088	0.9428	High	10.02	10.09	0.574	6.974	0.9356	High	10.02	10.08	0.598	7.258	0.9336	High	10.02	10.09	0.738	8.967	0.9355	High	10.02
R1021C_p110g	100	106	YQKKGQW	5.9	1	5	6.05	6.12	1.45	31.703	0.9337	High	6.06	6.13	1.402	30.646	0.9457	High	6.05	6.13	1.445	31.591	0.9435	High	6.05	6.12	2.311	50.524	0.9192	High	6.05	6.13	2.346	51.288	0.9253	High	6.06	6.13	2.38	52.021	0.9223	High	6.05	6.13	2.597	56.776	0.9198	High	6.05
R1021C_p110g	107	113	YEIYDKY	9.07	1	5	9.02	9.09	1.189	25.999	0.861	Medium	9.02	9.09	1.144	25.016	0.846	Medium	9.02	9.09	1.142	24.961	0.8003	Medium	9.02	9.09	1.891	41.331	0.8382	Medium	9.02	9.09	1.822	39.821	0.8407	Medium	9.02	9.09	1.876	41.011	0.8	Medium	9.02	9.09	2.422	52.934	0.8317	Medium	9.02
R1021C_p110g	107	118	YEIYDKYQVVQT	9.45	2	10	9.37	9.45	1.132	12.377	0.9134	High	9.37	9.45	1.087	11.883	0.9135	High	9.38	9.45	1.091	11.92	0.8968	High	9.37	9.45	1.834	20.04	0.9001	High	9.37	9.45	1.788	19.537	0.9114	High	9.37	9.45	1.836	20.064	0.8824	High	9.37	9.45	3.041	33.231	0.8902	High	9.37
R1021C_p110g	107	119	YEIYDKYQVVQTL	10.78	2	11	10.78	10.85	1.124	11.171	0.8318	Medium	10.77	10.84	1.118	11.107	0.8453	Medium	10.78	10.84	1.098	10.906	0.7888	Medium	10.77	10.84	1.861	18.491	0.8224	Medium	10.77	10.84	1.801	17.892	0.8113	Medium	10.77	10.85	1.83	18.184	0.8274	Medium	10.77	10.84	3.06	30.407	0.8048	Medium	10.77
R1021C_p110g	122	137	LRYWKATHRSPGQIHL	7.45	4	13	7.57	7.65	0.476	4.004	0.8988	High	7.57	7.65	0.446	3.75	0.9036	High	7.57	7.65	0.454	3.82	0.8917	Medium	7.57	7.64	1.067	8.968	0.9029	High	7.57	7.64	1.019	8.569	0.8957	High	7.57	7.64	1.11	9.332	0.8865	Medium	7.57	7.64	1.93	16.224	0.9001	High	7.57
R1021C_p110g	122	149	LRYWKATHRSPGQIHLVQRHPPSEESQA	6.23	5	23	6.39	6.47	1.922	9.132	0.9292	High	6.4	6.47	1.805	8.578	0.9367	High	6.4	6.47	1.884	8.954	0.9302	High	6.39	6.47	3.341	15.875	0.9416	High	6.39	6.47	3.27	15.537	0.9451	High	6.39	6.47	3.386	16.089	0.937	High	6.39	6.47	4.721	22.433	0.9296	High	6.39
R1021C_p110g	125	137	WKATHRSPGQIHL	6.85	3	10	6.87	6.95	0.538	5.88	0.9299	High	6.88	6.95	0.495	5.41	0.9363	High	6.87	6.95	0.553	6.045	0.9311	High	6.87	6.95	1.058	11.561	0.9383	High	6.87	6.95	1.071	11.703	0.9401	High	6.87	6.95	1.162	12.699	0.9335	High	6.87	6.95	1.515	16.555	0.9342	High	6.87
R1021C_p110g	138	149	VQRHPPSEESQA	4.07	2	8	4.07	4.15	2.759	37.698	0.9433	High	4.08	4.15	2.716	37.104	0.9365	High	4.08	4.15	2.761	37.713	0.9386	High	4.07	4.15	3.736	51.04	0.9389	High	4.08	4.15	3.611	49.324	0.9366	High	4.08	4.16	3.595	49.112	0.9444	High	4.08	4.15	4.4	60.114	0.9218	High	4.08
R1021C_p110g	146	157	ESQAFQRQLTAL	10.35	2	10	10.22	10.29	0.293	3.201	0.8775	Medium	10.22	10.29	0.313	3.418	0.8528	Medium	10.22	10.29	0.298	3.262	0.8855	Medium	10.22	10.29	1.095	11.972	0.8149	Medium	10.22	10.29	1.007	11.011	0.816	Medium	10.22	10.29	1.038	11.345	0.8453	Medium	10.18	10.25	2.728	29.819	0.6977	Medium	10.22
R1021C_p110g	150	157	FQRQLTAL	9.07	1	6	9.07	9.14	0.11	1.996	0.9267	High	9.07	9.14	0.106	1.929	0.9263	High	9.07	9.14	0.118	2.158	0.9038	High	9.07	9.14	0.252	4.591	0.9258	High	9.07	9.14	0.246	4.481	0.931	High	9.07	9.14	0.264	4.816	0.9165	High	9.07	9.14	0.921	16.777	0.9136	High	9.07
R1021C_p110g	151	157	QRQLTAL	7.99	2	5	8.05	8.12	0.107	2.336	0.9029	Medium	8.06	8.12	0.097	2.129	0.9166	Medium	8.06	8.12	0.128	2.807	0.919	Medium	8.05	8.12	0.265	5.798	0.9325	Medium	8.06	8.12	0.274	5.984	0.9268	Medium	8.06	8.13	0.272	5.944	0.9328	Medium	8.06	8.12	0.929	20.306	0.9014	High	8.06
R1021C_p110g	158	164	IGYDVTD	8.21	1	5	8.31	8.37	0.6	13.107	0.9013	High	8.31	8.38	0.591	12.912	0.9232	High	8.31	8.38	0.587	12.821	0.9019	High	8.31	8.37	0.876	19.142	0.9041	High	8.31	8.38	0.863	18.87	0.9265	High	8.31	8.37	0.908	19.844	0.9021	High	8.31	8.37	1.956	42.758	0.9052	High	8.31
R1021C_p110g	158	172	IGYDVTDVSNVHDDE	8.84	2	13	8.74	8.81	2.985	25.091	0.8548	Medium	8.74	8.81	2.891	24.306	0.8148	Medium	8.75	8.81	3.019	25.379	0.741	Medium	8.74	8.81	3.636	30.565	0.8617	Medium	8.74	8.81	3.599	30.257	0.8281	Medium	8.74	8.81	3.719	31.268	0.7643	Medium	8.74	8.81	4.838	40.669	0.8322	Medium	8.74
R1021C_p110g	158	173	IGYDVTDVSNVHDDEL	10.35	2	14	10.34	10.42	2.775	21.66	0.8615	Medium	10.34	10.41	2.763	21.567	0.8671	Medium	10.34	10.42	2.874	22.434	0.8683	Medium	10.34	10.41	4.012	31.32	0.8564	Medium	10.34	10.41	3.874	30.246	0.8692	Medium	10.34	10.41	3.992	31.165	0.854	Medium	10.34	10.41	4.951	38.652	0.8451	Medium	10.34
R1021C_p110g	158	174	IGYDVTDVSNVHDDELE	9.93	2	15	9.95	10.03	2.877	20.961	0.9133	High	9.95	10.03	2.77	20.185	0.9162	High	9.95	10.03	2.903	21.15	0.8966	High	9.95	10.03	4.003	29.163	0.9193	High	9.95	10.03	3.871	28.204	0.9209	High	9.95	10.03	4.056	29.555	0.9077	High	9.95	10.03	5.267	38.378	0.913	High	9.95
R1021C_p110g	161	172	DVTDVSNVHDDE	6.76	2	10	6.53	6.61	2.865	31.317	0.7976	Medium	6.54	6.62	2.759	30.154	0.7992	Medium	6.54	6.61	2.826	30.887	0.7299	Medium	6.53	6.61	3.525	38.521	0.7812	Medium	6.54	6.61	3.539	38.679	0.7677	Medium	6.53	6.61	3.657	39.968	0.7544	Medium	6.54	6.61	4.3	46.995	0.7817	Medium	6.54
R1021C_p110g	161	174	DVTDVSNVHDDELE	8.32	2	12	8.41	8.49	2.674	24.356	0.933	High	8.42	8.49	2.579	23.488	0.9359	High	8.42	8.49	2.586	23.556	0.9169	High	8.41	8.49	3.736	34.022	0.9121	High	8.42	8.49	3.635	33.105	0.9345	High	8.41	8.5	3.778	34.411	0.9251	High	8.42	8.49	4.652	42.364	0.9243	High	8.42
R1021C_p110g	161	175	DVTDVSNVHDDELEF	11.28	2	13	11.38	11.46	2.424	20.38	0.8903	Medium	11.38	11.46	2.397	20.152	0.8887	Medium	11.39	11.46	2.472	20.784	0.8993	Medium	11.39	11.46	3.513	29.53	0.8902	Medium	11.39	11.46	3.36	28.244	0.8927	Medium	11.38	11.46	3.488	29.326	0.9017	Medium	11.39	11.46	4.24	35.644	0.8938	Medium	11.39
R1021C_p110g	165	174	VSNVHDDELE	6.54	1	8	6.65	6.72	1.166	15.929	0.8161	Medium	6.66	6.73	1.129	15.42	0.8459	Medium	6.66	6.72	1.157	15.808	0.7744	Medium	6.65	6.72	2.119	28.953	0.8067	Medium	6.65	6.72	2.161	29.518	0.8394	Medium	6.65	6.72	2.231	30.478	0.7897	Medium	6.63	6.7	2.685	36.678	0.7962	Medium	6.65
R1021C_p110g	174	182	EFTRRGLVT	7.02	1	7	6.97	7.05	0.218	3.398	0.8986	Medium	6.98	7.04	0.162	2.528	0.9126	Medium	6.98	7.04	0.193	3.019	0.8907	Medium	6.97	7.04	0.254	3.969	0.8916	Medium	6.97	7.04	0.248	3.865	0.9038	Medium	6.97	7.04	0.275	4.295	0.8885	Medium	6.97	7.04	0.632	9.87	0.8738	Medium	6.97
R1021C_p110g	174	182	EFTRRGLVT	7.02	2	7	6.9	7.3	0.178	2.777	0.9301	High	6.9	7.3	0.185	2.896	0.9268	High	6.9	7.29	0.211	3.29	0.9305	High	6.9	7.29	0.249	3.88	0.9225	High	6.9	7.29	0.238	3.719	0.9309	High	6.9	7.29	0.249	3.894	0.9323	High	6.9	7.29	0.643	10.044	0.9025	High	6.9
R1021C_p110g	174	187	EFTRRGLVTPRMAE	7.6	2	11	7.69	7.75	0.218	2.163	0.8486	Medium	7.69	7.76	0.229	2.276	0.857	Medium	7.69	7.76	0.327	3.252	0.8605	Medium	7.68	7.75	0.321	3.185	0.8528	Medium	7.69	7.75	0.297	2.948	0.8773	Medium	7.68	7.76	0.331	3.292	0.8523	Medium	7.69	7.75	0.765	7.599	0.8428	Medium	7.69
R1021C_p110g	174	195	EFTRRGLVTPRMAEVASRDPKL	8.27	5	18	8.27	8.35	0.907	5.507	0.8817	Medium	8.28	8.35	0.895	5.436	0.918	High	8.28	8.35	0.939	5.704	0.8975	Medium	8.27	8.35	1.62	9.838	0.9083	High	8.27	8.35	1.521	9.232	0.9102	High	8.28	8.35	1.589	9.65	0.9092	High	8.27	8.35	2.803	17.02	0.8394	Medium	8.27
R1021C_p110g	175	182	FTRRGLVT	6.27	1	6	6.17	6.24	0.182	3.311	0.8591	Medium	6.18	6.25	0.194	3.527	0.8436	Medium	6.18	6.24	0.139	2.53	0.7683	Medium	6.17	6.24	0.306	5.569	0.8408	Medium	6.18	6.24	0.249	4.529	0.8239	Medium	6.18	6.25	0.289	5.269	0.8213	Medium	6.18	6.24	0.653	11.89	0.8308	Medium	6.18
R1021C_p110g	176	182	TRRGLVT	4.73	2	5	4.89	4.96	0.141	3.092	0.9502	Medium	4.89	4.96	0.161	3.508	0.9543	High	4.89	4.96	0.158	3.462	0.9153	High	4.89	4.96	0.214	4.679	0.9345	Medium	4.89	4.96	0.218	4.764	0.9525	High	4.9	4.96	0.24	5.254	0.9499	High	4.89	4.96	0.589	12.864	0.9287	High	4.89
R1021C_p110g	176	185	TRRGLVTPRM	6.49	2	7	6.62	6.69	0.162	2.533	0.9042	Medium	6.63	6.7	0.17	2.647	0.9183	Medium	6.62	6.7	0.261	4.078	0.8906	Medium	6.62	6.69	0.278	4.333	0.8861	Medium	6.62	6.7	0.258	4.024	0.9126	Medium	6.62	6.69	0.275	4.293	0.9139	Medium	6.62	6.7	0.72	11.248	0.8618	Medium	6.62
R1021C_p110g	176	185	TRRGLVTPRM	6.49	3	7	6.4	6.92	0.215	3.359	0.9285	Medium	6.41	6.93	0.159	2.484	0.9399	High	6.4	6.92	0.191	2.981	0.9242	High	6.4	6.92	0.258	4.035	0.9539	High	6.4	6.92	0.219	3.418	0.9394	High	6.4	6.92	0.233	3.637	0.9362	High	6.4	6.92	0.607	9.479	0.9285	High	6.4
R1021C_p110g	176	195	TRRGLVTPRMAEVASRDPKL	7.58	4	16	7.55	7.61	0.929	6.348	0.9195	Medium	7.55	7.61	0.901	6.157	0.932	High	7.55	7.61	0.975	6.663	0.8561	Medium	7.54	7.61	1.608	10.985	0.9228	High	7.54	7.61	1.552	10.601	0.9054	High	7.54	7.61	1.602	10.94	0.8883	High	7.54	7.61	2.897	19.79	0.8777	Medium	7.54
R1021C_p110g	186	195	AEVASRDPKL	5.95	2	7	6.05	6.11	0.935	14.602	0.9271	High	6.06	6.12	0.915	14.281	0.9239	High	6.05	6.12	0.954	14.888	0.9221	High	6.05	6.12	1.512	23.611	0.9236	High	6.05	6.12	1.55	24.204	0.9248	High	6.06	6.12	1.559	24.337	0.9145	High	6.05	6.12	2.415	37.707	0.9485	High	6.05
R1021C_p110g	188	195	VASRDPKL	5.26	2	5	5.31	5.38	0.945	20.652	0.9461	High	5.3	5.38	0.933	20.383	0.9317	High	5.3	5.38	0.946	20.679	0.9403	High	5.3	5.38	1.497	32.731	0.9284	High	5.3	5.38	1.506	32.917	0.928	High	5.31	5.38	1.528	33.389	0.9335	High	5.3	5.38	2.078	45.412	0.9477	High	5.3
R1021C_p110g	196	211	YAMHPWVTSKPLPEYL	11.65	2	11	11.74	11.82	2.542	25.259	0.8763	High	11.75	11.82	2.484	24.681	0.8774	High	11.75	11.83	2.532	25.155	0.8924	High	11.75	11.82	3.534	35.107	0.9075	High	11.75	11.82	3.464	34.415	0.8997	High	11.75	11.82	3.481	34.585	0.9006	High	11.75	11.82	4.563	45.334	0.8856	High	11.75
R1021C_p110g	196	211	YAMHPWVTSKPLPEYL	11.65	3	11	11.58	12.15	2.539	25.226	0.8887	High	11.58	12.15	2.495	24.79	0.8906	High	11.58	12.15	2.514	24.978	0.8837	High	11.58	12.15	3.53	35.07	0.8859	High	11.58	12.15	3.442	34.196	0.8929	High	11.58	12.15	3.443	34.211	0.8832	High	11.58	12.15	4.58	45.5	0.8748	High	11.58
R1021C_p110g	212	218	WKKIANN	5.03	1	5	5.03	5.11	2.01	43.926	0.8636	Medium	5.03	5.1	2.037	44.514	0.8356	Medium	5.04	5.1	1.982	43.318	0.8064	Medium	5.03	5.1	2.807	61.354	0.8224	Medium	5.03	5.1	2.859	62.482	0.8039	Medium	5.04	5.11	2.795	61.087	0.824	Medium	5.03	5.1	3.295	72.028	0.7761	Medium	5.03
R1021C_p110g	212	221	WKKIANNCIF	10.39	1	8	10.44	10.5	1.475	20.151	0.921	High	10.43	10.5	1.435	19.608	0.8748	Medium	10.43	10.5	1.448	19.786	0.9066	High	10.43	10.5	2.6	35.516	0.9116	High	10.43	10.5	2.498	34.132	0.9051	High	10.43	10.49	2.498	34.122	0.888	High	10.43	10.5	3.79	51.775	0.9063	High	10.43
R1021C_p110g	222	232	IVIHRSTTSQT	4.59	2	9	4.7	4.76	2.558	31.066	0.9506	High	4.7	4.76	2.53	30.724	0.9573	High	4.7	4.77	2.572	31.231	0.9549	High	4.7	4.76	2.752	33.415	0.9535	High	4.7	4.77	2.736	33.224	0.9545	High	4.7	4.77	2.762	33.545	0.9502	High	4.7	4.77	2.921	35.468	0.9488	High	4.7
R1021C_p110g	222	245	IVIHRSTTSQTIKVSPDDTPGAIL	9.13	4	20	8.81	9.51	2.031	11.1	0.8945	High	8.81	9.51	1.998	10.915	0.8987	High	8.81	9.51	2.083	11.385	0.8914	High	8.81	9.51	2.785	15.22	0.9036	High	8.81	9.51	2.731	14.923	0.898	High	8.81	9.5	2.841	15.526	0.8961	High	8.81	9.51	3.698	20.209	0.8963	High	8.81
R1021C_p110g	223	233	VIHRSTTSQTI	4.58	3	9	4.69	4.76	2.594	31.501	0.9323	High	4.69	4.76	2.534	30.768	0.9433	High	4.69	4.77	2.586	31.401	0.9295	High	4.69	4.76	2.783	33.79	0.9426	High	4.69	4.77	2.75	33.392	0.9441	High	4.7	4.77	2.807	34.087	0.9361	High	4.69	4.77	2.981	36.201	0.9356	High	4.69
R1021C_p110g	232	245	TIKVSPDDTPGAIL	10.16	2	10	10.08	10.15	1.063	11.62	0.8709	High	10.09	10.15	1.099	12.008	0.8721	High	10.09	10.16	1.078	11.779	0.8006	Medium	10.08	10.15	1.819	19.88	0.8636	Medium	10.09	10.15	1.807	19.747	0.8537	Medium	10.08	10.15	1.841	20.117	0.8308	Medium	10.09	10.15	2.639	28.845	0.8493	Medium	10.09
R1021C_p110g	233	245	IKVSPDDTPGAIL	9.99	1	9	10.04	10.12	0.751	9.122	0.9281	High	10.04	10.12	0.788	9.573	0.9232	High	10.05	10.12	0.782	9.491	0.9007	Medium	10.04	10.12	1.064	12.916	0.8987	High	10.04	10.12	1.03	12.512	0.9136	High	10.04	10.12	1.015	12.327	0.9072	High	10.04	10.12	1.801	21.865	0.9059	Medium	10.04
R1021C_p110g	233	245	IKVSPDDTPGAIL	9.99	2	9	9.84	10.33	0.79	9.593	0.9024	High	9.84	10.33	0.809	9.822	0.9078	High	9.85	10.33	0.836	10.148	0.8978	Medium	9.84	10.33	1.074	13.042	0.9103	High	9.84	10.33	1.049	12.743	0.9074	High	9.84	10.33	1.078	13.09	0.8972	High	9.84	10.33	1.85	22.46	0.9021	High	9.84
R1021C_p110g	248	269	FFTKMAKKKSLMDIPESQSEQD	8.24	3	19	8.15	8.21	7.557	43.467	0.9195	Medium	8.15	8.22	7.424	42.703	0.913	Medium	8.15	8.22	7.501	43.148	0.8619	Medium	8.15	8.21	8.084	46.502	0.8996	Medium	8.15	8.22	7.947	45.714	0.8814	Medium	8.15	8.22	8.263	47.531	0.8929	Medium	8.15	8.22	8.128	46.752	0.8931	Medium	8.15
R1021C_p110g	249	269	FTKMAKKKSLMDIPESQSEQD	7.24	3	18	7.38	7.45	8.123	49.323	0.923	High	7.38	7.45	7.853	47.68	0.9199	High	7.38	7.45	8.005	48.604	0.9058	High	7.37	7.45	8.518	51.718	0.9106	High	7.38	7.45	8.381	50.887	0.9164	High	7.38	7.45	8.828	53.6	0.9183	High	7.38	7.45	8.709	52.878	0.9097	High	7.38
R1021C_p110g	249	269	FTKMAKKKSLMDIPESQSEQD	7.24	4	18	7.3	7.36	8.21	49.849	0.9172	High	7.3	7.35	7.967	48.375	0.911	High	7.29	7.35	8.164	49.568	0.9155	High	7.29	7.35	8.686	52.739	0.9163	High	7.29	7.35	8.536	51.83	0.9029	High	7.29	7.36	8.96	54.401	0.9159	High	7.29	7.35	8.83	53.615	0.8876	High	7.29
R1021C_p110g	270	278	FVLRVCGRD	8.8	3	7	8.91	8.98	0.332	5.19	0.8878	High	8.91	8.99	0.296	4.625	0.9058	High	8.91	8.99	0.295	4.598	0.9011	High	8.91	8.98	0.424	6.625	0.899	High	8.91	8.99	0.381	5.951	0.9112	High	8.91	8.98	0.413	6.451	0.9076	High	8.91	8.99	0.761	11.886	0.9059	High	8.91
R1021C_p110g	270	281	FVLRVCGRDEYL	11.08	3	10	11.12	11.18	0.241	2.632	0.9269	High	11.12	11.18	0.257	2.804	0.9128	High	11.12	11.19	0.251	2.745	0.8856	High	11.12	11.18	0.351	3.84	0.9156	High	11.12	11.19	0.323	3.528	0.9138	High	11.12	11.18	0.339	3.7	0.8968	High	11.12	11.19	0.62	6.779	0.9258	High	11.12
R1021C_p110g	282	291	VGETPIKNFQ	8	1	7	8.08	8.15	0.564	8.811	0.9177	High	8.08	8.16	0.579	9.041	0.9066	High	8.08	8.16	0.571	8.912	0.9091	High	8.08	8.15	0.601	9.375	0.9219	High	8.08	8.16	0.593	9.253	0.9214	High	8.09	8.16	0.612	9.551	0.9185	High	8.08	8.16	0.631	9.845	0.9061	High	8.08
R1021C_p110g	282	307	VGETPIKNFQWVRHCLKNGEEIHVVL	11.24	4	23	11.19	11.27	0.915	4.346	0.9168	High	11.19	11.27	0.933	4.434	0.9081	High	11.2	11.27	0.957	4.547	0.9225	High	11.19	11.27	2.779	13.205	0.9048	High	11.19	11.27	2.712	12.885	0.9016	High	11.19	11.27	2.781	13.215	0.9053	High	11.19	11.27	3.65	17.344	0.8952	High	11.19
R1021C_p110g	292	302	WVRHCLKNGEE	5.33	2	9	5.47	5.54	0.543	6.589	0.9368	High	5.46	5.53	0.529	6.424	0.9334	High	5.46	5.53	0.504	6.12	0.9265	High	5.46	5.53	1.57	19.069	0.9288	High	5.46	5.53	1.622	19.692	0.9293	High	5.47	5.54	1.635	19.855	0.9279	High	5.46	5.53	1.831	22.232	0.9297	High	5.46
R1021C_p110g	292	307	WVRHCLKNGEEIHVVL	8.69	4	14	8.72	8.79	0.588	4.594	0.9375	High	8.72	8.8	0.577	4.501	0.9247	High	8.72	8.8	0.591	4.614	0.9307	Medium	8.72	8.79	1.891	14.764	0.9345	High	8.72	8.79	1.895	14.791	0.9301	High	8.72	8.79	2.036	15.895	0.9254	Medium	8.72	8.79	2.669	20.837	0.9273	High	8.72
R1021C_p110g	308	315	DTPPDPAL	8.37	1	3	8.41	8.47	0.503	18.33	0.8557	Medium	8.41	8.48	0.482	17.552	0.871	Medium	8.41	8.48	0.472	17.207	0.8615	Medium	8.41	8.47	1.219	44.402	0.8627	Medium	8.41	8.48	1.185	43.154	0.8697	Medium	8.41	8.48	1.198	43.659	0.8622	Medium	8.41	8.48	1.497	54.523	0.8714	Medium	8.41
R1021C_p110g	308	317	DTPPDPALDE	7.85	1	5	7.85	7.93	0.61	13.336	0.867	Medium	7.86	7.92	0.574	12.536	0.8605	Medium	7.86	7.92	0.561	12.269	0.7874	Medium	7.85	7.92	1.191	26.035	0.8514	Medium	7.85	7.92	1.176	25.701	0.8544	Medium	7.85	7.93	1.242	27.151	0.821	Medium	7.85	7.92	1.782	38.95	0.869	Medium	7.85
R1021C_p110g	316	335	DEVRKEEWPLVDDCTGVTGY	12.39	2	17	12.58	12.64	6.029	38.759	0.9308	High	12.58	12.64	5.952	38.265	0.9027	High	12.58	12.65	6.098	39.204	0.9082	High	12.58	12.64	6.808	43.77	0.9112	High	12.58	12.65	6.527	41.963	0.9004	High	12.58	12.64	6.626	42.599	0.9089	High	12.58	12.65	7.339	47.181	0.9076	High	12.58
R1021C_p110g	316	335	DEVRKEEWPLVDDCTGVTGY	12.39	3	17	12.55	12.62	6.09	39.15	0.9087	Medium	12.55	12.62	5.975	38.411	0.8813	Medium	12.56	12.62	6.09	39.154	0.8956	Medium	12.55	12.62	6.875	44.198	0.8954	Medium	12.55	12.62	6.578	42.286	0.8845	Medium	12.55	12.62	6.695	43.038	0.9018	Medium	12.55	12.62	7.396	47.547	0.8806	Medium	12.55
R1021C_p110g	316	339	DEVRKEEWPLVDDCTGVTGYHEQL	11.9	2	21	11.9	11.98	7.381	38.411	0.8989	High	11.9	11.98	7.337	38.183	0.8756	High	11.91	11.98	7.413	38.579	0.8967	High	11.91	11.98	8.296	43.172	0.8831	High	11.91	11.98	7.879	41.005	0.8758	High	11.9	11.98	8.136	42.34	0.8906	High	11.91	11.98	8.871	46.165	0.8836	High	11.91
R1021C_p110g	317	335	EVRKEEWPLVDDCTGVTGY	12.3	3	16	12.31	12.37	5.221	35.662	0.8229	Medium	12.31	12.37	5.142	35.122	0.813	Medium	12.31	12.38	5.213	35.609	0.8231	Medium	12.31	12.38	6.067	41.442	0.8036	Medium	12.31	12.38	5.674	38.758	0.8097	Medium	12.31	12.37	5.831	39.83	0.8263	Medium	12.31	12.38	6.618	45.204	0.8124	Medium	12.31
R1021C_p110g	328	339	DCTGVTGYHEQL	8.95	1	10	8.87	8.93	5.166	56.462	0.734	Medium	8.87	8.94	5.188	56.696	0.7684	Medium	8.87	8.94	5.355	58.526	0.654	Medium	8.87	8.93	5.246	57.335	0.7638	Medium	8.87	8.94	5.225	57.105	0.7947	Medium	8.91	8.98	5.329	58.244	0.6961	Medium	8.87	8.94	5.405	59.069	0.7544	Medium	8.87
R1021C_p110g	336	350	HEQLTIHGKDHESVF	7.4	2	13	7.56	7.62	3.937	33.097	0.9135	High	7.56	7.62	3.783	31.805	0.9205	High	7.55	7.62	3.871	32.547	0.9195	High	7.55	7.62	3.852	32.383	0.9231	High	7.55	7.62	3.805	31.987	0.9255	High	7.55	7.62	4.12	34.635	0.9122	Medium	7.55	7.62	4.024	33.83	0.9153	High	7.55
R1021C_p110g	336	350	HEQLTIHGKDHESVF	7.4	3	13	7.53	7.6	3.941	33.131	0.9284	High	7.53	7.61	3.791	31.867	0.9198	High	7.53	7.6	3.849	32.361	0.9154	High	7.53	7.6	3.872	32.553	0.9335	High	7.53	7.6	3.845	32.322	0.9211	High	7.52	7.6	4.149	34.882	0.9001	High	7.53	7.6	4.033	33.907	0.9256	High	7.53
R1021C_p110g	340	350	TIHGKDHESVF	6.75	2	9	6.76	6.83	2.033	24.683	0.9149	High	6.77	6.83	1.952	23.699	0.9149	High	6.77	6.83	2.016	24.477	0.9129	High	6.76	6.83	2.052	24.916	0.9083	High	6.76	6.83	2.014	24.453	0.8957	High	6.76	6.83	2.133	25.901	0.9136	High	6.76	6.83	2.061	25.028	0.9183	High	6.76
R1021C_p110g	355	379	WDCDRKFRVKIRGIDIPVLPRNTDL	10.43	5	21	10.6	10.68	2.372	12.346	0.8953	Medium	10.59	10.67	2.399	12.486	0.8827	Medium	10.59	10.68	2.405	12.514	0.8932	Medium	10.59	10.67	3.444	17.924	0.9077	Medium	10.59	10.67	3.336	17.364	0.8977	Medium	10.59	10.67	3.388	17.634	0.9136	Medium	10.59	10.67	4.387	22.831	0.9072	Medium	10.59
R1021C_p110g	362	379	RVKIRGIDIPVLPRNTDL	9.87	4	14	9.87	9.94	2.49	19.438	0.7331	Medium	9.88	9.94	2.524	19.706	0.6925	Medium	9.88	9.95	2.536	19.8	0.81	Medium	9.87	9.94	3.323	25.944	0.7607	Medium	9.88	9.94	3.251	25.379	0.7524	Medium	9.87	9.94	3.299	25.755	0.7872	Medium	9.88	9.94	4.13	32.242	0.7841	Medium	9.88
R1021C_p110g	370	379	IPVLPRNTDL	9.61	2	7	9.55	9.61	3.27	51.057	0.916	Medium	9.55	9.62	3.225	50.344	0.8978	Medium	9.55	9.62	3.214	50.183	0.9261	Medium	9.55	9.61	4.022	62.792	0.9111	Medium	9.55	9.62	3.933	61.409	0.8911	Medium	9.55	9.61	3.985	62.219	0.9129	Medium	9.55	9.62	4.583	71.549	0.9007	Medium	9.55
R1021C_p110g	370	381	IPVLPRNTDLTV	10.05	2	9	10.2	10.27	2.934	35.633	0.8742	Medium	10.2	10.27	2.878	34.947	0.8397	Medium	10.21	10.27	2.939	35.686	0.9215	Medium	10.2	10.27	3.99	48.452	0.8852	Medium	10.2	10.27	3.946	47.919	0.8838	Medium	10.2	10.27	3.968	48.18	0.8743	Medium	10.2	10.27	5.019	60.952	0.9045	Medium	10.2
R1021C_p110g	382	394	FVEANIQHGQQVL	9.08	2	11	9.19	9.27	0.872	8.666	0.9315	High	9.2	9.27	0.841	8.353	0.9434	High	9.2	9.27	0.873	8.67	0.9257	High	9.19	9.27	1.6	15.893	0.9282	High	9.2	9.27	1.568	15.579	0.9302	High	9.19	9.27	1.629	16.184	0.9216	High	9.2	9.27	1.904	18.917	0.9226	High	9.2
R1021C_p110g	383	394	VEANIQHGQQVL	7.88	2	10	7.92	7.99	0.983	10.738	0.9316	High	7.92	7.99	0.922	10.076	0.935	High	7.91	7.99	0.966	10.555	0.9159	High	7.91	7.99	1.834	20.039	0.9303	High	7.91	7.99	1.766	19.305	0.9368	High	7.92	7.99	1.842	20.13	0.9209	High	7.91	7.99	2.151	23.51	0.9252	High	7.91
R1021C_p110g	386	394	NIQHGQQVL	7.23	1	7	7.37	7.44	0.925	14.439	0.874	Medium	7.37	7.45	0.856	13.372	0.8925	Medium	7.37	7.45	0.899	14.036	0.9062	High	7.37	7.44	1.737	27.126	0.8968	Medium	7.37	7.44	1.692	26.415	0.9117	High	7.37	7.44	1.785	27.876	0.893	High	7.37	7.44	2.068	32.289	0.8811	High	7.37
R1021C_p110g	395	407	CQRRTSPKPFTEE	5.48	2	9	5.63	5.7	0.894	10.852	0.9319	High	5.62	5.7	0.873	10.606	0.9284	High	5.62	5.7	0.89	10.812	0.9352	High	5.62	5.7	1.549	18.814	0.9332	High	5.62	5.7	1.626	19.745	0.9301	High	5.63	5.7	1.63	19.791	0.9408	High	5.62	5.7	2.343	28.457	0.929	High	5.62
R1021C_p110g	395	407	CQRRTSPKPFTEE	5.48	3	9	5.64	5.7	0.893	10.84	0.9348	High	5.63	5.7	0.854	10.366	0.9404	High	5.63	5.71	0.892	10.836	0.948	High	5.63	5.7	1.539	18.688	0.9554	High	5.63	5.71	1.613	19.589	0.9478	High	5.64	5.71	1.613	19.585	0.9564	High	5.63	5.71	2.362	28.677	0.9551	High	5.63
R1021C_p110g	417	428	SIKIKDLPKGAL	8.16	3	9	8.22	8.3	0.469	5.691	0.9502	High	8.23	8.3	0.468	5.684	0.9459	High	8.23	8.3	0.467	5.669	0.9466	High	8.22	8.3	1.322	16.052	0.9348	High	8.22	8.3	1.25	15.179	0.9332	High	8.23	8.31	1.301	15.795	0.9257	High	8.22	8.3	2.416	29.333	0.9417	High	8.22
R1021C_p110g	417	431	SIKIKDLPKGALLNL	10.49	3	12	10.6	10.66	0.466	4.241	0.9488	Medium	10.59	10.66	0.443	4.036	0.953	Medium	10.59	10.66	0.46	4.194	0.9387	Medium	10.59	10.66	1.161	10.573	0.9111	Medium	10.59	10.66	1.151	10.482	0.932	Medium	10.59	10.65	1.185	10.791	0.9314	Medium	10.59	10.66	2.136	19.45	0.9442	Medium	10.59
R1021C_p110g	461	466	LYYVNL	12.24	1	4	12.19	12.26	0.017	0.458	0.8628	Medium	12.19	12.26	0.042	1.157	0.8291	Medium	12.19	12.26	0.044	1.209	0.8773	Medium	12.19	12.26	0.045	1.236	0.854	Medium	12.19	12.26	0.027	0.733	0.846	Medium	12.19	12.26	0.041	1.122	0.8565	Medium	12.19	12.26	0.025	0.682	0.866	Medium	12.19
R1021C_p110g	463	468	YVNLLL	13.37	1	4	13.48	13.55	0.035	0.953	0.9023	Medium	13.47	13.54	0.044	1.199	0.8605	Medium	13.48	13.55	0.054	1.468	0.9185	Medium	13.47	13.54	0.101	2.747	0.8535	Medium	13.48	13.54	0.075	2.057	0.8798	Medium	13.47	13.54	0.113	3.093	0.8912	Medium	13.48	13.54	0.339	9.253	0.8873	Medium	13.48
R1021C_p110g	466	474	LLLIDHRFL	12.04	3	7	12.01	12.08	0.09	1.404	0.9118	High	12.01	12.08	0.116	1.806	0.8805	Medium	12.02	12.09	0.071	1.104	0.8704	Medium	12.01	12.08	0.345	5.385	0.8996	Medium	12.02	12.08	0.32	4.991	0.9001	Medium	12.01	12.08	0.319	4.98	0.9003	Medium	12.02	12.08	0.815	12.724	0.923	Medium	12.02
R1021C_p110g	467	475	LLIDHRFLL	12.02	3	7	12.06	12.13	0.087	1.357	0.8991	High	12.06	12.13	0.08	1.242	0.908	High	12.07	12.14	0.047	0.729	0.9143	High	12.07	12.13	0.351	5.486	0.9261	High	12.07	12.13	0.293	4.578	0.9337	High	12.06	12.13	0.361	5.631	0.9252	High	12.07	12.13	0.816	12.748	0.9227	High	12.07
R1021C_p110g	467	479	LLIDHRFLLRRGE	8.97	4	11	9.12	9.19	0.524	5.21	0.9507	High	9.12	9.19	0.5	4.968	0.9509	High	9.12	9.19	0.522	5.185	0.9573	High	9.12	9.19	1.471	14.618	0.9463	High	9.12	9.19	1.434	14.244	0.9428	High	9.12	9.19	1.48	14.703	0.9517	High	9.12	9.19	2.242	22.275	0.9437	High	9.12
R1021C_p110g	467	480	LLIDHRFLLRRGEY	9.61	4	12	9.58	9.65	0.509	4.633	0.9092	Medium	9.58	9.65	0.515	4.689	0.9054	Medium	9.59	9.65	0.512	4.662	0.9078	High	9.58	9.65	1.446	13.166	0.9121	High	9.58	9.65	1.374	12.518	0.9107	High	9.58	9.65	1.407	12.81	0.9113	High	9.58	9.65	2.151	19.587	0.8937	Medium	9.58
R1021C_p110g	468	480	LIDHRFLLRRGEY	8.49	2	11	8.54	8.61	0.558	5.54	0.8287	Medium	8.54	8.61	0.575	5.718	0.7719	Medium	8.54	8.61	0.528	5.245	0.8674	Medium	8.54	8.61	1.598	15.878	0.7703	Medium	8.54	8.61	1.529	15.194	0.7533	Medium	8.55	8.62	1.565	15.551	0.8027	Medium	8.54	8.61	2.236	22.217	0.7791	Medium	8.54
R1021C_p110g	485	497	WQISGKGEDQGSF	9.72	2	11	9.84	9.91	5.658	56.216	0.9088	High	9.84	9.91	5.642	56.055	0.9048	High	9.85	9.91	5.65	56.131	0.9143	High	9.84	9.91	5.783	57.453	0.918	High	9.84	9.91	5.691	56.546	0.9085	High	9.84	9.91	5.861	58.23	0.9166	High	9.84	9.91	6.306	62.655	0.8982	High	9.84
R1021C_p110g	498	513	NADKLTSATNPDKENS	5.22	2	13	5.21	5.28	2.514	21.132	0.7737	Medium	5.2	5.28	2.565	21.563	0.782	Medium	5.2	5.28	2.458	20.666	0.8064	Medium	5.2	5.28	4.057	34.11	0.7916	Medium	5.2	5.28	4.251	35.734	0.809	Medium	5.21	5.28	4.111	34.557	0.8202	Medium	5.2	5.28	5.816	48.893	0.8347	Medium	5.2
R1021C_p110g	498	515	NADKLTSATNPDKENSMS	6	3	15	6.08	6.17	2.443	17.801	0.9084	High	6.09	6.17	2.383	17.364	0.9185	High	6.09	6.17	2.396	17.454	0.8998	High	6.08	6.17	4.022	29.307	0.9198	High	6.08	6.17	4.04	29.438	0.9145	High	6.09	6.17	4.096	29.845	0.9127	High	6.08	6.17	5.883	42.86	0.9084	High	6.08
R1021C_p110g	500	515	DKLTSATNPDKENSMS	6.02	2	13	5.92	6	2.158	18.145	0.8775	Medium	5.92	6.01	2.057	17.294	0.8695	Medium	5.93	6	2.107	17.715	0.8548	Medium	5.92	6	3.494	29.37	0.823	Medium	5.92	6	3.478	29.243	0.8381	Medium	5.93	6.01	3.539	29.753	0.8203	Medium	5.92	6	5.543	46.601	0.833	Medium	5.92
R1021C_p110g	514	519	MSISIL	12.49	1	4	12.53	12.6	0.07	1.922	0.7611	Medium	12.53	12.6	0.045	1.234	0.7257	Medium	12.54	12.61	0.047	1.274	0.8005	Medium	12.53	12.6	0.043	1.165	0.7296	Medium	12.54	12.6	0.016	0.44	0.7146	Medium	12.53	12.6	0.099	2.702	0.7698	Medium	12.54	12.6	0.022	0.602	0.7538	Medium	12.54
R1021C_p110g	520	529	LDNYCHPIAL	10.65	2	7	10.74	10.8	2.61	40.755	0.7771	Medium	10.73	10.8	2.567	40.078	0.752	Medium	10.73	10.8	2.536	39.59	0.7638	Medium	10.73	10.8	3.387	52.885	0.7352	Medium	10.77	10.83	3.352	52.336	0.6937	Medium	10.74	10.81	3.358	52.426	0.7524	Medium	10.73	10.8	3.555	55.507	0.7625	Medium	10.73
R1021C_p110g	520	551	LDNYCHPIALPKHQPTPDPEGDRVRAEMPNQL	8.81	4	24	9.04	9.11	10.48	47.721	0.9387	High	9.04	9.11	10.247	46.663	0.9277	High	9.04	9.12	10.138	46.165	0.9069	High	9.04	9.11	11.292	51.421	0.9323	High	9.04	9.11	11.146	50.756	0.9306	High	9.04	9.11	11.354	51.702	0.925	High	9.04	9.11	11.512	52.425	0.9293	High	9.04
R1021C_p110g	520	556	LDNYCHPIALPKHQPTPDPEGDRVRAEMPNQLRKQLE	8.61	5	29	8.61	8.68	12.674	47.764	0.8346	Medium	8.61	8.69	12.25	46.165	0.779	Medium	8.61	8.69	12.386	46.677	0.8671	High	8.61	8.68	14.377	54.183	0.8235	Medium	8.61	8.69	14.061	52.991	0.8173	Medium	8.62	8.68	14.437	54.408	0.8731	High	8.61	8.68	14.599	55.018	0.8363	Medium	8.61
R1021C_p110g	523	551	YCHPIALPKHQPTPDPEGDRVRAEMPNQL	8.37	5	21	8.52	8.59	9.473	49.3	0.818	Medium	8.53	8.59	9.267	48.228	0.8205	Medium	8.53	8.59	9.09	47.306	0.8124	Medium	8.52	8.59	10.067	52.391	0.8224	Medium	8.53	8.59	9.955	51.807	0.8298	Medium	8.53	8.6	10.194	53.052	0.8122	Medium	8.53	8.59	10.064	52.377	0.8294	Medium	8.53
R1021C_p110g	557	573	AIIATDPLNPLTAEDKE	10.7	2	13	10.85	10.91	5.401	45.406	0.8987	Medium	10.84	10.91	5.28	44.384	0.8989	High	10.84	10.91	5.357	45.039	0.8859	High	10.84	10.91	7.388	62.113	0.9086	High	10.84	10.91	7.247	60.926	0.9128	High	10.85	10.91	7.254	60.983	0.9023	High	10.84	10.91	7.821	65.753	0.9106	High	10.84
R1021C_p110g	557	578	AIIATDPLNPLTAEDKELLWHF	13.73	3	18	13.8	13.88	6.242	37.898	0.8039	Medium	13.8	13.88	5.893	35.78	0.791	Medium	13.8	13.87	6.081	36.922	0.8006	Medium	13.79	13.87	9.322	56.597	0.8126	Medium	13.79	13.87	9.156	55.59	0.7947	Medium	13.79	13.87	9.207	55.899	0.8082	Medium	13.79	13.87	10.311	62.608	0.8266	Medium	13.79
R1021C_p110g	557	580	AIIATDPLNPLTAEDKELLWHFRY	12.83	4	20	12.9	12.99	6.782	37.06	0.7976	Medium	12.9	12.98	6.445	35.221	0.7689	Medium	12.91	12.98	6.55	35.79	0.7624	Medium	12.9	12.98	10.212	55.803	0.7324	Medium	12.92	13.01	10.204	55.759	0.7012	Medium	12.9	12.98	10.043	54.879	0.7477	Medium	12.91	12.98	11.198	61.193	0.7309	Medium	12.91
R1021C_p110g	558	569	IIATDPLNPLTA	11.53	1	8	11.54	11.61	4.161	56.841	0.8276	Medium	11.59	11.66	4.071	55.615	0.8224	Medium	11.6	11.67	4.012	54.807	0.8479	Medium	11.6	11.66	5.399	73.759	0.8639	Medium	11.6	11.66	5.365	73.294	0.8715	Medium	11.59	11.66	5.337	72.911	0.8592	Medium	11.6	11.66	5.528	75.512	0.8753	High	11.6
R1021C_p110g	558	570	IIATDPLNPLTAE	11.44	1	9	11.53	11.6	4.253	51.643	0.8252	Medium	11.54	11.61	4.21	51.122	0.8512	Medium	11.54	11.62	4.229	51.349	0.8232	Medium	11.54	11.61	5.719	69.45	0.8405	Medium	11.54	11.61	5.592	67.906	0.8384	Medium	11.54	11.61	5.624	68.297	0.7898	Medium	11.54	11.61	5.735	69.638	0.8636	Medium	11.54
R1021C_p110g	558	571	IIATDPLNPLTAED	11.47	1	10	11.52	11.59	4.586	50.118	0.8533	Medium	11.52	11.59	4.385	47.919	0.7859	Medium	11.52	11.59	4.457	48.708	0.8161	Medium	11.52	11.59	5.769	63.044	0.8204	Medium	11.47	11.56	5.56	60.761	0.7002	Medium	11.52	11.59	5.72	62.515	0.7811	Medium	11.52	11.59	5.989	65.454	0.8432	Medium	11.52
R1021C_p110g	558	573	IIATDPLNPLTAEDKE	10.38	2	12	10.52	10.6	5.027	45.779	0.8297	Medium	10.51	10.59	5.104	46.485	0.8103	Medium	10.52	10.59	4.993	45.472	0.801	Medium	10.51	10.59	6.752	61.494	0.8397	Medium	10.51	10.59	6.592	60.035	0.8311	Medium	10.51	10.59	6.564	59.78	0.8185	Medium	10.51	10.59	7.084	64.518	0.8328	Medium	10.51
R1021C_p110g	558	578	IIATDPLNPLTAEDKELLWHF	13.68	3	17	13.82	13.9	5.522	35.502	0.9055	Medium	13.83	13.9	5.228	33.61	0.9082	Medium	13.82	13.9	5.282	33.956	0.9039	Medium	13.82	13.89	7.914	50.875	0.8575	Medium	13.82	13.9	7.998	51.417	0.9058	Medium	13.82	13.89	8.053	51.768	0.9077	Medium	13.82	13.9	8.81	56.638	0.8996	Medium	13.82
R1021C_p110g	574	578	LLWHF	13.11	1	3	13.16	13.23	0.651	23.733	0.8727	Medium	13.15	13.22	0.616	22.428	0.8388	Medium	13.16	13.23	0.665	24.224	0.8223	Medium	13.16	13.22	1.166	42.492	0.8282	Medium	13.16	13.22	1.136	41.387	0.8151	Medium	13.15	13.22	1.187	43.255	0.8067	Medium	13.16	13.22	1.296	47.203	0.8432	Medium	13.16
R1021C_p110g	574	592	LLWHFRYESLKHPKAYPKL	9.63	4	15	9.45	9.52	3.596	26.203	0.8528	Medium	9.45	9.52	3.493	25.451	0.8325	Medium	9.45	9.53	3.475	25.32	0.8493	Medium	9.45	9.52	4.476	32.609	0.8698	Medium	9.45	9.52	4.388	31.969	0.8822	Medium	9.45	9.52	4.471	32.574	0.8767	Medium	9.45	9.52	4.801	34.982	0.8755	Medium	9.45
R1021C_p110g	579	592	RYESLKHPKAYPKL	6.32	4	10	6.29	6.36	3.655	39.944	0.9043	High	6.3	6.37	3.485	38.092	0.9025	High	6.3	6.36	3.531	38.593	0.9057	High	6.29	6.36	4.33	47.319	0.9052	High	6.29	6.36	4.385	47.921	0.9035	High	6.29	6.36	4.448	48.61	0.9109	High	6.29	6.36	4.452	48.66	0.915	High	6.29
R1021C_p110g	593	601	FSSVKWGQQ	8.81	1	7	8.93	9.02	3.894	60.792	0.8344	Medium	8.9	8.96	3.808	59.456	0.8784	Medium	8.94	9.01	3.741	58.412	0.868	Medium	8.89	8.96	4.541	70.905	0.882	Medium	8.9	8.96	4.458	69.603	0.8882	High	8.89	8.96	4.539	70.872	0.8619	Medium	8.89	8.96	4.722	73.716	0.8681	Medium	8.89
R1021C_p110g	593	607	FSSVKWGQQEIVAKT	9.12	3	13	9.15	9.23	6.487	54.535	0.9164	High	9.16	9.23	6.282	52.813	0.9226	High	9.16	9.23	6.185	51.999	0.9074	High	9.15	9.23	8.143	68.453	0.8913	High	9.15	9.23	8.135	68.387	0.8921	High	9.15	9.23	8.221	69.111	0.8819	High	9.15	9.23	8.617	72.441	0.9248	High	9.15
R1021C_p110g	602	607	EIVAKT	4.54	1	4	4.67	4.74	1.802	49.244	0.9199	Medium	4.67	4.74	1.738	47.485	0.9409	Medium	4.67	4.74	1.795	49.051	0.8509	Medium	4.67	4.74	2.669	72.934	0.9398	Medium	4.71	4.77	2.675	73.095	0.9353	Medium	4.68	4.75	2.656	72.563	0.9211	Medium	4.67	4.74	2.892	79.019	0.9272	Medium	4.67
R1021C_p110g	606	611	KTYQLL	9.74	2	4	9.84	9.92	1.447	39.531	0.9459	High	9.84	9.92	1.378	37.643	0.889	Medium	9.85	9.92	1.441	39.364	0.892	High	9.84	9.92	2.515	68.703	0.9351	High	9.84	9.92	2.482	67.809	0.9425	High	9.84	9.92	2.526	69.019	0.9511	High	9.84	9.92	2.887	78.881	0.9346	Medium	9.84
R1021C_p110g	611	622	LARREVWDQSAL	9.4	2	10	9.45	9.52	4.764	52.064	0.9034	High	9.45	9.52	4.659	50.917	0.9119	High	9.45	9.53	4.703	51.399	0.9036	High	9.45	9.52	5.267	57.563	0.8973	High	9.45	9.52	5.208	56.92	0.8975	High	9.49	9.56	5.35	58.466	0.8793	Medium	9.45	9.52	5.372	58.707	0.8908	High	9.45
R1021C_p110g	612	622	ARREVWDQSAL	9.08	3	9	9.12	9.19	4.604	55.907	0.8911	High	9.12	9.19	4.582	55.64	0.8996	High	9.12	9.19	4.572	55.524	0.8582	Medium	9.12	9.19	5.05	61.329	0.9187	High	9.12	9.19	5.006	60.788	0.9014	High	9.12	9.19	5.121	62.186	0.8864	Medium	9.12	9.19	5.116	62.125	0.9087	High	9.12
R1021C_p110g	623	630	DVGLTMQL	11.91	1	6	12.09	12.16	1.383	25.195	0.887	Medium	12.09	12.16	1.376	25.068	0.8762	Medium	12.09	12.17	1.343	24.468	0.8997	Medium	12.07	12.13	3.177	57.877	0.9021	Medium	12	12.15	3.042	55.416	0.907	Medium	12.06	12.18	3.029	55.174	0.8471	Medium	12.09	12.17	3.972	72.35	0.8769	Medium	12.09
R1021C_p110g	631	635	LDCNF	10.64	1	3	10.77	10.85	0.836	30.447	0.9089	Medium	10.76	10.84	0.79	28.793	0.9049	Medium	10.77	10.84	0.776	28.264	0.9054	Medium	10.71	10.8	1.453	52.919	0.9162	Medium	10.79	10.87	1.382	50.349	0.8954	Medium	10.76	10.85	1.406	51.224	0.9174	Medium	10.77	10.84	1.601	58.326	0.9027	Medium	10.77
R1021C_p110g	636	642	SDENVRA	4.34	1	5	4.43	4.49	1.063	23.243	0.9369	High	4.43	4.5	1.01	22.071	0.934	High	4.43	4.5	1.033	22.571	0.931	High	4.44	4.51	2.124	46.415	0.9285	High	4.35	4.43	2.034	44.452	0.9086	Medium	4.39	4.47	2.031	44.402	0.9214	High	4.43	4.5	3.029	66.215	0.9145	High	4.43
R1021C_p110g	643	654	IAVQKLESLEDD	9.34	2	10	9.2	9.56	1.42	15.515	0.8477	Medium	9.21	9.56	1.396	15.261	0.8301	Medium	9.21	9.56	1.354	14.794	0.8328	Medium	9.2	9.56	2.426	26.51	0.8086	Medium	9.21	9.56	2.308	25.227	0.8343	Medium	9.2	9.56	2.274	24.85	0.8018	Medium	9.2	9.56	3.806	41.597	0.8337	Medium	9.34
R1021C_p110g	643	657	IAVQKLESLEDDDVL	11.41	2	13	11.33	11.41	1.241	10.436	0.8648	Medium	11.33	11.41	1.223	10.279	0.8655	Medium	11.34	11.41	1.257	10.564	0.8546	Medium	11.34	11.41	2.273	19.111	0.8398	Medium	11.34	11.41	2.12	17.822	0.8383	Medium	11.33	11.41	2.233	18.771	0.851	Medium	11.34	11.41	3.88	32.621	0.8447	Medium	11.34
R1021C_p110g	643	662	IAVQKLESLEDDDVLHYLLQ	13.49	3	18	13.51	13.59	0.867	5.266	0.8701	Medium	13.51	13.58	0.861	5.229	0.8694	Medium	13.51	13.59	0.91	5.527	0.8685	Medium	13.51	13.58	2.001	12.149	0.834	Medium	13.51	13.58	1.817	11.032	0.8325	Medium	13.51	13.58	1.893	11.492	0.8477	Medium	13.51	13.59	3.81	23.136	0.7892	Medium	13.51
R1021C_p110g	643	663	IAVQKLESLEDDDVLHYLLQL	14.1	3	19	14.14	14.2	0.792	4.557	0.8767	Medium	14.14	14.2	0.759	4.366	0.8767	Medium	14.13	14.2	0.815	4.685	0.8795	Medium	14.13	14.2	1.872	10.77	0.8554	Medium	14.13	14.2	1.749	10.063	0.8593	Medium	14.13	14.2	1.813	10.426	0.8691	Medium	14.13	14.2	3.856	22.179	0.8609	Medium	14.13
R1021C_p110g	654	662	DDVLHYLLQ	12.91	2	7	13.03	13.1	0.079	1.227	0.9194	Medium	13.02	13.09	0.101	1.58	0.8757	Medium	13.03	13.09	0.061	0.945	0.914	Medium	13.02	13.09	0.359	5.606	0.8785	Medium	13.02	13.09	0.373	5.831	0.9027	Medium	13.02	13.09	0.336	5.243	0.8974	Medium	13.02	13.09	1.222	19.073	0.8721	Medium	13.02
R1021C_p110g	658	663	HYLLQL	11.93	1	4	11.82	11.9	0.027	0.745	0.9268	Medium	11.82	11.9	0.058	1.58	0.906	Medium	11.83	11.9	0.034	0.933	0.9003	Medium	11.82	11.9	0.163	4.458	0.9129	Medium	11.82	11.9	0.144	3.943	0.9266	Medium	11.82	11.9	0.14	3.828	0.9174	Medium	11.82	11.9	0.545	14.887	0.9244	Medium	11.82
R1021C_p110g	663	677	LVQAVKFEPYHDSAL	9.66	3	12	9.77	9.84	0.589	5.362	0.9068	High	9.77	9.84	0.559	5.095	0.9267	High	9.77	9.85	0.585	5.326	0.9243	High	9.77	9.84	0.773	7.042	0.9284	High	9.77	9.84	0.741	6.746	0.9284	High	9.76	9.84	0.772	7.035	0.9213	High	9.77	9.84	1.071	9.75	0.9274	High	9.77
R1021C_p110g	664	677	VQAVKFEPYHDSAL	9.29	3	11	9.31	9.39	0.596	5.918	0.9129	High	9.31	9.39	0.551	5.47	0.9132	High	9.32	9.39	0.575	5.717	0.9127	High	9.31	9.39	0.787	7.817	0.914	High	9.31	9.39	0.746	7.408	0.9048	High	9.31	9.39	0.798	7.931	0.9047	High	9.31	9.39	1.093	10.857	0.9105	High	9.31
R1021C_p110g	666	677	AVKFEPYHDSAL	8.87	2	9	8.97	9.04	0.597	7.252	0.8936	High	8.97	9.04	0.571	6.931	0.9016	Medium	8.97	9.04	0.569	6.909	0.9015	Medium	8.97	9.04	0.781	9.483	0.8888	Medium	8.97	9.04	0.818	9.933	0.8956	Medium	8.97	9.04	0.803	9.747	0.888	Medium	8.97	9.04	1.091	13.243	0.8877	Medium	8.97
R1021C_p110g	666	677	AVKFEPYHDSAL	8.87	3	9	9.05	9.13	0.565	6.855	0.9381	High	9.05	9.13	0.559	6.783	0.9318	High	9.06	9.13	0.556	6.75	0.9351	High	9.05	9.13	0.784	9.524	0.9079	High	9.05	9.13	0.758	9.206	0.9331	High	9.05	9.13	0.779	9.458	0.9135	High	9.05	9.13	1.051	12.767	0.9263	High	9.05
R1021C_p110g	681	697	LLKRGLRNKRIGHFLFW	10.27	4	15	10.29	10.35	0.053	0.389	0.9289	High	10.29	10.35	0.066	0.478	0.9262	High	10.29	10.36	0.057	0.419	0.9305	High	10.29	10.35	0.07	0.509	0.9263	High	10.29	10.36	0.069	0.505	0.9322	High	10.29	10.35	0.051	0.371	0.9214	High	10.29	10.35	0.077	0.563	0.898	Medium	10.29
R1021C_p110g	681	697	LLKRGLRNKRIGHFLFW	10.27	5	15	10.17	10.71	0.029	0.21	0.9455	High	10.17	10.71	0.041	0.299	0.9445	High	10.17	10.71	0.046	0.334	0.9437	High	10.17	10.71	0.035	0.252	0.9456	High	10.17	10.71	0.051	0.374	0.9405	High	10.17	10.71	0.041	0.298	0.9437	High	10.17	10.71	0.077	0.563	0.9395	High	10.17
R1021C_p110g	697	713	WFLRSEIAQSRHYQQRF	9.66	4	15	9.75	9.82	0.463	3.377	0.9403	High	9.75	9.82	0.469	3.42	0.9308	High	9.75	9.82	0.445	3.245	0.932	High	9.75	9.82	0.946	6.891	0.9339	High	9.75	9.82	0.894	6.511	0.9336	High	9.75	9.82	0.911	6.634	0.9364	High	9.75	9.82	2.105	15.338	0.9165	High	9.75
R1021C_p110g	698	713	FLRSEIAQSRHYQQRF	7.78	4	14	7.68	7.75	0.602	4.696	0.9197	Medium	7.68	7.76	0.581	4.538	0.9202	Medium	7.68	7.76	0.608	4.744	0.9077	Medium	7.68	7.75	1.159	9.049	0.9241	Medium	7.68	7.75	1.068	8.34	0.9173	Medium	7.68	7.76	1.198	9.355	0.9171	Medium	7.68	7.75	2.439	19.04	0.9229	Medium	7.68
R1021C_p110g	700	713	RSEIAQSRHYQQRF	5.79	4	12	5.82	5.89	0.484	4.407	0.9347	High	5.82	5.89	0.465	4.235	0.9401	High	5.83	5.89	0.49	4.458	0.9166	Medium	5.82	5.89	0.961	8.756	0.9397	High	5.82	5.89	0.979	8.919	0.9262	High	5.83	5.9	1	9.107	0.9168	Medium	5.82	5.89	2.048	18.653	0.9201	High	5.82
R1021C_p110g	714	718	AVILE	8.53	1	3	8.59	8.66	0.009	0.32	0.8265	Medium	8.59	8.66	0.068	2.459	0.8142	Medium	8.59	8.66	0.035	1.268	0.8448	Medium	8.59	8.66	0.079	2.882	0.8232	Medium	8.59	8.66	0.017	0.622	0.8415	Medium	8.6	8.66	0.032	1.148	0.8544	Medium	8.59	8.66	0.102	3.734	0.8102	Medium	8.63
R1021C_p110g	714	719	AVILEA	9.39	1	4	9.24	9.3	0.03	0.827	0.8774	Medium	9.24	9.31	0.008	0.223	0.8666	Medium	9.24	9.31	0.017	0.475	0.8879	Medium	9.24	9.3	0.012	0.336	0.8529	Medium	9.24	9.31	0.017	0.474	0.8859	Medium	9.24	9.3	0.021	0.561	0.8862	Medium	9.24	9.31	0.031	0.852	0.8502	Medium	9.24
R1021C_p110g	720	729	YLRGCGTAML	9.99	2	8	10.18	10.25	0.146	2	0.9361	High	10.19	10.25	0.125	1.702	0.9333	High	10.19	10.26	0.149	2.033	0.9217	High	10.18	10.25	0.494	6.746	0.9419	High	10.19	10.25	0.506	6.907	0.9428	High	10.18	10.25	0.511	6.975	0.9101	High	10.19	10.25	1.166	15.934	0.9245	High	10.19
R1021C_p110g	720	731	YLRGCGTAMLHD	8.49	3	10	8.48	8.55	0.161	1.762	0.74	Medium	8.48	8.55	0.176	1.921	0.8102	Medium	8.49	8.55	0.173	1.888	0.7706	Medium	8.48	8.55	0.53	5.796	0.7589	Medium	8.48	8.55	0.572	6.254	0.781	Medium	8.49	8.56	0.616	6.736	0.7926	Medium	8.48	8.55	1.408	15.383	0.7325	Medium	8.48
R1021C_p110g	730	737	HDFTQQVQ	6.36	2	6	6.32	6.39	0.072	1.32	0.9171	Medium	6.33	6.4	0.062	1.126	0.9045	Medium	6.33	6.4	0.086	1.571	0.8851	Medium	6.32	6.39	0.082	1.489	0.907	Medium	6.33	6.39	0.082	1.493	0.9032	Medium	6.32	6.39	0.094	1.704	0.8826	Medium	6.33	6.39	0.121	2.207	0.8892	Medium	6.33
R1021C_p110g	730	738	HDFTQQVQV	8.32	1	7	8.3	8.36	0.055	0.854	0.8325	Medium	8.36	8.43	0.08	1.246	0.8127	Medium	8.3	8.37	0.087	1.351	0.8117	Medium	8.37	8.45	0.098	1.532	0.7628	Medium	8.3	8.37	0.091	1.424	0.837	Medium	8.31	8.36	0.115	1.799	0.7924	Medium	8.3	8.37	0.118	1.841	0.7884	Medium	8.3
R1021C_p110g	732	737	FTQQVQ	5.63	1	4	5.54	5.62	0.057	1.551	0.8677	Medium	5.54	5.61	0.052	1.434	0.8321	Medium	5.59	5.66	0.042	1.153	0.7885	Medium	5.54	5.61	0.057	1.55	0.8328	Medium	5.55	5.61	0.054	1.469	0.8066	Medium	5.55	5.62	0.121	3.302	0.7681	Medium	5.55	5.61	0.181	4.945	0.8283	Medium	5.55
R1021C_p110g	748	767	DIKSLSAEKYDVSSQVISQL	11.14	3	18	11.04	11.12	11.26	68.368	0.9067	High	11.04	11.12	11.488	69.754	0.8863	High	11.05	11.12	11.584	70.334	0.8952	High	11.04	11.12	11.76	71.4	0.9215	High	11.04	11.12	11.616	70.527	0.9068	High	11.04	11.12	11.793	71.604	0.9169	High	11.04	11.12	11.737	71.263	0.9206	High	11.04
R1021C_p110g	748	782	DIKSLSAEKYDVSSQVISQLKQKLENLQNSQLPES	12.49	5	32	12.43	12.51	15.436	52.718	0.8678	High	12.43	12.51	15.271	52.154	0.857	High	12.44	12.51	15.595	53.261	0.8674	High	12.43	12.51	20.094	68.626	0.8685	High	12.44	12.51	19.882	67.903	0.863	High	12.43	12.51	20.017	68.363	0.8763	High	12.44	12.51	21.238	72.533	0.859	High	12.44
R1021C_p110g	755	782	EKYDVSSQVISQLKQKLENLQNSQLPES	12.1	3	25	12.18	12.26	11.144	48.717	0.836	Medium	12.18	12.26	10.87	47.518	0.8096	Medium	12.19	12.26	11.053	48.317	0.8489	Medium	12.18	12.26	15.73	68.766	0.8206	Medium	12.18	12.26	15.552	67.987	0.8247	Medium	12.18	12.26	15.675	68.523	0.8349	Medium	12.18	12.26	16.878	73.783	0.7959	Medium	12.18
R1021C_p110g	755	782	EKYDVSSQVISQLKQKLENLQNSQLPES	12.1	4	25	12.02	12.47	11.14	48.701	0.8358	Medium	12.02	12.47	11.011	48.134	0.8051	Medium	12.03	12.47	11.169	48.827	0.8462	Medium	12.02	12.47	15.863	69.348	0.8306	Medium	12.02	12.47	15.655	68.438	0.8247	Medium	12.02	12.47	15.762	68.906	0.8356	Medium	12.02	12.47	16.956	74.126	0.835	Medium	12.02
R1021C_p110g	762	782	QVISQLKQKLENLQNSQLPES	10.58	2	18	10.51	10.58	7.572	45.977	0.8819	High	10.5	10.57	7.519	45.651	0.8831	Medium	10.51	10.58	7.673	46.59	0.8274	Medium	10.5	10.57	12.242	74.329	0.8456	Medium	10.54	10.61	12.052	73.174	0.8702	Medium	10.5	10.57	12.175	73.921	0.8038	Medium	10.51	10.57	13.44	81.605	0.8446	Medium	10.51
R1021C_p110g	767	782	LKQKLENLQNSQLPES	7.48	2	13	7.44	7.5	4.292	36.08	0.8379	Medium	7.44	7.51	4.13	34.723	0.8324	Medium	7.44	7.5	4.208	35.379	0.7612	Medium	7.43	7.5	7.249	60.937	0.8795	Medium	7.43	7.5	7.251	60.956	0.8594	Medium	7.43	7.5	7.309	61.447	0.8231	Medium	7.43	7.5	8.584	72.162	0.8852	Medium	7.43
R1021C_p110g	768	782	KQKLENLQNSQLPES	7.13	2	12	7.14	7.21	4.344	39.562	0.9256	High	7.14	7.2	4.024	36.645	0.9011	High	7.13	7.2	4.105	37.382	0.8964	High	7.13	7.2	6.847	62.357	0.9329	High	7.13	7.2	6.779	61.74	0.9255	High	7.13	7.2	6.897	62.817	0.9234	High	7.13	7.2	8.002	72.876	0.9177	High	7.13
R1021C_p110g	783	796	FRVPYDPGLKAGAL	10.16	3	10	10.18	10.25	0.246	2.686	0.8094	Medium	10.18	10.25	0.247	2.701	0.8107	Medium	10.18	10.26	0.262	2.862	0.7789	Medium	10.18	10.25	0.38	4.151	0.8033	Medium	10.18	10.25	0.416	4.548	0.8068	Medium	10.18	10.25	0.543	5.939	0.8036	Medium	10.18	10.25	1.935	21.153	0.8757	Medium	10.18
R1021C_p110g	797	812	AIEKCKVMASKKKPLW	6.81	4	13	6.95	7.03	2.247	18.893	0.9264	High	6.96	7.04	1.948	16.377	0.904	High	6.96	7.03	2.106	17.706	0.9015	High	6.95	7.03	2.559	21.509	0.9039	High	6.96	7.03	2.53	21.268	0.9103	High	6.95	7.03	2.695	22.657	0.903	High	6.96	7.03	3.826	32.161	0.931	High	6.96
R1021C_p110g	797	813	AIEKCKVMASKKKPLWL	8.29	2	14	8.12	8.2	1.86	14.516	0.8954	High	8.12	8.2	1.801	14.059	0.8979	High	8.12	8.2	1.893	14.778	0.8634	Medium	8.12	8.2	2.403	18.758	0.8831	Medium	8.12	8.2	2.382	18.598	0.8814	High	8.13	8.2	2.544	19.856	0.8643	Medium	8.12	8.2	3.699	28.873	0.9008	High	8.12
R1021C_p110g	797	815	AIEKCKVMASKKKPLWLEF	10.46	4	16	10.38	10.46	1.43	9.77	0.884	Medium	10.38	10.45	1.446	9.877	0.8883	Medium	10.38	10.46	1.507	10.296	0.883	High	10.38	10.45	1.933	13.204	0.8772	High	10.38	10.46	1.907	13.028	0.8778	Medium	10.38	10.45	1.882	12.859	0.8723	High	10.38	10.46	2.809	19.186	0.8863	High	10.41
R1021C_p110g	800	812	KCKVMASKKKPLW	6.04	2	10	6.06	6.13	1.639	17.91	0.8825	Medium	6.07	6.14	1.549	16.929	0.8817	Medium	6.07	6.14	1.707	18.651	0.8361	Medium	6.06	6.13	2.192	23.957	0.8708	Medium	6.07	6.13	2.163	23.638	0.8911	Medium	6.07	6.14	2.238	24.464	0.8471	Medium	6.07	6.13	3.02	33.01	0.8784	Medium	6.07
R1021C_p110g	802	815	KVMASKKKPLWLEF	10.71	4	11	10.85	10.91	0.825	8.196	0.9278	Medium	10.84	10.91	0.919	9.128	0.9156	Medium	10.89	10.95	0.899	8.936	0.9106	Medium	10.84	10.91	1.225	12.167	0.8949	Medium	10.84	10.91	1.243	12.351	0.8816	Medium	10.85	10.91	1.181	11.737	0.8944	Medium	10.84	10.91	1.479	14.698	0.9059	Medium	10.84
R1021C_p110g	814	823	EFKCADPTAL	9.48	1	7	9.47	9.55	1.34	20.923	0.7875	Medium	9.47	9.55	1.348	21.051	0.7896	Medium	9.48	9.55	1.327	20.719	0.732	Medium	9.47	9.55	3.208	50.085	0.8076	Medium	9.47	9.55	3.118	48.684	0.8215	Medium	9.47	9.55	3.283	51.258	0.7387	Medium	9.47	9.55	3.87	60.428	0.8117	Medium	9.47
R1021C_p110g	814	842	EFKCADPTALSNETIGIIFKHGDDLRQDM	12.57	4	26	12.57	12.64	3.88	16.311	0.8478	Medium	12.57	12.64	3.92	16.476	0.8069	Medium	12.57	12.65	3.926	16.503	0.7728	Medium	12.57	12.64	7.457	31.345	0.8011	Medium	12.57	12.65	7.117	29.917	0.7801	Medium	12.57	12.64	7.406	31.132	0.7819	Medium	12.57	12.65	9.193	38.644	0.8083	Medium	12.57
R1021C_p110g	816	823	KCADPTAL	7	1	5	6.93	7	1.289	28.182	0.9129	High	6.94	7.01	1.166	25.483	0.8527	Medium	6.93	7.01	1.233	26.962	0.8929	High	6.93	7	2.651	57.947	0.9013	High	6.93	7.01	2.565	56.064	0.8894	High	6.93	7	2.624	57.358	0.8861	Medium	6.93	7.01	3.256	71.17	0.8817	Medium	6.93
R1021C_p110g	816	825	KCADPTALSN	5.74	2	7	5.68	5.77	2.458	38.369	0.9067	Medium	5.68	5.77	2.49	38.874	0.8948	Medium	5.68	5.77	2.431	37.959	0.9138	Medium	5.68	5.77	4.01	62.6	0.9203	Medium	5.68	5.77	3.961	61.839	0.9239	Medium	5.69	5.78	3.972	62.019	0.9209	Medium	5.68	5.77	4.598	71.786	0.9175	Medium	5.68
R1021C_p110g	816	838	KCADPTALSNETIGIIFKHGDDL	12.14	3	20	12.38	12.45	1.789	9.775	0.8256	Medium	12.38	12.45	1.741	9.512	0.834	Medium	12.39	12.45	1.816	9.923	0.8259	Medium	12.38	12.45	4.135	22.595	0.7554	Medium	12.39	12.45	3.583	19.579	0.7439	Medium	12.38	12.45	3.752	20.503	0.7953	Medium	12.39	12.45	6.915	37.785	0.693	Medium	12.38
R1021C_p110g	816	842	KCADPTALSNETIGIIFKHGDDLRQDM	11.89	5	24	11.9	11.98	3.672	16.72	0.8667	High	11.9	11.98	4.028	18.34	0.8972	High	11.91	11.98	3.725	16.962	0.863	High	11.91	11.98	6.679	30.412	0.8676	High	11.91	11.98	6.455	29.395	0.8702	High	11.96	12.05	6.337	28.855	0.8739	High	11.91	11.98	8.353	38.037	0.8866	High	11.91
R1021C_p110g	816	843	KCADPTALSNETIGIIFKHGDDLRQDML	12.47	4	25	12.6	12.68	3.391	14.823	0.7941	Medium	12.6	12.67	3.325	14.538	0.7891	Medium	12.61	12.67	3.43	14.996	0.7923	Medium	12.57	12.64	6.396	27.959	0.7297	Medium	12.57	12.64	6.144	26.858	0.7291	Medium	12.6	12.67	6.143	26.856	0.7543	Medium	12.6	12.67	8.081	35.326	0.6938	Medium	12.6
R1021C_p110g	824	829	SNETIG	5.53	1	4	5.53	5.76	1.237	33.805	0.8451	Medium	5.52	5.76	1.173	32.049	0.8449	Medium	5.52	5.76	1.212	33.11	0.855	Medium	5.52	5.75	1.781	48.67	0.8485	Medium	5.52	5.76	1.828	49.934	0.8419	Medium	5.53	5.76	1.786	48.806	0.8402	Medium	5.52	5.76	2	54.652	0.8426	Medium	5.6
R1021C_p110g	824	842	SNETIGIIFKHGDDLRQDM	10.75	4	17	10.78	10.86	0.88	5.66	0.8848	High	10.77	10.86	0.984	6.324	0.885	High	10.78	10.86	0.968	6.226	0.8741	High	10.77	10.86	2.745	17.647	0.9205	High	10.7	10.78	3.043	19.563	0.8624	Medium	10.77	10.86	2.739	17.607	0.9082	High	10.77	10.86	3.901	25.077	0.9188	High	10.77
R1021C_p110g	830	842	IIFKHGDDLRQDM	8.69	3	11	8.64	8.71	0.427	4.245	0.8493	Medium	8.64	8.71	0.488	4.849	0.8347	Medium	8.64	8.71	0.548	5.442	0.8635	Medium	8.64	8.71	1.391	13.816	0.8603	Medium	8.64	8.71	1.428	14.185	0.8508	Medium	8.65	8.71	1.429	14.199	0.8619	Medium	8.64	8.71	2.272	22.575	0.8481	Medium	8.64
R1021C_p110g	844	848	ILQIL	12.17	1	3	12.24	12.31	0.009	0.31	0.9089	Medium	12.24	12.31	0.005	0.189	0.8906	Medium	12.24	12.31	0.017	0.606	0.8971	Medium	12.24	12.31	0.01	0.351	0.9271	Medium	12.24	12.31	0.029	1.064	0.9164	Medium	12.24	12.31	0.014	0.513	0.9051	Medium	12.24	12.31	0.055	1.989	0.9064	Medium	12.24
R1021C_p110g	849	855	RIMESIW	11.65	2	5	11.7	11.77	0.045	0.983	0.9437	High	11.69	11.77	0.039	0.856	0.9481	High	11.7	11.78	0.067	1.46	0.9131	High	11.7	11.77	0.092	2.019	0.909	High	11.7	11.77	0.101	2.218	0.9332	High	11.7	11.77	0.163	3.565	0.9297	High	11.7	11.77	0.388	8.479	0.8781	High	11.7
R1021C_p110g	849	860	RIMESIWETESL	12.23	2	10	12.32	12.38	0.368	4.026	0.7529	Medium	12.32	12.38	0.558	6.101	0.8057	Medium	12.32	12.39	0.283	3.093	0.7324	Medium	12.32	12.38	0.595	6.506	0.7228	Medium	12.32	12.39	0.619	6.763	0.7171	Medium	12.32	12.38	0.634	6.927	0.71	Medium	12.32	12.39	2.413	26.373	0.7385	Medium	12.32
R1021C_p110g	853	861	SIWETESLD	11.4	1	7	11.53	11.6	0.641	10.012	0.7616	Medium	11.58	11.65	0.653	10.202	0.7504	Medium	11.54	11.61	0.675	10.537	0.7554	Medium	11.54	11.6	1.743	27.209	0.8005	Medium	11.54	11.61	1.726	26.954	0.8032	Medium	11.59	11.66	1.85	28.878	0.7479	Medium	11.54	11.6	2.617	40.852	0.7767	Medium	11.54
R1021C_p110g	853	862	SIWETESLDL	13.27	1	8	13.38	13.45	0.673	9.199	0.8452	Medium	13.38	13.45	0.556	7.591	0.8251	Medium	13.38	13.44	0.574	7.847	0.8452	Medium	13.37	13.44	1.594	21.771	0.896	Medium	13.38	13.44	1.645	22.469	0.8911	Medium	13.37	13.44	1.567	21.402	0.8387	Medium	13.38	13.44	2.367	32.335	0.891	Medium	13.37
R1021C_p110g	862	869	LCLLPYGC	13.44	1	5	13.44	13.51	0.322	7.04	0.7684	Medium	13.44	13.51	0.395	8.628	0.6565	Medium	13.44	13.5	0.374	8.172	0.6929	Medium	13.43	13.5	0.682	14.901	0.5934	Medium	13.43	13.5	0.685	14.973	0.5916	Medium	13.43	13.5	0.689	15.067	0.5852	Medium	13.43	13.5	1.325	28.961	0.5978	Medium	13.43
R1021C_p110g	862	878	LCLLPYGCISTGDKIGM	13.06	2	14	13.07	13.15	1.101	8.594	0.9187	High	13.06	13.14	1.074	8.383	0.9185	Medium	13.1	13.17	1.181	9.221	0.9109	High	13.06	13.14	1.68	13.114	0.8737	Medium	13.07	13.14	1.722	13.443	0.8826	Medium	13.09	13.17	1.835	14.327	0.8365	Medium	13.06	13.14	2.746	21.436	0.9034	High	13.06
R1021C_p110g	863	880	CLLPYGCISTGDKIGMIE	12.38	2	15	12.42	12.49	0.477	3.477	0.8277	Medium	12.43	12.49	0.413	3.011	0.8026	Medium	12.43	12.5	0.447	3.258	0.8045	Medium	12.43	12.49	0.896	6.529	0.81	Medium	12.43	12.49	0.916	6.674	0.8059	Medium	12.42	12.49	0.909	6.62	0.7919	Medium	12.43	12.49	2.558	18.638	0.7783	Medium	12.39
R1021C_p110g	870	878	ISTGDKIGM	7.68	2	7	7.62	7.69	0.855	13.344	0.8624	Medium	7.62	7.7	0.84	13.122	0.8509	Medium	7.62	7.7	0.905	14.125	0.8285	Medium	7.62	7.69	1.176	18.367	0.8227	Medium	7.62	7.7	1.116	17.429	0.8089	Medium	7.62	7.69	1.117	17.432	0.794	Medium	7.62	7.69	1.401	21.868	0.7943	Medium	7.62
R1021C_p110g	879	887	IEIVKDATT	7.08	1	7	7.29	7.36	1.744	27.235	0.8334	Medium	7.29	7.35	1.667	26.028	0.8461	Medium	7.29	7.35	1.675	26.154	0.8596	Medium	7.28	7.35	2.644	41.28	0.8325	Medium	7.28	7.35	2.658	41.494	0.8613	Medium	7.28	7.36	2.698	42.125	0.8394	Medium	7.28	7.35	3.429	53.53	0.8012	Medium	7.28
R1021C_p110g	879	901	IEIVKDATTIAKIQQSTVGNTGA	10.02	2	21	9.92	10	7.208	37.512	0.7676	Medium	9.92	10	7.045	36.664	0.77	Medium	10	10.06	6.989	36.373	0.6965	Medium	9.92	10	8.957	46.613	0.7422	Medium	9.92	10	8.836	45.983	0.75	Medium	9.92	10	8.942	46.538	0.7209	Medium	9.92	10	10.867	56.557	0.7888	Medium	9.92
R1021C_p110g	880	888	EIVKDATTI	7.15	2	7	7.19	7.26	1.864	29.103	0.8449	Medium	7.19	7.25	1.824	28.477	0.8593	Medium	7.19	7.25	1.877	29.307	0.8367	Medium	7.18	7.25	2.784	43.46	0.8356	Medium	7.18	7.25	2.757	43.039	0.8402	Medium	7.18	7.26	2.801	43.731	0.8398	Medium	7.18	7.25	3.527	55.068	0.8555	Medium	7.18
R1021C_p110g	888	901	IAKIQQSTVGNTGA	6.15	2	12	6.08	6.2	6.215	56.606	0.9058	High	6.09	6.21	6.132	55.843	0.9033	High	6.09	6.2	6.346	57.798	0.9335	High	6.08	6.2	6.777	61.725	0.9294	High	6.08	6.2	6.741	61.392	0.9187	High	6.09	6.21	6.865	62.519	0.9242	High	6.08	6.2	7.344	66.882	0.9112	High	6.08
R1021C_p110g	888	902	IAKIQQSTVGNTGAF	8.64	2	13	8.57	8.64	6.56	55.15	0.8771	Medium	8.58	8.64	6.456	54.278	0.8231	Medium	8.58	8.64	6.59	55.398	0.7956	Medium	8.57	8.64	7.242	60.882	0.8525	Medium	8.58	8.64	7.155	60.155	0.822	Medium	8.58	8.67	6.968	58.577	0.8338	Medium	8.58	8.64	7.495	63.009	0.8339	Medium	8.58
R1021C_p110g	888	907	IAKIQQSTVGNTGAFKDEVL	9.51	3	18	9.55	9.62	6.832	41.484	0.881	Medium	9.55	9.62	6.792	41.24	0.8704	Medium	9.55	9.63	6.762	41.057	0.8769	Medium	9.55	9.62	7.931	48.153	0.8786	Medium	9.55	9.62	7.838	47.589	0.8711	Medium	9.55	9.62	7.94	48.208	0.8618	Medium	9.59	9.66	8.501	51.617	0.8709	Medium	9.55
R1021C_p110g	888	910	IAKIQQSTVGNTGAFKDEVLNHW	10.57	3	21	10.51	10.61	6.796	35.368	0.8856	High	10.5	10.6	6.918	36.004	0.8687	Medium	10.51	10.61	6.99	36.376	0.8186	Medium	10.5	10.6	8.222	42.788	0.8567	Medium	10.51	10.61	7.935	41.295	0.8546	Medium	10.5	10.6	8.046	41.872	0.8129	Medium	10.51	10.61	8.747	45.521	0.8655	Medium	10.51
R1021C_p110g	902	910	FKDEVLNHW	10.04	3	7	10.03	10.11	0.727	11.352	0.9239	High	10.03	10.11	0.634	9.905	0.895	High	10.04	10.11	0.748	11.676	0.8759	High	10.03	10.11	1.034	16.137	0.9119	High	10.04	10.11	1.08	16.856	0.8838	High	10.03	10.11	1.067	16.652	0.881	High	10.04	10.11	1.411	22.029	0.9188	High	10.04
R1021C_p110g	902	924	FKDEVLNHWLKEKSPTEEKFQAA	9.58	3	20	9.43	9.5	1.757	9.603	0.6856	Medium	9.42	9.5	1.696	9.267	0.6869	Medium	9.43	9.5	1.578	8.622	0.6298	Medium	9.42	9.5	4.858	26.549	0.7448	Medium	9.44	9.51	4.909	26.823	0.7671	Medium	9.44	9.5	5.181	28.314	0.6708	Medium	9.42	9.5	5.954	32.536	0.752	Medium	9.42
R1021C_p110g	925	934	VERFVYSCAG	9.08	2	8	9.09	9.16	0.195	2.669	0.697	Medium	9.1	9.16	0.223	3.053	0.6802	Medium	9.1	9.17	0.24	3.276	0.6611	Medium	9.09	9.16	1.106	15.115	0.7234	Medium	9.1	9.16	1.133	15.476	0.6888	Medium	9.09	9.16	1.238	16.916	0.6521	Medium	9.1	9.16	1.492	20.376	0.7079	Medium	9.15
R1021C_p110g	927	934	RFVYSCAG	8.29	2	6	8.41	8.47	0.427	7.781	0.9137	Medium	8.41	8.48	0.416	7.57	0.9159	Medium	8.41	8.48	0.467	8.512	0.9113	Medium	8.41	8.47	0.63	11.482	0.8945	Medium	8.41	8.48	0.656	11.957	0.8997	Medium	8.41	8.48	0.547	9.956	0.886	Medium	8.41	8.48	0.783	14.265	0.9158	Medium	8.45
R1021C_p110g	935	939	YCVAT	6.8	1	3	7	7.07	0.046	1.658	0.8798	Medium	7.01	7.08	0.038	1.385	0.8717	Medium	7.01	7.08	0.081	2.938	0.8725	Medium	7	7.07	0.237	8.616	0.877	Medium	7.01	7.07	0.241	8.79	0.8848	Medium	7	7.07	0.232	8.466	0.8689	Medium	6.9	6.96	0.35	12.754	0.8861	Medium	7.01
R1021C_p110g	940	953	FVLGIGDRHNDNIM	10.54	2	12	10.58	10.71	0.686	6.252	0.8998	High	10.57	10.71	0.701	6.385	0.9086	High	10.58	10.71	0.652	5.937	0.8889	High	10.57	10.71	0.944	8.597	0.8515	High	10.57	10.71	1.043	9.495	0.8288	Medium	10.57	10.71	0.892	8.122	0.8357	Medium	10.57	10.71	1.571	14.308	0.8804	High	10.57
R1021C_p110g	954	960	ITETGNL	7.56	1	5	7.67	7.73	0.772	16.866	0.9161	High	7.66	7.73	0.789	17.24	0.9119	Medium	7.66	7.73	0.842	18.412	0.8015	Medium	7.66	7.73	1.181	25.818	0.8393	Medium	7.66	7.73	1.223	26.722	0.8427	Medium	7.66	7.73	1.277	27.921	0.8316	Medium	7.66	7.73	1.599	34.942	0.8817	Medium	7.66
R1021C_p110g	954	961	ITETGNLF	11.33	1	6	11.33	11.4	0.691	12.584	0.8824	Medium	11.33	11.4	0.749	13.639	0.8861	Medium	11.34	11.41	0.78	14.207	0.885	Medium	11.34	11.4	1.169	21.3	0.8522	Medium	11.34	11.4	1.14	20.771	0.861	Medium	11.33	11.4	1.153	21.003	0.8558	Medium	11.34	11.4	1.358	24.729	0.8253	Medium	11.34
R1021C_p110g	961	972	FHIDFGHILGNY	12.77	3	10	12.73	12.8	2.569	28.078	0.9131	High	12.73	12.8	2.567	28.056	0.9171	High	12.73	12.81	2.599	28.406	0.9049	High	12.73	12.8	3.4	37.154	0.9281	High	12.73	12.81	3.289	35.949	0.9307	High	12.73	12.8	3.319	36.271	0.9211	High	12.73	12.8	3.739	40.862	0.9487	High	12.73
R1021C_p110g	961	975	FHIDFGHILGNYKSF	12.39	4	13	12.32	12.75	4.184	35.17	0.8251	Medium	12.32	12.75	4.108	34.537	0.8186	Medium	12.32	12.76	4.244	35.675	0.8214	Medium	12.32	12.75	4.927	41.417	0.8492	Medium	12.32	12.75	4.788	40.256	0.859	Medium	12.32	12.75	4.847	40.747	0.8525	Medium	12.32	12.75	5.319	44.72	0.8815	Medium	12.32
R1021C_p110g	962	975	HIDFGHILGNYKSF	11.38	3	12	11.32	11.38	4.303	39.19	0.8699	Medium	11.32	11.38	4.283	39.007	0.8501	Medium	11.32	11.39	4.253	38.734	0.8083	Medium	11.32	11.39	5.339	48.623	0.8263	Medium	11.32	11.39	5.263	47.933	0.8257	Medium	11.32	11.38	5.271	48.009	0.7576	Medium	11.32	11.39	5.711	52.015	0.8642	Medium	11.32
R1021C_p110g	973	979	KSFLGIN	10.18	2	5	10.27	10.34	0.27	5.892	0.886	Medium	10.24	10.31	0.359	7.853	0.6135	Medium	10.27	10.34	0.267	5.835	0.6466	Medium	10.27	10.34	0.304	6.64	0.7852	Medium	10.27	10.34	0.311	6.789	0.8708	Medium	10.27	10.34	0.355	7.751	0.8798	Medium	10.27	10.34	0.928	20.277	0.5841	Medium	10.27
R1021C_p110g	993	1014	FVMGTSGKKTSPHFQKFQDICV	9.5	3	19	9.64	9.71	1.43	8.228	0.9034	High	9.64	9.72	1.536	8.836	0.8978	High	9.64	9.72	1.439	8.279	0.9045	High	9.64	9.72	2.064	11.872	0.9063	High	9.64	9.72	1.983	11.408	0.9084	High	9.64	9.71	2.058	11.837	0.8976	High	9.64	9.72	2.799	16.102	0.8986	High	9.64
R1021C_p110g	993	1014	FVMGTSGKKTSPHFQKFQDICV	9.5	4	19	9.51	9.61	1.534	8.821	0.8805	Medium	9.52	9.62	1.38	7.94	0.8661	High	9.52	9.62	1.483	8.533	0.8732	Medium	9.51	9.61	2.139	12.301	0.89	High	9.52	9.62	2.072	11.919	0.8868	High	9.51	9.61	2.041	11.741	0.8799	High	9.52	9.62	2.839	16.33	0.8958	Medium	9.52
R1021C_p110g	1035	1042	LMTGMPQL	11.7	1	5	11.83	11.9	1.87	40.865	0.895	High	11.83	11.9	1.801	39.375	0.8915	High	11.83	11.9	1.852	40.472	0.9041	High	11.8	11.87	2.982	65.17	0.8936	High	11.83	11.9	2.903	63.45	0.8835	Medium	11.83	11.9	2.915	63.72	0.8875	Medium	11.83	11.9	3.333	72.859	0.8821	High	11.83
R1021C_p110g	1035	1050	LMTGMPQLTSKEDIEY	10.94	2	13	10.89	10.96	4.237	35.616	0.911	High	10.88	10.96	4.092	34.405	0.8922	High	10.89	10.96	4.151	34.898	0.9059	High	10.88	10.96	6.5	54.642	0.9038	High	10.88	10.96	6.26	52.626	0.9009	High	10.88	10.96	6.317	53.11	0.9038	High	10.88	10.96	7.398	62.193	0.909	High	10.88
R1021C_p110g	1036	1049	MTGMPQLTSKEDIE	9.51	2	11	9.45	9.52	4.255	42.274	0.7495	Medium	9.46	9.52	3.982	39.566	0.7468	Medium	9.46	9.53	4.09	40.633	0.7261	Medium	9.45	9.52	5.721	56.837	0.7516	Medium	9.46	9.52	5.692	56.549	0.7474	Medium	9.5	9.56	5.688	56.515	0.7309	Medium	9.5	9.57	6.396	63.549	0.7319	Medium	9.46
R1021C_p110g	1050	1071	YIRDALTVGKNEEDAKKYFLDQ	9.72	4	20	9.71	9.78	5.292	28.918	0.8891	High	9.72	9.78	5.108	27.913	0.8573	Medium	9.72	9.79	5.607	30.64	0.8724	High	9.72	9.78	7.603	41.549	0.8965	High	9.72	9.78	7.554	41.281	0.8967	High	9.71	9.78	7.705	42.103	0.8754	Medium	9.74	9.81	9.782	53.455	0.8884	Medium	9.72
R1021C_p110g	1051	1071	IRDALTVGKNEEDAKKYFLDQ	9.5	4	19	9.45	9.52	4.541	26.123	0.831	Medium	9.45	9.52	4.403	25.325	0.8277	Medium	9.45	9.53	4.311	24.796	0.8157	Medium	9.45	9.52	6.405	36.84	0.8402	Medium	9.45	9.52	6.265	36.036	0.8423	Medium	9.45	9.52	6.456	37.136	0.8065	Medium	9.45	9.52	8.491	48.843	0.8261	Medium	9.45
R1021C_p110g	1072	1084	IEVCRDKGWTVQF	11.18	2	11	11.22	11.29	1.999	19.864	0.882	Medium	11.23	11.29	1.996	19.832	0.8549	Medium	11.23	11.3	1.931	19.186	0.8111	Medium	11.23	11.29	3.924	38.988	0.8733	Medium	11.23	11.3	3.935	39.097	0.8681	Medium	11.22	11.29	3.822	37.977	0.8482	Medium	11.23	11.29	5.294	52.597	0.8863	Medium	11.23
R1021C_p110g	1074	1084	VCRDKGWTVQF	10.65	3	9	10.72	10.8	1.427	17.326	0.894	Medium	10.71	10.79	1.386	16.832	0.8806	Medium	10.72	10.79	1.416	17.199	0.8841	Medium	10.71	10.79	3.452	41.919	0.8952	Medium	10.72	10.79	3.284	39.874	0.8989	Medium	10.72	10.8	3.356	40.758	0.9158	Medium	10.72	10.79	4.519	54.871	0.9074	Medium	10.72
R1021C_p110g	1088	1092	LHLVL	11.09	2	3	10.97	11.05	0.587	21.374	0.9357	High	10.97	11.05	0.595	21.668	0.9345	High	10.98	11.05	0.615	22.416	0.9328	High	11	11.07	1.455	52.989	0.9048	High	10.98	11.05	1.442	52.549	0.8721	High	10.97	11.05	1.482	54.001	0.889	Medium	10.98	11.05	1.758	64.059	0.9375	High	10.98
							3s						3s						3s						30s						30s						30s						300s						300s
State	Start	End	Sequence	Search RT	Charge	Max D	Start RT	End RT	#D	%D	Score	Conf	Start RT	End RT	#D	%D	Score	Conf	Start RT	End RT	#D	%D	Score	Conf	Start RT	End RT	#D	%D	Score	Conf	Start RT	End RT	#D	%D	Score	Conf	Start RT	End RT	#D	%D	Score	Conf	Start RT	End RT	#D	%D	Score	Conf	Start RT
p110g	954	992	ITETGNLFHIDFGHILGNYKSFLGINKERVPFVLTPDFL	13.93	5	35	13.99	14.05	11.319	32.34	0.8069	Medium	13.99	14.05	11.015	31.471	0.8359	Medium	13.99	14.05	11.358	32.45	0.8609	Medium	13.99	14.05	12.754	36.441	0.8185	Medium	13.99	14.06	12.385	35.385	0.814	Medium	13.99	14.05	12.558	35.879	0.8388	Medium	13.99	14.05	13.717	39.191	0.8213	Medium	13.99
p110g	961	992	FHIDFGHILGNYKSFLGINKERVPFVLTPDFL	13.78	6	28	13.71	14.1	11.2	40	0.8036	Medium	13.71	14.1	10.742	38.363	0.781	Medium	13.71	14.1	10.981	39.217	0.8172	Medium	13.71	14.1	12.218	43.634	0.7865	Medium	13.71	14.1	11.942	42.65	0.794	Medium	13.71	14.1	12.084	43.157	0.7989	Medium	13.71	14.1	13.097	46.775	0.8049	Medium	13.71
p110g	973	992	KSFLGINKERVPFVLTPDFL	12.8	4	16	12.59	13.18	4.587	28.669	0.9452	High	12.59	13.18	4.588	28.677	0.9348	High	12.59	13.18	4.583	28.644	0.9341	High	12.59	13.18	5.154	32.215	0.9437	High	12.59	13.18	5.033	31.459	0.9432	High	12.59	13.18	5.104	31.898	0.9363	High	12.59	13.18	5.747	35.918	0.9435	High	12.59
p110g	976	992	LGINKERVPFVLTPDFL	13.06	3	13	13.27	13.34	2.673	20.562	0.9217	High	13.27	13.34	2.64	20.307	0.9194	High	13.26	13.34	2.653	20.405	0.919	High	13.27	13.34	3.254	25.034	0.9183	High	13.27	13.34	3.121	24.009	0.9148	High	13.26	13.34	3.238	24.906	0.9073	High	13.27	13.34	3.827	29.441	0.9196	High	13.26
p110g	980	992	KERVPFVLTPDFL	12.66	3	9	12.8	12.86	0.514	5.712	0.9282	Medium	12.8	12.86	0.543	6.029	0.9344	Medium	12.8	12.86	0.55	6.106	0.9448	Medium	12.8	12.86	0.991	11.01	0.9527	Medium	12.8	12.86	0.956	10.617	0.9377	Medium	12.8	12.86	1.052	11.687	0.9427	Medium	12.8	12.86	1.561	17.348	0.9232	Medium	12.8
p110g	1015	1027	KAYLALRHHTNLL	7.62	2	11	7.63	7.7	0.241	2.187	0.8615	Medium	7.63	7.7	0.17	1.542	0.8599	Medium	7.63	7.7	0.206	1.874	0.8558	Medium	7.63	7.7	0.336	3.052	0.8417	Medium	7.63	7.7	0.273	2.478	0.8631	Medium	7.63	7.7	0.284	2.582	0.8515	Medium	7.63	7.7	0.82	7.451	0.8498	Medium	7.63
p110g	1017	1026	YLALRHHTNL	6.64	3	8	6.82	6.9	0.272	3.398	0.9452	High	6.82	6.9	0.271	3.391	0.9432	High	6.82	6.9	0.303	3.791	0.9504	High	6.82	6.9	0.318	3.978	0.9076	Medium	6.82	6.9	0.393	4.917	0.9332	High	6.82	6.9	0.371	4.634	0.9414	High	6.82	6.9	0.813	10.158	0.9323	Medium	6.82
p110g	1019	1026	ALRHHTNL	4.09	3	6	4.11	4.18	0.512	8.541	0.9266	Medium	4.11	4.18	0.518	8.639	0.9163	Medium	4.14	4.22	0.429	7.148	0.9055	Medium	4.11	4.18	0.549	9.147	0.9276	Medium	4.11	4.18	0.562	9.366	0.9183	Medium	4.11	4.18	0.44	7.334	0.862	Medium	4.11	4.17	1.001	16.678	0.9049	Medium	4.11
R1021C	954	992	ITETGNLFHIDFGHILGNYKSFLGINKERVPFVLTPDFL	13.93	5	35	13.99	14.06	10.941	31.259	0.7776	Medium	13.99	14.06	10.654	30.441	0.7904	Medium	13.99	14.06	10.498	29.994	0.7959	Medium	13.99	14.05	13.721	39.202	0.7757	Medium	13.99	14.05	13.528	38.652	0.764	Medium	13.99	14.05	13.519	38.625	0.7812	Medium	13.99	14.05	16.534	47.241	0.7894	Medium	13.99
R1021C	961	992	FHIDFGHILGNYKSFLGINKERVPFVLTPDFL	13.78	6	28	13.72	14.1	10.14	36.215	0.8023	Medium	13.71	14.1	10.461	37.359	0.7817	Medium	13.71	14.1	10.422	37.222	0.7431	Medium	13.71	14.1	12.882	46.007	0.7561	Medium	13.71	14.1	13.087	46.739	0.786	Medium	13.71	14.09	12.634	45.121	0.7591	Medium	13.71	14.1	15.301	54.647	0.7702	Medium	13.71
R1021C	973	992	KSFLGINKERVPFVLTPDFL	12.8	4	16	12.58	13.19	4.684	29.274	0.8806	Medium	12.58	13.18	4.658	29.111	0.8937	Medium	12.59	13.18	4.627	28.919	0.8838	Medium	12.59	13.18	6.927	43.296	0.9067	High	12.59	13.18	7.235	45.216	0.8778	High	12.58	13.18	7.167	44.796	0.883	High	12.59	13.18	8.449	52.808	0.9201	High	12.59
R1021C	976	992	LGINKERVPFVLTPDFL	13.06	3	13	13.27	13.35	3.033	23.332	0.8653	High	13.26	13.34	3.011	23.159	0.8747	Medium	13.27	13.34	3.013	23.18	0.8585	High	13.26	13.34	4.997	38.441	0.8736	Medium	13.27	13.34	4.923	37.866	0.8844	Medium	13.26	13.34	4.938	37.983	0.9158	High	13.27	13.34	6.434	49.492	0.9293	High	13.27
R1021C	980	992	KERVPFVLTPDFL	12.66	3	9	12.79	12.86	1.26	13.997	0.8905	Medium	12.79	12.86	1.369	15.208	0.921	Medium	12.8	12.87	1.16	12.894	0.9084	Medium	12.79	12.86	2.914	32.381	0.8658	Medium	12.85	12.91	2.748	30.529	0.9001	Medium	12.79	12.86	2.744	30.489	0.8625	Medium	12.8	12.86	4.176	46.401	0.8536	Medium	12.8
R1021C	1017	1026	YLALCHHTNL	6.64	3	8	6.45	6.82	3.255	40.683	0.9484	Medium	6.46	6.83	3.242	40.53	0.9439	Medium	6.45	6.82	3.297	41.213	0.9184	Medium	6.45	6.82	3.345	41.807	0.9478	Medium	6.45	6.82	3.305	41.316	0.9364	Medium	6.45	6.82	3.356	41.948	0.9293	Medium	6.45	6.82	3.82	47.753	0.9008	Medium	6.45
[truncated: 29 more columns]
