# Supplementary material for: Disease-related mutations in PI3Kγ disrupt regulatory C-terminal dynamics and reveal a path to selective inhibitors
Source: eLife. 2021 Mar 4;10:e64691. doi: 10.7554/eLife.64691 (PMC7955810; doi:10.7554/eLife.64691)
Supplement: Figure 2—source data 1. [file elife-64691-fig2-data1.xlsx]

## Sheet: Figure 2_p110g p101_mutant_HDX
						Average % deuterium incorporation																														% deuterium changes
p110g						APO									R1021C									R1021P												APO vs R1021C									APO vs R1021P
S	E	Max D	RT	Z	Sequence	3s	SD	30s	SD	300s	SD	3000s	SD		3s	SD	30s	SD	300s	SD	3000s	SD		3s	SD	30s	SD	300s	SD	3000s	SD					3s	SD	30s	SD	300s	SD	3000s	SD		3s	SD	30s	SD	300s
4	12	6	9.265	2	ENYKQPVVL	83.5223	0.39706	84.0287	0.33568	84.7313	0.516744	85.0947	0.538849		83.4347	0.570702	83.7557	0.303523	83.835	0.69697	84.8653	0.269678		81.713	1.12691	82.9963	0.266506	84.894	0.804321	86.9257	0.656909		Average % Deuterium incorporation	100		0.0876667	0.967761	0.273	0.639204	0.896333	1.21371	0.229333	0.808527		1.80933	1.52397	1.03233	0.602186	-0.162667
13	32	17	4.24	5	REDNCRRRRRMKPRSAAASL	39.646	0.452337	41.204	1.1735	40.1423	0.501911	42.4477	0.849215		40.3497	0.308293	40.111	0.802626	41.3027	0.282378	40.712	0.311963		40.005	0.702092	41.6803	0.383094	41.4073	0.901506	43.2167	0.555731			90		-0.703667	0.76063	1.093	1.97613	-1.16033	0.784289	1.73567	1.16118		-0.359	1.15443	-0.476333	1.5566	-1.265
35	41	4	12.455	2	MELIPIE	21.1623	0.977935	24.6963	0.568498	30.157	0.300651	37.755	0.189388		17.616	1.09526	25.5247	0.695464	30.182	0.890714	38.5723	0.404145		19.854	1.0737	26.2067	0.391027	31.6067	0.908947	38.2807	0.597567			80		3.54633	2.0732	-0.828333	1.26396	-0.025	1.19136	-0.817333	0.593534		1.30833	2.05163	-1.51033	0.959526	-1.44967
36	41	3	10.92	1	ELIPIE	1.35867	0.163127	1.47967	0.435735	8.359	0.951867	20.4097	0.654503		1.414	0.318704	2.46367	0.500409	9.85033	0.856012	20.6707	0.783559		0.844667	0.409612	1.718	0.445027	8.845	0.970462	19.2833	1.0213			70		-0.0553333	0.48183	-0.984	0.936145	-1.49133	1.80788	-0.261	1.43806		0.514	0.572739	-0.238333	0.880762	-0.486
38	58	17	10.625	4	IPIEFVLPTSQRKCKSPETAL	20.1427	0.528218	26.479	1.12896	30.8803	0.686139	35.0443	0.653893		20.1713	0.468748	26.8167	0.852813	29.3163	1.01455	35.3847	0.467343		21.4577	0.131001	26.4373	0.606584	31.9307	0.645099	35.7913	0.26768			60		-0.0286667	0.996966	-0.337667	1.98178	1.564	1.70069	-0.340333	1.12124		-1.315	0.659219	0.0416667	1.73555	-1.05033
42	58	13	8.555	2	FVLPTSQRKCKSPETAL	30.887	0.43822	40.201	0.69723	46.2893	0.910397	52.4297	0.260416		30.2323	0.311346	41.603	0.600452	45.644	0.738054	51.843	0.630152		29.7837	1.12431	40.635	0.648477	45.402	0.792613	52.041	0.818116			50		0.654667	0.749566	-1.402	1.29768	0.645333	1.64845	0.586667	0.890568		1.10333	1.56253	-0.434	1.34571	0.887333
42	59	14	9.67	3	FVLPTSQRKCKSPETALL	24.615	0.273501	33.526	0.534461	38.2213	0.713099	43.9103	0.1205		24.669	0.177434	33.8263	0.602769	37.3203	0.539338	43.7243	0.714273		25.785	0.0555068	33.6123	0.439841	37.8903	0.939325	43.917	0.905302			40		-0.054	0.450936	-0.300333	1.13723	0.901	1.25244	0.186	0.834774		-1.17	0.329008	-0.0863333	0.974303	0.331
59	70	10	6.825	3	LHVAGHGNVEQM	4.63567	0.0571431	11.3097	0.237464	15.4483	0.508412	26.7137	0.237769		4.292	0.260379	11.8887	0.287863	16.0363	0.0195021	27.6937	0.731503		4.55767	0.642943	11.9817	0.165742	16.165	0.590269	29.0107	0.672372			30		0.343667	0.317522	-0.579	0.525328	-0.588	0.527914	-0.98	0.969273		0.078	0.700087	-0.672	0.403206	-0.716667
59	72	12	6.155	2	LHVAGHGNVEQMKA	3.07233	0.505334	8.27267	0.447529	11.3787	0.395204	24.8727	0.371054		3.05533	0.379569	8.57	0.38158	11.8	0.570217	25.723	0.554858		3.48767	0.787437	9.34533	0.335026	12.336	0.145286	27.1273	0.652516			20		0.017	0.884902	-0.297333	0.829109	-0.421333	0.965421	-0.850333	0.925912		-0.415333	1.29277	-1.07267	0.782555	-0.957333
60	75	14	8.455	3	HVAGHGNVEQMKAQVW	1.60667	0.0936287	4.06533	0.191106	6.33367	0.0882968	16.4673	0.247593		1.69133	0.0586032	4.02533	0.143514	6.41567	0.251246	17.0933	0.304246		2.017	0.173761	4.39033	0.196882	6.51167	0.16007	18.1547	0.126085			10		-0.0846667	0.152232	0.04	0.33462	-0.082	0.339542	-0.626	0.551839		-0.410333	0.26739	-0.325	0.387987	-0.178
79	84	4	6.525	1	LETSVA	56.2013	1.17788	78.5617	0.698159	85.827	0.996353	86.1857	0.358904		53.938	0.881512	79.2417	1.09555	84.7767	0.664496	86.601	0.630786		54.5223	0.917344	78.503	0.580431	83.771	0.665358	85.1093	0.444578					2.26333	2.05939	-0.68	1.79371	1.05033	1.66085	-0.415333	0.98969		1.679	2.09522	0.0586667	1.27859	2.056
79	86	6	6.42	1	LETSVAAD	56.7013	0.606307	73.1577	0.33042	78.5567	0.854038	78.418	0.812452		54.8617	0.0562168	73.5473	0.757804	77.622	0.344749	78.8557	0.16433		54.9693	1.23518	73.8837	0.594999	77.955	0.285349	79.5367	0.397943					1.83967	0.662524	-0.389667	1.08822	0.934667	1.19879	-0.437667	0.976782		1.732	1.84148	-0.726	0.925419	0.601667
85	99	12	11.48	4	ADFYHRLGPHHFLLL	4.38433	0.287577	11.5973	0.333529	15.1143	0.822153	18.3957	0.1145		4.37433	0.283363	12.2447	0.165944	14.7543	0.269149	18.747	0.425323		4.05267	0.377985	11.643	0.122111	14.5393	0.509786	18.949	0.516123					0.01	0.570939	-0.647333	0.499472	0.36	1.0913	-0.351333	0.539824		0.331667	0.665561	-0.0456667	0.455639	0.575
87	99	10	10.54	2	FYHRLGPHHFLLL	3.23267	0.0805067	5.97733	0.457525	7.256	0.0977701	10.7413	0.252809		2.94133	0.147093	6.16167	0.220187	7.10633	0.237127	10.7367	0.253366		3.09033	0.367214	6.582	0.483521	7.44267	0.227496	11.614	0.619547					0.291333	0.2276	-0.184333	0.677712	0.149667	0.334897	0.00466667	0.506175		0.142333	0.447721	-0.604667	0.941047	-0.186667
88	98	8	8.63	3	YHRLGPHHFLL	5.66067	0.456995	10.3533	0.8848	12.1103	1.05206	15.3283	0.509298		4.825	0.258455	10.3173	0.466438	12.101	0.560577	16.3027	0.575981		5.51867	0.712641	10.6293	1.04328	12.2747	0.561338	17.6243	0.336075					0.835667	0.71545	0.036	1.35124	0.00933333	1.61263	-0.974333	1.08528		0.142	1.16964	-0.276	1.92808	-0.164333
100	106	5	6.295	2	YQKKGQW	34.597	0.240807	55.9047	0.902063	58.612	1.16133	62.176	0.462352		33.5757	0.25644	56.4427	0.281314	58.1943	0.7624	63.7733	0.849654		32.267	0.438599	57.0603	0.769822	58.2207	0.797221	62.3287	0.540992					1.02133	0.497247	-0.538	1.18338	0.417667	1.92373	-1.59733	1.31201		2.33	0.679406	-1.15567	1.67188	0.391333
107	118	10	9.57	2	YEIYDKYQVVQT	9.815	0.120449	19.5173	0.516466	30.6803	0.501007	45.314	0.245725		10.0157	0.343468	21.3027	0.307201	31.4493	0.190224	50.46	0.504441		11.1873	0.785666	22.5353	1.01377	31.989	0.194144	53.1587	0.574151					-0.200667	0.463917	-1.78533	0.823667	-0.769	0.691232	-5.146	0.750167		-1.37233	0.906115	-3.018	1.53023	-1.30867
114	121	6	9.06	1	QVVQTLDC	16.8533	0.316175	23.0057	0.795859	24.783	1.14142	32.426	0.452297		16.6747	0.343002	23.5153	0.723952	24.7757	0.546875	35.052	0.452845		17.9877	0.157513	24.1117	0.592853	25.713	1.05919	35.6253	0.262176					0.178667	0.659176	-0.509667	1.51981	0.00733333	1.6883	-2.626	0.905143		-1.13433	0.473687	-1.106	1.38871	-0.93
122	137	13	7.75	4	LRYWKATHRSPGQIHL	3.26	0.344517	10.376	0.504257	16.819	0.438645	23.2217	0.451387		3.06367	0.107002	10.8367	0.270239	16.5643	0.330851	23.2837	0.906312		3.127	0.254576	10.6997	0.1461	16.4323	0.69293	23.4307	0.897502					0.196333	0.451519	-0.460667	0.774496	0.254667	0.769495	-0.062	1.3577		0.133	0.599093	-0.323667	0.650357	0.386667
122	149	23	6.64	5	LRYWKATHRSPGQIHLVQRHPPSEESQA	9.18733	0.232035	17.9143	0.847096	23.979	0.89185	26.8597	0.639797		8.76467	0.090633	18.799	0.51728	23.4097	0.983838	27.2713	1.34647		8.86033	0.360744	18.724	0.385244	23.0037	1.11434	27.73	0.953665					0.422667	0.322668	-0.884667	1.36438	0.569333	1.87569	-0.411667	1.98626		0.327	0.592779	-0.809667	1.23234	0.975333
122	157	31	8.765	5	LRYWKATHRSPGQIHLVQRHPPSEESQAFQRQLTAL	5.91767	0.239753	13.7093	0.515901	20.7007	0.359385	29.4163	0.339484		5.623	0.0799937	14.6347	0.170295	20.544	0.252525	29.372	0.841473		5.68167	0.265016	14.3327	0.521072	19.9043	0.611737	29.7153	0.525995					0.294667	0.319746	-0.925333	0.686196	0.156667	0.61191	0.0443333	1.18096		0.236	0.504768	-0.623333	1.03697	0.796333
125	157	28	8.77	5	WKATHRSPGQIHLVQRHPPSEESQAFQRQLTAL	6.50767	0.2225	14.9127	0.451578	21.4217	0.486545	29.7093	0.291618		5.703	0.214252	15.6847	0.491754	21.0277	0.865648	29.5073	0.57287		5.906	0.540303	15.2617	0.361807	20.5213	0.611153	29.276	0.546369					0.804667	0.436752	-0.772	0.943332	0.394	1.35219	0.202	0.864489		0.601667	0.762803	-0.349	0.813385	0.900333
138	157	16	9.95	4	VQRHPPSEESQAFQRQLTAL	10.4757	0.237748	21.0723	0.754957	30.6803	0.404045	43.514	0.514168		10.089	0.0606053	22.5437	0.218001	30.8973	0.936559	43.2193	0.32577		10.364	0.758516	21.8993	0.785469	29.2103	1.05765	42.9147	1.10977					0.386667	0.298354	-1.47133	0.972958	-0.217	1.3406	0.294667	0.839939		0.111667	0.996265	-0.827	1.54043	1.47
150	157	6	9.355	2	FQRQLTAL	1.603	0.177907	5.98133	0.118095	18.276	0.362377	35.4303	0.313715		1.98	0.644245	7.255	0.487505	17.732	0.194584	35.6767	0.480814		2.76733	0.427119	6.134	0.0374032	16.313	0.563517	34.7797	0.847311					-0.377	0.822152	-1.27367	0.605599	0.544	0.556961	-0.246333	0.79453		-1.16433	0.605026	-0.152667	0.155498	1.963
151	157	5	8.35	2	QRQLTAL	2.02933	0.213739	7.08467	0.852482	19.8157	0.188797	34.2457	0.172097		2.03533	0.501714	8.18	0.786975	20.199	0.233476	35.2067	0.563509		3.09833	0.79908	7.03267	0.461095	18.645	0.666981	35.7537	0.611986					-0.006	0.715453	-1.09533	1.63946	-0.383333	0.422273	-0.961	0.735606		-1.069	1.01282	0.052	1.31358	1.17067
158	164	5	8.47	1	IGYDVTD	12.1743	0.174314	22.7813	0.757379	45.9423	0.710734	61.5307	0.228843		12.379	0.213914	24.9883	0.568187	45.8937	0.571672	61.904	1.21518		13.819	0.341317	27.397	0.588368	46.6523	1.30499	61.4793	0.156542					-0.204667	0.388227	-2.207	1.32557	0.0486667	1.28241	-0.373333	1.44402		-1.64467	0.51563	-4.61567	1.34575	-0.71
158	173	14	10.575	2	IGYDVTDVSNVHDDEL	22.9987	0.318996	33.789	1.33498	43.6227	1.09658	48.0233	0.870653		22.9807	0.421917	35.4697	0.263912	42.9653	0.690963	48.1447	1.51869		24.205	0.429035	36.1347	0.492457	42.7153	0.996603	47.9613	1.18127					0.018	0.740913	-1.68067	1.5989	0.657333	1.78754	-0.121333	2.38935		-1.20633	0.748031	-2.34567	1.82744	0.907333
158	174	15	10.11	2	IGYDVTDVSNVHDDELE	21.7467	0.217454	31.416	0.520726	42.2977	0.803369	48.2337	0.793751		21.6323	0.334379	33.3543	0.298296	42.0883	0.408468	48.2283	1.30608		22.8223	0.499602	33.7533	0.493462	41.5153	0.782395	47.6723	0.253587					0.114333	0.551833	-1.93833	0.819022	0.209333	1.21184	0.00533333	2.09983		-1.07567	0.717056	-2.33733	1.01419	0.782333
165	175	9	10.725	2	VSNVHDDELEF	13.5977	0.419321	25.1807	0.921811	30.4617	0.246255	32.6923	0.568433		13.146	0.0780833	26.1793	0.516548	30.0373	0.421787	32.265	0.789386		15.6353	0.421177	26.8377	0.354544	30.002	0.109192	32.634	0.392488					0.451667	0.497405	-0.998667	1.43836	0.424333	0.668042	0.427333	1.35782		-2.03767	0.840499	-1.657	1.27636	0.459667
174	182	7	7.38	2	EFTRRGLVT	1.27133	0.345834	2.66267	0.305523	7.864	0.251573	13.6007	0.0469184		1.25733	0.0355715	3.127	0.428332	8.161	0.394004	13.8483	0.0611746		1.76233	0.457827	3.58567	0.205952	9.13033	0.389156	14.3053	0.172001					0.014	0.381406	-0.464333	0.733855	-0.297	0.645577	-0.247667	0.108093		-0.491	0.803661	-0.923	0.511475	-1.26633
174	195	18	8.355	5	EFTRRGLVTPRMAEVASRDPKL	6.16367	0.147555	10.9393	0.242149	20.369	0.244575	32.1893	0.456887		5.803	0.349026	11.3893	0.0758837	20.1597	0.265197	32.1473	0.608375		5.28567	0.287552	10.971	0.260617	18.3657	0.654555	30.6423	0.638207					0.360667	0.49658	-0.45	0.318033	0.209333	0.509772	0.042	1.06526		0.878	0.435107	-0.0316667	0.502766	2.00333
175	182	6	6.395	2	FTRRGLVT	1.32467	0.147314	3.119	0.298557	9.863	0.186598	17.1577	0.287542		1.04	0.523781	3.71933	0.368925	10.5893	0.333536	17.1817	0.544064		1.60367	0.431251	3.90967	0.221173	11.3403	0.930235	17.806	0.92721					0.284667	0.671095	-0.600333	0.667481	-0.726333	0.520135	-0.024	0.831606		-0.279	0.578565	-0.790667	0.519729	-1.47733
175	187	10	7.305	3	FTRRGLVTPRMAE	1.70867	0.302027	3.13333	0.217865	10.1357	0.889866	20.064	0.0727461		1.085	0.072643	2.83867	0.352012	8.56	0.0816823	19.3127	0.255837		1.29433	0.299089	2.69067	0.126243	7.95767	1.01272	18.0097	0.193304					0.623667	0.37467	0.294667	0.569877	1.57567	0.971549	0.751333	0.328583		0.414333	0.601116	0.442667	0.344109	2.178
183	195	10	7.11	3	PRMAEVASRDPKL	11.167	0.635257	18.7407	0.411432	31.665	0.123041	47.3557	0.541605		10.9547	0.567601	19.7193	0.85159	31.2817	0.36361	46.787	0.558818		10.823	0.412688	18.7247	0.285491	29.716	0.856597	45.4167	0.416442					0.212333	1.20286	-0.978667	1.26302	0.383333	0.486651	0.568667	1.10042		0.344	1.04794	0.016	0.696923	1.949
186	195	7	6.39	2	AEVASRDPKL	15.3237	0.267442	25.6133	0.496226	40.7857	0.703096	54.4323	0.33433		14.7587	0.0640417	26.3257	0.454235	39.762	0.670647	54.1407	1.10729		14.5593	0.658151	25.4977	0.684659	36.9547	0.728658	52.998	0.66022					0.565	0.331484	-0.712333	0.950461	1.02367	1.37374	0.291667	1.44162		0.764333	0.925593	0.115667	1.18088	3.831
188	195	5	5.645	2	VASRDPKL	22.0763	0.202747	33.7227	0.494935	47.051	0.569643	58.887	0.477773		20.7987	0.533436	34.3267	0.104806	46.5217	0.739531	57.909	1.19209		20.674	0.548703	34.6747	0.664511	44.8087	0.597298	56.1783	0.733006					1.27767	0.736183	-0.604	0.599741	0.529333	1.30917	0.978	1.66986		1.40233	0.75145	-0.952	1.15945	2.24233
196	211	11	12.015	3	YAMHPWVTSKPLPEYL	27.126	0.254643	37.7443	0.971784	49.3353	0.494294	56.6853	0.514504		26.6113	0.180326	38.8743	0.342993	48.243	0.311048	56.496	0.337634		28.5853	0.485473	41.8717	1.02292	51.2163	0.62043	56.502	0.523377					0.514667	0.434969	-1.13	1.31478	1.09233	0.805342	0.189333	0.852138		-1.45933	0.740116	-4.12733	1.9947	-1.881
212	221	8	10.675	1	WKKIANNCIF	23.2967	0.429	38.9477	0.713479	55.5727	0.723942	59.7193	0.577905		22.397	0.04531	41.496	0.357067	54.8073	0.392039	59.7043	0.711092		24.735	0.900524	46.2043	0.987399	55.0227	0.414769	58.639	0.58822					0.899667	0.47431	-2.54833	1.07055	0.765333	1.11598	0.015	1.289		-1.43833	1.32952	-7.25667	1.70088	0.55
222	232	9	4.87	2	IVIHRSTTSQT	32.3023	0.560422	33.2393	0.733508	35.8843	0.533976	41.7883	0.709018		32.0697	0.359051	33.0867	0.297836	36.0223	0.469946	41.371	0.733131		31.195	0.529096	34.1707	0.89358	38.149	0.582348	42.7553	0.74555					0.232667	0.919472	0.152667	1.03134	-0.138	1.00392	0.417333	1.44215		1.10733	1.08952	-0.931333	1.62709	-2.26467
222	245	20	9.31	4	IVIHRSTTSQTIKVSPDDTPGAIL	11.3557	0.100719	16.093	0.86787	20.184	0.967326	26.2663	0.765893		11.2523	0.268355	16.6293	0.679081	20.1353	0.612729	26.087	0.811898		10.9133	0.312606	16.6313	0.49746	20.4843	0.681309	26.4207	0.614651					0.103333	0.369074	-0.536333	1.54695	0.0486667	1.58005	0.179333	1.57779		0.442333	0.413325	-0.538333	1.36533	-0.300333
233	245	9	10.215	2	IKVSPDDTPGAIL	9.11	0.278408	12.5733	0.704805	20.1227	0.741503	31.4167	0.643308		9.18333	0.119976	13.239	0.225502	20.116	0.597003	31.3143	0.967569		9.208	0.323918	13.2597	0.243274	20.1577	0.936149	30.8223	0.727297					-0.0733333	0.398384	-0.665667	0.930307	0.00666667	1.33851	0.102333	1.61088		-0.098	0.602326	-0.686333	0.948079	-0.035
249	269	18	7.565	2	FTKMAKKKSLMDIPESQSEQD	51.676	0.856329	53.5827	1.04358	54.616	0.467064	55.109	0.344257		50.6303	0.286961	54.8007	0.306636	54.231	0.726975	54.8407	0.107109		50.0933	1.14883	53.9203	0.95531	54.0663	1.11679	55.5453	1.06637					1.04567	1.14329	-1.218	1.35021	0.385	1.19404	0.268333	0.451366		1.58267	2.00516	-0.337667	1.99889	0.549667
270	280	9	9.9	3	FVLRVCGRDEY	2.73667	0.669746	3.86333	0.56736	7.36733	0.159532	8.411	0.373261		2.77267	0.765315	4.21933	0.267001	7.20067	0.768608	9.211	0.600341		6.16767	0.215651	6.682	0.941408	8.88267	0.415724	12.272	0.203315					-0.036	1.43506	-0.356	0.834361	0.166667	0.92814	-0.8	0.973602		-3.431	0.885397	-2.81867	1.50877	-1.51533
270	281	10	11.325	3	FVLRVCGRDEYL	1.39333	0.0692411	2.37167	0.0653172	6.30667	0.348184	9.00267	0.243052		1.45267	0.216077	2.81433	0.132926	6.24133	0.0988956	9.20233	0.384396		5.09667	0.196716	6.323	0.23388	9.17167	0.648103	14.359	0.152699					-0.0593333	0.285318	-0.442667	0.198243	0.0653333	0.44708	-0.199667	0.627448		-3.70333	0.265958	-3.95133	0.299197	-2.865
282	291	7	8.27	2	VGETPIKNFQ	8.421	0.209351	8.13133	0.253094	9.68767	0.325027	16.753	0.299782		8.24167	0.285267	8.359	0.230226	8.95267	0.127257	17.6967	0.453725		9.27833	0.402122	8.32667	0.319589	10.481	0.344893	21.0783	0.376117					0.179333	0.494619	-0.227667	0.48332	0.735	0.452284	-0.943667	0.753507		-0.857333	0.611474	-0.195333	0.572683	-0.793333
282	307	23	11.395	4	VGETPIKNFQWVRHCLKNGEEIHVVL	4.52867	0.0983379	15.0383	0.612693	18.252	0.110109	19.4503	0.179277		4.23567	0.0632877	15.761	0.132917	17.7653	0.0957096	19.5897	0.29696		5.093	0.317123	15.6923	0.2794	18.0073	0.703918	21.539	0.536313					0.293	0.161626	-0.722667	0.74561	0.486667	0.205819	-0.139333	0.476237		-0.564333	0.415461	-0.654	0.892093	0.244667
292	307	14	8.955	4	WVRHCLKNGEEIHVVL	4.80733	0.315332	17.7077	0.67685	21.223	0.402259	22.018	0.697396		4.381	0.191789	18.4597	0.0958454	20.7887	0.678687	21.9523	0.784003		4.99133	0.410941	19.085	0.0910165	21.143	0.549408	23.6743	0.476304					0.426333	0.507121	-0.752	0.772696	0.434333	1.08095	0.0656667	1.4814		-0.184	0.726273	-1.37733	0.767867	0.08
303	315	8	10.635	2	IHVVLDTPPDPAL	9.29233	2.40044	21.1903	0.647618	28.8317	1.39307	32.0637	0.282727		8.26567	0.133155	21.936	1.3711	28.009	0.589195	32.2643	0.719736		7.99667	2.08559	20.4813	0.972692	27.9467	1.17091	31.7597	0.649371					1.02667	2.5336	-0.745667	2.01872	0.822667	1.98227	-0.200667	1.00246		1.29567	4.48603	0.709	1.62031	0.885
308	315	3	8.7	1	DTPPDPAL	17.0597	0.858392	37.8373	0.208879	51.2987	0.874989	62.4413	0.637061		16.0207	0.463681	38.49	0.561281	49.687	0.85489	61.5533	0.118576		17.4017	1.4205	39.5943	0.411393	50.5847	0.405995	61.782	1.03437					1.039	1.32207	-0.652667	0.770159	1.61167	1.72988	0.888	0.755637		-0.342	2.27889	-1.757	0.620272	0.714
316	335	17	12.69	3	DEVRKEEWPLVDDCTGVTGY	36.167	0.345313	42.7317	1.30558	47.012	0.511096	53.7887	0.594813		35.71	0.680606	44.016	0.413265	46.8683	0.151001	53.625	0.837142		37.5913	0.244259	44.4037	0.636934	46.6653	0.961787	54.8117	1.43301					0.457	1.02592	-1.28433	1.71884	0.143667	0.662097	0.163667	1.43196		-1.42433	0.589572	-1.672	1.94251	0.346667
316	339	21	12.02	4	DEVRKEEWPLVDDCTGVTGYHEQL	31.855	0.123503	39.9633	0.392153	45.458	0.842301	52.2503	0.809055		31.4297	0.401928	40.542	0.517139	44.6597	0.236234	51.9063	0.794758		34.0497	0.54806	41.2187	0.54982	46.0563	0.356462	52.5623	0.636487					0.425333	0.525431	-0.578667	0.909293	0.798333	1.07853	0.344	1.60381		-2.19467	0.671563	-1.25533	0.941974	-0.598333
316	350	32	11.315	5	DEVRKEEWPLVDDCTGVTGYHEQLTIHGKDHESVF	20.005	0.399655	26.8897	0.26271	34.0223	0.776174	39.1613	0.785276		19.7783	0.376673	28.9747	0.292577	33.428	0.671652	39.4087	1.0323		20.9487	0.561219	29.785	0.853232	34.404	0.83399	39.6673	1.02814					0.226667	0.776328	-2.085	0.555287	0.594333	1.44783	-0.247333	1.81757		-0.943667	0.960873	-2.89533	1.11594	-0.381667
340	350	9	7.045	2	TIHGKDHESVF	13.3567	0.308234	21.8887	0.579245	25.6007	0.780491	25.6703	0.27801		13.6117	0.14236	22.2137	0.330769	25.285	0.0502295	25.9273	0.65127		14.0217	0.546134	22.096	0.916359	25.1467	0.885943	26.577	0.0569298					-0.255	0.450594	-0.325	0.910014	0.315667	0.830721	-0.257	0.929279		-0.665	0.854368	-0.207333	1.4956	0.454
355	369	13	9.02	4	WDCDRKFRVKIRGID	1.903	0.264484	5.376	0.35734	6.67533	0.517643	7.932	0.212558		1.83333	0.402572	5.84067	0.0808476	7.157	0.426877	8.16167	0.157532		1.82533	0.401288	5.88433	0.200889	7.094	0.205366	7.936	0.433522					0.0696667	0.667057	-0.464667	0.438188	-0.481667	0.94452	-0.229667	0.37009		0.0776667	0.665773	-0.508333	0.558229	-0.418667
355	379	21	10.505	4	WDCDRKFRVKIRGIDIPVLPRNTDL	13.5203	0.310692	18.439	0.389986	21.589	0.27563	25.465	0.34863		13.3103	0.0458294	19.3647	0.318999	21.9443	0.122067	26.106	0.589821		12.6127	0.623084	18.583	0.417637	21.2167	0.36541	25.438	0.326694					0.21	0.356521	-0.925667	0.708985	-0.355333	0.397697	-0.641	0.938451		0.907667	0.933775	-0.144	0.807623	0.372333
355	381	23	10.845	4	WDCDRKFRVKIRGIDIPVLPRNTDLTV	12.5843	0.0376342	18.7437	0.437418	23.974	1.029	26.83	1.14316		12.3967	0.149721	19.7967	0.0531256	24.3837	0.222545	27.2527	0.348124		11.0927	0.364506	18.6037	0.30147	22.6127	0.200143	26.4313	0.524429					0.187667	0.187355	-1.053	0.490543	-0.409667	1.25155	-0.422667	1.49128		1.49167	0.40214	0.14	0.738888	1.36133
370	381	9	10.255	2	IPVLPRNTDLTV	40.061	0.303788	51.9927	0.93205	61.62	0.779217	67.6497	0.444882		39.3643	0.140785	54.25	0.556191	61.0397	0.474309	67.001	0.686195		38.7523	0.566156	53.4327	0.420478	60.4013	0.835824	66.618	0.413068					0.696667	0.444572	-2.25733	1.48824	0.580333	1.25353	0.648667	1.13108		1.30867	0.869944	-1.44	1.35253	1.21867
382	394	11	9.395	2	FVEANIQHGQQVL	12.2287	0.146644	18.5007	0.619742	20.9383	0.16398	29.299	0.135842		11.376	0.137357	18.7937	0.182407	20.6887	0.250632	28.9153	0.426452		11.6	0.232181	18.8177	0.251588	21.2347	0.372768	29.386	0.453649					0.852667	0.284001	-0.293	0.802149	0.249667	0.414612	0.383667	0.562294		0.628667	0.378825	-0.317	0.87133	-0.296333
383	394	10	8.23	2	VEANIQHGQQVL	13.5673	0.146828	20.53	0.42749	23.384	0.277789	32.468	0.244178		12.6823	0.1045	20.913	0.208583	23.044	0.215799	32.058	0.566268		12.9077	0.383174	20.5857	0.355095	23.587	0.883099	32.36	0.178832					0.885	0.251328	-0.383	0.636074	0.34	0.493588	0.41	0.810446		0.659667	0.530002	-0.0556667	0.782585	-0.203
395	407	9	5.97	3	CQRRTSPKPFTEE	10.483	0.0783071	19.5447	0.340221	29.39	0.280533	35.5667	0.233582		9.98267	0.074272	20.3467	0.574984	29.1623	0.461212	35.8593	0.655946		9.92433	0.984213	21.2083	0.588568	29.6283	0.737724	36.9433	0.380654					0.500333	0.152579	-0.802	0.915205	0.227667	0.741745	-0.292667	0.889528		0.558667	1.06252	-1.66367	0.928789	-0.238333
414	428	12	10.925	3	LEFSIKIKDLPKGAL	6.325	0.293678	7.924	0.189692	13.318	0.355945	23.815	0.261742		6.46033	0.439252	8.95533	0.39975	14.6033	0.255206	25.8893	0.199803		7.25067	0.223225	12.8117	0.331888	19.9667	0.709101	29.6423	0.232672					-0.135333	0.73293	-1.03133	0.589442	-1.28533	0.611152	-2.07433	0.461545		-0.925667	0.516903	-4.88767	0.521579	-6.64867
417	431	12	10.88	4	SIKIKDLPKGALLNL	0.643333	0.0230723	1.74567	0.548139	3.054	0.366624	11.5973	0.384594		0.671	0.131685	2.39433	0.189906	4.07533	0.175654	13.0737	0.627352		1.69167	0.41167	7.27167	0.361553	10.7967	0.308853	16.5837	0.52515					-0.0276667	0.154758	-0.648667	0.738045	-1.02133	0.542278	-1.47633	1.01195		-1.04833	0.434743	-5.526	0.909692	-7.74267
432	441	7	9.315	1	QIYCGKAPAL	41.929	0.938504	40.447	0.890418	45.9523	0.533699	58.0257	0.86012		42.7963	1.16392	47.485	0.48591	49.7047	1.04647	61.0243	1.00603		44.8647	1.20927	52.434	0.309819	56.321	1.36642	70.2183	0.648414					-0.867333	2.10242	-7.038	1.37633	-3.75233	1.58016	-2.99867	1.86615		-2.93567	2.14777	-11.987	1.20024	-10.3687
463	468	4	13.67	2	YVNLLL	1.79133	0.297984	2.486	0.502394	8.058	0.617493	24.276	0.499364		2.06033	1.26888	2.708	0.615817	8.437	0.735535	24.5053	0.970996		2.977	1.62472	3.04167	1.10093	7.33867	1.41558	22.6143	0.233806					-0.269	1.56686	-0.222	1.11821	-0.379	1.35303	-0.229333	1.47036		-1.18567	1.92271	-0.555667	1.60332	0.719333
467	479	11	9.3	4	LLIDHRFLLRRGE	2.89167	0.44411	9.12033	0.170907	11.39	0.072808	14.4923	0.397407		2.79733	0.246666	9.91433	0.0489932	12.302	0.0190788	15.546	0.15094		3.08733	0.216915	9.63067	0.0801332	12.3803	0.369316	15.9023	0.457687					0.0943333	0.690776	-0.794	0.219901	-0.912	0.0918868	-1.05367	0.548347		-0.195667	0.661025	-0.510333	0.251041	-0.990333
467	480	12	9.76	4	LLIDHRFLLRRGEY	2.45367	0.120687	8.134	0.456429	10.3523	0.300487	13.097	0.319107		2.53533	0.120674	8.61367	0.0952698	10.793	0.147807	13.994	0.939619		3.14967	0.37516	8.402	0.502994	10.9933	0.575024	13.8767	0.495715					-0.0816667	0.241361	-0.479667	0.551698	-0.440667	0.448294	-0.897	1.25873		-0.696	0.495847	-0.268	0.959423	-0.641
467	484	16	10.755	4	LLIDHRFLLRRGEYVLHM	4.538	0.007	12.655	0.371784	17.088	0.154764	20.268	0.122589		4.27067	0.217718	13.5743	0.102344	17.3893	0.136537	21.0697	0.348841		4.12367	0.338544	13.4697	0.204074	16.98	0.379904	20.2757	0.298691					0.267333	0.224718	-0.919333	0.474128	-0.301333	0.291301	-0.801667	0.47143		0.414333	0.345544	-0.814667	0.575858	0.108
485	497	11	10.02	2	WQISGKGEDQGSF	53.2737	0.478444	57.3847	0.798494	60.275	0.164648	63.5393	0.672436		52.6763	0.870258	57.1307	1.1118	61.1453	1.11115	60.9557	1.05514		51.2603	0.683782	56.7743	0.57039	60.8673	1.14647	60.8713	0.328351					0.597333	1.3487	0.254	1.9103	-0.870333	1.2758	2.58367	1.72758		2.01333	1.16223	0.610333	1.36888	-0.592333
498	513	13	5.48	2	NADKLTSATNPDKENS	19.1553	0.111563	29.1137	0.746502	37.4023	0.822873	46.672	0.294998		19.45	0.360405	31.3287	0.511399	40.119	0.454608	53.902	1.34917		22.5787	0.297497	34.958	0.914003	45.494	0.613142	59.309	0.969006					-0.294667	0.471968	-2.215	1.2579	-2.71667	1.27748	-7.23	1.64417		-3.42333	0.40906	-5.84433	1.6605	-8.09167
498	514	14	6.655	3	NADKLTSATNPDKENSM	17.883	0.080181	30.1997	0.460113	37.9273	0.928668	46.4773	0.109665		17.9823	0.381264	32.7403	0.985099	40.0227	0.99535	52.4673	1.08955		20.3543	0.647622	34.3087	0.775687	45.6887	0.998722	57.5083	0.490965					-0.0993333	0.461445	-2.54067	1.44521	-2.09533	1.92402	-5.99	1.19921		-2.47133	0.727803	-4.109	1.2358	-7.76133
498	515	15	6.47	3	NADKLTSATNPDKENSMS	16.0563	0.205352	26.8407	0.0976183	33.6377	0.247577	41.1237	0.314034		16.2467	0.324186	29.18	0.453931	35.8247	0.955605	47.053	0.82558		18.6163	0.958967	31.2727	1.04104	39.3683	1.1597	51.733	0.477758					-0.190333	0.529537	-2.33933	0.551549	-2.187	1.20318	-5.92933	1.13961		-2.56	1.16432	-4.432	1.13866	-5.73067
498	517	17	7.495	3	NADKLTSATNPDKENSMSIS	14.0193	0.0575007	23.6107	0.394165	29.393	0.481667	36.0507	0.385969		13.7567	0.284284	25.1463	0.334008	30.8237	0.333752	41.0593	1.01989		15.5077	0.569238	26.922	0.595035	34.9193	0.790989	45.264	0.198824					0.262667	0.341785	-1.53567	0.728173	-1.43067	0.815419	-5.00867	1.40586		-1.48833	0.626739	-3.31133	0.989201	-5.52633
500	515	13	6.23	3	DKLTSATNPDKENSMS	19.3127	0.26001	30.4893	0.880229	36.6657	0.578102	44.7797	0.499889		18.193	0.706057	32.144	1.15112	38.3563	0.76098	51.0157	0.629057		18.579	0.469371	32.36	0.624465	43.0853	1.32654	56.3013	0.416606					1.11967	0.966068	-1.65467	2.03135	-1.69067	1.33908	-6.236	1.12895		0.733667	0.729381	-1.87067	1.50469	-6.41967
520	551	24	9.065	4	LDNYCHPIALPKHQPTPDPEGDRVRAEMPNQL	38.6873	0.367282	44.2157	0.715685	46.7243	0.768182	48.5807	0.258098		39.0267	0.320675	45.3493	0.665355	46.797	0.855995	48.9133	0.883146		40.979	1.09407	45.45	1.15532	45.0587	1.00848	49.7817	1.15935					-0.339333	0.687957	-1.13367	1.38104	-0.0726667	1.62418	-0.332667	1.14124		-2.29167	1.46135	-1.23433	1.871	1.66567
557	592	30	11.155	5	AIIATDPLNPLTAEDKELLWHFRYESLKHPKAYPKL	9.48733	0.10451	19.6077	0.718258	31.537	0.774723	50.3637	0.754672		9.71533	0.114962	22.8337	0.680422	39.789	0.678652	61.4753	0.580336		35.853	0.594995	49.6183	0.473989	58.5737	0.585587	67.7597	0.259951					-0.228	0.219472	-3.226	1.39868	-8.252	1.45338	-11.1117	1.33501		-26.3657	0.699505	-30.0107	1.19225	-27.0367
558	573	12	10.68	2	IIATDPLNPLTAEDKE	24.7053	0.102929	39.4747	0.898159	54.3473	0.652105	63.429	0.831399		26.068	0.277712	46.2627	0.657863	56.2063	0.751996	67.7003	0.71895		47.044	0.300032	59.359	0.976124	64.1477	0.54972	68.2603	0.792979					-1.36267	0.380641	-6.788	1.55602	-1.859	1.4041	-4.27133	1.55035		-22.3387	0.40296	-19.8843	1.87428	-9.80033
558	578	17	13.93	3	IIATDPLNPLTAEDKELLWHF	14.6193	0.39274	22.3967	1.07701	34.188	0.208545	44.0617	0.638834		15.5693	0.491155	28.665	0.59604	37.482	0.432751	54.5607	0.261615		35.2957	0.896619	46.2563	0.739271	52.0947	0.82792	59.9793	0.748947					-0.95	0.883895	-6.26833	1.67305	-3.294	0.641295	-10.499	0.900448		-20.6763	1.28936	-23.8597	1.81628	-17.9067
579	592	10	6.53	4	RYESLKHPKAYPKL	2.17233	0.148372	9.701	0.381747	19.1217	0.323636	39.999	0.217998		5.592	0.413943	15.2463	0.725598	28.4607	0.105685	49.9783	0.820722		32.8257	1.002	37.866	0.992286	44.747	0.681615	51.622	0.591921					-3.41967	0.562316	-5.54533	1.10735	-9.339	0.429321	-9.97933	1.03872		-30.6533	1.15038	-28.165	1.37403	-25.6253
593	601	7	9.1	1	FSSVKWGQQ	5.446	1.35977	14.701	0.782399	34.9783	0.919926	70.3853	0.537848		6.75533	1.0071	20.7647	0.645571	48.8657	0.524864	75.5837	0.582824		45.3407	1.0746	58.4743	0.716369	67.9663	0.466159	73.0803	0.432465					-1.30933	2.36686	-6.06367	1.42797	-13.8873	1.44479	-5.19833	1.12067		-39.8947	2.43437	-43.7733	1.49877	-32.988
593	605	11	10.61	2	FSSVKWGQQEIVA	7.04833	0.190616	15.306	0.792365	30.859	1.13969	63.817	0.426848		7.93333	0.331115	22.2863	0.571617	42.5457	1.3285	73.0187	1.24827		41.4397	0.951977	55.3073	0.70456	67.4293	1.19164	74.4027	0.385521					-0.885	0.521731	-6.98033	1.36398	-11.6867	2.46818	-9.20167	1.67512		-34.3913	1.14259	-40.0013	1.49693	-36.5703
593	610	16	10.885	2	FSSVKWGQQEIVAKTYQL	4.617	0.268736	10.2923	0.265003	22.6937	0.300087	59.367	0.548449		4.68667	0.236276	23.3343	0.863708	40.5593	0.478661	75.774	0.667865		44.5867	0.524866	56.0373	0.596852	67.0157	0.294865	73.3427	0.66794					-0.0696667	0.505012	-13.042	1.12871	-17.8657	0.778748	-16.407	1.21631		-39.9697	0.793602	-45.745	0.861855	-44.322
593	611	17	12.395	3	FSSVKWGQQEIVAKTYQLL	3.01067	0.112305	7.70833	0.289217	18.9677	0.0198578	53.9347	0.449558		2.984	0.090901	9.65633	0.701531	31.258	1.43013	70.758	0.754703		33.0717	0.641827	45.16	0.429312	59.5197	1.0527	77.3423	1.25135					0.0266667	0.203206	-1.948	0.990747	-12.2903	1.44998	-16.8233	1.20426		-30.061	0.754132	-37.4517	0.718529	-40.552
612	622	9	9.345	3	ARREVWDQSAL	62.397	0.241249	63.1073	0.648369	64.8317	0.515156	66.0307	0.270914		61.8243	0.399421	65.228	0.740869	64.545	0.116116	65.7983	0.498562		63.084	0.700491	63.1107	0.562139	63.9113	0.922255	65.3193	0.483353					0.572667	0.64067	-2.12067	1.38924	0.286667	0.631272	0.232333	0.769476		-0.687	0.941739	-0.00333333	1.21051	0.920333
623	630	6	12.295	1	DVGLTMQL	5.547	0.409904	14.5113	0.72039	22.9617	0.777692	45.3817	0.888156		7.97067	1.38336	27.2847	1.02504	36.6447	0.289899	63.5643	0.754194		39.1693	0.529212	56.0913	0.14817	64.941	0.779633	76.594	0.397295					-2.42367	1.79326	-12.7733	1.74543	-13.683	1.06759	-18.1827	1.64235		-33.6223	0.939116	-41.58	0.86856	-41.9793
623	631	7	13.745	2	DVGLTMQLL	3.29767	0.520429	12.9877	0.252243	18.0747	0.93912	36.395	0.185712		4.937	0.765994	15.706	0.375501	26.5953	0.478566	46.08	0.479637		34.301	0.752584	53.4177	0.463666	60.2633	1.12826	69.3343	0.757856					-1.63933	1.28642	-2.71833	0.627744	-8.52067	1.41769	-9.685	0.66535		-31.0033	1.27301	-40.43	0.715909	-42.1887
631	635	3	10.88	1	LDCNF	3.28933	0.342199	20.2703	1.04752	51.4127	0.751658	65.7487	1.021		5.388	1.10058	27.598	0.687101	56.6623	0.667424	65.4677	1.06284		35.121	1.13726	52.738	0.745889	62.504	1.25889	64.8593	0.743835					-2.09867	1.44278	-7.32767	1.73463	-5.24967	1.41908	0.281	2.08384		-31.8317	1.47946	-32.4677	1.79341	-11.0913
634	642	7	7.475	2	NFSDENVRA	16.2607	0.295026	19.6843	0.892695	24.8617	0.545492	29.2623	0.0938527		16.6467	0.174872	21.537	0.241998	27.212	0.950527	35.0477	0.535		28.3283	0.947996	43.979	0.264388	50.925	0.41561	55.1733	0.957					-0.386	0.469898	-1.85267	1.13469	-2.35033	1.49602	-5.78533	0.628853		-12.0677	1.24302	-24.2947	1.15708	-26.0633
636	642	5	4.715	2	SDENVRA	8.38367	0.0824702	10.2767	0.426624	15.831	0.306535	23.8937	0.493474		9.21233	0.403138	13.0803	0.750071	21.334	0.519287	30.887	0.645833		21.5767	0.635525	42.8787	0.398154	52.0977	0.210533	59.4923	0.396427					-0.828667	0.485608	-2.80367	1.1767	-5.503	0.825822	-6.99333	1.13931		-13.193	0.717995	-32.602	0.824778	-36.2667
643	657	13	11.6	2	IAVQKLESLEDDDVL	11.918	0.203649	15.9363	0.401818	20.1037	0.168986	33.755	0.234527		11.3847	0.175044	17.3697	0.218212	22.5273	0.628993	34.6843	0.247553		13.5593	0.762592	24.2393	1.00525	35.288	0.70387	46.5147	0.770076					0.533333	0.378693	-1.43333	0.620029	-2.42367	0.797979	-0.929333	0.48208		-1.64133	0.966241	-8.303	1.40707	-15.1843
643	662	18	13.57	3	IAVQKLESLEDDDVLHYLLQ	6.44233	0.236716	10.4383	0.222534	16.8727	0.295068	27.8407	0.204287		6.282	0.306795	11.6557	0.207534	18.873	0.281952	29.3883	0.160051		7.25933	0.0705006	19.1043	0.363118	27.4967	0.517322	39.6603	0.752259					0.160333	0.54351	-1.21733	0.430068	-2.00033	0.57702	-1.54767	0.364338		-0.817	0.307216	-8.666	0.585651	-10.624
651	663	11	14.475	3	LEDDDVLHYLLQL	0.534667	0.470502	1.86233	0.654316	13.3623	0.961843	23.3017	1.0305		0.477333	0.442025	5.34167	0.512117	15.4257	0.37324	23.0503	0.969941		0.933333	0.646359	11.994	0.129503	16.9477	0.386607	26.2843	0.335311					0.0573333	0.912527	-3.47933	1.16643	-2.06333	1.33508	0.251333	2.00044		-0.398667	1.11686	-10.1317	0.783819	-3.58533
652	662	9	13.435	3	EDDDVLHYLLQ	0.718333	0.631698	3.475	0.304708	13.081	0.0936162	28.0783	0.661899		0.493	0.77666	5.25533	0.0890187	16.0947	0.561186	27.9773	0.708266		2.57733	0.928419	10.7607	1.25536	18.236	1.17456	31.2707	0.663503					0.225333	1.40836	-1.78033	0.393727	-3.01367	0.654802	0.101	1.37017		-1.859	1.56012	-7.28567	1.56007	-5.155
654	662	7	13.225	2	DDVLHYLLQ	1.04	0.283861	3.17467	0.186176	16.2353	1.17666	30.097	0.718919		0.933667	0.546902	4.10967	0.588167	19.0277	0.434367	31.329	0.9447		3.18033	0.15673	12.6257	0.507606	22.853	0.456714	38.0043	0.839955					0.106333	0.830763	-0.935	0.774342	-2.79233	1.61103	-1.232	1.66362		-2.14033	0.440591	-9.451	0.693782	-6.61767
655	662	6	13.05	2	DVLHYLLQ	1.07667	0.151133	4.59033	0.226377	18.957	0.616243	36.2953	0.301366		1.20367	0.407134	7.13833	0.601583	23.222	0.898721	37.2473	0.17654		2.376	0.20039	15.1243	0.493618	25.757	0.54578	43.311	0.652473					-0.127	0.558268	-2.548	0.82796	-4.265	1.51496	-0.952	0.477906		-1.29933	0.351523	-10.534	0.719994	-6.8
655	663	7	14.5	2	DVLHYLLQL	1.09733	0.142581	4.66867	0.0316596	19.1047	0.450283	35.5747	0.46279		0.778667	0.217744	6.80633	0.460006	23.308	0.148455	36.2037	0.182155		2.50767	0.0457857	14.9047	0.511942	26.0183	0.516318	42.259	0.130817					0.318667	0.360325	-2.13767	0.491665	-4.20333	0.598738	-0.629	0.644944		-1.41033	0.188367	-10.236	0.543601	-6.91367
663	677	12	9.95	3	LVQAVKFEPYHDSAL	2.17467	0.153383	6.53467	0.34742	7.71133	0.514573	10.7667	0.0946273		2.3	0.185086	7.01033	0.240849	7.46133	0.101298	11.225	0.16857		4.81433	0.405691	7.37167	0.179288	9.28467	0.168717	13.4647	0.387095					-0.125333	0.338469	-0.475667	0.588269	0.25	0.615871	-0.458333	0.263198		-2.63967	0.559074	-0.837	0.526708	-1.57333
664	677	11	9.385	2	VQAVKFEPYHDSAL	2.42867	0.34849	7.63333	0.675522	8.51267	0.280917	11.6883	0.331428		2.387	0.28007	7.94267	0.437038	8.63933	0.215584	12.4253	0.114771		5.903	0.434869	8.33733	0.382541	10.6173	0.182212	15.6827	0.457301					0.0416667	0.62856	-0.309333	1.11256	-0.126667	0.496501	-0.737	0.446199		-3.47433	0.783359	-0.704	1.05806	-2.10467
666	677	9	9.15	2	AVKFEPYHDSAL	3.10533	0.270304	9.029	0.548911	10.208	0.11407	14.679	0.0453982		3.191	0.301796	9.41433	0.0308275	10.3287	0.415411	14.8603	0.19009		6.543	0.339743	10.0137	0.560835	12.5117	0.627106	18.598	0.294292					-0.0856667	0.5721	-0.385333	0.579738	-0.120667	0.529481	-0.181333	0.235489		-3.43767	0.610047	-0.984667	1.10975	-2.30367
681	697	15	10.455	4	LLKRGLRNKRIGHFLFW	0.396667	0.225019	0.422667	0.0813286	0.801	0.118051	1.47467	0.118564		0.36	0.104933	0.627	0.172218	0.562333	0.0687047	1.55967	0.0517333		0.530667	0.149132	0.511333	0.100027	0.678333	0.137791	1.609	0.0877895					0.0366667	0.329952	-0.204333	0.253546	0.238667	0.186756	-0.085	0.170297		-0.134	0.37415	-0.0886667	0.181355	0.122667
681	699	17	12.6	5	LLKRGLRNKRIGHFLFWFL	0.367333	0.237921	0.413667	0.101928	0.446	0.0620725	0.694333	0.1671		0.33	0.236057	0.472667	0.237597	0.499333	0.0634455	0.63	0.131697		0.400667	0.103176	0.190333	0.0808476	0.577667	0.0725282	0.730333	0.258345					0.0373333	0.473978	-0.059	0.339525	-0.0533333	0.125518	0.0643333	0.298796		-0.0333333	0.341097	0.223333	0.182776	-0.131667
698	713	14	7.815	4	FLRSEIAQSRHYQQRF	3.77667	0.190956	7.335	0.151858	16.8673	0.59865	28.7123	0.38614		4.17967	0.231087	8.93667	0.306017	17.7277	0.488365	29.706	0.842041		5.32567	0.31258	13.0003	0.422873	21.6263	0.88576	33.2163	0.714015					-0.403	0.422044	-1.60167	0.457875	-0.860333	1.08702	-0.993667	1.22818		-1.549	0.503536	-5.66533	0.574731	-4.759
700	713	12	6.23	4	RSEIAQSRHYQQRF	2.80867	0.383004	6.56733	1.17317	14.788	1.39395	25.9557	0.931524		3.056	0.252719	7.09967	0.521576	15.7927	1.00892	26.7417	1.2458		5.304	0.507291	12.445	0.111301	20.5373	0.454881	30.0053	1.06225					-0.247333	0.635724	-0.532333	1.69474	-1.00467	2.40286	-0.786	2.17732		-2.49533	0.890295	-5.87767	1.28447	-5.74933
729	738	8	9.365	2	LHDFTQQVQV	1.55067	0.0743326	1.25333	0.291001	1.449	0.0550545	1.50933	0.0560833		1.44	0.0989747	1.53267	0.0472264	1.515	0.0770779	1.81167	0.182467		1.512	0.0864696	6.71667	0.511746	12.7287	1.16863	28.6367	0.799658					0.110667	0.173307	-0.279333	0.338227	-0.066	0.132132	-0.302333	0.238551		0.0386667	0.160802	-5.46333	0.802747	-11.2797
730	737	6	6.625	1	HDFTQQVQ	1.70233	0.339073	0.651333	0.220749	1.435	0.258687	2.54133	0.53514		0.886667	0.406104	1.769	1.34307	1.577	0.508204	2.70867	0.584836		3.726	0.914648	4.242	0.359939	9.75	1.16706	30.965	0.561957					0.815667	0.745177	-1.11767	1.56382	-0.142	0.766891	-0.167333	1.11998		-2.02367	1.25372	-3.59067	0.580688	-8.315
730	738	7	8.545	1	HDFTQQVQV	4.51333	0.415563	3.62833	0.468637	3.88833	0.361353	4.67667	0.751769		4.462	0.466391	5.054	0.614432	4.79233	0.294802	5.386	0.615782		6.16733	0.637224	9.15267	0.432617	12.4507	1.16803	37.1793	0.267255					0.0513333	0.881954	-1.42567	1.08307	-0.904	0.656156	-0.709333	1.36755		-1.654	1.05279	-5.52433	0.901254	-8.56233
732	737	4	5.89	1	FTQQVQ	1.326	0.356849	1.64	0.295452	1.962	0.549954	3.79167	0.546558		1.34	0.917536	2.03233	0.726221	2.607	0.121577	4.743	0.969262		2.53633	0.480409	12.7067	0.842758	18.436	0.89723	32.8303	0.805341					-0.014	1.27438	-0.392333	1.02167	-0.645	0.671531	-0.951333	1.51582		-1.21033	0.837257	-11.0667	1.13821	-16.474
732	738	5	8.47	1	FTQQVQV	2.76267	0.753779	2.724	0.822497	1.92033	0.370175	3.30267	1.03876		4.09167	1.26325	4.09067	1.34646	5.259	1.44766	4.29533	1.09233		7.74767	0.415122	14.6287	0.176001	23.4807	0.581509	36.745	0.171869					-1.329	2.01703	-1.36667	2.16896	-3.33867	1.81784	-0.992667	2.13108		-4.985	1.1689	-11.9047	0.998498	-21.5603
742	747	4	8.52	1	LQKVTL	6.768	0.386873	31.1297	0.841164	57.7987	0.212218	78.7633	0.299067		6.79367	0.304264	34.9003	0.723942	57.8947	0.401064	79.7333	0.100605		29.5137	0.520497	54.509	0.689	70.2587	0.79811	86.5653	0.308711					-0.0256667	0.691137	-3.77067	1.56511	-0.096	0.613282	-0.97	0.399672		-22.7457	0.907371	-23.3793	1.53016	-12.46
742	782	38	12.6	5	LQKVTLDIKSLSAEKYDVSSQVISQLKQKLENLQNSQLPES	48.899	0.582804	65.7683	0.562218	72.4517	0.37582	73.9457	0.906479		48.14	0.274869	67.4933	0.213132	70.9703	0.431674	73.8557	1.14587		50.313	0.329892	68.7137	1.1456	69.4333	0.689445	73.7833	0.901537					0.759	0.857673	-1.725	0.77535	1.48133	0.807493	0.09	2.05235		-1.414	0.912697	-2.94533	1.70781	3.01833
748	767	18	11.355	3	DIKSLSAEKYDVSSQVISQL	73.9383	0.490971	75.037	0.926948	76.3967	0.988271	76.9443	0.79786		73.461	0.496274	75.82	0.072753	75.302	0.773804	76.638	0.441929		72.476	0.462879	75.8937	0.5345	74.277	0.722839	76.318	0.35168					0.477333	0.987245	-0.783	0.999701	1.09467	1.76208	0.306333	1.23979		1.46233	0.95385	-0.856667	1.46145	2.11967
748	782	32	12.65	5	DIKSLSAEKYDVSSQVISQLKQKLENLQNSQLPES	57.1717	0.252951	73.355	0.158152	78.689	0.70323	79.331	0.575931		56.1713	0.479202	74.9033	0.417409	77.4047	0.491858	78.9707	1.11757		57.765	0.916002	75.935	0.636468	76.6453	0.219275	78.6787	0.970523					1.00033	0.732153	-1.54833	0.575561	1.28433	1.19509	0.360333	1.6935		-0.593333	1.16895	-2.58	0.794619	2.04367
755	782	25	12.395	4	EKYDVSSQVISQLKQKLENLQNSQLPES	51.806	0.502764	74.1703	0.267358	79.651	0.248562	80.1897	0.540597		50.886	0.48405	74.7873	0.477619	78.48	0.312735	79.581	0.589535		54.2163	1.19306	74.7877	1.04529	76.7647	1.12577	80.014	0.80051					0.92	0.986814	-0.617	0.744978	1.171	0.561297	0.608667	1.13013		-2.41033	1.69583	-0.617333	1.31264	2.88633
768	782	12	7.38	2	KQKLENLQNSQLPES	36.9667	0.2505	64.298	1.17201	75.2013	0.820516	75.7057	0.504304		36.2213	0.0977616	66.591	0.638912	74.261	0.311292	75.4443	1.05727		49.2807	1.21182	70.258	0.871666	74.3863	0.955408	75.7263	0.713483					0.745333	0.348262	-2.293	1.81093	0.940333	1.13181	0.261333	1.56157		-12.314	1.46232	-5.96	2.04368	0.815
783	796	10	10.475	3	FRVPYDPGLKAGAL	1.289	0.0901166	4.44233	0.122676	15.5883	0.317582	25.13	0.350749		1.52533	0.603726	5.29767	0.161299	16.1323	0.233669	25.2797	0.452884		27.1787	1.10744	28.1063	0.81812	31.274	0.597665	38.4623	0.485792					-0.236333	0.693843	-0.855333	0.283975	-0.544	0.551251	-0.149667	0.803634		-25.8897	1.19756	-23.664	0.940796	-15.6857
797	815	16	10.54	2	AIEKCKVMASKKKPLWLEF	8.86033	0.10651	13.574	0.682165	20.2883	0.700796	23.45	0.671015		8.82367	0.10851	14.649	0.203892	20.269	0.384501	23.5873	0.477595		19.1073	0.470567	25.9543	0.726617	29.1817	0.753669	33.4497	0.933224					0.0366667	0.215019	-1.075	0.886057	0.0193333	1.0853	-0.137333	1.14861		-10.247	0.577077	-12.3803	1.40878	-8.89333
816	829	11	8.435	2	KCADPTALSNETIG	36.7817	0.285868	57.347	1.22864	64.8753	0.922974	69.705	0.517696		35.8207	0.339797	59.1607	0.281617	64.3083	0.992585	69.276	0.701468		42.0337	1.16626	62.4963	0.233464	65.433	0.584783	68.0047	0.786373					0.961	0.625665	-1.81367	1.51026	0.567	1.91556	0.429	1.21916		-5.252	1.45213	-5.14933	1.46211	-0.557667
816	842	24	12.16	4	KCADPTALSNETIGIIFKHGDDLRQDM	17.5713	0.100082	30.8383	0.918245	38.904	0.69111	42.5273	1.46718		17.3473	0.376072	33.2833	0.510331	39.3907	0.280454	42.8143	0.712984		22.7063	1.11915	38.006	1.56621	43.403	0.778454	49.0387	0.558883					0.224	0.476154	-2.445	1.42858	-0.486667	0.971564	-0.287	2.18017		-5.135	1.21924	-7.16767	2.48446	-4.499
832	845	12	9.89	4	FKHGDDLRQDMLIL	2.51	0.341009	10.171	0.179134	17.4337	0.918784	21.117	0.090835		2.66967	0.0646942	13.0373	0.67078	19.4923	0.548004	21.9907	0.543918		11.3563	0.920495	23.76	0.784094	28.9177	1.25357	31.5577	0.303447					-0.159667	0.405703	-2.86633	0.849914	-2.05867	1.46679	-0.873667	0.634753		-8.84633	1.2615	-13.589	0.963228	-11.484
844	852	7	13.33	2	ILQILRIME	1.474	0.754489	0.946667	0.667504	0.831	0.356849	1.90367	1.0177		2.35933	1.2696	1.39767	1.36501	0.691333	0.155513	2.34033	0.99851		1.53967	0.391181	5.68433	1.0152	15.4307	0.295121	32.137	0.785555					-0.885333	2.02409	-0.451	2.03252	0.139667	0.512362	-0.436667	2.01621		-0.0656667	1.14567	-4.73767	1.6827	-14.5997
849	862	12	13.445	2	RIMESIWETESLDL	4.85433	0.760816	8.78733	0.452964	18.6893	0.95385	33.1897	0.269862		4.22833	0.478537	9.573	0.510301	18.4863	1.32934	32.0907	0.709221		14.2707	1.04438	30.832	0.591837	37.3173	0.210738	50.9337	0.837975					0.626	1.23935	-0.785667	0.963265	0.203	2.28319	1.099	0.979083		-9.41633	1.80519	-22.0447	1.0448	-18.628
853	861	7	11.74	1	SIWETESLD	7.52633	0.195296	13.337	0.475243	25.7927	0.393772	39.0027	0.774572		5.98533	0.359607	14.8537	0.330933	25.432	0.429585	37.5033	0.627129		25.2317	0.927178	41.2527	0.159594	48.452	0.943084	58.9647	0.557731					1.541	0.554903	-1.51667	0.806176	0.360667	0.823357	1.49933	1.4017		-17.7053	1.12247	-27.9157	0.634837	-22.6593
853	862	8	13.57	1	SIWETESLDL	6.001	0.599623	10.795	0.121791	23.3703	0.239009	41.4553	1.06078		5.29633	0.0613705	11.5677	0.580677	22.5073	1.15523	39.5483	1.27033		21.314	0.152699	42.6987	0.679581	49.255	1.0541	59.6167	0.725348					0.704667	0.660994	-0.772667	0.702467	0.863	1.39424	1.907	2.33111		-15.313	0.752322	-31.9037	0.801372	-25.8847
862	878	14	13.24	2	LCLLPYGCISTGDKIGM	2.336	0.179677	5.49833	0.563537	13.6197	0.682178	25.507	0.398358		2.69433	0.0925545	7.391	0.233489	14.315	0.442078	25.8037	0.829508		22.6333	1.03495	30.5143	0.412541	34.1537	1.20928	43.2157	0.827058					-0.358333	0.272232	-1.89267	0.797026	-0.695333	1.12426	-0.296667	1.22787		-20.2973	1.21463	-25.016	0.976079	-20.534
863	878	13	12.21	2	CLLPYGCISTGDKIGM	2.517	0.145681	6.93633	0.289118	15.4863	0.497265	27.6323	0.393983		3.04267	0.114823	8.75567	0.227869	16.4487	0.172631	27.5913	0.890057		23.0197	1.15493	32.2077	0.739439	36.2317	0.913495	45.8583	0.747735					-0.525667	0.260504	-1.81933	0.516987	-0.962333	0.669895	0.041	1.28404		-20.5027	1.30061	-25.2713	1.02856	-20.7453
865	878	12	10.63	2	LPYGCISTGDKIGM	3.657	0.206175	6.984	0.476605	16.33	0.509557	24.8893	0.823478		4.09633	0.479994	9.104	0.500047	16.729	0.69417	24.3427	0.12987		31.205	1.2155	38.071	0.437926	47.0127	0.633467	52.3007	1.11832					-0.439333	0.686169	-2.12	0.976652	-0.399	1.20373	0.546667	0.953349		-27.548	1.42168	-31.087	0.91453	-30.6827
879	887	7	7.405	1	IEIVKDATT	26.666	0.188053	42.4737	0.811355	53.0163	0.979819	55.6363	0.763682		25.2783	0.39425	43.825	0.944835	53.3543	0.576418	57.035	0.356257		41.417	1.05347	58.7563	1.10119	63.514	0.790512	67.8487	0.642358					1.38767	0.582304	-1.35133	1.75619	-0.338	1.55624	-1.39867	1.11994		-14.751	1.24152	-16.2827	1.91255	-10.4977
888	901	12	6.37	2	IAKIQQSTVGNTGA	51.6413	0.583027	55.787	0.440164	60.5017	1.23695	68.999	0.600606		50.879	0.282	55.8073	0.591434	60.773	0.967389	69.063	0.88302		62.1277	0.870398	65.427	1.12821	66.5963	1.50198	72.3363	1.04812					0.762333	0.865027	-0.0203333	1.0316	-0.271333	2.20434	-0.064	1.48363		-10.4863	1.45342	-9.64	1.56837	-6.09467
902	910	7	10.325	3	FKDEVLNHW	1.69733	0.922719	3.96767	0.811018	11.217	0.546885	19.8637	0.82665		2.41233	0.405063	4.29733	0.670836	12.467	0.497465	23.8773	0.553363		17.793	0.120449	22.5073	0.840134	26.7237	0.841473	30.789	0.738647					-0.715	1.32778	-0.329667	1.48185	-1.25	1.04435	-4.01367	1.38001		-16.0957	1.04317	-18.5397	1.65115	-15.5067
908	924	14	7.315	3	NHWLKEKSPTEEKFQAA	10.5833	0.625503	17.7503	0.184014	24.0977	0.198586	40.213	0.84038		10.5073	0.958105	18.802	0.851547	24.6953	1.04859	40.7423	1.32199		31.634	0.190575	39.2443	0.548084	44.0413	0.853446	51.398	0.170871					0.076	1.58361	-1.05167	1.03556	-0.597667	1.24718	-0.529333	2.16237		-21.0507	0.816079	-21.494	0.732099	-19.9437
927	934	6	8.645	2	RFVYSCAG	1.32167	0.218092	1.859	0.564344	1.74567	0.555914	1.76167	0.431359		1.29167	0.379233	1.70067	0.537089	2.51267	0.719276	2.18033	0.437653		18.5767	1.03226	36.4083	0.306636	39.489	0.99646	48.7327	0.831946					0.03	0.597325	0.158333	1.10143	-0.767	1.27519	-0.418667	0.869012		-17.255	1.25036	-34.5493	0.870979	-37.7433
935	939	3	7.17	1	YCVAT	0.813	0.459395	1.36433	0.501008	1.524	0.261542	1.25833	0.411826		1.13733	0.482354	1.816	0.245624	1.86133	0.851743	2.60933	1.09603		4.42233	0.883388	16.9133	0.946848	25.1877	0.494743	36.571	0.798722					-0.324333	0.941749	-0.451667	0.746632	-0.337333	1.11328	-1.351	1.50785		-3.60933	1.34278	-15.549	1.44786	-23.6637
940	953	12	10.86	2	FVLGIGDRHNDNIM	1.025	0.0710141	2.27967	0.139658	6.30867	0.334709	11.0723	0.321628		1.46067	0.335704	3.63767	0.182837	8.46067	0.285009	12.3433	0.211666		12.7277	0.161593	19.296	0.722709	23.068	0.212205	27.383	0.13164					-0.435667	0.406718	-1.358	0.322495	-2.152	0.619719	-1.271	0.533293		-11.7027	0.232607	-17.0163	0.862367	-16.7593
954	960	5	7.86	1	ITETGNL	4.217	0.0620967	17.3883	0.647806	27.2707	0.462065	33.7573	0.189083		4.24967	0.222622	18.963	0.655204	27.9787	0.148399	35.962	0.216613		33.0257	0.309926	41.619	1.22751	45.7657	0.957077	51.0043	0.437873					-0.0326667	0.284718	-1.57467	1.30301	-0.708	0.610465	-2.20467	0.405695		-28.8087	0.372023	-24.2307	1.87532	-18.495
954	961	6	11.51	1	ITETGNLF	4.41367	1.38904	12.657	0.655096	19.2903	1.15596	22.894	0.0779679		5.65633	1.26773	14.6273	0.794618	19.5487	0.511318	24.0067	0.541046		35.729	1.28775	41.6933	0.93453	44.828	0.0780449	48.9987	1.01908					-1.24267	2.65677	-1.97033	1.44971	-0.258333	1.66728	-1.11267	0.619014		-31.3153	2.67679	-29.0363	1.58963	-25.5377
954	976	21	14.03	4	ITETGNLFHIDFGHILGNYKSFL	29.8753	0.643321	33.3367	0.836532	35.1143	0.776005	36.6913	0.644426		30.4483	0.732493	33.6977	1.0133	34.139	0.25721	37.6787	0.664909		23.9767	0.950398	32.9147	0.968779	35.5123	0.492716	36.5323	0.898233					-0.573	1.37581	-0.361	1.84983	0.975333	1.03322	-0.987333	1.30933		5.89867	1.59372	0.422	1.80531	-0.398
961	972	10	12.925	3	FHIDFGHILGNY	33.31	0.387097	37.169	1.0412	39.8663	0.175147	43.528	0.219356		33.6177	0.267792	38.796	0.281174	40.3077	0.28227	44.7777	0.420481		29.3743	0.573747	37.2047	0.420816	40.3157	0.580733	44.0327	0.948271					-0.307667	0.654888	-1.627	1.32237	-0.441333	0.457417	-1.24967	0.639837		3.93567	0.960844	-0.0356667	1.46201	-0.449333
961	976	14	13.53	4	FHIDFGHILGNYKSFL	47.4187	0.221019	48.5777	1.43786	50.3083	0.582351	52.5767	0.732277		46.9067	0.294992	49.6837	0.572458	50.104	0.574823	53.0923	0.583841		39.642	1.29851	47.1973	0.583774	48.4267	1.29387	52.3247	0.522309					0.512	0.516011	-1.106	2.01032	0.204333	1.15717	-0.515667	1.31612		7.77667	1.51953	1.38033	2.02163	1.88167
962	975	12	11.565	4	HIDFGHILGNYKSF	43.5123	0.0669353	45.7013	1.14212	48.8767	0.545502	50.767	0.293041		42.4557	0.391339	47.7053	0.0704012	48.551	0.357929	51.2697	0.655692		33.4997	0.541665	42.941	0.850894	46.2007	0.775672	48.7463	0.578502					1.05667	0.458274	-2.004	1.21252	0.325667	0.903431	-0.502667	0.948733		10.0127	0.608601	2.76033	1.99302	2.676
973	992	16	12.89	4	KSFLGINKERVPFVLTPDFL	22.5067	0.229269	24.7827	0.466642	27.548	0.177663	28.7227	0.405692		22.3877	0.221861	26.721	0.332366	31.079	0.230417	48.4543	0.162149		28.0007	0.712057	39.9513	1.15881	46.9423	0.67814	54.576	0.465224					0.119	0.45113	-1.93833	0.799007	-3.531	0.40808	-19.7317	0.567842		-5.494	0.941326	-15.1687	1.62546	-19.3943
976	992	13	13.265	3	LGINKERVPFVLTPDFL	16.9197	0.278568	19.758	0.427442	23.068	0.135237	24.4257	0.242368		17.256	0.239268	22.3497	0.22509	27.9617	0.181473	49.2607	0.289995		27.6413	0.050856	40.7853	1.13246	47.9693	0.886116	56.498	0.919614					-0.336333	0.517836	-2.59167	0.652532	-4.89367	0.31671	-24.835	0.532364		-10.7217	0.329424	-21.0273	1.5599	-24.9013
977	992	12	13.17	3	GINKERVPFVLTPDFL	13.098	0.217621	16.4113	0.441335	19.9317	0.466676	21.271	0.0230651		13.1083	0.174701	19.0017	0.346989	24.3823	0.369216	47.73	0.419004		23.5077	0.782598	38.1233	1.15503	46.502	0.54627	55.1983	1.32169					-0.0103333	0.392322	-2.59033	0.788324	-4.45067	0.835892	-26.459	0.442069		-10.4097	1.00022	-21.712	1.59636	-26.5703
980	992	9	13.025	3	KERVPFVLTPDFL	4.19333	0.262439	8.69867	0.286084	12.8493	0.513866	12.9943	0.58111		4.99667	0.380865	11.8983	0.871129	19.8913	0.390075	47.3137	0.47762		18.708	1.05635	35.7843	0.662895	45.7417	0.808753	56.8747	1.0767					-0.803333	0.643304	-3.19967	1.15721	-7.042	0.903941	-34.3193	1.05873		-14.5147	1.31879	-27.0857	0.948979	-32.8923
993	1014	19	9.72	2	FVMGTSGKKTSPHFQKFQDICV	4.858	0.103262	6.47033	0.834976	8.42267	0.547848	12.0363	0.433633		5.694	0.310875	7.27033	0.571599	10.2083	0.0856524	17.5653	0.568459		13.4273	0.720948	21.426	1.05665	24.1717	1.07732	28.6357	0.658302					-0.836	0.414136	-0.8	1.40658	-1.78567	0.6335	-5.529	1.00209		-8.56933	0.824209	-14.9557	1.89163	-15.749
1017	1027	9	7.7825	2	YLALRHHTNLL	1.08667	0.291308	2.325	0.134577	5.87133	0.364198	10.8063	0.344645		1.46567	0.0902349	3.95933	0.297942	9.507	0.484554	14.58	0.209716		No viable peptide
1035	1050	13	11.11	2	LMTGMPQLTSKEDIEY	33.9307	0.161695	47.853	1.34421	61.7953	0.988061	66.2827	0.545078		35.8763	0.842108	53.2167	0.299882	64.509	0.403122	65.204	1.34773		40.9907	0.38473	55.5053	0.618605	63.722	0.503525	67.2053	0.881432					-1.94567	1.0038	-5.36367	1.64409	-2.71367	1.39118	1.07867	1.89281		-7.06	0.546425	-7.65233	1.96281	-1.92667
1050	1071	20	10.025	4	YIRDALTVGKNEEDAKKYFLDQ	10.581	0.0072111	11.3123	0.819425	13.3963	0.220073	20.5857	0.406997		12.3503	0.371651	22.2523	0.270859	39.456	0.294464	64.239	1.17148		30.4177	0.563578	46.7507	1.04092	58.0497	0.725971	65.166	0.815716					-1.76933	0.378862	-10.94	1.09028	-26.0597	0.514537	-43.6533	1.57848		-19.8367	0.570789	-35.4383	1.86034	-44.6533
1051	1071	19	9.545	3	IRDALTVGKNEEDAKKYFLDQ	12.7537	0.0197569	13.3397	0.379854	15.5643	0.392989	21.2617	0.261821		15.0473	0.784031	24.3077	0.777533	42.1313	0.465963	65.033	0.736684		35.2947	0.559861	50.4737	1.03683	59.575	0.864522	62.3777	0.638094					-2.29367	0.803788	-10.968	1.15739	-26.567	0.858952	-43.7713	0.998505		-22.541	0.579618	-37.134	1.41668	-44.0107
1051	1073	21	10.61	4	IRDALTVGKNEEDAKKYFLDQIE	10.3027	0.100917	11.2297	0.280365	13.3987	0.0295014	19.1457	0.590105		12.7297	0.901578	22.1447	0.716494	39.9553	0.431065	64.8383	0.582243		32.2183	0.698396	48.214	1.43148	61.4143	0.695921	65.657	1.06828					-2.427	1.0025	-10.915	0.996859	-26.5567	0.460567	-45.6927	1.17235		-21.9157	0.799313	-36.9843	1.71185	-48.0157
1072	1084	11	11.365	3	IEVCRDKGWTVQF	11.8503	0.100922	33.4457	1.11916	47.2167	0.48151	50.5283	0.736245		13.2213	0.214668	42.7527	0.616708	53.7803	0.805329	61.2597	0.857715		28.2297	0.495872	51.252	0.971911	57.6633	0.985762	59.7843	1.15949					-1.371	0.31559	-9.307	1.73586	-6.56367	1.28684	-10.7313	1.59396		-16.3793	0.596795	-17.8063	2.09107	-10.4467
1085	1092	6	14.425	2	NWFLHLVL	27.0993	0.553036	67.5303	0.836267	77.0793	0.926896	76.963	0.354969		24.4037	0.412282	70.9313	0.929932	75.0217	0.634335	77.2097	0.423142		13.023	1.03654	45.9913	0.492242	58.9653	0.935728	66.9243	1.13836					2.69567	0.965318	-3.401	1.7662	2.05767	1.56123	-0.246667	0.778111		14.0763	1.58957	21.539	1.32851	18.114
1088	1092	3	11.23	2	LHLVL	41.3413	0.857783	84.4367	0.716819	88.1253	0.49721	89.283	0.52904		38.8437	0.511983	83.7947	0.185014	85.8127	0.264886	86.3247	0.319719		12.689	0.312175	51.718	0.707303	64.4023	0.693456	76.041	0.0215174					2.49767	1.36977	0.642	0.901833	2.31267	0.762095	2.95833	0.848759		28.6523	1.16996	32.7187	1.42412	23.723
1091	1102	10	5.335	3	VLGIKQGEKHSA	50.1637	0.861571	49.728	0.811207	49.6147	1.46032	50.8397	1.13167		49.9677	0.263212	49.626	1.1972	49.395	0.669863	48.4167	1.07488		40.1823	0.436538	46.2933	1.14314	45.334	0.749819	47.8707	0.186033					0.196	1.12478	0.102	2.00841	0.219667	2.13018	2.423	2.20655		9.98133	1.29811	3.43467	1.95435	4.28067
1093	1102	8	3.58	1	GIKQGEKHSA	46.5663	0.167479	46.8383	1.13331	46.234	1.01499	48.209	1.26829		48.3963	1.60044	48.7637	0.82002	48.7143	0.588816	48.4283	1.38848		43.9953	0.404404	47.32	0.742614	47.8573	0.35109	48.484	0.237855					-1.83	1.76792	-1.92533	1.95333	-2.48033	1.6038	-0.219333	2.65677		2.571	0.571883	-0.481667	1.87592	-1.62333
						Average % deuterium incorporation																														% deuterium changes
p101						APO									R1021C									R1021P												APO vs R1021C									APO vs R1021P
S	E	Max D	RT	Z	Sequence	3s	SD	30s	SD	300s	SD	3000s	SD		3s	SD	30s	SD	300s	SD	3000s	SD		3s	SD	30s	SD	300s	SD	3000s	SD					3s	SD	30s	SD	300s	SD	3000s	SD		3s	SD	30s	SD	300s
11	26	14	12.09	4	DRIQHALERCLHGLSL	24.0013	1.00193	26.157	1.05424	34.602	0.895466	47.4613	0.23993		24.9477	0.576146	32.1627	1.27385	40.14	0.890384	47.543	0.385382		21.7207	0.0939273	28.075	0.968944	36.2523	0.866225	47.159	0.225785					-0.946333	1.57807	-6.00567	2.32809	-5.538	1.78585	-0.0816667	0.625311		2.28067	1.09585	-1.918	2.02318	-1.65033
27	36	8	5.945	3	SRRSTSWSAG	43.414	0.396372	43.7877	0.912224	44.773	0.485841	44.7183	0.4032		42.707	0.565058	43.6203	0.127516	43.781	0.168	43.6013	0.463484		42.3337	0.769024	43.4883	0.713048	44.357	0.797577	45.5197	0.596039					0.707	0.961431	0.167333	1.03974	0.992	0.653841	1.117	0.866684		1.08033	1.1654	0.299333	1.62527	0.416
42	47	4	13.325	1	WSLQEL	12.6003	0.529615	20.7257	1.771	46.459	0.795404	61.7187	0.778744		12.1767	0.215231	30.82	0.714901	51.9143	0.651246	61.281	0.354588		5.807	0.368261	24.7993	0.133287	44.417	0.832863	61.174	1.715					0.423667	0.744846	-10.0943	2.4859	-5.45533	1.44665	0.437667	1.13333		6.79333	0.897876	-4.07367	1.90428	2.042
48	55	5	6.185	2	VSRDPGHF	13.8107	0.550354	22.1163	0.70782	27.9693	0.611958	31.846	0.424527		14.1163	0.364289	23.444	0.610125	28.935	0.597297	33.3417	0.846231		12.1927	0.679393	22.879	0.672594	28.4453	0.273032	33.358	0.379704					-0.305667	0.914643	-1.32767	1.31794	-0.965667	1.20926	-1.49567	1.27076		1.618	1.22975	-0.762667	1.38041	-0.476
56	68	11	13.045	3	LILLEQILQKTRE	0.820667	0.425159	1.154	0.18851	3.81167	0.415404	13.5293	0.395183		0.465	0.21527	1.44033	0.113606	4.313	0.0536749	15.3323	0.382769		0.738333	0.21485	1.649	0.572128	5.19367	0.559801	15.3367	0.516243					0.355667	0.640429	-0.286333	0.302116	-0.501333	0.469079	-1.803	0.777952		0.0823333	0.640009	-0.495	0.760638	-1.382
59	68	8	7.095	3	LEQILQKTRE	1.207	0.0288444	1.436	0.0379868	5.13833	0.371678	16.836	0.0580775		1.27633	0.0323471	1.908	0.120237	5.50067	0.117798	18.2133	0.141599		1.70333	0.168939	2.38833	0.113068	6.801	0.304767	20.265	0.271015					-0.0693333	0.0611915	-0.472	0.158224	-0.362333	0.489476	-1.37733	0.199677		-0.496333	0.197783	-0.952333	0.151055	-1.66267
59	83	22	12.56	4	LEQILQKTREVQEKGTYDLLAPLAL	3.864	0.165448	11.5527	0.251544	19.748	0.141234	29.3263	0.364667		3.756	0.125108	12.7227	0.541466	19.9337	0.387962	30.0047	0.48714		5.82767	0.45303	14.4657	0.596875	21.1367	0.652596	30.9847	0.683613					0.108	0.290556	-1.17	0.79301	-0.185667	0.529196	-0.678333	0.851807		-1.96367	0.618478	-2.913	0.848419	-1.38867
69	78	8	10.605	1	VQEKGTYDLL	10.995	0.897403	23.6823	0.499552	37.1217	0.609215	41.437	1.09097		9.71667	0.311725	27.7303	0.237188	36.8757	0.152435	42.0493	1.55243		15.0037	0.426913	29.3967	0.706658	37.3707	0.879831	42.5703	0.893663					1.27833	1.20913	-4.048	0.736741	0.246	0.761649	-0.612333	2.6434		-4.00867	1.32432	-5.71433	1.20621	-0.249
69	83	12	13.6	2	VQEKGTYDLLAPLAL	6.84067	0.335746	14.6077	0.753365	21.8207	0.250464	27.7137	0.223205		6.41233	0.56383	15.9007	0.0697878	22.1677	0.236011	28.3483	0.405105		7.81233	0.673488	16.805	0.074505	22.1703	0.379289	28.6977	0.261405					0.428333	0.899576	-1.293	0.823152	-0.347	0.486476	-0.634667	0.62831		-0.971667	1.00923	-2.19733	0.82787	-0.349667
69	84	13	14.345	2	VQEKGTYDLLAPLALL	5.21633	0.273251	11.316	0.28579	17.2763	0.299027	23.0183	0.463174		5.30633	0.353794	13.4977	0.513926	18.3667	0.650333	24.6163	0.308237		5.93133	0.711957	13.4307	0.326469	18.7003	0.451722	24.5793	0.478525					-0.09	0.627046	-2.18167	0.799717	-1.09033	0.949361	-1.598	0.771412		-0.715	0.985208	-2.11467	0.61226	-1.424
84	90	5	13.125	1	LFYSTVL	1.164	0.310936	1.51167	0.486893	1.33567	0.521577	1.32433	0.285365		1.009	0.202813	1.55767	0.290531	1.301	0.320017	1.88	0.514638		1.04967	0.0840079	1.63133	0.374244	2.103	0.213197	2.483	0.42809					0.155	0.513748	-0.046	0.777424	0.0346667	0.841594	-0.555667	0.800003		0.114333	0.394944	-0.119667	0.861136	-0.767333
85	90	4	11.47	1	FYSTVL	2.32	1.00463	2.86367	0.967674	2.633	0.720086	3.34567	0.746502		1.85067	0.632936	2.284	1.05154	3.14467	0.671275	2.26333	0.156465		1.98067	1.3625	3.15733	0.0905778	3.50733	0.873175	2.54267	0.756664					0.469333	1.63757	0.579667	2.01922	-0.511667	1.39136	1.08233	0.902967		0.339333	2.36713	-0.293667	1.05825	-0.874333
91	101	6	9.93	2	CTPHFPPDSDL	14.5753	0.26725	25.7847	0.13299	32.3603	0.487691	34.718	0.0702353		14.5257	0.201336	27.9957	0.213854	32.2787	0.326319	34.7413	0.642733		15.1533	0.538433	27.5663	0.147096	31.939	0.356737	34.3847	0.408718					0.0496667	0.468586	-2.211	0.346844	0.0816667	0.81401	-0.0233333	0.712969		-0.578	0.805683	-1.78167	0.280086	0.421333
91	102	7	11.15	2	CTPHFPPDSDLL	12.117	0.401811	25.53	0.0745386	34.086	0.643527	36.4703	0.412883		11.592	0.450408	27.8927	0.135552	33.746	0.375601	35.8923	0.786537		12.1817	0.508561	27.4167	0.602756	33.5847	0.561485	35.73	0.983879					0.525	0.852218	-2.36267	0.210091	0.34	1.01913	0.578	1.19942		-0.0646667	0.910372	-1.88667	0.677294	0.501333
91	103	8	12.325	2	CTPHFPPDSDLLL	9.62133	0.170462	21.934	0.483563	29.3143	0.928097	35.2213	0.397896		9.71267	0.360402	23.6243	0.28509	28.9317	0.373605	34.6143	0.742464		9.624	0.150163	24.2513	0.467755	28.5313	0.715705	35.3677	1.34866					-0.0913333	0.530864	-1.69033	0.768653	0.382667	1.3017	0.607	1.14036		-0.00266667	0.320625	-2.31733	0.951317	0.783
102	122	17	11.925	4	LLKAARTYHRFLTWPVPYCSI	2.231	0.280797	5.04033	0.0393743	9.39433	0.555843	18.938	0.0506853		2.42467	0.327805	5.93233	0.21858	10.532	0.31674	19.4203	0.340764		7.587	0.776446	13.671	0.627309	20.0217	0.273654	26.735	0.3606					-0.193667	0.608602	-0.892	0.257955	-1.13767	0.872583	-0.482333	0.39145		-5.356	1.05724	-8.63067	0.666684	-10.6273
102	123	18	12.34	4	LLKAARTYHRFLTWPVPYCSIC	1.329	0.155897	4.29267	0.159303	8.57933	0.19263	17.2297	0.344102		1.572	0.0403361	4.86133	0.572096	9.34233	0.320225	17.1693	0.20578		4.599	0.118165	10.7303	0.425129	16.2183	0.33386	24.1833	0.484114					-0.243	0.196233	-0.568667	0.731399	-0.763	0.512855	0.0603333	0.549882		-3.27	0.274063	-6.43767	0.584431	-7.639
129	164	33	10.565	5	FIDAELKAPGISYQRLVRAEQGLSTRSHRSSTVTVL	3.43367	0.431528	3.25667	0.0975004	4.16	0.0530283	6.957	0.0975961		3.427	0.277022	3.85433	0.0535942	4.985	0.0985495	7.58467	0.174964		7.106	0.14117	5.44967	0.125484	6.264	0.557161	7.40067	0.269467					0.00666667	0.70855	-0.597667	0.151095	-0.825	0.151578	-0.627667	0.27256		-3.67233	0.572698	-2.193	0.222985	-2.104
134	144	8	8.985	3	LKAPGISYQRL	2.025	0.123236	1.814	0.479832	2.06233	0.225598	3.795	0.299782		1.828	0.19973	2.08867	0.280431	2.23767	0.19458	4.465	0.772081		3.59933	0.552905	3.25267	0.637122	4.03	0.706312	5.77867	0.650751					0.197	0.322965	-0.274667	0.760263	-0.175333	0.420178	-0.67	1.07186		-1.57433	0.676141	-1.43867	1.11695	-1.96767
145	162	16	4.635	4	VRAEQGLSTRSHRSSTVT	9.22333	0.0980017	9.81567	0.243445	10.968	0.298583	17.2393	0.456761		9.95933	0.483535	10.8253	0.446831	12.9267	0.513222	18.2437	0.570426		11.6373	0.574758	12.49	0.415198	14.028	1.07299	19.4317	0.481017					-0.736	0.581537	-1.00967	0.690276	-1.95867	0.811805	-1.00433	1.02719		-2.414	0.672759	-2.67433	0.658642	-3.06
145	164	18	6.815	4	VRAEQGLSTRSHRSSTVTVL	5.79567	0.164263	5.955	0.111718	7.393	0.211799	11.2537	0.168574		5.817	0.163414	6.949	0.200277	8.368	0.271277	12.8803	0.697166		7.51567	0.387164	8.49467	0.558973	10.1183	0.573587	14.7943	0.463455					-0.0213333	0.327677	-0.994	0.311996	-0.975	0.483076	-1.62667	0.86574		-1.72	0.551427	-2.53967	0.670691	-2.72533
165	172	5	9.48	1	LLNPVEVQ	24.841	0.384805	54.926	0.818719	60.524	0.708661	60.952	0.641785		23.6033	0.301666	56.0047	0.35512	59.527	0.645212	61.2003	0.552435		23.233	1.37444	54.4043	0.618126	58.8643	0.85154	61.0903	0.832862					1.23767	0.686471	-1.07867	1.17384	0.997	1.35387	-0.248333	1.19422		1.608	1.75924	0.521667	1.43684	1.65967
171	175	3	9.22	1	VQAEF	38.872	0.277022	45.962	0.415793	57.239	0.359405	59.3763	0.775508		38.517	0.335215	49.6237	0.609503	57.1397	0.293432	59.5957	0.834508		39.5753	0.782535	49.3947	0.808407	57.3763	0.464389	60.3317	0.536196					0.355	0.612237	-3.66167	1.0253	0.0993333	0.652837	-0.219333	1.61002		-0.703333	1.05956	-3.43267	1.2242	-0.137333
176	193	13	8.59	2	LDVADKLSTPGPSPHSAY	16.0427	1.38049	21.595	0.804151	33.14	0.438	46.1603	0.142497		16.368	0.559613	24.897	0.409498	35.0723	0.463651	45.6613	0.735214		18.1487	0.334321	25.1867	0.531836	33.12	0.766008	45.093	0.637391					-0.325333	1.94011	-3.302	1.21365	-1.93233	0.901651	0.499	0.877711		-2.106	1.71482	-3.59167	1.33599	0.02
177	193	12	7.82	3	DVADKLSTPGPSPHSAY	18.685	0.506806	25.5347	0.909308	37.5547	0.568439	49.24	0.458804		18.5997	0.313187	28.3147	0.170036	38.9773	0.326782	48.4663	0.789497		21.8877	0.643992	28.4463	0.633095	37.1613	0.819903	48.4663	0.684296					0.0853333	0.819993	-2.78	1.07934	-1.42267	0.89522	0.773667	1.2483		-3.20267	1.1508	-2.91167	1.5424	0.393333
197	209	11	10.545	3	LLHAFQATFGAHC	6.433	0.589821	7.32367	0.681019	8.77167	0.350862	10.083	0.175889		6.44633	0.184039	7.26967	0.324705	9.07	0.449941	10.1847	0.222019		6.65667	0.189716	7.452	0.390035	9.64633	0.493256	11.4707	1.0553					-0.0133333	0.77386	0.054	1.00572	-0.298333	0.800803	-0.101667	0.397908		-0.223667	0.779538	-0.128333	1.07105	-0.874667
197	211	13	11.775	3	LLHAFQATFGAHCDL	5.595	0.237293	7.944	0.308433	8.767	0.340635	9.82167	0.167727		5.192	0.230937	8.295	0.10922	9.106	0.462511	9.80967	0.361398		5.54633	0.160668	8.444	0.183959	9.43633	0.0943416	10.8213	0.676983					0.403	0.46823	-0.351	0.417653	-0.339	0.803145	0.012	0.529125		0.0486667	0.397961	-0.5	0.492392	-0.669333
215	226	10	6.835	4	HRRLQSKTLAEL	13.6057	0.159939	17.1097	0.545595	22.8293	0.393556	29.9903	0.12933		13.309	0.132503	17.9807	0.271752	22.8327	0.249819	30.9447	0.369733		12.0823	0.284678	17.7027	0.626395	22.5843	0.956722	31.108	0.538198					0.296667	0.292441	-0.871	0.817348	-0.00333333	0.643375	-0.954333	0.499063		1.52333	0.444616	-0.593	1.17199	0.245
215	228	12	7.16	2	HRRLQSKTLAELEA	12.2487	0.477921	14.665	0.731773	21.0127	0.712861	28.804	0.475593		11.777	0.138589	14.799	0.276349	19.8847	0.467102	28.9327	0.557467		10.2733	1.00167	14.6937	0.725911	18.7967	1.23344	29.524	0.933632					0.471667	0.61651	-0.134	1.00812	1.128	1.17996	-0.128667	1.03306		1.97533	1.47959	-0.0286667	1.45768	2.216
231	238	6	4.535	1	TETAEAQE	0.807	0.30108	1.00467	0.217946	0.935667	0.127786	2.233	0.717831		1.73667	0.743014	1.25633	1.05199	1.76933	0.395214	3.50967	0.16762		1.06933	0.702258	2.53233	0.363731	2.69633	0.958625	4.06067	1.18219					-0.929667	1.04409	-0.251667	1.26993	-0.833667	0.523001	-1.27667	0.88545		-0.262333	1.00334	-1.52767	0.581677	-1.76067
239	248	8	7.515	1	LASGIGDAAE	22.5303	0.23529	30.612	0.786598	41.9883	0.515232	48.0883	0.865703		22.277	0.469412	30.912	1.12205	41.7647	0.316255	48.8047	0.596512		22.6233	0.77581	32.519	0.782199	42.9227	0.9397	49.8113	0.914222					0.253333	0.704702	-0.3	1.90865	0.223667	0.831487	-0.716333	1.46222		-0.093	1.0111	-1.907	1.5688	-0.934333
239	257	17	11.17	3	LASGIGDAAEARQWLRTKL	8.65733	0.363811	13.825	1.05857	23.6087	0.654161	35.918	0.613002		8.31867	0.104577	14.3273	0.144659	22.7533	0.423095	35.138	0.534753		8.84467	0.316974	15.2417	0.342669	23.2107	0.302946	36.1453	0.961651					0.338667	0.468388	-0.502333	1.20323	0.855333	1.07726	0.78	1.14776		-0.187333	0.680785	-1.41667	1.40124	0.398
252	257	4	8.625	2	WLRTKL	1.189	0.290191	1.14167	0.34148	3.21767	0.411772	12.1543	0.307526		0.849667	0.627447	1.36533	0.270064	3.49967	0.112024	13.089	0.707403		1.42	0.467336	1.994	0.109672	4.15867	0.185635	14.5477	0.450628					0.339333	0.917638	-0.223667	0.611543	-0.282	0.523796	-0.934667	1.01493		-0.231	0.757527	-0.852333	0.451152	-0.941
271	288	13	8.295	2	DTAKPGKLRTIPIPVARC	27.7967	0.285598	40.1943	0.848016	44.757	0.590551	50.7747	0.12977		26.9753	0.224237	40.6787	0.25752	44.8673	0.436761	51.1923	0.901069		27.378	0.942577	41.4473	0.208159	44.5633	0.483417	50.9017	0.860173					0.821333	0.509835	-0.484333	1.10554	-0.110333	1.02731	-0.417667	1.03084		0.418667	1.22817	-1.253	1.05617	0.193667
289	298	8	12.375	1	YTYSWNQDSF	36.7973	0.146347	38.4843	1.15518	43.2957	0.302637	44.817	0.586194		36.7273	0.874741	39.4627	0.866479	42.8133	0.602694	45.7547	0.507072		35.3653	0.661309	38.755	0.531025	42.3567	0.784088	44.657	0.663936					0.07	1.02109	-0.978333	2.02166	0.482333	0.905332	-0.937667	1.09327		1.432	0.807655	-0.270667	1.6862	0.939
299	306	6	14.66	2	DILQEILL	4.92933	0.178029	18.1207	0.256699	38.651	0.737106	53.1303	0.677517		5.75333	1.03783	20.1207	1.06524	39.8153	0.561892	53.5923	0.603431		5.331	1.03031	19.9433	0.500046	38.39	0.899255	53.485	0.389195					-0.824	1.21586	-2	1.32194	-1.16433	1.299	-0.462	1.28095		-0.401667	1.20834	-1.82267	0.756745	0.261
304	317	11	12.555	2	ILLKEQELLQPEIL	39.889	0.596618	49.9013	0.97487	53.264	0.52043	53.6603	0.273745		38.857	0.842924	50.78	0.430739	52.5903	0.151962	53.686	0.458586		38.255	0.518507	50.0267	0.891433	51.6643	0.309371	53.5633	0.598077					1.032	1.43954	-0.878667	1.40561	0.673667	0.672391	-0.0256667	0.732331		1.634	1.11512	-0.125333	1.8663	1.59967
306	317	9	11.825	2	LKEQELLQPEIL	46.228	0.381747	54.7207	0.657876	54.8267	0.513064	55.4663	0.632641		44.5213	0.221868	54.5973	0.50685	53.9793	0.0777839	55.0693	0.351657		44.13	0.627	54.0333	0.625234	53.572	0.725019	54.834	0.657432					1.70667	0.603615	0.123333	1.16473	0.847333	0.590848	0.397	0.984297		2.098	1.00875	0.687333	1.28311	1.25467
311	317	4	12.005	1	LLQPEIL	57.109	0.814956	58.3693	0.875016	58.6027	0.392383	59.792	0.803594		55.7643	0.129516	58.7703	0.423502	58.651	0.531235	59.4463	0.512666		55.554	1.19596	58.465	0.253442	58.4637	0.602387	59.6417	0.414794					1.34467	0.944472	-0.401	1.29852	-0.0483333	0.923618	0.345667	1.31626		1.555	2.01092	-0.0956667	1.12846	0.139
333	345	11	7.825	2	DADGHCAERDSVL	29.9457	0.449335	29.9097	0.784962	30.239	0.307576	30.192	0.248622		29.8263	0.491732	30.2177	0.218416	29.5513	0.367484	30.5097	0.358534		29.829	0.441331	29.554	0.501927	30.1117	0.986624	30.904	0.638947					0.119333	0.941067	-0.308	1.00338	0.687667	0.67506	-0.317667	0.607156		0.116667	0.890666	0.355667	1.28689	0.127333
346	359	12	8.98	2	STGSAASHASTLSL	42.399	0.480563	41.1	0.429557	42.6067	0.0724523	42.808	0.335558		42.0717	0.325933	41.9613	0.24593	41.6267	0.344863	42.136	0.544187		41.3987	0.452947	41.1573	0.492616	41.0713	0.42935	42.3813	0.388322					0.327333	0.806496	-0.861333	0.675486	0.98	0.417315	0.672	0.879744		1.00033	0.933511	-0.0573333	0.922173	1.53533
346	377	29	11.935	3	STGSAASHASTLSLASSQASGPTLSRQLLTSF	41.445	0.123843	40.3523	1.27188	40.538	0.474867	41.0733	0.40044		41.3567	0.568748	40.8023	0.627326	40.1983	0.307191	40.8853	0.763781		40.7613	0.193676	39.9963	0.196225	39.6123	0.78791	40.347	0.853916					0.0883333	0.692591	-0.45	1.8992	0.339667	0.782058	0.188	1.16422		0.683667	0.317518	0.356	1.4681	0.925667
360	369	7	7.97	1	ASSQASGPTL	53.954	0.143962	54.18	1.04269	55.7157	0.920965	56.673	0.762126		53.7083	0.432678	54.2447	0.267062	54.769	0.343441	56.5223	0.517055		52.837	1.34035	53.1137	0.86191	54.8413	0.539559	55.3263	0.17897					0.245667	0.57664	-0.0646667	1.30975	0.946667	1.26441	0.150667	1.27918		1.117	1.48431	1.06633	1.9046	0.874333
360	377	15	12.155	2	ASSQASGPTLSRQLLTSF	48.4567	0.217973	47.0733	0.82983	47.4047	0.345031	47.7273	0.337909		47.8387	0.71637	46.975	0.609103	46.371	0.240025	47.235	0.443477		46.7823	0.58947	46.5377	0.298031	46.128	0.595272	47.1863	0.782198					0.618	0.934343	0.0983333	1.43893	1.03367	0.585056	0.492333	0.781386		1.67433	0.807443	0.535667	1.12786	1.27667
426	432	5	6.14	1	FKSTSQM	49.105	0.300135	49.0923	1.00132	50.204	0.754433	50.0187	0.0306159		48.734	0.123406	49.1333	0.82694	49.4113	0.207895	50.4163	0.964467		46.7383	0.94455	49.575	0.750153	49.1013	1.01562	51.0637	0.556931					0.371	0.423541	-0.041	1.82826	0.792667	0.962328	-0.397667	0.995083		2.36667	1.24468	-0.482667	1.75147	1.10267
433	457	20	7.195	4	VLRRDSRSLEGSPDSGPPLRRAGSL	39.125	0.686409	38.387	1.19196	38.6427	0.601744	38.7337	0.377232		38.5317	0.318506	38.644	0.24123	38.1553	0.529416	37.7127	0.401547		37.5273	1.23999	37.8097	0.755283	38.026	0.744655	39.0233	0.457578					0.593333	1.00492	-0.257	1.43319	0.487333	1.13116	1.021	0.77878		1.59767	1.9264	0.577333	1.94725	0.616667
435	457	18	6.865	5	RRDSRSLEGSPDSGPPLRRAGSL	41.6333	0.374643	40.2447	0.587294	41.0233	0.868853	40.891	0.565023		41.0207	0.46037	40.5517	0.587163	40.267	0.0963898	40.758	0.685096		40.619	0.840221	40.3537	0.68009	40.473	1.14064	40.834	0.601923					0.612667	0.835013	-0.307	1.17446	0.756333	0.965243	0.133	1.25012		1.01433	1.21486	-0.109	1.26738	0.550333
516	523	6	8.855	2	RVVVFGSD	13.5667	0.311786	13.661	0.271055	14.3367	0.59265	16.5673	0.173206		13.4947	0.299604	14.563	0.154561	16.2503	0.822208	19.782	0.578532		13.854	0.268777	15.3597	0.481831	16.2813	0.277939	19.9367	0.277471					0.072	0.611389	-0.902	0.425616	-1.91367	1.41486	-3.21467	0.751738		-0.287333	0.580563	-1.69867	0.752887	-1.94467
537	546	7	7.305	2	RRLENNRPLL	24.5917	0.22026	40.5357	1.29707	43.8927	0.235339	44.299	0.505083		23.4887	0.11518	40.807	0.423643	42.9517	0.28571	44.5187	0.768996		22.684	0.598822	40.062	0.596169	43.1347	0.314238	44.8283	0.310516					1.103	0.335439	-0.271333	1.72071	0.941	0.521049	-0.219667	1.27408		1.90767	0.819082	0.473667	1.89324	0.758
537	549	10	8.51	4	RRLENNRPLLTRF	20.3713	0.1657	39.8877	1.24408	43.4127	0.272709	44.9453	0.380789		19.55	0.304094	40.397	0.288376	42.7457	0.477764	44.7317	0.587764		19.028	0.709082	38.3937	1.10355	42.537	0.963464	44.6853	0.644436					0.821333	0.469793	-0.509333	1.53245	0.667	0.750473	0.213667	0.968553		1.34333	0.874781	1.494	2.34762	0.875667
550	554	3	11.83	1	FKLQF	7.61633	0.286804	21.965	0.649476	26.1607	0.615495	38.829	0.831722		6.33533	0.801668	23.3353	0.422931	28.7463	0.516804	41.3507	0.21795		6.215	0.371582	23.6523	0.551477	27.9987	0.694739	40.1193	0.209288					1.281	1.08847	-1.37033	1.07241	-2.58567	1.1323	-2.52167	1.04967		1.40133	0.658385	-1.68733	1.20095	-1.838
594	604	8	9.345	1	GAAPWEESTND	45.047	0.510471	43.3927	0.694177	44.8177	1.20657	45.0273	0.265219		44.4327	1.0877	44.5773	0.698505	43.9453	0.462212	43.5897	0.57426		43.6537	0.678471	43.8133	0.623086	44.458	0.689527	45.107	1.06872					0.614333	1.59817	-1.18467	1.39268	0.872333	1.66878	1.43767	0.839479		1.39333	1.18894	-0.420667	1.31726	0.359667
594	611	15	13.545	2	GAAPWEESTNDISHYLGM	30.217	0.170906	31.9927	0.899706	37.133	1.11959	43.3657	0.755252		30.7007	0.356391	34.5883	0.493863	38.5963	0.491269	46.0523	0.406		30.5233	0.486144	33.369	0.618476	36.9183	0.826459	44.3527	0.751698					-0.483667	0.527297	-2.59567	1.39357	-1.46333	1.61086	-2.68667	1.16125		-0.306333	0.657051	-1.37633	1.51818	0.214667
594	623	26	14.455	3	GAAPWEESTNDISHYLGMLDPWYERNVLGL	15.3683	0.798759	16.378	0.848532	23.0283	0.438464	39.6937	0.454911		16.0557	0.314948	22.169	0.674309	29.409	0.749933	43.6243	0.800516		15.0867	1.37661	21.2513	0.92339	27.011	0.958785	40.7743	0.706004					-0.687333	1.11371	-5.791	1.52284	-6.38067	1.1884	-3.93067	1.25543		0.281667	2.17537	-4.87333	1.77192	-3.98267
605	621	14	13.305	3	ISHYLGMLDPWYERNVL	8.34267	0.210039	9.26433	0.577291	14.22	0.439521	33.5607	0.0472476		12.1487	0.845376	15.2237	0.508551	22.085	0.355245	40.0383	0.187905		11.5167	0.628196	14.6823	0.663489	18.9727	0.209393	34.9267	0.174474					-3.806	1.05541	-5.95933	1.08584	-7.865	0.794766	-6.47767	0.235153		-3.174	0.838235	-5.418	1.24078	-4.75267
605	623	16	13.96	3	ISHYLGMLDPWYERNVLGL	8.95367	0.177162	8.945	0.266771	15.8537	0.181564	35.5343	0.233817		9.45533	0.314287	14.992	0.349394	23.255	0.388706	40.9333	0.208164		11.1253	0.396194	14.0567	0.386768	19.8867	0.292404	36.1997	0.547044					-0.501667	0.491449	-6.047	0.616165	-7.40133	0.570269	-5.399	0.441981		-2.17167	0.573355	-5.11167	0.653539	-4.033
612	623	9	13.455	2	LDPWYERNVLGL	9.73133	0.295813	10.9113	0.461093	19.4813	0.16202	38.01	0.122258		10.815	0.728758	17.8333	0.614093	27.9993	0.937721	47.5407	0.312433		12.6077	0.0578302	16.859	0.483768	23.7397	0.446773	40.6807	1.23156					-1.08367	1.02457	-6.922	1.07519	-8.518	1.09974	-9.53067	0.434691		-2.87633	0.353643	-5.94767	0.94486	-4.25833
622	631	6	11.87	2	GLMHLPPEVL	21.502	0.132921	34.5393	0.555145	41.7753	0.191719	46.6997	0.410484		20.8293	0.289638	36.1473	0.278583	41.9163	0.239959	46.564	0.190386		21.068	0.365016	35	0.775921	40.7657	0.898513	46.288	0.564019					0.672667	0.422559	-1.608	0.833728	-0.141	0.431678	0.135667	0.600871		0.434	0.497937	-0.460667	1.33107	1.00967
624	631	4	10.705	1	MHLPPEVL	31.7907	0.46373	50.1673	1.06212	58.186	0.812785	60.5397	0.594678		31.393	0.370036	51.154	0.256361	56.995	0.270701	59.495	1.02529		30.429	0.446608	49.7273	0.726913	56.67	1.14897	60.239	0.460691					0.397667	0.833766	-0.986667	1.31848	1.191	1.08349	1.04467	1.61997		1.36167	0.910338	0.44	1.78903	1.516
632	649	13	8.64	2	CQSLKAEPRPLEGSPAQL	53.2763	0.355576	53.7157	0.780054	54.5243	0.779353	55.6783	0.0856524		52.3267	0.312209	54.0397	0.459831	53.8247	0.194446	55.1813	0.660076		51.5723	0.95881	53.59	0.371945	53.6143	0.773174	55.1197	1.22198					0.949667	0.667785	-0.324	1.23988	0.699667	0.973799	0.497	0.745728		1.704	1.31439	0.125667	1.152	0.91
632	652	15	11.155	3	CQSLKAEPRPLEGSPAQLPIL	43.9497	0.218308	46.1153	0.680248	48.2233	0.739001	50.693	0.256299		43.3477	0.0270617	46.8787	0.458903	48.0537	0.3015	50.1413	0.605311		42.3747	0.428745	45.802	0.897955	47.104	1.15278	50.0097	0.747817					0.602	0.24537	-0.763333	1.13915	0.169667	1.0405	0.551667	0.86161		1.575	0.647053	0.313333	1.5782	1.11933
636	652	11	11.19	2	KAEPRPLEGSPAQLPIL	13.2003	0.289374	28.9343	0.862402	34.9157	0.89601	38.9513	0.52465		11.438	0.130092	28.7007	0.389422	33.3713	0.273873	39.007	0.365372		10.952	0.157839	29.5537	0.85204	34.2417	0.666731	40.415	0.509179					1.76233	0.419466	0.233667	1.25182	1.54433	1.16988	-0.0556667	0.890022		2.24833	0.447213	-0.619333	1.71444	0.674
657	662	4	11.4	2	LYYCRF	1.47567	0.0655922	1.68367	0.0536781	2.219	0.295264	3.24167	0.349082		1.84233	0.210139	2.77867	0.477998	8.14133	0.754142	9.57633	0.0821969		2.69233	0.481566	4.43567	0.231401	11.3373	0.463817	12.1	0.231877					-0.366667	0.275731	-1.095	0.531676	-5.92233	1.04941	-6.33467	0.431279		-1.21667	0.547158	-2.752	0.285079	-9.11833
663	668	3	7.39	1	AARPVL	8.536	0.491428	21.1517	0.668487	28.459	0.850113	33.1767	1.02452		8.946	0.310585	24.044	1.07146	30.2723	0.529572	39.211	1.02774		12.4007	0.99647	25.833	0.536467	32.899	0.74081	40.1293	0.140792					-0.41	0.802012	-2.89233	1.73995	-1.81333	1.37968	-6.03433	2.05226		-3.86467	1.4879	-4.68133	1.20495	-4.44
663	669	4	9.35	1	AARPVLL	6.97533	0.782643	16.2023	0.808655	21.7403	0.394432	25.8353	1.08463		6.61133	0.75438	20.438	3.65769	22.283	1.51538	31.2513	0.288613		9.676	0.388614	23.255	2.26552	27.8	4.91795	35.9957	2.78795					0.364	1.53702	-4.23567	4.46635	-0.542667	1.90982	-5.416	1.37324		-2.70067	1.17126	-7.05267	3.07417	-6.05967
669	676	6	10.805	1	LQVYQTEL	1.04167	0.558829	2.172	0.41062	3.976	0.269288	10.7133	1.29879		0.860667	0.370951	3.24933	0.409236	5.76533	0.507746	11.7653	1.39358		1.33067	0.494373	4.323	0.972076	8.45767	0.702047	13.9447	0.290641					0.181	0.92978	-1.07733	0.819857	-1.78933	0.777034	-1.052	2.69237		-0.289	1.0532	-2.151	1.3827	-4.48167
669	677	7	9.95	1	LQVYQTELT	1.12	0.323921	1.79267	0.322308	3.66533	0.274562	8.71233	0.474478		0.901667	0.131074	3.10367	0.555599	4.23433	0.490653	8.596	0.229654		1.32667	0.377606	3.12433	0.635076	4.80733	0.351944	11.5337	0.391377					0.218333	0.454995	-1.311	0.877907	-0.569	0.765215	0.116333	0.704132		-0.206667	0.701527	-1.33167	0.957384	-1.142
670	677	6	8.525	1	QVYQTELT	1.147	0.524655	1.28433	0.547928	1.67767	0.26401	3.78533	0.562036		0.772333	0.553666	2.76033	0.0861239	2.924	0.912081	4.98267	0.0345302		2.255	1.09911	3.82333	0.685036	4.743	0.190502	7.275	1.01301					0.374667	1.07832	-1.476	0.634052	-1.24633	1.17609	-1.19733	0.596566		-1.108	1.62377	-2.539	1.23296	-3.06533
672	677	4	7.785	1	YQTELT	1.099	0.473168	1.46067	0.382568	1.17567	0.508443	1.53867	0.230877		1.28433	0.36969	2.289	0.451618	1.35533	0.234628	1.541	0.399486		2.92233	0.109965	2.046	0.698607	2.25433	0.498921	2.51833	0.314382					-0.185333	0.842858	-0.828333	0.834186	-0.179667	0.743071	-0.00233333	0.630363		-1.82333	0.583133	-0.585333	1.08118	-1.07867
677	686	8	7.565	1	TFITGEKTTE	16.2677	0.177495	29.1017	0.981531	40.3857	0.450731	43.5657	0.188712		15.2577	0.146603	29.693	0.553873	39.3193	0.0852311	43.534	0.527233		15.656	0.59282	30.3987	0.917562	39.4967	0.858906	43.6573	0.329797					1.01	0.324097	-0.591333	1.5354	1.06633	0.535962	0.0316667	0.715946		0.611667	0.770315	-1.297	1.89909	0.889
677	688	10	11.475	2	TFITGEKTTEIF	10.607	0.0530283	17.7157	1.11764	24.5077	0.859875	28.2953	0.713084		10.3897	0.337198	17.9227	0.589011	24.1963	0.419495	28.06	0.198779		9.88433	0.119976	18.0747	0.140076	23.9437	0.614358	27.4303	0.503558					0.217333	0.390226	-0.207	1.70665	0.311333	1.27937	0.235333	0.911863		0.722667	0.173005	-0.359	1.25772	0.564
678	686	7	6.49	1	FITGEKTTE	18.543	0.685264	31.9373	1.29359	38.9923	0.433896	41.159	0.6378		17.1543	0.545967	31.6923	0.623984	36.9907	0.557771	41.2027	1.00017		17.1593	0.515114	32.012	0.669594	37.7727	1.59722	41.4863	0.280824					1.38867	1.23123	0.245	1.91757	2.00167	0.991666	-0.0436667	1.63797		1.38367	1.20038	-0.0746667	1.96318	1.21967
687	702	14	9.135	3	IFIHSLELGHSAATRA	16.5847	0.508734	16.467	0.43045	17.2927	0.176387	18.8957	0.377323		16.012	0.304531	16.3507	0.058046	17.5997	0.210396	18.9363	0.378598		16.847	0.657037	16.654	0.233232	17.957	0.385191	19.3943	0.733066					0.572667	0.813265	0.116333	0.488496	-0.307	0.386783	-0.0406667	0.75592		-0.262333	1.16577	-0.187	0.663681	-0.664333
687	726	36	9.94	5	IFIHSLELGHSAATRAIKASGPGSKRLGIDGDREAVPLTL	26.9603	0.144929	27.697	1.01162	28.819	0.53431	30.831	0.247586		26.4297	0.205456	28.2843	0.249127	28.38	0.347674	30.5993	0.406812		26.0417	0.448269	28.1953	0.143855	28.6473	0.440709	31.2687	0.398415					0.530667	0.350385	-0.587333	1.26075	0.439	0.881984	0.231667	0.654399		0.918667	0.593198	-0.498333	1.15548	0.171667
689	726	34	9	5	IHSLELGHSAATRAIKASGPGSKRLGIDGDREAVPLTL	30.1897	0.560319	31.1783	0.835382	32.1197	0.543673	34.0287	0.256028		29.4857	0.243336	31.461	0.160477	31.535	0.346717	33.8383	0.476047		29.1487	0.840794	31.3293	0.295838	31.9183	0.555041	34.6003	0.48992					0.704	0.803655	-0.282667	0.995859	0.584667	0.89039	0.190333	0.732075		1.041	1.40111	-0.151	1.13122	0.201333
692	726	31	9.08	4	LELGHSAATRAIKASGPGSKRLGIDGDREAVPLTL	31.2317	0.72499	32.312	0.846837	33.6093	0.50393	35.9073	0.482628		30.5867	0.395133	33.2093	0.293643	32.9147	0.454846	35.4663	1.02539		30.4217	0.899611	32.705	0.506719	33.2827	0.759662	36.0997	0.46674					0.645	1.12012	-0.897333	1.14048	0.694667	0.958776	0.441	1.50802		0.81	1.6246	-0.393	1.35356	0.326667
694	726	29	8.59	5	LGHSAATRAIKASGPGSKRLGIDGDREAVPLTL	32.036	0.62794	33.9887	1.07446	34.7703	0.517878	36.6997	0.250241		31.673	0.232308	34.2083	0.177117	34.1327	0.495817	36.483	0.732664		31.3457	0.520096	33.555	0.420186	34.1347	0.769564	36.9307	0.781245					0.363	0.860248	-0.219667	1.25158	0.637667	1.01369	0.216667	0.982904		0.690333	1.14804	0.433667	1.49465	0.635667
745	749	3	5.51	1	EKLCT	13.6803	0.289769	41.7513	1.23683	44.035	0.371641	49.967	1.26284		12.112	0.199482	42.781	0.325018	44.2717	0.499286	50.2113	0.840489		12.6053	0.780292	42.064	0.935911	45.6833	0.548847	51.528	0.56267					1.56833	0.489251	-1.02967	1.56185	-0.236667	0.870927	-0.244333	2.10333		1.075	1.07006	-0.312667	2.17274	-1.64833
750	763	12	8.29	2	SVNLSKACRQQEEL	37.6697	0.363397	40.6657	0.821743	42.1603	0.490023	45.1237	0.419488		37.4517	0.228106	41.1347	0.104006	41.5323	0.343008	45.0263	0.22212		37.25	0.613945	41.0343	0.443545	42.088	0.83714	46.1023	0.423569					0.218	0.591503	-0.469	0.92575	0.628	0.833031	0.0973333	0.641608		0.419667	0.977342	-0.368667	1.26529	0.0723333
750	769	18	8.235	3	SVNLSKACRQQEELDSSTEA	41.565	0.650537	44.414	0.870813	44.898	0.689026	46.5917	0.42466		40.8687	0.236654	44.1987	0.150879	44.5507	0.569605	46.6333	0.950296		40.3553	1.38757	43.9663	0.474112	44.958	0.525946	47.414	0.536793					0.696333	0.887192	0.215333	1.02169	0.347333	1.25863	-0.0416667	1.37496		1.20967	2.0381	0.447667	1.34493	-0.06
754	763	8	5.82	2	SKACRQQEEL	47.9377	0.508278	47.372	1.34683	48.3623	1.11815	48.1927	0.620502		47.5883	0.716868	47.5657	0.583617	48.0657	0.743667	48.6657	0.781038		46.629	0.581542	48.2023	0.870082	48.329	0.620433	49.7493	0.637233					0.349333	1.22515	-0.193667	1.93044	0.296667	1.86182	-0.473	1.40154		1.30867	1.08982	-0.830333	2.21691	0.0333333
768	774	5	12.045	1	EALTLNL	15.054	0.40994	25.256	1.03351	26.5737	0.163124	29.3033	0.367454		13.845	0.456767	25.7487	0.126619	26.38	0.188	30.0873	0.439436		13.48	0.232869	26.272	0.948179	27.094	0.540004	32.713	0.878975					1.209	0.866707	-0.492667	1.16013	0.193667	0.351124	-0.784	0.80689		1.574	0.642809	-1.016	1.98169	-0.520333
770	774	3	11.71	1	LTLNL	18.011	0.353361	23.9437	0.839756	24.272	0.22229	27.8673	0.328896		16.8217	0.527216	24.368	0.798284	24.789	0.648382	27.895	0.474886		16.2317	0.575606	25.2147	1.13395	25.473	0.419894	30.9243	0.810166					1.18933	0.880577	-0.424333	1.63804	-0.517	0.870672	-0.0276667	0.803782		1.77933	0.928967	-1.271	1.9737	-1.201
775	815	37	9.78	5	TEVVKRQTPKSKKGFNQISTSQIKVDKVQIIGSNSCPFAVC	14.623	0.11676	18.0487	0.89493	19.6287	0.411228	21.5327	0.139389		14.2073	0.0918822	18.4697	0.396788	19.2727	0.168684	21.506	0.492842		14.0963	0.298478	18.4773	0.340844	19.6133	0.382406	22.0513	0.176163					0.415667	0.208643	-0.421	1.29172	0.356	0.579912	0.0266667	0.632231		0.526667	0.415239	-0.428667	1.23577	0.0153333
777	796	17	4.845	4	VVKRQTPKSKKGFNQISTSQ	44.289	0.100539	43.5527	0.876347	43.863	0.931106	45.0037	0.589478		44.523	0.812609	43.7493	0.734716	44.135	0.398055	44.5803	1.1472		43.9007	0.820533	43.8833	1.06426	44.1883	0.563418	45.4683	0.763385					-0.234	0.913147	-0.196667	1.61106	-0.272	1.32916	0.423333	1.73668		0.388333	0.921072	-0.330667	1.94061	-0.325333
797	815	16	11.54	3	IKVDKVQIIGSNSCPFAVC	4.753	0.122503	5.91733	0.245732	6.25633	0.080829	9.65267	0.134753		4.72633	0.180306	6.186	0.0919348	6.321	0.0836242	9.88433	0.189964		4.81267	0.123622	6.00433	0.0837277	6.64233	0.183881	10.3083	0.292302					0.0266667	0.302809	-0.268667	0.337667	-0.0646667	0.164453	-0.231667	0.324717		-0.0596667	0.246125	-0.087	0.32946	-0.386
816	830	13	11.1	4	LDQDERKILQSVIRC	11.604	0.152699	25.6927	0.686692	31.2207	0.697565	35.5237	0.541786		10.1717	0.24116	25.8387	0.626739	30.3737	0.324864	35.503	0.356509		9.777	0.236381	25.828	0.848041	30.6117	0.766011	35.961	0.159462					1.43233	0.393859	-0.146	1.31343	0.847	1.02243	0.0206667	0.898296		1.827	0.38908	-0.135333	1.53473	0.609
817	830	12	10.505	3	DQDERKILQSVIRC	12.2273	0.298612	25.4937	0.70375	31.1047	1.01195	34.948	0.804966		10.7257	0.47692	25.8797	0.907601	30.1243	0.671483	35.0957	0.664423		10.5757	0.470341	25.6977	0.707832	30.0587	0.762404	35.9797	0.326656					1.50167	0.775532	-0.386	1.61135	0.980333	1.68344	-0.147667	1.46939		1.65167	0.768953	-0.204	1.41158	1.046
821	830	8	8.06	3	RKILQSVIRC	8.21467	0.621912	16.8653	0.436391	19.552	0.83278	26.0103	0.734207		7.32667	0.0954219	17.085	0.233814	19.7153	0.766554	25.688	1.25293		7.976	0.915458	17.1087	0.251367	20.8013	0.992171	27.06	1.11864					0.888	0.717334	-0.219667	0.670205	-0.163333	1.59933	0.322333	1.98714		0.238667	1.53737	-0.243333	0.687758	-1.24933
831	861	19	8.95	4	EVSPCYKPEKSSLCPPPQRPSYPPAPATPDL	42.1783	0.366667	42.5103	1.33155	44.418	1.02033	45.4517	0.381327		41.4387	0.189173	42.916	0.588516	44.045	0.535919	45.1353	0.724417		40.6233	1.06599	42.661	0.283194	43.667	1.13712	45.0633	0.814229					0.739667	0.555839	-0.405667	1.92007	0.373	1.55625	0.316333	1.10574		1.555	1.43266	-0.150667	1.61475	0.751
865	877	9	14.605	2	LCLPIMTFSGALP	7.96933	0.428789	11.5787	1.0191	16.7513	0.49194	25.7587	0.4892		11.788	0.274814	19.036	0.898381	23.711	0.898651	30.357	2.70081		13.963	0.713828	21.323	0.514114	23.6367	0.963288	31.5037	0.407829					-3.81867	0.703604	-7.45733	1.91749	-6.95967	1.39059	-4.59833	3.19001		-5.99367	1.14262	-9.74433	1.53322	-6.88533
868	877	7	12.975	2	PIMTFSGALP	12.3997	1.5834	17.23	1.0892	23.8983	0.201847	33.7613	0.445154		11.2023	0.358723	22.0417	0.284115	28.0357	0.538017	37.3703	0.67334		13.7857	0.37624	21.5547	0.468129	26.985	0.974006	35.427	0.642897					1.19733	1.94212	-4.81167	1.37331	-4.13733	0.739864	-3.609	1.11849		-1.386	1.95964	-4.32467	1.55732	-3.08667
872	877	3	9.64	1	FSGALP	19.611	0.341361	35.512	1.10978	47.0937	0.539175	53.1647	0.864065		20.0467	1.36831	39.4833	0.881239	48.009	0.343501	53.099	0.634064		21.7473	0.899698	39.0657	0.882703	47.4313	0.733158	53.5727	1.17894					-0.435667	1.70967	-3.97133	1.99102	-0.915333	0.882676	0.0656667	1.49813		-2.13633	1.24106	-3.55367	1.99249	-0.337667
[truncated: 5 more columns]

## Sheet: Figure 2_HDExaminer raw data
p110 peptides
							3s						3s						3s						30s						30s						30s						300s						300s
State	Start	End	Sequence	Search RT	Charge	Max D	Start RT	End RT	#D	%D	Score	Conf	Start RT	End RT	#D	%D	Score	Conf	Start RT	End RT	#D	%D	Score	Conf	Start RT	End RT	#D	%D	Score	Conf	Start RT	End RT	#D	%D	Score	Conf	Start RT	End RT	#D	%D	Score	Conf	Start RT	End RT	#D	%D	Score	Conf	Start RT
Apo	4	12	ENYKQPVVL	9.05	2	6	9.23	9.3	5.01	83.498	0.8289	Medium	9.23	9.31	4.988	83.138	0.8362	Medium	9.23	9.31	5.036	83.931	0.8336	Medium	9.23	9.31	5.064	84.408	0.834	Medium	9.23	9.31	5.026	83.77	0.8211	Medium	9.1	9.17	5.034	83.908	0.743	Medium	9.23	9.31	5.053	84.224	0.8184	Medium	9.23
Apo	13	32	REDNCRRRRRMKPRSAAASL	3.92	5	17	4.19	4.29	6.753	39.726	0.9492	High	4.19	4.3	6.809	40.053	0.9591	High	4.19	4.29	6.657	39.159	0.9542	High	4.19	4.29	7.214	42.435	0.9535	High	4.19	4.29	6.983	41.079	0.9551	High	4.19	4.29	6.817	40.098	0.9494	High	4.19	4.3	6.922	40.72	0.9456	High	4.19
Apo	35	41	MELIPIE	12.27	2	4	12.41	12.5	0.848	21.196	0.6668	Medium	12.41	12.51	0.807	20.168	0.7125	Medium	12.41	12.5	0.885	22.123	0.6843	Medium	12.26	12.33	1.001	25.035	0.4906	Medium	12.38	12.44	1.001	25.014	0.6591	Medium	12.42	12.51	0.962	24.04	0.7405	Medium	12.35	12.42	1.219	30.463	0.7219	Medium	12.41
Apo	36	41	ELIPIE	10.66	1	3	10.87	10.97	0.044	1.479	0.8062	Medium	10.87	10.97	0.043	1.424	0.8057	Medium	10.87	10.98	0.035	1.173	0.8027	Medium	10.88	10.98	0.055	1.839	0.8028	Medium	10.87	10.98	0.03	0.995	0.8136	Medium	10.87	10.97	0.048	1.605	0.8027	Medium	10.87	10.97	0.245	8.15	0.8116	Medium	10.93
Apo	38	58	IPIEFVLPTSQRKCKSPETAL	10.57	4	17	10.59	10.66	3.484	20.492	0.7065	Medium	10.57	10.66	3.468	20.401	0.6926	Medium	10.56	10.66	3.321	19.535	0.7075	Medium	10.57	10.66	4.714	27.73	0.7848	Medium	10.56	10.66	4.449	26.171	0.7436	Medium	10.56	10.66	4.341	25.536	0.7696	Medium	10.56	10.66	5.227	30.748	0.7717	Medium	10.56
Apo	42	58	FVLPTSQRKCKSPETAL	8.39	2	13	8.51	8.6	4.07	31.31	0.9447	High	8.51	8.6	3.957	30.435	0.9331	High	8.51	8.6	4.019	30.916	0.9387	High	8.6	8.68	5.323	40.944	0.8468	Medium	8.51	8.6	5.213	40.098	0.9333	High	8.52	8.61	5.143	39.561	0.9369	High	8.51	8.6	6.152	47.324	0.9373	High	8.51
Apo	42	59	FVLPTSQRKCKSPETALL	9.43	3	14	9.62	9.72	3.484	24.888	0.8783	Medium	9.62	9.72	3.408	24.341	0.8907	Medium	9.62	9.72	3.446	24.616	0.8885	Medium	9.7	9.78	4.774	34.099	0.8676	Medium	9.62	9.72	4.626	33.041	0.9071	Medium	9.52	9.6	4.681	33.438	0.8689	Medium	9.62	9.72	5.465	39.032	0.9104	Medium	9.62
Apo	59	70	LHVAGHGNVEQM	6.68	3	10	6.78	6.87	0.459	4.595	0.912	Medium	6.78	6.87	0.47	4.701	0.8936	Medium	6.78	6.87	0.461	4.611	0.9047	Medium	6.78	6.87	1.157	11.567	0.9239	Medium	6.78	6.87	1.126	11.263	0.893	Medium	6.79	6.88	1.11	11.099	0.9162	Medium	6.78	6.87	1.578	15.78	0.9104	Medium	6.78
Apo	59	72	LHVAGHGNVEQMKA	5.97	2	12	6.11	6.2	0.375	3.122	0.8653	Medium	6.11	6.2	0.305	2.544	0.8575	Medium	6.11	6.2	0.426	3.551	0.857	Medium	6.11	6.2	0.935	7.793	0.8836	Medium	6.11	6.2	1.002	8.346	0.8684	Medium	6.11	6.2	1.041	8.679	0.8943	Medium	6.11	6.2	1.414	11.781	0.8944	Medium	6.11
Apo	60	75	HVAGHGNVEQMKAQVW	8.28	3	14	8.41	8.5	0.234	1.669	0.9342	High	8.41	8.5	0.231	1.652	0.9363	High	8.41	8.5	0.21	1.499	0.9331	High	8.41	8.5	0.593	4.238	0.9356	High	8.41	8.5	0.574	4.098	0.9377	High	8.41	8.51	0.54	3.86	0.9357	High	8.41	8.5	0.896	6.398	0.9363	High	8.41
Apo	79	84	LETSVA	6.26	1	4	6.48	6.57	2.236	55.902	0.9176	Medium	6.48	6.57	2.208	55.202	0.9253	Medium	6.48	6.57	2.3	57.5	0.9169	Medium	6.48	6.57	3.112	77.796	0.9228	Medium	6.48	6.57	3.167	79.163	0.9139	Medium	6.39	6.46	3.149	78.726	0.8998	Medium	6.48	6.57	3.415	85.369	0.9224	Medium	6.48
Apo	79	86	LETSVAAD	6.15	1	6	6.37	6.47	3.397	56.623	0.9387	High	6.37	6.47	3.368	56.138	0.9357	High	6.37	6.47	3.441	57.343	0.9362	High	6.37	6.47	4.392	73.193	0.9288	High	6.37	6.47	4.408	73.469	0.9229	High	6.28	6.35	4.369	72.811	0.9311	High	6.37	6.47	4.714	78.566	0.9249	High	6.37
Apo	85	99	ADFYHRLGPHHFLLL	11.31	4	12	11.44	11.52	0.566	4.714	0.784	Medium	11.45	11.53	0.51	4.254	0.7671	Medium	11.45	11.52	0.502	4.185	0.8028	Medium	11.45	11.52	1.434	11.952	0.8157	Medium	11.44	11.52	1.386	11.55	0.7755	Medium	11.44	11.52	1.355	11.29	0.7719	Medium	11.45	11.53	1.822	15.183	0.7706	Medium	11.44
Apo	87	99	FYHRLGPHHFLLL	10.45	2	10	10.5	10.58	0.32	3.202	0.9227	Medium	10.51	10.58	0.332	3.324	0.9132	Medium	10.51	10.58	0.317	3.172	0.9234	Medium	10.51	10.58	0.65	6.504	0.9054	Medium	10.51	10.58	0.575	5.75	0.9077	Medium	10.5	10.58	0.568	5.678	0.9101	Medium	10.51	10.58	0.737	7.366	0.9065	Medium	10.5
Apo	88	98	YHRLGPHHFLL	8.5	3	8	8.59	8.67	0.411	5.133	0.8138	Medium	8.59	8.67	0.474	5.92	0.786	Medium	8.59	8.67	0.474	5.929	0.8164	Medium	8.59	8.67	0.91	11.373	0.8631	Medium	8.59	8.67	0.783	9.788	0.8412	Medium	8.6	8.67	0.792	9.899	0.878	Medium	8.53	8.61	0.983	12.282	0.84	Medium	8.64
Apo	100	106	YQKKGQW	6.04	2	5	6.26	6.33	1.726	34.511	0.9378	High	6.26	6.34	1.721	34.411	0.9306	High	6.26	6.33	1.743	34.869	0.9272	High	6.2	6.28	2.845	56.91	0.9368	High	6.26	6.33	2.782	55.638	0.928	High	6.15	6.22	2.758	55.166	0.9137	High	6.2	6.28	2.996	59.913	0.9198	High	6.26
Apo	107	118	YEIYDKYQVVQT	9.59	2	10	9.53	9.61	0.973	9.731	0.798	Medium	9.53	9.61	0.976	9.761	0.8275	Medium	9.53	9.61	0.995	9.953	0.8182	Medium	9.53	9.61	2.005	20.046	0.8307	Medium	9.53	9.61	1.949	19.492	0.7908	Medium	9.53	9.61	1.901	19.014	0.8175	Medium	9.53	9.61	3.061	30.612	0.8141	Medium	9.53
Apo	114	121	QVVQTLDC	8.83	1	6	9.02	9.1	0.995	16.583	0.8894	Medium	9.02	9.1	1.007	16.776	0.8879	Medium	9.02	9.1	1.032	17.201	0.8873	Medium	9.02	9.1	1.394	23.229	0.8795	Medium	9.02	9.1	1.42	23.666	0.8784	Medium	9.03	9.1	1.327	22.122	0.8852	Medium	9.02	9.1	1.455	24.245	0.8902	Medium	9.02
Apo	122	137	LRYWKATHRSPGQIHL	7.53	4	13	7.71	7.79	0.465	3.578	0.9104	Medium	7.71	7.79	0.376	2.894	0.9079	High	7.71	7.79	0.43	3.308	0.897	High	7.71	7.79	1.421	10.931	0.9195	High	7.71	7.79	1.293	9.946	0.9087	Medium	7.72	7.79	1.333	10.251	0.9159	High	7.71	7.79	2.252	17.322	0.9138	High	7.71
Apo	122	149	LRYWKATHRSPGQIHLVQRHPPSEESQA	6.41	5	23	6.6	6.68	2.166	9.417	0.9527	High	6.6	6.68	2.059	8.953	0.9504	High	6.6	6.68	2.114	9.192	0.9451	High	6.6	6.68	4.334	18.843	0.9474	High	6.6	6.68	3.952	17.184	0.9457	High	6.6	6.69	4.075	17.716	0.943	High	6.6	6.68	5.752	25.007	0.943	High	6.6
Apo	122	157	LRYWKATHRSPGQIHLVQRHPPSEESQAFQRQLTAL	8.72	5	31	8.73	8.8	1.92	6.193	0.9298	High	8.73	8.8	1.8	5.805	0.9106	High	8.73	8.8	1.784	5.755	0.9291	High	8.73	8.8	4.433	14.3	0.9251	High	8.73	8.8	4.138	13.347	0.9199	High	8.73	8.81	4.179	13.481	0.9261	High	8.73	8.8	6.486	20.922	0.9239	High	8.73
Apo	125	157	WKATHRSPGQIHLVQRHPPSEESQAFQRQLTAL	8.68	5	28	8.73	8.81	1.829	6.532	0.8566	Medium	8.74	8.81	1.881	6.717	0.7998	Medium	8.74	8.81	1.757	6.274	0.8417	Medium	8.74	8.81	4.321	15.434	0.8302	Medium	8.73	8.81	4.1	14.643	0.8232	Medium	8.74	8.82	4.105	14.661	0.8131	Medium	8.74	8.81	6.105	21.804	0.8234	Medium	8.74
Apo	138	157	VQRHPPSEESQAFQRQLTAL	9.74	4	16	9.92	9.98	1.718	10.735	0.863	Medium	9.92	9.99	1.668	10.424	0.8563	Medium	9.92	9.99	1.643	10.268	0.8634	Medium	9.92	9.99	3.495	21.842	0.8496	Medium	9.92	9.98	3.367	21.042	0.8456	Medium	9.92	9.98	3.253	20.333	0.8432	Medium	9.92	9.99	4.919	30.742	0.8324	Medium	9.92
Apo	150	157	FQRQLTAL	9.15	2	6	9.32	9.39	0.103	1.717	0.893	Medium	9.32	9.39	0.102	1.694	0.8963	Medium	9.32	9.39	0.084	1.398	0.8918	Medium	9.32	9.39	0.367	6.109	0.9045	Medium	9.32	9.39	0.353	5.876	0.9006	Medium	9.33	9.39	0.358	5.959	0.9067	Medium	9.32	9.39	1.092	18.192	0.8872	Medium	9.32
Apo	151	157	QRQLTAL	8.12	2	5	8.31	8.39	0.102	2.041	0.9354	High	8.32	8.39	0.09	1.81	0.9407	High	8.32	8.39	0.112	2.237	0.9327	High	8.32	8.39	0.403	8.069	0.9075	High	8.32	8.39	0.329	6.586	0.951	High	8.32	8.4	0.33	6.599	0.9337	Medium	8.32	8.39	1.002	20.03	0.9214	Medium	8.32
Apo	158	164	IGYDVTD	8.23	1	5	8.43	8.51	0.61	12.199	0.9376	High	8.43	8.51	0.617	12.335	0.9406	High	8.43	8.51	0.599	11.989	0.9371	High	8.43	8.51	1.182	23.643	0.9247	High	8.43	8.51	1.124	22.48	0.9177	High	8.44	8.52	1.111	22.221	0.9215	High	8.43	8.51	2.326	46.529	0.9067	High	8.43
Apo	158	173	IGYDVTDVSNVHDDEL	10.34	2	14	10.54	10.61	3.271	23.367	0.8958	Medium	10.54	10.62	3.194	22.812	0.8816	Medium	10.54	10.61	3.194	22.817	0.8886	Medium	10.54	10.62	4.946	35.327	0.8715	Medium	10.54	10.61	4.635	33.11	0.8661	Medium	10.54	10.61	4.61	32.93	0.8722	Medium	10.54	10.61	6.27	44.784	0.8573	Medium	10.54
Apo	158	174	IGYDVTDVSNVHDDELE	9.9	2	15	10.08	10.14	3.298	21.984	0.9177	Medium	10.08	10.15	3.234	21.557	0.9288	Medium	10.08	10.14	3.255	21.699	0.9253	Medium	10.08	10.15	4.802	32.016	0.9035	Medium	10.08	10.14	4.672	31.15	0.9259	Medium	10.08	10.14	4.662	31.082	0.9273	Medium	10.08	10.14	6.48	43.199	0.9081	Medium	10.08
Apo	165	175	VSNVHDDELEF	10.56	2	9	10.69	10.76	1.244	13.82	0.7741	Medium	10.69	10.77	1.247	13.859	0.7883	Medium	10.69	10.77	1.18	13.114	0.7884	Medium	10.69	10.77	2.361	26.233	0.7882	Medium	10.69	10.77	2.206	24.516	0.7708	Medium	10.69	10.76	2.231	24.793	0.7932	Medium	10.69	10.77	2.765	30.721	0.7973	Medium	10.69
Apo	174	182	EFTRRGLVT	7	2	7	7.34	7.42	0.061	0.872	0.9278	Medium	7.34	7.42	0.103	1.47	0.9255	Medium	7.34	7.42	0.103	1.472	0.9283	Medium	7.34	7.42	0.173	2.471	0.9252	Medium	7.34	7.42	0.175	2.502	0.9439	High	7.35	7.42	0.211	3.015	0.8861	Medium	7.34	7.42	0.551	7.871	0.9236	High	7.34
Apo	174	195	EFTRRGLVTPRMAEVASRDPKL	8.28	5	18	8.31	8.4	1.139	6.327	0.9111	High	8.32	8.4	1.087	6.04	0.9077	Medium	8.32	8.4	1.102	6.124	0.9169	High	8.32	8.4	2.019	11.217	0.9331	High	8.32	8.4	1.939	10.772	0.9287	High	8.32	8.41	1.949	10.829	0.9364	High	8.32	8.4	3.668	20.376	0.9325	High	8.32
Apo	175	182	FTRRGLVT	6.2	2	6	6.36	6.43	0.075	1.254	0.9058	Medium	6.36	6.44	0.074	1.226	0.9186	Medium	6.36	6.44	0.09	1.494	0.888	Medium	6.36	6.44	0.171	2.855	0.9415	Medium	6.36	6.43	0.207	3.443	0.8994	Medium	6.37	6.44	0.184	3.059	0.9334	Medium	6.36	6.44	0.592	9.87	0.9132	Medium	6.36
Apo	175	187	FTRRGLVTPRMAE	7.17	3	10	7.27	7.34	0.17	1.704	0.8119	Medium	7.27	7.34	0.201	2.013	0.7807	Medium	7.27	7.34	0.141	1.409	0.8122	Medium	7.27	7.34	0.298	2.976	0.8399	Medium	7.27	7.34	0.338	3.382	0.7556	Medium	7.27	7.35	0.304	3.042	0.8204	Medium	7.27	7.34	1.1	11.002	0.82	Medium	7.27
Apo	183	195	PRMAEVASRDPKL	6.78	3	10	7.07	7.15	1.044	10.438	0.9022	High	7.08	7.15	1.146	11.461	0.8989	High	7.07	7.15	1.16	11.602	0.9036	High	7.07	7.15	1.906	19.055	0.9081	High	7.07	7.15	1.889	18.892	0.9047	Medium	7.08	7.16	1.828	18.275	0.8759	High	7.07	7.15	3.173	31.732	0.8756	High	7.07
Apo	186	195	AEVASRDPKL	5.99	2	7	6.35	6.43	1.088	15.541	0.9466	High	6.35	6.43	1.052	15.025	0.9537	High	6.35	6.43	1.078	15.405	0.9464	High	6.35	6.43	1.833	26.181	0.9299	Medium	6.35	6.43	1.778	25.397	0.9459	High	6.36	6.43	1.768	25.262	0.9288	Medium	6.35	6.43	2.893	41.334	0.9357	Medium	6.35
Apo	188	195	VASRDPKL	5.31	2	5	5.61	5.68	1.097	21.947	0.9016	Medium	5.61	5.68	1.115	22.31	0.9048	Medium	5.61	5.68	1.099	21.972	0.9165	Medium	5.61	5.68	1.715	34.294	0.9315	Medium	5.61	5.68	1.672	33.449	0.9257	Medium	5.61	5.68	1.671	33.425	0.9252	Medium	5.53	5.6	2.356	47.12	0.8174	Medium	5.64
Apo	196	211	YAMHPWVTSKPLPEYL	11.83	3	11	11.97	12.06	3.004	27.308	0.8904	High	11.98	12.06	2.996	27.235	0.8972	High	11.97	12.06	2.952	26.835	0.8937	High	11.98	12.06	4.255	38.686	0.9009	High	11.97	12.06	4.158	37.802	0.8952	High	11.98	12.06	4.042	36.745	0.8951	High	11.98	12.06	5.483	49.845	0.9006	High	11.97
Apo	212	221	WKKIANNCIF	10.5	1	8	10.64	10.71	1.844	23.054	0.9045	Medium	10.64	10.72	1.903	23.792	0.8861	Medium	10.64	10.72	1.843	23.044	0.8808	Medium	10.73	10.79	3.166	39.574	0.849	Medium	10.64	10.71	3.128	39.098	0.877	Medium	10.64	10.71	3.054	38.171	0.8757	Medium	10.64	10.72	4.486	56.076	0.8585	Medium	10.64
Apo	222	232	IVIHRSTTSQT	4.69	2	9	4.83	4.91	2.963	32.922	0.9146	Medium	4.83	4.91	2.894	32.154	0.9403	Medium	4.83	4.91	2.865	31.831	0.9364	Medium	4.83	4.91	2.965	32.941	0.9376	Medium	4.83	4.91	3.067	34.075	0.9272	Medium	4.83	4.91	2.943	32.702	0.9423	Medium	4.83	4.91	3.274	36.374	0.9501	Medium	4.83
Apo	222	245	IVIHRSTTSQTIKVSPDDTPGAIL	9.09	4	20	9.27	9.35	2.292	11.46	0.9058	High	9.27	9.35	2.27	11.348	0.9132	High	9.27	9.35	2.252	11.259	0.9123	High	9.27	9.35	3.419	17.095	0.9081	High	9.27	9.35	3.116	15.578	0.9148	High	9.27	9.35	3.121	15.606	0.9122	High	9.27	9.35	4.259	21.297	0.9081	High	9.27
Apo	233	245	IKVSPDDTPGAIL	9.96	2	9	10.18	10.25	0.831	9.235	0.9038	Medium	10.18	10.26	0.791	8.791	0.912	Medium	10.18	10.25	0.837	9.304	0.9104	Medium	10.18	10.26	1.205	13.387	0.9061	Medium	10.18	10.25	1.094	12.152	0.9143	Medium	10.18	10.25	1.096	12.181	0.9002	Medium	10.18	10.25	1.878	20.863	0.9003	Medium	10.18
Apo	249	269	FTKMAKKKSLMDIPESQSEQD	7.32	2	18	7.53	7.6	9.444	52.466	0.9223	High	7.53	7.6	9.138	50.766	0.9211	High	7.53	7.6	9.323	51.796	0.9253	High	7.59	7.65	9.84	54.666	0.9085	High	7.56	7.64	9.63	53.498	0.9229	High	7.53	7.61	9.465	52.584	0.921	High	7.61	7.68	9.906	55.036	0.8685	Medium	7.53
Apo	270	280	FVLRVCGRDEY	9.76	3	9	9.87	9.93	0.313	3.483	0.8329	Medium	9.87	9.94	0.229	2.539	0.8579	Medium	9.87	9.93	0.197	2.188	0.8692	Medium	9.87	9.94	0.289	3.212	0.8568	Medium	9.87	9.93	0.372	4.128	0.8138	Medium	9.87	9.93	0.382	4.25	0.8479	Medium	9.87	9.93	0.649	7.206	0.8064	Medium	9.87
Apo	270	281	FVLRVCGRDEYL	11.19	3	10	11.28	11.37	0.141	1.405	0.9179	High	11.29	11.38	0.146	1.456	0.9262	High	11.29	11.37	0.132	1.319	0.9234	High	11.29	11.37	0.244	2.444	0.9323	High	11.29	11.37	0.232	2.317	0.9245	High	11.28	11.37	0.235	2.354	0.9233	High	11.29	11.38	0.662	6.622	0.9259	High	11.29
Apo	282	291	VGETPIKNFQ	8.12	2	7	8.23	8.31	0.604	8.623	0.8813	Medium	8.23	8.31	0.574	8.205	0.8879	High	8.23	8.31	0.59	8.435	0.8865	Medium	8.23	8.31	0.583	8.332	0.912	High	8.23	8.31	0.575	8.215	0.8902	High	8.24	8.31	0.549	7.847	0.9024	High	8.23	8.31	0.69	9.856	0.9024	High	8.23
Apo	282	307	VGETPIKNFQWVRHCLKNGEEIHVVL	11.35	4	23	11.36	11.43	1.048	4.558	0.9064	High	11.37	11.43	1.06	4.609	0.9132	High	11.36	11.43	1.016	4.419	0.9152	High	11.36	11.43	3.61	15.695	0.9075	High	11.36	11.43	3.436	14.938	0.9158	High	11.36	11.43	3.331	14.482	0.9201	High	11.37	11.43	4.219	18.344	0.9174	High	11.36
Apo	292	307	WVRHCLKNGEEIHVVL	8.82	4	14	8.92	8.99	0.724	5.169	0.8715	Medium	8.92	9	0.653	4.663	0.8999	High	8.92	9	0.643	4.59	0.8982	High	8.92	9	2.579	18.42	0.8986	Medium	8.92	9	2.39	17.073	0.8814	Medium	8.93	9	2.468	17.63	0.9024	Medium	8.92	9	3.013	21.519	0.888	Medium	8.92
Apo	303	315	IHVVLDTPPDPAL	10.29	2	8	10.6	10.67	0.619	7.738	0.7173	Medium	10.6	10.67	0.647	8.082	0.7365	Medium	10.6	10.67	0.965	12.057	0.7253	Medium	10.6	10.67	1.746	21.821	0.7298	Medium	10.6	10.67	1.698	21.223	0.7416	Medium	10.6	10.67	1.642	20.527	0.7387	Medium	10.6	10.67	2.27	28.374	0.7585	Medium	10.6
Apo	308	315	DTPPDPAL	8.44	1	3	8.66	8.74	0.528	17.602	0.9021	Medium	8.66	8.75	0.482	16.07	0.9138	Medium	8.66	8.74	0.525	17.507	0.9015	Medium	8.66	8.74	1.141	38.031	0.8839	Medium	8.66	8.74	1.136	37.865	0.8912	Medium	8.67	8.75	1.128	37.616	0.8945	Medium	8.66	8.74	1.569	52.296	0.8853	Medium	8.66
Apo	316	335	DEVRKEEWPLVDDCTGVTGY	12.57	3	17	12.65	12.73	6.197	36.452	0.8485	Medium	12.66	12.73	6.165	36.266	0.8719	Medium	12.65	12.73	6.083	35.783	0.8538	Medium	12.65	12.73	7.44	43.767	0.8256	Medium	12.65	12.73	7.338	43.163	0.8397	Medium	12.66	12.74	7.015	41.265	0.846	Medium	12.66	12.73	8.069	47.467	0.8277	Medium	12.65
Apo	316	339	DEVRKEEWPLVDDCTGVTGYHEQL	11.93	4	21	11.98	12.06	6.7	31.907	0.8174	Medium	11.98	12.06	6.66	31.714	0.8493	Medium	11.98	12.06	6.708	31.944	0.8444	Medium	11.98	12.06	8.405	40.025	0.8222	Medium	11.98	12.06	8.304	39.544	0.8175	Medium	12.01	12.09	8.467	40.321	0.8018	Medium	11.99	12.06	9.726	46.313	0.8267	Medium	11.98
Apo	316	350	DEVRKEEWPLVDDCTGVTGYHEQLTIHGKDHESVF	11.04	5	32	11.28	11.35	6.548	20.463	0.9054	High	11.28	11.36	6.313	19.727	0.9159	High	11.28	11.35	6.344	19.825	0.9078	High	11.36	11.44	8.701	27.192	0.8099	Medium	11.28	11.35	8.55	26.717	0.8996	High	11.28	11.35	8.563	26.76	0.9047	High	11.28	11.36	11.147	34.833	0.8987	High	11.28
Apo	340	350	TIHGKDHESVF	6.78	2	9	7.01	7.08	1.17	13.005	0.8919	Medium	7.01	7.08	1.214	13.485	0.8961	Medium	7.01	7.08	1.222	13.58	0.8963	Medium	7.01	7.08	1.997	22.188	0.8888	Medium	7.01	7.08	2.003	22.257	0.8925	Medium	7.01	7.09	1.91	21.221	0.8791	Medium	7.01	7.08	2.31	25.665	0.882	Medium	7.01
Apo	355	369	WDCDRKFRVKIRGID	8.99	4	13	8.99	9.05	0.255	1.959	0.7856	Medium	8.99	9.06	0.278	2.135	0.8137	Medium	8.99	9.05	0.21	1.615	0.8123	Medium	8.99	9.06	0.746	5.742	0.79	Medium	8.99	9.05	0.654	5.028	0.7905	Medium	8.99	9.06	0.697	5.358	0.8008	Medium	8.99	9.05	0.938	7.218	0.7898	Medium	8.99
Apo	355	379	WDCDRKFRVKIRGIDIPVLPRNTDL	10.5	4	21	10.46	10.55	2.911	13.863	0.8371	Medium	10.47	10.55	2.823	13.441	0.841	Medium	10.46	10.55	2.784	13.257	0.8434	Medium	10.46	10.55	3.957	18.844	0.8926	High	10.46	10.55	3.865	18.407	0.8614	Medium	10.46	10.55	3.794	18.066	0.8722	Medium	10.46	10.55	4.576	21.791	0.8778	Medium	10.46
Apo	355	381	WDCDRKFRVKIRGIDIPVLPRNTDLTV	10.77	4	23	10.81	10.88	2.885	12.542	0.7431	Medium	10.81	10.88	2.901	12.614	0.7612	Medium	10.81	10.88	2.897	12.597	0.7648	Medium	10.81	10.88	4.421	19.221	0.8025	Medium	10.81	10.88	4.289	18.648	0.7811	Medium	10.81	10.88	4.223	18.362	0.804	Medium	10.81	10.88	5.539	24.085	0.7933	Medium	10.81
Apo	370	381	IPVLPRNTDLTV	10.11	2	9	10.22	10.29	3.602	40.023	0.8799	Medium	10.22	10.3	3.634	40.382	0.8857	Medium	10.22	10.3	3.58	39.778	0.8911	Medium	10.29	10.36	4.769	52.992	0.8991	Medium	10.22	10.3	4.665	51.839	0.9	Medium	10.22	10.29	4.603	51.147	0.9022	Medium	10.22	10.3	5.624	62.485	0.897	Medium	10.22
Apo	382	394	FVEANIQHGQQVL	9.2	2	11	9.34	9.45	1.352	12.292	0.9369	High	9.34	9.45	1.357	12.333	0.9176	Medium	9.34	9.45	1.327	12.061	0.9232	High	9.34	9.45	2.113	19.207	0.9196	Medium	9.34	9.45	2.007	18.247	0.9304	High	9.35	9.45	1.985	18.048	0.916	Medium	9.34	9.45	2.323	21.115	0.9155	Medium	9.34
Apo	383	394	VEANIQHGQQVL	7.96	2	10	8.19	8.27	1.359	13.594	0.937	High	8.19	8.28	1.37	13.699	0.9351	High	8.19	8.27	1.341	13.409	0.9389	High	8.19	8.27	2.086	20.856	0.9448	High	8.19	8.27	2.069	20.688	0.9464	High	8.2	8.28	2.005	20.046	0.949	High	8.19	8.27	2.369	23.691	0.9454	High	8.19
Apo	395	407	CQRRTSPKPFTEE	5.57	3	9	5.93	6.01	0.936	10.395	0.952	High	5.93	6.01	0.946	10.509	0.9572	High	5.93	6.01	0.949	10.545	0.9508	High	5.93	6.01	1.794	19.937	0.95	High	5.93	6.01	1.74	19.331	0.9509	High	5.93	6.01	1.743	19.366	0.9205	High	5.93	6.01	2.645	29.385	0.9405	High	5.93
Apo	414	428	LEFSIKIKDLPKGAL	10.7	3	12	10.89	10.96	0.738	6.148	0.8675	Medium	10.89	10.96	0.8	6.664	0.8574	Medium	10.89	10.96	0.74	6.163	0.8817	Medium	10.89	10.96	0.977	8.143	0.8678	Medium	10.89	10.96	0.937	7.811	0.8845	Medium	10.89	10.96	0.938	7.818	0.8854	Medium	10.89	10.96	1.645	13.71	0.8626	Medium	10.89
Apo	417	431	SIKIKDLPKGALLNL	10.61	4	12	10.84	10.92	0.079	0.66	0.9309	High	10.84	10.92	0.074	0.617	0.9292	High	10.84	10.92	0.078	0.653	0.9401	High	10.84	10.92	0.151	1.26	0.9079	Medium	10.84	10.92	0.196	1.637	0.9334	High	10.84	10.91	0.281	2.34	0.9207	Medium	10.84	10.92	0.411	3.426	0.9224	Medium	10.84
Apo	432	441	QIYCGKAPAL	9.16	1	7	9.28	9.35	3.011	43.012	0.7316	Medium	9.28	9.35	2.895	41.354	0.7651	Medium	9.28	9.35	2.899	41.421	0.7686	Medium	9.28	9.35	2.891	41.307	0.7263	Medium	9.35	9.41	2.835	40.505	0.744	Medium	9.28	9.35	2.767	39.529	0.7454	Medium	9.28	9.35	3.174	45.348	0.8101	Medium	9.36
Apo	463	468	YVNLLL	13.46	2	4	13.63	13.71	0.062	1.558	0.8422	Medium	13.63	13.71	0.068	1.689	0.8578	Medium	13.64	13.71	0.085	2.127	0.8747	Medium	13.64	13.71	0.111	2.786	0.8972	Medium	13.63	13.71	0.111	2.766	0.8826	Medium	13.64	13.72	0.076	1.906	0.9049	Medium	13.64	13.71	0.345	8.615	0.8926	Medium	13.63
Apo	467	479	LLIDHRFLLRRGE	9	4	11	9.26	9.34	0.329	2.995	0.9521	High	9.27	9.34	0.36	3.275	0.9498	High	9.26	9.34	0.265	2.405	0.9543	High	9.26	9.34	1.014	9.217	0.9197	High	9.26	9.34	1.014	9.221	0.9428	High	9.26	9.35	0.982	8.923	0.9318	High	9.26	9.34	1.249	11.351	0.9166	High	9.26
Apo	467	480	LLIDHRFLLRRGEY	9.59	4	12	9.72	9.8	0.278	2.315	0.9146	Medium	9.72	9.8	0.301	2.511	0.9151	Medium	9.73	9.8	0.304	2.535	0.9181	Medium	9.73	9.8	1.039	8.661	0.9127	Medium	9.72	9.8	0.944	7.865	0.9135	Medium	9.72	9.8	0.945	7.876	0.9154	Medium	9.73	9.8	1.281	10.677	0.9092	Medium	9.72
Apo	467	484	LLIDHRFLLRRGEYVLHM	10.56	4	16	10.71	10.8	0.725	4.53	0.8683	Medium	10.72	10.8	0.727	4.543	0.8707	Medium	10.72	10.8	0.727	4.541	0.8745	Medium	10.72	10.8	2.093	13.081	0.8643	Medium	10.71	10.8	1.998	12.488	0.8631	Medium	10.71	10.8	1.983	12.396	0.8651	Medium	10.72	10.8	2.741	17.132	0.8578	Medium	10.71
Apo	485	497	WQISGKGEDQGSF	9.72	2	11	9.98	10.06	5.919	53.812	0.773	Medium	9.98	10.07	5.819	52.897	0.7787	Medium	9.98	10.06	5.842	53.112	0.7595	Medium	9.98	10.06	6.383	58.028	0.8146	Medium	10.04	10.14	6.214	56.491	0.7653	Medium	10.03	10.13	6.34	57.635	0.7724	Medium	9.88	9.96	6.626	60.238	0.7439	Medium	10.02
Apo	498	513	NADKLTSATNPDKENS	5.28	2	13	5.44	5.52	2.49	19.151	0.8693	Medium	5.44	5.52	2.476	19.046	0.8876	Medium	5.44	5.52	2.505	19.269	0.8881	Medium	5.44	5.52	3.818	29.369	0.8937	Medium	5.44	5.52	3.861	29.699	0.8716	Medium	5.43	5.52	3.676	28.273	0.8699	Medium	5.44	5.52	4.852	37.323	0.8859	Medium	5.44
Apo	498	514	NADKLTSATNPDKENSM	6.42	3	14	6.62	6.69	2.491	17.791	0.8552	Medium	6.62	6.69	2.511	17.938	0.8526	Medium	6.62	6.69	2.509	17.92	0.8407	Medium	6.62	6.69	4.302	30.728	0.8369	Medium	6.62	6.69	4.184	29.887	0.8357	Medium	6.63	6.69	4.198	29.984	0.8081	Medium	6.62	6.69	5.437	38.835	0.8075	Medium	6.62
Apo	498	515	NADKLTSATNPDKENSMS	6.15	3	15	6.43	6.51	2.375	15.833	0.9116	High	6.44	6.51	2.436	16.237	0.9084	High	6.44	6.51	2.415	16.099	0.9088	High	6.44	6.51	4.035	26.9	0.8944	High	6.43	6.51	4.034	26.894	0.9183	High	6.44	6.52	4.009	26.728	0.8393	Medium	6.44	6.51	5.066	33.771	0.8241	Medium	6.44
Apo	498	517	NADKLTSATNPDKENSMSIS	7.37	3	17	7.46	7.53	2.394	14.082	0.9201	High	7.46	7.54	2.375	13.969	0.9248	High	7.46	7.54	2.381	14.007	0.9244	High	7.46	7.54	4.091	24.065	0.9209	High	7.46	7.53	3.971	23.36	0.9184	High	7.47	7.54	3.979	23.407	0.914	High	7.46	7.54	5.084	29.907	0.9025	High	7.46
Apo	500	515	DKLTSATNPDKENSMS	6.05	3	13	6.19	6.27	2.51	19.31	0.8154	Medium	6.19	6.27	2.477	19.054	0.8219	Medium	6.19	6.27	2.545	19.574	0.8119	Medium	6.19	6.27	4.074	31.336	0.8802	Medium	6.19	6.27	3.972	30.553	0.8352	Medium	6.19	6.27	3.845	29.579	0.8534	Medium	6.19	6.27	4.76	36.616	0.8235	Medium	6.19
Apo	520	551	LDNYCHPIALPKHQPTPDPEGDRVRAEMPNQL	8.94	4	24	9.03	9.1	9.37	39.04	0.8471	Medium	9.03	9.11	9.194	38.307	0.8541	High	9.03	9.1	9.292	38.715	0.8414	Medium	9.03	9.11	10.729	44.703	0.8799	High	9.03	9.1	10.692	44.55	0.8748	High	8.93	9.01	10.415	43.394	0.8685	High	9.03	9.1	11.401	47.502	0.8691	High	9.03
Apo	557	592	AIIATDPLNPLTAEDKELLWHFRYESLKHPKAYPKL	11.09	5	30	11.12	11.19	2.858	9.526	0.8308	Medium	11.12	11.19	2.811	9.369	0.8445	Medium	11.12	11.19	2.87	9.567	0.8458	Medium	11.12	11.2	6.131	20.437	0.8508	Medium	11.12	11.19	5.756	19.186	0.833	Medium	11.12	11.19	5.76	19.2	0.8416	Medium	11.12	11.19	9.727	32.423	0.817	Medium	11.12
Apo	558	573	IIATDPLNPLTAEDKE	10.45	2	12	10.65	10.71	2.979	24.823	0.8282	Medium	10.65	10.72	2.956	24.632	0.8373	Medium	10.65	10.72	2.959	24.661	0.8245	Medium	10.63	10.71	4.852	40.436	0.8203	Medium	10.61	10.69	4.639	38.657	0.8077	Medium	10.48	10.55	4.72	39.331	0.7288	Medium	10.65	10.72	6.608	55.068	0.8004	Medium	10.65
Apo	558	578	IIATDPLNPLTAEDKELLWHF	13.76	3	17	13.89	13.97	2.43	14.295	0.8345	Medium	13.9	13.98	2.56	15.056	0.844	Medium	13.9	13.97	2.466	14.507	0.8359	Medium	13.9	13.97	3.876	22.801	0.7521	Medium	13.89	13.97	3.946	23.213	0.8041	Medium	13.9	13.98	3.6	21.176	0.7706	Medium	13.9	13.97	5.796	34.094	0.7646	Medium	13.89
Apo	579	592	RYESLKHPKAYPKL	6.31	4	10	6.49	6.57	0.212	2.119	0.9085	Medium	6.5	6.57	0.234	2.34	0.9086	Medium	6.49	6.57	0.206	2.058	0.891	Medium	6.49	6.57	0.945	9.447	0.921	Medium	6.49	6.57	0.952	9.516	0.9041	Medium	6.5	6.58	1.014	10.14	0.9178	Medium	6.49	6.57	1.938	19.378	0.9213	Medium	6.49
Apo	593	601	FSSVKWGQQ	8.89	1	7	9.06	9.14	0.485	6.934	0.801	Medium	9.06	9.14	0.36	5.136	0.8187	Medium	9.06	9.14	0.299	4.268	0.8045	Medium	9.06	9.14	1.076	15.375	0.8307	Medium	9.06	9.14	1.042	14.885	0.7978	Medium	9.07	9.14	0.969	13.843	0.8194	Medium	9.06	9.14	2.446	34.946	0.7823	Medium	9.06
Apo	593	605	FSSVKWGQQEIVA	10.39	2	11	10.57	10.65	0.754	6.854	0.8977	High	10.57	10.65	0.776	7.056	0.9034	High	10.57	10.65	0.796	7.235	0.9001	Medium	10.57	10.65	1.784	16.217	0.8907	High	10.57	10.65	1.642	14.924	0.897	High	10.57	10.65	1.625	14.777	0.8902	High	10.57	10.65	3.37	30.638	0.8893	Medium	10.57
Apo	593	610	FSSVKWGQQEIVAKTYQL	10.78	2	16	10.85	10.92	0.695	4.342	0.8332	Medium	10.85	10.92	0.781	4.879	0.8085	Medium	10.85	10.93	0.741	4.63	0.8281	Medium	10.85	10.93	1.689	10.558	0.8615	High	10.85	10.92	1.604	10.028	0.8251	Medium	10.85	10.92	1.647	10.291	0.8433	Medium	10.85	10.92	3.681	23.004	0.8148	Medium	10.85
Apo	593	611	FSSVKWGQQEIVAKTYQLL	12.25	3	17	12.36	12.43	0.52	3.061	0.8973	Medium	12.36	12.43	0.49	2.882	0.8843	Medium	12.36	12.43	0.525	3.089	0.89	Medium	12.36	12.43	1.362	8.014	0.8904	Medium	12.36	12.43	1.265	7.439	0.8784	Medium	12.37	12.43	1.304	7.672	0.8737	Medium	12.36	12.43	3.228	18.985	0.8445	Medium	12.36
Apo	612	622	ARREVWDQSAL	9.21	3	9	9.3	9.39	5.597	62.188	0.8869	Medium	9.31	9.39	5.611	62.342	0.8893	Medium	9.31	9.39	5.639	62.661	0.8946	Medium	9.41	9.48	5.722	63.574	0.8887	Medium	9.38	9.46	5.704	63.381	0.9221	Medium	9.31	9.39	5.613	62.367	0.8948	Medium	9.31	9.39	5.888	65.421	0.9264	Medium	9.31
Apo	623	630	DVGLTMQL	12.15	1	6	12.26	12.33	0.314	5.238	0.8209	Medium	12.26	12.33	0.361	6.012	0.8151	Medium	12.26	12.33	0.323	5.391	0.8113	Medium	12.26	12.33	0.83	13.838	0.7877	Medium	12.26	12.33	0.916	15.271	0.8315	Medium	12.26	12.33	0.866	14.425	0.7795	Medium	12.14	12.21	1.386	23.103	0.8434	Medium	12.38
Apo	623	631	DVGLTMQLL	13.61	2	7	13.71	13.78	0.219	3.135	0.8531	Medium	13.71	13.79	0.201	2.878	0.8295	Medium	13.71	13.79	0.272	3.88	0.8452	Medium	13.71	13.79	0.911	13.01	0.8735	Medium	13.71	13.78	0.926	13.228	0.8546	Medium	13.72	13.79	0.891	12.725	0.8679	Medium	13.71	13.79	1.19	17.004	0.8601	Medium	13.71
Apo	631	635	LDCNF	10.77	1	3	10.84	10.92	0.094	3.122	0.8861	Medium	10.84	10.92	0.092	3.063	0.8851	Medium	10.84	10.92	0.11	3.683	0.8904	Medium	10.84	10.92	0.641	21.372	0.887	Medium	10.94	11.02	0.579	19.287	0.8755	Medium	10.84	10.91	0.605	20.152	0.8922	Medium	10.87	10.95	1.567	52.234	0.8809	Medium	10.9
Apo	634	642	NFSDENVRA	7.27	2	7	7.44	7.51	1.162	16.596	0.7271	Medium	7.44	7.51	1.123	16.041	0.7091	Medium	7.44	7.51	1.13	16.145	0.7426	Medium	7.5	7.58	1.439	20.556	0.8271	Medium	7.44	7.51	1.381	19.725	0.8044	Medium	7.41	7.48	1.314	18.772	0.8096	Medium	7.44	7.51	1.735	24.781	0.788	Medium	7.44
Apo	636	642	SDENVRA	4.38	2	5	4.68	4.75	0.415	8.291	0.956	High	4.68	4.76	0.421	8.411	0.9618	High	4.68	4.76	0.422	8.449	0.9601	High	4.68	4.76	0.533	10.665	0.9449	High	4.68	4.76	0.517	10.345	0.9606	High	4.68	4.75	0.491	9.82	0.9559	High	4.68	4.76	0.788	15.753	0.96	High	4.68
Apo	643	657	IAVQKLESLEDDDVL	11.41	2	13	11.56	11.64	1.576	12.126	0.8814	Medium	11.57	11.64	1.548	11.909	0.8835	Medium	11.56	11.64	1.523	11.719	0.8776	Medium	11.56	11.64	2.116	16.281	0.848	Medium	11.56	11.64	2.084	16.033	0.8841	Medium	11.56	11.64	2.014	15.495	0.8722	Medium	11.57	11.64	2.597	19.979	0.8446	Medium	11.56
Apo	643	662	IAVQKLESLEDDDVLHYLLQ	13.55	3	18	13.53	13.61	1.162	6.454	0.8061	Medium	13.53	13.61	1.201	6.673	0.8496	Medium	13.53	13.61	1.116	6.2	0.832	Medium	13.54	13.61	1.906	10.591	0.8902	Medium	13.53	13.61	1.833	10.183	0.8768	Medium	13.54	13.62	1.897	10.541	0.8962	Medium	13.54	13.61	3.038	16.88	0.8837	Medium	13.53
Apo	651	663	LEDDDVLHYLLQL	14.41	3	11	14.44	14.51	0.007	0.065	0.705	Medium	14.44	14.51	0.059	0.533	0.7914	Medium	14.44	14.51	0.111	1.006	0.7793	Medium	14.44	14.51	0.157	1.429	0.7843	Medium	14.44	14.51	0.288	2.615	0.754	Medium	14.45	14.51	0.17	1.543	0.7775	Medium	14.44	14.51	1.362	12.386	0.7596	Medium	14.44
Apo	652	662	EDDDVLHYLLQ	13.33	3	9	13.4	13.47	0.001	0.013	0.7499	Medium	13.4	13.48	0.082	0.91	0.7722	Medium	13.4	13.48	0.111	1.232	0.7805	Medium	13.4	13.48	0.341	3.786	0.8027	Medium	13.4	13.47	0.286	3.177	0.7877	Medium	13.41	13.48	0.312	3.462	0.7822	Medium	13.4	13.48	1.173	13.031	0.7632	Medium	13.4
Apo	654	662	DDVLHYLLQ	12.98	2	7	13.19	13.26	0.078	1.109	0.8102	Medium	13.19	13.27	0.051	0.728	0.8475	Medium	13.19	13.27	0.09	1.283	0.8477	Medium	13.19	13.27	0.235	3.356	0.8325	Medium	13.19	13.26	0.223	3.184	0.8476	Medium	13.2	13.27	0.209	2.984	0.8467	Medium	13.12	13.19	1.205	17.217	0.8194	Medium	13.22
Apo	655	662	DVLHYLLQ	12.82	2	6	13.01	13.09	0.055	0.922	0.8619	Medium	13.02	13.09	0.073	1.224	0.8824	Medium	13.01	13.09	0.065	1.084	0.8884	Medium	13.02	13.09	0.283	4.716	0.8235	Medium	13.01	13.09	0.26	4.329	0.8708	Medium	13.02	13.1	0.284	4.726	0.8548	Medium	13.02	13.09	1.112	18.527	0.8314	Medium	13.01
Apo	655	663	DVLHYLLQL	14.29	2	7	14.46	14.54	0.085	1.218	0.9029	Medium	14.47	14.54	0.079	1.134	0.9138	Medium	14.47	14.54	0.066	0.94	0.9215	Medium	14.47	14.54	0.325	4.647	0.917	Medium	14.46	14.54	0.329	4.705	0.9132	Medium	14.47	14.55	0.326	4.654	0.9111	Medium	14.47	14.54	1.333	19.042	0.9186	Medium	14.46
Apo	663	677	LVQAVKFEPYHDSAL	9.69	3	12	9.92	9.98	0.276	2.301	0.8701	Medium	9.92	9.99	0.266	2.219	0.8789	Medium	9.92	9.99	0.24	2.004	0.878	Medium	9.92	9.99	0.769	6.411	0.8879	Medium	9.92	9.98	0.831	6.927	0.8726	Medium	9.92	9.98	0.752	6.266	0.8774	Medium	9.92	9.99	0.937	7.806	0.8899	Medium	9.92
Apo	664	677	VQAVKFEPYHDSAL	9.26	2	11	9.35	9.42	0.304	2.766	0.9047	Medium	9.35	9.42	0.228	2.07	0.9113	Medium	9.35	9.42	0.27	2.45	0.9158	Medium	9.35	9.42	0.923	8.392	0.8743	Medium	9.35	9.42	0.781	7.097	0.9002	Medium	9.35	9.43	0.815	7.411	0.8912	Medium	9.35	9.42	0.968	8.802	0.8897	Medium	9.35
Apo	666	677	AVKFEPYHDSAL	8.99	2	9	9.11	9.19	0.262	2.906	0.805	Medium	9.11	9.19	0.307	3.413	0.8158	Medium	9.11	9.19	0.27	2.997	0.8264	Medium	9.11	9.19	0.869	9.655	0.8032	Medium	9.11	9.19	0.792	8.802	0.8171	Medium	9.12	9.19	0.777	8.63	0.83	Medium	9.11	9.19	0.909	10.104	0.8125	Medium	9.11
Apo	681	697	LLKRGLRNKRIGHFLFW	10.28	4	15	10.41	10.5	0.06	0.4	0.9373	Medium	10.42	10.5	0.025	0.17	0.9205	Medium	10.41	10.5	0.093	0.62	0.9275	Medium	10.41	10.5	0.055	0.367	0.8942	Medium	10.41	10.5	0.077	0.516	0.9204	Medium	10.41	10.5	0.058	0.385	0.9007	Medium	10.41	10.5	0.129	0.861	0.8699	Medium	10.41
Apo	681	699	LLKRGLRNKRIGHFLFWFL	12.41	5	17	12.56	12.64	0.06	0.351	0.9343	High	12.57	12.64	0.104	0.613	0.941	High	12.56	12.64	0.024	0.138	0.9272	High	12.56	12.64	0.059	0.347	0.9128	High	12.56	12.64	0.062	0.363	0.924	High	12.57	12.64	0.09	0.531	0.9219	High	12.57	12.64	0.08	0.473	0.9136	High	12.56
Apo	698	713	FLRSEIAQSRHYQQRF	7.69	4	14	7.78	7.85	0.54	3.855	0.8731	Medium	7.78	7.86	0.548	3.916	0.8737	Medium	7.78	7.85	0.498	3.559	0.8603	Medium	7.78	7.85	1.051	7.504	0.886	Medium	7.78	7.85	1.021	7.291	0.8946	Medium	7.79	7.86	1.009	7.21	0.8968	Medium	7.78	7.85	2.326	16.614	0.9011	Medium	7.78
Apo	700	713	RSEIAQSRHYQQRF	5.94	4	12	6.19	6.27	0.286	2.387	0.9021	High	6.19	6.27	0.376	3.135	0.9124	High	6.19	6.27	0.349	2.904	0.9156	High	6.19	6.27	0.947	7.891	0.8393	Medium	6.19	6.27	0.679	5.656	0.9164	High	6.11	6.19	0.739	6.155	0.9326	High	6.19	6.27	1.966	16.386	0.8307	Medium	6.19
Apo	729	738	LHDFTQQVQV	9.15	2	8	9.33	9.4	0.129	1.612	0.8388	Medium	9.33	9.4	0.117	1.468	0.848	Medium	9.33	9.4	0.126	1.572	0.8367	Medium	9.33	9.4	0.077	0.962	0.7429	Medium	9.33	9.4	0.124	1.544	0.8286	Medium	9.34	9.4	0.1	1.254	0.7557	Medium	9.33	9.4	0.12	1.499	0.7556	Medium	9.33
Apo	730	737	HDFTQQVQ	6.37	1	6	6.59	6.66	0.121	2.021	0.8117	Medium	6.6	6.66	0.104	1.74	0.795	Medium	6.59	6.66	0.081	1.346	0.7962	Medium	6.6	6.66	0.034	0.571	0.8277	Medium	6.59	6.66	0.054	0.901	0.7888	Medium	6.59	6.67	0.029	0.482	0.791	Medium	6.6	6.66	0.104	1.725	0.8188	Medium	6.6
Apo	730	738	HDFTQQVQV	8.35	1	7	8.51	8.58	0.3	4.285	0.8019	Medium	8.51	8.58	0.298	4.262	0.7829	Medium	8.51	8.58	0.35	4.993	0.7717	Medium	8.51	8.58	0.226	3.222	0.8269	Medium	8.51	8.58	0.29	4.141	0.8089	Medium	8.52	8.58	0.247	3.522	0.83	Medium	8.51	8.58	0.26	3.712	0.7935	Medium	8.51
Apo	732	737	FTQQVQ	5.59	1	4	5.86	5.92	0.046	1.146	0.8479	Medium	5.86	5.92	0.069	1.737	0.8263	Medium	5.86	5.92	0.044	1.095	0.8271	Medium	5.86	5.92	0.07	1.738	0.8879	Medium	5.86	5.92	0.052	1.308	0.8542	Medium	5.85	5.92	0.075	1.874	0.8805	Medium	5.86	5.92	0.098	2.457	0.8806	Medium	5.86
Apo	732	738	FTQQVQV	8.2	1	5	8.43	8.51	0.176	3.528	0.8694	Medium	8.43	8.51	0.101	2.021	0.8272	Medium	8.43	8.51	0.137	2.739	0.8149	Medium	8.43	8.51	0.14	2.805	0.8241	Medium	8.48	8.56	0.175	3.503	0.8371	Medium	8.44	8.52	0.093	1.864	0.8292	Medium	8.43	8.51	0.08	1.603	0.8202	Medium	8.43
Apo	742	747	LQKVTL	8.23	1	4	8.48	8.56	0.272	6.798	0.9448	Medium	8.49	8.56	0.255	6.367	0.9389	Medium	8.48	8.56	0.286	7.139	0.9387	Medium	8.48	8.56	1.283	32.084	0.914	Medium	8.48	8.56	1.22	30.496	0.9369	Medium	8.49	8.57	1.232	30.809	0.9327	Medium	8.48	8.56	2.313	57.834	0.9209	Medium	8.48
Apo	742	782	LQKVTLDIKSLSAEKYDVSSQVISQLKQKLENLQNSQLPES	12.36	5	38	12.56	12.64	18.794	49.458	0.8556	Medium	12.57	12.64	18.352	48.295	0.8329	Medium	12.56	12.64	18.599	48.944	0.8295	Medium	12.68	12.75	25.164	66.221	0.6586	Medium	12.56	12.64	25.059	65.945	0.8121	Medium	12.44	12.51	24.753	65.139	0.8193	Medium	12.57	12.64	27.667	72.808	0.798	Medium	12.56
Apo	748	767	DIKSLSAEKYDVSSQVISQL	11.14	3	18	11.31	11.4	13.295	73.862	0.8939	Medium	11.31	11.4	13.403	74.463	0.8872	Medium	11.32	11.41	13.228	73.49	0.867	Medium	11.28	11.36	13.611	75.618	0.8791	Medium	11.24	11.32	13.595	75.525	0.905	Medium	11.18	11.26	13.314	73.968	0.9081	Medium	11.24	11.33	13.778	76.544	0.9012	Medium	11.23
Apo	748	782	DIKSLSAEKYDVSSQVISQLKQKLENLQNSQLPES	12.56	5	32	12.61	12.69	18.337	57.304	0.9206	High	12.62	12.69	18.202	56.88	0.9211	High	12.61	12.69	18.346	57.331	0.9071	High	12.61	12.69	23.52	73.501	0.9059	High	12.61	12.69	23.481	73.377	0.913	High	12.47	12.54	23.42	73.187	0.8865	Medium	12.62	12.69	25.413	79.415	0.9071	High	12.61
Apo	755	782	EKYDVSSQVISQLKQKLENLQNSQLPES	12.25	4	25	12.36	12.43	12.891	51.564	0.8588	Medium	12.36	12.43	12.867	51.47	0.8564	Medium	12.36	12.44	13.096	52.384	0.8563	Medium	12.36	12.44	18.619	74.476	0.7789	Medium	12.36	12.43	18.495	73.98	0.823	Medium	12.16	12.25	18.514	74.055	0.7657	Medium	12.36	12.44	19.949	79.797	0.7551	Medium	12.36
Apo	768	782	KQKLENLQNSQLPES	7.11	2	12	7.34	7.42	4.436	36.967	0.9415	High	7.34	7.42	4.406	36.716	0.9484	High	7.34	7.42	4.466	37.217	0.9482	High	7.34	7.42	7.865	65.541	0.937	High	7.34	7.42	7.697	64.14	0.9445	High	7.26	7.33	7.586	63.213	0.8591	High	7.34	7.42	9.089	75.74	0.945	High	7.34
Apo	783	796	FRVPYDPGLKAGAL	10.17	3	10	10.44	10.51	0.134	1.344	0.9015	High	10.44	10.52	0.134	1.338	0.909	High	10.44	10.51	0.119	1.185	0.901	High	10.44	10.52	0.457	4.575	0.9101	High	10.44	10.51	0.433	4.333	0.9142	High	10.44	10.51	0.442	4.419	0.9106	High	10.44	10.51	1.588	15.88	0.9001	High	10.44
Apo	797	815	AIEKCKVMASKKKPLWLEF	10.45	2	16	10.5	10.58	1.418	8.862	0.9333	High	10.51	10.58	1.4	8.753	0.9266	High	10.51	10.58	1.435	8.966	0.9248	High	10.51	10.58	2.293	14.329	0.9138	High	10.51	10.58	2.143	13.391	0.9082	High	10.5	10.58	2.08	13.002	0.9151	High	10.51	10.58	3.375	21.094	0.8955	High	10.5
Apo	816	829	KCADPTALSNETIG	8.17	2	11	8.4	8.47	4.066	36.961	0.9335	High	8.4	8.47	4.01	36.452	0.9334	High	8.4	8.47	4.063	36.932	0.9359	High	8.4	8.48	6.451	58.647	0.9164	Medium	8.4	8.47	6.291	57.189	0.911	Medium	8.35	8.42	6.183	56.205	0.9222	Medium	8.47	8.54	7.247	65.88	0.8681	Medium	8.4
Apo	816	842	KCADPTALSNETIGIIFKHGDDLRQDM	12.04	4	24	12.1	12.22	4.241	17.669	0.8741	Medium	12.1	12.23	4.193	17.469	0.889	Medium	12.1	12.23	4.218	17.576	0.8756	Medium	12.1	12.23	7.609	31.705	0.8161	Medium	12.1	12.22	7.424	30.934	0.8598	Medium	12.11	12.22	7.17	29.876	0.8297	Medium	12.1	12.23	9.4	39.167	0.7958	Medium	12.1
Apo	832	845	FKHGDDLRQDMLIL	9.83	4	12	9.85	9.93	0.34	2.831	0.8544	Medium	9.86	9.93	0.258	2.152	0.8836	Medium	9.85	9.93	0.306	2.547	0.814	Medium	9.85	9.93	1.242	10.346	0.8754	Medium	9.85	9.93	1.221	10.179	0.8815	Medium	9.85	9.92	1.199	9.988	0.8941	Medium	9.85	9.93	2.104	17.536	0.8601	Medium	9.85
Apo	844	852	ILQILRIME	13.25	2	7	13.29	13.37	0.042	0.603	0.7487	Medium	13.29	13.37	0.135	1.926	0.7807	Medium	13.29	13.37	0.133	1.893	0.8335	Medium	13.29	13.37	0.109	1.554	0.8975	Medium	13.29	13.36	0.074	1.054	0.8315	Medium	13.3	13.37	0.016	0.232	0.8883	Medium	13.29	13.37	0.029	0.42	0.9029	Medium	13.29
Apo	849	862	RIMESIWETESLDL	13.25	2	12	13.41	13.48	0.568	4.737	0.8202	Medium	13.41	13.48	0.68	5.667	0.8221	Medium	13.41	13.48	0.499	4.159	0.8157	Medium	13.41	13.49	1.057	8.811	0.832	Medium	13.41	13.48	0.999	8.323	0.838	Medium	13.41	13.49	1.107	9.228	0.8407	Medium	13.41	13.49	2.281	19.012	0.831	Medium	13.41
Apo	853	861	SIWETESLD	11.57	1	7	11.7	11.78	0.525	7.506	0.8739	Medium	11.71	11.78	0.514	7.342	0.8814	Medium	11.71	11.78	0.541	7.731	0.8782	Medium	11.71	11.78	0.969	13.841	0.833	Medium	11.7	11.78	0.929	13.273	0.8586	Medium	11.7	11.79	0.903	12.897	0.8613	Medium	11.71	11.79	1.782	25.459	0.8747	Medium	11.7
Apo	853	862	SIWETESLDL	13.36	1	8	13.53	13.61	0.531	6.635	0.8156	Medium	13.53	13.61	0.474	5.925	0.8365	Medium	13.53	13.61	0.435	5.443	0.837	Medium	13.54	13.61	0.853	10.659	0.7747	Medium	13.53	13.61	0.872	10.894	0.8095	Medium	13.54	13.62	0.867	10.832	0.8044	Medium	13.54	13.61	1.868	23.345	0.758	Medium	13.53
Apo	862	878	LCLLPYGCISTGDKIGM	13.08	2	14	13.21	13.27	0.325	2.318	0.895	Medium	13.21	13.28	0.353	2.524	0.9095	Medium	13.21	13.27	0.303	2.166	0.8988	Medium	13.21	13.28	0.861	6.149	0.9058	Medium	13.21	13.27	0.725	5.18	0.9025	Medium	13.21	13.28	0.723	5.166	0.9052	Medium	13.21	13.28	2.015	14.39	0.9053	Medium	13.21
Apo	863	878	CLLPYGCISTGDKIGM	12.04	2	13	12.17	12.25	0.31	2.388	0.9013	Medium	12.18	12.25	0.348	2.675	0.9072	Medium	12.18	12.25	0.324	2.488	0.8927	Medium	12.18	12.25	0.921	7.087	0.9084	Medium	12.17	12.25	0.925	7.119	0.8999	Medium	12.18	12.25	0.858	6.603	0.9112	Medium	12.18	12.25	2.081	16.006	0.9061	Medium	12.17
Apo	865	878	LPYGCISTGDKIGM	10.57	2	12	10.6	10.66	0.453	3.771	0.6819	Medium	10.6	10.67	0.41	3.419	0.6821	Medium	10.6	10.67	0.454	3.781	0.7022	Medium	10.6	10.67	0.885	7.372	0.7256	Medium	10.6	10.66	0.774	6.452	0.6955	Medium	10.6	10.66	0.855	7.128	0.719	Medium	10.6	10.66	1.937	16.146	0.7174	Medium	10.6
Apo	879	887	IEIVKDATT	7.16	1	7	7.37	7.44	1.856	26.508	0.9127	Medium	7.37	7.44	1.881	26.874	0.9116	Medium	7.37	7.44	1.863	26.616	0.903	Medium	7.37	7.44	2.978	42.545	0.9084	Medium	7.37	7.44	3.027	43.247	0.8986	Medium	7.37	7.45	2.914	41.629	0.9057	Medium	7.37	7.44	3.677	52.532	0.9106	Medium	7.37
Apo	888	901	IAKIQQSTVGNTGA	6.15	2	12	6.33	6.41	6.138	51.151	0.9306	High	6.34	6.41	6.178	51.487	0.924	High	6.33	6.41	6.274	52.286	0.9115	Medium	6.34	6.41	6.727	56.055	0.9031	Medium	6.33	6.41	6.723	56.027	0.9008	Medium	6.27	6.33	6.634	55.279	0.9117	Medium	6.33	6.41	7.42	61.833	0.8991	Medium	6.34
Apo	902	910	FKDEVLNHW	10.1	3	7	10.29	10.36	0.159	2.272	0.8651	Medium	10.29	10.37	0.153	2.187	0.8892	Medium	10.29	10.36	0.044	0.633	0.8742	Medium	10.29	10.36	0.329	4.693	0.8376	Medium	10.29	10.36	0.288	4.118	0.8894	Medium	10.29	10.36	0.216	3.092	0.8639	High	10.29	10.36	0.741	10.586	0.8113	Medium	10.29
Apo	908	924	NHWLKEKSPTEEKFQAA	7.08	3	14	7.27	7.36	1.582	11.301	0.7972	Medium	7.28	7.36	1.422	10.154	0.8096	Medium	7.27	7.36	1.441	10.295	0.8075	Medium	7.28	7.36	2.514	17.961	0.8145	Medium	7.27	7.36	2.467	17.621	0.8011	Medium	7.28	7.37	2.474	17.669	0.8053	Medium	7.28	7.36	3.397	24.262	0.8064	Medium	7.28
Apo	927	934	RFVYSCAG	8.29	2	6	8.6	8.69	0.084	1.406	0.8753	Medium	8.6	8.7	0.089	1.485	0.8701	Medium	8.6	8.69	0.064	1.074	0.8673	Medium	8.6	8.69	0.141	2.347	0.8405	Medium	8.6	8.69	0.074	1.241	0.8951	Medium	8.61	8.7	0.119	1.989	0.844	Medium	8.6	8.69	0.076	1.262	0.8214	Medium	8.6
Apo	935	939	YCVAT	6.89	1	3	7.13	7.21	0.038	1.283	0.9023	Medium	7.13	7.21	0.024	0.791	0.9091	Medium	7.13	7.21	0.011	0.365	0.9051	Medium	7.13	7.21	0.056	1.867	0.9125	High	7.13	7.21	0.026	0.865	0.9052	Medium	7.14	7.21	0.041	1.361	0.9108	High	7.13	7.21	0.041	1.372	0.9011	High	7.13
Apo	940	953	FVLGIGDRHNDNIM	10.61	2	12	10.82	10.9	0.118	0.984	0.9006	Medium	10.82	10.9	0.133	1.107	0.9045	Medium	10.82	10.9	0.118	0.984	0.8979	Medium	10.83	10.9	0.291	2.423	0.9021	Medium	10.82	10.9	0.257	2.144	0.9033	Medium	10.82	10.9	0.273	2.272	0.911	Medium	10.82	10.9	0.798	6.65	0.8981	Medium	10.82
Apo	954	960	ITETGNL	7.64	1	5	7.82	7.9	0.208	4.153	0.8864	Medium	7.82	7.9	0.214	4.277	0.894	Medium	7.82	7.9	0.211	4.221	0.8843	Medium	7.82	7.9	0.904	18.09	0.9155	High	7.82	7.9	0.863	17.262	0.9085	High	7.83	7.9	0.841	16.813	0.9302	High	7.82	7.9	1.383	27.655	0.9336	High	7.82
Apo	954	961	ITETGNLF	11.35	1	6	11.48	11.54	0.341	5.688	0.7372	Medium	11.48	11.55	0.277	4.62	0.7818	Medium	11.52	11.59	0.176	2.933	0.8131	Medium	11.48	11.55	0.789	13.143	0.7032	Medium	11.48	11.55	0.775	12.916	0.752	Medium	11.48	11.54	0.715	11.912	0.766	Medium	11.48	11.55	1.16	19.328	0.7426	Medium	11.48
Apo	954	976	ITETGNLFHIDFGHILGNYKSFL	13.82	4	21	13.99	14.07	6.199	29.518	0.7472	Medium	14	14.08	6.43	30.618	0.7848	Medium	14	14.07	6.193	29.49	0.7573	Medium	14	14.07	6.943	33.062	0.7772	Medium	13.99	14.07	7.198	34.276	0.7633	Medium	14	14.08	6.861	32.672	0.7784	Medium	14	14.07	7.537	35.892	0.7582	Medium	13.99
Apo	961	972	FHIDFGHILGNY	12.72	3	10	12.89	12.96	3.33	33.3	0.9264	High	12.89	12.97	3.293	32.928	0.9213	High	12.89	12.96	3.37	33.702	0.9325	High	12.89	12.97	3.805	38.05	0.9341	High	12.89	12.96	3.744	37.437	0.9265	High	12.89	12.97	3.602	36.02	0.9302	High	12.89	12.97	3.991	39.915	0.9208	High	12.89
Apo	961	976	FHIDFGHILGNYKSFL	13.36	4	14	13.49	13.57	6.607	47.196	0.9137	High	13.49	13.57	6.669	47.638	0.9304	High	13.49	13.57	6.639	47.422	0.93	High	13.49	13.57	7.009	50.065	0.9327	High	13.49	13.57	6.786	48.473	0.9343	High	13.5	13.57	6.607	47.195	0.9392	High	13.5	13.57	7.127	50.908	0.935	High	13.49
Apo	962	975	HIDFGHILGNYKSF	11.42	4	12	11.53	11.6	5.212	43.436	0.8837	Medium	11.53	11.61	5.225	43.54	0.8902	Medium	11.53	11.6	5.227	43.561	0.8856	High	11.53	11.61	5.632	46.93	0.8513	Medium	11.53	11.6	5.46	45.502	0.8771	Medium	11.53	11.6	5.361	44.672	0.8659	High	11.53	11.61	5.937	49.475	0.864	Medium	11.53
Apo	973	992	KSFLGINKERVPFVLTPDFL	12.87	4	16	12.85	12.93	3.56	22.251	0.9063	High	12.86	12.93	3.612	22.575	0.9249	High	12.86	12.93	3.631	22.694	0.9189	High	12.86	12.93	4.043	25.267	0.9103	High	12.85	12.93	3.959	24.745	0.9268	High	12.86	12.94	3.894	24.336	0.9236	High	12.86	12.93	4.438	27.738	0.9286	High	12.85
Apo	976	992	LGINKERVPFVLTPDFL	13.24	3	13	13.22	13.31	2.241	17.236	0.9214	High	13.23	13.31	2.186	16.812	0.9325	High	13.22	13.31	2.172	16.711	0.9293	High	13.23	13.31	2.631	20.24	0.9237	High	13.22	13.31	2.549	19.609	0.9251	High	13.23	13.31	2.525	19.425	0.9287	High	13.23	13.31	3.013	23.175	0.9128	High	13.22
Apo	977	992	GINKERVPFVLTPDFL	12.98	3	12	13.13	13.21	1.6	13.331	0.9292	High	13.13	13.22	1.568	13.063	0.9478	High	13.13	13.22	1.548	12.9	0.9392	High	13.13	13.22	2.03	16.919	0.9397	High	13.13	13.21	1.944	16.196	0.9381	High	13.14	13.22	1.934	16.119	0.9377	High	13.14	13.22	2.441	20.342	0.9085	High	13.13
Apo	980	992	KERVPFVLTPDFL	12.82	3	9	12.99	13.06	0.363	4.029	0.7942	Medium	12.99	13.07	0.405	4.496	0.8306	Medium	12.99	13.06	0.365	4.055	0.8539	Medium	12.99	13.07	0.765	8.503	0.8092	Medium	12.99	13.06	0.771	8.566	0.8203	Medium	13	13.07	0.812	9.027	0.8089	Medium	12.99	13.07	1.183	13.141	0.8191	Medium	12.99
Apo	993	1014	FVMGTSGKKTSPHFQKFQDICV	9.54	2	19	9.68	9.76	0.946	4.977	0.7915	Medium	9.68	9.76	0.911	4.792	0.7958	Medium	9.68	9.76	0.913	4.805	0.8043	Medium	9.68	9.76	1.395	7.343	0.7423	Medium	9.68	9.76	1.079	5.679	0.7668	Medium	9.68	9.76	1.214	6.389	0.7563	Medium	9.68	9.76	1.688	8.886	0.7485	Medium	9.68
Apo	1035	1050	LMTGMPQLTSKEDIEY	10.99	2	13	11.07	11.15	4.434	34.11	0.7594	Medium	11.08	11.15	4.405	33.886	0.7815	Medium	11.08	11.15	4.393	33.796	0.771	Medium	11.2	11.28	6.407	49.286	0.6184	Medium	11.08	11.15	6.195	47.653	0.7846	Medium	11.07	11.15	6.061	46.62	0.7982	Medium	11.08	11.15	8.176	62.891	0.772	Medium	11.08
Apo	1050	1071	YIRDALTVGKNEEDAKKYFLDQ	9.85	4	20	9.99	10.06	2.115	10.573	0.7919	Medium	10	10.07	2.117	10.587	0.8056	Medium	9.99	10.06	2.117	10.583	0.7968	Medium	9.99	10.06	2.438	12.191	0.7724	Medium	9.99	10.06	2.235	11.177	0.8097	Medium	9.99	10.06	2.114	10.569	0.778	Medium	9.99	10.06	2.673	13.366	0.7574	Medium	9.99
Apo	1051	1071	IRDALTVGKNEEDAKKYFLDQ	9.48	3	19	9.51	9.58	2.422	12.75	0.7723	Medium	9.51	9.58	2.42	12.736	0.8136	Medium	9.51	9.58	2.427	12.775	0.8091	Medium	9.51	9.58	2.589	13.627	0.7957	Medium	9.51	9.58	2.562	13.483	0.7901	Medium	9.51	9.58	2.453	12.909	0.8052	Medium	9.51	9.58	2.889	15.205	0.7762	Medium	9.51
Apo	1051	1073	IRDALTVGKNEEDAKKYFLDQIE	10.45	4	21	10.57	10.65	2.188	10.417	0.8473	Medium	10.57	10.65	2.147	10.226	0.865	Medium	10.57	10.65	2.156	10.265	0.8664	Medium	10.57	10.65	2.426	11.553	0.8302	Medium	10.57	10.65	2.321	11.054	0.8633	Medium	10.57	10.65	2.327	11.082	0.8565	Medium	10.57	10.65	2.816	13.411	0.8285	Medium	10.57
Apo	1072	1084	IEVCRDKGWTVQF	11.18	3	11	11.32	11.41	1.295	11.775	0.8773	Medium	11.33	11.42	1.299	11.811	0.9025	Medium	11.32	11.41	1.316	11.965	0.8924	Medium	11.32	11.41	3.821	34.734	0.8783	Medium	11.32	11.41	3.618	32.889	0.8892	Medium	11.32	11.41	3.598	32.714	0.89	Medium	11.33	11.42	5.253	47.757	0.8717	Medium	11.32
Apo	1085	1092	NWFLHLVL	14.19	2	6	14.39	14.46	1.593	26.55	0.9227	Medium	14.39	14.47	1.659	27.656	0.9238	High	14.39	14.47	1.626	27.092	0.93	High	14.39	14.47	4.082	68.034	0.921	High	14.39	14.46	4.08	67.992	0.9141	High	14.4	14.47	3.994	66.565	0.9153	High	14.39	14.47	4.6	76.673	0.9259	High	14.39
Apo	1088	1092	LHLVL	11.09	2	3	11.19	11.27	1.213	40.43	0.8967	High	11.23	11.3	1.264	42.133	0.7733	Medium	11.13	11.2	1.244	41.461	0.9054	High	11.17	11.25	2.508	83.61	0.9023	High	11.15	11.22	2.547	84.886	0.9073	High	11.02	11.07	2.544	84.814	0.8375	Medium	11.15	11.22	2.651	88.362	0.9074	High	11.15
Apo	1091	1102	VLGIKQGEKHSA	5.16	3	10	5.3	5.37	4.918	49.179	0.9049	Medium	5.3	5.37	5.053	50.533	0.8817	Medium	5.3	5.37	5.078	50.779	0.8757	Medium	5.3	5.37	5.035	50.352	0.8667	Medium	5.3	5.37	5.002	50.021	0.8768	Medium	5.3	5.37	4.881	48.811	0.8756	Medium	5.3	5.37	5.105	51.046	0.8598	Medium	5.3
Apo	1093	1102	GIKQGEKHSA	3.38	1	8	3.55	3.61	3.733	46.667	0.8004	Medium	3.53	3.6	3.71	46.373	0.8289	Medium	3.48	3.55	3.733	46.659	0.8394	Medium	3.42	3.49	3.852	48.146	0.8134	Medium	3.48	3.55	3.698	46.228	0.8246	Medium	3.48	3.55	3.691	46.141	0.863	Medium	3.48	3.55	3.773	47.157	0.824	Medium	3.48
R1021C	4	12	ENYKQPVVL	9.05	2	6	9.23	9.3	5.045	84.077	0.8241	Medium	9.23	9.31	4.979	82.986	0.827	Medium	9.23	9.31	4.994	83.241	0.8271	Medium	9.24	9.31	5.007	83.45	0.8277	Medium	9.23	9.3	5.026	83.76	0.8253	Medium	9.24	9.31	5.043	84.057	0.8177	Medium	9.23	9.31	5.01	83.492	0.8238	Medium	9.24
R1021C	13	32	REDNCRRRRRMKPRSAAASL	3.92	5	17	4.2	4.3	6.916	40.682	0.9565	High	4.19	4.29	6.85	40.294	0.9548	High	4.14	4.23	6.812	40.073	0.9112	High	4.3	4.37	6.975	41.031	0.8979	High	4.19	4.29	6.757	39.748	0.947	High	4.19	4.29	6.724	39.554	0.9485	High	4.19	4.29	6.968	40.988	0.9485	High	4.19
R1021C	35	41	MELIPIE	12.27	2	4	12.41	12.5	0.668	16.702	0.6636	Medium	12.41	12.5	0.693	17.316	0.724	Medium	12.41	12.5	0.753	18.83	0.7086	Medium	12.41	12.51	1.048	26.205	0.7136	Medium	12.35	12.43	0.993	24.815	0.6479	Medium	12.41	12.51	1.022	25.554	0.7227	Medium	12.37	12.44	1.231	30.768	0.7187	Medium	12.42
R1021C	36	41	ELIPIE	10.66	1	3	10.87	10.98	0.051	1.712	0.8053	Medium	10.88	10.98	0.032	1.078	0.7964	Medium	10.88	10.98	0.044	1.452	0.8003	Medium	10.87	10.97	0.075	2.507	0.8063	Medium	10.88	10.98	0.058	1.943	0.8137	Medium	10.88	10.98	0.088	2.941	0.8057	Medium	10.88	10.98	0.321	10.709	0.8128	Medium	10.88
R1021C	38	58	IPIEFVLPTSQRKCKSPETAL	10.57	4	17	10.56	10.66	3.521	20.712	0.6714	Medium	10.57	10.66	3.387	19.923	0.708	Medium	10.57	10.66	3.379	19.879	0.7234	Medium	10.56	10.65	4.623	27.196	0.7746	Medium	10.56	10.66	4.393	25.84	0.726	Medium	10.57	10.66	4.66	27.414	0.7474	Medium	10.57	10.66	5.112	30.071	0.7614	Medium	10.57
R1021C	42	58	FVLPTSQRKCKSPETAL	8.39	2	13	8.51	8.61	3.974	30.568	0.9297	High	8.51	8.6	3.923	30.176	0.9329	High	8.51	8.6	3.894	29.953	0.9313	High	8.51	8.61	5.437	41.821	0.9351	High	8.51	8.6	5.32	40.924	0.9197	High	8.51	8.61	5.468	42.064	0.9281	High	8.51	8.6	6.032	46.398	0.9261	High	8.51
R1021C	42	59	FVLPTSQRKCKSPETALL	9.43	3	14	9.62	9.72	3.477	24.835	0.8836	Medium	9.63	9.72	3.457	24.69	0.8959	Medium	9.63	9.72	3.427	24.482	0.8907	Medium	9.63	9.72	4.807	34.336	0.9072	Medium	9.63	9.72	4.643	33.161	0.9046	Medium	9.63	9.72	4.757	33.982	0.9036	Medium	9.63	9.72	5.312	37.943	0.9111	Medium	9.63
R1021C	59	70	LHVAGHGNVEQM	6.68	3	10	6.78	6.88	0.448	4.481	0.9001	Medium	6.78	6.87	0.4	3.995	0.9123	Medium	6.78	6.87	0.44	4.4	0.9133	Medium	6.79	6.88	1.175	11.746	0.902	Medium	6.79	6.88	1.222	12.22	0.9076	Medium	6.79	6.88	1.17	11.7	0.9221	Medium	6.78	6.87	1.606	16.056	0.9109	Medium	6.79
R1021C	59	72	LHVAGHGNVEQMKA	5.97	2	12	6.11	6.2	0.398	3.317	0.8804	Medium	6.11	6.2	0.387	3.229	0.8663	Medium	6.11	6.2	0.314	2.62	0.8784	Medium	6.11	6.2	0.982	8.184	0.8773	Medium	6.11	6.2	1.074	8.947	0.8624	Medium	6.11	6.21	1.029	8.579	0.8867	Medium	6.11	6.2	1.35	11.247	0.8812	Medium	6.11
R1021C	60	75	HVAGHGNVEQMKAQVW	8.28	3	14	8.41	8.51	0.246	1.759	0.9298	High	8.41	8.5	0.232	1.657	0.9348	High	8.41	8.5	0.232	1.658	0.9257	High	8.41	8.51	0.587	4.191	0.9288	High	8.41	8.5	0.552	3.939	0.9317	High	8.41	8.51	0.552	3.946	0.9291	High	8.41	8.5	0.938	6.699	0.9313	High	8.41
R1021C	79	84	LETSVA	6.26	1	4	6.48	6.57	2.197	54.927	0.9226	Medium	6.48	6.57	2.146	53.652	0.9241	Medium	6.48	6.57	2.129	53.235	0.9236	Medium	6.48	6.57	3.124	78.102	0.929	Medium	6.48	6.57	3.211	80.287	0.9225	Medium	6.48	6.58	3.173	79.336	0.9194	Medium	6.48	6.57	3.361	84.034	0.9286	Medium	6.48
R1021C	79	86	LETSVAAD	6.15	1	6	6.37	6.47	3.295	54.912	0.9281	High	6.37	6.47	3.292	54.872	0.9318	High	6.37	6.47	3.288	54.801	0.9398	High	6.37	6.47	4.362	72.695	0.9325	High	6.37	6.47	4.428	73.802	0.9353	High	6.37	6.47	4.449	74.145	0.9287	High	6.37	6.47	4.64	77.334	0.9239	High	6.37
R1021C	85	99	ADFYHRLGPHHFLLL	11.31	4	12	11.45	11.52	0.511	4.26	0.76	Medium	11.45	11.52	0.5	4.166	0.8098	Medium	11.45	11.52	0.564	4.697	0.7805	Medium	11.44	11.52	1.484	12.368	0.816	Medium	11.45	11.52	1.447	12.056	0.7769	Medium	11.45	11.53	1.477	12.31	0.7747	Medium	11.45	11.52	1.792	14.935	0.7817	Medium	11.45
R1021C	87	99	FYHRLGPHHFLLL	10.45	2	10	10.5	10.58	0.283	2.834	0.9167	Medium	10.51	10.58	0.288	2.881	0.9122	Medium	10.51	10.58	0.311	3.109	0.8962	Medium	10.5	10.58	0.621	6.208	0.9071	Medium	10.5	10.59	0.592	5.922	0.914	Medium	10.51	10.59	0.636	6.355	0.8967	Medium	10.51	10.58	0.733	7.329	0.9112	Medium	10.51
R1021C	88	98	YHRLGPHHFLL	8.5	3	8	8.6	8.67	0.405	5.058	0.7506	Medium	8.59	8.67	0.364	4.547	0.8075	Medium	8.59	8.67	0.39	4.87	0.8133	Medium	8.6	8.67	0.864	10.795	0.84	Medium	8.6	8.67	0.789	9.863	0.826	Medium	8.6	8.67	0.824	10.294	0.8561	Medium	8.59	8.67	0.963	12.039	0.8693	Medium	8.6
R1021C	100	106	YQKKGQW	6.04	2	5	6.26	6.34	1.676	33.515	0.9245	High	6.26	6.33	1.693	33.857	0.9092	High	6.26	6.34	1.668	33.355	0.9269	High	6.26	6.34	2.808	56.154	0.9382	High	6.26	6.33	2.823	56.458	0.9346	High	6.26	6.34	2.836	56.716	0.9262	High	6.26	6.33	2.934	58.685	0.9355	High	6.27
R1021C	107	118	YEIYDKYQVVQT	9.59	2	10	9.53	9.61	1.028	10.282	0.802	Medium	9.53	9.61	0.963	9.628	0.8059	Medium	9.53	9.61	1.014	10.137	0.8151	Medium	9.54	9.61	2.098	20.981	0.8138	Medium	9.54	9.61	2.159	21.593	0.7986	Medium	9.54	9.61	2.133	21.334	0.821	Medium	9.53	9.61	3.136	31.358	0.8063	Medium	9.54
R1021C	114	121	QVVQTLDC	8.83	1	6	9.03	9.1	1.021	17.017	0.8743	Medium	9.02	9.1	0.98	16.331	0.8842	Medium	9.02	9.1	1.001	16.676	0.8827	Medium	9.03	9.1	1.377	22.949	0.8918	Medium	9.02	9.1	1.46	24.331	0.8899	Medium	9.03	9.1	1.396	23.266	0.8861	Medium	9.02	9.1	1.471	24.516	0.8824	Medium	9.03
R1021C	122	137	LRYWKATHRSPGQIHL	7.53	4	13	7.72	7.79	0.383	2.943	0.9064	Medium	7.71	7.79	0.403	3.101	0.9027	High	7.71	7.79	0.409	3.147	0.9128	High	7.72	7.79	1.379	10.606	0.9113	High	7.71	7.79	1.4	10.77	0.9074	Medium	7.72	7.79	1.447	11.134	0.9199	High	7.71	7.79	2.203	16.946	0.9115	Medium	7.72
R1021C	122	149	LRYWKATHRSPGQIHLVQRHPPSEESQA	6.41	5	23	6.61	6.68	1.996	8.677	0.9464	High	6.6	6.68	2.037	8.858	0.9421	High	6.6	6.68	2.015	8.759	0.9466	High	6.6	6.68	4.259	18.517	0.944	High	6.6	6.69	4.251	18.484	0.9469	High	6.61	6.68	4.461	19.396	0.9443	High	6.6	6.68	5.562	24.182	0.9465	High	6.61
R1021C	122	157	LRYWKATHRSPGQIHLVQRHPPSEESQAFQRQLTAL	8.72	5	31	8.73	8.81	1.771	5.713	0.9167	High	8.73	8.8	1.724	5.56	0.9233	High	8.73	8.8	1.735	5.596	0.931	High	8.73	8.81	4.509	14.546	0.9178	High	8.73	8.8	4.503	14.527	0.9133	High	8.73	8.81	4.597	14.831	0.9158	High	8.73	8.8	6.452	20.811	0.9187	High	8.73
R1021C	125	157	WKATHRSPGQIHLVQRHPPSEESQAFQRQLTAL	8.68	5	28	8.74	8.82	1.616	5.771	0.8383	Medium	8.74	8.81	1.645	5.875	0.8547	Medium	8.74	8.81	1.53	5.463	0.8444	Medium	8.74	8.82	4.239	15.138	0.8192	Medium	8.74	8.81	4.431	15.825	0.8158	Medium	8.74	8.82	4.506	16.091	0.8014	Medium	8.74	8.81	6.135	21.912	0.8187	Medium	8.74
R1021C	138	157	VQRHPPSEESQAFQRQLTAL	9.74	4	16	9.92	9.98	1.625	10.156	0.8425	Medium	9.92	9.99	1.612	10.073	0.8675	Medium	9.92	9.99	1.606	10.038	0.8631	Medium	9.92	9.99	3.572	22.326	0.8471	Medium	9.92	9.99	3.642	22.762	0.8382	Medium	9.92	9.99	3.607	22.543	0.8239	Medium	9.92	9.99	4.955	30.969	0.8272	Medium	9.92
R1021C	150	157	FQRQLTAL	9.15	2	6	9.32	9.39	0.163	2.71	0.8934	Medium	9.32	9.39	0.089	1.491	0.8958	Medium	9.32	9.39	0.104	1.739	0.8973	Medium	9.33	9.4	0.405	6.744	0.902	Medium	9.32	9.39	0.438	7.306	0.8965	Medium	9.33	9.39	0.463	7.715	0.9027	Medium	9.33	9.39	1.051	17.513	0.8949	Medium	9.33
R1021C	151	157	QRQLTAL	8.12	2	5	8.32	8.4	0.089	1.77	0.9381	Medium	8.32	8.39	0.086	1.722	0.9335	Medium	8.32	8.39	0.131	2.614	0.9113	Medium	8.32	8.4	0.373	7.468	0.9241	Medium	8.32	8.4	0.402	8.047	0.9335	Medium	8.32	8.4	0.451	9.025	0.9257	Medium	8.32	8.39	1.008	20.164	0.9256	Medium	8.32
R1021C	158	164	IGYDVTD	8.23	1	5	8.44	8.51	0.621	12.416	0.9363	High	8.43	8.51	0.629	12.572	0.9173	High	8.43	8.51	0.607	12.149	0.93	High	8.44	8.51	1.218	24.356	0.9196	High	8.44	8.51	1.273	25.456	0.9349	High	8.44	8.51	1.258	25.153	0.9261	High	8.44	8.51	2.303	46.061	0.9239	High	8.44
R1021C	158	173	IGYDVTDVSNVHDDEL	10.34	2	14	10.54	10.61	3.278	23.413	0.8936	Medium	10.54	10.62	3.214	22.959	0.8933	Medium	10.54	10.62	3.16	22.57	0.8934	Medium	10.54	10.62	4.993	35.663	0.8869	Medium	10.54	10.62	4.924	35.169	0.8774	Medium	10.54	10.62	4.981	35.577	0.8684	Medium	10.54	10.62	6.117	43.695	0.8732	Medium	10.55
R1021C	158	174	IGYDVTDVSNVHDDELE	9.9	2	15	10.08	10.14	3.288	21.919	0.9203	Medium	10.08	10.15	3.257	21.713	0.9261	Medium	10.08	10.15	3.19	21.265	0.9327	Medium	10.08	10.14	4.985	33.234	0.9205	Medium	10.08	10.15	4.97	33.135	0.929	Medium	10.08	10.15	5.054	33.694	0.9248	Medium	10.08	10.15	6.379	42.524	0.905	Medium	10.08
R1021C	165	175	VSNVHDDELEF	10.56	2	9	10.69	10.77	1.189	13.21	0.7879	Medium	10.69	10.77	1.185	13.169	0.7959	Medium	10.69	10.77	1.175	13.059	0.7955	Medium	10.69	10.76	2.305	25.61	0.7819	Medium	10.7	10.77	2.368	26.31	0.7768	Medium	10.7	10.77	2.396	26.618	0.7859	Medium	10.69	10.77	2.747	30.518	0.7933	Medium	10.7
R1021C	174	182	EFTRRGLVT	7	2	7	7.35	7.42	0.087	1.25	0.9399	Medium	7.34	7.42	0.086	1.226	0.9172	Medium	7.34	7.42	0.091	1.296	0.9187	Medium	7.35	7.42	0.184	2.633	0.9184	Medium	7.35	7.42	0.238	3.395	0.9049	Medium	7.35	7.42	0.235	3.353	0.8928	Medium	7.34	7.42	0.544	7.768	0.8845	Medium	7.35
R1021C	174	195	EFTRRGLVTPRMAEVASRDPKL	8.28	5	18	8.32	8.41	1.064	5.91	0.898	Medium	8.32	8.4	0.974	5.413	0.9131	High	8.32	8.4	1.095	6.086	0.8997	High	8.32	8.41	2.048	11.376	0.9318	High	8.32	8.4	2.065	11.471	0.9022	High	8.32	8.4	2.038	11.321	0.9168	High	8.32	8.4	3.636	20.199	0.9281	High	8.32
R1021C	175	182	FTRRGLVT	6.2	2	6	6.36	6.44	0.042	0.698	0.9099	Medium	6.36	6.44	0.047	0.779	0.9218	Medium	6.36	6.44	0.099	1.643	0.9089	Medium	6.36	6.44	0.198	3.3	0.9379	Medium	6.36	6.43	0.24	3.994	0.9225	Medium	6.37	6.44	0.232	3.864	0.9346	Medium	6.36	6.43	0.615	10.253	0.9261	Medium	6.37
R1021C	175	187	FTRRGLVTPRMAE	7.17	3	10	7.27	7.35	0.1	1.002	0.7852	Medium	7.27	7.34	0.112	1.116	0.8147	Medium	7.27	7.34	0.114	1.137	0.82	Medium	7.27	7.35	0.249	2.485	0.8149	Medium	7.27	7.35	0.319	3.189	0.7282	Medium	7.27	7.35	0.284	2.842	0.8188	Medium	7.27	7.34	0.853	8.532	0.8128	Medium	7.36
R1021C	183	195	PRMAEVASRDPKL	6.78	3	10	7.08	7.15	1.066	10.66	0.9096	High	7.07	7.15	1.06	10.595	0.904	High	7.07	7.15	1.161	11.609	0.8994	High	7.08	7.15	1.899	18.994	0.9038	High	7.08	7.15	1.951	19.507	0.901	High	7.08	7.15	2.066	20.657	0.8822	Medium	7.07	7.15	3.164	31.64	0.8829	High	7.08
R1021C	186	195	AEVASRDPKL	5.99	2	7	6.36	6.43	1.038	14.824	0.9502	High	6.35	6.43	1.033	14.756	0.9391	High	6.35	6.43	1.029	14.696	0.941	High	6.35	6.43	1.806	25.803	0.9394	Medium	6.35	6.43	1.864	26.625	0.9244	High	6.36	6.43	1.858	26.549	0.9296	Medium	6.35	6.43	2.786	39.796	0.9326	Medium	6.36
R1021C	188	195	VASRDPKL	5.31	2	5	5.62	5.68	1.011	20.216	0.8984	Medium	5.61	5.68	1.046	20.917	0.9017	Medium	5.61	5.68	1.063	21.263	0.9122	Medium	5.61	5.68	1.71	34.209	0.921	Medium	5.61	5.68	1.718	34.361	0.9328	Medium	5.61	5.69	1.72	34.41	0.9263	Medium	5.61	5.68	2.333	46.651	0.9273	Medium	5.61
R1021C	196	211	YAMHPWVTSKPLPEYL	11.83	3	11	11.97	12.06	2.95	26.818	0.8915	High	11.98	12.06	2.913	26.486	0.8925	High	11.98	12.06	2.918	26.53	0.897	High	11.97	12.06	4.243	38.57	0.8942	High	11.98	12.06	4.269	38.807	0.9003	High	11.98	12.06	4.317	39.246	0.8897	High	11.98	12.06	5.325	48.413	0.8971	High	11.98
R1021C	212	221	WKKIANNCIF	10.5	1	8	10.64	10.71	1.793	22.418	0.8979	Medium	10.64	10.72	1.788	22.345	0.8844	Medium	10.64	10.72	1.794	22.428	0.8855	Medium	10.64	10.71	3.291	41.135	0.8751	Medium	10.65	10.72	3.348	41.849	0.8752	Medium	10.64	10.72	3.32	41.504	0.8502	Medium	10.64	10.72	4.419	55.234	0.869	Medium	10.65
R1021C	222	232	IVIHRSTTSQT	4.69	2	9	4.84	4.91	2.924	32.483	0.9336	Medium	4.83	4.91	2.87	31.891	0.9416	Medium	4.83	4.91	2.865	31.835	0.9145	Medium	4.83	4.91	3.009	33.429	0.9274	Medium	4.83	4.91	2.965	32.944	0.9356	Medium	4.83	4.9	2.96	32.887	0.9396	Medium	4.83	4.91	3.202	35.579	0.9421	Medium	4.83
R1021C	222	245	IVIHRSTTSQTIKVSPDDTPGAIL	9.09	4	20	9.27	9.35	2.291	11.455	0.9126	High	9.27	9.35	2.271	11.354	0.9071	High	9.27	9.35	2.19	10.948	0.917	High	9.28	9.35	3.467	17.337	0.9065	High	9.27	9.35	3.197	15.983	0.9128	High	9.28	9.35	3.314	16.568	0.9089	High	9.27	9.35	4.16	20.8	0.9054	High	9.28
R1021C	233	245	IKVSPDDTPGAIL	9.96	2	9	10.18	10.25	0.836	9.291	0.9131	Medium	10.18	10.25	0.815	9.054	0.91	Medium	10.18	10.26	0.828	9.205	0.9102	Medium	10.18	10.26	1.212	13.464	0.9027	Medium	10.18	10.25	1.171	13.013	0.9101	Medium	10.18	10.26	1.192	13.24	0.9126	Medium	10.18	10.26	1.872	20.798	0.9059	Medium	10.18
R1021C	249	269	FTKMAKKKSLMDIPESQSEQD	7.32	2	18	7.53	7.61	9.102	50.566	0.9256	High	7.53	7.6	9.069	50.381	0.9172	High	7.53	7.6	9.17	50.944	0.9336	High	7.53	7.61	9.875	54.862	0.9281	High	7.53	7.6	9.804	54.468	0.9238	High	7.53	7.61	9.913	55.072	0.9252	High	7.53	7.6	9.913	55.07	0.9306	High	7.53
R1021C	270	280	FVLRVCGRDEY	9.76	3	9	9.87	9.93	0.239	2.655	0.8253	Medium	9.87	9.94	0.187	2.073	0.8652	Medium	9.87	9.94	0.323	3.59	0.823	Medium	9.87	9.94	0.38	4.22	0.8308	Medium	9.87	9.94	0.356	3.952	0.8265	Medium	9.87	9.94	0.404	4.486	0.8245	Medium	9.87	9.94	0.722	8.019	0.814	Medium	9.87
R1021C	270	281	FVLRVCGRDEYL	11.19	3	10	11.29	11.37	0.167	1.672	0.9184	High	11.29	11.37	0.145	1.446	0.926	High	11.29	11.37	0.124	1.24	0.9345	High	11.28	11.37	0.266	2.661	0.9253	High	11.29	11.37	0.29	2.897	0.925	High	11.29	11.37	0.289	2.885	0.93	High	11.29	11.37	0.635	6.355	0.9274	High	11.29
R1021C	282	291	VGETPIKNFQ	8.12	2	7	8.24	8.31	0.599	8.555	0.8813	Medium	8.23	8.31	0.56	7.997	0.8934	Medium	8.23	8.31	0.572	8.173	0.8895	High	8.24	8.31	0.573	8.181	0.9017	High	8.24	8.31	0.579	8.277	0.8918	Medium	8.24	8.31	0.603	8.619	0.8935	High	8.24	8.31	0.635	9.075	0.9031	High	8.24
R1021C	282	307	VGETPIKNFQWVRHCLKNGEEIHVVL	11.35	4	23	11.36	11.43	0.962	4.181	0.9192	High	11.36	11.43	0.971	4.221	0.913	High	11.36	11.43	0.99	4.305	0.9163	High	11.36	11.43	3.605	15.674	0.9152	High	11.36	11.43	3.61	15.695	0.9241	High	11.37	11.43	3.66	15.914	0.9135	High	11.36	11.43	4.098	17.815	0.912	High	11.37
R1021C	292	307	WVRHCLKNGEEIHVVL	8.82	4	14	8.93	9	0.583	4.162	0.8794	Medium	8.92	9	0.633	4.519	0.892	Medium	8.92	9	0.625	4.462	0.8927	High	8.93	9	2.57	18.354	0.8883	Medium	8.92	9	2.588	18.484	0.8847	Medium	8.93	9	2.596	18.541	0.8916	Medium	8.92	9	3.018	21.56	0.8825	Medium	8.93
R1021C	303	315	IHVVLDTPPDPAL	10.29	2	8	10.6	10.67	0.649	8.112	0.7182	Medium	10.6	10.67	0.668	8.347	0.7206	Medium	10.6	10.68	0.667	8.338	0.7158	Medium	10.6	10.67	1.686	21.073	0.7453	Medium	10.6	10.68	1.881	23.517	0.7453	Medium	10.6	10.68	1.697	21.218	0.7469	Medium	10.6	10.68	2.191	27.39	0.7494	Medium	10.6
R1021C	308	315	DTPPDPAL	8.44	1	3	8.67	8.75	0.483	16.088	0.906	Medium	8.66	8.74	0.466	15.527	0.9017	Medium	8.66	8.75	0.493	16.447	0.9011	Medium	8.67	8.75	1.136	37.854	0.8891	Medium	8.66	8.75	1.167	38.916	0.8858	Medium	8.67	8.75	1.161	38.7	0.8879	Medium	8.66	8.75	1.475	49.179	0.8908	Medium	8.67
R1021C	316	335	DEVRKEEWPLVDDCTGVTGY	12.57	3	17	12.65	12.73	6.192	36.425	0.8552	Medium	12.66	12.73	5.962	35.07	0.8364	Medium	12.66	12.73	6.058	35.635	0.8482	Medium	12.66	12.74	7.458	43.872	0.8156	Medium	12.65	12.73	7.428	43.694	0.8359	Medium	12.66	12.73	7.562	44.482	0.8412	Medium	12.65	12.73	7.968	46.869	0.8278	Medium	12.66
R1021C	316	339	DEVRKEEWPLVDDCTGVTGYHEQL	11.93	4	21	11.98	12.06	6.645	31.644	0.8273	Medium	11.98	12.06	6.503	30.966	0.8388	Medium	11.98	12.06	6.653	31.679	0.8493	Medium	11.98	12.06	8.601	40.958	0.8299	Medium	11.99	12.06	8.392	39.963	0.8344	Medium	11.99	12.06	8.548	40.705	0.8392	Medium	11.98	12.06	9.421	44.864	0.8386	Medium	11.99
R1021C	316	350	DEVRKEEWPLVDDCTGVTGYHEQLTIHGKDHESVF	11.04	5	32	11.28	11.35	6.467	20.208	0.913	High	11.28	11.35	6.279	19.622	0.909	High	11.28	11.36	6.242	19.505	0.9091	High	11.28	11.35	9.338	29.182	0.9023	High	11.28	11.35	9.165	28.64	0.8928	High	11.28	11.36	9.313	29.102	0.9012	High	11.28	11.35	10.942	34.195	0.8903	High	11.28
R1021C	340	350	TIHGKDHESVF	6.78	2	9	7.01	7.09	1.217	13.526	0.9052	High	7.01	7.08	1.24	13.776	0.892	Medium	7.01	7.08	1.218	13.533	0.8889	Medium	7.01	7.09	1.965	21.832	0.8856	Medium	7.01	7.09	2.015	22.392	0.8938	Medium	7.01	7.09	2.017	22.417	0.8826	Medium	7.01	7.08	2.278	25.314	0.8876	Medium	7.01
R1021C	355	369	WDCDRKFRVKIRGID	8.99	4	13	8.99	9.06	0.199	1.534	0.8018	Medium	8.99	9.06	0.218	1.675	0.8036	Medium	8.99	9.06	0.298	2.291	0.8258	Medium	8.99	9.06	0.768	5.908	0.8103	Medium	8.99	9.05	0.748	5.751	0.7982	Medium	8.99	9.06	0.762	5.863	0.8174	Medium	8.99	9.06	0.994	7.649	0.8117	Medium	8.99
R1021C	355	379	WDCDRKFRVKIRGIDIPVLPRNTDL	10.5	4	21	10.46	10.55	2.794	13.304	0.8336	Medium	10.46	10.55	2.786	13.268	0.8576	Medium	10.47	10.55	2.805	13.359	0.8697	Medium	10.46	10.55	4.004	19.065	0.8776	Medium	10.46	10.55	4.059	19.329	0.8418	Medium	10.47	10.55	4.137	19.7	0.867	Medium	10.47	10.55	4.582	21.82	0.8752	Medium	10.47
R1021C	355	381	WDCDRKFRVKIRGIDIPVLPRNTDLTV	10.77	4	23	10.81	10.88	2.879	12.517	0.7499	Medium	10.81	10.88	2.813	12.229	0.7698	Medium	10.81	10.89	2.862	12.444	0.7789	Medium	10.81	10.88	4.546	19.765	0.7977	Medium	10.81	10.89	4.546	19.767	0.7925	Medium	10.81	10.89	4.567	19.858	0.7922	Medium	10.81	10.89	5.551	24.133	0.7912	Medium	10.81
R1021C	370	381	IPVLPRNTDLTV	10.11	2	9	10.22	10.29	3.551	39.453	0.892	Medium	10.22	10.3	3.549	39.438	0.891	Medium	10.22	10.3	3.528	39.202	0.8941	Medium	10.23	10.29	4.855	53.944	0.8895	Medium	10.22	10.3	4.852	53.914	0.8871	Medium	10.23	10.3	4.94	54.892	0.8948	Medium	10.22	10.3	5.543	61.587	0.8799	Medium	10.23
R1021C	382	394	FVEANIQHGQQVL	9.2	2	11	9.34	9.45	1.269	11.533	0.9352	High	9.34	9.45	1.241	11.278	0.9347	High	9.34	9.45	1.245	11.317	0.9375	High	9.35	9.45	2.084	18.942	0.925	Medium	9.34	9.45	2.045	18.59	0.9296	High	9.34	9.45	2.073	18.849	0.9193	Medium	9.34	9.45	2.3	20.909	0.922	Medium	9.35
R1021C	383	394	VEANIQHGQQVL	7.96	2	10	8.2	8.28	1.268	12.682	0.9294	High	8.19	8.27	1.279	12.787	0.9386	High	8.19	8.28	1.258	12.578	0.9415	High	8.2	8.28	2.076	20.762	0.9331	High	8.19	8.28	2.115	21.151	0.9398	High	8.19	8.28	2.083	20.826	0.933	High	8.19	8.28	2.329	23.292	0.9331	High	8.2
R1021C	395	407	CQRRTSPKPFTEE	5.57	3	9	5.94	6.01	0.893	9.927	0.9534	High	5.93	6.01	0.906	10.067	0.9507	High	5.93	6.01	0.896	9.954	0.9447	High	5.93	6.01	1.773	19.699	0.9471	High	5.93	6.01	1.849	20.544	0.9484	High	5.94	6.01	1.872	20.797	0.9297	High	5.93	6.01	2.647	29.415	0.9388	High	5.94
R1021C	414	428	LEFSIKIKDLPKGAL	10.7	3	12	10.89	10.96	0.826	6.884	0.8773	Medium	10.89	10.96	0.779	6.49	0.8792	Medium	10.89	10.96	0.721	6.007	0.8754	Medium	10.89	10.96	1.124	9.363	0.8619	Medium	10.9	10.96	1.028	8.564	0.878	Medium	10.9	10.96	1.073	8.939	0.8615	Medium	10.89	10.96	1.78	14.837	0.8378	Medium	10.9
R1021C	417	431	SIKIKDLPKGALLNL	10.61	4	12	10.84	10.92	0.07	0.58	0.9281	High	10.84	10.92	0.073	0.611	0.9207	High	10.84	10.92	0.099	0.822	0.9118	High	10.84	10.92	0.286	2.38	0.9224	Medium	10.85	10.92	0.265	2.212	0.9155	High	10.85	10.92	0.311	2.591	0.9022	Medium	10.84	10.92	0.478	3.981	0.9027	Medium	10.85
R1021C	432	441	QIYCGKAPAL	9.16	1	7	9.28	9.35	3.047	43.525	0.734	Medium	9.28	9.35	3.039	43.41	0.7685	Medium	9.28	9.35	2.902	41.454	0.7917	Medium	9.26	9.34	3.309	47.265	0.7509	Medium	9.28	9.35	3.3	47.148	0.7729	Medium	9.24	9.31	3.363	48.042	0.776	Medium	9.28	9.35	3.441	49.162	0.8369	Medium	9.32
R1021C	463	468	YVNLLL	13.46	2	4	13.64	13.71	0.028	0.688	0.8624	Medium	13.64	13.71	0.128	3.191	0.8683	Medium	13.64	13.71	0.092	2.302	0.86	Medium	13.64	13.72	0.094	2.362	0.8833	Medium	13.64	13.71	0.137	3.419	0.9001	Medium	13.64	13.71	0.094	2.343	0.9006	Medium	13.64	13.71	0.365	9.115	0.8912	Medium	13.64
R1021C	467	479	LLIDHRFLLRRGE	9	4	11	9.26	9.34	0.339	3.078	0.9521	High	9.26	9.34	0.288	2.615	0.9613	High	9.27	9.34	0.297	2.699	0.9538	High	9.27	9.35	1.094	9.947	0.9425	High	9.26	9.34	1.084	9.858	0.9529	High	9.27	9.34	1.093	9.938	0.9405	High	9.27	9.34	1.354	12.312	0.9393	High	9.27
R1021C	467	480	LLIDHRFLLRRGEY	9.59	4	12	9.72	9.8	0.311	2.59	0.9207	Medium	9.73	9.8	0.288	2.397	0.9203	Medium	9.73	9.8	0.314	2.619	0.9268	Medium	9.73	9.81	1.037	8.64	0.9172	Medium	9.73	9.8	1.021	8.508	0.9139	Medium	9.73	9.81	1.043	8.693	0.9067	Medium	9.73	9.8	1.315	10.96	0.9033	Medium	9.73
R1021C	467	484	LLIDHRFLLRRGEYVLHM	10.56	4	16	10.71	10.8	0.67	4.186	0.8701	Medium	10.72	10.8	0.657	4.108	0.8802	Medium	10.72	10.8	0.723	4.518	0.8775	Medium	10.71	10.8	2.161	13.506	0.8712	Medium	10.72	10.8	2.164	13.525	0.8602	Medium	10.72	10.8	2.191	13.692	0.8582	Medium	10.72	10.8	2.804	17.524	0.8723	Medium	10.72
R1021C	485	497	WQISGKGEDQGSF	9.72	2	11	9.98	10.06	5.899	53.627	0.7649	Medium	9.98	10.06	5.773	52.483	0.7668	Medium	9.98	10.06	5.711	51.919	0.7634	Medium	9.98	10.06	6.389	58.081	0.8174	Medium	9.98	10.06	6.15	55.908	0.7822	Medium	9.98	10.07	6.314	57.403	0.8036	Medium	9.98	10.06	6.857	62.336	0.8014	Medium	9.98
R1021C	498	513	NADKLTSATNPDKENS	5.28	2	13	5.44	5.52	2.557	19.668	0.8662	Medium	5.44	5.52	2.554	19.648	0.8633	Medium	5.44	5.52	2.474	19.034	0.875	Medium	5.44	5.52	4.005	30.806	0.868	Medium	5.44	5.52	4.138	31.828	0.8696	Medium	5.43	5.52	4.076	31.352	0.8583	Medium	5.44	5.52	5.198	39.987	0.8612	Medium	5.43
R1021C	498	514	NADKLTSATNPDKENSM	6.42	3	14	6.62	6.69	2.553	18.237	0.8559	Medium	6.62	6.69	2.543	18.166	0.833	Medium	6.62	6.69	2.456	17.544	0.8449	Medium	6.62	6.69	4.425	31.604	0.8176	Medium	6.63	6.69	4.669	33.353	0.8015	Medium	6.63	6.69	4.657	33.264	0.8026	Medium	6.62	6.69	5.645	40.322	0.796	Medium	6.63
R1021C	498	515	NADKLTSATNPDKENSMS	6.15	3	15	6.44	6.52	2.414	16.094	0.9122	High	6.44	6.51	2.404	16.027	0.8943	High	6.44	6.51	2.493	16.619	0.9003	High	6.44	6.51	4.298	28.656	0.8549	Medium	6.43	6.51	4.415	29.431	0.8993	High	6.44	6.52	4.418	29.453	0.8462	Medium	6.43	6.51	5.478	36.52	0.843	Medium	6.44
R1021C	498	517	NADKLTSATNPDKENSMSIS	7.37	3	17	7.46	7.54	2.283	13.43	0.914	High	7.46	7.54	2.371	13.948	0.92	High	7.46	7.54	2.362	13.892	0.9267	High	7.47	7.54	4.21	24.765	0.9173	High	7.46	7.54	4.299	25.287	0.9092	High	7.46	7.54	4.316	25.387	0.9067	High	7.46	7.53	5.231	30.77	0.901	High	7.47
R1021C	500	515	DKLTSATNPDKENSMS	6.05	3	13	6.2	6.27	2.386	18.352	0.8134	Medium	6.19	6.27	2.445	18.806	0.8311	Medium	6.19	6.27	2.265	17.421	0.8179	Medium	6.19	6.27	4.014	30.875	0.8532	Medium	6.19	6.27	4.306	33.121	0.8309	Medium	6.2	6.27	4.217	32.436	0.832	Medium	6.19	6.27	4.928	37.91	0.8392	Medium	6.2
R1021C	520	551	LDNYCHPIALPKHQPTPDPEGDRVRAEMPNQL	8.94	4	24	9.04	9.11	9.359	38.995	0.8873	High	9.03	9.11	9.447	39.362	0.8743	High	9.03	9.11	9.293	38.723	0.8826	High	9.03	9.11	11.058	46.074	0.8613	High	9.03	9.1	10.744	44.766	0.8713	High	9.03	9.11	10.85	45.208	0.8568	High	9.03	9.11	11.455	47.728	0.8597	High	9.03
R1021C	557	592	AIIATDPLNPLTAEDKELLWHFRYESLKHPKAYPKL	11.09	5	30	11.12	11.19	2.894	9.645	0.8112	Medium	11.12	11.19	2.954	9.848	0.8152	Medium	11.12	11.2	2.896	9.653	0.8176	Medium	11.12	11.19	6.614	22.048	0.7643	Medium	11.12	11.2	6.967	23.222	0.7668	Medium	11.07	11.15	6.969	23.231	0.7567	Medium	11.12	11.2	11.851	39.502	0.8076	Medium	11.12
R1021C	558	573	IIATDPLNPLTAEDKE	10.45	2	12	10.65	10.71	3.111	25.926	0.8243	Medium	10.65	10.72	3.107	25.89	0.8216	Medium	10.65	10.72	3.167	26.388	0.8302	Medium	10.65	10.71	5.469	45.575	0.8004	Medium	10.65	10.72	5.626	46.886	0.8077	Medium	10.65	10.72	5.559	46.327	0.804	Medium	10.65	10.72	6.832	56.935	0.8053	Medium	10.65
R1021C	558	578	IIATDPLNPLTAEDKELLWHF	13.76	3	17	13.9	13.97	2.743	16.136	0.8252	Medium	13.9	13.97	2.595	15.266	0.8077	Medium	13.9	13.97	2.602	15.306	0.8147	Medium	13.9	13.98	4.874	28.673	0.7585	Medium	13.9	13.97	4.974	29.257	0.8059	Medium	13.9	13.97	4.771	28.065	0.7849	Medium	13.9	13.97	6.369	37.465	0.7662	Medium	13.9
R1021C	579	592	RYESLKHPKAYPKL	6.31	4	10	6.5	6.57	0.512	5.115	0.9041	Medium	6.49	6.57	0.586	5.857	0.9112	High	6.5	6.57	0.58	5.804	0.8997	High	6.49	6.57	1.457	14.566	0.9077	Medium	6.49	6.57	1.601	16.01	0.9003	Medium	6.5	6.58	1.516	15.163	0.9158	High	6.49	6.57	2.855	28.55	0.9216	Medium	6.5
R1021C	593	601	FSSVKWGQQ	8.89	1	7	9.07	9.14	0.554	7.918	0.7961	Medium	9.06	9.14	0.431	6.154	0.7884	Medium	9.06	9.14	0.434	6.194	0.7795	Medium	9.07	9.14	1.437	20.524	0.7798	Medium	9.13	9.2	1.419	20.274	0.7827	Medium	9.07	9.14	1.505	21.496	0.7866	Medium	9.06	9.14	3.459	49.411	0.7794	Medium	9.07
R1021C	593	605	FSSVKWGQQEIVA	10.39	2	11	10.57	10.65	0.831	7.552	0.8729	High	10.57	10.65	0.891	8.1	0.8729	Medium	10.58	10.65	0.896	8.148	0.873	Medium	10.57	10.65	2.455	22.317	0.8366	Medium	10.61	10.68	2.387	21.7	0.833	Medium	10.58	10.65	2.513	22.842	0.8294	Medium	10.53	10.6	4.839	43.989	0.8879	Medium	10.58
R1021C	593	610	FSSVKWGQQEIVAKTYQL	10.78	2	16	10.85	10.92	0.737	4.609	0.789	Medium	10.85	10.93	0.792	4.952	0.8115	Medium	10.85	10.93	0.72	4.499	0.8093	Medium	10.85	10.92	3.718	23.236	0.8224	Medium	10.85	10.93	3.604	22.524	0.7984	Medium	10.81	10.89	3.879	24.243	0.7466	Medium	10.85	10.93	6.545	40.905	0.8503	Medium	10.86
R1021C	593	611	FSSVKWGQQEIVAKTYQLL	12.25	3	17	12.36	12.43	0.525	3.087	0.8497	Medium	12.36	12.43	0.502	2.95	0.8572	Medium	12.36	12.43	0.496	2.915	0.8667	Medium	12.36	12.43	1.508	8.869	0.8348	Medium	12.36	12.43	1.681	9.885	0.8241	Medium	12.36	12.43	1.737	10.215	0.8201	Medium	12.36	12.43	5.063	29.785	0.8089	Medium	12.37
R1021C	612	622	ARREVWDQSAL	9.21	3	9	9.32	9.39	5.574	61.929	0.8043	Medium	9.31	9.39	5.595	62.161	0.9035	Medium	9.31	9.39	5.524	61.383	0.8969	Medium	9.31	9.4	5.857	65.082	0.9124	Medium	9.3	9.39	5.811	64.571	0.8986	Medium	9.31	9.39	5.943	66.031	0.9003	Medium	9.31	9.39	5.821	64.679	0.9159	Medium	9.31
R1021C	623	630	DVGLTMQL	12.15	1	6	12.26	12.33	0.39	6.508	0.7967	Medium	12.22	12.29	0.555	9.258	0.8106	Medium	12.26	12.33	0.489	8.146	0.7941	Medium	12.26	12.32	1.67	27.835	0.8404	Medium	12.16	12.24	1.566	26.102	0.7884	Medium	12.26	12.33	1.675	27.917	0.7925	Medium	12.26	12.33	2.205	36.754	0.7884	Medium	12.3
R1021C	623	631	DVGLTMQLL	13.61	2	7	13.71	13.79	0.302	4.319	0.8396	Medium	13.71	13.79	0.329	4.698	0.8556	Medium	13.71	13.79	0.406	5.794	0.8478	Medium	13.67	13.74	1.073	15.331	0.8342	Medium	13.71	13.79	1.099	15.705	0.8314	Medium	13.71	13.79	1.126	16.082	0.8203	Medium	13.71	13.79	1.897	27.104	0.864	Medium	13.72
R1021C	631	635	LDCNF	10.77	1	3	10.84	10.92	0.17	5.663	0.8843	Medium	10.84	10.92	0.19	6.325	0.882	Medium	10.84	10.92	0.125	4.176	0.8768	Medium	10.84	10.92	0.812	27.06	0.8903	Medium	10.85	10.92	0.821	27.362	0.8926	Medium	10.85	10.92	0.851	28.372	0.8872	Medium	10.84	10.92	1.723	57.433	0.8916	Medium	10.85
R1021C	634	642	NFSDENVRA	7.27	2	7	7.45	7.52	1.169	16.694	0.6924	Medium	7.44	7.51	1.176	16.793	0.7364	Medium	7.44	7.51	1.152	16.453	0.7164	Medium	7.45	7.52	1.497	21.384	0.7818	Medium	7.45	7.51	1.527	21.816	0.7549	Medium	7.45	7.52	1.499	21.411	0.7521	Medium	7.44	7.51	1.908	27.263	0.7771	Medium	7.45
R1021C	636	642	SDENVRA	4.38	2	5	4.68	4.76	0.466	9.321	0.9574	High	4.68	4.76	0.478	9.55	0.9608	High	4.68	4.76	0.438	8.766	0.957	High	4.68	4.76	0.64	12.796	0.9575	High	4.68	4.76	0.697	13.931	0.944	High	4.68	4.75	0.626	12.514	0.9495	High	4.68	4.76	1.054	21.084	0.9426	High	4.68
R1021C	643	657	IAVQKLESLEDDDVL	11.41	2	13	11.56	11.64	1.5	11.54	0.8864	Medium	11.56	11.64	1.484	11.419	0.8839	Medium	11.57	11.64	1.455	11.195	0.8727	Medium	11.56	11.64	2.228	17.142	0.8462	Medium	11.56	11.64	2.285	17.577	0.8739	Medium	11.57	11.64	2.261	17.39	0.8614	Medium	11.56	11.64	3.023	23.251	0.8455	Medium	11.57
R1021C	643	662	IAVQKLESLEDDDVLHYLLQ	13.55	3	18	13.54	13.61	1.176	6.533	0.8387	Medium	13.54	13.61	1.069	5.94	0.8418	Medium	13.54	13.61	1.147	6.373	0.859	Medium	13.54	13.62	2.058	11.432	0.8722	Medium	13.54	13.61	2.105	11.693	0.8845	Medium	13.54	13.61	2.132	11.842	0.8854	Medium	13.54	13.61	3.451	19.17	0.8715	Medium	13.54
R1021C	651	663	LEDDDVLHYLLQL	14.41	3	11	14.44	14.51	0.104	0.948	0.7594	Medium	14.44	14.51	0.045	0.413	0.7589	Medium	14.44	14.51	0.008	0.071	0.7539	Medium	14.45	14.51	0.565	5.134	0.7546	Medium	14.44	14.51	0.546	4.966	0.7488	Medium	14.44	14.51	0.652	5.925	0.7623	Medium	14.44	14.51	1.691	15.369	0.7586	Medium	14.44
R1021C	652	662	EDDDVLHYLLQ	13.33	3	9	13.43	13.5	0.001	0.012	0.7595	Medium	13.4	13.48	0.007	0.078	0.7914	Medium	13.4	13.48	0.125	1.389	0.7915	Medium	13.41	13.48	0.467	5.187	0.7158	Medium	13.4	13.48	0.482	5.356	0.7808	Medium	13.4	13.48	0.47	5.223	0.7565	Medium	13.4	13.48	1.399	15.542	0.7513	Medium	13.4
R1021C	654	662	DDVLHYLLQ	12.98	2	7	13.19	13.27	0.101	1.442	0.8462	Medium	13.19	13.27	0.025	0.355	0.8211	Medium	13.19	13.27	0.07	1.004	0.8341	Medium	13.2	13.27	0.258	3.68	0.7724	Medium	13.2	13.27	0.335	4.78	0.8088	Medium	13.19	13.27	0.271	3.869	0.7873	Medium	13.19	13.27	1.303	18.61	0.7381	Medium	13.22
R1021C	655	662	DVLHYLLQ	12.82	2	6	13.02	13.09	0.099	1.652	0.8522	Medium	13.02	13.09	0.051	0.857	0.8728	Medium	13.02	13.09	0.066	1.102	0.885	Medium	13.02	13.1	0.456	7.6	0.8362	Medium	13.02	13.1	0.388	6.458	0.8566	Medium	13.02	13.09	0.441	7.357	0.8575	Medium	13.02	13.09	1.433	23.889	0.8273	Medium	13.02
R1021C	655	663	DVLHYLLQL	14.29	2	7	14.47	14.54	0.045	0.647	0.9282	Medium	14.47	14.54	0.046	0.659	0.9068	Medium	14.47	14.54	0.072	1.03	0.9151	Medium	14.47	14.55	0.444	6.345	0.9119	Medium	14.47	14.54	0.477	6.809	0.9009	Medium	14.47	14.54	0.509	7.265	0.9104	Medium	14.47	14.54	1.635	23.358	0.9131	Medium	14.47
R1021C	663	677	LVQAVKFEPYHDSAL	9.69	3	12	9.92	9.98	0.274	2.283	0.8575	Medium	9.92	9.99	0.299	2.493	0.8713	Medium	9.92	9.99	0.255	2.124	0.8722	Medium	9.92	9.99	0.814	6.782	0.8855	Medium	9.92	9.99	0.838	6.987	0.8862	Medium	9.92	9.99	0.871	7.262	0.8636	Medium	9.92	9.99	0.882	7.352	0.8925	Medium	9.92
R1021C	664	677	VQAVKFEPYHDSAL	9.26	2	11	9.35	9.42	0.248	2.252	0.9063	Medium	9.35	9.42	0.242	2.2	0.9048	Medium	9.35	9.43	0.298	2.709	0.913	Medium	9.35	9.43	0.826	7.509	0.8906	Medium	9.35	9.43	0.922	8.383	0.8834	Medium	9.35	9.43	0.873	7.936	0.8939	Medium	9.35	9.43	0.978	8.888	0.8989	Medium	9.35
R1021C	666	677	AVKFEPYHDSAL	8.99	2	9	9.12	9.19	0.311	3.455	0.8135	Medium	9.11	9.19	0.293	3.256	0.7881	Medium	9.11	9.19	0.258	2.862	0.8202	Medium	9.12	9.19	0.85	9.449	0.7913	Medium	9.11	9.19	0.845	9.39	0.843	Medium	9.12	9.19	0.846	9.404	0.8233	Medium	9.12	9.19	0.931	10.35	0.7885	Medium	9.12
R1021C	681	697	LLKRGLRNKRIGHFLFW	10.28	4	15	10.41	10.5	0.044	0.294	0.9306	Medium	10.41	10.5	0.046	0.305	0.925	Medium	10.42	10.5	0.072	0.481	0.9285	Medium	10.41	10.5	0.077	0.512	0.9068	Medium	10.41	10.5	0.124	0.825	0.921	Medium	10.42	10.5	0.082	0.544	0.9072	Medium	10.42	10.5	0.072	0.483	0.9028	Medium	10.42
R1021C	681	699	LLKRGLRNKRIGHFLFWFL	12.41	5	17	12.56	12.64	0.055	0.324	0.9243	High	12.56	12.64	0.097	0.569	0.9081	High	12.56	12.64	0.016	0.097	0.9375	High	12.56	12.64	0.038	0.223	0.9234	High	12.56	12.64	0.085	0.499	0.9151	High	12.57	12.64	0.118	0.696	0.9287	High	12.56	12.64	0.095	0.558	0.9222	High	12.57
R1021C	698	713	FLRSEIAQSRHYQQRF	7.69	4	14	7.78	7.86	0.617	4.407	0.9162	Medium	7.78	7.85	0.586	4.187	0.9243	Medium	7.78	7.86	0.552	3.945	0.9353	Medium	7.78	7.86	1.203	8.591	0.9249	Medium	7.78	7.85	1.284	9.173	0.9313	Medium	7.78	7.86	1.266	9.046	0.9266	Medium	7.79	7.86	2.519	17.995	0.926	Medium	7.78
R1021C	700	713	RSEIAQSRHYQQRF	5.94	4	12	6.2	6.27	0.341	2.838	0.909	High	6.19	6.27	0.4	3.333	0.8825	High	6.19	6.27	0.36	2.997	0.9	High	6.19	6.27	0.798	6.649	0.8458	Medium	6.19	6.27	0.837	6.979	0.895	High	6.12	6.2	0.92	7.671	0.9174	High	6.19	6.27	1.968	16.399	0.8106	Medium	6.2
R1021C	729	738	LHDFTQQVQV	9.15	2	8	9.33	9.4	0.108	1.35	0.8312	Medium	9.33	9.4	0.114	1.424	0.817	Medium	9.33	9.4	0.124	1.546	0.8372	Medium	9.34	9.4	0.123	1.538	0.7718	Medium	9.33	9.4	0.126	1.577	0.8295	Medium	9.34	9.4	0.119	1.483	0.7407	Medium	9.33	9.4	0.118	1.471	0.7556	Medium	9.34
R1021C	730	737	HDFTQQVQ	6.37	1	6	6.6	6.67	0.027	0.453	0.7918	Medium	6.6	6.66	0.075	1.258	0.802	Medium	6.6	6.66	0.057	0.949	0.7769	Medium	6.59	6.66	0.157	2.609	0.783	Medium	6.6	6.67	0.013	0.22	0.7868	Medium	6.6	6.67	0.149	2.478	0.7836	Medium	6.59	6.66	0.067	1.123	0.8121	Medium	6.6
R1021C	730	738	HDFTQQVQV	8.35	1	7	8.51	8.58	0.303	4.327	0.7772	Medium	8.51	8.58	0.285	4.078	0.7686	Medium	8.51	8.58	0.349	4.981	0.769	Medium	8.51	8.58	0.317	4.523	0.7462	Medium	8.51	8.58	0.401	5.727	0.7408	Medium	8.51	8.58	0.344	4.912	0.7488	Medium	8.51	8.58	0.35	4.994	0.7627	Medium	8.51
R1021C	732	737	FTQQVQ	5.59	1	4	5.86	5.93	0.083	2.076	0.8385	Medium	5.86	5.92	0.065	1.632	0.8484	Medium	5.86	5.92	0.012	0.312	0.8086	Medium	5.86	5.92	0.089	2.219	0.8673	Medium	5.86	5.92	0.049	1.231	0.8795	Medium	5.86	5.93	0.106	2.647	0.8688	Medium	5.86	5.92	0.109	2.726	0.8695	Medium	5.86
R1021C	732	738	FTQQVQV	8.2	1	5	8.44	8.51	0.259	5.177	0.8332	Medium	8.43	8.51	0.135	2.705	0.832	Medium	8.43	8.51	0.22	4.393	0.8168	Medium	8.44	8.51	0.151	3.019	0.8214	Medium	8.44	8.51	0.28	5.602	0.7968	Medium	8.44	8.51	0.183	3.651	0.8067	Medium	8.44	8.51	0.192	3.846	0.8072	Medium	8.44
R1021C	742	747	LQKVTL	8.23	1	4	8.49	8.56	0.261	6.533	0.9403	Medium	8.48	8.56	0.269	6.72	0.9469	Medium	8.49	8.56	0.285	7.128	0.9431	Medium	8.49	8.56	1.364	34.092	0.9245	Medium	8.49	8.56	1.405	35.12	0.9321	Medium	8.49	8.56	1.42	35.489	0.9312	Medium	8.49	8.56	2.301	57.533	0.9084	Medium	8.49
R1021C	742	782	LQKVTLDIKSLSAEKYDVSSQVISQLKQKLENLQNSQLPES	12.36	5	38	12.56	12.64	18.409	48.444	0.8444	Medium	12.56	12.64	18.205	47.909	0.8341	Medium	12.56	12.64	18.266	48.067	0.8278	Medium	12.56	12.64	25.622	67.426	0.8214	Medium	12.56	12.64	25.582	67.322	0.8149	Medium	12.57	12.64	25.738	67.732	0.7963	Medium	12.56	12.64	27.143	71.429	0.8074	Medium	12.57
R1021C	748	767	DIKSLSAEKYDVSSQVISQL	11.14	3	18	11.31	11.4	13.326	74.033	0.9143	High	11.31	11.4	13.166	73.145	0.8982	Medium	11.31	11.41	13.177	73.205	0.8971	Medium	11.23	11.32	13.655	75.861	0.9043	Medium	11.24	11.32	13.655	75.863	0.9089	Medium	11.24	11.32	13.632	75.736	0.904	Medium	11.15	11.22	13.715	76.194	0.8741	Medium	11.24
R1021C	748	782	DIKSLSAEKYDVSSQVISQLKQKLENLQNSQLPES	12.56	5	32	12.61	12.69	18.149	56.717	0.9131	High	12.61	12.69	17.862	55.819	0.9022	High	12.61	12.69	17.913	55.978	0.9053	High	12.62	12.68	23.962	74.882	0.901	High	12.61	12.69	23.839	74.497	0.9055	High	12.62	12.69	24.106	75.331	0.8955	High	12.61	12.69	24.865	77.704	0.8949	High	12.62
R1021C	755	782	EKYDVSSQVISQLKQKLENLQNSQLPES	12.25	4	25	12.36	12.44	12.81	51.238	0.8736	Medium	12.36	12.44	12.583	50.334	0.8577	Medium	12.36	12.44	12.771	51.086	0.8569	Medium	12.36	12.43	18.579	74.316	0.7907	Medium	12.36	12.44	18.694	74.775	0.8121	Medium	12.36	12.44	18.818	75.271	0.8053	Medium	12.36	12.44	19.708	78.831	0.7758	Medium	12.37
R1021C	768	782	KQKLENLQNSQLPES	7.11	2	12	7.35	7.42	4.344	36.2	0.9427	High	7.34	7.42	4.359	36.328	0.9485	High	7.34	7.42	4.336	36.136	0.9476	High	7.35	7.42	7.903	65.855	0.9465	High	7.35	7.42	8.04	67.003	0.9395	High	7.35	7.42	8.03	66.915	0.9329	High	7.34	7.42	8.944	74.534	0.9373	High	7.35
R1021C	783	796	FRVPYDPGLKAGAL	10.17	3	10	10.44	10.51	0.22	2.204	0.895	High	10.44	10.51	0.132	1.324	0.9003	High	10.44	10.52	0.105	1.048	0.8985	High	10.44	10.51	0.522	5.221	0.9079	High	10.44	10.51	0.519	5.189	0.9073	High	10.44	10.52	0.548	5.483	0.9024	High	10.44	10.52	1.628	16.281	0.9017	High	10.44
R1021C	797	815	AIEKCKVMASKKKPLWLEF	10.45	2	16	10.5	10.58	1.412	8.822	0.9249	High	10.51	10.58	1.395	8.716	0.918	High	10.51	10.58	1.429	8.933	0.9174	High	10.5	10.58	2.313	14.457	0.914	High	10.5	10.59	2.34	14.627	0.9061	High	10.51	10.59	2.378	14.863	0.896	High	10.51	10.58	3.243	20.268	0.9026	High	10.51
R1021C	816	829	KCADPTALSNETIG	8.17	2	11	8.41	8.47	3.971	36.099	0.9349	High	8.4	8.47	3.951	35.921	0.9322	High	8.4	8.47	3.899	35.442	0.9381	High	8.41	8.47	6.487	58.969	0.9143	Medium	8.4	8.47	6.493	59.029	0.9101	Medium	8.4	8.47	6.543	59.484	0.9043	Medium	8.4	8.47	7.185	65.32	0.8919	Medium	8.41
R1021C	816	842	KCADPTALSNETIGIIFKHGDDLRQDM	12.04	4	24	12.1	12.23	4.267	17.777	0.8788	Medium	12.1	12.23	4.099	17.078	0.8651	Medium	12.1	12.23	4.125	17.187	0.873	Medium	12.1	12.22	7.852	32.718	0.8021	Medium	12.1	12.23	8.09	33.71	0.8582	Medium	12.1	12.23	8.021	33.422	0.8245	Medium	12.1	12.23	9.528	39.7	0.7737	Medium	12.11
R1021C	832	845	FKHGDDLRQDMLIL	9.83	4	12	9.85	9.93	0.312	2.597	0.8614	Medium	9.85	9.93	0.323	2.691	0.8696	Medium	9.85	9.93	0.327	2.721	0.8541	Medium	9.86	9.93	1.486	12.386	0.8584	Medium	9.85	9.93	1.56	13	0.8909	Medium	9.86	9.93	1.647	13.726	0.8675	Medium	9.85	9.93	2.297	19.144	0.874	Medium	9.86
R1021C	844	852	ILQILRIME	13.25	2	7	13.29	13.37	0.268	3.825	0.7169	Medium	13.29	13.37	0.112	1.599	0.8473	Medium	13.29	13.37	0.116	1.654	0.8077	Medium	13.3	13.37	0.083	1.189	0.8864	Medium	13.3	13.37	0.01	0.149	0.8554	Medium	13.29	13.37	0.2	2.855	0.8569	Medium	13.29	13.37	0.036	0.512	0.8941	Medium	13.3
R1021C	849	862	RIMESIWETESLDL	13.25	2	12	13.41	13.49	0.528	4.403	0.8055	Medium	13.41	13.49	0.551	4.595	0.8101	Medium	13.41	13.49	0.442	3.687	0.82	Medium	13.41	13.49	1.153	9.606	0.8243	Medium	13.41	13.49	1.208	10.066	0.822	Medium	13.41	13.49	1.086	9.047	0.8399	Medium	13.41	13.49	2.057	17.14	0.8157	Medium	13.41
R1021C	853	861	SIWETESLD	11.57	1	7	11.71	11.78	0.442	6.312	0.866	Medium	11.71	11.78	0.392	5.6	0.8685	Medium	11.71	11.78	0.423	6.044	0.8844	Medium	11.7	11.78	1.018	14.538	0.8673	Medium	11.7	11.79	1.064	15.198	0.8592	Medium	11.71	11.79	1.038	14.825	0.8575	Medium	11.71	11.78	1.746	24.939	0.87	Medium	11.71
R1021C	853	862	SIWETESLDL	13.36	1	8	13.54	13.61	0.426	5.324	0.8284	Medium	13.54	13.61	0.418	5.226	0.8293	Medium	13.54	13.61	0.427	5.339	0.8344	Medium	13.54	13.62	0.884	11.049	0.7648	Medium	13.54	13.61	0.917	11.459	0.8019	Medium	13.54	13.61	0.976	12.195	0.807	Medium	13.54	13.61	1.694	21.178	0.7721	Medium	13.54
R1021C	862	878	LCLLPYGCISTGDKIGM	13.08	2	14	13.21	13.28	0.39	2.785	0.9009	Medium	13.21	13.28	0.364	2.6	0.8962	Medium	13.21	13.28	0.378	2.698	0.8947	Medium	13.21	13.28	1.029	7.348	0.9002	Medium	13.21	13.28	1.005	7.182	0.902	Medium	13.21	13.28	1.07	7.643	0.902	Medium	13.21	13.28	2.072	14.802	0.8978	Medium	13.21
R1021C	863	878	CLLPYGCISTGDKIGM	12.04	2	13	12.18	12.25	0.402	3.095	0.896	Medium	12.18	12.25	0.378	2.911	0.8948	Medium	12.18	12.25	0.406	3.122	0.9067	Medium	12.17	12.25	1.105	8.504	0.9026	Medium	12.18	12.25	1.163	8.948	0.9081	Medium	12.18	12.26	1.146	8.815	0.9046	Medium	12.18	12.25	2.163	16.636	0.8976	Medium	12.18
R1021C	865	878	LPYGCISTGDKIGM	10.57	2	12	10.6	10.66	0.501	4.172	0.6858	Medium	10.6	10.67	0.43	3.583	0.6946	Medium	10.6	10.67	0.544	4.534	0.7055	Medium	10.6	10.66	1.034	8.618	0.7205	Medium	10.6	10.67	1.154	9.617	0.6929	Medium	10.6	10.67	1.089	9.077	0.7083	Medium	10.6	10.67	2.079	17.321	0.718	Medium	10.6
R1021C	879	887	IEIVKDATT	7.16	1	7	7.37	7.45	1.74	24.855	0.9	Medium	7.37	7.44	1.774	25.345	0.9042	Medium	7.37	7.44	1.794	25.635	0.9022	Medium	7.37	7.45	2.994	42.774	0.9089	Medium	7.37	7.45	3.122	44.604	0.9047	Medium	7.37	7.45	3.087	44.097	0.9032	Medium	7.37	7.44	3.705	52.923	0.8984	Medium	7.37
R1021C	888	901	IAKIQQSTVGNTGA	6.15	2	12	6.34	6.41	6.139	51.161	0.9238	Medium	6.33	6.41	6.106	50.879	0.9251	High	6.34	6.41	6.072	50.597	0.9154	High	6.34	6.41	6.729	56.078	0.9071	Medium	6.33	6.41	6.746	56.215	0.9047	Medium	6.34	6.42	6.615	55.129	0.8979	Medium	6.33	6.41	7.367	61.389	0.8971	Medium	6.34
R1021C	902	910	FKDEVLNHW	10.1	3	7	10.29	10.36	0.152	2.172	0.902	High	10.29	10.36	0.153	2.185	0.8407	Medium	10.29	10.37	0.202	2.88	0.8669	Medium	10.29	10.37	0.304	4.336	0.8667	High	10.29	10.36	0.253	3.608	0.9034	High	10.29	10.37	0.346	4.948	0.8515	High	10.29	10.36	0.912	13.026	0.8471	Medium	10.29
R1021C	908	924	NHWLKEKSPTEEKFQAA	7.08	3	14	7.28	7.36	1.612	11.515	0.763	Medium	7.28	7.36	1.345	9.608	0.7163	Medium	7.28	7.36	1.456	10.399	0.7657	Medium	7.28	7.36	2.508	17.915	0.7774	Medium	7.28	7.36	2.746	19.613	0.8187	Medium	7.28	7.36	2.643	18.878	0.7823	Medium	7.27	7.36	3.546	25.33	0.7832	Medium	7.28
R1021C	927	934	RFVYSCAG	8.29	2	6	8.61	8.7	0.104	1.727	0.882	Medium	8.6	8.69	0.062	1.033	0.8799	Medium	8.6	8.69	0.067	1.115	0.8711	Medium	8.61	8.7	0.066	1.105	0.8197	Medium	8.6	8.7	0.129	2.148	0.8721	Medium	8.61	8.7	0.111	1.849	0.8192	Medium	8.6	8.7	0.154	2.571	0.8271	Medium	8.61
R1021C	935	939	YCVAT	6.89	1	3	7.14	7.21	0.049	1.63	0.9032	Medium	7.13	7.21	0.02	0.666	0.904	Medium	7.13	7.21	0.033	1.116	0.9005	Medium	7.14	7.21	0.054	1.807	0.915	High	7.14	7.21	0.047	1.575	0.9035	Medium	7.14	7.21	0.062	2.066	0.9053	High	7.13	7.21	0.035	1.152	0.9064	High	7.14
R1021C	940	953	FVLGIGDRHNDNIM	10.61	2	12	10.82	10.9	0.168	1.396	0.8958	Medium	10.83	10.9	0.139	1.162	0.8946	Medium	10.83	10.9	0.219	1.824	0.8961	Medium	10.82	10.9	0.448	3.731	0.8897	Medium	10.83	10.9	0.451	3.755	0.904	Medium	10.83	10.9	0.411	3.427	0.8932	Medium	10.83	10.9	1.05	8.747	0.8939	Medium	10.83
R1021C	954	960	ITETGNL	7.64	1	5	7.83	7.9	0.208	4.166	0.8826	Medium	7.82	7.9	0.225	4.502	0.8866	Medium	7.82	7.9	0.204	4.081	0.894	Medium	7.83	7.9	0.914	18.279	0.9019	Medium	7.82	7.9	0.979	19.585	0.8818	Medium	7.83	7.9	0.951	19.025	0.8993	Medium	7.83	7.9	1.393	27.857	0.9097	Medium	7.83
R1021C	954	961	ITETGNLF	11.35	1	6	11.48	11.55	0.395	6.58	0.7772	Medium	11.48	11.55	0.253	4.211	0.774	Medium	11.48	11.55	0.371	6.178	0.8007	Medium	11.48	11.54	0.858	14.296	0.7318	Medium	11.48	11.55	0.932	15.534	0.7531	Medium	11.48	11.55	0.843	14.052	0.7684	Medium	11.48	11.55	1.153	19.223	0.7443	Medium	11.48
R1021C	954	976	ITETGNLFHIDFGHILGNYKSFL	13.82	4	21	14	14.07	6.523	31.061	0.7533	Medium	14	14.07	6.224	29.637	0.7467	Medium	14	14.07	6.436	30.647	0.7521	Medium	14	14.08	7.124	33.922	0.7532	Medium	14	14.07	6.844	32.591	0.7677	Medium	14	14.07	7.262	34.58	0.7587	Medium	14	14.07	7.107	33.842	0.7506	Medium	14
R1021C	961	972	FHIDFGHILGNY	12.72	3	10	12.89	12.97	3.365	33.648	0.9351	High	12.89	12.97	3.334	33.336	0.926	High	12.89	12.97	3.387	33.869	0.9244	High	12.89	12.97	3.849	38.489	0.9111	High	12.89	12.96	3.904	39.041	0.9292	High	12.89	12.97	3.886	38.858	0.9359	High	12.89	12.97	3.998	39.982	0.9237	High	12.89
R1021C	961	976	FHIDFGHILGNYKSFL	13.36	4	14	13.49	13.57	6.61	47.211	0.9207	High	13.49	13.57	6.527	46.622	0.9285	High	13.49	13.57	6.564	46.887	0.9214	High	13.5	13.57	7.02	50.142	0.9278	High	13.5	13.57	6.866	49.042	0.9311	High	13.5	13.57	6.981	49.867	0.9338	High	13.49	13.57	7.104	50.743	0.9303	High	13.5
R1021C	962	975	HIDFGHILGNYKSF	11.42	4	12	11.53	11.6	5.138	42.817	0.896	High	11.53	11.61	5.045	42.04	0.8818	High	11.53	11.61	5.101	42.51	0.8954	High	11.53	11.6	5.733	47.771	0.8778	Medium	11.53	11.6	5.726	47.714	0.8867	High	11.53	11.61	5.716	47.631	0.8781	High	11.53	11.61	5.844	48.704	0.8657	Medium	11.54
R1021C	973	992	KSFLGINKERVPFVLTPDFL	12.87	4	16	12.86	12.93	3.623	22.641	0.914	High	12.86	12.93	3.567	22.294	0.9038	High	12.86	12.93	3.556	22.228	0.9107	High	12.86	12.94	4.218	26.362	0.897	High	12.85	12.93	4.285	26.783	0.9117	High	12.86	12.93	4.323	27.018	0.907	High	12.86	12.93	5.015	31.345	0.8965	High	12.86
R1021C	976	992	LGINKERVPFVLTPDFL	13.24	3	13	13.23	13.31	2.278	17.523	0.9228	High	13.23	13.31	2.218	17.061	0.9114	High	13.23	13.31	2.234	17.184	0.9217	High	13.23	13.31	2.876	22.121	0.9163	High	13.23	13.31	2.906	22.357	0.9222	High	13.23	13.31	2.934	22.571	0.915	High	13.23	13.31	3.66	28.153	0.9007	High	13.23
R1021C	977	992	GINKERVPFVLTPDFL	12.98	3	12	13.13	13.22	1.574	13.118	0.9376	High	13.13	13.22	1.551	12.929	0.9397	High	13.13	13.22	1.593	13.278	0.937	High	13.14	13.22	2.232	18.601	0.93	High	13.14	13.22	2.304	19.203	0.933	High	13.14	13.22	2.304	19.201	0.9277	High	13.13	13.22	2.976	24.803	0.9207	High	13.14
R1021C	980	992	KERVPFVLTPDFL	12.82	3	9	12.99	13.07	0.42	4.67	0.8273	Medium	12.99	13.07	0.487	5.415	0.7961	Medium	12.99	13.07	0.441	4.905	0.817	Medium	13	13.07	1.029	11.439	0.7952	Medium	12.99	13.07	1.022	11.353	0.7934	Medium	12.99	13.07	1.161	12.903	0.7941	Medium	12.99	13.07	1.75	19.443	0.8043	Medium	12.99
R1021C	993	1014	FVMGTSGKKTSPHFQKFQDICV	9.54	2	19	9.68	9.76	1.15	6.051	0.7692	Medium	9.68	9.76	1.042	5.483	0.7751	Medium	9.69	9.76	1.054	5.548	0.7642	Medium	9.69	9.77	1.372	7.221	0.6981	Medium	9.69	9.76	1.278	6.725	0.75	Medium	9.69	9.76	1.494	7.865	0.7179	Medium	9.69	9.76	1.933	10.173	0.7152	Medium	9.69
R1021C	1035	1050	LMTGMPQLTSKEDIEY	10.99	2	13	11.08	11.15	4.789	36.84	0.7497	Medium	11.08	11.15	4.587	35.282	0.757	Medium	11.08	11.15	4.616	35.507	0.7521	Medium	11.07	11.15	6.901	53.084	0.7371	Medium	11.08	11.15	6.963	53.56	0.7641	Medium	11.06	11.12	6.891	53.006	0.7079	Medium	11.08	11.15	8.327	64.051	0.7257	Medium	11.15
R1021C	1050	1071	YIRDALTVGKNEEDAKKYFLDQ	9.85	4	20	9.99	10.06	2.408	12.042	0.7785	Medium	9.99	10.06	2.553	12.763	0.7849	Medium	10	10.06	2.449	12.246	0.7695	Medium	10	10.06	4.435	22.173	0.7122	Medium	10	10.06	4.406	22.03	0.7508	Medium	10	10.07	4.511	22.554	0.7209	Medium	10	10.06	7.944	39.721	0.6876	Medium	10
R1021C	1051	1071	IRDALTVGKNEEDAKKYFLDQ	9.48	3	19	9.51	9.58	3.03	15.95	0.7361	Medium	9.51	9.58	2.762	14.536	0.7755	Medium	9.51	9.58	2.785	14.656	0.7639	Medium	9.56	9.62	4.47	23.526	0.7035	Medium	9.56	9.64	4.765	25.081	0.7372	Medium	9.51	9.59	4.62	24.316	0.7404	Medium	9.51	9.58	8.023	42.224	0.7182	Medium	9.51
R1021C	1051	1073	IRDALTVGKNEEDAKKYFLDQIE	10.45	4	21	10.57	10.65	2.557	12.176	0.8389	Medium	10.57	10.65	2.892	13.77	0.8552	Medium	10.58	10.65	2.571	12.243	0.8306	Medium	10.57	10.65	4.747	22.603	0.8164	Medium	10.57	10.65	4.728	22.512	0.8289	Medium	10.58	10.65	4.477	21.319	0.788	Medium	10.57	10.65	8.48	40.382	0.8119	Medium	10.58
R1021C	1072	1084	IEVCRDKGWTVQF	11.18	3	11	11.32	11.41	1.428	12.98	0.8739	Medium	11.32	11.41	1.473	13.391	0.8759	Medium	11.32	11.41	1.462	13.293	0.8818	Medium	11.32	11.41	4.639	42.172	0.8414	Medium	11.32	11.41	4.695	42.686	0.861	Medium	11.32	11.42	4.774	43.4	0.8669	Medium	11.32	11.41	6	54.548	0.8645	Medium	11.33
R1021C	1085	1092	NWFLHLVL	14.19	2	6	14.39	14.47	1.447	24.116	0.9285	High	14.39	14.47	1.453	24.219	0.9251	High	14.39	14.47	1.493	24.876	0.9207	High	14.4	14.47	4.227	70.454	0.9195	Medium	14.39	14.47	4.22	70.337	0.9201	High	14.39	14.47	4.32	72.003	0.9043	High	14.39	14.47	4.465	74.417	0.9272	High	14.39
R1021C	1088	1092	LHLVL	11.09	2	3	11.13	11.2	1.15	38.345	0.9013	High	11.15	11.22	1.181	39.368	0.897	High	11.15	11.22	1.165	38.818	0.9052	High	11.15	11.22	2.514	83.792	0.9145	High	11.18	11.25	2.508	83.611	0.9065	High	11.16	11.22	2.519	83.981	0.9168	High	11.09	11.16	2.579	85.956	0.9255	High	11.13
R1021C	1091	1102	VLGIKQGEKHSA	5.16	3	10	5.31	5.37	5.001	50.015	0.8794	Medium	5.3	5.37	5.02	50.204	0.8931	Medium	5.3	5.37	4.968	49.684	0.8799	Medium	5.3	5.37	4.999	49.994	0.868	Medium	5.3	5.37	5.06	50.596	0.8705	Medium	5.3	5.37	4.829	48.288	0.865	Medium	5.3	5.37	4.92	49.199	0.8637	Medium	5.3
R1021C	1093	1102	GIKQGEKHSA	3.38	1	8	3.52	3.59	3.99	49.878	0.8536	Medium	3.48	3.55	3.889	48.612	0.8156	Medium	3.48	3.55	3.736	46.699	0.8096	Medium	3.44	3.51	3.943	49.292	0.8142	Medium	3.46	3.53	3.826	47.819	0.8593	Medium	3.43	3.49	3.934	49.18	0.8218	Medium	3.41	3.48	3.949	49.36	0.8277	Medium	3.44
R1021P	4	12	ENYKQPVVL	9.05	2	6	9.23	9.31	4.968	82.795	0.7803	Medium	9.23	9.31	4.833	80.546	0.7834	Medium	9.23	9.31	4.908	81.798	0.7885	Medium	9.23	9.31	4.963	82.715	0.7642	Medium	9.28	9.35	4.982	83.029	0.7157	Medium	9.22	9.29	4.995	83.245	0.7648	Medium	9.15	9.22	5.13	85.498	0.7928	Medium	9.23
R1021P	13	32	REDNCRRRRRMKPRSAAASL	3.92	5	17	4.2	4.3	6.896	40.564	0.9578	High	4.14	4.21	6.84	40.234	0.9566	High	4.19	4.3	6.667	39.217	0.9561	High	4.19	4.29	7.137	41.981	0.9552	High	4.2	4.3	7.108	41.811	0.9498	High	4.13	4.19	7.012	41.249	0.9525	High	4.19	4.29	7.192	42.307	0.954	High	4.19
R1021P	35	41	MELIPIE	12.27	2	4	12.41	12.51	0.754	18.853	0.6939	Medium	12.41	12.5	0.789	19.721	0.6615	Medium	12.41	12.5	0.84	20.988	0.6575	Medium	12.42	12.51	1.066	26.647	0.6993	Medium	12.37	12.44	1.043	26.073	0.6723	Medium	12.41	12.5	1.036	25.9	0.6993	Medium	12.41	12.5	1.262	31.538	0.6973	Medium	12.47
R1021P	36	41	ELIPIE	10.66	1	3	10.88	10.98	0.035	1.171	0.7877	Medium	10.88	10.98	0.029	0.978	0.7909	Medium	10.88	10.98	0.012	0.385	0.7932	Medium	10.87	10.97	0.063	2.085	0.7948	Medium	10.87	10.97	0.055	1.846	0.7969	Medium	10.87	10.97	0.037	1.223	0.7943	Medium	10.87	10.98	0.297	9.895	0.7985	Medium	10.87
R1021P	38	58	IPIEFVLPTSQRKCKSPETAL	10.57	4	17	10.57	10.66	3.645	21.439	0.6328	Medium	10.57	10.66	3.672	21.597	0.5858	Medium	10.57	10.66	3.627	21.337	0.5913	Medium	10.56	10.66	4.596	27.038	0.6819	Medium	10.57	10.65	4.39	25.825	0.647	Medium	10.56	10.66	4.496	26.449	0.6479	Medium	10.61	10.68	5.407	31.806	0.6345	Medium	10.6
R1021P	42	58	FVLPTSQRKCKSPETAL	8.39	2	13	8.51	8.6	4	30.773	0.895	Medium	8.51	8.6	3.713	28.561	0.8992	Medium	8.51	8.6	3.902	30.017	0.8823	Medium	8.51	8.6	5.378	41.368	0.9067	High	8.51	8.61	5.252	40.401	0.8985	High	8.51	8.6	5.218	40.136	0.8905	Medium	8.51	8.6	6.003	46.176	0.8992	High	8.51
R1021P	42	59	FVLPTSQRKCKSPETALL	9.43	3	14	9.63	9.72	3.601	25.721	0.9052	Medium	9.63	9.72	3.615	25.82	0.906	Medium	9.63	9.72	3.614	25.814	0.9055	Medium	9.62	9.72	4.698	33.56	0.898	Medium	9.63	9.72	4.771	34.076	0.9013	Medium	9.62	9.72	4.648	33.201	0.8954	Medium	9.62	9.72	5.445	38.895	0.9013	Medium	9.62
R1021P	59	70	LHVAGHGNVEQM	6.68	3	10	6.78	6.87	0.488	4.884	0.8657	Medium	6.78	6.87	0.382	3.817	0.8795	Medium	6.78	6.87	0.497	4.972	0.8809	Medium	6.78	6.87	1.195	11.947	0.8971	Medium	6.78	6.88	1.216	12.162	0.871	Medium	6.78	6.87	1.184	11.836	0.8863	Medium	6.78	6.87	1.681	16.813	0.886	Medium	6.78
R1021P	59	72	LHVAGHGNVEQMKA	5.97	2	12	6.11	6.2	0.424	3.532	0.7224	Medium	6.11	6.2	0.322	2.679	0.7591	Medium	6.11	6.2	0.51	4.252	0.7448	Medium	6.11	6.2	1.124	9.367	0.8043	Medium	6.11	6.2	1.08	9	0.778	Medium	6.11	6.2	1.16	9.669	0.7589	Medium	6.11	6.2	1.488	12.398	0.7676	Medium	6.11
R1021P	60	75	HVAGHGNVEQMKAQVW	8.28	3	14	8.41	8.5	0.276	1.968	0.8895	High	8.41	8.5	0.262	1.873	0.8836	High	8.41	8.5	0.309	2.21	0.8656	Medium	8.41	8.5	0.637	4.549	0.8979	High	8.41	8.51	0.623	4.452	0.9007	High	8.41	8.5	0.584	4.17	0.8963	Medium	8.41	8.5	0.888	6.342	0.8948	High	8.41
R1021P	79	84	LETSVA	6.26	1	4	6.48	6.57	2.214	55.343	0.907	Medium	6.48	6.57	2.141	53.532	0.9043	Medium	6.48	6.57	2.188	54.692	0.9087	Medium	6.48	6.57	3.154	78.853	0.9163	Medium	6.64	6.72	3.113	77.833	0.7395	Medium	6.48	6.57	3.153	78.823	0.9003	Medium	6.48	6.57	3.381	84.536	0.9121	Medium	6.62
R1021P	79	86	LETSVAAD	6.15	1	6	6.37	6.47	3.38	56.331	0.9148	Medium	6.37	6.47	3.235	53.921	0.911	Medium	6.37	6.47	3.279	54.656	0.9108	Medium	6.37	6.47	4.438	73.968	0.9185	High	6.46	6.53	4.466	74.432	0.8936	Medium	6.37	6.47	4.395	73.251	0.9088	High	6.37	6.47	4.696	78.275	0.9134	High	6.37
R1021P	85	99	ADFYHRLGPHHFLLL	11.31	4	12	11.45	11.52	0.481	4.008	0.7801	Medium	11.45	11.52	0.534	4.451	0.7742	Medium	11.45	11.52	0.444	3.699	0.7447	Medium	11.44	11.52	1.406	11.713	0.7774	Medium	11.44	11.52	1.406	11.714	0.7259	Medium	11.44	11.52	1.38	11.502	0.7482	Medium	11.45	11.52	1.749	14.572	0.7449	Medium	11.44
R1021P	87	99	FYHRLGPHHFLLL	10.45	2	10	10.51	10.58	0.283	2.828	0.8634	Medium	10.51	10.58	0.293	2.933	0.8581	Medium	10.51	10.58	0.351	3.51	0.8575	Medium	10.5	10.58	0.642	6.423	0.8652	Medium	10.51	10.59	0.62	6.198	0.8652	Medium	10.5	10.58	0.713	7.125	0.8475	Medium	10.51	10.58	0.766	7.661	0.8601	Medium	10.5
R1021P	88	98	YHRLGPHHFLL	8.5	3	8	8.59	8.67	0.45	5.622	0.7245	Medium	8.59	8.67	0.381	4.76	0.6961	Medium	8.59	8.67	0.494	6.174	0.614	Medium	8.59	8.67	0.915	11.439	0.7758	Medium	8.6	8.67	0.756	9.452	0.7383	Medium	8.59	8.67	0.88	10.997	0.771	Medium	8.59	8.67	0.969	12.106	0.7796	Medium	8.59
R1021P	100	106	YQKKGQW	6.04	2	5	6.26	6.33	1.633	32.662	0.9245	High	6.26	6.34	1.617	32.344	0.9232	High	6.26	6.34	1.59	31.795	0.9252	High	6.26	6.33	2.817	56.345	0.9196	High	6.26	6.33	2.894	57.875	0.9216	High	6.11	6.18	2.848	56.961	0.8369	Medium	6.26	6.33	2.953	59.056	0.9258	High	6.26
R1021P	107	118	YEIYDKYQVVQT	9.59	2	10	9.53	9.61	1.199	11.991	0.7507	Medium	9.53	9.61	1.042	10.421	0.7556	Medium	9.53	9.61	1.115	11.15	0.7382	Medium	9.53	9.61	2.203	22.035	0.7464	Medium	9.54	9.61	2.37	23.702	0.7373	Medium	9.53	9.61	2.187	21.869	0.7511	Medium	9.53	9.61	3.185	31.851	0.7287	Medium	9.53
R1021P	114	121	QVVQTLDC	8.83	1	6	9.02	9.1	1.09	18.168	0.8411	Medium	9.02	9.1	1.075	17.918	0.842	Medium	9.02	9.1	1.073	17.877	0.8358	Medium	9.02	9.1	1.425	23.754	0.8629	Medium	9.03	9.1	1.488	24.796	0.845	Medium	9.02	9.1	1.427	23.785	0.8545	Medium	9.02	9.1	1.531	25.51	0.8478	Medium	9.02
R1021P	122	137	LRYWKATHRSPGQIHL	7.53	4	13	7.71	7.79	0.41	3.154	0.9037	Medium	7.71	7.79	0.372	2.86	0.9079	Medium	7.71	7.79	0.438	3.367	0.9061	Medium	7.71	7.79	1.402	10.781	0.9082	Medium	7.72	7.79	1.402	10.787	0.8985	Medium	7.71	7.79	1.369	10.531	0.9053	Medium	7.71	7.79	2.236	17.197	0.9059	Medium	7.71
R1021P	122	149	LRYWKATHRSPGQIHLVQRHPPSEESQA	6.41	5	23	6.6	6.68	2.133	9.276	0.9449	High	6.61	6.68	1.985	8.629	0.9472	High	6.6	6.68	1.996	8.676	0.9456	High	6.6	6.68	4.388	19.08	0.9413	High	6.61	6.68	4.319	18.777	0.9432	High	6.6	6.68	4.212	18.315	0.9401	High	6.6	6.68	5.528	24.034	0.9402	High	6.6
R1021P	122	157	LRYWKATHRSPGQIHLVQRHPPSEESQAFQRQLTAL	8.72	5	31	8.73	8.8	1.855	5.985	0.8591	Medium	8.73	8.8	1.725	5.565	0.8653	Medium	8.73	8.8	1.704	5.495	0.8428	Medium	8.73	8.8	4.558	14.704	0.8796	Medium	8.73	8.81	4.513	14.557	0.8749	Medium	8.73	8.8	4.259	13.737	0.8757	Medium	8.73	8.8	6.282	20.264	0.8771	Medium	8.73
R1021P	125	157	WKATHRSPGQIHLVQRHPPSEESQAFQRQLTAL	8.68	5	28	8.74	8.81	1.596	5.7	0.7174	Medium	8.74	8.81	1.825	6.519	0.722	Medium	8.74	8.81	1.54	5.499	0.6645	Medium	8.73	8.81	4.251	15.184	0.7564	Medium	8.74	8.82	4.384	15.656	0.7185	Medium	8.73	8.81	4.185	14.945	0.7178	Medium	8.73	8.81	5.923	21.153	0.7462	Medium	8.73
R1021P	138	157	VQRHPPSEESQAFQRQLTAL	9.74	4	16	9.92	9.99	1.61	10.062	0.8345	Medium	9.92	9.99	1.568	9.803	0.8373	Medium	9.92	9.99	1.796	11.227	0.8024	Medium	9.92	9.98	3.41	21.314	0.8008	Medium	9.92	9.99	3.647	22.792	0.8095	Medium	9.92	9.98	3.455	21.592	0.7994	Medium	9.92	9.98	4.765	29.779	0.795	Medium	9.92
R1021P	150	157	FQRQLTAL	9.15	2	6	9.32	9.39	0.143	2.381	0.8821	Medium	9.32	9.39	0.162	2.695	0.8859	Medium	9.32	9.39	0.194	3.226	0.8785	Medium	9.32	9.39	0.365	6.091	0.8856	Medium	9.33	9.4	0.37	6.159	0.8785	Medium	9.32	9.39	0.369	6.152	0.8965	Medium	9.32	9.39	0.982	16.368	0.8881	Medium	9.32
R1021P	151	157	QRQLTAL	8.12	2	5	8.32	8.39	0.201	4.019	0.9167	Medium	8.32	8.39	0.135	2.691	0.8866	Medium	8.32	8.39	0.129	2.585	0.9011	Medium	8.31	8.39	0.358	7.161	0.8791	Medium	8.32	8.4	0.371	7.416	0.9018	Medium	8.32	8.39	0.326	6.521	0.8984	Medium	8.32	8.39	0.946	18.917	0.8637	Medium	8.31
R1021P	158	164	IGYDVTD	8.23	1	5	8.43	8.51	0.687	13.73	0.9055	Medium	8.44	8.51	0.677	13.531	0.8993	Medium	8.43	8.51	0.71	14.196	0.897	Medium	8.43	8.51	1.367	27.33	0.9061	Medium	8.44	8.51	1.401	28.016	0.9057	Medium	8.43	8.51	1.342	26.845	0.8946	Medium	8.43	8.51	2.349	46.989	0.899	Medium	8.43
R1021P	158	173	IGYDVTDVSNVHDDEL	10.34	2	14	10.54	10.62	3.456	24.684	0.8894	Medium	10.54	10.62	3.34	23.856	0.8958	Medium	10.54	10.62	3.371	24.075	0.8714	Medium	10.54	10.61	5.104	36.459	0.8726	Medium	10.55	10.62	5.093	36.377	0.8648	Medium	10.54	10.61	4.979	35.568	0.8602	Medium	10.54	10.61	6.132	43.802	0.8663	Medium	10.54
R1021P	158	174	IGYDVTDVSNVHDDELE	9.9	2	15	10.08	10.15	3.497	23.316	0.9132	Medium	10.08	10.15	3.348	22.317	0.9208	Medium	10.08	10.15	3.425	22.834	0.908	Medium	10.08	10.14	5.09	33.934	0.9071	Medium	10.08	10.15	5.12	34.131	0.9071	Medium	10.08	10.14	4.979	33.195	0.9135	Medium	10.08	10.14	6.271	41.807	0.8952	Medium	10.08
R1021P	165	175	VSNVHDDELEF	10.56	2	9	10.69	10.77	1.429	15.879	0.7507	Medium	10.69	10.77	1.429	15.878	0.7272	Medium	10.69	10.77	1.363	15.149	0.7355	Medium	10.69	10.76	2.439	27.103	0.7645	Medium	10.69	10.76	2.428	26.975	0.7325	Medium	10.69	10.77	2.379	26.435	0.7347	Medium	10.69	10.77	2.712	30.128	0.7592	Medium	10.69
R1021P	174	182	EFTRRGLVT	7	2	7	7.34	7.42	0.158	2.261	0.8842	Medium	7.34	7.42	0.117	1.665	0.8743	Medium	7.34	7.42	0.095	1.361	0.8695	Medium	7.34	7.42	0.266	3.806	0.8619	Medium	7.35	7.42	0.249	3.553	0.8703	Medium	7.34	7.42	0.238	3.398	0.8554	Medium	7.34	7.42	0.609	8.697	0.8201	Medium	7.34
R1021P	174	195	EFTRRGLVTPRMAEVASRDPKL	8.28	5	18	8.32	8.4	1.003	5.57	0.8476	Medium	8.32	8.4	0.952	5.292	0.8592	Medium	8.32	8.4	0.899	4.995	0.8155	Medium	8.31	8.4	2.007	11.15	0.8869	Medium	8.32	8.4	1.996	11.091	0.8707	Medium	8.32	8.4	1.921	10.672	0.8744	Medium	8.32	8.4	3.292	18.287	0.8886	Medium	8.31
R1021P	175	182	FTRRGLVT	6.2	2	6	6.36	6.43	0.067	1.119	0.842	Medium	6.36	6.44	0.105	1.747	0.8479	Medium	6.36	6.44	0.117	1.945	0.8343	Medium	6.36	6.44	0.225	3.755	0.9176	Medium	6.36	6.44	0.25	4.163	0.8873	Medium	6.36	6.44	0.229	3.811	0.8942	Medium	6.36	6.44	0.665	11.08	0.899	Medium	6.36
R1021P	175	187	FTRRGLVTPRMAE	7.17	3	10	7.27	7.34	0.143	1.426	0.7444	Medium	7.27	7.34	0.15	1.505	0.7436	Medium	7.27	7.34	0.095	0.952	0.729	Medium	7.27	7.34	0.283	2.834	0.8144	Medium	7.27	7.35	0.26	2.596	0.7462	Medium	7.27	7.34	0.264	2.642	0.7916	Medium	7.27	7.34	0.912	9.125	0.827	Medium	7.27
R1021P	183	195	PRMAEVASRDPKL	6.78	3	10	7.07	7.15	1.049	10.488	0.8731	Medium	7.08	7.15	1.128	11.284	0.8771	Medium	7.07	7.15	1.07	10.697	0.8705	Medium	7.07	7.15	1.9	19	0.8503	Medium	7.08	7.15	1.874	18.744	0.8786	Medium	7.07	7.15	1.843	18.43	0.8655	Medium	7.07	7.15	2.945	29.454	0.8589	Medium	7.12
R1021P	186	195	AEVASRDPKL	5.99	2	7	6.35	6.43	1.072	15.319	0.9182	Medium	6.35	6.43	0.991	14.161	0.9175	Medium	6.35	6.43	0.994	14.198	0.9239	Medium	6.35	6.43	1.797	25.671	0.9024	Medium	6.35	6.43	1.826	26.079	0.9234	Medium	6.35	6.43	1.732	24.743	0.9061	Medium	6.26	6.33	2.643	37.76	0.9012	High	6.28
R1021P	188	195	VASRDPKL	5.31	2	5	5.61	5.68	1.063	21.264	0.8872	Medium	5.61	5.68	1.009	20.179	0.8871	Medium	5.61	5.68	1.029	20.579	0.8798	Medium	5.61	5.68	1.767	35.337	0.9069	Medium	5.62	5.68	1.734	34.679	0.9164	Medium	5.61	5.68	1.7	34.008	0.9145	Medium	5.56	5.64	2.261	45.216	0.8294	Medium	5.59
R1021P	196	211	YAMHPWVTSKPLPEYL	11.83	3	11	11.98	12.06	3.192	29.021	0.8954	High	11.98	12.06	3.087	28.062	0.8994	High	11.98	12.06	3.154	28.673	0.9006	High	11.97	12.06	4.569	41.537	0.8983	High	11.97	12.06	4.732	43.02	0.9002	High	11.97	12.06	4.516	41.058	0.8991	High	11.97	12.06	5.701	51.823	0.894	High	11.98
R1021P	212	221	WKKIANNCIF	10.5	1	8	10.64	10.72	2.057	25.714	0.8872	Medium	10.64	10.72	1.915	23.942	0.9009	Medium	10.64	10.72	1.964	24.549	0.9	Medium	10.64	10.71	3.701	46.265	0.8495	Medium	10.64	10.71	3.773	47.16	0.8629	Medium	10.64	10.71	3.615	45.188	0.8548	Medium	10.64	10.72	4.41	55.126	0.8428	Medium	10.64
R1021P	222	232	IVIHRSTTSQT	4.69	2	9	4.83	4.91	2.852	31.688	0.9157	Medium	4.83	4.91	2.757	30.636	0.9135	Medium	4.83	4.91	2.813	31.261	0.9191	Medium	4.83	4.91	3.105	34.496	0.9316	Medium	4.86	4.93	3.137	34.856	0.9259	Medium	4.82	4.9	2.984	33.16	0.9121	Medium	4.83	4.91	3.44	38.221	0.9294	Medium	4.83
R1021P	222	245	IVIHRSTTSQTIKVSPDDTPGAIL	9.09	4	20	9.27	9.35	2.253	11.265	0.9153	High	9.27	9.35	2.133	10.667	0.913	High	9.27	9.35	2.162	10.808	0.9193	High	9.27	9.35	3.437	17.185	0.9064	High	9.28	9.35	3.244	16.222	0.9127	High	9.27	9.35	3.297	16.487	0.9147	High	9.27	9.35	4.254	21.271	0.9094	High	9.27
R1021P	233	245	IKVSPDDTPGAIL	9.96	2	9	10.18	10.26	0.818	9.087	0.866	Medium	10.18	10.26	0.807	8.962	0.8797	Medium	10.18	10.26	0.862	9.575	0.8813	Medium	10.18	10.25	1.21	13.448	0.8794	Medium	10.18	10.25	1.201	13.346	0.8822	Medium	10.18	10.25	1.169	12.985	0.884	Medium	10.18	10.25	1.91	21.227	0.8663	Medium	10.18
R1021P	249	269	FTKMAKKKSLMDIPESQSEQD	7.32	2	18	7.53	7.6	9.255	51.415	0.9068	High	7.53	7.6	8.88	49.334	0.9071	High	7.53	7.6	8.916	49.531	0.9051	High	7.53	7.6	9.854	54.746	0.9161	High	7.53	7.61	9.745	54.141	0.9097	High	7.53	7.6	9.517	52.874	0.901	High	7.53	7.6	9.912	55.066	0.9148	High	7.53
R1021P	270	280	FVLRVCGRDEY	9.76	3	9	9.87	9.94	0.557	6.187	0.7297	Medium	9.87	9.94	0.574	6.373	0.7417	Medium	9.87	9.94	0.535	5.943	0.7257	Medium	9.87	9.93	0.65	7.217	0.7731	Medium	9.87	9.94	0.504	5.595	0.7314	Medium	9.87	9.93	0.651	7.234	0.7379	Medium	9.87	9.93	0.827	9.187	0.7289	Medium	9.87
R1021P	270	281	FVLRVCGRDEYL	11.19	3	10	11.29	11.37	0.487	4.872	0.9088	High	11.29	11.37	0.518	5.18	0.8914	High	11.29	11.37	0.524	5.238	0.8998	High	11.28	11.37	0.618	6.183	0.9266	High	11.28	11.37	0.659	6.593	0.923	High	11.29	11.37	0.619	6.193	0.9138	High	11.29	11.37	0.918	9.185	0.93	High	11.28
R1021P	282	291	VGETPIKNFQ	8.12	2	7	8.23	8.31	0.676	9.658	0.8483	Medium	8.23	8.31	0.652	9.32	0.8601	Medium	8.23	8.31	0.62	8.857	0.8492	Medium	8.23	8.31	0.592	8.46	0.8789	Medium	8.24	8.31	0.557	7.962	0.8594	Medium	8.23	8.31	0.599	8.558	0.8578	Medium	8.23	8.31	0.758	10.835	0.8677	Medium	8.23
R1021P	282	307	VGETPIKNFQWVRHCLKNGEEIHVVL	11.35	4	23	11.36	11.43	1.254	5.452	0.8767	Medium	11.36	11.43	1.116	4.851	0.8619	Medium	11.36	11.43	1.144	4.976	0.8625	Medium	11.36	11.43	3.577	15.553	0.8912	Medium	11.36	11.43	3.683	16.014	0.8875	Medium	11.36	11.43	3.567	15.51	0.892	Medium	11.36	11.43	4.179	18.171	0.8923	Medium	11.36
R1021P	292	307	WVRHCLKNGEEIHVVL	8.82	4	14	8.92	9	0.707	5.048	0.8361	Medium	8.92	9	0.638	4.555	0.836	Medium	8.92	9	0.752	5.371	0.8106	Medium	8.92	8.99	2.685	19.177	0.8614	Medium	8.93	9	2.672	19.083	0.8349	Medium	8.92	9	2.659	18.995	0.8584	Medium	8.92	8.99	3.046	21.756	0.8558	Medium	8.92
R1021P	303	315	IHVVLDTPPDPAL	10.29	2	8	10.6	10.68	0.83	10.374	0.6927	Medium	10.6	10.68	0.518	6.475	0.688	Medium	10.6	10.68	0.571	7.141	0.6822	Medium	10.6	10.67	1.628	20.345	0.6964	Medium	10.6	10.67	1.721	21.515	0.7042	Medium	10.6	10.67	1.567	19.584	0.701	Medium	10.6	10.67	2.251	28.143	0.6969	Medium	10.6
R1021P	308	315	DTPPDPAL	8.44	1	3	8.66	8.75	0.557	18.574	0.8884	Medium	8.66	8.75	0.475	15.822	0.8775	Medium	8.66	8.75	0.534	17.809	0.8772	Medium	8.66	8.74	1.174	39.15	0.8784	Medium	8.66	8.75	1.199	39.962	0.8801	Medium	8.66	8.74	1.19	39.671	0.8781	Medium	8.66	8.74	1.531	51.028	0.8716	Medium	8.66
R1021P	316	335	DEVRKEEWPLVDDCTGVTGY	12.57	3	17	12.66	12.73	6.407	37.691	0.835	Medium	12.66	12.73	6.343	37.313	0.8209	Medium	12.66	12.73	6.421	37.77	0.8412	Medium	12.66	12.73	7.472	43.951	0.8336	Medium	12.65	12.73	7.672	45.132	0.8353	Medium	12.65	12.73	7.502	44.128	0.814	Medium	12.65	12.73	8.086	47.567	0.8145	Medium	12.66
R1021P	316	339	DEVRKEEWPLVDDCTGVTGYHEQL	11.93	4	21	11.99	12.06	7.238	34.467	0.8498	Medium	11.98	12.06	7.02	33.429	0.8322	Medium	11.98	12.06	7.193	34.253	0.8433	Medium	11.98	12.06	8.649	41.184	0.8571	Medium	11.98	12.06	8.775	41.785	0.8549	Medium	11.98	12.06	8.544	40.687	0.8219	Medium	11.98	12.06	9.701	46.197	0.8378	Medium	11.99
R1021P	316	350	DEVRKEEWPLVDDCTGVTGYHEQLTIHGKDHESVF	11.04	5	32	11.28	11.36	6.903	21.571	0.8799	High	11.28	11.35	6.554	20.481	0.8806	High	11.28	11.35	6.654	20.794	0.8791	High	11.28	11.35	9.822	30.695	0.8703	Medium	11.28	11.35	9.49	29.657	0.865	Medium	11.28	11.35	9.281	29.003	0.8606	Medium	11.28	11.35	11.317	35.367	0.8436	Medium	11.28
R1021P	340	350	TIHGKDHESVF	6.78	2	9	7.01	7.08	1.317	14.635	0.8946	Medium	7.01	7.08	1.223	13.588	0.8803	Medium	7.01	7.08	1.246	13.842	0.8864	Medium	7.01	7.08	1.98	21.999	0.8444	Medium	7.01	7.09	2.075	23.057	0.8786	Medium	7.01	7.08	1.911	21.232	0.854	Medium	7.01	7.08	2.266	25.179	0.8452	Medium	7.01
R1021P	355	369	WDCDRKFRVKIRGID	8.99	4	13	8.99	9.06	0.199	1.529	0.7898	Medium	8.99	9.06	0.216	1.665	0.8053	Medium	8.99	9.06	0.297	2.282	0.8032	Medium	8.99	9.05	0.788	6.065	0.7752	Medium	8.99	9.06	0.77	5.92	0.7896	Medium	8.99	9.05	0.737	5.668	0.7914	Medium	8.99	9.05	0.952	7.324	0.7793	Medium	8.99
R1021P	355	379	WDCDRKFRVKIRGIDIPVLPRNTDL	10.5	4	21	10.47	10.55	2.792	13.296	0.7935	Medium	10.47	10.55	2.536	12.076	0.7103	Medium	10.47	10.55	2.618	12.466	0.7695	Medium	10.46	10.55	3.938	18.754	0.858	Medium	10.47	10.55	3.967	18.888	0.8065	Medium	10.46	10.55	3.802	18.107	0.8146	Medium	10.46	10.55	4.539	21.616	0.8411	Medium	10.46
R1021P	355	381	WDCDRKFRVKIRGIDIPVLPRNTDLTV	10.77	4	23	10.81	10.89	2.635	11.456	0.7406	Medium	10.81	10.89	2.467	10.727	0.7228	Medium	10.81	10.89	2.552	11.095	0.7354	Medium	10.81	10.88	4.332	18.836	0.773	Medium	10.81	10.88	4.304	18.712	0.7452	Medium	10.81	10.88	4.2	18.263	0.7548	Medium	10.81	10.88	5.234	22.756	0.7506	Medium	10.81
R1021P	370	381	IPVLPRNTDLTV	10.11	2	9	10.22	10.3	3.547	39.406	0.7907	Medium	10.22	10.3	3.458	38.417	0.7859	Medium	10.22	10.3	3.459	38.434	0.7902	Medium	10.22	10.29	4.803	53.362	0.7795	Medium	10.23	10.29	4.85	53.884	0.8007	Medium	10.22	10.3	4.775	53.052	0.7954	Medium	10.12	10.19	5.519	61.321	0.7487	Medium	10.22
R1021P	382	394	FVEANIQHGQQVL	9.2	2	11	9.34	9.45	1.294	11.762	0.9122	Medium	9.34	9.45	1.247	11.334	0.914	Medium	9.34	9.45	1.287	11.704	0.9129	Medium	9.34	9.45	2.098	19.073	0.8957	Medium	9.35	9.45	2.069	18.81	0.8957	Medium	9.34	9.45	2.043	18.57	0.8944	Medium	9.34	9.45	2.376	21.599	0.8963	Medium	9.34
R1021P	383	394	VEANIQHGQQVL	7.96	2	10	8.19	8.27	1.328	13.284	0.9161	Medium	8.19	8.28	1.252	12.518	0.9337	High	8.19	8.28	1.292	12.921	0.9375	High	8.19	8.27	2.05	20.496	0.9193	Medium	8.19	8.28	2.098	20.977	0.9195	High	8.19	8.27	2.028	20.284	0.9251	High	8.19	8.27	2.433	24.326	0.9094	Medium	8.19
R1021P	395	407	CQRRTSPKPFTEE	5.57	3	9	5.93	6.01	0.987	10.97	0.9181	High	5.93	6.01	0.881	9.787	0.9219	High	5.93	6.01	0.811	9.016	0.9259	High	5.93	6.01	1.908	21.198	0.9287	High	5.93	6.01	1.962	21.802	0.9305	High	5.93	6.01	1.856	20.625	0.9315	High	5.93	6.01	2.716	30.174	0.9279	High	5.93
R1021P	414	428	LEFSIKIKDLPKGAL	10.7	3	12	10.89	10.96	0.891	7.428	0.8291	Medium	10.89	10.96	0.84	7	0.8119	Medium	10.89	10.96	0.879	7.324	0.8087	Medium	10.89	10.96	1.522	12.681	0.8106	Medium	10.89	10.96	1.583	13.189	0.8372	Medium	10.89	10.96	1.508	12.565	0.8245	Medium	10.89	10.96	2.489	20.741	0.8009	Medium	10.89
R1021P	417	431	SIKIKDLPKGALLNL	10.61	4	12	10.84	10.92	0.147	1.222	0.8569	Medium	10.84	10.92	0.224	1.863	0.8669	Medium	10.84	10.92	0.239	1.99	0.8113	Medium	10.84	10.92	0.912	7.598	0.8579	Medium	10.84	10.92	0.88	7.334	0.8903	Medium	10.84	10.92	0.826	6.883	0.8814	Medium	10.84	10.92	1.263	10.522	0.8645	Medium	10.84
R1021P	432	441	QIYCGKAPAL	9.16	1	7	9.28	9.35	3.233	46.186	0.7532	Medium	9.28	9.35	3.122	44.595	0.7732	Medium	9.31	9.38	3.067	43.813	0.7568	Medium	9.28	9.35	3.69	52.712	0.7489	Medium	9.29	9.35	3.647	52.1	0.7018	Medium	9.28	9.35	3.674	52.49	0.7627	Medium	9.28	9.35	3.975	56.785	0.7376	Medium	9.31
R1021P	463	468	YVNLLL	13.46	2	4	13.64	13.72	0.06	1.493	0.8273	Medium	13.64	13.71	0.189	4.713	0.7705	Medium	13.64	13.71	0.109	2.725	0.7992	Medium	13.64	13.72	0.092	2.303	0.8708	Medium	13.64	13.71	0.172	4.307	0.8768	Medium	13.63	13.71	0.101	2.515	0.8819	Medium	13.63	13.71	0.232	5.806	0.8706	Medium	13.64
R1021P	467	479	LLIDHRFLLRRGE	9	4	11	9.27	9.34	0.329	2.989	0.9407	High	9.27	9.34	0.367	3.336	0.9127	High	9.27	9.34	0.323	2.937	0.9263	High	9.26	9.34	1.049	9.54	0.9158	High	9.27	9.35	1.063	9.66	0.9316	High	9.26	9.34	1.066	9.692	0.9234	High	9.26	9.34	1.396	12.691	0.9249	High	9.26
R1021P	467	480	LLIDHRFLLRRGEY	9.59	4	12	9.73	9.8	0.358	2.985	0.8715	Medium	9.73	9.8	0.346	2.885	0.8657	Medium	9.73	9.8	0.429	3.579	0.8702	Medium	9.72	9.8	0.939	7.825	0.8469	Medium	9.73	9.81	1.036	8.633	0.8877	Medium	9.72	9.8	1.05	8.748	0.8739	Medium	9.72	9.8	1.39	11.582	0.8748	Medium	9.72
R1021P	467	484	LLIDHRFLLRRGEYVLHM	10.56	4	16	10.72	10.8	0.713	4.459	0.8348	Medium	10.72	10.8	0.605	3.782	0.8021	Medium	10.72	10.8	0.661	4.13	0.8194	Medium	10.71	10.8	2.14	13.374	0.8433	Medium	10.71	10.8	2.193	13.704	0.8371	Medium	10.71	10.8	2.133	13.331	0.833	Medium	10.72	10.8	2.701	16.883	0.8419	Medium	10.71
R1021P	485	497	WQISGKGEDQGSF	9.72	2	11	10.05	10.13	5.716	51.967	0.7023	Medium	9.98	10.06	5.566	50.602	0.7093	Medium	9.98	10.06	5.633	51.212	0.7069	Medium	9.98	10.06	6.317	57.431	0.7479	Medium	9.98	10.07	6.214	56.49	0.719	Medium	10.04	10.12	6.204	56.402	0.7258	Medium	9.97	10.05	6.774	61.583	0.7242	Medium	10.03
R1021P	498	513	NADKLTSATNPDKENS	5.28	2	13	5.44	5.52	2.979	22.917	0.843	Medium	5.44	5.52	2.92	22.461	0.8184	Medium	5.44	5.52	2.907	22.358	0.8241	Medium	5.44	5.52	4.6	35.382	0.8444	Medium	5.49	5.56	4.626	35.583	0.8551	Medium	5.44	5.52	4.408	33.909	0.8488	Medium	5.44	5.52	5.864	45.108	0.8289	Medium	5.44
R1021P	498	514	NADKLTSATNPDKENSM	6.42	3	14	6.62	6.69	2.865	20.461	0.7402	Medium	6.62	6.69	2.752	19.66	0.7377	Medium	6.62	6.69	2.932	20.942	0.7461	Medium	6.62	6.69	4.837	34.55	0.6849	Medium	6.68	6.76	4.891	34.935	0.6882	Medium	6.62	6.69	4.682	33.441	0.7313	Medium	6.62	6.69	6.499	46.421	0.6825	Medium	6.62
R1021P	498	515	NADKLTSATNPDKENSMS	6.15	3	15	6.43	6.51	2.945	19.631	0.9015	High	6.44	6.51	2.659	17.725	0.8774	High	6.44	6.51	2.774	18.493	0.8784	Medium	6.44	6.51	4.689	31.262	0.8067	Medium	6.44	6.51	4.848	32.319	0.8774	High	6.44	6.51	4.536	30.237	0.8525	Medium	6.44	6.51	5.933	39.554	0.8363	Medium	6.44
R1021P	498	517	NADKLTSATNPDKENSMSIS	7.37	3	17	7.46	7.54	2.706	15.919	0.8576	Medium	7.46	7.54	2.526	14.858	0.8671	Medium	7.46	7.54	2.677	15.746	0.8793	Medium	7.46	7.53	4.517	26.569	0.8814	Medium	7.46	7.54	4.694	27.609	0.8727	Medium	7.46	7.53	4.52	26.588	0.8808	Medium	7.46	7.54	5.964	35.081	0.8736	Medium	7.46
R1021P	500	515	DKLTSATNPDKENSMS	6.05	3	13	6.19	6.27	2.485	19.116	0.7001	Medium	6.19	6.27	2.372	18.247	0.7188	Medium	6.19	6.27	2.389	18.374	0.7388	Medium	6.19	6.27	4.236	32.586	0.7825	Medium	6.2	6.27	4.269	32.84	0.7703	Medium	6.19	6.27	4.115	31.654	0.7781	Medium	6.19	6.27	5.603	43.097	0.7721	Medium	6.19
R1021P	520	551	LDNYCHPIALPKHQPTPDPEGDRVRAEMPNQL	8.94	4	24	9.03	9.11	10.138	42.241	0.7068	Medium	9.03	9.11	9.671	40.298	0.7037	Medium	9.03	9.11	9.696	40.398	0.7113	Medium	9.03	9.1	11.083	46.18	0.6894	Medium	9.03	9.11	11.053	46.052	0.6766	Medium	8.95	9.03	10.588	44.118	0.6576	Medium	9.03	9.1	10.778	44.908	0.6737	Medium	9.03
R1021P	557	592	AIIATDPLNPLTAEDKELLWHFRYESLKHPKAYPKL	11.09	5	30	11.18	11.25	10.655	35.516	0.6865	Medium	11.17	11.25	10.651	35.503	0.7235	Medium	11.15	11.22	10.962	36.54	0.6296	Medium	11.1	11.18	14.875	49.583	0.7453	Medium	11.14	11.22	15.033	50.109	0.7334	Medium	11.13	11.21	14.749	49.163	0.7218	Medium	11.12	11.19	17.749	59.165	0.7312	Medium	11.12
R1021P	558	573	IIATDPLNPLTAEDKE	10.45	2	12	10.65	10.72	5.678	47.314	0.7786	Medium	10.65	10.72	5.607	46.721	0.7811	Medium	10.65	10.72	5.652	47.097	0.7915	Medium	10.65	10.71	7.115	59.294	0.7662	Medium	10.65	10.71	7.244	60.366	0.7785	Medium	10.65	10.71	7.01	58.417	0.7727	Medium	10.65	10.72	7.772	64.764	0.7629	Medium	10.65
R1021P	558	578	IIATDPLNPLTAEDKELLWHF	13.76	3	17	13.9	13.98	6.094	35.845	0.755	Medium	13.84	13.91	5.824	34.261	0.7357	Medium	13.9	13.97	6.083	35.781	0.769	Medium	13.9	13.98	7.842	46.129	0.7049	Medium	13.95	14.02	7.75	45.589	0.6837	Medium	13.89	13.97	7.999	47.051	0.7413	Medium	13.89	13.97	8.971	52.77	0.7119	Medium	13.93
R1021P	579	592	RYESLKHPKAYPKL	6.31	4	10	6.49	6.57	3.325	33.252	0.787	Medium	6.5	6.57	3.168	31.681	0.7856	Medium	6.5	6.57	3.354	33.544	0.7697	Medium	6.49	6.57	3.708	37.08	0.8289	Medium	6.53	6.61	3.898	38.981	0.829	Medium	6.49	6.57	3.754	37.537	0.8233	Medium	6.49	6.57	4.541	45.405	0.8277	Medium	6.49
R1021P	593	601	FSSVKWGQQ	8.89	1	7	9.01	9.08	3.094	44.204	0.5918	Medium	9.06	9.14	3.244	46.34	0.7124	Medium	9.06	9.14	3.183	45.478	0.7282	Medium	9.06	9.14	4.118	58.827	0.6898	Medium	9.07	9.14	4.126	58.946	0.7436	Medium	9.03	9.1	4.035	57.65	0.7165	Medium	9.06	9.14	4.795	68.503	0.7092	Medium	9.06
R1021P	593	605	FSSVKWGQQEIVA	10.39	2	11	10.58	10.65	4.644	42.22	0.8799	Medium	10.57	10.65	4.442	40.379	0.8752	Medium	10.57	10.65	4.589	41.72	0.8374	Medium	10.57	10.65	6.143	55.846	0.8298	Medium	10.6	10.67	6.112	55.566	0.8592	Medium	10.57	10.65	5.996	54.51	0.8724	Medium	10.52	10.6	7.436	67.604	0.8796	Medium	10.62
R1021P	593	610	FSSVKWGQQEIVAKTYQL	10.78	2	16	10.85	10.93	7.23	45.186	0.7165	Medium	10.88	10.94	7.098	44.365	0.6933	Medium	10.85	10.93	7.073	44.209	0.6421	Medium	10.85	10.92	8.869	55.429	0.812	Medium	10.88	10.95	9.06	56.622	0.747	Medium	10.85	10.92	8.97	56.061	0.725	Medium	10.85	10.92	10.689	66.807	0.7803	Medium	10.85
R1021P	593	611	FSSVKWGQQEIVAKTYQLL	12.25	3	17	12.36	12.43	5.618	33.048	0.7245	Medium	12.36	12.43	5.733	33.725	0.7312	Medium	12.36	12.43	5.515	32.442	0.7046	Medium	12.37	12.43	7.758	45.633	0.7664	Medium	12.39	12.46	7.615	44.795	0.7202	Medium	12.36	12.43	7.659	45.052	0.7193	Medium	12.36	12.43	10.204	60.021	0.761	Medium	12.41
R1021P	612	622	ARREVWDQSAL	9.21	3	9	9.41	9.5	5.703	63.363	0.8495	Medium	9.43	9.53	5.606	62.287	0.778	Medium	9.43	9.53	5.724	63.602	0.81	Medium	9.31	9.39	5.7	63.335	0.887	Medium	9.31	9.4	5.717	63.526	0.8659	Medium	9.31	9.39	5.622	62.471	0.8645	Medium	9.31	9.39	5.832	64.799	0.8985	Medium	9.3
R1021P	623	630	DVGLTMQL	12.15	1	6	12.26	12.33	2.315	38.584	0.7921	Medium	12.26	12.33	2.359	39.31	0.7769	Medium	12.26	12.33	2.377	39.614	0.7705	Medium	12.27	12.33	3.376	56.259	0.7785	Medium	12.26	12.33	3.362	56.037	0.8615	Medium	12.21	12.27	3.359	55.978	0.8554	Medium	12.26	12.33	3.853	64.215	0.7867	Medium	12.27
R1021P	623	631	DVGLTMQLL	13.61	2	7	13.72	13.79	2.453	35.047	0.7764	Medium	13.69	13.76	2.348	33.542	0.7675	Medium	13.71	13.79	2.402	34.314	0.7569	Medium	13.72	13.79	3.743	53.475	0.7906	Medium	13.71	13.79	3.705	52.928	0.8081	Medium	13.71	13.78	3.769	53.85	0.7901	Medium	13.71	13.79	4.143	59.192	0.787	Medium	13.76
R1021P	631	635	LDCNF	10.77	1	3	10.84	10.92	1.085	36.171	0.8778	Medium	10.84	10.92	1.058	35.279	0.8291	Medium	10.84	10.92	1.017	33.913	0.8583	Medium	10.84	10.92	1.608	53.587	0.8829	Medium	10.84	10.92	1.573	52.439	0.8773	Medium	10.84	10.92	1.566	52.188	0.8728	Medium	10.84	10.92	1.919	63.954	0.8713	Medium	10.84
R1021P	634	642	NFSDENVRA	7.27	2	7	7.44	7.51	2.059	29.417	0.6163	Medium	7.47	7.54	1.952	27.883	0.6284	Medium	7.44	7.51	1.938	27.685	0.5955	Medium	7.44	7.51	3.059	43.695	0.6816	Medium	7.5	7.57	3.095	44.218	0.6538	Medium	7.39	7.47	3.082	44.024	0.6347	Medium	7.44	7.51	3.586	51.227	0.6855	Medium	7.44
R1021P	636	642	SDENVRA	4.38	2	5	4.68	4.76	1.112	22.232	0.9535	High	4.68	4.76	1.048	20.963	0.9466	High	4.68	4.76	1.077	21.535	0.958	High	4.68	4.76	2.156	43.116	0.926	High	4.68	4.76	2.155	43.101	0.9303	High	4.6	4.67	2.121	42.419	0.93	High	4.68	4.76	2.594	51.885	0.9444	High	4.68
R1021P	643	657	IAVQKLESLEDDDVL	11.41	2	13	11.57	11.64	1.789	13.765	0.8328	Medium	11.56	11.64	1.653	12.715	0.8226	Medium	11.56	11.64	1.846	14.198	0.8336	Medium	11.56	11.64	3.01	23.156	0.7836	Medium	11.56	11.64	3.269	25.142	0.8275	Medium	11.56	11.64	3.175	24.42	0.8048	Medium	11.56	11.64	4.687	36.051	0.7962	Medium	11.56
R1021P	643	662	IAVQKLESLEDDDVLHYLLQ	13.55	3	18	13.54	13.62	1.318	7.322	0.7953	Medium	13.54	13.61	1.293	7.183	0.7511	Medium	13.54	13.61	1.309	7.273	0.7498	Medium	13.54	13.62	3.441	19.115	0.8606	Medium	13.53	13.61	3.503	19.462	0.8405	Medium	13.53	13.61	3.373	18.736	0.8424	Medium	13.53	13.61	5.053	28.075	0.8589	Medium	13.54
R1021P	651	663	LEDDDVLHYLLQL	14.41	3	11	14.45	14.51	0.138	1.258	0.6763	Medium	14.44	14.51	0.021	0.189	0.6655	Medium	14.44	14.51	0.149	1.353	0.7014	Medium	14.45	14.51	1.334	12.123	0.7208	Medium	14.44	14.51	1.305	11.864	0.6991	Medium	14.44	14.51	1.319	11.995	0.7033	Medium	14.44	14.51	1.894	17.219	0.7252	Medium	14.45
R1021P	652	662	EDDDVLHYLLQ	13.33	3	9	13.41	13.48	0.274	3.046	0.6901	Medium	13.37	13.44	0.136	1.508	0.629	Medium	13.4	13.48	0.286	3.178	0.5931	Medium	13.41	13.48	0.842	9.351	0.6613	Medium	13.4	13.48	1.006	11.173	0.7574	Medium	13.4	13.47	1.058	11.758	0.7014	Medium	13.4	13.47	1.573	17.478	0.685	Medium	13.41
R1021P	654	662	DDVLHYLLQ	12.98	2	7	13.2	13.27	0.219	3.126	0.756	Medium	13.19	13.27	0.214	3.058	0.7628	Medium	13.19	13.27	0.235	3.357	0.7793	Medium	13.2	13.27	0.891	12.73	0.7538	Medium	13.19	13.27	0.915	13.073	0.7892	Medium	13.19	13.26	0.845	12.074	0.7508	Medium	13.19	13.26	1.623	23.179	0.6661	Medium	13.2
R1021P	655	662	DVLHYLLQ	12.82	2	6	13.02	13.09	0.156	2.602	0.8299	Medium	13.02	13.09	0.133	2.22	0.8298	Medium	13.02	13.09	0.138	2.306	0.8551	Medium	13.02	13.1	0.927	15.446	0.805	Medium	13.01	13.09	0.922	15.371	0.8383	Medium	13.01	13.09	0.873	14.556	0.8164	Medium	13.01	13.09	1.523	25.381	0.782	Medium	13.02
R1021P	655	663	DVLHYLLQL	14.29	2	7	14.47	14.54	0.177	2.53	0.898	Medium	14.47	14.54	0.172	2.455	0.8932	Medium	14.47	14.54	0.178	2.538	0.8954	Medium	14.47	14.55	1.046	14.949	0.9073	Medium	14.47	14.54	1.078	15.393	0.9065	Medium	14.46	14.54	1.006	14.372	0.9071	Medium	14.46	14.54	1.863	26.61	0.9115	Medium	14.47
R1021P	663	677	LVQAVKFEPYHDSAL	9.69	3	12	9.92	9.99	0.628	5.233	0.839	Medium	9.92	9.99	0.574	4.787	0.8447	Medium	9.92	9.99	0.531	4.423	0.8346	Medium	9.92	9.98	0.89	7.414	0.8598	Medium	9.92	9.99	0.903	7.526	0.862	Medium	9.92	9.98	0.861	7.175	0.8659	Medium	9.92	9.98	1.091	9.092	0.861	Medium	9.92
R1021P	664	677	VQAVKFEPYHDSAL	9.26	2	11	9.35	9.43	0.704	6.397	0.8629	Medium	9.35	9.43	0.614	5.578	0.8706	Medium	9.35	9.42	0.631	5.734	0.8787	Medium	9.35	9.42	0.869	7.896	0.8552	Medium	9.35	9.43	0.94	8.542	0.8778	Medium	9.35	9.42	0.943	8.574	0.8754	Medium	9.35	9.42	1.15	10.458	0.8561	Medium	9.35
R1021P	666	677	AVKFEPYHDSAL	8.99	2	9	9.11	9.19	0.617	6.858	0.7127	Medium	9.11	9.19	0.593	6.588	0.7268	Medium	9.11	9.19	0.557	6.183	0.7393	Medium	9.11	9.19	0.857	9.521	0.6887	Medium	9.12	9.19	0.956	10.624	0.7758	Medium	9.11	9.19	0.891	9.896	0.7235	Medium	9.11	9.19	1.127	12.525	0.7149	Medium	9.11
R1021P	681	697	LLKRGLRNKRIGHFLFW	10.28	4	15	10.42	10.5	0.096	0.641	0.9042	Medium	10.42	10.5	0.054	0.361	0.9114	Medium	10.42	10.5	0.088	0.59	0.903	Medium	10.41	10.5	0.066	0.442	0.8875	Medium	10.42	10.5	0.094	0.626	0.9208	Medium	10.41	10.5	0.07	0.466	0.9085	Medium	10.41	10.5	0.093	0.618	0.901	Medium	10.41
R1021P	681	699	LLKRGLRNKRIGHFLFWFL	12.41	5	17	12.57	12.64	0.083	0.486	0.9053	Medium	12.56	12.64	0.073	0.43	0.9059	Medium	12.56	12.64	0.049	0.286	0.8961	Medium	12.57	12.64	0.029	0.168	0.8945	Medium	12.56	12.64	0.048	0.28	0.9174	High	12.56	12.64	0.021	0.123	0.9135	High	12.56	12.64	0.112	0.658	0.9127	Medium	12.57
R1021P	698	713	FLRSEIAQSRHYQQRF	7.69	4	14	7.78	7.85	0.776	5.54	0.9137	Medium	7.78	7.86	0.695	4.967	0.9204	Medium	7.78	7.86	0.766	5.47	0.9168	Medium	7.78	7.85	1.777	12.695	0.9221	Medium	7.78	7.86	1.888	13.483	0.9276	Medium	7.78	7.85	1.795	12.823	0.9222	Medium	7.78	7.85	3.075	21.961	0.9236	Medium	7.78
R1021P	700	713	RSEIAQSRHYQQRF	5.94	4	12	6.19	6.27	0.656	5.464	0.8201	Medium	6.19	6.27	0.685	5.712	0.8209	Medium	6.19	6.27	0.568	4.736	0.828	Medium	6.14	6.22	1.485	12.371	0.8289	Medium	6.2	6.27	1.487	12.391	0.8397	Medium	6.19	6.27	1.509	12.573	0.8206	Medium	6.15	6.23	2.468	20.57	0.8117	Medium	6.19
R1021P	729	738	LHDFTQQVQV	9.15	2	8	9.33	9.4	0.113	1.415	0.7834	Medium	9.33	9.4	0.126	1.581	0.7672	Medium	9.33	9.4	0.123	1.54	0.7886	Medium	9.23	9.31	0.539	6.735	0.7823	Medium	9.29	9.36	0.578	7.219	0.7944	Medium	9.24	9.31	0.496	6.196	0.7895	Medium	9.23	9.31	0.92	11.502	0.7285	Medium	9.24
R1021P	730	737	HDFTQQVQ	6.37	1	6	6.59	6.66	0.174	2.895	0.712	Medium	6.6	6.66	0.282	4.706	0.6744	Medium	6.63	6.7	0.215	3.577	0.6744	Medium	6.59	6.66	0.246	4.096	0.7345	Medium	6.6	6.67	0.239	3.978	0.7214	Medium	6.59	6.66	0.279	4.652	0.7042	Medium	6.6	6.66	0.657	10.955	0.6758	Medium	6.59
R1021P	730	738	HDFTQQVQV	8.35	1	7	8.51	8.58	0.42	5.995	0.6708	Medium	8.51	8.58	0.394	5.634	0.681	Medium	8.51	8.58	0.481	6.873	0.6623	Medium	8.51	8.58	0.639	9.126	0.698	Medium	8.51	8.58	0.611	8.734	0.7007	Medium	8.51	8.58	0.672	9.598	0.6631	Medium	8.51	8.58	0.96	13.714	0.6725	Medium	8.51
R1021P	732	737	FTQQVQ	5.59	1	4	5.86	5.92	0.085	2.118	0.6875	Medium	5.86	5.92	0.097	2.43	0.6806	Medium	5.86	5.92	0.122	3.061	0.6997	Medium	5.86	5.92	0.497	12.434	0.8023	Medium	5.86	5.93	0.546	13.652	0.8031	Medium	5.86	5.92	0.481	12.034	0.7975	Medium	5.86	5.92	0.758	18.947	0.823	Medium	5.86
R1021P	732	738	FTQQVQV	8.2	1	5	8.45	8.53	0.366	7.313	0.6892	Medium	8.46	8.53	0.389	7.79	0.7471	Medium	8.48	8.54	0.407	8.14	0.7746	Medium	8.43	8.51	0.724	14.48	0.774	Medium	8.44	8.51	0.729	14.583	0.7974	Medium	8.43	8.51	0.741	14.823	0.7526	Medium	8.43	8.51	1.145	22.901	0.7662	Medium	8.43
R1021P	742	747	LQKVTL	8.23	1	4	8.48	8.56	1.177	29.419	0.9067	Medium	8.49	8.56	1.162	29.047	0.9107	Medium	8.49	8.56	1.203	30.075	0.9097	Medium	8.48	8.56	2.195	54.88	0.9062	Medium	8.49	8.56	2.149	53.714	0.8949	Medium	8.48	8.56	2.197	54.933	0.8995	Medium	8.48	8.56	2.811	70.274	0.8913	Medium	8.48
R1021P	742	782	LQKVTLDIKSLSAEKYDVSSQVISQLKQKLENLQNSQLPES	12.36	5	38	12.57	12.64	19.263	50.693	0.7167	Medium	12.56	12.64	19.056	50.146	0.7096	Medium	12.56	12.64	19.038	50.1	0.7342	Medium	12.57	12.64	25.684	67.59	0.7186	Medium	12.56	12.64	26.554	69.88	0.7277	Medium	12.56	12.64	26.095	68.671	0.7282	Medium	12.66	12.74	26.638	70.101	0.5392	Medium	12.57
R1021P	748	767	DIKSLSAEKYDVSSQVISQL	11.14	3	18	11.13	11.22	13.004	72.244	0.7499	Medium	11.12	11.21	12.992	72.175	0.7335	Medium	11.15	11.25	13.142	73.009	0.8218	Medium	11.14	11.23	13.565	75.359	0.8471	Medium	11.21	11.31	13.757	76.428	0.8758	Medium	11.14	11.23	13.661	75.894	0.8366	Medium	11.27	11.34	13.396	74.421	0.8296	Medium	11.23
R1021P	748	782	DIKSLSAEKYDVSSQVISQLKQKLENLQNSQLPES	12.56	5	32	12.62	12.69	18.817	58.803	0.9034	High	12.61	12.69	18.375	57.422	0.8927	High	12.61	12.69	18.262	57.07	0.8581	Medium	12.55	12.63	24.171	75.536	0.8466	Medium	12.61	12.69	24.534	76.669	0.8846	High	12.56	12.64	24.192	75.6	0.8849	High	12.69	12.76	24.595	76.858	0.8365	Medium	12.58
R1021P	755	782	EKYDVSSQVISQLKQKLENLQNSQLPES	12.25	4	25	12.36	12.44	13.634	54.536	0.764	Medium	12.36	12.44	13.224	52.896	0.757	Medium	12.36	12.44	13.804	55.217	0.7812	Medium	12.37	12.44	18.809	75.236	0.6966	Medium	12.24	12.32	18.398	73.593	0.7392	Medium	12.36	12.43	18.883	75.534	0.6797	Medium	12.36	12.43	19.42	77.681	0.6835	Medium	12.37
R1021P	768	782	KQKLENLQNSQLPES	7.11	2	12	7.34	7.42	6.081	50.678	0.9278	High	7.34	7.42	5.838	48.646	0.9312	High	7.34	7.42	5.822	48.518	0.9335	High	7.34	7.42	8.383	69.857	0.9338	High	7.39	7.46	8.551	71.258	0.9167	High	7.34	7.42	8.359	69.659	0.9239	High	7.29	7.37	9.059	75.489	0.9262	High	7.34
R1021P	783	796	FRVPYDPGLKAGAL	10.17	3	10	10.37	10.44	2.75	27.504	0.8692	High	10.44	10.52	2.809	28.087	0.8476	Medium	10.44	10.52	2.594	25.945	0.8751	Medium	10.44	10.51	2.898	28.976	0.81	Medium	10.44	10.52	2.799	27.991	0.8673	Medium	10.44	10.51	2.735	27.352	0.8636	Medium	10.44	10.51	3.083	30.832	0.8219	Medium	10.44
R1021P	797	815	AIEKCKVMASKKKPLWLEF	10.45	2	16	10.51	10.58	3.061	19.134	0.8117	Medium	10.51	10.58	2.98	18.624	0.797	Medium	10.51	10.58	3.13	19.564	0.7741	Medium	10.5	10.58	4.224	26.403	0.8282	Medium	10.51	10.59	4.215	26.344	0.8095	Medium	10.5	10.58	4.019	25.116	0.8117	Medium	10.51	10.58	4.578	28.615	0.8115	Medium	10.5
R1021P	816	829	KCADPTALSNETIG	8.17	2	11	8.4	8.47	4.765	43.319	0.8786	Medium	8.4	8.47	4.515	41.043	0.8689	Medium	8.4	8.47	4.591	41.739	0.8546	Medium	8.4	8.47	6.845	62.227	0.8637	Medium	8.4	8.47	6.891	62.641	0.8752	Medium	8.3	8.37	6.888	62.621	0.591	Medium	8.4	8.47	7.271	66.104	0.8673	Medium	8.4
R1021P	816	842	KCADPTALSNETIGIIFKHGDDLRQDM	12.04	4	24	12.1	12.23	5.246	21.859	0.7352	Medium	12.1	12.23	5.349	22.285	0.7408	Medium	12.16	12.23	5.754	23.975	0.7557	Medium	12.1	12.22	9.173	38.222	0.6864	Medium	12.1	12.23	9.469	39.453	0.7227	Medium	12.1	12.22	8.722	36.343	0.7906	Medium	12.1	12.23	10.56	43.998	0.7061	Medium	12.11
R1021P	832	845	FKHGDDLRQDMLIL	9.83	4	12	9.85	9.93	1.336	11.136	0.6754	Medium	9.85	9.93	1.268	10.566	0.661	Medium	9.85	9.93	1.484	12.367	0.6716	Medium	9.85	9.93	2.783	23.189	0.7265	Medium	9.86	9.93	2.958	24.654	0.7449	Medium	9.85	9.93	2.812	23.437	0.731	Medium	9.85	9.93	3.368	28.065	0.7468	Medium	9.85
R1021P	844	852	ILQILRIME	13.25	2	7	13.35	13.41	0.083	1.188	0.8393	Medium	13.33	13.41	0.103	1.47	0.7776	Medium	13.34	13.4	0.137	1.961	0.7037	Medium	13.3	13.37	0.396	5.661	0.8401	Medium	13.33	13.41	0.47	6.711	0.8369	Medium	13.33	13.41	0.328	4.681	0.8592	Medium	13.29	13.37	1.078	15.395	0.8554	Medium	13.33
R1021P	849	862	RIMESIWETESLDL	13.25	2	12	13.41	13.49	1.621	13.508	0.6578	Medium	13.41	13.49	1.661	13.843	0.69	Medium	13.41	13.49	1.855	15.461	0.6843	Medium	13.41	13.49	3.735	31.123	0.7184	Medium	13.41	13.48	3.618	30.151	0.7251	Medium	13.4	13.47	3.747	31.222	0.6794	Medium	13.41	13.48	4.455	37.121	0.7175	Medium	13.46
R1021P	853	861	SIWETESLD	11.57	1	7	11.71	11.78	1.699	24.27	0.8122	Medium	11.71	11.78	1.771	25.305	0.7824	Medium	11.71	11.78	1.828	26.12	0.8051	Medium	11.7	11.78	2.876	41.09	0.8143	Medium	11.74	11.81	2.888	41.259	0.7382	Medium	11.7	11.78	2.899	41.409	0.805	Medium	11.71	11.78	3.427	48.956	0.8161	Medium	11.7
R1021P	853	862	SIWETESLDL	13.36	1	8	13.54	13.62	1.693	21.157	0.6781	Medium	13.54	13.61	1.706	21.323	0.6853	Medium	13.54	13.61	1.717	21.462	0.7008	Medium	13.54	13.62	3.375	42.184	0.6718	Medium	13.53	13.61	3.478	43.469	0.7134	Medium	13.53	13.61	3.395	42.443	0.725	Medium	13.53	13.61	3.918	48.971	0.6844	Medium	13.54
R1021P	862	878	LCLLPYGCISTGDKIGM	13.08	2	14	13.21	13.28	3.029	21.637	0.8394	Medium	13.26	13.33	3.158	22.56	0.8125	Medium	13.21	13.28	3.318	23.703	0.8391	Medium	13.21	13.28	4.205	30.038	0.8381	Medium	13.21	13.27	4.305	30.748	0.8502	Medium	13.21	13.27	4.306	30.757	0.8491	Medium	13.21	13.27	4.923	35.167	0.8358	Medium	13.21
R1021P	863	878	CLLPYGCISTGDKIGM	12.04	2	13	12.18	12.25	3.1	23.846	0.7949	Medium	12.18	12.25	2.821	21.7	0.7808	Medium	12.18	12.25	3.057	23.513	0.7789	Medium	12.18	12.25	4.241	32.62	0.8293	Medium	12.23	12.3	4.244	32.649	0.808	Medium	12.17	12.25	4.076	31.354	0.8444	Medium	12.22	12.29	4.769	36.687	0.8531	Medium	12.18
R1021P	865	878	LPYGCISTGDKIGM	10.57	2	12	10.6	10.67	3.717	30.978	0.6489	Medium	10.6	10.67	3.902	32.518	0.6422	Medium	10.66	10.73	3.614	30.119	0.5731	Medium	10.6	10.66	4.628	38.569	0.6081	Medium	10.6	10.66	4.548	37.898	0.6194	Medium	10.6	10.66	4.53	37.746	0.6136	Medium	10.62	10.7	5.596	46.635	0.5464	Medium	10.6
R1021P	879	887	IEIVKDATT	7.16	1	7	7.37	7.44	2.984	42.628	0.8578	Medium	7.37	7.45	2.864	40.911	0.8537	Medium	7.37	7.44	2.85	40.712	0.8516	Medium	7.28	7.36	4.081	58.302	0.8551	Medium	7.33	7.4	4.201	60.012	0.8413	Medium	7.3	7.38	4.057	57.955	0.8411	Medium	7.37	7.44	4.382	62.606	0.8694	Medium	7.38
R1021P	888	901	IAKIQQSTVGNTGA	6.15	2	12	6.33	6.41	7.556	62.963	0.8909	Medium	6.34	6.41	7.347	61.226	0.8829	Medium	6.34	6.41	7.463	62.194	0.873	Medium	6.33	6.41	7.816	65.13	0.8681	Medium	6.34	6.41	8.001	66.674	0.8828	Medium	6.33	6.41	7.737	64.477	0.8712	Medium	6.33	6.41	8.162	68.015	0.8806	Medium	6.33
R1021P	902	910	FKDEVLNHW	10.1	3	7	10.29	10.37	1.236	17.655	0.7563	Medium	10.29	10.37	1.249	17.847	0.7462	Medium	10.29	10.36	1.251	17.877	0.7306	Medium	10.29	10.36	1.538	21.964	0.727	Medium	10.29	10.37	1.643	23.475	0.8148	Medium	10.29	10.36	1.546	22.083	0.7952	Medium	10.29	10.36	1.807	25.808	0.7996	Medium	10.29
R1021P	908	924	NHWLKEKSPTEEKFQAA	7.08	3	14	7.28	7.36	4.41	31.499	0.5711	Medium	7.28	7.36	4.417	31.551	0.5962	Medium	7.28	7.36	4.459	31.852	0.605	Medium	7.27	7.36	5.518	39.412	0.6271	Medium	7.28	7.36	5.556	39.689	0.6622	Medium	7.27	7.36	5.408	38.632	0.6309	Medium	7.28	7.36	6.158	43.984	0.6278	Medium	7.25
R1021P	927	934	RFVYSCAG	8.29	2	6	8.6	8.69	1.183	19.717	0.7211	Medium	8.6	8.7	1.098	18.307	0.7035	Medium	8.6	8.7	1.062	17.706	0.7422	Medium	8.6	8.69	2.164	36.059	0.594	Medium	8.61	8.7	2.198	36.633	0.6608	Medium	8.49	8.58	2.192	36.533	0.6482	Medium	8.6	8.69	2.348	39.131	0.6544	Medium	8.6
R1021P	935	939	YCVAT	6.89	1	3	7.13	7.21	0.128	4.278	0.8728	Medium	7.13	7.21	0.109	3.62	0.8659	Medium	7.13	7.21	0.161	5.369	0.8739	Medium	7.13	7.21	0.489	16.302	0.8741	Medium	7.14	7.21	0.54	18.004	0.8754	Medium	7.13	7.21	0.493	16.434	0.874	Medium	7.13	7.21	0.757	25.242	0.8718	Medium	7.13
R1021P	940	953	FVLGIGDRHNDNIM	10.61	2	12	10.83	10.9	1.544	12.868	0.7526	Medium	10.83	10.9	1.532	12.764	0.7399	Medium	10.83	10.9	1.506	12.551	0.7557	Medium	10.82	10.9	2.271	18.923	0.7329	Medium	10.82	10.9	2.415	20.129	0.7664	Medium	10.82	10.9	2.26	18.836	0.773	Medium	10.82	10.9	2.783	23.194	0.7606	Medium	10.82
R1021P	954	960	ITETGNL	7.64	1	5	7.9	7.97	1.633	32.668	0.7938	Medium	7.92	7.99	1.661	33.215	0.774	Medium	7.91	7.98	1.66	33.194	0.7892	Medium	7.82	7.9	2.01	40.21	0.8309	Medium	7.88	7.95	2.123	42.457	0.8383	Medium	7.86	7.94	2.11	42.19	0.8567	Medium	7.82	7.9	2.268	45.352	0.8335	Medium	7.9
R1021P	954	961	ITETGNLF	11.35	1	6	11.48	11.55	2.216	36.934	0.6622	Medium	11.48	11.55	2.062	34.372	0.6502	Medium	11.48	11.55	2.153	35.881	0.6876	Medium	11.48	11.54	2.565	42.757	0.6789	Medium	11.48	11.54	2.46	41.004	0.6807	Medium	11.48	11.55	2.479	41.319	0.6794	Medium	11.48	11.55	2.687	44.787	0.6701	Medium	11.52
R1021P	954	976	ITETGNLFHIDFGHILGNYKSFL	13.82	4	21	14	14.08	4.941	23.531	0.5208	Medium	14	14.07	4.9	23.331	0.5232	Medium	14	14.07	5.264	25.068	0.5397	Medium	14	14.08	6.978	33.228	0.5422	Medium	13.95	14.02	7.074	33.688	0.5056	Medium	13.99	14.07	6.684	31.828	0.557	Medium	13.99	14.07	7.509	35.759	0.569	Medium	14
R1021P	961	972	FHIDFGHILGNY	12.72	3	10	12.89	12.97	3.003	30.029	0.8537	Medium	12.89	12.97	2.914	29.135	0.8546	Medium	12.89	12.97	2.896	28.959	0.8612	Medium	12.89	12.97	3.708	37.079	0.8558	Medium	12.89	12.96	3.767	37.674	0.8716	Medium	12.89	12.96	3.686	36.861	0.8591	Medium	12.89	12.96	4.097	40.965	0.8592	Medium	12.89
R1021P	961	976	FHIDFGHILGNYKSFL	13.36	4	14	13.5	13.57	5.732	40.944	0.8596	Medium	13.49	13.57	5.549	39.635	0.8297	Medium	13.5	13.57	5.369	38.347	0.8681	Medium	13.5	13.57	6.646	47.471	0.8892	High	13.49	13.57	6.663	47.594	0.8939	High	13.49	13.57	6.514	46.527	0.8986	High	13.49	13.57	6.978	49.846	0.8877	High	13.5
R1021P	962	975	HIDFGHILGNYKSF	11.42	4	12	11.53	11.61	3.946	32.887	0.7671	Medium	11.53	11.61	4.044	33.697	0.7694	Medium	11.53	11.61	4.07	33.915	0.7748	Medium	11.53	11.6	5.101	42.512	0.7355	Medium	11.53	11.6	5.271	43.921	0.7946	Medium	11.53	11.6	5.087	42.39	0.7752	Medium	11.53	11.6	5.598	46.647	0.7461	Medium	11.54
R1021P	973	992	KSFLGINKERVPFVLTPDFL	12.87	4	16	12.86	12.93	4.604	28.776	0.8425	Medium	12.86	12.93	4.38	27.376	0.8389	Medium	12.86	12.93	4.456	27.85	0.8052	Medium	12.85	12.94	6.311	39.446	0.8586	Medium	12.85	12.93	6.604	41.277	0.8564	Medium	12.85	12.93	6.261	39.131	0.8407	Medium	12.85	12.93	7.631	47.693	0.8551	Medium	12.86
R1021P	976	992	LGINKERVPFVLTPDFL	13.24	3	13	13.23	13.31	3.586	27.584	0.8769	Medium	13.23	13.31	3.599	27.681	0.8715	Medium	13.23	13.31	3.596	27.659	0.8588	Medium	13.23	13.31	5.211	40.088	0.8976	Medium	13.22	13.31	5.472	42.092	0.9006	Medium	13.22	13.31	5.223	40.176	0.9043	Medium	13.22	13.31	6.282	48.323	0.8954	Medium	13.23
R1021P	977	992	GINKERVPFVLTPDFL	12.98	3	12	13.14	13.22	2.91	24.247	0.9028	Medium	13.13	13.22	2.723	22.688	0.9087	Medium	13.13	13.22	2.831	23.588	0.8995	Medium	13.14	13.22	4.559	37.993	0.9052	Medium	13.13	13.22	4.721	39.338	0.9199	Medium	13.13	13.21	4.445	37.039	0.9095	Medium	13.13	13.21	5.639	46.992	0.8999	Medium	13.14
R1021P	980	992	KERVPFVLTPDFL	12.82	3	9	12.99	13.07	1.679	18.659	0.6488	Medium	12.99	13.07	1.591	17.677	0.6827	Medium	12.99	13.07	1.781	19.788	0.6868	Medium	13.04	13.11	3.238	35.975	0.6317	Medium	12.99	13.06	3.27	36.331	0.7121	Medium	12.99	13.06	3.154	35.047	0.6867	Medium	12.99	13.06	4.162	46.249	0.6765	Medium	12.99
R1021P	993	1014	FVMGTSGKKTSPHFQKFQDICV	9.54	2	19	9.69	9.76	2.41	12.686	0.7692	Medium	9.69	9.76	2.559	13.47	0.7634	Medium	9.68	9.76	2.684	14.126	0.7643	Medium	9.68	9.76	4.033	21.227	0.6718	Medium	9.69	9.76	4.288	22.568	0.712	Medium	9.68	9.76	3.892	20.483	0.6909	Medium	9.68	9.76	4.737	24.933	0.6482	Medium	9.68
R1021P	1035	1050	LMTGMPQLTSKEDIEY	10.99	2	13	11.08	11.15	5.37	41.306	0.69	Medium	11.08	11.15	5.343	41.104	0.6665	Medium	11.08	11.15	5.273	40.562	0.6941	Medium	11.07	11.15	7.235	55.657	0.6997	Medium	11.07	11.15	7.284	56.034	0.6963	Medium	11.08	11.15	7.127	54.825	0.7132	Medium	11.03	11.09	8.34	64.154	0.6919	Medium	11.19
R1021P	1050	1071	YIRDALTVGKNEEDAKKYFLDQ	9.85	4	20	10	10.06	6.211	31.053	0.6038	Medium	10	10.06	5.996	29.978	0.6296	Medium	10	10.06	6.044	30.222	0.6271	Medium	9.9	9.97	9.508	47.54	0.622	Medium	9.92	10	9.428	47.141	0.6531	Medium	9.93	9.99	9.114	45.571	0.6541	Medium	9.99	10.06	11.461	57.303	0.5879	Medium	9.99
R1021P	1051	1071	IRDALTVGKNEEDAKKYFLDQ	9.48	3	19	9.55	9.63	6.653	35.018	0.6155	Medium	9.51	9.58	6.636	34.927	0.6102	Medium	9.51	9.58	6.828	35.939	0.6318	Medium	9.51	9.58	9.377	49.352	0.5926	Medium	9.51	9.59	9.765	51.397	0.6555	Medium	9.51	9.58	9.628	50.672	0.6134	Medium	9.51	9.58	11.233	59.12	0.6078	Medium	9.51
R1021P	1051	1073	IRDALTVGKNEEDAKKYFLDQIE	10.45	4	21	10.58	10.65	6.892	32.819	0.7187	Medium	10.57	10.65	6.801	32.384	0.7111	Medium	10.57	10.65	6.605	31.452	0.7341	Medium	10.57	10.65	10.143	48.301	0.6945	Medium	10.61	10.68	10.416	49.6	0.6973	Medium	10.57	10.65	9.816	46.741	0.7464	Medium	10.57	10.65	12.777	60.842	0.6707	Medium	10.57
R1021P	1072	1084	IEVCRDKGWTVQF	11.18	3	11	11.32	11.42	3.168	28.797	0.8318	Medium	11.32	11.41	3.067	27.879	0.844	Medium	11.32	11.41	3.081	28.013	0.8526	Medium	11.32	11.41	5.629	51.173	0.8211	Medium	11.32	11.41	5.749	52.261	0.8612	Medium	11.32	11.41	5.535	50.322	0.8369	Medium	11.32	11.41	6.468	58.799	0.8134	Medium	11.32
R1021P	1085	1092	NWFLHLVL	14.19	2	6	14.4	14.47	0.848	14.131	0.8839	Medium	14.39	14.47	0.725	12.077	0.8853	Medium	14.39	14.47	0.772	12.861	0.8786	Medium	14.4	14.47	2.738	45.635	0.8489	Medium	14.44	14.51	2.793	46.553	0.8458	Medium	14.39	14.46	2.747	45.786	0.8466	Medium	14.39	14.46	3.479	57.988	0.8752	Medium	14.39
R1021P	1088	1092	LHLVL	11.09	2	3	11.15	11.22	0.385	12.818	0.897	High	11.3	11.37	0.387	12.916	0.7495	Medium	11.19	11.26	0.37	12.333	0.9055	High	11.11	11.18	1.528	50.921	0.9208	High	11.18	11.25	1.559	51.962	0.8828	High	11.1	11.18	1.568	52.271	0.8989	Medium	11.19	11.27	1.956	65.203	0.903	High	11.25
R1021P	1091	1102	VLGIKQGEKHSA	5.16	3	10	5.3	5.37	4.004	40.037	0.8234	Medium	5.3	5.37	4.067	40.673	0.8201	Medium	5.3	5.37	3.984	39.837	0.8273	Medium	5.3	5.37	4.692	46.917	0.8022	Medium	5.3	5.37	4.699	46.989	0.7805	Medium	5.3	5.37	4.497	44.974	0.806	Medium	5.37	5.44	4.543	45.432	0.7417	Medium	5.3
R1021P	1093	1102	GIKQGEKHSA	3.38	1	8	3.53	3.6	3.483	43.542	0.6646	Medium	3.49	3.56	3.545	44.319	0.6761	Medium	3.49	3.56	3.53	44.125	0.7529	Medium	3.46	3.53	3.852	48.145	0.7786	Medium	3.47	3.54	3.769	47.11	0.8254	Medium	3.44	3.5	3.736	46.705	0.7253	Medium	3.48	3.55	3.847	48.085	0.7324	Medium	3.48
Mutant Peptides
							3s						3s						3s						30s						30s						30s						300s						300s
State	Start	End	Sequence	Search RT	Charge	Max D	Start RT	End RT	#D	%D	Score	Conf	Start RT	End RT	#D	%D	Score	Conf	Start RT	End RT	#D	%D	Score	Conf	Start RT	End RT	#D	%D	Score	Conf	Start RT	End RT	#D	%D	Score	Conf	Start RT	End RT	#D	%D	Score	Conf	Start RT	End RT	#D	%D	Score	Conf	Start RT
Apo	1017	1027	YLALRHHTNLL	8.29	2	9	8.41	8.48	0.118	1.313	0.7817	Medium	8.41	8.49	0.068	0.758	0.7952	Medium	8.41	8.48	0.107	1.189	0.834	Medium	8.31	8.39	0.215	2.384	0.7173	Medium	8.41	8.48	0.218	2.42	0.7863	Medium	8.38	8.46	0.195	2.171	0.8118	Medium	8.41	8.48	0.513	5.705	0.7421	Medium	8.41
							3s						3s						3s						30s						30s						30s						300s						300s
	Start	End	Sequence	Search RT	Charge	Max D	Start RT	End RT	#D	%D	Score	Conf	Start RT	End RT	#D	%D	Score	Conf	Start RT	End RT	#D	%D	Score	Conf	Start RT	End RT	#D	%D	Score	Conf	Start RT	End RT	#D	%D	Score	Conf	Start RT	End RT	#D	%D	Score	Conf	Start RT	End RT	#D	%D	Score	Conf	Start RT
R1021C	1017	1027	YLALCHHTNLL	10.23	3	9	10.24	10.35	0.129	1.436	0.8065	Medium	10.25	10.35	0.125	1.394	0.8269	Medium	10.25	10.35	0.141	1.567	0.8077	Medium	10.25	10.35	0.354	3.932	0.8039	Medium	10.24	10.34	0.331	3.676	0.797	Medium	10.25	10.35	0.384	4.27	0.8255	Medium	10.25	10.35	0.806	8.958	0.805	Medium	10.24
R1021P does not have a viable peptide
p101 peptides
							3s						3s						3s						30s						30s						30s						300s						300s
State	Start	End	Sequence	Search RT	Charge	Max D	Start RT	End RT	#D	%D	Score	Conf	Start RT	End RT	#D	%D	Score	Conf	Start RT	End RT	#D	%D	Score	Conf	Start RT	End RT	#D	%D	Score	Conf	Start RT	End RT	#D	%D	Score	Conf	Start RT	End RT	#D	%D	Score	Conf	Start RT	End RT	#D	%D	Score	Conf	Start RT
Apo	11	26	DRIQHALERCLHGLSL	11.9	4	14	12.05	12.13	3.298	23.554	0.9134	High	12.05	12.13	3.521	25.149	0.847	Medium	12.05	12.13	3.262	23.301	0.9103	High	12.05	12.13	3.613	25.81	0.889	Medium	12.05	12.13	3.828	27.341	0.9128	High	12.06	12.14	3.545	25.32	0.9096	High	12.05	12.14	4.897	34.977	0.9194	Medium	12.14
Apo	27	36	SRRSTSWSAG	5.64	3	8	5.91	5.98	3.477	43.464	0.8305	Medium	5.92	5.98	3.44	42.995	0.8445	Medium	5.91	5.98	3.503	43.783	0.8213	Medium	5.92	5.98	3.505	43.811	0.8592	Medium	5.91	5.98	3.575	44.688	0.8381	Medium	5.91	5.98	3.429	42.864	0.8607	Medium	5.87	5.97	3.627	45.334	0.8701	Medium	5.96
Apo	42	47	WSLQEL	13.14	1	4	13.28	13.37	0.484	12.11	0.8561	Medium	13.23	13.29	0.526	13.162	0.8568	Medium	13.22	13.29	0.501	12.529	0.8276	Medium	13.23	13.29	0.909	22.731	0.851	Medium	13.22	13.29	0.775	19.376	0.8393	Medium	13.23	13.3	0.803	20.07	0.8712	Medium	13.23	13.29	1.841	46.025	0.8707	Medium	13.22
Apo	48	55	VSRDPGHF	5.94	2	5	6.15	6.22	0.721	14.41	0.7743	Medium	6.15	6.22	0.685	13.694	0.7834	Medium	6.15	6.22	0.666	13.328	0.7767	Medium	6.15	6.22	1.104	22.077	0.8005	Medium	6.15	6.22	1.142	22.843	0.8208	Medium	6.15	6.22	1.071	21.429	0.8009	Medium	6.15	6.22	1.42	28.401	0.8204	Medium	6.15
Apo	56	68	LILLEQILQKTRE	13.04	3	11	13.01	13.08	0.114	1.035	0.8019	Medium	13.02	13.08	0.036	0.331	0.8117	Medium	13.01	13.08	0.121	1.096	0.8085	Medium	13.02	13.08	0.107	0.974	0.904	Medium	13.01	13.08	0.125	1.138	0.838	Medium	13.02	13.09	0.149	1.35	0.8775	Medium	13.02	13.09	0.438	3.983	0.9039	Medium	13.01
Apo	59	68	LEQILQKTRE	6.84	3	8	7.06	7.13	0.095	1.183	0.9329	High	7.06	7.13	0.099	1.239	0.9455	High	7.06	7.13	0.096	1.199	0.9418	High	7.06	7.13	0.113	1.407	0.9455	High	7.06	7.13	0.118	1.479	0.9515	High	7.06	7.14	0.114	1.422	0.933	High	7.06	7.13	0.388	4.844	0.9393	High	7.06
Apo	59	83	LEQILQKTREVQEKGTYDLLAPLAL	12.31	4	22	12.53	12.59	0.808	3.673	0.839	Medium	12.53	12.6	0.87	3.956	0.8523	Medium	12.53	12.59	0.872	3.963	0.8399	Medium	12.53	12.6	2.583	11.741	0.8238	Medium	12.53	12.59	2.563	11.65	0.8481	Medium	12.53	12.59	2.479	11.267	0.8303	Medium	12.53	12.6	4.38	19.911	0.8319	Medium	12.53
Apo	69	78	VQEKGTYDLL	10.41	1	8	10.57	10.64	0.923	11.532	0.8416	Medium	10.57	10.64	0.797	9.959	0.8426	Medium	10.57	10.64	0.92	11.494	0.8504	Medium	10.51	10.6	1.86	23.256	0.7898	Medium	10.57	10.64	1.939	24.232	0.8296	Medium	10.57	10.64	1.885	23.559	0.8255	Medium	10.57	10.64	3.016	37.695	0.7685	Medium	10.57
Apo	69	83	VQEKGTYDLLAPLAL	13.35	2	12	13.57	13.63	0.835	6.958	0.8454	Medium	13.57	13.63	0.852	7.102	0.8619	Medium	13.57	13.64	0.775	6.462	0.8528	Medium	13.57	13.64	1.797	14.976	0.8459	Medium	13.57	13.63	1.649	13.741	0.8532	Medium	13.57	13.64	1.813	15.106	0.8588	Medium	13.57	13.64	2.653	22.109	0.8375	Medium	13.57
Apo	69	84	VQEKGTYDLLAPLALL	14.23	2	13	14.31	14.38	0.711	5.47	0.8037	Medium	14.32	14.38	0.683	5.252	0.8285	Medium	14.31	14.38	0.641	4.927	0.8106	Medium	14.32	14.38	1.514	11.646	0.7772	Medium	14.31	14.38	1.45	11.152	0.7815	Medium	14.32	14.39	1.45	11.15	0.794	Medium	14.32	14.38	2.284	17.573	0.7858	Medium	14.31
Apo	84	90	LFYSTVL	12.93	1	5	13.09	13.16	0.067	1.339	0.8774	Medium	13.09	13.16	0.067	1.348	0.8951	Medium	13.09	13.16	0.04	0.805	0.8828	Medium	13.09	13.16	0.091	1.814	0.888	Medium	13.09	13.16	0.047	0.95	0.8862	Medium	13.1	13.16	0.089	1.771	0.9009	Medium	13.09	13.16	0.097	1.937	0.8899	Medium	13.09
Apo	85	90	FYSTVL	11.25	1	4	11.44	11.5	0.07	1.749	0.73	Medium	11.44	11.51	0.139	3.48	0.7276	Medium	11.44	11.5	0.069	1.731	0.7669	Medium	11.44	11.51	0.078	1.952	0.696	Medium	11.44	11.5	0.11	2.76	0.7341	Medium	11.44	11.5	0.155	3.879	0.7249	Medium	11.44	11.51	0.087	2.175	0.689	Medium	11.44
Apo	91	101	CTPHFPPDSDL	9.64	2	6	9.89	9.97	0.891	14.849	0.9131	Medium	9.9	9.97	0.874	14.562	0.9143	Medium	9.89	9.97	0.859	14.315	0.9062	Medium	9.9	9.99	1.549	25.822	0.8255	Medium	9.89	9.97	1.554	25.895	0.9067	Medium	9.89	9.97	1.538	25.637	0.9054	Medium	9.89	9.97	1.968	32.807	0.9	Medium	9.89
Apo	91	102	CTPHFPPDSDLL	11.04	2	7	11.12	11.18	0.829	11.849	0.7971	Medium	11.12	11.18	0.881	12.579	0.8083	Medium	11.12	11.19	0.835	11.923	0.831	Medium	11.12	11.21	1.79	25.57	0.8641	Medium	11.12	11.18	1.79	25.576	0.8318	Medium	11.12	11.18	1.781	25.444	0.8784	Medium	11.12	11.18	2.438	34.829	0.8812	Medium	11.12
Apo	91	103	CTPHFPPDSDLLL	12.52	2	8	12.29	12.36	0.776	9.698	0.7682	Medium	12.29	12.36	0.754	9.426	0.788	Medium	12.29	12.36	0.779	9.74	0.7755	Medium	12.34	12.44	1.792	22.398	0.7422	Medium	12.29	12.36	1.758	21.971	0.7608	Medium	12.29	12.37	1.715	21.433	0.7947	Medium	12.3	12.36	2.429	30.366	0.7725	Medium	12.29
Apo	102	122	LLKAARTYHRFLTWPVPYCSI	11.99	4	17	11.87	11.98	0.394	2.318	0.6583	Medium	11.88	11.98	0.326	1.917	0.7471	Medium	11.87	11.98	0.418	2.458	0.7373	Medium	11.87	11.98	0.849	4.995	0.8497	Medium	11.87	11.98	0.86	5.06	0.7578	Medium	11.88	11.99	0.861	5.066	0.8749	Medium	11.88	11.99	1.702	10.009	0.8435	Medium	11.87
Apo	102	123	LLKAARTYHRFLTWPVPYCSIC	12.04	4	18	12.3	12.38	0.256	1.421	0.7332	Medium	12.3	12.38	0.255	1.417	0.7508	Medium	12.3	12.38	0.207	1.149	0.7373	Medium	12.3	12.38	0.8	4.446	0.8014	Medium	12.3	12.38	0.743	4.128	0.814	Medium	12.31	12.38	0.775	4.304	0.8238	Medium	12.31	12.38	1.554	8.635	0.7992	Medium	12.3
Apo	129	164	FIDAELKAPGISYQRLVRAEQGLSTRSHRSSTVTVL	10.51	5	33	10.53	10.6	1.289	3.905	0.8425	Medium	10.53	10.6	1.009	3.058	0.8402	Medium	10.53	10.6	1.101	3.338	0.8383	Medium	10.53	10.6	1.083	3.282	0.8786	High	10.53	10.6	1.102	3.339	0.8656	High	10.53	10.6	1.039	3.149	0.8797	High	10.53	10.6	1.373	4.162	0.866	High	10.53
Apo	134	144	LKAPGISYQRL	8.83	3	8	8.95	9.02	0.151	1.883	0.8503	Medium	8.96	9.02	0.167	2.088	0.8497	Medium	8.95	9.02	0.168	2.104	0.8239	Medium	8.95	9.02	0.162	2.031	0.7814	Medium	8.95	9.02	0.101	1.264	0.8656	Medium	8.96	9.03	0.172	2.147	0.8334	Medium	8.95	9.02	0.146	1.825	0.8332	Medium	8.95
Apo	145	162	VRAEQGLSTRSHRSSTVT	4.34	4	16	4.6	4.67	1.476	9.224	0.9047	High	4.61	4.67	1.46	9.125	0.8913	Medium	4.6	4.67	1.491	9.321	0.9126	High	4.6	4.67	1.588	9.923	0.9094	Medium	4.6	4.67	1.598	9.987	0.9262	High	4.6	4.67	1.526	9.537	0.9086	High	4.61	4.67	1.766	11.04	0.9007	Medium	4.61
Apo	145	164	VRAEQGLSTRSHRSSTVTVL	6.57	4	18	6.78	6.85	1.023	5.682	0.9392	High	6.78	6.85	1.03	5.721	0.9466	High	6.78	6.85	1.077	5.984	0.9314	High	6.78	6.85	1.068	5.936	0.9415	High	6.78	6.85	1.093	6.075	0.93	High	6.79	6.85	1.054	5.854	0.9318	High	6.78	6.85	1.338	7.436	0.9284	High	6.78
Apo	165	172	LLNPVEVQ	9.53	1	5	9.46	9.5	1.239	24.771	0.7845	Medium	9.46	9.5	1.263	25.256	0.805	Medium	9.46	9.5	1.225	24.496	0.7955	Medium	9.46	9.5	2.785	55.696	0.7536	Medium	9.46	9.5	2.751	55.016	0.7598	Medium	9.46	9.5	2.703	54.066	0.7692	Medium	9.46	9.5	3.008	60.169	0.7584	Medium	9.46
Apo	171	175	VQAEF	8.93	1	3	9.19	9.25	1.175	39.151	0.7673	Medium	9.19	9.26	1.166	38.868	0.7687	Medium	9.19	9.26	1.158	38.597	0.7687	Medium	9.23	9.32	1.385	46.162	0.6309	Medium	9.19	9.26	1.387	46.24	0.7705	Medium	9.19	9.26	1.365	45.484	0.7416	Medium	9.19	9.26	1.724	57.471	0.7502	Medium	9.19
Apo	176	193	LDVADKLSTPGPSPHSAY	8.3	2	13	8.55	8.63	2.29	17.617	0.9398	High	8.55	8.63	2.011	15.472	0.9027	High	8.55	8.63	1.955	15.039	0.9032	High	8.55	8.63	2.928	22.522	0.901	High	8.55	8.63	2.741	21.085	0.9245	High	8.56	8.63	2.753	21.178	0.9198	High	8.55	8.63	4.357	33.518	0.9246	High	8.55
Apo	177	193	DVADKLSTPGPSPHSAY	7.86	3	12	7.79	7.85	2.283	19.029	0.8528	Medium	7.79	7.86	2.271	18.923	0.8709	Medium	7.79	7.85	2.172	18.103	0.8686	Medium	7.79	7.85	3.184	26.534	0.9023	High	7.79	7.85	3.038	25.314	0.9193	High	7.79	7.86	2.971	24.756	0.9119	High	7.79	7.85	4.541	37.841	0.9178	High	7.79
Apo	197	209	LLHAFQATFGAHC	10.42	3	11	10.51	10.58	0.741	6.74	0.7572	Medium	10.52	10.58	0.633	5.753	0.8071	Medium	10.51	10.58	0.749	6.806	0.7976	Medium	10.52	10.58	0.89	8.093	0.844	Medium	10.51	10.58	0.748	6.798	0.7996	Medium	10.51	10.58	0.779	7.08	0.8542	Medium	10.51	10.58	1.005	9.139	0.8472	Medium	10.51
Apo	197	211	LLHAFQATFGAHCDL	11.57	3	13	11.74	11.81	0.732	5.633	0.7308	Medium	11.74	11.81	0.694	5.341	0.8054	Medium	11.74	11.81	0.755	5.811	0.8086	Medium	11.74	11.81	1.069	8.225	0.8494	Medium	11.74	11.81	0.99	7.614	0.8526	Medium	11.74	11.81	1.039	7.993	0.8603	Medium	11.74	11.81	1.191	9.159	0.8412	Medium	11.74
Apo	215	226	HRRLQSKTLAEL	6.57	4	10	6.8	6.87	1.346	13.462	0.8981	Medium	6.81	6.87	1.358	13.577	0.8862	Medium	6.8	6.87	1.378	13.778	0.8898	Medium	6.81	6.87	1.734	17.338	0.9085	Medium	6.8	6.87	1.75	17.504	0.8919	Medium	6.81	6.88	1.649	16.487	0.8948	Medium	6.81	6.87	2.305	23.048	0.9113	Medium	6.81
Apo	215	228	HRRLQSKTLAELEA	7.02	2	12	7.12	7.2	1.501	12.512	0.7735	Medium	7.13	7.2	1.404	11.697	0.7951	Medium	7.12	7.2	1.504	12.537	0.7843	Medium	7.12	7.2	1.832	15.263	0.7177	Medium	7.12	7.2	1.786	14.883	0.8173	Medium	7.13	7.21	1.662	13.849	0.6639	Medium	7.12	7.2	2.6	21.667	0.6907	Medium	7.12
Apo	231	238	TETAEAQE	4.24	1	6	4.5	4.57	0.043	0.72	0.8586	Medium	4.51	4.57	0.034	0.559	0.85	Medium	4.5	4.57	0.069	1.142	0.8716	Medium	4.5	4.57	0.064	1.072	0.834	Medium	4.5	4.57	0.046	0.761	0.841	Medium	4.5	4.57	0.071	1.181	0.8587	Medium	4.51	4.57	0.047	0.789	0.7928	Medium	4.5
Apo	239	248	LASGIGDAAE	7.32	1	8	7.48	7.55	1.789	22.361	0.8021	Medium	7.49	7.55	1.795	22.431	0.7974	Medium	7.48	7.55	1.824	22.799	0.7839	Medium	7.49	7.55	2.521	31.512	0.8048	Medium	7.48	7.55	2.421	30.268	0.7855	Medium	7.49	7.56	2.405	30.056	0.793	Medium	7.48	7.55	3.322	41.53	0.7479	Medium	7.49
Apo	239	257	LASGIGDAAEARQWLRTKL	11.14	3	17	11.13	11.21	1.518	8.929	0.6821	Medium	11.13	11.21	1.401	8.244	0.7064	Medium	11.13	11.21	1.496	8.799	0.7127	Medium	11.14	11.21	2.558	15.046	0.7036	Medium	11.13	11.21	2.238	13.165	0.7061	Medium	11.13	11.21	2.255	13.264	0.717	Medium	11.13	11.21	3.959	23.291	0.6889	Medium	11.13
Apo	252	257	WLRTKL	8.4	2	4	8.59	8.66	0.061	1.524	0.8497	Medium	8.59	8.66	0.041	1.028	0.8986	Medium	8.59	8.66	0.041	1.015	0.9022	Medium	8.59	8.66	0.044	1.105	0.866	Medium	8.59	8.66	0.033	0.82	0.8994	Medium	8.6	8.67	0.06	1.5	0.9106	Medium	8.59	8.66	0.12	3.009	0.8984	Medium	8.59
Apo	271	288	DTAKPGKLRTIPIPVARC	7.95	2	13	8.26	8.33	3.606	27.741	0.8678	Medium	8.26	8.33	3.654	28.106	0.869	Medium	8.26	8.33	3.581	27.543	0.8649	Medium	8.2	8.29	5.352	41.172	0.8887	High	8.26	8.33	5.156	39.658	0.8498	Medium	8.26	8.34	5.168	39.753	0.8749	High	8.26	8.33	5.896	45.352	0.8858	High	8.26
Apo	289	298	YTYSWNQDSF	12.31	1	8	12.34	12.41	2.957	36.966	0.7786	Medium	12.34	12.41	2.936	36.704	0.8298	Medium	12.34	12.41	2.938	36.722	0.8187	Medium	12.34	12.41	3.184	39.803	0.8772	Medium	12.34	12.41	3.04	37.999	0.8444	Medium	12.35	12.42	3.012	37.651	0.8777	Medium	12.35	12.41	3.492	43.645	0.8869	Medium	12.34
Apo	299	306	DILQEILL	14.55	2	6	14.62	14.7	0.301	5.012	0.7163	Medium	14.63	14.7	0.303	5.051	0.6882	Medium	14.62	14.7	0.284	4.725	0.7062	Medium	14.63	14.7	1.072	17.87	0.7682	Medium	14.62	14.7	1.087	18.109	0.6782	Medium	14.63	14.71	1.103	18.383	0.6911	Medium	14.63	14.7	2.331	38.846	0.6991	Medium	14.62
Apo	304	317	ILLKEQELLQPEIL	12.36	2	11	12.52	12.59	4.337	39.425	0.8694	Medium	12.53	12.6	4.365	39.68	0.8698	Medium	12.52	12.59	4.462	40.562	0.8738	Medium	12.52	12.6	5.593	50.845	0.8086	Medium	12.52	12.59	5.496	49.961	0.8536	Medium	12.53	12.59	5.379	48.898	0.8401	Medium	12.52	12.6	5.919	53.811	0.8322	Medium	12.52
Apo	306	317	LKEQELLQPEIL	11.51	2	9	11.79	11.86	4.144	46.043	0.9144	High	11.79	11.86	4.2	46.667	0.9072	High	11.79	11.86	4.138	45.974	0.9064	High	11.72	11.81	4.99	55.45	0.9056	High	11.79	11.86	4.876	54.172	0.9132	High	11.57	11.66	4.909	54.54	0.8168	Medium	11.79	11.86	4.988	55.419	0.8905	High	11.79
Apo	311	317	LLQPEIL	11.83	1	4	11.97	12.04	2.25	56.238	0.8753	Medium	11.98	12.04	2.314	57.853	0.8974	Medium	11.97	12.04	2.289	57.236	0.8861	Medium	11.92	12.01	2.367	59.163	0.857	Medium	12.01	12.1	2.341	58.514	0.8533	Medium	11.92	12.01	2.297	57.431	0.8845	Medium	11.98	12.05	2.359	58.971	0.8672	Medium	11.97
Apo	333	345	DADGHCAERDSVL	7.48	2	11	7.79	7.86	3.314	30.127	0.8645	Medium	7.8	7.86	3.238	29.434	0.8725	Medium	7.8	7.86	3.33	30.276	0.8753	Medium	7.8	7.86	3.39	30.815	0.8741	Medium	7.79	7.86	3.236	29.419	0.8683	Medium	7.8	7.87	3.244	29.495	0.8748	Medium	7.8	7.86	3.357	30.516	0.8629	Medium	7.8
Apo	346	359	STGSAASHASTLSL	8.77	2	12	8.94	9.02	5.087	42.39	0.7994	Medium	8.95	9.02	5.031	41.923	0.7925	Medium	8.95	9.02	5.146	42.884	0.8034	Medium	9.02	9.12	4.99	41.587	0.7809	Medium	9	9.09	4.913	40.938	0.8056	Medium	8.9	8.99	4.893	40.775	0.7938	Medium	8.95	9.02	5.121	42.674	0.7914	Medium	8.95
Apo	346	377	STGSAASHASTLSLASSQASGPTLSRQLLTSF	11.94	3	29	11.9	11.97	12.051	41.557	0.8074	Medium	11.9	11.98	11.981	41.312	0.7999	Medium	11.9	11.97	12.025	41.466	0.8108	Medium	11.9	11.98	12.042	41.523	0.8827	Medium	11.9	11.97	11.755	40.535	0.8099	Medium	11.9	11.98	11.31	38.999	0.855	Medium	11.9	11.98	11.911	41.071	0.869	Medium	11.9
Apo	360	369	ASSQASGPTL	7.65	1	7	7.94	8	3.772	53.889	0.8883	Medium	7.94	8.01	3.77	53.854	0.888	Medium	7.94	8.01	3.788	54.119	0.8813	Medium	7.94	8.01	3.866	55.234	0.897	Medium	7.94	8	3.791	54.157	0.9061	Medium	7.86	7.95	3.72	53.149	0.9061	Medium	7.94	8	3.943	56.323	0.8974	Medium	7.94
Apo	360	377	ASSQASGPTLSRQLLTSF	11.99	2	15	12.12	12.19	7.306	48.705	0.8803	High	12.12	12.19	7.255	48.368	0.8814	High	12.12	12.19	7.245	48.297	0.8758	Medium	12.12	12.19	7.203	48.018	0.8855	Medium	12.12	12.19	7.011	46.74	0.882	High	12.04	12.13	6.969	46.462	0.8625	Medium	12.12	12.2	7.112	47.41	0.8963	High	12.12
Apo	426	432	FKSTSQM	5.83	1	5	6.11	6.17	2.473	49.45	0.9132	High	6.11	6.18	2.448	48.961	0.9013	Medium	6.11	6.17	2.445	48.904	0.91	High	6.11	6.18	2.453	49.063	0.91	High	6.11	6.17	2.505	50.108	0.9063	High	6.11	6.17	2.405	48.106	0.899	Medium	6.11	6.18	2.536	50.711	0.9123	High	6.11
Apo	433	457	VLRRDSRSLEGSPDSGPPLRRAGSL	6.9	4	20	7.16	7.23	7.876	39.378	0.8909	Medium	7.16	7.23	7.67	38.348	0.8511	Medium	7.16	7.23	7.93	39.649	0.8723	Medium	7.16	7.23	7.903	39.515	0.8702	Medium	7.16	7.23	7.701	38.506	0.8505	Medium	7.16	7.24	7.428	37.14	0.8511	Medium	7.16	7.23	7.86	39.298	0.8723	Medium	7.16
Apo	435	457	RRDSRSLEGSPDSGPPLRRAGSL	6.65	5	18	6.83	6.9	7.564	42.02	0.8189	Medium	6.83	6.91	7.429	41.272	0.8276	Medium	6.83	6.91	7.489	41.608	0.8068	Medium	6.83	6.91	7.362	40.897	0.8389	Medium	6.83	6.91	7.214	40.079	0.809	Medium	6.84	6.91	7.156	39.758	0.8222	Medium	6.83	6.91	7.525	41.807	0.8733	Medium	6.83
Apo	516	523	RVVVFGSD	8.56	2	6	8.82	8.89	0.826	13.773	0.911	Medium	8.82	8.9	0.793	13.208	0.9238	High	8.82	8.89	0.823	13.719	0.917	Medium	8.82	8.9	0.838	13.972	0.892	Medium	8.82	8.89	0.812	13.536	0.916	High	8.83	8.9	0.809	13.475	0.9082	Medium	8.82	8.89	0.887	14.786	0.895	Medium	8.82
Apo	537	546	RRLENNRPLL	6.89	2	7	7.27	7.34	1.713	24.465	0.9419	High	7.28	7.34	1.712	24.464	0.9334	High	7.27	7.34	1.739	24.846	0.9322	High	7.28	7.34	2.914	41.623	0.9369	High	7.27	7.34	2.862	40.884	0.9263	High	7.28	7.35	2.737	39.1	0.9098	High	7.28	7.34	3.078	43.976	0.9027	High	7.28
Apo	537	549	RRLENNRPLLTRF	8.55	4	10	8.47	8.55	2.055	20.549	0.9097	Medium	8.48	8.55	2.034	20.344	0.9154	Medium	8.48	8.55	2.022	20.221	0.9121	Medium	8.48	8.55	4.093	40.929	0.8983	High	8.47	8.55	4.022	40.224	0.9056	Medium	8.48	8.56	3.851	38.51	0.8958	High	8.48	8.55	4.352	43.518	0.902	High	8.48
Apo	550	554	FKLQF	11.52	1	3	11.8	11.86	0.219	7.297	0.8642	Medium	11.8	11.87	0.231	7.7	0.8567	Medium	11.8	11.86	0.236	7.852	0.8696	Medium	11.8	11.87	0.681	22.71	0.8517	Medium	11.8	11.86	0.646	21.518	0.8737	Medium	11.8	11.87	0.65	21.667	0.86	Medium	11.8	11.87	0.795	26.509	0.8607	Medium	11.8
Apo	594	604	GAAPWEESTND	9.15	1	8	9.31	9.38	3.65	45.627	0.9129	Medium	9.32	9.38	3.588	44.848	0.9189	Medium	9.31	9.38	3.573	44.666	0.9215	Medium	9.32	9.38	3.524	44.049	0.8718	Medium	9.31	9.38	3.477	43.463	0.9	Medium	9.32	9.39	3.413	42.666	0.9061	Medium	9.31	9.38	3.684	46.045	0.8914	Medium	9.31
Apo	594	611	GAAPWEESTNDISHYLGM	13.4	2	15	13.51	13.58	4.51	30.065	0.8137	Medium	13.51	13.58	4.528	30.184	0.8303	Medium	13.51	13.58	4.56	30.402	0.8298	Medium	13.51	13.58	4.926	32.838	0.8177	Medium	13.51	13.57	4.814	32.093	0.8066	Medium	13.52	13.58	4.657	31.047	0.812	Medium	13.51	13.58	5.558	37.054	0.7953	Medium	13.51
Apo	594	623	GAAPWEESTNDISHYLGMLDPWYERNVLGL	14.18	3	26	14.42	14.49	4.129	15.881	0.7936	Medium	14.43	14.49	4.102	15.776	0.7714	Medium	14.42	14.49	3.756	14.448	0.7711	Medium	14.42	14.49	4.429	17.035	0.7268	Medium	14.42	14.49	4.009	15.42	0.7187	Medium	14.43	14.5	4.337	16.679	0.7419	Medium	14.43	14.49	5.977	22.987	0.7268	Medium	14.42
Apo	605	621	ISHYLGMLDPWYERNVL	13.13	3	14	13.26	13.35	1.15	8.213	0.927	High	13.2	13.27	1.152	8.23	0.9286	High	13.2	13.27	1.202	8.585	0.9229	High	13.2	13.27	1.205	8.605	0.9094	High	13.2	13.26	1.355	9.679	0.8896	High	13.21	13.27	1.331	9.509	0.88	High	13.2	13.27	1.991	14.225	0.8931	High	13.2
Apo	605	623	ISHYLGMLDPWYERNVLGL	13.71	3	16	13.93	13.99	1.462	9.139	0.8974	Medium	13.93	14	1.406	8.786	0.9076	Medium	13.93	14	1.43	8.936	0.896	Medium	13.82	13.91	1.422	8.887	0.8519	Medium	13.83	13.93	1.478	9.236	0.8172	Medium	13.82	13.91	1.394	8.712	0.9005	Medium	13.93	14	2.522	15.759	0.8651	Medium	13.93
Apo	612	623	LDPWYERNVLGL	13.4	2	9	13.41	13.5	0.847	9.412	0.8957	Medium	13.43	13.52	0.881	9.786	0.9227	Medium	13.39	13.48	0.9	9.996	0.9055	Medium	13.37	13.44	0.995	11.057	0.9	Medium	13.36	13.44	1.015	11.282	0.8856	Medium	13.37	13.45	0.936	10.395	0.9077	Medium	13.37	13.45	1.77	19.664	0.8261	Medium	13.36
Apo	622	631	GLMHLPPEVL	11.62	2	6	11.83	11.91	1.299	21.646	0.9215	High	11.83	11.91	1.283	21.384	0.9299	High	11.83	11.91	1.289	21.476	0.9309	High	11.83	11.92	2.109	35.157	0.9298	High	11.83	11.91	2.063	34.379	0.9253	High	11.74	11.83	2.045	34.082	0.9247	High	11.84	11.91	2.512	41.859	0.9344	High	11.83
Apo	624	631	MHLPPEVL	10.56	1	4	10.67	10.74	1.293	32.32	0.8445	Medium	10.67	10.74	1.264	31.596	0.8652	Medium	10.67	10.74	1.258	31.456	0.8604	Medium	10.6	10.69	2.056	51.393	0.8376	Medium	10.67	10.74	1.984	49.592	0.8559	Medium	10.63	10.71	1.981	49.517	0.6952	Medium	10.67	10.74	2.337	58.416	0.8679	Medium	10.67
Apo	632	649	CQSLKAEPRPLEGSPAQL	8.6	2	13	8.6	8.68	6.906	53.122	0.9255	High	8.6	8.68	6.893	53.024	0.9223	High	8.6	8.68	6.979	53.683	0.9254	High	8.74	8.83	7.095	54.574	0.8949	High	8.6	8.68	6.958	53.523	0.9343	High	8.52	8.62	6.897	53.05	0.9062	High	8.6	8.68	7.155	55.042	0.9246	High	8.6
Apo	632	652	CQSLKAEPRPLEGSPAQLPIL	10.88	3	15	11.12	11.19	6.618	44.118	0.9187	High	11.12	11.19	6.555	43.703	0.9183	High	11.12	11.19	6.604	44.028	0.9155	High	11.17	11.27	7.035	46.9	0.8785	High	11.12	11.19	6.854	45.692	0.9142	High	10.94	11.03	6.863	45.754	0.9156	High	11.12	11.19	7.344	48.963	0.9046	High	11.12
Apo	636	652	KAEPRPLEGSPAQLPIL	10.72	2	11	11.15	11.23	1.463	13.297	0.9074	High	11.15	11.23	1.416	12.875	0.9018	High	11.15	11.23	1.477	13.429	0.9066	High	11.15	11.23	3.269	29.719	0.8827	Medium	11.15	11.23	3.198	29.073	0.8941	Medium	11.15	11.23	3.081	28.011	0.8918	Medium	11.15	11.23	3.873	35.208	0.8825	Medium	11.15
Apo	657	662	LYYCRF	11.24	2	4	11.36	11.44	0.056	1.401	0.9324	High	11.37	11.44	0.06	1.502	0.9307	High	11.36	11.44	0.061	1.524	0.9294	High	11.36	11.44	0.065	1.623	0.9292	High	11.36	11.44	0.069	1.725	0.9229	High	11.36	11.44	0.068	1.703	0.9224	High	11.37	11.44	0.091	2.28	0.9171	High	11.36
Apo	663	668	AARPVL	7.05	1	3	7.35	7.43	0.27	8.985	0.9287	Medium	7.35	7.43	0.24	8.011	0.9309	Medium	7.35	7.43	0.258	8.612	0.9212	Medium	7.35	7.43	0.649	21.641	0.9304	Medium	7.35	7.43	0.643	21.424	0.9172	Medium	7.36	7.43	0.612	20.39	0.9289	Medium	7.25	7.34	0.866	28.875	0.9165	Medium	7.35
Apo	663	669	AARPVLL	9.32	1	4	9.31	9.39	0.292	7.31	0.8377	Medium	9.32	9.39	0.301	7.535	0.8741	Medium	9.31	9.39	0.243	6.081	0.8477	Medium	9.32	9.39	0.621	15.536	0.7725	Medium	9.31	9.39	0.684	17.102	0.8046	Medium	9.32	9.39	0.639	15.969	0.8065	Medium	9.31	9.39	0.883	22.064	0.7772	Medium	9.31
Apo	669	676	LQVYQTEL	10.55	1	6	10.77	10.84	0.101	1.676	0.9079	High	10.77	10.84	0.037	0.622	0.8984	High	10.77	10.84	0.05	0.827	0.8992	High	10.78	10.84	0.159	2.644	0.8916	High	10.77	10.84	0.118	1.975	0.8977	High	10.77	10.84	0.114	1.897	0.891	High	10.77	10.84	0.22	3.666	0.8934	High	10.77
Apo	669	677	LQVYQTELT	9.68	1	7	9.92	9.98	0.057	0.815	0.8676	Medium	9.92	9.99	0.076	1.085	0.8577	Medium	9.92	9.99	0.102	1.46	0.8624	Medium	9.92	9.99	0.127	1.819	0.8623	Medium	9.92	9.98	0.147	2.101	0.8653	Medium	9.92	9.98	0.102	1.458	0.8642	Medium	9.92	9.99	0.247	3.533	0.8494	Medium	9.92
Apo	670	677	QVYQTELT	8.26	1	6	8.49	8.56	0.046	0.769	0.8579	Medium	8.49	8.56	0.105	1.746	0.7836	Medium	8.49	8.56	0.056	0.926	0.7757	Medium	8.49	8.56	0.115	1.917	0.7865	Medium	8.49	8.56	0.058	0.963	0.8151	Medium	8.5	8.57	0.058	0.973	0.8352	Medium	8.49	8.56	0.085	1.415	0.8241	Medium	8.49
Apo	672	677	YQTELT	7.44	1	4	7.75	7.82	0.06	1.495	0.8073	Medium	7.76	7.82	0.023	0.575	0.7608	Medium	7.75	7.82	0.049	1.227	0.7741	Medium	7.75	7.82	0.059	1.469	0.8081	Medium	7.75	7.82	0.043	1.074	0.8176	Medium	7.75	7.83	0.074	1.839	0.8427	Medium	7.75	7.82	0.06	1.504	0.8149	Medium	7.75
Apo	677	686	TFITGEKTTE	7.37	1	8	7.53	7.6	1.288	16.102	0.9262	High	7.54	7.6	1.3	16.246	0.9223	High	7.54	7.6	1.316	16.455	0.9193	High	7.54	7.6	2.403	30.04	0.8997	High	7.53	7.6	2.335	29.183	0.9081	High	7.54	7.61	2.247	28.082	0.8991	High	7.54	7.6	3.245	40.559	0.9106	High	7.54
Apo	677	688	TFITGEKTTEIF	11.3	2	10	11.44	11.51	1.066	10.665	0.8674	Medium	11.45	11.52	1.059	10.595	0.859	Medium	11.45	11.51	1.056	10.561	0.8599	Medium	11.45	11.51	1.898	18.983	0.8138	Medium	11.44	11.51	1.687	16.871	0.8492	Medium	11.44	11.51	1.729	17.293	0.8139	Medium	11.45	11.52	2.548	25.482	0.7873	Medium	11.44
Apo	678	686	FITGEKTTE	6.17	1	7	6.45	6.53	1.338	19.121	0.8223	Medium	6.45	6.53	1.245	17.786	0.8321	Medium	6.45	6.53	1.311	18.722	0.8249	Medium	6.45	6.53	2.316	33.084	0.8106	Medium	6.45	6.53	2.254	32.193	0.8361	Medium	6.46	6.53	2.137	30.535	0.7831	Medium	6.45	6.53	2.764	39.491	0.7913	Medium	6.45
Apo	687	702	IFIHSLELGHSAATRA	9.01	3	14	9.1	9.17	2.404	17.17	0.7323	Medium	9.11	9.17	2.287	16.335	0.7409	Medium	9.1	9.17	2.275	16.249	0.7329	Medium	9.11	9.17	2.341	16.721	0.7351	Medium	9.1	9.17	2.339	16.71	0.7597	Medium	9.11	9.18	2.236	15.97	0.7306	Medium	9.1	9.17	2.435	17.393	0.7314	Medium	9.1
Apo	687	726	IFIHSLELGHSAATRAIKASGPGSKRLGIDGDREAVPLTL	9.64	5	36	9.9	9.98	9.736	27.046	0.8879	High	9.91	9.98	9.646	26.793	0.888	High	9.9	9.98	9.735	27.042	0.8829	High	9.9	9.98	10.325	28.68	0.876	High	9.9	9.98	9.991	27.752	0.8754	High	9.9	9.98	9.597	26.659	0.8686	High	9.9	9.98	10.54	29.277	0.8667	Medium	9.9
Apo	689	726	IHSLELGHSAATRAIKASGPGSKRLGIDGDREAVPLTL	8.88	5	34	8.96	9.04	10.425	30.663	0.8583	Medium	8.96	9.04	10.054	29.571	0.8577	Medium	8.96	9.04	10.314	30.335	0.8495	Medium	8.96	9.04	10.867	31.96	0.8371	Medium	8.96	9.04	10.634	31.277	0.8487	Medium	8.97	9.04	10.301	30.298	0.8381	Medium	8.96	9.04	10.953	32.214	0.8386	Medium	8.96
Apo	692	726	LELGHSAATRAIKASGPGSKRLGIDGDREAVPLTL	8.89	4	31	9.04	9.12	9.755	31.468	0.8127	Medium	9.05	9.12	9.429	30.418	0.8141	Medium	9.05	9.12	9.861	31.809	0.8048	Medium	9.05	9.12	10.214	32.949	0.783	Medium	9.05	9.12	10.117	32.636	0.7724	Medium	9.05	9.13	9.719	31.351	0.7778	Medium	9.05	9.12	10.502	33.878	0.7582	Medium	9.05
Apo	694	726	LGHSAATRAIKASGPGSKRLGIDGDREAVPLTL	8.51	5	29	8.55	8.63	9.422	32.488	0.8669	Medium	8.55	8.63	9.083	31.319	0.858	Medium	8.55	8.63	9.367	32.301	0.8606	Medium	8.55	8.63	10.134	34.945	0.8524	Medium	8.55	8.63	9.917	34.195	0.8623	Medium	8.56	8.63	9.519	32.826	0.8554	Medium	8.55	8.63	10.199	35.169	0.8594	Medium	8.55
Apo	745	749	EKLCT	5.21	1	3	5.48	5.54	0.4	13.346	0.798	Medium	5.48	5.55	0.416	13.859	0.7742	Medium	5.48	5.55	0.415	13.836	0.8095	Medium	5.48	5.55	1.288	42.942	0.8062	Medium	5.48	5.54	1.255	41.839	0.7985	Medium	5.48	5.54	1.214	40.473	0.8058	Medium	5.48	5.55	1.315	43.848	0.8023	Medium	5.48
Apo	750	763	SVNLSKACRQQEEL	8.02	2	12	8.26	8.32	4.551	37.921	0.9315	High	8.26	8.33	4.47	37.253	0.9337	High	8.26	8.32	4.54	37.835	0.9258	High	8.26	8.32	4.954	41.279	0.9107	High	8.26	8.32	4.918	40.986	0.94	High	8.26	8.33	4.768	39.732	0.929	High	8.26	8.32	5.083	42.36	0.9163	High	8.26
Apo	750	769	SVNLSKACRQQEELDSSTEA	7.96	3	18	8.2	8.27	7.537	41.87	0.9284	High	8.2	8.28	7.347	40.818	0.92	High	8.2	8.27	7.561	42.007	0.9156	High	8.2	8.27	8.159	45.328	0.924	High	8.2	8.27	7.847	43.594	0.9392	High	8.06	8.15	7.978	44.32	0.9161	High	8.2	8.27	8.19	45.501	0.9325	High	8.2
Apo	754	763	SKACRQQEEL	5.52	2	8	5.78	5.86	3.788	47.355	0.9029	Medium	5.78	5.86	3.853	48.168	0.9119	Medium	5.78	5.86	3.863	48.29	0.9009	Medium	5.78	5.86	3.784	47.303	0.8613	Medium	5.78	5.86	3.9	48.752	0.8928	Medium	5.78	5.85	3.685	46.061	0.8676	Medium	5.78	5.86	3.874	48.421	0.8632	Medium	5.78
Apo	768	774	EALTLNL	11.99	1	5	12.01	12.08	0.745	14.893	0.7749	Medium	12.02	12.08	0.737	14.749	0.8042	Medium	12.02	12.08	0.776	15.52	0.7994	Medium	12.02	12.08	1.322	26.447	0.7237	Medium	12.02	12.08	1.23	24.595	0.6995	Medium	12.01	12.09	1.236	24.726	0.7709	Medium	12.02	12.09	1.325	26.497	0.7988	Medium	12.08
Apo	770	774	LTLNL	11.56	1	3	11.67	11.75	0.553	18.419	0.9133	Medium	11.68	11.75	0.534	17.803	0.9218	Medium	11.67	11.75	0.534	17.811	0.9204	Medium	11.67	11.75	0.731	24.361	0.8885	Medium	11.67	11.75	0.735	24.493	0.8889	Medium	11.67	11.75	0.689	22.977	0.9147	Medium	11.68	11.75	0.729	24.316	0.8943	Medium	11.67
Apo	775	815	TEVVKRQTPKSKKGFNQISTSQIKVDKVQIIGSNSCPFAVC	9.69	5	37	9.74	9.82	5.455	14.744	0.8555	Medium	9.74	9.82	5.407	14.614	0.8549	Medium	9.74	9.82	5.369	14.511	0.8537	Medium	9.74	9.82	7.048	19.049	0.8617	Medium	9.74	9.82	6.576	17.773	0.8439	Medium	9.74	9.82	6.41	17.324	0.8494	Medium	9.74	9.82	7.421	20.057	0.8448	Medium	9.74
Apo	777	796	VVKRQTPKSKKGFNQISTSQ	4.59	4	17	4.81	4.88	7.516	44.213	0.9254	High	4.82	4.88	7.549	44.403	0.9222	Medium	4.81	4.88	7.523	44.251	0.9184	Medium	4.82	4.88	7.428	43.692	0.9227	High	4.81	4.88	7.54	44.351	0.9201	High	4.81	4.88	7.244	42.615	0.9096	Medium	4.82	4.88	7.551	44.416	0.9166	Medium	4.82
Apo	797	815	IKVDKVQIIGSNSCPFAVC	11.46	3	16	11.5	11.58	0.761	4.754	0.9136	Medium	11.51	11.58	0.78	4.875	0.9221	Medium	11.5	11.58	0.741	4.63	0.9199	Medium	11.51	11.58	0.987	6.169	0.8999	Medium	11.5	11.58	0.908	5.678	0.9103	Medium	11.5	11.58	0.945	5.905	0.9094	Medium	11.51	11.58	1.015	6.343	0.9082	Medium	11.5
Apo	816	830	LDQDERKILQSVIRC	10.93	4	13	11.07	11.13	1.528	11.752	0.9178	High	11.07	11.13	1.51	11.613	0.931	High	11.07	11.13	1.488	11.447	0.928	High	11.07	11.14	3.413	26.254	0.9291	High	11.07	11.13	3.367	25.897	0.928	High	11.07	11.13	3.24	24.927	0.9296	High	11.07	11.13	4.018	30.907	0.9271	High	11.07
Apo	817	830	DQDERKILQSVIRC	10.39	3	12	10.47	10.54	1.494	12.45	0.8567	Medium	10.47	10.54	1.481	12.344	0.8578	Medium	10.47	10.54	1.427	11.888	0.8694	Medium	10.47	10.54	3.145	26.208	0.8329	Medium	10.47	10.54	3.057	25.472	0.8451	Medium	10.47	10.54	2.976	24.801	0.8394	Medium	10.47	10.54	3.708	30.898	0.8221	Medium	10.47
Apo	821	830	RKILQSVIRC	7.8	3	8	8.02	8.1	0.714	8.924	0.8599	Medium	8.02	8.1	0.621	7.763	0.8602	Medium	8.02	8.1	0.637	7.957	0.8566	Medium	8.02	8.1	1.373	17.16	0.8528	Medium	8.02	8.1	1.366	17.072	0.8891	Medium	8.03	8.1	1.309	16.364	0.8485	Medium	8.02	8.1	1.616	20.194	0.8457	Medium	8.02
Apo	831	861	EVSPCYKPEKSSLCPPPQRPSYPPAPATPDL	8.93	4	19	8.91	8.99	8.053	42.384	0.8676	Medium	8.91	8.99	7.933	41.755	0.8557	Medium	8.91	8.99	8.055	42.396	0.8763	Medium	8.91	8.99	8.361	44.007	0.8787	High	8.91	8.99	7.993	42.067	0.8754	Medium	8.92	8.99	7.877	41.457	0.878	Medium	8.91	8.99	8.652	45.535	0.8662	High	8.91
Apo	865	877	LCLPIMTFSGALP	14.35	2	9	14.57	14.64	0.734	8.155	0.7257	Medium	14.58	14.64	0.673	7.479	0.6973	Medium	14.57	14.64	0.745	8.274	0.7331	Medium	14.58	14.64	0.94	10.441	0.7333	Medium	14.57	14.64	1.117	12.408	0.7437	Medium	14.58	14.65	1.07	11.887	0.7378	Medium	14.58	14.64	1.537	17.082	0.6992	Medium	14.57
Apo	868	877	PIMTFSGALP	12.67	2	7	12.93	13.02	0.996	14.228	0.7824	Medium	12.82	12.89	0.805	11.493	0.9063	High	12.9	12.99	0.803	11.478	0.9035	High	12.74	12.83	1.287	18.388	0.89	Medium	12.81	12.89	1.195	17.076	0.9128	High	12.82	12.89	1.136	16.226	0.8895	Medium	12.82	12.89	1.671	23.877	0.8863	High	12.81
Apo	872	877	FSGALP	9.48	1	3	9.61	9.67	0.58	19.333	0.849	Medium	9.61	9.67	0.585	19.508	0.8469	Medium	9.61	9.67	0.6	19.992	0.8589	Medium	9.61	9.68	1.102	36.748	0.8238	Medium	9.61	9.67	1.038	34.601	0.8419	Medium	9.61	9.67	1.056	35.187	0.8431	Medium	9.61	9.67	1.408	46.947	0.8256	Medium	9.61
R1021C	11	26	DRIQHALERCLHGLSL	11.9	4	14	12.05	12.13	3.586	25.611	0.912	High	12.05	12.13	3.44	24.572	0.8942	High	12.05	12.14	3.452	24.66	0.9083	High	12.05	12.13	4.329	30.924	0.8609	Medium	12.05	12.14	4.686	33.469	0.9056	Medium	12.05	12.14	4.493	32.095	0.9107	Medium	12.05	12.13	5.694	40.668	0.9152	High	12.11
R1021C	27	36	SRRSTSWSAG	5.64	3	8	5.92	5.99	3.37	42.128	0.8097	Medium	5.92	5.98	3.461	43.257	0.8177	Medium	5.92	5.98	3.419	42.736	0.8257	Medium	5.92	5.98	3.48	43.494	0.8291	Medium	5.91	5.98	3.5	43.749	0.8456	Medium	5.92	5.99	3.489	43.618	0.8516	Medium	5.91	5.98	3.508	43.853	0.8534	Medium	5.92
R1021C	42	47	WSLQEL	13.14	1	4	13.23	13.29	0.497	12.425	0.8449	Medium	13.23	13.29	0.482	12.044	0.855	Medium	13.23	13.29	0.482	12.061	0.8662	Medium	13.23	13.3	1.202	30.038	0.8537	Medium	13.23	13.3	1.258	31.44	0.8596	Medium	13.23	13.29	1.239	30.982	0.8679	Medium	13.23	13.29	2.05	51.253	0.8696	Medium	13.23
R1021C	48	55	VSRDPGHF	5.94	2	5	6.15	6.22	0.687	13.739	0.7873	Medium	6.15	6.22	0.723	14.466	0.7713	Medium	6.15	6.22	0.707	14.144	0.7684	Medium	6.15	6.22	1.184	23.686	0.7934	Medium	6.15	6.22	1.195	23.896	0.8026	Medium	6.16	6.22	1.137	22.75	0.7989	Medium	6.15	6.22	1.414	28.277	0.7785	Medium	6.16
R1021C	56	68	LILLEQILQKTRE	13.04	3	11	13.02	13.08	0.049	0.444	0.7955	Medium	13.02	13.08	0.076	0.69	0.8278	Medium	13.02	13.08	0.029	0.261	0.8361	Medium	13.02	13.09	0.168	1.524	0.8771	Medium	13.02	13.09	0.164	1.486	0.8522	Medium	13.02	13.09	0.144	1.311	0.8648	Medium	13.02	13.08	0.47	4.273	0.8854	Medium	13.02
R1021C	59	68	LEQILQKTRE	6.84	3	8	7.06	7.14	0.099	1.24	0.9478	High	7.06	7.13	0.104	1.302	0.9348	High	7.06	7.13	0.103	1.287	0.9438	High	7.06	7.14	0.145	1.807	0.9358	High	7.06	7.14	0.163	2.041	0.9292	High	7.06	7.14	0.15	1.876	0.9285	High	7.06	7.13	0.429	5.365	0.9239	High	7.06
R1021C	59	83	LEQILQKTREVQEKGTYDLLAPLAL	12.31	4	22	12.53	12.6	0.833	3.788	0.8532	Medium	12.53	12.6	0.796	3.618	0.8418	Medium	12.53	12.6	0.85	3.862	0.8353	Medium	12.53	12.59	2.662	12.098	0.813	Medium	12.53	12.6	2.873	13.058	0.8333	Medium	12.53	12.6	2.863	13.012	0.8255	Medium	12.53	12.6	4.287	19.486	0.8057	Medium	12.53
R1021C	69	78	VQEKGTYDLL	10.41	1	8	10.57	10.64	0.795	9.937	0.8385	Medium	10.57	10.64	0.749	9.36	0.8465	Medium	10.58	10.64	0.788	9.853	0.8305	Medium	10.57	10.64	2.197	27.457	0.8143	Medium	10.57	10.65	2.228	27.852	0.8295	Medium	10.58	10.64	2.231	27.882	0.8015	Medium	10.57	10.64	2.953	36.907	0.7785	Medium	10.58
R1021C	69	83	VQEKGTYDLLAPLAL	13.35	2	12	13.57	13.64	0.815	6.788	0.8597	Medium	13.57	13.64	0.692	5.764	0.8557	Medium	13.57	13.64	0.802	6.685	0.8581	Medium	13.57	13.64	1.898	15.821	0.8337	Medium	13.57	13.64	1.912	15.93	0.856	Medium	13.57	13.64	1.914	15.951	0.843	Medium	13.57	13.64	2.64	21.997	0.845	Medium	13.57
R1021C	69	84	VQEKGTYDLLAPLALL	14.23	2	13	14.32	14.38	0.725	5.577	0.8448	Medium	14.32	14.38	0.638	4.906	0.8272	Medium	14.32	14.38	0.707	5.436	0.8315	Medium	14.32	14.39	1.685	12.96	0.7959	Medium	14.32	14.39	1.818	13.984	0.8185	Medium	14.31	14.38	1.761	13.549	0.8145	Medium	14.32	14.38	2.322	17.86	0.7902	Medium	14.32
R1021C	84	90	LFYSTVL	12.93	1	5	13.09	13.16	0.051	1.022	0.8873	Medium	13.09	13.16	0.04	0.8	0.8806	Medium	13.09	13.16	0.06	1.205	0.8917	Medium	13.1	13.16	0.082	1.636	0.8838	Medium	13.1	13.16	0.09	1.801	0.8967	Medium	13.09	13.16	0.062	1.236	0.8914	Medium	13.09	13.16	0.066	1.322	0.8862	Medium	13.09
R1021C	85	90	FYSTVL	11.25	1	4	11.44	11.5	0.103	2.579	0.7545	Medium	11.44	11.51	0.062	1.539	0.7656	Medium	11.44	11.51	0.057	1.434	0.7639	Medium	11.44	11.5	0.092	2.295	0.6948	Medium	11.44	11.5	0.049	1.227	0.7501	Medium	11.44	11.51	0.133	3.33	0.7262	Medium	11.44	11.51	0.095	2.37	0.7086	Medium	11.44
R1021C	91	101	CTPHFPPDSDL	9.64	2	6	9.89	9.97	0.885	14.757	0.9056	Medium	9.89	9.97	0.866	14.43	0.9089	Medium	9.89	9.97	0.863	14.39	0.916	Medium	9.9	9.97	1.687	28.109	0.9002	Medium	9.9	9.97	1.665	27.749	0.9084	Medium	9.9	9.97	1.688	28.129	0.8973	Medium	9.9	9.97	1.957	32.613	0.8994	Medium	9.9
R1021C	91	102	CTPHFPPDSDLL	11.04	2	7	11.12	11.19	0.836	11.939	0.8267	Medium	11.12	11.19	0.776	11.083	0.8486	Medium	11.12	11.19	0.823	11.754	0.8542	Medium	11.12	11.18	1.955	27.935	0.8447	Medium	11.12	11.19	1.942	27.741	0.8441	Medium	11.12	11.19	1.96	28.002	0.8617	Medium	11.12	11.19	2.392	34.176	0.875	Medium	11.12
R1021C	91	103	CTPHFPPDSDLLL	12.52	2	8	12.29	12.36	0.774	9.676	0.7368	Medium	12.29	12.36	0.807	10.09	0.782	Medium	12.29	12.36	0.75	9.372	0.805	Medium	12.29	12.36	1.864	23.298	0.7849	Medium	12.3	12.36	1.906	23.825	0.7858	Medium	12.3	12.36	1.9	23.75	0.7924	Medium	12.29	12.36	2.308	28.854	0.766	Medium	12.3
R1021C	102	122	LLKAARTYHRFLTWPVPYCSI	11.99	4	17	11.87	11.98	0.367	2.159	0.7093	Medium	11.87	11.98	0.475	2.791	0.7722	Medium	11.88	11.98	0.395	2.324	0.8221	Medium	11.87	11.98	1.015	5.971	0.799	Medium	11.88	11.99	0.968	5.697	0.804	Medium	11.88	11.99	1.042	6.129	0.8343	Medium	11.88	11.98	1.806	10.622	0.8128	Medium	11.88
R1021C	102	123	LLKAARTYHRFLTWPVPYCSIC	12.04	4	18	12.3	12.38	0.291	1.615	0.7867	Medium	12.3	12.38	0.276	1.535	0.7948	Medium	12.3	12.38	0.282	1.566	0.8015	Medium	12.3	12.37	0.786	4.367	0.7837	Medium	12.3	12.38	0.988	5.488	0.8093	Medium	12.31	12.38	0.851	4.729	0.7898	Medium	12.3	12.38	1.742	9.68	0.7818	Medium	12.31
R1021C	129	164	FIDAELKAPGISYQRLVRAEQGLSTRSHRSSTVTVL	10.51	5	33	10.53	10.6	1.223	3.706	0.838	Medium	10.53	10.6	1.129	3.423	0.8429	Medium	10.53	10.6	1.04	3.152	0.847	Medium	10.53	10.6	1.292	3.916	0.8404	Medium	10.53	10.6	1.263	3.828	0.8195	Medium	10.54	10.6	1.26	3.819	0.8289	Medium	10.53	10.6	1.611	4.881	0.8435	Medium	10.54
R1021C	134	144	LKAPGISYQRL	8.83	3	8	8.96	9.03	0.149	1.866	0.8494	Medium	8.95	9.02	0.16	2.006	0.8334	Medium	8.96	9.02	0.129	1.612	0.8332	Medium	8.96	9.03	0.143	1.784	0.8388	Medium	8.95	9.02	0.172	2.146	0.8469	Medium	8.96	9.03	0.187	2.336	0.8174	Medium	8.96	9.02	0.161	2.015	0.8057	Medium	8.96
R1021C	145	162	VRAEQGLSTRSHRSSTVT	4.34	4	16	4.61	4.68	1.633	10.209	0.9167	Medium	4.61	4.67	1.643	10.267	0.9078	Medium	4.61	4.67	1.504	9.402	0.9135	Medium	4.61	4.67	1.766	11.037	0.9056	High	4.6	4.67	1.65	10.312	0.8995	High	4.6	4.67	1.78	11.127	0.9091	High	4.6	4.67	2.043	12.766	0.8973	Medium	4.6
R1021C	145	164	VRAEQGLSTRSHRSSTVTVL	6.57	4	18	6.78	6.85	1.067	5.925	0.9314	High	6.78	6.85	1.061	5.897	0.9414	High	6.78	6.85	1.013	5.629	0.9231	High	6.79	6.85	1.273	7.074	0.9279	High	6.79	6.85	1.209	6.718	0.9176	High	6.79	6.85	1.27	7.055	0.9153	High	6.78	6.85	1.523	8.463	0.9116	High	6.79
R1021C	165	172	LLNPVEVQ	9.53	1	5	9.46	9.5	1.189	23.778	0.7982	Medium	9.46	9.5	1.189	23.777	0.7869	Medium	9.46	9.5	1.163	23.255	0.8045	Medium	9.46	9.5	2.81	56.194	0.7687	Medium	9.46	9.5	2.78	55.595	0.7738	Medium	9.46	9.5	2.811	56.225	0.7725	Medium	9.46	9.5	2.945	58.9	0.777	Medium	9.46
R1021C	171	175	VQAEF	8.93	1	3	9.19	9.25	1.167	38.9	0.7792	Medium	9.19	9.26	1.148	38.277	0.7828	Medium	9.19	9.26	1.151	38.374	0.7824	Medium	9.19	9.26	1.507	50.232	0.7646	Medium	9.19	9.25	1.489	49.626	0.7922	Medium	9.19	9.26	1.47	49.013	0.7547	Medium	9.19	9.26	1.704	56.801	0.7619	Medium	9.19
R1021C	176	193	LDVADKLSTPGPSPHSAY	8.3	2	13	8.56	8.63	2.044	15.725	0.9001	High	8.55	8.63	2.177	16.745	0.9282	High	8.55	8.63	2.162	16.634	0.9244	High	8.56	8.63	3.295	25.345	0.9102	High	8.55	8.63	3.19	24.542	0.9085	High	8.56	8.63	3.225	24.804	0.9059	High	8.55	8.63	4.611	35.472	0.9247	High	8.56
R1021C	177	193	DVADKLSTPGPSPHSAY	7.86	3	12	7.79	7.86	2.201	18.344	0.8561	Medium	7.79	7.85	2.221	18.506	0.8555	Medium	7.79	7.86	2.274	18.949	0.8542	Medium	7.79	7.86	3.421	28.511	0.8774	Medium	7.79	7.85	3.386	28.215	0.8673	Medium	7.79	7.86	3.386	28.218	0.8735	Medium	7.79	7.86	4.712	39.263	0.8836	Medium	7.79
R1021C	197	209	LLHAFQATFGAHC	10.42	3	11	10.51	10.58	0.72	6.545	0.7624	Medium	10.51	10.58	0.722	6.56	0.7916	Medium	10.52	10.58	0.686	6.234	0.7965	Medium	10.51	10.58	0.841	7.643	0.8243	Medium	10.51	10.59	0.782	7.113	0.8132	Medium	10.52	10.59	0.776	7.053	0.8385	Medium	10.52	10.58	1.055	9.587	0.8396	Medium	10.52
R1021C	197	211	LLHAFQATFGAHCDL	11.57	3	13	11.74	11.81	0.664	5.104	0.7709	Medium	11.74	11.81	0.652	5.018	0.8023	Medium	11.74	11.81	0.709	5.454	0.822	Medium	11.74	11.8	1.093	8.408	0.8509	Medium	11.75	11.81	1.065	8.19	0.8524	Medium	11.74	11.81	1.077	8.287	0.8529	Medium	11.74	11.81	1.253	9.64	0.846	Medium	11.74
R1021C	215	226	HRRLQSKTLAEL	6.57	4	10	6.81	6.88	1.344	13.441	0.9015	Medium	6.81	6.87	1.318	13.176	0.8915	Medium	6.81	6.87	1.331	13.31	0.8905	Medium	6.81	6.88	1.77	17.698	0.9157	Medium	6.81	6.88	1.8	18.004	0.8994	Medium	6.81	6.88	1.824	18.24	0.8982	Medium	6.8	6.87	2.257	22.572	0.9067	Medium	6.81
R1021C	215	228	HRRLQSKTLAELEA	7.02	2	12	7.13	7.2	1.401	11.676	0.7987	Medium	7.12	7.2	1.406	11.72	0.7645	Medium	7.13	7.2	1.432	11.935	0.7659	Medium	7.13	7.2	1.773	14.774	0.7018	Medium	7.13	7.2	1.81	15.087	0.8269	Medium	7.13	7.2	1.744	14.536	0.6383	Medium	7.12	7.2	2.449	20.409	0.6813	Medium	7.13
R1021C	231	238	TETAEAQE	4.24	1	6	4.51	4.57	0.149	2.477	0.838	Medium	4.5	4.57	0.105	1.742	0.8448	Medium	4.51	4.57	0.059	0.991	0.8304	Medium	4.51	4.57	0.007	0.116	0.8108	Medium	4.5	4.57	0.088	1.464	0.821	Medium	4.5	4.57	0.131	2.189	0.8264	Medium	4.5	4.57	0.096	1.6	0.8215	Medium	4.5
R1021C	239	248	LASGIGDAAE	7.32	1	8	7.49	7.56	1.791	22.385	0.7944	Medium	7.49	7.55	1.815	22.683	0.7915	Medium	7.49	7.55	1.741	21.763	0.8122	Medium	7.49	7.56	2.388	29.849	0.7913	Medium	7.49	7.55	2.567	32.085	0.7781	Medium	7.49	7.56	2.464	30.802	0.7807	Medium	7.48	7.55	3.316	41.456	0.7709	Medium	7.49
R1021C	239	257	LASGIGDAAEARQWLRTKL	11.14	3	17	11.13	11.21	1.401	8.243	0.706	Medium	11.14	11.21	1.407	8.275	0.7058	Medium	11.14	11.21	1.435	8.438	0.7324	Medium	11.13	11.21	2.425	14.263	0.692	Medium	11.14	11.21	2.464	14.493	0.7234	Medium	11.14	11.22	2.418	14.226	0.7241	Medium	11.14	11.21	3.81	22.41	0.6709	Medium	11.14
R1021C	252	257	WLRTKL	8.4	2	4	8.6	8.67	0.035	0.877	0.8644	Medium	8.59	8.66	0.059	1.463	0.8979	Medium	8.59	8.66	0.008	0.209	0.8934	Medium	8.6	8.67	0.067	1.663	0.903	Medium	8.6	8.66	0.045	1.136	0.8934	Medium	8.6	8.67	0.052	1.297	0.9044	Medium	8.59	8.66	0.145	3.629	0.9018	Medium	8.6
R1021C	271	288	DTAKPGKLRTIPIPVARC	7.95	2	13	8.26	8.34	3.481	26.774	0.8679	Medium	8.26	8.33	3.538	27.217	0.8515	Medium	8.26	8.33	3.502	26.935	0.8704	Medium	8.26	8.34	5.295	40.731	0.844	Medium	8.26	8.34	5.252	40.399	0.8584	Medium	8.26	8.34	5.318	40.906	0.8516	Medium	8.26	8.34	5.896	45.356	0.832	Medium	8.26
R1021C	289	298	YTYSWNQDSF	12.31	1	8	12.34	12.41	3.019	37.736	0.7683	Medium	12.34	12.41	2.901	36.269	0.8034	Medium	12.35	12.41	2.894	36.177	0.838	Medium	12.34	12.41	3.207	40.09	0.862	Medium	12.35	12.41	3.078	38.474	0.887	Medium	12.35	12.41	3.186	39.824	0.8734	Medium	12.34	12.41	3.426	42.831	0.8795	Medium	12.35
R1021C	299	306	DILQEILL	14.55	2	6	14.63	14.7	0.318	5.298	0.6982	Medium	14.63	14.7	0.301	5.021	0.7199	Medium	14.63	14.7	0.416	6.941	0.6954	Medium	14.63	14.71	1.173	19.542	0.7354	Medium	14.63	14.7	1.168	19.47	0.6775	Medium	14.62	14.7	1.281	21.35	0.6777	Medium	14.63	14.7	2.353	39.214	0.7257	Medium	14.63
R1021C	304	317	ILLKEQELLQPEIL	12.36	2	11	12.52	12.6	4.379	39.808	0.8798	Medium	12.52	12.6	4.202	38.202	0.869	Medium	12.52	12.6	4.242	38.561	0.8815	Medium	12.53	12.59	5.61	50.996	0.8274	Medium	12.52	12.6	5.531	50.284	0.8593	Medium	12.52	12.6	5.617	51.06	0.8425	Medium	12.52	12.6	5.801	52.735	0.8265	Medium	12.52
R1021C	306	317	LKEQELLQPEIL	11.51	2	9	11.79	11.86	4.022	44.69	0.9093	High	11.79	11.86	3.984	44.27	0.9173	High	11.79	11.86	4.014	44.604	0.9108	High	11.79	11.85	4.922	54.686	0.8971	High	11.8	11.86	4.865	54.052	0.9098	High	11.79	11.86	4.955	55.054	0.9018	High	11.79	11.86	4.854	53.93	0.8894	High	11.79
R1021C	311	317	LLQPEIL	11.83	1	4	11.97	12.04	2.236	55.912	0.8848	Medium	11.98	12.04	2.228	55.711	0.9046	Medium	11.98	12.04	2.227	55.67	0.8901	Medium	11.97	12.04	2.37	59.256	0.885	Medium	11.98	12.05	2.339	58.478	0.8829	Medium	11.98	12.05	2.343	58.577	0.8766	Medium	11.98	12.04	2.329	58.237	0.8685	Medium	11.98
R1021C	333	345	DADGHCAERDSVL	7.48	2	11	7.8	7.87	3.32	30.186	0.8903	Medium	7.8	7.86	3.219	29.266	0.862	Medium	7.8	7.86	3.303	30.027	0.8617	Medium	7.8	7.87	3.349	30.449	0.8145	Medium	7.8	7.86	3.302	30.015	0.849	Medium	7.8	7.87	3.321	30.189	0.8213	Medium	7.8	7.87	3.295	29.953	0.8301	Medium	7.8
R1021C	346	359	STGSAASHASTLSL	8.77	2	12	8.95	9.03	5.029	41.908	0.7931	Medium	8.95	9.02	5.094	42.447	0.785	Medium	8.95	9.02	5.023	41.86	0.8119	Medium	8.95	9.03	5.038	41.986	0.8006	Medium	8.95	9.02	5.063	42.194	0.7938	Medium	8.95	9.03	5.005	41.704	0.8012	Medium	8.95	9.02	5.041	42.012	0.7894	Medium	8.95
R1021C	346	377	STGSAASHASTLSLASSQASGPTLSRQLLTSF	11.94	3	29	11.9	11.97	12.149	41.894	0.7265	Medium	11.9	11.98	11.821	40.761	0.807	Medium	11.9	11.98	12.01	41.415	0.7848	Medium	11.9	11.97	12.018	41.441	0.8566	Medium	11.9	11.98	11.654	40.187	0.8247	Medium	11.9	11.98	11.826	40.779	0.8417	Medium	11.9	11.98	11.76	40.553	0.8639	Medium	11.9
R1021C	360	369	ASSQASGPTL	7.65	1	7	7.94	8.01	3.759	53.694	0.8942	Medium	7.94	8.01	3.73	53.283	0.8814	Medium	7.94	8.01	3.79	54.148	0.8846	Medium	7.94	8.01	3.787	54.095	0.8821	Medium	7.94	8	3.819	54.553	0.8738	Medium	7.94	8.01	3.786	54.086	0.8755	Medium	7.94	8.01	3.851	55.017	0.8826	Medium	7.94
R1021C	360	377	ASSQASGPTLSRQLLTSF	11.99	2	15	12.12	12.19	7.294	48.624	0.8717	High	12.12	12.19	7.151	47.671	0.8771	Medium	12.12	12.19	7.083	47.221	0.8717	Medium	12.11	12.19	7.134	47.557	0.8902	Medium	12.12	12.2	6.951	46.342	0.8962	High	12.12	12.2	7.054	47.026	0.8903	High	12.12	12.19	6.955	46.367	0.8858	Medium	12.12
R1021C	426	432	FKSTSQM	5.83	1	5	6.11	6.18	2.43	48.594	0.9153	High	6.11	6.18	2.441	48.827	0.9102	Medium	6.11	6.18	2.439	48.781	0.9029	Medium	6.11	6.18	2.409	48.183	0.9082	Medium	6.11	6.18	2.484	49.689	0.9121	High	6.11	6.18	2.476	49.528	0.9031	Medium	6.11	6.17	2.461	49.224	0.9094	Medium	6.11
R1021C	433	457	VLRRDSRSLEGSPDSGPPLRRAGSL	6.9	4	20	7.16	7.24	7.707	38.534	0.8765	Medium	7.16	7.23	7.77	38.849	0.8719	Medium	7.16	7.23	7.642	38.212	0.8571	Medium	7.16	7.24	7.712	38.56	0.8559	Medium	7.16	7.24	7.691	38.456	0.8486	Medium	7.16	7.24	7.783	38.916	0.8486	Medium	7.16	7.23	7.723	38.614	0.8579	Medium	7.16
R1021C	435	457	RRDSRSLEGSPDSGPPLRRAGSL	6.65	5	18	6.83	6.91	7.357	40.872	0.8245	Medium	6.83	6.91	7.477	41.537	0.8095	Medium	6.83	6.91	7.318	40.653	0.8345	Medium	6.84	6.91	7.248	40.266	0.8525	Medium	6.84	6.91	7.421	41.227	0.8077	Medium	6.84	6.91	7.229	40.162	0.8301	Medium	6.83	6.9	7.246	40.257	0.8537	Medium	6.84
R1021C	516	523	RVVVFGSD	8.56	2	6	8.83	8.9	0.808	13.465	0.9206	Medium	8.82	8.9	0.829	13.808	0.9177	Medium	8.82	8.9	0.793	13.211	0.9205	High	8.82	8.9	0.883	14.715	0.8922	Medium	8.82	8.9	0.864	14.406	0.9036	Medium	8.82	8.9	0.874	14.568	0.9025	Medium	8.82	8.9	0.974	16.229	0.8867	Medium	8.82
R1021C	537	546	RRLENNRPLL	6.89	2	7	7.28	7.35	1.64	23.434	0.9359	High	7.28	7.34	1.653	23.621	0.9307	High	7.28	7.34	1.639	23.411	0.9222	High	7.28	7.35	2.822	40.318	0.9244	High	7.28	7.35	2.874	41.063	0.9214	High	7.28	7.35	2.873	41.04	0.9171	High	7.27	7.34	2.986	42.652	0.9267	High	7.28
R1021C	537	549	RRLENNRPLLTRF	8.55	4	10	8.48	8.56	1.988	19.881	0.8996	Medium	8.48	8.55	1.928	19.283	0.909	Medium	8.48	8.55	1.949	19.486	0.9135	Medium	8.48	8.56	4.028	40.277	0.9137	Medium	8.48	8.55	4.073	40.726	0.9043	Medium	8.48	8.56	4.019	40.188	0.8932	Medium	8.48	8.55	4.288	42.884	0.8997	Medium	8.48
R1021C	550	554	FKLQF	11.52	1	3	11.8	11.87	0.216	7.199	0.8642	Medium	11.8	11.87	0.186	6.192	0.8616	Medium	11.8	11.87	0.168	5.615	0.8571	Medium	11.8	11.86	0.692	23.069	0.8637	Medium	11.8	11.87	0.693	23.114	0.8702	Medium	11.8	11.87	0.715	23.823	0.8629	Medium	11.8	11.87	0.855	28.502	0.8606	Medium	11.8
R1021C	594	604	GAAPWEESTND	9.15	1	8	9.31	9.38	3.633	45.412	0.9119	Medium	9.32	9.38	3.57	44.624	0.9176	Medium	9.32	9.38	3.461	43.262	0.9084	Medium	9.32	9.39	3.608	45.1	0.8958	Medium	9.31	9.38	3.503	43.784	0.9093	Medium	9.32	9.39	3.588	44.848	0.9076	Medium	9.32	9.38	3.557	44.459	0.9101	Medium	9.32
R1021C	594	611	GAAPWEESTNDISHYLGM	13.4	2	15	13.51	13.58	4.639	30.929	0.808	Medium	13.51	13.58	4.543	30.29	0.8141	Medium	13.51	13.58	4.632	30.883	0.8201	Medium	13.52	13.58	5.238	34.922	0.7998	Medium	13.51	13.58	5.103	34.021	0.7839	Medium	13.51	13.58	5.223	34.822	0.8074	Medium	13.51	13.58	5.874	39.161	0.7868	Medium	13.51
R1021C	594	623	GAAPWEESTNDISHYLGMLDPWYERNVLGL	14.18	3	26	14.43	14.49	4.262	16.394	0.7878	Medium	14.42	14.49	4.161	16.002	0.7882	Medium	14.43	14.49	4.1	15.771	0.7641	Medium	14.43	14.5	5.955	22.903	0.7406	Medium	14.43	14.49	5.61	21.577	0.7204	Medium	14.42	14.49	5.727	22.027	0.7213	Medium	14.42	14.49	7.866	30.252	0.737	Medium	14.43
R1021C	605	621	ISHYLGMLDPWYERNVL	13.13	3	14	13.2	13.27	1.667	11.909	0.8623	Medium	13.26	13.35	1.603	11.449	0.9056	High	13.2	13.27	1.832	13.088	0.7932	Medium	13.2	13.27	2.158	15.416	0.9016	High	13.2	13.27	2.185	15.608	0.8855	Medium	13.2	13.27	2.051	14.647	0.8749	High	13.2	13.27	3.148	22.483	0.874	Medium	13.2
R1021C	605	623	ISHYLGMLDPWYERNVLGL	13.71	3	16	13.93	14	1.535	9.591	0.9051	Medium	13.93	14	1.455	9.096	0.8944	Medium	13.93	14	1.549	9.679	0.9035	Medium	13.93	14	2.346	14.662	0.894	Medium	13.93	14	2.457	15.358	0.9061	Medium	13.93	14	2.393	14.956	0.9026	Medium	13.93	14	3.714	23.213	0.8976	Medium	13.93
R1021C	612	623	LDPWYERNVLGL	13.4	2	9	13.43	13.52	1.034	11.491	0.9199	Medium	13.42	13.5	0.904	10.043	0.8931	Medium	13.44	13.52	0.982	10.911	0.9239	Medium	13.37	13.45	1.544	17.157	0.8599	Medium	13.37	13.45	1.619	17.987	0.9026	Medium	13.37	13.45	1.652	18.356	0.8775	Medium	13.37	13.44	2.43	27	0.8554	Medium	13.37
R1021C	622	631	GLMHLPPEVL	11.62	2	6	11.83	11.91	1.259	20.989	0.9279	High	11.83	11.91	1.23	20.495	0.9191	High	11.83	11.91	1.26	21.004	0.934	High	11.83	11.91	2.159	35.984	0.9272	High	11.84	11.91	2.159	35.989	0.9338	High	11.84	11.91	2.188	36.469	0.9263	High	11.83	11.91	2.513	41.881	0.9346	High	11.84
R1021C	624	631	MHLPPEVL	10.56	1	4	10.67	10.74	1.239	30.971	0.8644	Medium	10.67	10.74	1.262	31.546	0.8618	Medium	10.68	10.74	1.266	31.662	0.8664	Medium	10.67	10.74	2.052	51.305	0.8555	Medium	10.68	10.75	2.034	50.858	0.8532	Medium	10.68	10.75	2.052	51.299	0.8638	Medium	10.68	10.74	2.268	56.692	0.8588	Medium	10.68
R1021C	632	649	CQSLKAEPRPLEGSPAQL	8.6	2	13	8.61	8.68	6.758	51.984	0.9174	High	8.6	8.68	6.812	52.401	0.9176	High	8.6	8.68	6.837	52.595	0.9198	High	8.61	8.68	7.073	54.404	0.9251	High	8.6	8.68	6.958	53.523	0.9162	High	8.61	8.68	7.045	54.192	0.9171	High	8.6	8.68	7.021	54.004	0.9229	High	8.61
R1021C	632	652	CQSLKAEPRPLEGSPAQLPIL	10.88	3	15	11.12	11.19	6.499	43.326	0.9124	High	11.12	11.19	6.507	43.378	0.9201	High	11.12	11.2	6.501	43.339	0.9035	High	11.12	11.19	7.074	47.157	0.9149	High	11.12	11.2	6.952	46.349	0.9102	High	11.12	11.2	7.07	47.13	0.9072	High	11.12	11.2	7.258	48.387	0.9002	High	11.12
R1021C	636	652	KAEPRPLEGSPAQLPIL	10.72	2	11	11.15	11.23	1.275	11.588	0.905	High	11.15	11.23	1.251	11.37	0.9031	High	11.15	11.23	1.249	11.356	0.9037	High	11.15	11.23	3.122	28.38	0.8965	Medium	11.15	11.23	3.205	29.134	0.901	Medium	11.16	11.23	3.145	28.588	0.8877	Medium	11.15	11.23	3.645	33.134	0.8837	Medium	11.16
R1021C	657	662	LYYCRF	11.24	2	4	11.36	11.44	0.083	2.074	0.9312	High	11.36	11.44	0.072	1.789	0.929	High	11.36	11.44	0.067	1.664	0.9361	High	11.36	11.44	0.096	2.404	0.9042	High	11.36	11.44	0.105	2.615	0.906	High	11.37	11.44	0.133	3.317	0.9093	High	11.36	11.44	0.301	7.519	0.9079	High	11.45
R1021C	663	668	AARPVL	7.05	1	3	7.36	7.43	0.268	8.924	0.9233	Medium	7.35	7.43	0.259	8.647	0.9332	Medium	7.35	7.43	0.278	9.267	0.9257	Medium	7.36	7.43	0.686	22.869	0.9265	Medium	7.35	7.43	0.749	24.967	0.9061	Medium	7.36	7.43	0.729	24.296	0.9286	Medium	7.35	7.42	0.905	30.18	0.9171	Medium	7.36
R1021C	663	669	AARPVLL	9.32	1	4	9.31	9.39	0.294	7.338	0.8475	Medium	9.32	9.39	0.267	6.664	0.8278	Medium	9.32	9.39	0.233	5.832	0.8345	Medium	9.32	9.4	0.717	17.923	0.7813	Medium	9.31	9.39	0.985	24.634	0.7688	Medium	9.32	9.39	0.75	18.757	0.7975	Medium	9.32	9.39	0.821	20.535	0.7601	Medium	9.32
R1021C	669	676	LQVYQTEL	10.55	1	6	10.77	10.84	0.039	0.648	0.8992	High	10.78	10.84	0.039	0.645	0.9036	High	10.78	10.84	0.077	1.289	0.9009	High	10.77	10.84	0.172	2.867	0.9007	High	10.78	10.85	0.192	3.2	0.8943	High	10.78	10.85	0.221	3.681	0.8918	High	10.78	10.84	0.337	5.616	0.9054	High	10.78
R1021C	669	677	LQVYQTELT	9.68	1	7	9.92	9.98	0.073	1.049	0.8636	Medium	9.92	9.99	0.06	0.858	0.8605	Medium	9.92	9.99	0.056	0.798	0.8561	Medium	9.92	9.99	0.22	3.144	0.8564	Medium	9.92	9.99	0.255	3.638	0.8666	Medium	9.92	9.99	0.177	2.529	0.8479	Medium	9.92	9.99	0.279	3.979	0.8457	Medium	9.92
R1021C	670	677	QVYQTELT	8.26	1	6	8.5	8.56	0.047	0.788	0.804	Medium	8.49	8.56	0.013	0.211	0.7894	Medium	8.49	8.56	0.079	1.318	0.7965	Medium	8.5	8.56	0.171	2.849	0.7704	Medium	8.5	8.56	0.165	2.755	0.7593	Medium	8.5	8.56	0.161	2.677	0.69	Medium	8.49	8.56	0.237	3.956	0.7684	Medium	8.5
R1021C	672	677	YQTELT	7.44	1	4	7.76	7.83	0.052	1.298	0.7798	Medium	7.75	7.82	0.066	1.647	0.7686	Medium	7.75	7.82	0.036	0.908	0.7589	Medium	7.76	7.83	0.111	2.787	0.7179	Medium	7.75	7.82	0.076	1.906	0.7678	Medium	7.76	7.83	0.087	2.174	0.691	Medium	7.75	7.83	0.046	1.154	0.7038	Medium	7.76
R1021C	677	686	TFITGEKTTE	7.37	1	8	7.54	7.61	1.215	15.189	0.9278	High	7.54	7.6	1.213	15.158	0.9123	High	7.54	7.6	1.234	15.426	0.9104	High	7.54	7.61	2.325	29.068	0.9046	High	7.54	7.6	2.41	30.123	0.9117	High	7.54	7.61	2.391	29.888	0.8928	High	7.53	7.6	3.147	39.336	0.9128	High	7.54
R1021C	677	688	TFITGEKTTEIF	11.3	2	10	11.45	11.51	1.077	10.766	0.8742	Medium	11.45	11.51	1.029	10.288	0.8621	Medium	11.45	11.51	1.011	10.115	0.8507	Medium	11.44	11.51	1.795	17.951	0.8129	Medium	11.45	11.51	1.732	17.32	0.8339	Medium	11.45	11.52	1.85	18.497	0.8155	Medium	11.45	11.51	2.444	24.445	0.7896	Medium	11.45
R1021C	678	686	FITGEKTTE	6.17	1	7	6.46	6.53	1.157	16.524	0.8224	Medium	6.45	6.53	1.222	17.46	0.8155	Medium	6.45	6.53	1.224	17.479	0.8243	Medium	6.45	6.53	2.169	30.988	0.8166	Medium	6.45	6.53	2.252	32.176	0.8356	Medium	6.46	6.53	2.234	31.913	0.8105	Medium	6.45	6.53	2.595	37.079	0.7948	Medium	6.46
R1021C	687	702	IFIHSLELGHSAATRA	9.01	3	14	9.11	9.17	2.289	16.35	0.7415	Medium	9.11	9.17	2.206	15.759	0.7214	Medium	9.11	9.17	2.23	15.927	0.7528	Medium	9.11	9.18	2.287	16.338	0.7334	Medium	9.1	9.17	2.282	16.3	0.7601	Medium	9.11	9.18	2.298	16.414	0.7487	Medium	9.11	9.17	2.456	17.545	0.5999	Medium	9.11
R1021C	687	726	IFIHSLELGHSAATRAIKASGPGSKRLGIDGDREAVPLTL	9.64	5	36	9.9	9.98	9.575	26.596	0.8854	High	9.9	9.98	9.537	26.493	0.8813	High	9.9	9.98	9.432	26.2	0.883	High	9.91	9.98	10.286	28.572	0.8763	High	9.9	9.98	10.13	28.14	0.874	High	9.91	9.98	10.131	28.141	0.8737	High	9.9	9.98	10.353	28.757	0.8724	High	9.91
R1021C	689	726	IHSLELGHSAATRAIKASGPGSKRLGIDGDREAVPLTL	8.88	5	34	8.97	9.04	10.081	29.649	0.8473	Medium	8.96	9.04	10.065	29.602	0.845	Medium	8.96	9.04	9.93	29.206	0.8473	Medium	8.97	9.04	10.636	31.284	0.8255	Medium	8.96	9.04	10.743	31.597	0.8489	Medium	8.97	9.04	10.711	31.502	0.8439	Medium	8.96	9.04	10.78	31.706	0.8331	Medium	8.97
R1021C	692	726	LELGHSAATRAIKASGPGSKRLGIDGDREAVPLTL	8.89	4	31	9.05	9.13	9.617	31.023	0.8024	Medium	9.05	9.12	9.378	30.253	0.7912	Medium	9.05	9.12	9.45	30.484	0.793	Medium	9.05	9.13	10.399	33.545	0.7647	Medium	9.05	9.12	10.256	33.083	0.7799	Medium	9.05	9.13	10.23	33	0.7677	Medium	9.05	9.12	10.353	33.396	0.7535	Medium	9.05
R1021C	694	726	LGHSAATRAIKASGPGSKRLGIDGDREAVPLTL	8.51	5	29	8.56	8.63	9.155	31.57	0.8245	Medium	8.55	8.63	9.262	31.939	0.8324	Medium	8.55	8.63	9.138	31.51	0.828	Medium	8.56	8.63	9.948	34.303	0.8564	Medium	8.55	8.63	9.861	34.004	0.8198	Medium	8.56	8.63	9.952	34.318	0.8128	Medium	8.55	8.63	10.059	34.685	0.8367	Medium	8.56
R1021C	745	749	EKLCT	5.21	1	3	5.48	5.55	0.364	12.128	0.7733	Medium	5.48	5.55	0.369	12.303	0.8022	Medium	5.48	5.55	0.357	11.905	0.8148	Medium	5.48	5.55	1.274	42.454	0.7919	Medium	5.48	5.55	1.293	43.104	0.7943	Medium	5.48	5.54	1.284	42.785	0.8061	Medium	5.48	5.54	1.329	44.304	0.7955	Medium	5.48
R1021C	750	763	SVNLSKACRQQEEL	8.02	2	12	8.26	8.33	4.486	37.38	0.9335	High	8.26	8.33	4.525	37.707	0.9254	High	8.26	8.33	4.472	37.268	0.9274	High	8.26	8.33	4.924	41.03	0.9083	Medium	8.26	8.33	4.949	41.238	0.9171	High	8.26	8.33	4.936	41.136	0.9142	High	8.26	8.33	4.943	41.188	0.9079	High	8.26
R1021C	750	769	SVNLSKACRQQEELDSSTEA	7.96	3	18	8.2	8.28	7.405	41.138	0.9303	High	8.2	8.27	7.339	40.774	0.8959	High	8.2	8.28	7.325	40.694	0.9154	High	8.2	8.28	7.986	44.366	0.9182	High	8.2	8.28	7.933	44.073	0.9122	High	8.2	8.28	7.948	44.157	0.8984	High	8.2	8.28	8.135	45.193	0.9025	High	8.2
R1021C	754	763	SKACRQQEEL	5.52	2	8	5.78	5.86	3.873	48.413	0.8945	Medium	5.78	5.86	3.769	47.114	0.8974	Medium	5.78	5.86	3.779	47.238	0.9127	Medium	5.78	5.86	3.802	47.524	0.8474	Medium	5.78	5.86	3.853	48.169	0.8946	Medium	5.79	5.86	3.76	47.004	0.8745	Medium	5.78	5.86	3.789	47.361	0.8688	Medium	5.79
R1021C	768	774	EALTLNL	11.99	1	5	12.02	12.08	0.703	14.055	0.7739	Medium	12.02	12.08	0.666	13.321	0.792	Medium	12.02	12.09	0.708	14.159	0.8083	Medium	12.01	12.08	1.281	25.619	0.7262	Medium	12.02	12.09	1.294	25.872	0.7492	Medium	12.02	12.09	1.288	25.755	0.783	Medium	12.02	12.08	1.319	26.38	0.7798	Medium	12.02
R1021C	770	774	LTLNL	11.56	1	3	11.67	11.75	0.508	16.938	0.9119	Medium	11.67	11.75	0.518	17.281	0.9144	Medium	11.67	11.75	0.487	16.246	0.9057	Medium	11.67	11.75	0.727	24.217	0.913	Medium	11.67	11.75	0.71	23.656	0.9164	Medium	11.68	11.75	0.757	25.231	0.9009	Medium	11.67	11.75	0.723	24.114	0.9096	Medium	11.68
R1021C	775	815	TEVVKRQTPKSKKGFNQISTSQIKVDKVQIIGSNSCPFAVC	9.69	5	37	9.74	9.82	5.26	14.217	0.8362	Medium	9.74	9.82	5.289	14.294	0.8569	Medium	9.74	9.82	5.221	14.111	0.8514	Medium	9.75	9.82	6.897	18.641	0.8591	Medium	9.75	9.82	6.666	18.016	0.8424	Medium	9.75	9.82	6.938	18.752	0.8436	Medium	9.74	9.82	7.199	19.457	0.8491	Medium	9.75
R1021C	777	796	VVKRQTPKSKKGFNQISTSQ	4.59	4	17	4.82	4.89	7.678	45.167	0.9168	Medium	4.82	4.88	7.615	44.792	0.911	Medium	4.82	4.88	7.414	43.61	0.9139	Medium	4.82	4.88	7.495	44.091	0.92	Medium	4.82	4.88	7.523	44.251	0.9154	High	4.81	4.88	7.294	42.906	0.9296	Medium	4.81	4.88	7.429	43.699	0.9223	Medium	4.81
R1021C	797	815	IKVDKVQIIGSNSCPFAVC	11.46	3	16	11.5	11.58	0.766	4.785	0.9177	Medium	11.51	11.58	0.724	4.524	0.924	Medium	11.51	11.58	0.779	4.87	0.9195	Medium	11.5	11.58	1.007	6.292	0.9064	Medium	11.5	11.58	0.982	6.138	0.9109	Medium	11.51	11.58	0.98	6.128	0.9074	Medium	11.51	11.58	1.018	6.36	0.9055	Medium	11.51
R1021C	816	830	LDQDERKILQSVIRC	10.93	4	13	11.07	11.13	1.358	10.45	0.9288	High	11.07	11.14	1.303	10.025	0.9314	High	11.07	11.14	1.305	10.04	0.9323	High	11.07	11.13	3.266	25.126	0.902	High	11.07	11.14	3.42	26.304	0.9283	High	11.07	11.14	3.391	26.086	0.9285	High	11.07	11.14	3.94	30.309	0.9199	High	11.07
R1021C	817	830	DQDERKILQSVIRC	10.39	3	12	10.47	10.54	1.352	11.264	0.8613	Medium	10.47	10.54	1.243	10.356	0.8753	Medium	10.47	10.54	1.267	10.557	0.8704	Medium	10.47	10.54	3.104	25.864	0.8327	Medium	10.47	10.54	3.215	26.795	0.8427	Medium	10.48	10.54	2.998	24.98	0.8292	Medium	10.47	10.54	3.637	30.305	0.8252	Medium	10.48
R1021C	821	830	RKILQSVIRC	7.8	3	8	8.03	8.1	0.584	7.302	0.896	Medium	8.02	8.1	0.595	7.432	0.8786	Medium	8.02	8.1	0.58	7.246	0.8939	Medium	8.03	8.1	1.351	16.892	0.8232	Medium	8.02	8.1	1.361	17.018	0.8763	Medium	8.03	8.1	1.388	17.345	0.8562	Medium	8.03	8.1	1.646	20.573	0.8549	Medium	8.03
R1021C	831	861	EVSPCYKPEKSSLCPPPQRPSYPPAPATPDL	8.93	4	19	8.92	8.99	7.875	41.448	0.8514	Medium	8.91	8.99	7.908	41.623	0.8827	Medium	8.91	8.99	7.837	41.245	0.8743	Medium	8.92	8.99	8.265	43.502	0.8845	High	8.91	8.99	8.042	42.325	0.8738	Medium	8.92	8.99	8.155	42.921	0.8675	Medium	8.91	8.99	8.466	44.557	0.8689	High	8.92
R1021C	865	877	LCLPIMTFSGALP	14.35	2	9	14.58	14.64	1.058	11.757	0.7419	Medium	14.58	14.64	1.087	12.077	0.7675	Medium	14.58	14.64	1.038	11.53	0.7399	Medium	14.58	14.65	1.756	19.508	0.7448	Medium	14.58	14.64	1.62	18	0.7392	Medium	14.57	14.64	1.764	19.6	0.7416	Medium	14.58	14.64	2.216	24.619	0.7491	Medium	14.58
R1021C	868	877	PIMTFSGALP	12.67	2	7	12.89	12.97	0.813	11.616	0.8314	Medium	12.81	12.89	0.771	11.014	0.842	Medium	12.82	12.89	0.768	10.977	0.8414	Medium	12.81	12.89	1.562	22.321	0.8841	Medium	12.81	12.89	1.523	21.753	0.8835	Medium	12.82	12.89	1.544	22.051	0.8852	Medium	12.81	12.89	1.981	28.296	0.8917	High	12.82
R1021C	872	877	FSGALP	9.48	1	3	9.61	9.67	0.605	20.179	0.8382	Medium	9.61	9.68	0.64	21.344	0.8585	Medium	9.61	9.68	0.559	18.617	0.858	Medium	9.61	9.68	1.189	39.638	0.84	Medium	9.61	9.68	1.156	38.535	0.8449	Medium	9.61	9.68	1.208	40.277	0.836	Medium	9.61	9.68	1.451	48.353	0.8445	Medium	9.61
R1021P	11	26	DRIQHALERCLHGLSL	11.9	4	14	12.05	12.14	3.056	21.827	0.9041	High	12.05	12.14	3.031	21.649	0.9067	High	12.05	12.14	3.036	21.686	0.9024	High	12.05	12.13	3.843	27.448	0.8483	Medium	12.07	12.17	4.087	29.191	0.8321	Medium	12.05	12.13	3.862	27.586	0.9045	Medium	12.05	12.13	5.211	37.222	0.8915	Medium	12.06
R1021P	27	36	SRRSTSWSAG	5.64	3	8	5.91	5.98	3.395	42.435	0.7979	Medium	5.92	5.98	3.322	41.519	0.7724	Medium	5.85	5.94	3.444	43.047	0.7505	Medium	5.92	5.98	3.452	43.155	0.822	Medium	5.92	5.99	3.545	44.307	0.8153	Medium	5.91	5.98	3.44	43.003	0.8415	Medium	5.84	5.93	3.616	45.197	0.8222	Medium	5.91
R1021P	42	47	WSLQEL	13.14	1	4	13.23	13.3	0.218	5.447	0.8041	Medium	13.23	13.29	0.247	6.183	0.781	Medium	13.23	13.29	0.232	5.791	0.7735	Medium	13.23	13.3	0.998	24.942	0.8446	Medium	13.26	13.35	0.991	24.778	0.8559	Medium	13.22	13.29	0.987	24.678	0.8518	Medium	13.22	13.29	1.809	45.221	0.8385	Medium	13.25
R1021P	48	55	VSRDPGHF	5.94	2	5	6.15	6.22	0.635	12.705	0.7963	Medium	6.15	6.22	0.571	11.422	0.7827	Medium	6.15	6.22	0.623	12.451	0.7969	Medium	6.15	6.22	1.145	22.892	0.8013	Medium	6.15	6.22	1.177	23.545	0.8156	Medium	6.15	6.22	1.11	22.2	0.8065	Medium	6.15	6.22	1.438	28.759	0.8111	Medium	6.15
R1021P	56	68	LILLEQILQKTRE	13.04	3	11	13.02	13.09	0.108	0.986	0.8124	Medium	13.02	13.08	0.069	0.627	0.7873	Medium	13.02	13.08	0.066	0.602	0.6856	Medium	13.02	13.09	0.244	2.214	0.8799	Medium	13.01	13.08	0.118	1.07	0.8353	Medium	13.01	13.08	0.183	1.663	0.8482	Medium	13.01	13.08	0.5	4.549	0.8615	Medium	13.02
R1021P	59	68	LEQILQKTRE	6.84	3	8	7.06	7.13	0.151	1.893	0.9259	High	7.06	7.13	0.132	1.648	0.926	High	7.06	7.13	0.126	1.569	0.9308	High	7.06	7.13	0.181	2.266	0.9135	High	7.06	7.14	0.199	2.489	0.9078	High	7.06	7.13	0.193	2.41	0.9147	High	7.06	7.13	0.523	6.532	0.9203	High	7.06
R1021P	59	83	LEQILQKTREVQEKGTYDLLAPLAL	12.31	4	22	12.53	12.6	1.246	5.663	0.776	Medium	12.53	12.6	1.395	6.34	0.7917	Medium	12.53	12.6	1.206	5.48	0.7895	Medium	12.53	12.6	3.037	13.805	0.7756	Medium	12.53	12.59	3.292	14.966	0.7828	Medium	12.53	12.59	3.218	14.626	0.7784	Medium	12.53	12.59	4.639	21.084	0.7541	Medium	12.53
R1021P	69	78	VQEKGTYDLL	10.41	1	8	10.58	10.64	1.239	15.488	0.7856	Medium	10.57	10.64	1.175	14.682	0.7539	Medium	10.57	10.64	1.187	14.841	0.7828	Medium	10.57	10.64	2.312	28.902	0.7674	Medium	10.58	10.64	2.416	30.206	0.7662	Medium	10.57	10.64	2.327	29.082	0.7703	Medium	10.57	10.64	3.064	38.301	0.7509	Medium	10.57
R1021P	69	83	VQEKGTYDLLAPLAL	13.35	2	12	13.57	13.64	0.891	7.427	0.8412	Medium	13.57	13.64	0.89	7.42	0.851	Medium	13.57	13.64	1.031	8.59	0.8626	Medium	13.57	13.64	2.008	16.736	0.8333	Medium	13.57	13.64	2.026	16.884	0.8489	Medium	13.57	13.63	2.015	16.795	0.8377	Medium	13.57	13.63	2.695	22.456	0.8224	Medium	13.57
R1021P	69	84	VQEKGTYDLLAPLALL	14.23	2	13	14.32	14.39	0.688	5.291	0.7877	Medium	14.32	14.38	0.755	5.805	0.7917	Medium	14.32	14.38	0.871	6.698	0.8195	Medium	14.32	14.39	1.713	13.177	0.7796	Medium	14.32	14.38	1.794	13.799	0.7901	Medium	14.31	14.38	1.731	13.316	0.7923	Medium	14.31	14.38	2.365	18.194	0.7693	Medium	14.32
R1021P	84	90	LFYSTVL	12.93	1	5	13.09	13.16	0.055	1.105	0.8786	Medium	13.09	13.16	0.048	0.953	0.8741	Medium	13.09	13.16	0.055	1.091	0.8845	Medium	13.1	13.16	0.103	2.063	0.8869	Medium	13.09	13.16	0.072	1.433	0.8898	Medium	13.09	13.16	0.07	1.398	0.8818	Medium	13.09	13.16	0.094	1.876	0.8785	Medium	13.1
R1021P	85	90	FYSTVL	11.25	1	4	11.44	11.51	0.109	2.729	0.7392	Medium	11.44	11.51	0.016	0.408	0.7542	Medium	11.44	11.51	0.112	2.805	0.7497	Medium	11.44	11.5	0.129	3.223	0.6954	Medium	11.44	11.5	0.128	3.195	0.7521	Medium	11.44	11.5	0.122	3.054	0.7357	Medium	11.44	11.5	0.122	3.053	0.714	Medium	11.47
R1021P	91	101	CTPHFPPDSDL	9.64	2	6	9.9	9.97	0.944	15.737	0.8921	Medium	9.9	9.97	0.881	14.676	0.886	Medium	9.89	9.97	0.903	15.047	0.8994	Medium	9.89	9.97	1.656	27.601	0.8741	Medium	9.9	9.97	1.662	27.693	0.8879	Medium	9.89	9.97	1.644	27.405	0.8827	Medium	9.89	9.97	1.938	32.303	0.8776	Medium	9.89
R1021P	91	102	CTPHFPPDSDLL	11.04	2	7	11.12	11.19	0.894	12.766	0.833	Medium	11.12	11.19	0.829	11.839	0.8061	Medium	11.12	11.19	0.836	11.94	0.83	Medium	11.12	11.18	1.912	27.309	0.8716	Medium	11.12	11.18	1.965	28.066	0.8339	Medium	11.12	11.18	1.881	26.875	0.8503	Medium	11.12	11.18	2.394	34.196	0.8709	Medium	11.12
R1021P	91	103	CTPHFPPDSDLLL	12.52	2	8	12.3	12.36	0.784	9.796	0.7351	Medium	12.29	12.36	0.765	9.557	0.7088	Medium	12.29	12.36	0.761	9.519	0.6976	Medium	12.29	12.37	1.902	23.769	0.7681	Medium	12.29	12.36	1.976	24.703	0.731	Medium	12.29	12.36	1.943	24.282	0.739	Medium	12.29	12.36	2.333	29.163	0.7501	Medium	12.3
R1021P	102	122	LLKAARTYHRFLTWPVPYCSI	11.99	4	17	11.88	11.99	1.182	6.953	0.7007	Medium	11.88	11.98	1.25	7.355	0.6643	Medium	11.88	11.98	1.437	8.453	0.6804	Medium	11.87	11.98	2.279	13.408	0.734	Medium	11.87	11.98	2.446	14.387	0.6724	Medium	11.87	11.98	2.247	13.218	0.736	Medium	11.87	11.98	3.457	20.334	0.6983	Medium	11.88
R1021P	102	123	LLKAARTYHRFLTWPVPYCSIC	12.04	4	18	12.31	12.38	0.833	4.625	0.7244	Medium	12.3	12.38	0.805	4.47	0.7322	Medium	12.3	12.38	0.846	4.702	0.738	Medium	12.31	12.38	1.846	10.256	0.7083	Medium	12.3	12.38	1.954	10.858	0.7028	Medium	12.3	12.38	1.994	11.077	0.7184	Medium	12.3	12.38	2.945	16.36	0.6737	Medium	12.31
R1021P	129	164	FIDAELKAPGISYQRLVRAEQGLSTRSHRSSTVTVL	10.51	5	33	10.53	10.6	2.372	7.189	0.796	Medium	10.53	10.6	2.291	6.943	0.769	Medium	10.53	10.6	2.371	7.186	0.7766	Medium	10.45	10.54	1.783	5.402	0.7438	Medium	10.54	10.6	1.845	5.592	0.7556	Medium	10.53	10.6	1.767	5.355	0.7594	Medium	10.45	10.54	2.2	6.666	0.7161	Medium	10.53
R1021P	134	144	LKAPGISYQRL	8.83	3	8	8.95	9.02	0.325	4.057	0.7379	Medium	8.96	9.02	0.3	3.756	0.7389	Medium	8.96	9.02	0.239	2.985	0.7679	Medium	8.95	9.02	0.273	3.412	0.7299	Medium	8.96	9.03	0.204	2.551	0.7523	Medium	8.95	9.02	0.304	3.795	0.7602	Medium	8.95	9.02	0.333	4.162	0.7266	Medium	8.95
R1021P	145	162	VRAEQGLSTRSHRSSTVT	4.34	4	16	4.61	4.68	1.921	12.005	0.8691	Medium	4.61	4.67	1.756	10.975	0.8703	Medium	4.61	4.67	1.909	11.932	0.8622	Medium	4.6	4.67	1.98	12.377	0.8541	Medium	4.61	4.67	2.072	12.95	0.8824	Medium	4.6	4.67	1.943	12.143	0.8814	Medium	4.61	4.67	2.208	13.799	0.8651	Medium	4.6
R1021P	145	164	VRAEQGLSTRSHRSSTVTVL	6.57	4	18	6.78	6.85	1.386	7.698	0.9298	High	6.78	6.85	1.273	7.071	0.9365	High	6.78	6.85	1.4	7.778	0.9383	High	6.78	6.85	1.645	9.136	0.9225	High	6.78	6.85	1.483	8.237	0.8944	Medium	6.78	6.85	1.46	8.111	0.9081	High	6.78	6.85	1.844	10.242	0.9001	High	6.78
R1021P	165	172	LLNPVEVQ	9.53	1	5	9.46	9.5	1.24	24.803	0.8003	Medium	9.46	9.5	1.112	22.247	0.7983	Medium	9.46	9.5	1.132	22.649	0.8022	Medium	9.46	9.5	2.703	54.057	0.787	Medium	9.46	9.5	2.756	55.118	0.7923	Medium	9.46	9.5	2.702	54.038	0.7873	Medium	9.46	9.5	2.962	59.244	0.7855	Medium	9.46
R1021P	171	175	VQAEF	8.93	1	3	9.19	9.26	1.21	40.319	0.7619	Medium	9.19	9.26	1.163	38.759	0.7629	Medium	9.19	9.26	1.189	39.648	0.7675	Medium	9.19	9.25	1.463	48.764	0.7498	Medium	9.19	9.26	1.509	50.306	0.776	Medium	9.19	9.26	1.473	49.114	0.7575	Medium	9.19	9.25	1.707	56.883	0.7421	Medium	9.19
R1021P	176	193	LDVADKLSTPGPSPHSAY	8.3	2	13	8.55	8.63	2.392	18.399	0.8833	High	8.55	8.63	2.31	17.769	0.8839	Medium	8.55	8.63	2.376	18.278	0.8841	Medium	8.55	8.63	3.201	24.626	0.8967	High	8.56	8.63	3.339	25.684	0.9097	High	8.55	8.63	3.282	25.25	0.9103	High	8.55	8.63	4.405	33.884	0.9145	High	8.55
R1021P	177	193	DVADKLSTPGPSPHSAY	7.86	3	12	7.79	7.85	2.708	22.569	0.8347	Medium	7.79	7.86	2.617	21.805	0.8156	Medium	7.79	7.86	2.555	21.289	0.8298	Medium	7.79	7.85	3.442	28.683	0.8529	Medium	7.79	7.86	3.471	28.927	0.859	Medium	7.79	7.85	3.327	27.729	0.8489	Medium	7.79	7.85	4.532	37.77	0.8631	Medium	7.79
R1021P	197	209	LLHAFQATFGAHC	10.42	3	11	10.52	10.58	0.722	6.563	0.7757	Medium	10.52	10.58	0.756	6.875	0.7327	Medium	10.52	10.58	0.719	6.532	0.7615	Medium	10.51	10.58	0.863	7.845	0.8251	Medium	10.52	10.59	0.819	7.446	0.7941	Medium	10.51	10.58	0.777	7.065	0.8182	Medium	10.51	10.58	1.099	9.989	0.8131	Medium	10.51
R1021P	197	211	LLHAFQATFGAHCDL	11.57	3	13	11.74	11.81	0.718	5.524	0.7879	Medium	11.74	11.81	0.702	5.398	0.8304	Medium	11.74	11.81	0.743	5.717	0.849	Medium	11.74	11.8	1.121	8.62	0.8316	Medium	11.74	11.81	1.1	8.459	0.8723	Medium	11.74	11.8	1.073	8.253	0.8722	Medium	11.74	11.81	1.213	9.33	0.8203	Medium	11.75
R1021P	215	226	HRRLQSKTLAEL	6.57	4	10	6.8	6.87	1.234	12.337	0.9116	Medium	6.81	6.87	1.177	11.775	0.909	Medium	6.81	6.87	1.214	12.135	0.9068	Medium	6.8	6.87	1.749	17.493	0.9099	Medium	6.81	6.88	1.841	18.407	0.8851	Medium	6.8	6.87	1.721	17.208	0.8874	Medium	6.8	6.87	2.269	22.688	0.9138	Medium	6.8
R1021P	215	228	HRRLQSKTLAELEA	7.02	2	12	7.12	7.2	1.336	11.13	0.6584	Medium	7.13	7.2	1.101	9.172	0.6531	Medium	7.13	7.2	1.262	10.518	0.683	Medium	7.18	7.27	1.663	13.858	0.6823	Medium	7.13	7.2	1.82	15.168	0.688	Medium	7.12	7.2	1.807	15.055	0.5518	Medium	7.12	7.2	2.121	17.674	0.5229	Medium	7.12
R1021P	231	238	TETAEAQE	4.24	1	6	4.51	4.57	0.102	1.699	0.8216	Medium	4.51	4.57	0.072	1.197	0.8182	Medium	4.51	4.57	0.019	0.312	0.8273	Medium	4.5	4.57	0.134	2.241	0.7928	Medium	4.51	4.57	0.145	2.416	0.8244	Medium	4.5	4.57	0.176	2.94	0.8145	Medium	4.5	4.57	0.102	1.703	0.7902	Medium	4.5
R1021P	239	248	LASGIGDAAE	7.32	1	8	7.49	7.55	1.858	23.226	0.6837	Medium	7.49	7.55	1.832	22.896	0.6714	Medium	7.49	7.55	1.74	21.748	0.6769	Medium	7.48	7.55	2.605	32.569	0.6937	Medium	7.49	7.56	2.662	33.275	0.6898	Medium	7.48	7.55	2.537	31.713	0.7175	Medium	7.48	7.55	3.504	43.797	0.6677	Medium	7.48
R1021P	239	257	LASGIGDAAEARQWLRTKL	11.14	3	17	11.14	11.21	1.499	8.816	0.7052	Medium	11.14	11.21	1.452	8.543	0.7039	Medium	11.14	11.21	1.56	9.175	0.6881	Medium	11.13	11.21	2.607	15.335	0.6917	Medium	11.13	11.21	2.64	15.528	0.7079	Medium	11.13	11.21	2.527	14.862	0.7105	Medium	11.13	11.21	3.922	23.073	0.6677	Medium	11.13
R1021P	252	257	WLRTKL	8.4	2	4	8.59	8.66	0.054	1.351	0.8631	Medium	8.59	8.66	0.04	0.991	0.8732	Medium	8.59	8.66	0.077	1.918	0.8815	Medium	8.59	8.66	0.077	1.92	0.8788	Medium	8.6	8.66	0.085	2.12	0.8906	Medium	8.59	8.66	0.078	1.942	0.8848	Medium	8.59	8.66	0.165	4.135	0.8697	Medium	8.59
R1021P	271	288	DTAKPGKLRTIPIPVARC	7.95	2	13	8.26	8.33	3.593	27.637	0.7234	Medium	8.3	8.4	3.423	26.333	0.6998	Medium	8.26	8.33	3.661	28.164	0.6978	Medium	8.19	8.28	5.417	41.667	0.7399	Medium	8.26	8.34	5.385	41.422	0.7411	Medium	8.26	8.33	5.363	41.253	0.7344	Medium	8.26	8.33	5.865	45.117	0.7171	Medium	8.26
R1021P	289	298	YTYSWNQDSF	12.31	1	8	12.35	12.41	2.877	35.958	0.8227	Medium	12.34	12.41	2.772	34.652	0.7796	Medium	12.34	12.41	2.839	35.486	0.7424	Medium	12.35	12.42	3.143	39.289	0.8776	Medium	12.34	12.41	3.1	38.749	0.8405	Medium	12.34	12.41	3.058	38.227	0.8998	Medium	12.34	12.41	3.46	43.246	0.8594	Medium	12.35
R1021P	299	306	DILQEILL	14.55	2	6	14.62	14.71	0.279	4.647	0.6809	Medium	14.63	14.7	0.29	4.83	0.6374	Medium	14.63	14.7	0.391	6.516	0.5997	Medium	14.63	14.71	1.217	20.282	0.7111	Medium	14.63	14.7	1.211	20.179	0.6526	Medium	14.62	14.7	1.162	19.369	0.652	Medium	14.62	14.7	2.284	38.063	0.7151	Medium	14.65
R1021P	304	317	ILLKEQELLQPEIL	12.36	2	11	12.52	12.6	4.233	38.48	0.8486	Medium	12.52	12.6	4.143	37.662	0.8529	Medium	12.52	12.6	4.249	38.623	0.877	Medium	12.53	12.6	5.429	49.355	0.8356	Medium	12.52	12.59	5.614	51.038	0.8462	Medium	12.52	12.59	5.466	49.687	0.8415	Medium	12.52	12.59	5.677	51.608	0.8153	Medium	12.53
R1021P	306	317	LKEQELLQPEIL	11.51	2	9	11.79	11.86	4.028	44.757	0.9142	High	11.79	11.86	3.915	43.503	0.9155	High	11.79	11.86	3.972	44.13	0.9167	High	11.79	11.85	4.82	53.552	0.8906	Medium	11.79	11.86	4.927	54.74	0.9043	High	11.79	11.86	4.843	53.808	0.8967	Medium	11.79	11.86	4.886	54.294	0.8933	Medium	11.8
R1021P	311	317	LLQPEIL	11.83	1	4	11.98	12.04	2.272	56.799	0.8517	Medium	11.98	12.04	2.177	54.414	0.8454	Medium	11.98	12.04	2.218	55.449	0.8534	Medium	11.97	12.04	2.346	58.654	0.84	Medium	12.02	12.12	2.343	58.564	0.7965	Medium	11.97	12.04	2.327	58.177	0.8329	Medium	11.97	12.04	2.366	59.149	0.8218	Medium	11.98
R1021P	333	345	DADGHCAERDSVL	7.48	2	11	7.8	7.86	3.337	30.337	0.849	Medium	7.8	7.86	3.257	29.61	0.8475	Medium	7.8	7.86	3.249	29.54	0.8593	Medium	7.79	7.86	3.301	30.008	0.799	Medium	7.8	7.87	3.26	29.639	0.8301	Medium	7.79	7.86	3.192	29.015	0.8007	Medium	7.8	7.86	3.417	31.064	0.7974	Medium	7.79
R1021P	346	359	STGSAASHASTLSL	8.77	2	12	8.95	9.02	4.982	41.518	0.803	Medium	8.95	9.02	4.908	40.898	0.8114	Medium	8.95	9.02	5.014	41.78	0.8066	Medium	8.94	9.02	4.937	41.145	0.8078	Medium	8.95	9.03	4.999	41.656	0.8017	Medium	8.94	9.02	4.881	40.671	0.8101	Medium	8.94	9.02	4.971	41.426	0.8026	Medium	8.94
R1021P	346	377	STGSAASHASTLSLASSQASGPTLSRQLLTSF	11.94	3	29	11.9	11.98	11.882	40.972	0.7665	Medium	11.9	11.98	11.771	40.591	0.6954	Medium	11.9	11.98	11.809	40.721	0.6226	Medium	11.9	11.97	11.662	40.214	0.8262	Medium	11.9	11.97	11.583	39.942	0.741	Medium	11.9	11.97	11.552	39.833	0.7782	Medium	11.9	11.97	11.751	40.522	0.8137	Medium	11.9
R1021P	360	369	ASSQASGPTL	7.65	1	7	7.94	8.01	3.802	54.32	0.8357	Medium	7.94	8.01	3.674	52.479	0.8325	Medium	7.94	8.01	3.62	51.712	0.8381	Medium	7.94	8	3.732	53.321	0.8446	Medium	7.94	8.01	3.77	53.853	0.838	Medium	7.94	8	3.652	52.167	0.8383	Medium	7.94	8	3.882	55.454	0.8367	Medium	7.94
R1021P	360	377	ASSQASGPTLSRQLLTSF	11.99	2	15	12.12	12.2	7.044	46.958	0.8666	Medium	12.12	12.19	6.919	46.125	0.8698	Medium	12.12	12.19	7.09	47.264	0.8489	Medium	12.11	12.19	6.994	46.624	0.877	Medium	12.12	12.19	7.017	46.783	0.8751	Medium	12.12	12.19	6.931	46.206	0.9106	High	12.12	12.19	7.004	46.695	0.8696	Medium	12.12
R1021P	426	432	FKSTSQM	5.83	1	5	6.11	6.17	2.391	47.829	0.8981	Medium	6.11	6.18	2.31	46.19	0.8917	Medium	6.11	6.18	2.31	46.196	0.8962	Medium	6.11	6.18	2.443	48.85	0.9043	Medium	6.11	6.18	2.517	50.348	0.9152	Medium	6.11	6.18	2.476	49.527	0.8857	Medium	6.11	6.18	2.499	49.975	0.9009	Medium	6.11
R1021P	433	457	VLRRDSRSLEGSPDSGPPLRRAGSL	6.9	4	20	7.16	7.23	7.763	38.814	0.8077	Medium	7.16	7.24	7.486	37.428	0.7951	Medium	7.16	7.23	7.268	36.34	0.8058	Medium	7.16	7.23	7.654	38.27	0.8284	Medium	7.16	7.24	7.644	38.221	0.7954	Medium	7.16	7.23	7.388	36.938	0.8156	Medium	7.16	7.23	7.763	38.816	0.8096	Medium	7.16
R1021P	435	457	RRDSRSLEGSPDSGPPLRRAGSL	6.65	5	18	6.83	6.91	7.483	41.571	0.7143	Medium	6.83	6.91	7.197	39.981	0.705	Medium	6.83	6.91	7.255	40.305	0.7284	Medium	6.83	6.91	7.291	40.507	0.7781	Medium	6.88	6.97	7.37	40.944	0.7303	Medium	6.83	6.91	7.13	39.61	0.7356	Medium	6.83	6.91	7.485	41.583	0.7456	Medium	6.83
R1021P	516	523	RVVVFGSD	8.56	2	6	8.82	8.9	0.849	14.149	0.9197	Medium	8.82	8.9	0.817	13.623	0.905	Medium	8.82	8.9	0.827	13.79	0.92	Medium	8.82	8.89	0.92	15.327	0.8801	Medium	8.82	8.9	0.951	15.857	0.9067	Medium	8.82	8.89	0.894	14.895	0.8962	Medium	8.82	8.89	0.969	16.155	0.8626	Medium	8.82
R1021P	537	546	RRLENNRPLL	6.89	2	7	7.28	7.34	1.627	23.24	0.919	Medium	7.28	7.34	1.543	22.05	0.9238	Medium	7.28	7.34	1.593	22.762	0.9211	Medium	7.27	7.34	2.786	39.795	0.9141	Medium	7.28	7.35	2.852	40.745	0.9117	High	7.27	7.34	2.775	39.646	0.9038	Medium	7.28	7.34	3.031	43.306	0.9092	Medium	7.27
R1021P	537	549	RRLENNRPLLTRF	8.55	4	10	8.48	8.55	1.934	19.336	0.9086	Medium	8.48	8.55	1.822	18.217	0.9032	Medium	8.48	8.55	1.953	19.531	0.893	Medium	8.47	8.55	3.799	37.991	0.9121	Medium	8.48	8.56	3.964	39.642	0.9031	Medium	8.47	8.55	3.755	37.548	0.9051	Medium	8.47	8.55	4.302	43.015	0.9006	Medium	8.47
R1021P	550	554	FKLQF	11.52	1	3	11.8	11.87	0.196	6.534	0.866	Medium	11.8	11.87	0.174	5.807	0.8668	Medium	11.8	11.87	0.189	6.304	0.8621	Medium	11.8	11.86	0.707	23.576	0.8405	Medium	11.8	11.86	0.727	24.238	0.8673	Medium	11.8	11.86	0.694	23.143	0.8572	Medium	11.8	11.86	0.859	28.639	0.8531	Medium	11.8
R1021P	594	604	GAAPWEESTND	9.15	1	8	9.32	9.38	3.549	44.36	0.9038	Medium	9.32	9.38	3.441	43.007	0.8995	Medium	9.32	9.38	3.488	43.594	0.8938	Medium	9.31	9.38	3.56	44.503	0.9049	Medium	9.32	9.39	3.492	43.646	0.9018	Medium	9.31	9.38	3.463	43.291	0.902	Medium	9.31	9.38	3.609	45.115	0.9007	Medium	9.31
R1021P	594	611	GAAPWEESTNDISHYLGM	13.4	2	15	13.51	13.58	4.663	31.084	0.8182	Medium	13.51	13.58	4.533	30.219	0.8192	Medium	13.51	13.58	4.54	30.267	0.8158	Medium	13.52	13.58	4.959	33.061	0.8054	Medium	13.51	13.58	5.112	34.081	0.8076	Medium	13.51	13.57	4.945	32.965	0.8068	Medium	13.51	13.58	5.672	37.816	0.7883	Medium	13.51
R1021P	594	623	GAAPWEESTNDISHYLGMLDPWYERNVLGL	14.18	3	26	14.43	14.5	4.253	16.357	0.7498	Medium	14.42	14.49	3.973	15.279	0.7501	Medium	14.43	14.49	3.542	13.624	0.713	Medium	14.43	14.5	5.755	22.134	0.7423	Medium	14.42	14.49	5.545	21.328	0.7348	Medium	14.42	14.49	5.276	20.292	0.7279	Medium	14.42	14.49	7.276	27.983	0.7725	Medium	14.43
R1021P	605	621	ISHYLGMLDPWYERNVL	13.13	3	14	13.2	13.27	1.714	12.242	0.9077	High	13.2	13.27	1.563	11.161	0.9128	High	13.2	13.27	1.561	11.147	0.918	High	13.2	13.27	2.093	14.949	0.8828	Medium	13.2	13.27	1.95	13.927	0.9151	High	13.2	13.26	2.124	15.171	0.8918	High	13.2	13.26	2.634	18.814	0.9121	High	13.2
R1021P	605	623	ISHYLGMLDPWYERNVLGL	13.71	3	16	13.93	14	1.803	11.266	0.8833	Medium	13.86	13.96	1.708	10.678	0.9036	Medium	13.93	14	1.829	11.432	0.9053	Medium	13.93	14	2.183	13.646	0.8471	Medium	13.93	14	2.306	14.414	0.8918	Medium	13.93	13.99	2.258	14.11	0.8946	Medium	13.93	13.99	3.201	20.003	0.8468	Medium	13.93
R1021P	612	623	LDPWYERNVLGL	13.4	2	9	13.41	13.5	1.133	12.591	0.9043	Medium	13.4	13.49	1.13	12.56	0.7884	Medium	13.4	13.5	1.14	12.672	0.8311	Medium	13.37	13.45	1.482	16.468	0.8783	Medium	13.43	13.53	1.504	16.709	0.8939	Medium	13.37	13.44	1.566	17.4	0.871	Medium	13.37	13.44	2.182	24.249	0.8653	Medium	13.37
R1021P	622	631	GLMHLPPEVL	11.62	2	6	11.83	11.91	1.283	21.391	0.9259	High	11.83	11.91	1.24	20.672	0.9288	High	11.83	11.91	1.268	21.141	0.9261	High	11.83	11.91	2.078	34.636	0.922	High	11.83	11.91	2.153	35.891	0.9313	High	11.83	11.91	2.068	34.473	0.93	High	11.83	11.91	2.484	41.403	0.9319	High	11.84
R1021P	624	631	MHLPPEVL	10.56	1	4	10.68	10.74	1.237	30.927	0.8522	Medium	10.68	10.74	1.203	30.064	0.847	Medium	10.68	10.74	1.212	30.296	0.8468	Medium	10.67	10.74	1.966	49.142	0.8414	Medium	10.67	10.74	2.022	50.541	0.847	Medium	10.67	10.74	1.98	49.499	0.8393	Medium	10.67	10.74	2.291	57.274	0.8431	Medium	10.67
R1021P	632	649	CQSLKAEPRPLEGSPAQL	8.6	2	13	8.6	8.68	6.848	52.679	0.9065	High	8.6	8.68	6.629	50.991	0.8949	High	8.6	8.68	6.636	51.047	0.8791	High	8.6	8.68	6.979	53.681	0.9237	High	8.61	8.68	7.008	53.908	0.9046	High	8.6	8.68	6.913	53.181	0.9088	High	8.6	8.68	7.077	54.441	0.9132	High	8.6
R1021P	632	652	CQSLKAEPRPLEGSPAQLPIL	10.88	3	15	11.12	11.2	6.429	42.863	0.9141	Medium	11.12	11.2	6.33	42.201	0.9067	Medium	11.12	11.2	6.309	42.06	0.9033	Medium	11.12	11.19	6.875	45.835	0.9037	Medium	11.12	11.19	7.003	46.683	0.9057	Medium	11.12	11.19	6.733	44.888	0.9026	Medium	11.12	11.19	7.225	48.166	0.8976	Medium	11.12
R1021P	636	652	KAEPRPLEGSPAQLPIL	10.72	2	11	11.15	11.23	1.213	11.024	0.8909	Medium	11.15	11.23	1.185	10.771	0.8752	Medium	11.15	11.23	1.217	11.061	0.8819	Medium	11.15	11.23	3.237	29.432	0.8667	Medium	11.15	11.23	3.351	30.46	0.878	Medium	11.15	11.23	3.165	28.769	0.8756	Medium	11.15	11.23	3.811	34.642	0.8565	Medium	11.15
R1021P	657	662	LYYCRF	11.24	2	4	11.36	11.44	0.101	2.517	0.9286	High	11.36	11.44	0.093	2.323	0.9334	High	11.36	11.44	0.129	3.237	0.9287	High	11.36	11.44	0.167	4.172	0.8888	High	11.36	11.44	0.184	4.605	0.9066	High	11.36	11.44	0.181	4.53	0.8996	High	11.2	11.29	0.474	11.847	0.8869	High	11.36
R1021P	663	668	AARPVL	7.05	1	3	7.36	7.45	0.406	13.544	0.9249	Medium	7.35	7.43	0.352	11.717	0.9087	Medium	7.35	7.43	0.358	11.941	0.9148	Medium	7.35	7.43	0.757	25.221	0.9163	Medium	7.35	7.43	0.782	26.056	0.8993	Medium	7.35	7.43	0.787	26.222	0.9005	Medium	7.35	7.43	0.979	32.619	0.9002	Medium	7.35
R1021P	663	669	AARPVLL	9.32	1	4	9.32	9.39	0.381	9.537	0.7964	Medium	9.32	9.39	0.375	9.376	0.7904	Medium	9.32	9.39	0.405	10.115	0.7978	Medium	9.31	9.39	0.885	22.128	0.7537	Medium	9.32	9.4	1.035	25.863	0.7488	Medium	9.31	9.39	0.871	21.774	0.7417	Medium	9.31	9.39	1.339	33.47	0.7206	Medium	9.31
R1021P	669	676	LQVYQTEL	10.55	1	6	10.78	10.84	0.073	1.223	0.8846	Medium	10.78	10.84	0.054	0.899	0.8779	Medium	10.78	10.84	0.112	1.87	0.8792	Medium	10.77	10.84	0.229	3.812	0.8842	Medium	10.77	10.84	0.327	5.444	0.8819	Medium	10.77	10.84	0.223	3.713	0.8757	Medium	10.77	10.84	0.489	8.143	0.8913	Medium	10.77
R1021P	669	677	LQVYQTELT	9.68	1	7	9.92	9.99	0.063	0.896	0.8345	Medium	9.92	9.99	0.104	1.483	0.8337	Medium	9.92	9.99	0.112	1.601	0.8183	Medium	9.92	9.98	0.222	3.167	0.8258	Medium	9.92	9.99	0.262	3.737	0.8441	Medium	9.92	9.98	0.173	2.469	0.8303	Medium	9.92	9.98	0.326	4.66	0.8337	Medium	9.92
R1021P	670	677	QVYQTELT	8.26	1	6	8.49	8.56	0.061	1.017	0.645	Medium	8.49	8.56	0.187	3.116	0.6723	Medium	8.49	8.56	0.158	2.632	0.6112	Medium	8.49	8.56	0.277	4.609	0.6989	Medium	8.5	8.56	0.211	3.51	0.6746	Medium	8.49	8.56	0.201	3.351	0.6591	Medium	8.49	8.56	0.296	4.934	0.7	Medium	8.49
R1021P	672	677	YQTELT	7.44	1	4	7.75	7.82	0.112	2.807	0.6533	Medium	7.76	7.82	0.117	2.934	0.635	Medium	7.75	7.82	0.121	3.026	0.6376	Medium	7.75	7.82	0.108	2.688	0.6225	Medium	7.76	7.82	0.052	1.302	0.6534	Medium	7.75	7.82	0.086	2.148	0.6667	Medium	7.75	7.82	0.07	1.744	0.6273	Medium	7.75
R1021P	677	686	TFITGEKTTE	7.37	1	8	7.54	7.6	1.298	16.23	0.9084	Medium	7.54	7.6	1.255	15.692	0.8974	High	7.54	7.6	1.204	15.046	0.9023	High	7.53	7.6	2.4	29.994	0.9111	High	7.54	7.61	2.516	31.449	0.911	High	7.53	7.6	2.38	29.753	0.8999	High	7.54	7.6	3.205	40.059	0.9014	High	7.53
R1021P	677	688	TFITGEKTTEIF	11.3	2	10	11.45	11.52	0.975	9.746	0.8198	Medium	11.45	11.51	0.995	9.947	0.8321	Medium	11.45	11.51	0.996	9.96	0.8269	Medium	11.44	11.51	1.808	18.08	0.779	Medium	11.44	11.51	1.821	18.212	0.8204	Medium	11.44	11.51	1.793	17.932	0.8	Medium	11.45	11.51	2.465	24.646	0.7778	Medium	11.44
R1021P	678	686	FITGEKTTE	6.17	1	7	6.45	6.53	1.239	17.706	0.8058	Medium	6.45	6.53	1.196	17.089	0.8131	Medium	6.45	6.53	1.168	16.683	0.8046	Medium	6.45	6.53	2.235	31.932	0.7851	Medium	6.46	6.53	2.29	32.718	0.8297	Medium	6.45	6.53	2.197	31.386	0.8071	Medium	6.45	6.53	2.761	39.436	0.7841	Medium	6.45
R1021P	687	702	IFIHSLELGHSAATRA	9.01	3	14	9.11	9.17	2.434	17.383	0.6568	Medium	9.11	9.17	2.256	16.114	0.6653	Medium	9.11	9.17	2.386	17.044	0.6672	Medium	9.1	9.17	2.369	16.921	0.6619	Medium	9.11	9.18	2.317	16.551	0.6869	Medium	9.1	9.17	2.309	16.49	0.6621	Medium	9.1	9.17	2.452	17.515	0.6463	Medium	9.1
R1021P	687	726	IFIHSLELGHSAATRAIKASGPGSKRLGIDGDREAVPLTL	9.64	5	36	9.9	9.98	9.497	26.379	0.8771	High	9.9	9.98	9.192	25.533	0.8764	High	9.9	9.98	9.437	26.213	0.877	High	9.9	9.98	10.124	28.123	0.8621	Medium	9.91	9.98	10.21	28.361	0.8634	Medium	9.9	9.98	10.117	28.102	0.8683	Medium	9.9	9.98	10.429	28.969	0.8576	Medium	9.9
R1021P	689	726	IHSLELGHSAATRAIKASGPGSKRLGIDGDREAVPLTL	8.88	5	34	8.96	9.04	10.235	30.103	0.8341	Medium	8.96	9.04	9.696	28.517	0.8278	Medium	8.96	9.04	9.801	28.826	0.8162	Medium	8.96	9.04	10.684	31.423	0.8343	Medium	8.97	9.04	10.733	31.567	0.8474	Medium	8.96	9.04	10.539	30.998	0.8329	Medium	8.96	9.04	10.995	32.338	0.8343	Medium	8.96
R1021P	692	726	LELGHSAATRAIKASGPGSKRLGIDGDREAVPLTL	8.89	4	31	9.05	9.12	9.634	31.077	0.7166	Medium	9.05	9.12	9.113	29.396	0.7015	Medium	9.05	9.12	9.546	30.792	0.7113	Medium	9.05	9.12	10.313	33.267	0.68	Medium	9.05	9.13	10.008	32.283	0.6604	Medium	9.05	9.12	10.095	32.565	0.686	Medium	9.04	9.12	10.525	33.952	0.6878	Medium	9.04
R1021P	694	726	LGHSAATRAIKASGPGSKRLGIDGDREAVPLTL	8.51	5	29	8.55	8.63	9.251	31.901	0.7814	Medium	8.55	8.63	8.952	30.87	0.7405	Medium	8.55	8.63	9.067	31.266	0.7728	Medium	8.55	8.63	9.866	34.021	0.7953	Medium	8.56	8.63	9.629	33.205	0.8049	Medium	8.55	8.63	9.697	33.439	0.7956	Medium	8.55	8.63	10.136	34.952	0.7952	Medium	8.55
R1021P	745	749	EKLCT	5.21	1	3	5.48	5.54	0.405	13.505	0.8039	Medium	5.48	5.55	0.363	12.113	0.7912	Medium	5.48	5.55	0.366	12.198	0.8069	Medium	5.48	5.55	1.249	41.639	0.7951	Medium	5.59	5.68	1.294	43.137	0.7273	Medium	5.48	5.55	1.242	41.416	0.802	Medium	5.48	5.55	1.356	45.2	0.79	Medium	5.48
R1021P	750	763	SVNLSKACRQQEEL	8.02	2	12	8.26	8.32	4.548	37.898	0.8903	Medium	8.26	8.33	4.401	36.677	0.9139	High	8.26	8.33	4.461	37.175	0.9192	High	8.26	8.32	4.896	40.798	0.9084	Medium	8.26	8.33	4.985	41.546	0.913	High	8.26	8.32	4.891	40.759	0.907	High	8.26	8.32	5.141	42.84	0.8927	Medium	8.26
R1021P	750	769	SVNLSKACRQQEELDSSTEA	7.96	3	18	8.2	8.27	7.512	41.735	0.906	High	8.2	8.28	7.013	38.96	0.9135	High	8.2	8.28	7.267	40.371	0.9013	High	8.2	8.27	7.943	44.126	0.9011	High	8.2	8.28	7.981	44.34	0.9006	High	8.2	8.27	7.818	43.433	0.9015	High	8.2	8.27	8.189	45.496	0.8931	High	8.2
R1021P	754	763	SKACRQQEEL	5.52	2	8	5.78	5.86	3.782	47.279	0.884	Medium	5.78	5.86	3.693	46.158	0.8928	Medium	5.78	5.86	3.716	46.45	0.8978	Medium	5.78	5.86	3.806	47.577	0.8609	Medium	5.78	5.86	3.936	49.196	0.8957	Medium	5.78	5.86	3.827	47.834	0.8881	Medium	5.78	5.86	3.89	48.625	0.8538	Medium	5.78
R1021P	768	774	EALTLNL	11.99	1	5	12.02	12.09	0.685	13.694	0.7666	Medium	12.02	12.08	0.662	13.232	0.741	Medium	12.02	12.08	0.676	13.514	0.7579	Medium	12.01	12.08	1.263	25.254	0.7671	Medium	12.02	12.08	1.356	27.13	0.7356	Medium	12.01	12.08	1.322	26.432	0.8048	Medium	12.02	12.08	1.357	27.132	0.755	Medium	12.02
R1021P	770	774	LTLNL	11.56	1	3	11.68	11.75	0.493	16.422	0.9164	Medium	11.67	11.75	0.501	16.688	0.9161	Medium	11.67	11.75	0.468	15.585	0.9009	Medium	11.67	11.75	0.73	24.348	0.8972	Medium	11.67	11.75	0.795	26.498	0.9077	Medium	11.67	11.75	0.744	24.798	0.9044	Medium	11.67	11.75	0.765	25.494	0.9021	Medium	11.67
R1021P	775	815	TEVVKRQTPKSKKGFNQISTSQIKVDKVQIIGSNSCPFAVC	9.69	5	37	9.74	9.82	5.309	14.349	0.8425	Medium	9.74	9.82	5.094	13.767	0.8439	Medium	9.74	9.82	5.244	14.173	0.8395	Medium	9.74	9.82	6.843	18.495	0.8445	Medium	9.75	9.82	6.707	18.128	0.8279	Medium	9.74	9.82	6.959	18.809	0.8347	Medium	9.74	9.82	7.413	20.035	0.8365	Medium	9.74
R1021P	777	796	VVKRQTPKSKKGFNQISTSQ	4.59	4	17	4.82	4.89	7.614	44.79	0.9146	Medium	4.82	4.88	7.339	43.173	0.9046	Medium	4.82	4.88	7.436	43.739	0.9088	Medium	4.81	4.88	7.499	44.11	0.9316	Medium	4.82	4.88	7.619	44.816	0.923	High	4.81	4.88	7.263	42.724	0.9182	Medium	4.82	4.88	7.57	44.529	0.9105	Medium	4.81
R1021P	797	815	IKVDKVQIIGSNSCPFAVC	11.46	3	16	11.51	11.58	0.764	4.774	0.9066	Medium	11.51	11.58	0.754	4.713	0.9062	Medium	11.51	11.58	0.792	4.951	0.9136	Medium	11.5	11.58	0.976	6.099	0.8954	Medium	11.5	11.58	0.95	5.94	0.8983	Medium	11.5	11.58	0.956	5.974	0.9009	Medium	11.5	11.58	1.041	6.504	0.8912	Medium	11.51
R1021P	816	830	LDQDERKILQSVIRC	10.93	4	13	11.07	11.14	1.298	9.987	0.9187	High	11.07	11.14	1.238	9.521	0.9071	High	11.07	11.14	1.277	9.823	0.917	High	11.07	11.13	3.292	25.32	0.9266	High	11.07	11.13	3.485	26.807	0.9226	High	11.07	11.13	3.296	25.357	0.9289	High	11.07	11.13	4.033	31.02	0.9183	High	11.07
R1021P	817	830	DQDERKILQSVIRC	10.39	3	12	10.47	10.54	1.327	11.056	0.8444	Medium	10.47	10.54	1.267	10.555	0.8369	Medium	10.47	10.54	1.214	10.116	0.8384	Medium	10.47	10.54	3.009	25.074	0.8093	Medium	10.48	10.55	3.176	26.467	0.8176	Medium	10.47	10.54	3.066	25.552	0.8159	Medium	10.47	10.54	3.555	29.623	0.801	Medium	10.47
R1021P	821	830	RKILQSVIRC	7.8	3	8	8.02	8.1	0.698	8.729	0.7925	Medium	8.02	8.1	0.557	6.957	0.7711	Medium	8.02	8.1	0.659	8.242	0.7902	Medium	8.02	8.1	1.359	16.984	0.7546	Medium	8.03	8.1	1.392	17.398	0.789	Medium	8.02	8.1	1.356	16.944	0.7928	Medium	8.02	8.1	1.756	21.945	0.7578	Medium	8.02
R1021P	831	861	EVSPCYKPEKSSLCPPPQRPSYPPAPATPDL	8.93	4	19	8.91	8.99	7.947	41.826	0.8479	Medium	8.91	8.99	7.647	40.249	0.8582	Medium	8.91	8.99	7.561	39.795	0.8225	Medium	8.91	8.99	8.148	42.886	0.8587	Medium	8.92	8.99	8.123	42.754	0.8464	Medium	8.91	8.99	8.045	42.343	0.8555	Medium	8.91	8.99	8.546	44.98	0.852	Medium	8.91
R1021P	865	877	LCLPIMTFSGALP	14.35	2	9	14.57	14.64	1.328	14.758	0.6891	Medium	14.58	14.64	1.204	13.377	0.6906	Medium	14.58	14.64	1.238	13.754	0.727	Medium	14.58	14.65	1.871	20.787	0.7213	Medium	14.58	14.64	1.963	21.812	0.7399	Medium	14.57	14.64	1.923	21.37	0.7591	Medium	14.57	14.64	2.223	24.699	0.7455	Medium	14.58
R1021P	868	877	PIMTFSGALP	12.67	2	7	12.86	12.94	0.994	14.198	0.9112	High	12.81	12.89	0.942	13.461	0.8776	Medium	12.87	12.96	0.959	13.698	0.9029	High	12.81	12.89	1.482	21.173	0.8851	Medium	12.81	12.89	1.545	22.077	0.89	Medium	12.81	12.89	1.499	21.414	0.8914	Medium	12.81	12.89	1.968	28.109	0.8976	Medium	12.82
R1021P	872	877	FSGALP	9.48	1	3	9.61	9.68	0.684	22.785	0.8643	Medium	9.61	9.68	0.638	21.272	0.8651	Medium	9.61	9.68	0.636	21.185	0.8445	Medium	9.61	9.67	1.152	38.413	0.8354	Medium	9.61	9.68	1.202	40.07	0.8493	Medium	9.61	9.67	1.161	38.714	0.8561	Medium	9.61	9.67	1.448	48.27	0.8404	Medium	9.61
[truncated: 29 more columns]
