# Supplementary material for: Disease-related mutations in PI3Kγ disrupt regulatory C-terminal dynamics and reveal a path to selective inhibitors
Source: eLife. 2021 Mar 4;10:e64691. doi: 10.7554/eLife.64691 (PMC7955810; doi:10.7554/eLife.64691)
Supplement: Figure 4—figure supplement 1—source data 1. [file elife-64691-fig4-figsupp1-data1.xlsx]

## Sheet: Fig 4-Fig supplement 1 inhb HDX
						Average % deuterium incoporation																														% deuterium changes
p110g						APO									+ IPI-549									+ Gedatolisib												APO vs IPI-549									APO vs Gedatolisib
S	E	Max D	RT	Z	Sequence	3s	SD	30s	SD	300s	SD	3000s	SD		3s	SD	30s	SD	300s	SD	3000s	SD		3s	SD	30s	SD	300s	SD	3000s	SD					3s	SD	30s	SD	300s	SD	3000s	SD		3s	SD	30s	SD	300s
4	12	6	9.335	1	ENYKQPVVL	83.5553	0.56342	80.9317	0.865615	84.6957	0.761749	84.214	1.74163		84.6883	0.195832	83.994	0.712115	83.4857	1.07106	84.1727	0.730132		82.757	0.714526	85.39	0.355729	84.4213	0.747346	84.553	0.636081		Average % Deuterium incorporation	100		-1.133	0.367588	-3.06233	0.1535	1.21	-0.309311	0.0413333	1.0115		0.798333	1.27795	-4.45833	1.22134	0.274333
6	12	4	9.09	1	YKQPVVL	92.4613	0.390043	93.5367	0.325945	93.331	0.550564	92.909	0.573065		92.6687	1.29442	92.479	0.690078	93.0467	0.584	93.1947	0.432216		92.4473	0.246881	93.4763	0.4851	93.0013	0.159676	93.2373	0.362633			90		-0.207333	-0.904372	1.05767	-0.364133	0.284333	-0.033436	-0.285667	0.14085		0.014	0.636924	0.0603333	0.811046	0.329667
13	32	17	4.26	5	REDNCRRRRRMKPRSAAASL	44.7747	1.15656	44.783	1.13363	44.6997	0.735386	45.729	0.559732		45.2117	0.399753	45.136	1.29278	44.9917	0.725508	46.0017	0.648861		45.2247	1.18162	47.5057	1.34304	45.2303	1.35824	46.2357	1.35123			80		-0.437	0.756808	-0.353	-0.15915	-0.292	0.00987751	-0.272667	-0.0891287		-0.45	2.33818	-2.72267	2.47667	-0.530667
33	37	3	9.75	1	SSMEL	70.0327	1.06554	76.745	0.914646	79.084	0.54721	79.4573	1.26743		69.351	1.18283	78.1523	1.49474	79.772	1.61834	77.182	1.44788		69.3643	1.23486	78.0287	0.854229	79.609	0.149278	79.9427	1.17958			70		0.681667	-0.117297	-1.40733	-0.580098	-0.688	-1.07113	2.27533	-0.18045		0.668333	2.30039	-1.28367	1.76887	-0.525
36	41	3	11.025	1	ELIPIE	3.10633	0.479736	4.54867	0.853439	10.0293	0.490204	20.572	0.852159		2.82967	1.07936	3.88867	0.290562	10.5667	0.26386	20.8053	0.639438		4.177	0.300162	5.05533	0.441128	10.7103	0.306089	20.5863	0.39935			60		0.276667	-0.599628	0.66	0.562877	-0.537333	0.226344	-0.233333	0.212721		-1.07067	0.779897	-0.506667	1.29457	-0.681
42	58	13	8.64	3	FVLPTSQRKCKSPETAL	32.907	0.265006	41.462	0.37045	48.549	0.664853	52.5007	0.391583		33.7967	0.435474	40.898	0.443902	47.868	0.953928	52.685	0.149823		33.449	0.662466	40.8847	0.302738	48.0127	0.0667857	52.799	0.149823			50		-0.889667	-0.170468	0.564	-0.0734523	0.681	-0.289076	-0.184333	0.24176		-0.542	0.927472	0.577333	0.673188	0.536333
43	59	13	8.295	3	VLPTSQRKCKSPETALL	34.6243	1.25279	43.056	0.725212	51.3253	1.34573	51.6903	0.715067		35.0277	0.695386	43.0767	1.3578	50.0703	0.683049	51.7167	0.666773		34.68	0.578464	43.5107	0.209619	50.563	1.04993	51.921	0.378083			40		-0.403333	0.557401	-0.0206667	-0.632589	1.255	0.662676	-0.0263333	0.0482943		-0.0556667	1.83125	-0.454667	0.934832	0.762333
59	70	10	6.935	2	LHVAGHGNVEQM	7.68533	0.863193	15.2433	0.278692	20.3953	0.139608	32.482	0.737376		8.27633	0.223198	14.5427	0.218505	20.1513	0.737831	32.3817	0.493017		8.82867	0.776706	15.3053	0.559577	20.8017	0.380897	33.554	1.24221			30		-0.591	0.639995	0.700667	0.0601874	0.244	-0.598223	0.100333	0.24436		-1.14333	1.6399	-0.062	0.838269	-0.406333
59	72	12	6.305	2	LHVAGHGNVEQMKA	5.99733	0.679601	11.447	0.51437	15.6713	0.382	30.6377	0.329426		5.584	0.50771	10.583	0.501785	15.585	0.34011	29.3057	0.452816		7.45267	0.773331	11.3943	0.694457	16.8307	0.60864	30.614	0.825835			20		0.413333	0.171891	0.864	0.0125857	0.0863333	0.0418902	1.332	-0.12339		-1.45533	1.45293	0.0526667	1.20883	-1.15933
60	70	9	5.62	1	HVAGHGNVEQM	7.505	0.498681	14.895	0.228186	19.501	0.4788	32.02	1.14306		7.844	1.19306	14.3143	0.702891	19.861	0.138694	32.802	1.51921		8.27133	0.928017	14.8147	0.411575	20.6563	0.366826	34.1077	0.650071			10		-0.339	-0.69438	0.580667	-0.474705	-0.36	0.340106	-0.782	-0.376151		-0.766333	1.4267	0.0803333	0.639762	-1.15533
60	75	14	8.57	3	HVAGHGNVEQMKAQVW	3.06733	0.227377	5.55033	0.273001	8.58933	0.547537	18.7683	0.713631		3.52067	0.801144	5.601	0.00458258	8.07633	0.528854	19.8973	0.979848		3.48333	0.0873232	5.64733	0.507993	8.602	0.896263	19.9847	1.34002					-0.453333	-0.573767	-0.0506667	0.268418	0.513	0.0186828	-1.129	-0.266217		-0.416	0.3147	-0.097	0.780994	-0.0126667
60	78	17	8.845	4	HVAGHGNVEQMKAQVWLRA	3.01467	0.110256	6.26533	0.657689	9.155	0.455119	24.3243	0.846112		3.22933	0.206578	5.11867	0.794267	8.52233	0.849772	24.258	0.322529		3.482	0.314878	4.91	0.536657	8.88633	0.212114	24.123	0.643659					-0.214667	-0.0963219	1.14667	-0.136579	0.632667	-0.394653	0.0663333	0.523583		-0.467333	0.425134	1.35533	1.19435	0.268667
71	76	4	11.01	1	KAQVWL	3.275	0.457885	3.733	0.455589	5.32933	1.60811	7.87467	0.402262		3.94333	0.456669	3.78867	0.455625	5.071	0.962355	8.74333	0.543504		3.72067	0.179238	4.099	0.255149	5.641	0.930398	8.55133	0.745159					-0.668333	0.00121662	-0.0556667	-3.65812e-05	0.258333	0.645753	-0.868667	-0.141242		-0.445667	0.637124	-0.366	0.710738	-0.311667
71	78	6	8.75	2	KAQVWLRA	3.35133	0.602799	3.95	0.753161	10.2063	0.396254	25.5737	0.60009		3.38167	1.07638	3.18967	0.479003	9.07633	0.450308	27.5017	1.03399		3.83933	0.69842	5.17733	0.821489	9.371	0.640148	24.0357	1.08143					-0.0303333	-0.473584	0.760333	0.274158	1.13	-0.0540539	-1.928	-0.433895		-0.488	1.30122	-1.22733	1.57465	0.835333
79	84	4	6.59	1	LETSVA	54.568	0.458392	74.509	1.01516	81.076	0.940116	81.9047	0.746192		54.3383	1.2835	76.0043	1.15693	80.4603	0.887945	80.833	0.905875		53.6887	1.16059	73.5337	0.931937	80.3937	0.258353	80.1467	0.463122					0.229667	-0.825106	-1.49533	-0.141771	0.615667	0.0521715	1.07167	-0.159683		0.879333	1.61898	0.975333	1.94709	0.682333
79	86	6	6.455	1	LETSVAAD	53.6807	1.02458	73.5763	0.498086	80.809	0.593927	81.728	0.179477		54.0717	1.02076	73.1327	0.761	80.5507	0.72999	81.038	0.688374		54.4357	1.50909	73.702	0.689161	80.817	0.470316	80.852	0.567585					-0.391	0.00381992	0.443667	-0.262915	0.258333	-0.136063	0.69	-0.508897		-0.755	2.53367	-0.125667	1.18725	-0.008
87	99	10	10.745	3	FYHRLGPHHFLLL	3.31033	0.0948701	6.87633	0.681696	8.913	0.174597	12.3307	0.0601027		3.45667	0.260634	6.30733	0.436276	9.094	0.117145	11.8433	0.24249		3.621	0.0389744	6.663	0.462124	9.25633	0.186398	12.309	0.0413884					-0.146333	-0.165764	0.569	0.24542	-0.181	0.0574515	0.487333	-0.182387		-0.310667	0.133844	0.213333	1.14382	-0.343333
88	98	8	8.97	4	YHRLGPHHFLL	4.083	0.479951	10.1223	0.646828	13.2023	0.924247	16.9643	1.07175		4.801	0.218714	10.026	0.446937	13.0167	0.546668	16.2367	0.638094		4.852	0.945789	10.0307	0.14548	13.1583	1.25314	17.401	0.97674					-0.718	0.261237	0.0963333	0.199891	0.185667	0.377579	0.727667	0.433655		-0.769	1.42574	0.0916667	0.792308	0.044
100	106	5	6.355	2	YQKKGQW	36.0293	0.523951	55.2807	0.510504	62.3903	0.83459	65.5163	0.440097		37.6257	1.35739	54.8597	0.725348	62.073	1.05136	64.8933	0.72611		36.851	0.785922	55.541	0.623818	62.186	0.537791	64.7687	0.793445					-1.59633	-0.833437	0.421	-0.214844	0.317333	-0.216768	0.623	-0.286013		-0.821667	1.30987	-0.260333	1.13432	0.204333
107	113	5	9.415	1	YEIYDKY	20.658	0.57789	36.885	1.31779	54.796	0.229785	57.9317	0.774789		20.741	0.76661	36.274	1.16218	55.4783	0.975046	57.6763	0.701581		21.2123	0.383448	38.24	0.754263	54.6587	0.427259	57.8477	0.871473					-0.083	-0.18872	0.611	0.155607	-0.682333	-0.745261	0.255333	0.0732073		-0.554333	0.961338	-1.355	2.07205	0.137333
107	118	10	9.705	2	YEIYDKYQVVQT	10.6753	0.302394	19.3557	0.657959	32.612	0.960939	52.94	1.01503		11.4143	0.776168	18.469	0.364317	33.711	1.20472	53.2547	0.581545		11.745	0.154826	19.9437	1.18512	34.556	1.17003	53.8937	0.670423					-0.739	-0.473773	0.886667	0.293642	-1.099	-0.243783	-0.314667	0.433486		-1.06967	0.45722	-0.588	1.84308	-1.944
107	119	11	11.09	2	YEIYDKYQVVQTL	9.227	0.183992	16.7877	0.394017	29.169	1.07579	53.3023	0.0570731		9.542	0.393909	16.4387	0.346233	28.993	0.404303	53.3807	1.07064		10	0.293481	17.4563	0.634235	30.5017	1.08413	54.7383	1.01025					-0.315	-0.209917	0.349	0.0477839	0.176	0.671484	-0.0783333	-1.01356		-0.773	0.477473	-0.668667	1.02825	-1.33267
114	121	6	9.14	1	QVVQTLDC	19.0523	0.55639	24.9993	1.2229	27.3917	0.825328	49.7393	0.775546		19.4643	1.20006	24.0993	0.0422532	27.7513	0.629392	49.6297	0.490445		20.279	0.620952	24.243	0.528075	27.068	0.732558	51.0683	0.703045					-0.412	-0.643665	0.9	1.18065	-0.359667	0.195936	0.109667	0.285101		-1.22667	1.17734	0.756333	1.75097	0.323667
122	137	13	7.94	4	LRYWKATHRSPGQIHL	6.013	0.0696348	13.125	0.974386	23.429	0.434211	30.0957	0.484164		6.693	0.452103	12.4297	0.119375	23.2713	1.44001	30.187	0.0920652		6.79367	0.497358	12.8607	0.365177	23.475	0.463107	30.3687	0.973333					-0.68	-0.382468	0.695333	0.855012	0.157667	-1.0058	-0.0913333	0.392098		-0.780667	0.566993	0.264333	1.33956	-0.046
122	149	23	6.72	5	LRYWKATHRSPGQIHLVQRHPPSEESQA	10.6597	0.246662	17.5683	0.261504	27.203	0.819309	32.389	0.447139		10.6983	0.303638	17.4347	0.575109	26.9707	1.24483	31.271	0.664099		10.8513	0.552263	17.605	0.324066	27.5417	0.667951	32.0637	0.988238					-0.0386667	-0.0569761	0.133667	-0.313605	0.232333	-0.425522	1.118	-0.216961		-0.191667	0.798925	-0.0366667	0.58557	-0.338667
125	149	20	6.09	4	WKATHRSPGQIHLVQRHPPSEESQA	14.7297	0.567127	22.032	0.541898	29.2037	0.426629	32.215	0.855911		14.699	1.08951	21.5543	0.391154	28.6013	0.900657	31.3747	0.945688		15.706	0.990836	22.1473	0.208291	29.045	0.942889	30.872	1.03317					0.0306667	-0.522381	0.477667	0.150744	0.602333	-0.474028	0.840333	-0.0897777		-0.976333	1.55796	-0.115333	0.750189	0.158667
138	149	8	4.315	2	VQRHPPSEESQA	40.404	1.01868	50.1307	1.51038	62.606	0.921977	63.939	0.349089		41.0203	0.752748	50.1223	1.0577	62.3137	0.484025	64.0407	0.607772		41.3147	0.802811	51.798	1.00226	62.145	0.86527	64.146	0.993658					-0.616333	0.265928	0.00833333	0.452681	0.292333	0.437952	-0.101667	-0.258683		-0.910667	1.82149	-1.66733	2.51264	0.461
138	150	9	7.015	2	VQRHPPSEESQAF	33.124	0.556596	46.622	0.680545	59.3017	0.89609	61.8497	0.205583		34.1477	1.25509	46.415	0.520691	60.216	1.04285	60.8067	0.697742		34.3597	0.729116	47.259	0.435997	60.8597	0.645491	60.8917	1.35654					-1.02367	-0.698495	0.207	0.159854	-0.914333	-0.146756	1.043	-0.492159		-1.23567	1.28571	-0.637	1.11654	-1.558
150	157	6	9.52	2	FQRQLTAL	2.50467	0.368516	5.75967	0.528118	18.3003	0.771772	33.144	0.234237		2.94733	0.778383	5.49367	0.324477	18.0973	0.494839	33.5953	0.260231		2.96033	0.00550757	6.01667	0.113183	18.089	0.0872296	33.7603	0.307997					-0.442667	-0.409867	0.266	0.203641	0.203	0.276934	-0.451333	-0.0259942		-0.455667	0.374024	-0.257	0.6413	0.211333
151	157	5	8.405	2	QRQLTAL	3.96133	0.653899	7.73433	0.606018	21.2233	0.621185	34.5767	0.186827		3.919	1.31977	7.284	0.31792	21.1873	0.700136	35.0123	0.363704		4.39133	0.313203	7.74867	0.577184	21.3343	0.355461	35.9073	0.722791					0.0423333	-0.665869	0.450333	0.288098	0.036	-0.0789513	-0.435667	-0.176877		-0.43	0.967103	-0.0143333	1.1832	-0.111
158	164	5	8.57	1	IGYDVTD	14.7167	0.370148	21.7573	1.03874	45.1683	0.693018	60.683	0.158218		15.305	1.36195	20.78	0.65414	45.224	1.69528	60.9027	0.609033		15.4253	0.577342	21.7583	0.829077	45.1843	0.139586	61.172	0.368577					-0.588333	-0.991803	0.977333	0.3846	-0.0556667	-1.00226	-0.219667	-0.450815		-0.708667	0.94749	-0.001	1.86782	-0.016
158	173	14	10.665	2	IGYDVTDVSNVHDDEL	23.5187	0.322568	33.509	0.584633	42.7983	0.200799	47.292	0.14046		24.1247	0.477856	33.0543	0.0971614	42.6747	0.437563	47.9243	0.401774		24.954	0.343055	33.7113	0.267788	42.7007	0.275595	47.7447	0.0960746					-0.606	-0.155288	0.454667	0.487472	0.123667	-0.236764	-0.632333	-0.261314		-1.43533	0.665624	-0.202333	0.852421	0.0976667
158	174	15	10.26	2	IGYDVTDVSNVHDDELE	22.4913	0.339753	31.553	0.689248	41.993	0.149589	47.8213	0.492282		23.3	0.047571	31.3143	0.147164	41.705	0.661402	48.052	0.299321		23.739	0.2774	31.3987	0.349726	41.8857	0.206655	48.0227	0.316165					-0.808667	0.292182	0.238667	0.542084	0.288	-0.511812	-0.230667	0.192961		-1.24767	0.617154	0.154333	1.03897	0.107333
158	175	16	12.41	2	IGYDVTDVSNVHDDELEF	20.1753	0.354475	28.506	0.489654	38.0443	0.481931	43.683	0.423246		20.319	0.349816	28.2853	0.302432	37.734	0.409545	43.832	0.705096		21.2827	0.105458	28.8643	0.607077	37.925	0.31241	43.7537	0.324368					-0.143667	0.00465906	0.220667	0.187222	0.310333	0.072386	-0.149	-0.281851		-1.10733	0.459932	-0.358333	1.09673	0.119333
161	173	11	9.305	1	DVTDVSNVHDDEL	27.897	0.647083	39.2587	0.396694	45.7557	0.458664	50.2723	0.454599		28.7957	0.705452	38.8037	0.249704	45.3487	0.711801	50.4867	0.627731		29.64	0.663342	39.5977	0.47545	46.0743	0.32736	50.4067	0.216077					-0.898667	-0.0583684	0.455	0.14699	0.407	-0.253137	-0.214333	-0.173132		-1.743	1.31043	-0.339	0.872144	-0.318667
161	174	12	8.715	2	DVTDVSNVHDDELE	26.3327	0.278837	36.514	0.657051	45.1747	0.505618	50.8497	0.149791		26.9933	0.485706	35.8467	0.110346	44.883	0.878733	50.9993	0.118323		27.591	0.555582	36.5373	0.237887	44.976	0.091526	51.108	0.262673					-0.660667	-0.206869	0.667333	0.546705	0.291667	-0.373115	-0.149667	0.031468		-1.25833	0.834419	-0.0233333	0.894938	0.198667
161	175	13	11.7	2	DVTDVSNVHDDELEF	22.628	0.164545	31.2383	0.488733	38.1183	0.580355	43.705	0.139453		22.8623	0.403743	31.1007	0.408879	37.7197	0.303541	43.6863	0.572788		24.0447	0.0070946	31.8283	0.480683	38.086	0.448828	44.1203	0.39097					-0.234333	-0.239198	0.137667	0.079854	0.398667	0.276814	0.0186667	-0.433336		-1.41667	0.171639	-0.59	0.969417	0.0323333
165	173	7	7.5	2	VSNVHDDEL	19.99	0.467195	36.018	0.47548	41.402	0.466055	41.017	0.0836122		20.4363	0.809867	34.9277	0.624591	40.597	1.53608	40.9967	0.473144		21.5467	0.628366	35.719	0.67489	41.2093	0.350596	41.4747	0.508372					-0.446333	-0.342672	1.09033	-0.149112	0.805	-1.07002	0.0203333	-0.389532		-1.55667	1.09556	0.299	1.15037	0.192667
165	175	9	10.89	2	VSNVHDDELEF	14.288	0.175963	24.4903	0.574154	30.041	0.423808	32.5353	0.477511		14.0287	0.464777	24.382	0.290165	30.1017	0.386111	32.28	0.612708		15.788	0.38937	25.074	0.43655	30.3083	0.290107	32.762	0.369625					0.259333	-0.288814	0.108333	0.283988	-0.0606667	0.0376972	0.255333	-0.135197		-1.5	0.565333	-0.583667	1.0107	-0.267333
174	182	7	7.365	2	EFTRRGLVT	3.885	0.386911	5.15667	0.586082	10.1803	0.254052	16.1257	0.131051		4.11367	1.00555	4.48	0.614696	10.5027	0.607676	16.221	0.771945		4.33633	0.203952	5.32467	0.661431	10.6967	0.505198	16.8797	0.290002					-0.228667	-0.618642	0.676667	-0.0286137	-0.322333	-0.353624	-0.0953333	-0.640894		-0.451333	0.590863	-0.168	1.24751	-0.516333
174	195	18	8.56	5	EFTRRGLVTPRMAEVASRDPKL	7.34467	0.0390043	10.7977	0.339149	20.773	0.824756	32.098	0.55529		7.215	0.342755	10.981	0.314971	19.859	0.707913	32.5597	0.575463		7.37633	0.497444	10.816	0.240325	20.3033	0.560036	31.7057	0.53878					0.129667	-0.303751	-0.183333	0.024178	0.914	0.116843	-0.461667	-0.0201727		-0.0316667	0.536448	-0.0183333	0.579474	0.469667
175	182	6	6.57	1	FTRRGLVT	4.035	1.17052	6.18033	0.0783603	11.586	0.418129	19.4457	0.444063		4.36933	0.953059	5.47467	0.990826	11.772	0.842148	18.4773	0.288552		4.75867	0.771516	5.852	0.703925	12.1247	1.11967	19.5847	0.585782					-0.334333	0.217457	0.705667	-0.912466	-0.186	-0.424019	0.968333	0.155511		-0.723667	1.94203	0.328333	0.782286	-0.538667
175	185	8	7.56	3	FTRRGLVTPRM	0.778	0.452408	0.975333	0.656432	6.85533	0.876824	13.7903	0.167643		0.808333	0.440097	0.946333	0.271982	4.498	0.520483	12.115	1.00489		0.785333	0.220355	1.32833	0.111577	6.747	1.50577	12.679	1.28224					-0.0303333	0.012311	0.029	0.384449	2.35733	0.356341	1.67533	-0.837251		-0.00733333	0.672763	-0.353	0.768008	0.108333
176	182	5	5.145	2	TRRGLVT	3.972	0.442709	6.05533	0.726186	13.703	1.18147	22.3627	0.403313		4.46267	1.23849	5.71667	0.646681	13.2303	0.346989	22.141	0.575492		4.885	0.282204	6.43667	0.466714	13.6723	0.17407	22.606	0.21998					-0.490667	-0.795784	0.338667	0.0795051	0.472667	0.834483	0.221667	-0.172179		-0.913	0.724913	-0.381333	1.1929	0.0306667
176	185	7	6.88	2	TRRGLVTPRM	7.194	0.94337	7.264	1.02705	12.1207	0.41626	17.5877	0.686233		4.945	0.854267	5.098	1.13974	11.4457	0.489923	17.5227	0.307737		4.50567	0.37335	6.32333	0.464306	12.1213	0.88458	17.5167	0.761004					2.249	0.0891031	2.166	-0.112693	0.675	-0.0736628	0.065	0.378496		2.68833	1.31672	0.940667	1.49136	-0.000666667
176	187	9	6.705	3	TRRGLVTPRMAE	3.62233	0.29519	5.428	0.709786	11.1557	0.4255	23.6267	0.139231		3.705	0.800816	4.75667	0.786831	10.9493	0.693992	23.7483	0.270271		4.03733	0.417652	5.10833	0.698072	12.407	0.555884	23.3977	0.34725					-0.0826667	-0.505626	0.671333	-0.0770447	0.206333	-0.268491	-0.121667	-0.13104		-0.415	0.712843	0.319667	1.40786	-1.25133
186	195	7	6.355	2	AEVASRDPKL	17.4677	0.518175	26.741	0.341462	42.5343	0.524681	58.3733	0.0635007		18.149	0.841092	26.5987	0.310001	42.1917	1.0643	57.8353	0.783506		18.079	0.966271	26.9043	0.454379	41.716	0.554613	56.6167	0.763872					-0.681333	-0.322917	0.142333	0.031461	0.342667	-0.539615	0.538	-0.720006		-0.611333	1.48445	-0.163333	0.795841	0.818333
188	195	5	5.655	2	VASRDPKL	23.4897	0.806486	34.1633	0.626861	48.802	0.328309	60.6047	0.868477		23.2307	1.16602	33.7653	0.27501	48.066	0.834026	60.5597	1.14412		23.939	0.964135	34.9287	0.742058	47.5747	0.798535	58.556	0.313559					0.259	-0.359536	0.398	0.351851	0.736	-0.505716	0.045	-0.275641		-0.449333	1.77062	-0.765333	1.36892	1.22733
196	211	11	12.075	2	YAMHPWVTSKPLPEYL	27.96	0.0695054	36.4637	0.401911	48.9227	0.245946	58.0677	0.152004		28.3887	0.459859	36.787	0.31014	49.2473	0.0977053	57.7273	0.523164		27.9263	0.37791	36.9497	0.216093	48.273	0.119013	57.5397	0.138164					-0.428667	-0.390354	-0.323333	0.0917706	-0.324667	0.14824	0.340333	-0.371159		0.0336667	0.447416	-0.486	0.618004	0.649667
196	221	21	13.4	4	YAMHPWVTSKPLPEYLWKKIANNCIF	33.285	0.419433	43.6183	0.241558	58.149	0.29415	67.7003	0.249963		33.6083	0.660951	43.5583	0.575724	58.1937	0.494765	67.3697	0.303573		33.2397	0.120592	44.533	0.506116	57.767	0.145661	66.748	0.451331					-0.323333	-0.241518	0.06	-0.334166	-0.0446667	-0.200615	0.330667	-0.05361		0.0453333	0.540025	-0.914667	0.747674	0.382
212	221	8	10.805	1	WKKIANNCIF	23.9127	0.192464	36.9523	0.851167	55.8013	0.359992	60.989	0.231022		24.1997	0.493579	37.2387	0.333167	56.147	0.0868504	61.1863	0.584899		24.6527	0.631256	37.3317	0.529351	55.7287	0.212171	60.624	0.354328					-0.287	-0.301115	-0.286333	0.518	-0.345667	0.273142	-0.197333	-0.353877		-0.74	0.82372	-0.379333	1.38052	0.0726667
222	232	9	4.96	2	IVIHRSTTSQT	34.791	0.556852	35.7263	0.696188	38.14	0.555074	43.689	0.157172		34.0907	0.606032	35.0853	0.706162	38.1267	0.655916	43.445	0.817046		34.619	1.00561	36.6243	0.534604	38.2937	0.556069	43.3273	0.390871					0.700333	-0.0491798	0.641	-0.00997398	0.0133333	-0.100842	0.244	-0.659874		0.172	1.56246	-0.898	1.23079	-0.153667
222	245	20	9.35	4	IVIHRSTTSQTIKVSPDDTPGAIL	12.5583	0.130216	16.73	0.316991	21.0663	0.195398	26.301	0.0475079		12.8273	0.253259	16.4587	0.100759	21.1713	0.650303	26.511	0.0796806		12.9733	0.403436	16.6193	0.260832	21.145	0.127577	26.516	0.180972					-0.269	-0.123043	0.271333	0.216232	-0.105	-0.454905	-0.21	-0.0321727		-0.415	0.533652	0.110667	0.577823	-0.0786667
233	245	9	10.31	2	IKVSPDDTPGAIL	10.8443	0.258666	14.264	0.383317	22.7667	0.218756	32.326	0.254749		11.2787	1.15588	13.5857	0.494	22.786	0.763143	32.191	0.128265		11.6157	0.547078	14.2777	0.501678	23.239	0.374829	32.3763	0.156481					-0.434333	-0.897218	0.678333	-0.110683	-0.0193333	-0.544387	0.135	0.126484		-0.771333	0.805744	-0.0136667	0.884995	-0.472333
249	269	18	7.64	3	FTKMAKKKSLMDIPESQSEQD	54.5007	0.302606	58.3183	0.117236	58.7077	0.541945	58.2463	0.47607		55.3517	0.775465	57.637	0.711717	58.2493	1.53391	57.77	0.539381		54.55	1.00745	57.455	0.382867	58.97	0.975153	58.1473	1.28115					-0.851	-0.472859	0.681333	-0.594481	0.458333	-0.991966	0.476333	-0.0633115		-0.0493333	1.31006	0.863333	0.500103	-0.262333
250	269	17	7.37	2	TKMAKKKSLMDIPESQSEQD	54.2787	1.06759	59.5103	0.142423	60.3547	0.48516	62.6127	0.827213		55.521	0.961936	58.6427	1.03542	60.982	0.859197	61.2663	0.825651		54.0247	0.562895	60.1417	0.453618	61.032	1.2607	62.065	1.37787					-1.24233	0.10565	0.867667	-0.892995	-0.627333	-0.374037	1.34633	0.00156153		0.254	1.63048	-0.631333	0.596041	-0.677333
270	278	7	9.14	3	FVLRVCGRD	4.622	0.176771	6.592	0.602106	12.2807	0.720154	16.1573	0.121706		4.89033	1.10312	6.007	0.507737	12.3677	0.856038	16.0687	0.0674858		5.06833	0.559466	6.69567	0.57225	12.3603	0.454227	16.1973	0.443009					-0.268333	-0.926354	0.585	0.0943692	-0.087	-0.135884	0.0886667	0.0542201		-0.446333	0.736237	-0.103667	1.17436	-0.0796667
270	281	10	11.525	3	FVLRVCGRDEYL	2.70867	0.177506	3.653	0.371786	7.284	0.507672	9.497	0.121787		2.91767	0.544955	3.42167	0.488072	7.20367	0.396677	9.27633	0.259032		3.127	0.484121	3.63333	0.257733	7.313	0.232071	9.37733	0.269945					-0.209	-0.367449	0.231333	-0.116286	0.0803333	0.110996	0.220667	-0.137245		-0.418333	0.661627	0.0196667	0.629519	-0.029
273	281	7	8.035	3	RVCGRDEYL	2.96867	0.0258134	4.47667	0.861371	7.89733	0.810663	9.18533	0.367195		3.742	0.890764	3.45633	0.157906	6.98567	1.28873	8.30667	0.349346		3.60567	0.742856	3.52133	0.7475	7.33833	0.360012	9.02867	0.177399					-0.773333	-0.864951	1.02033	0.703465	0.911667	-0.478071	0.878667	0.0178496		-0.637	0.768669	0.955333	1.60887	0.559
279	291	10	10.735	2	EYLVGETPIKNFQ	12.5207	0.589922	16.3497	0.410853	16.4393	0.206568	20.8017	0.524886		12.259	1.16699	15.662	0.178799	16.4727	0.392556	19.799	0.503674		12.6873	0.494814	15.934	0.206465	16.8217	0.253792	20.8817	0.457358					0.261667	-0.577067	0.687667	0.232054	-0.0333333	-0.185988	1.00267	0.0212125		-0.166667	1.08474	0.415667	0.617319	-0.382333
282	291	7	8.39	2	VGETPIKNFQ	9.75667	0.238548	10.3523	0.324183	11.3733	0.161939	17.134	0.600002		9.939	0.819436	10.0487	0.245194	11.3243	0.837461	17.153	0.394843		9.99533	0.402932	10.154	0.552864	11.442	0.130035	17.3263	0.191474					-0.182333	-0.580887	0.303667	0.0789881	0.049	-0.675521	-0.019	0.205159		-0.238667	0.641481	0.198333	0.877047	-0.0686667
282	307	23	11.63	5	VGETPIKNFQWVRHCLKNGEEIHVVL	4.922	0.130046	13.671	0.546481	18.8643	0.263834	20.2013	0.0921539		5.168	0.355256	13.636	0.330274	19.0223	0.386355	20.0073	0.266836		5.616	0.33209	13.9753	0.0930878	19.1833	0.484006	20.4037	0.523437					-0.246	-0.22521	0.035	0.216206	-0.158	-0.122521	0.194	-0.174682		-0.694	0.462136	-0.304333	0.639568	-0.319
292	302	9	5.775	2	WVRHCLKNGEE	8.12233	0.624695	21.7347	0.719076	25.669	0.188072	27.378	0.383		8.51667	0.743404	21.4937	0.421722	25.64	0.880204	26.8877	0.536489		8.87067	0.836622	21.9033	0.819886	25.6137	0.23256	26.711	0.709429					-0.394333	-0.118708	0.241	0.297354	0.029	-0.692132	0.490333	-0.153489		-0.748333	1.46132	-0.168667	1.53896	0.0553333
292	307	14	9.155	4	WVRHCLKNGEEIHVVL	6.00367	0.206578	17.818	0.537205	24.5783	0.29199	24.3497	0.397827		6.42067	0.544331	17.797	0.186515	24.3187	0.673042	24.5083	0.260454		6.51833	0.631511	17.615	0.405659	24.1017	0.359234	24.436	0.370173					-0.417	-0.337753	0.021	0.350689	0.259667	-0.381052	-0.158667	0.137373		-0.514667	0.838089	0.203	0.942864	0.476667
308	315	3	8.715	1	DTPPDPAL	20.6907	0.745035	43.1183	1.00489	54.279	0.590607	66.698	0.695476		20.962	1.6933	42.3787	0.93912	54.7863	1.0392	67.0043	0.224716		21.3897	1.19108	43.0487	0.739322	54.3013	0.447684	66.4247	0.159438					-0.271333	-0.948266	0.739667	0.0657742	-0.507333	-0.448594	-0.306333	0.47076		-0.699	1.93612	0.0696667	1.74422	-0.0223333
316	335	17	12.82	2	DEVRKEEWPLVDDCTGVTGY	36.3347	0.0904231	44.0537	0.589949	50.0747	0.458094	56.576	0.526345		36.6987	0.434775	43.8917	0.904183	49.9787	0.195659	55.757	0.59304		37.411	0.337403	44.902	0.703861	49.9383	0.541555	56.0823	0.502922					-0.364	-0.344352	0.162	-0.314233	0.096	0.262436	0.819	-0.0666955		-1.07633	0.427826	-0.848333	1.29381	0.136333
316	339	21	12.035	2	DEVRKEEWPLVDDCTGVTGYHEQL	31.3947	0.435553	39.9673	0.265877	47.4583	0.668597	53.467	0.0950158		31.6403	0.24379	39.7337	0.71839	47.172	0.399128	53.2637	0.728643		32.586	0.445115	40.2933	0.672458	47.5327	0.777725	53.1607	0.879654					-0.245667	0.191763	0.233667	-0.452514	0.286333	0.269469	0.203333	-0.633627		-1.19133	0.880667	-0.326	0.938335	-0.0743333
316	350	32	11.395	5	DEVRKEEWPLVDDCTGVTGYHEQLTIHGKDHESVF	21.263	0.22229	28.287	0.333195	36.072	0.502299	41.0263	0.376904		21.0563	0.280543	28.1087	0.297036	36.0493	0.322753	40.6533	0.761105		21.8923	0.568431	28.3437	0.282788	35.9783	0.417948	40.6123	0.560826					0.206667	-0.0582526	0.178333	0.0361592	0.0226667	0.179546	0.373	-0.384201		-0.629333	0.790722	-0.0566667	0.615984	0.0936667
336	350	13	7.79	2	HEQLTIHGKDHESVF	13.4323	0.415324	23.269	0.539262	35.471	0.68187	36.8493	0.368714		13.064	0.784051	21.9847	0.407964	34.9497	0.618542	39.0903	0.863996		14.805	0.82686	22.7527	0.837205	35.801	0.311032	37.7073	0.661836					0.368333	-0.368727	1.28433	0.131298	0.521333	0.0633281	-2.241	-0.495282		-1.37267	1.24218	0.516333	1.37647	-0.33
340	350	9	7.055	2	TIHGKDHESVF	14.879	0.487573	21.9753	0.353967	27.1843	0.876101	28.0263	0.42595		14.782	0.590752	21.662	0.18438	27.571	0.869745	27.6727	0.471429		15.3937	0.46836	21.6443	0.426868	27.9557	0.50124	28.016	0.529368					0.097	-0.10318	0.313333	0.169587	-0.386667	0.00635528	0.353667	-0.0454791		-0.514667	0.955933	0.331	0.780835	-0.771333
355	361	5	9.045	3	WDCDRKF	7.62067	1.52986	19.0477	0.616903	30.734	0.747219	31.5493	1.2655		9.932	1.24709	18.81	1.31747	29.6033	0.663947	31.1193	0.886895		8.04433	1.53054	19.3893	1.01214	27.7413	0.339877	31.838	1.11467					-2.31133	0.282766	0.237667	-0.700566	1.13067	0.0832721	0.43	0.378602		-0.423667	3.0604	-0.341667	1.62904	2.99267
355	379	21	10.69	4	WDCDRKFRVKIRGIDIPVLPRNTDL	12.8677	0.242768	18.0337	0.37525	20.3013	0.239124	24.218	0.521831		13.1557	0.311632	17.6667	0.523299	20.1873	0.323945	23.9247	0.498725		13.1373	0.463484	17.8173	0.452118	20.351	0.292898	23.3643	0.319196					-0.288	-0.0688637	0.367	-0.14805	0.114	-0.0848209	0.293333	0.0231067		-0.269667	0.706252	0.216333	0.827367	-0.0496667
355	381	23	11.11	4	WDCDRKFRVKIRGIDIPVLPRNTDLTV	13.0513	0.185608	18.9557	0.23284	24.1373	0.598629	26.7423	0.445665		12.942	0.307556	19.0967	0.454023	24.305	0.62662	27.6333	0.901843		13.141	0.152233	19.0823	0.466633	24.6013	0.335245	27.8797	0.884501					0.109333	-0.121948	-0.141	-0.221184	-0.167667	-0.0279916	-0.891	-0.456178		-0.0896667	0.337841	-0.126667	0.699473	-0.464
370	381	9	10.465	2	IPVLPRNTDLTV	39.18	0.31735	49.7153	0.6925	59.6993	0.139937	65.9603	0.821225		39.5177	0.681528	49.362	0.235688	59.6303	0.582203	66.1683	0.353957		39.4483	0.340606	50.134	0.534626	59.826	0.260236	65.8507	0.151662					-0.337667	-0.364178	0.353333	0.456812	0.069	-0.442266	-0.208	0.467268		-0.268333	0.657956	-0.418667	1.22713	-0.126667
380	394	13	10.525	2	TVFVEANIQHGQQVL	8.366	0.308122	11.064	0.346987	12.3363	0.252431	18.4193	0.279466		8.851	0.446113	11.0203	0.0819898	12.184	0.188741	18.3777	0.246529		8.636	0.300821	10.9777	0.252417	12.3917	0.392597	18.5817	0.262611					-0.485	-0.137991	0.0436667	0.264997	0.152333	0.0636903	0.0416667	0.0329376		-0.27	0.608942	0.0863333	0.599404	-0.0553333
382	394	11	9.465	2	FVEANIQHGQQVL	11.3707	0.231893	17.8933	0.4032	19.527	0.448335	27.1863	0.322568		11.9307	0.685612	17.4353	0.344866	19.611	0.721146	27.067	0.186164		12.1363	0.457924	18.0093	0.321499	19.75	0.159912	27.0597	0.282985					-0.56	-0.453719	0.458	0.0583344	-0.084	-0.272811	0.119333	0.136404		-0.765667	0.689817	-0.116	0.724699	-0.223
383	394	10	8.235	2	VEANIQHGQQVL	13.3343	0.294002	22.564	0.346501	25.3557	0.46394	33.462	0.0828191		13.906	0.881522	22.0853	0.358341	25.0417	0.916588	33.113	0.346866		14.5597	0.744215	22.9413	0.457712	25.4317	0.173339	33.4017	0.155053					-0.571667	-0.58752	0.478667	-0.01184	0.314	-0.452648	0.349	-0.264047		-1.22533	1.03822	-0.377333	0.804213	-0.076
386	394	7	7.525	1	NIQHGQQVL	18.804	0.957429	29.1903	0.622592	31.453	0.657665	42.0943	0.603776		18.75	0.962155	28.9753	0.518974	32.4107	0.168693	42.3637	0.785724		19.4873	1.16825	29.1607	1.16663	31.057	0.773762	42.75	0.146058					0.054	-0.00472602	0.215	0.103618	-0.957667	0.488972	-0.269333	-0.181948		-0.683333	2.12568	0.0296667	1.78922	0.396
395	406	8	5.53	2	CQRRTSPKPFTE	14.5	0.101533	21.6977	0.549192	29.449	0.33256	38.6377	0.450584		15.899	1.27004	21.3443	0.541924	29.98	0.756564	38.1023	0.298512		16.1993	0.157386	22.0577	0.324149	30	0.53418	38.758	0.584377					-1.399	-1.1685	0.353333	0.0072687	-0.531	-0.424004	0.535333	0.152073		-1.69933	0.258919	-0.36	0.873341	-0.551
408	413	4	14.635	1	VLWNVW	10.2833	0.586823	29.4263	0.187014	41.9503	0.704924	50.4833	1.15712		11.121	0.541449	29.857	0.28461	41.97	0.699019	52.299	0.656117		12.8253	0.886019	31.1623	0.517171	43.6093	0.688407	54.117	1.01898					-0.837667	0.0453741	-0.430667	-0.097596	-0.0196667	0.00590432	-1.81567	0.501006		-2.542	1.47284	-1.736	0.704186	-1.659
414	428	12	11.025	3	LEFSIKIKDLPKGAL	6.822	0.141184	7.795	0.137579	12.945	0.252834	21.9333	0.889232		6.91633	0.366182	8.19667	0.440598	13.0077	0.444316	22.0863	0.0885005		6.77567	0.388968	7.9	0.106691	13.1907	0.358481	22.6553	0.107705					-0.0943333	-0.224998	-0.401667	-0.303019	-0.0626667	-0.191482	-0.153	0.800732		0.0463333	0.530153	-0.105	0.24427	-0.245667
417	428	9	8.56	3	SIKIKDLPKGAL	2.35467	0.300859	3.09733	0.341869	4.90433	0.496171	13.8633	0.0649333		2.671	0.796823	2.64167	0.534743	4.87	0.812523	13.7387	0.158885		2.943	0.430965	3.212	0.489776	5.31	0.086122	14.6143	0.172529					-0.316333	-0.495964	0.455667	-0.192874	0.0343333	-0.316352	0.124667	-0.0939514		-0.588333	0.731825	-0.114667	0.831645	-0.405667
417	429	10	9.65	3	SIKIKDLPKGALL	2.40567	0.338544	3.296	0.0832346	4.73	1.13155	12.258	0.432135		2.677	0.603629	2.41033	0.601154	4.76233	0.587714	11.9063	0.743924		2.84133	0.402828	3.272	0.613968	4.875	0.364675	13.307	0.349913					-0.271333	-0.265085	0.885667	-0.51792	-0.0323333	0.543832	0.351667	-0.311788		-0.435667	0.741372	0.024	0.697203	-0.145
432	441	7	9.405	1	QIYCGKAPAL	45.748	0.613159	49.2873	1.0805	53.6527	1.01956	56.7617	0.885624		46.782	0.456118	48.8613	0.601572	53.1737	1.11488	57.909	0.696776		46.9443	0.692247	51.4787	0.292476	55.0533	0.408689	57.343	0.511956					-1.034	0.157041	0.426	0.478932	0.479	-0.095318	-1.14733	0.188848		-1.19633	1.30541	-2.19133	1.37298	-1.40067
461	467	5	14.22	2	LYYVNLL	0.983	0.322061	1.74433	0.927097	6.48567	0.868144	17.1157	0.668515		1.45833	0.790687	1.14733	0.557754	6.05833	1.00186	16.971	0.595929		1.88	0.373731	2.61667	0.379979	6.56533	0.836636	16.3993	0.662571					-0.475333	-0.468626	0.597	0.369343	0.427333	-0.133711	0.144667	0.0725863		-0.897	0.695792	-0.872333	1.30708	-0.0796667
463	468	4	13.8	1	YVNLLL	1.49867	0.542817	3.735	1.29468	7.751	0.590954	23.0483	1.04706		1.69567	0.390167	2.16267	0.462257	8.56367	0.497676	22.67	0.716819		1.71	0.752348	2.46	0.246152	7.735	0.464025	22.9417	0.553211					-0.197	0.15265	1.57233	0.832424	-0.812667	0.0932784	0.378333	0.330242		-0.211333	1.29517	1.275	1.54083	0.016
467	475	7	12.425	3	LLIDHRFLL	1.83567	0.344515	1.944	0.477812	2.96833	1.57621	3.08233	0.568121		2.31533	0.926441	2.06133	0.194403	3.333	1.02289	2.052	0.491049		1.96667	0.430638	1.79867	0.629462	2.424	0.529283	2.993	0.703853					-0.479667	-0.581926	-0.117333	0.283409	-0.364667	0.553315	1.03033	0.077072		-0.131	0.775153	0.145333	1.10727	0.544333
467	479	11	9.39	4	LLIDHRFLLRRGE	3.53033	0.361243	8.953	0.278534	12.1707	0.755361	15.1377	0.168049		3.788	0.345892	8.76267	0.264281	12.344	0.554719	15.1117	0.264122		3.92933	0.303009	8.95733	0.219787	12.4197	0.128508	15.1797	0.0802268					-0.257667	0.0153512	0.190333	0.0142529	-0.173333	0.200642	0.026	-0.0960732		-0.399	0.664252	-0.00433333	0.498321	-0.249
467	480	12	9.955	4	LLIDHRFLLRRGEY	3.39867	0.242982	8.76	1.09041	11.2217	0.182837	13.7743	0.0328684		3.72	0.456593	7.82867	0.273928	11.4233	0.432865	13.726	0.121742		3.94	0.334106	8.227	0.488691	11.4977	0.0532009	13.9367	0.149721					-0.321333	-0.213611	0.931333	0.816482	-0.201667	-0.250028	0.0483333	-0.0888731		-0.541333	0.577088	0.533	1.5791	-0.276
485	497	11	10.21	2	WQISGKGEDQGSF	58.541	1.07612	60.9633	1.28813	66.2457	0.171436	65.4013	0.732798		59.5187	1.03948	60.721	0.752797	65.6077	0.929996	66.4693	0.0756395		58.446	0.15037	60.029	1.05236	65.8997	0.506869	66.3237	0.807307					-0.977667	0.0366462	0.242333	0.535336	0.638	-0.75856	-1.068	0.657158		0.095	1.22649	0.934333	2.34049	0.346
498	513	13	5.55	2	NADKLTSATNPDKENS	19.5727	0.589782	30.117	0.785443	38.7087	0.379358	48.5393	0.721492		21.629	0.756552	29.4927	0.340747	38.1953	0.852151	48.333	1.2694		21.5083	1.03	31.927	1.1152	41.7347	0.148382	53.8623	0.457592					-2.05633	-0.16677	0.624333	0.444696	0.513333	-0.472793	0.206333	-0.547907		-1.93567	1.61978	-1.81	1.90064	-3.026
498	514	14	6.715	3	NADKLTSATNPDKENSM	19.045	0.641133	30.208	0.756843	39.8747	0.142423	48.5337	0.340186		19.597	1.08696	29.7877	0.551787	39.5237	0.897422	47.481	0.872022		19.927	1.05458	31.9203	0.560765	42.653	0.991475	54.565	1.03234					-0.552	-0.445826	0.420333	0.205056	0.351	-0.754999	1.05267	-0.531837		-0.882	1.69571	-1.71233	1.31761	-2.77833
498	515	15	6.405	3	NADKLTSATNPDKENSMS	17.6337	0.445814	28.4427	0.754189	37.093	0.287312	45.4433	0.122985		18.206	1.11515	27.8217	0.296487	36.2917	1.16507	44.1773	0.775557		18.9687	1.16749	29.5097	0.738575	39.4073	0.473113	49.9073	0.76398					-0.572333	-0.66934	0.621	0.457703	0.801333	-0.877758	1.266	-0.652572		-1.335	1.6133	-1.067	1.49276	-2.31433
498	517	17	7.63	3	NADKLTSATNPDKENSMSIS	14.5347	0.539683	23.121	0.491443	29.9767	0.502653	36.134	0.510415		15.126	0.768376	22.7587	0.652094	30.2087	1.02959	35.7577	0.476693		15.1323	0.859636	24.003	0.541866	32.2727	0.196607	40.5643	0.842307					-0.591333	-0.228693	0.362333	-0.160651	-0.232	-0.526935	0.376333	0.0337214		-0.597667	1.39932	-0.882	1.03331	-2.296
498	519	19	10.915	3	NADKLTSATNPDKENSMSISIL	10.422	0.0223383	16.079	0.589621	20.718	0.161391	25.1643	0.0387986		10.587	0.298618	16	0.265045	20.4483	0.358506	25.239	0.428714		10.8957	0.382194	16.3673	0.0257747	21.961	0.488562	28.7063	0.171273					-0.165	-0.27628	0.079	0.324576	0.269667	-0.197115	-0.0746667	-0.389916		-0.473667	0.404532	-0.288333	0.615396	-1.243
520	551	24	9.12	4	LDNYCHPIALPKHQPTPDPEGDRVRAEMPNQL	38.581	0.485519	44.1073	0.511953	47.992	0.377652	49.5807	0.274977		39.233	0.825809	43.991	0.433948	48.0063	0.36983	49.141	0.43516		39.403	0.42618	44.4347	0.263942	47.904	0.250857	49.355	0.08937					-0.652	-0.34029	0.116333	0.0780053	-0.0143333	0.00782181	0.439667	-0.160183		-0.822	0.911699	-0.327333	0.775895	0.088
552	557	4	4.47	2	RKQLEA	12.4963	1.12337	21.7643	0.962073	37.2773	0.359639	73.0337	0.611253		13.4263	0.940721	20.9883	0.448813	36.6923	0.855024	73.152	0.642759		14.6897	0.440489	23.155	1.47226	39.7013	0.630719	75.7477	0.663402					-0.93	0.182648	0.776	0.51326	0.585	-0.495384	-0.118333	-0.0315058		-2.19333	1.56386	-1.39067	2.43433	-2.424
557	575	15	12.855	2	AIIATDPLNPLTAEDKELL	18.593	0.506116	27.8213	0.888862	44.165	1.15169	55.8677	0.602217		19.3163	1.52204	26.1597	1.11496	44.0313	0.609368	56.8313	0.223001		19.9143	0.936014	29.291	0.470475	45.4457	1.03083	60.147	0.475129					-0.723333	-1.01592	1.66167	-0.226101	0.133667	0.542325	-0.963667	0.379216		-1.32133	1.44213	-1.46967	1.35934	-1.28067
557	578	18	13.995	3	AIIATDPLNPLTAEDKELLWHF	14.5863	0.204219	21.8223	0.361727	35.1457	0.719004	48.051	0.222432		15.3367	0.94838	21.879	0.919606	34.6127	0.462699	48.344	0.687514		14.7577	0.69731	23.5283	0.235233	36.1787	0.743027	50.3187	0.650874					-0.750333	-0.744161	-0.0566667	-0.55788	0.533	0.256305	-0.293	-0.465082		-0.171333	0.901529	-1.706	0.596959	-1.033
558	570	9	11.885	1	IIATDPLNPLTAE	32.4683	0.713838	46.766	0.428592	69.2637	0.467206	74.9827	0.375532		32.942	1.02654	46.4373	0.0428525	69.2633	0.406696	75.3027	0.417786		34.382	0.969163	49.421	0.666591	70.057	0.653239	73.627	0.891201					-0.473667	-0.312706	0.328667	0.385739	0.000333333	0.0605103	-0.32	-0.0422542		-1.91367	1.683	-2.655	1.09518	-0.793333
558	573	12	10.85	2	IIATDPLNPLTAEDKE	24.8563	0.309692	35.5947	0.646792	53.0413	0.811491	62.0567	0.608515		25.5193	0.739189	35.1377	0.365274	53.2787	0.640013	62.0953	0.915808		26.5483	0.287611	37.9287	0.433482	54.711	0.241352	63.8903	0.380936					-0.663	-0.429497	0.457	0.281518	-0.237333	0.171478	-0.0386667	-0.307293		-1.692	0.597304	-2.334	1.08027	-1.66967
558	578	17	14.085	3	IIATDPLNPLTAEDKELLWHF	15.382	0.416069	22.2763	0.678815	34.9103	0.0974491	45.2523	0.288009		15.3407	0.510467	21.992	0.251537	35.394	0.250501	45.32	0.610489		16.4113	0.506749	24.0007	0.15982	36.544	0.289363	48.381	0.550281					0.0413333	-0.0943983	0.284333	0.427278	-0.483667	-0.153052	-0.0676667	-0.32248		-1.02933	0.922817	-1.72433	0.838635	-1.63367
558	580	19	13.12	4	IIATDPLNPLTAEDKELLWHFRY	14.0163	0.547307	21.611	0.547518	35.4147	0.283645	45.426	0.346654		14.4643	0.600821	21.5577	0.727321	35.8233	0.87847	44.975	0.272061		14.7947	0.594314	23.4103	0.117185	37.055	0.715438	48.854	0.480715					-0.448	-0.0535132	0.0533333	-0.179803	-0.408667	-0.594826	0.451	0.0745934		-0.778333	1.14162	-1.79933	0.664703	-1.64033
579	592	10	6.525	4	RYESLKHPKAYPKL	3.331	0.227502	10.611	0.627015	20.4623	0.618536	40.0727	0.470574		4.079	1.25323	10.1017	0.0669801	19.8567	1.20101	38.6483	0.554879		4.045	0.259405	11.5073	0.319979	23.337	0.530008	46.4873	0.859757					-0.748	-1.02572	0.509333	0.560035	0.605667	-0.582472	1.42433	-0.0843042		-0.714	0.486907	-0.896333	0.946994	-2.87467
593	601	7	9.16	1	FSSVKWGQQ	6.01067	0.83347	13.4627	1.07896	35.8133	1.28058	69.9897	0.148264		6.04867	0.765027	12.8433	0.269535	35.844	0.686002	69.2743	0.305261		7.49933	1.14486	14.9427	0.643822	41.9077	0.894284	75.2853	0.300117					-0.038	0.068443	0.619333	0.809428	-0.0306667	0.594579	0.715333	-0.156997		-1.48867	1.97833	-1.48	1.72279	-6.09433
593	605	11	10.72	2	FSSVKWGQQEIVA	7.654	0.21811	13.357	0.500675	27.0663	0.166506	57.2493	0.434293		8.13967	0.488206	13.5737	0.0518588	27.1983	0.211344	57.5853	0.369595		8.23633	0.351093	14.282	0.557406	31.1677	0.431821	62.4383	0.142339					-0.485667	-0.270096	-0.216667	0.448816	-0.132	-0.0448379	-0.336	0.0646981		-0.582333	0.569203	-0.925	1.05808	-4.10133
593	610	16	11.035	2	FSSVKWGQQEIVAKTYQL	5.36433	0.408529	9.67733	0.190841	20.9023	0.192204	57.3973	0.530977		5.58167	0.444722	9.45233	0.0818189	20.7273	0.882577	55.561	0.540892		6.02067	0.61001	9.934	0.120017	23.4853	0.317947	64.6407	0.499596					-0.217333	-0.0361922	0.225	0.109022	0.175	-0.690373	1.83633	-0.00991508		-0.656333	1.01854	-0.256667	0.310858	-2.583
593	611	17	12.605	3	FSSVKWGQQEIVAKTYQLL	3.85467	0.128535	7.74467	0.211519	17.4083	0.3445	48.518	0.329988		3.95033	0.0620511	7.348	0.134547	17.516	0.383782	47.8123	0.929145		4.30367	0.0328684	8.097	0.687236	20.2897	0.359212	57.054	0.96782					-0.0956667	0.0664843	0.396667	0.0769717	-0.107667	-0.0392824	0.705667	-0.599157		-0.449	0.161404	-0.352333	0.898755	-2.88133
602	607	4	4.955	1	EIVAKT	2.531	0.18796	5.43367	1.52629	11.9083	0.336009	38.892	0.29802		3.74533	1.34204	4.84167	1.03981	12.019	0.754587	38.3307	0.6225		4.97267	1.09069	6.19167	0.921356	16.529	0.610983	52.6497	0.739868					-1.21433	-1.15408	0.592	0.486486	-0.110667	-0.418577	0.561333	-0.32448		-2.44167	1.27865	-0.758	2.44765	-4.62067
606	611	4	10.155	2	KTYQLL	3.17067	0.127954	9.30533	0.693424	19.4353	0.961151	45.2987	0.356828		3.77367	0.658014	6.658	1.33712	19.921	0.812249	48.2623	0.521154		3.325	1.02932	5.51667	0.965109	22.3833	0.594718	51.848	1.05457					-0.603	-0.53006	2.64733	-0.643693	-0.485667	0.148902	-2.96367	-0.164326		-0.154333	1.15727	3.78867	1.65853	-2.948
611	622	10	9.715	2	LARREVWDQSAL	60.1593	0.605116	65.3507	0.75241	65.347	0.0727461	64.978	0.382443		60.7473	0.278687	64.5937	0.525704	65.3143	1.16019	65.0177	0.50158		60.6967	0.254498	65.156	0.846075	65.1427	0.224193	65.0473	0.132289					-0.588	0.326429	0.757	0.226706	0.0326667	-1.08745	-0.0396667	-0.119136		-0.537333	0.859614	0.194667	1.59848	0.204333
612	622	9	9.51	3	ARREVWDQSAL	61.7107	0.728423	65.4793	1.10474	65.2797	0.314363	64.7143	0.750494		62.8073	0.615654	64.647	0.56041	65.2083	1.31866	65.153	0.167419		61.793	1.32681	64.9747	0.691876	65.158	0.470841	65.0737	0.262409					-1.09667	0.112769	0.832333	0.544331	0.0713333	-1.0043	-0.438667	0.583075		-0.0823333	2.05523	0.504667	1.79662	0.121667
623	630	6	12.39	1	DVGLTMQL	5.20167	0.834233	16.1757	1.14826	21.3543	0.713169	42.4553	0.298185		7.09567	1.04657	16.9477	1.32917	24.357	0.415332	39.485	0.760547		5.87267	0.56458	16.0937	1.51248	22.0517	1.39989	44.2003	0.74124					-1.894	-0.212336	-0.772	-0.180908	-3.00267	0.297836	2.97033	-0.462361		-0.671	1.39881	0.082	2.66074	-0.697333
623	631	7	13.94	2	DVGLTMQLL	5.22533	0.222487	11.673	0.421437	17.9767	1.12171	32.5853	0.381539		4.64067	0.672802	12.678	0.989325	17.9893	0.995415	32.902	0.586719		6.61233	0.529065	13.294	0.924552	18.871	1.18303	36.258	0.54044					0.584667	-0.450315	-1.005	-0.567888	-0.0126667	0.12629	-0.316667	-0.205179		-1.387	0.751551	-1.621	1.34599	-0.894333
631	635	3	11.075	1	LDCNF	5.26967	0.172573	13.4213	0.923321	40.6447	0.411128	62.3787	0.339538		5.86467	1.08827	12.5453	1.06754	40.58	0.601449	62.3113	1.25029		7.359	1.37545	16.2317	0.239759	46.417	0.588023	62.7613	0.273847					-0.595	-0.915698	0.876	-0.144216	0.0646667	-0.190321	0.0673333	-0.910756		-2.08933	1.54802	-2.81033	1.16308	-5.77233
636	642	5	4.69	1	SDENVRA	10.9603	0.70836	13.509	0.645672	18.3593	0.433362	26.482	0.411654		12.3167	1.95251	12.6937	0.93379	19.1147	0.538617	27.1197	1.10749		12.9053	1.35998	14.2817	1.01591	19.5847	0.552089	28.223	0.862278					-1.35633	-1.24415	0.815333	-0.288119	-0.755333	-0.105255	-0.637667	-0.695835		-1.945	2.06834	-0.772667	1.66158	-1.22533
643	657	13	11.7	2	IAVQKLESLEDDDVL	12.5457	0.308562	17.5187	0.445707	20.8663	0.43587	32.574	0.493639		12.5247	0.425366	17.3023	0.364303	20.971	0.44824	32.43	0.209516		13.172	0.274771	17.7707	0.512213	22.213	0.612737	33.4643	0.325001					0.021	-0.116804	0.216333	0.081404	-0.104667	-0.0123703	0.144	0.284122		-0.626333	0.583333	-0.252	0.95792	-1.34667
643	662	18	13.785	3	IAVQKLESLEDDDVLHYLLQ	6.61267	0.185829	10.425	0.158937	15.998	0.216333	25.8547	0.51352		6.675	0.128651	10.4153	0.231738	16.052	0.199872	25.9687	0.252571		7.029	0.51541	10.914	0.213937	17.1503	0.403738	26.6803	0.646883					-0.0623333	0.0571781	0.00966667	-0.0728005	-0.054	0.0164606	-0.114	0.260948		-0.416333	0.701238	-0.489	0.372874	-1.15233
643	663	19	14.38	3	IAVQKLESLEDDDVLHYLLQL	5.016	0.334393	8.82733	0.319589	14.7507	0.477996	24.706	0.832676		5.68767	0.167249	8.71733	0.104567	14.84	0.3154	25.4057	0.830278		5.35033	0.38773	9.001	0.295318	15.722	0.281302	26.2207	0.577044					-0.671667	0.167144	0.11	0.215022	-0.0893333	0.162596	-0.699667	0.00239734		-0.334333	0.722123	-0.173667	0.614908	-0.971333
651	663	11	14.505	3	LEDDDVLHYLLQL	0.884333	0.610222	2.151	0.366165	11.3643	0.137442	22.7937	0.607972		0.262667	0.162396	2.037	0.714145	12.1927	0.530725	21.2983	0.541843		0.761	0.64243	2.47267	1.15194	12.494	0.331326	23.4107	0.441828					0.621667	0.447826	0.114	-0.34798	-0.828333	-0.393283	1.49533	0.0661289		0.123333	1.25265	-0.321667	1.5181	-1.12967
652	662	9	13.535	2	EDDDVLHYLLQ	3.11567	1.13456	4.938	0.648225	13.5817	0.484554	25.6433	0.367236		2.97033	1.45564	4.13533	0.785509	13.9807	0.975562	26.8197	0.221202		3.304	0.823117	5.47967	1.02439	17.1317	0.593533	26.4023	0.283542					0.145333	-0.321083	0.802667	-0.137284	-0.399	-0.491008	-1.17633	0.146034		-0.188333	1.95768	-0.541667	1.67262	-3.55
652	663	10	14.445	2	EDDDVLHYLLQL	4.65	0.634983	6.39233	0.246531	14.0317	0.923802	23.7477	1.38694		4.462	0.205468	4.78567	0.670774	14.2297	1.23919	25.2857	0.23672		4.94367	0.847614	6.98167	0.538242	18.0783	0.303978	28.227	0.93725					0.188	0.429515	1.60667	-0.424243	-0.198	-0.315387	-1.538	1.15022		-0.293667	1.4826	-0.589333	0.784772	-4.04667
654	662	7	13.365	2	DDVLHYLLQ	1.801	0.998505	2.96733	0.550949	14.9307	0.46513	30.6797	1.05754		1.82567	0.694141	3.20033	0.323199	14.7447	0.924697	30.3487	0.453371		2.27667	0.512244	3.07067	0.532381	17.3873	0.430495	30.403	0.813808					-0.0246667	0.304363	-0.233	0.227751	0.186	-0.459566	0.331	0.604174		-0.475667	1.51075	-0.103333	1.08333	-2.45667
655	662	6	13.16	2	DVLHYLLQ	1.935	0.836782	4.41733	0.44455	17.9093	0.453912	38.1187	1.24562		2.155	0.700435	4.10833	0.225061	18.19	0.229867	37.9477	0.794935		1.82433	0.152165	5.36467	0.244737	20.7813	0.0983379	38.6887	0.418815					-0.22	0.136347	0.309	0.219489	-0.280667	0.224045	0.171	0.450683		0.110667	0.988947	-0.947333	0.689287	-2.872
655	663	7	14.585	2	DVLHYLLQL	1.42133	0.180777	3.63267	0.479059	16.8723	0.322233	34.71	0.337963		1.53133	0.290113	3.38867	0.24193	16.9843	0.450371	34.8973	0.238137		1.74733	0.319107	4.44167	0.383053	19.926	0.417036	35.588	0.338869					-0.11	-0.109336	0.244	0.237128	-0.112	-0.128138	-0.187333	0.0998258		-0.326	0.499884	-0.809	0.862111	-3.05367
658	663	4	12.095	1	HYLLQL	1.12467	0.291413	2.91667	0.661719	11.8867	1.09599	22.904	0.159446		1.07867	0.151196	2.914	0.289998	12.0573	0.553646	23.158	0.262519		1.66567	0.218775	3.223	0.265565	13.572	0.183229	23.0803	0.630779					0.046	0.140216	0.00266667	0.371721	-0.170667	0.542347	-0.254	-0.103073		-0.541	0.510187	-0.306333	0.927285	-1.68533
663	677	12	10.12	3	LVQAVKFEPYHDSAL	2.70967	0.444446	6.503	0.435179	7.86267	0.461798	9.598	0.122012		3.213	0.851969	6.34267	0.0339755	8.28367	0.890731	9.51367	0.307516		3.36767	0.245105	6.748	0.351168	8.03767	0.238668	9.47467	0.385435					-0.503333	-0.407523	0.160333	0.401204	-0.421	-0.428933	0.0843333	-0.185504		-0.658	0.689551	-0.245	0.786347	-0.175
664	677	11	9.55	2	VQAVKFEPYHDSAL	3.26467	0.25641	7.62	0.539762	8.909	0.122282	10.6773	0.135515		3.529	0.535185	7.23733	0.332001	8.99367	0.402201	10.704	0.116529		3.77933	0.223191	7.49267	0.263519	9.097	0.0883403	10.9777	0.14103					-0.264333	-0.278775	0.382667	0.207761	-0.0846667	-0.279918	-0.0266667	0.0189861		-0.514667	0.479602	0.127333	0.803281	-0.188
666	677	9	9.225	2	AVKFEPYHDSAL	3.89333	0.202527	9.25033	0.303101	11.0413	0.175392	13.1743	0.241256		4.08533	0.97067	8.64067	0.694334	11.2137	1.15555	13.275	0.234066		4.58767	0.445994	9.36533	0.464018	11.3733	0.219295	13.4747	0.337479					-0.192	-0.768143	0.609667	-0.391233	-0.172333	-0.980153	-0.100667	0.00718951		-0.694333	0.648521	-0.115	0.767119	-0.332
681	697	15	10.665	5	LLKRGLRNKRIGHFLFW	0.698	0.0488774	0.705667	0.183699	1.43067	0.0797517	2.564	0.195008		0.788333	0.339424	0.768	0.138112	1.33367	0.254543	2.67267	0.0898462		1.04133	0.269277	0.941667	0.204688	1.56267	0.122659	2.79033	0.0530031					-0.0903333	-0.290546	-0.0623333	0.0455868	0.097	-0.174792	-0.108667	0.105162		-0.343333	0.318155	-0.236	0.388387	-0.132
698	713	14	7.975	4	FLRSEIAQSRHYQQRF	4.85567	0.0369639	7.36633	0.381605	16.5317	0.516203	27.432	0.506296		5.25567	0.637075	6.81367	0.203643	16.3797	0.710364	27.484	0.513033		5.46833	0.349646	8.428	0.290742	18.8187	0.127052	28.326	0.36491					-0.4	-0.600111	0.552667	0.177962	0.152	-0.194161	-0.052	-0.00673678		-0.612667	0.38661	-1.06167	0.672347	-2.287
700	713	12	6.21	4	RSEIAQSRHYQQRF	4.08733	0.167097	6.61033	0.27723	15.4443	0.18635	28.1313	0.385425		4.506	0.6653	6.36233	0.292343	14.8803	0.571546	27.4013	0.513802		4.86133	0.591618	7.78067	0.576764	17.6787	0.472963	28.0797	0.469677					-0.418667	-0.498203	0.248	-0.0151131	0.564	-0.385196	0.73	-0.128377		-0.774	0.758715	-1.17033	0.853993	-2.23433
704	713	8	6.16	3	AQSRHYQQRF	6.41433	0.497317	9.456	0.719571	18.0413	0.267051	34.0447	1.06471		6.569	0.413004	8.497	0.665464	19.1633	0.881687	33.5087	1.1228		6.77533	0.331286	10.2763	1.11843	20.63	0.938211	35.0503	1.23246					-0.154667	0.0843135	0.959	0.0541069	-1.122	-0.614636	0.536	-0.0580899		-0.361	0.828603	-0.820333	1.838	-2.58867
714	719	4	9.545	1	AVILEA	0.624667	0.458814	0.963667	0.765392	1.12167	0.788435	1.77333	0.460175		0.660333	0.415495	1.14467	0.329546	1.38467	0.285756	1.28667	0.0983379		1.13067	0.0898573	1.016	0.387752	1.71933	0.422139	1.484	0.284501					-0.0356667	0.0433188	-0.181	0.435846	-0.263	0.50268	0.486667	0.361837		-0.506	0.548671	-0.0523333	1.15314	-0.597667
720	729	8	10.49	2	YLRGCGTAML	3.26933	0.16298	9.22333	0.65583	15.942	0.231359	37.7627	0.344639		3.641	0.571396	8.45833	0.175215	16.3233	0.519918	39.3193	0.385116		3.70667	0.515496	8.82833	0.918221	15.6657	0.160855	37.8477	0.39748					-0.371667	-0.408416	0.765	0.480614	-0.381333	-0.288559	-1.55667	-0.0404766		-0.437333	0.678476	0.395	1.57405	0.276333
729	738	8	9.445	2	LHDFTQQVQV	1.66567	0.301503	2.173	0.461722	2.093	0.448119	2.47267	0.191636		2.24667	1.23188	1.81833	0.534245	2.15733	0.621843	2.44533	0.286971		2.68633	0.676766	2.34567	0.703746	2.35967	0.0974953	3.06267	0.797822					-0.581	-0.930375	0.354667	-0.0725229	-0.0643333	-0.173724	0.0273333	-0.095335		-1.02067	0.97827	-0.172667	1.16547	-0.266667
730	737	6	6.7	1	HDFTQQVQ	2.33033	0.936434	2.608	1.25251	1.74833	0.654142	2.48433	0.890019		1.88	0.152227	2.24233	0.392905	2.49033	0.913241	2.812	0.710104		2.493	0.315419	2.62933	0.504517	2.53633	0.753692	2.415	0.343472					0.450333	0.784207	0.365667	0.859602	-0.742	-0.259099	-0.327667	0.179915		-0.162667	1.25185	-0.0213333	1.75702	-0.788
730	738	7	8.615	2	HDFTQQVQV	2.34567	0.682831	2.579	0.780948	2.45233	0.543516	2.74167	0.398638		2.151	0.84666	1.736	0.319205	2.77333	0.651102	2.61267	0.521609		2.50767	0.559872	2.30367	0.958157	2.71667	0.303507	2.78667	0.323825					0.194667	-0.163829	0.843	0.461742	-0.321	-0.107587	0.129	-0.122971		-0.162	1.2427	0.275333	1.7391	-0.264333
732	737	4	5.885	1	FTQQVQ	3.23067	1.22098	2.61933	1.26458	2.376	1.15632	5.737	0.979239		2.42567	0.780389	1.07033	0.332927	3.68333	1.12227	4.82767	0.484352		3.30733	1.06581	3.14867	0.620004	3.57	0.244614	5.10967	0.572856					0.805	0.440591	1.549	0.931649	-1.30733	0.0340538	0.909333	0.494887		-0.0766667	2.28679	-0.529333	1.88458	-1.194
736	741	4	10.625	1	VQVIEM	2.05567	0.388639	2.47133	0.209087	2.759	0.0661891	4.81933	1.28029		2.65767	1.52844	3.09233	1.14308	3.29267	1.13677	4.48133	0.616078		3.88667	0.536651	3.076	1.46259	2.64567	0.762486	3.71	1.09814					-0.602	-1.1398	-0.621	-0.933994	-0.533667	-1.07058	0.338	0.664209		-1.831	0.92529	-0.604667	1.67168	0.113333
741	747	5	9.36	2	MLQKVTL	6.85633	1.12349	22.1213	1.41931	44.8993	1.08852	60.6043	0.88991		7.09867	0.805882	23.701	1.1022	43.9973	0.476194	60.459	0.255454		8.33733	0.763055	25.0457	0.349377	45.1787	1.05268	61.83	1.03815					-0.242333	0.317606	-1.57967	0.317115	0.902	0.612322	0.145333	0.634456		-1.481	1.88654	-2.92433	1.76869	-0.279333
742	747	4	8.605	1	LQKVTL	6.94433	0.311001	26.5473	1.02598	54.4227	0.441932	74.3353	0.386539		7.98333	0.704024	27.7037	0.485409	53.6693	0.748017	72.5133	0.517016		9.35633	0.864486	30.4757	1.24451	55.127	0.546234	74.5583	0.196937					-1.039	-0.393023	-1.15633	0.540571	0.753333	-0.306084	1.822	-0.130477		-2.412	1.17549	-3.92833	2.27049	-0.704333
742	782	38	12.73	5	LQKVTLDIKSLSAEKYDVSSQVISQLKQKLENLQNSQLPES	48.1627	0.0764221	62.8717	0.562637	70.944	0.152542	72.7873	0.243521		48.293	0.715243	63.3163	0.816151	70.7647	0.687101	72.1787	0.258274		49.1333	0.313809	64.7887	0.659829	70.4707	0.265161	72.322	0.126099					-0.130333	-0.638821	-0.444667	-0.253514	0.179333	-0.53456	0.608667	-0.0147531		-0.970667	0.390231	-1.917	1.22247	0.473333
748	761	12	8.325	2	DIKSLSAEKYDVSS	76.0603	0.667909	77.369	0.662415	76.9287	0.808422	76.064	0.401986		77.112	0.730236	76.5517	0.650197	76.1867	0.581667	76.3637	0.710397		76.2977	0.585943	76.3097	0.395506	76.978	0.753665	76.4917	0.624773					-1.05167	-0.0623267	0.817333	0.0122174	0.742	0.226755	-0.299667	-0.308411		-0.237333	1.25385	1.05933	1.05792	-0.0493333
748	767	18	11.355	3	DIKSLSAEKYDVSSQVISQL	77.24	0.514443	77.9907	0.361929	77.6257	0.965123	77.7283	0.384408		77.388	0.613413	77.5217	0.726684	77.3097	0.214759	77.493	0.366509		78.0443	0.653475	78.1987	0.490617	77.407	0.382713	77.3773	0.508116					-0.148	-0.09897	0.469	-0.364755	0.316	0.750364	0.235333	0.0178986		-0.804333	1.16792	-0.208	0.852546	0.218667
748	782	32	12.795	5	DIKSLSAEKYDVSSQVISQLKQKLENLQNSQLPES	55.9143	0.250887	70.755	0.738537	77.938	0.177418	78.5433	0.298205		56.3803	0.718638	71.1117	0.488444	77.8247	0.342392	77.948	0.507296		57.219	0.533262	72.4643	0.747509	77.6843	0.305012	77.8777	0.0956155					-0.466	-0.467751	-0.356667	0.250093	0.113333	-0.164974	0.595333	-0.209091		-1.30467	0.784149	-1.70933	1.48605	0.253667
755	782	25	12.4	3	EKYDVSSQVISQLKQKLENLQNSQLPES	51.9587	0.433862	70.8707	0.536105	79.9	0.397189	80.0913	0.309959		52.5543	0.992164	70.869	0.62931	79.388	0.645394	79.895	0.298531		54.044	0.973906	72.2073	0.0438786	79.2463	0.24768	79.643	0.186968					-0.595667	-0.558302	0.00166667	-0.0932052	0.512	-0.248205	0.196333	0.0114272		-2.08533	1.40777	-1.33667	0.579983	0.653667
762	767	4	9.58	1	QVISQL	81.4787	0.859186	84.9423	1.31654	84.1847	1.12284	85.1257	0.839502		81.6223	1.05757	82.929	0.950896	85.0353	0.319193	85.441	0.751547		83.853	0.286131	85.253	1.22488	83.4883	0.845415	84.5997	0.238246					-0.143667	-0.198379	2.01333	0.365639	-0.850667	0.803647	-0.315333	0.0879554		-2.37433	1.14532	-0.310667	2.54142	0.696333
762	782	18	10.765	3	QVISQLKQKLENLQNSQLPES	48.3313	0.537379	74.754	0.844377	87.4053	0.749513	86.4657	0.80697		48.534	0.553793	74.522	0.287256	86.8177	0.623186	87.232	0.751483		49.5493	1.43455	76.4143	0.183506	86.5163	0.423536	86.6317	1.03761					-0.202667	-0.0164141	0.232	0.557121	0.587667	0.126326	-0.766333	0.0554866		-1.218	1.97193	-1.66033	1.02788	0.889
767	782	13	7.775	3	LKQKLENLQNSQLPES	35.857	0.504575	60.7713	0.631117	76.7563	0.474043	76.351	0.387849		36.748	0.988528	60.7667	1.05774	75.9493	0.832148	76.6207	0.583653		36.8937	0.689992	61.9747	0.273665	76.3517	0.335245	76.2957	0.436729					-0.891	-0.483953	0.00466667	-0.426621	0.807	-0.358105	-0.269667	-0.195803		-1.03667	1.19457	-1.20333	0.904781	0.404667
768	782	12	7.415	2	KQKLENLQNSQLPES	36.7577	0.514407	60.1493	0.642839	76.6843	0.361569	77.0267	0.274899		38.208	0.981679	59.9293	0.390359	76.1847	1.28411	76.6057	0.395647		37.9613	0.850732	61.3527	0.353044	76.741	0.529351	76.9233	1.08081					-1.45033	-0.467272	0.22	0.25248	0.499667	-0.92254	0.421	-0.120748		-1.20367	1.36514	-1.20333	0.995884	-0.0566667
783	796	10	10.545	3	FRVPYDPGLKAGAL	3.13433	0.256938	5.311	0.587166	15.1653	0.601007	25.7513	0.667585		3.46533	1.11103	4.851	0.715076	15.7533	0.465451	25.767	0.139503		3.89667	0.640279	5.56167	0.412095	14.801	0.326302	25.8647	0.810988					-0.331	-0.854096	0.46	-0.127909	-0.588	0.135556	-0.0156667	0.528083		-0.762333	0.897217	-0.250667	0.999261	0.364333
789	796	6	10.505	1	PGLKAGAL	3.959	0.359817	6.56633	1.08589	17.067	1.04716	27.7097	0.54964		4.52467	1.16982	6.11733	1.0707	17.4843	0.627581	27.568	0.876659		4.967	0.272083	6.32367	0.709071	16.6907	0.154423	27.5897	0.433002					-0.565667	-0.810004	0.449	0.0151939	-0.417333	0.419576	0.141667	-0.327019		-1.008	0.631899	0.242667	1.79496	0.376333
797	801	3	4.71	1	AIEKC	33.3163	0.949981	37.005	0.461181	56.7927	0.83075	81.8027	0.693693		33.3953	0.81419	36.1093	0.685152	56.4397	0.226553	81.2667	0.88724		33.548	0.610216	37.5793	1.20604	56.62	0.241156	81.198	0.743073					-0.079	0.135791	0.895667	-0.223971	0.353	0.604197	0.536	-0.193546		-0.231667	1.5602	-0.574333	1.66722	0.172667
797	812	13	7.28	4	AIEKCKVMASKKKPLW	18.725	0.295471	23.2757	0.425865	34.687	0.556671	42.0703	0.64172		19.3603	0.465603	23.2497	0.308166	32.0467	1.0542	39.0037	0.476211		19.06	0.555789	23.7893	0.160429	34.2127	0.60738	41.8057	1.32601					-0.635333	-0.170132	0.026	0.117699	2.64033	-0.497528	3.06667	0.165508		-0.335	0.851259	-0.513667	0.586294	0.474333
797	815	16	10.75	4	AIEKCKVMASKKKPLWLEF	11.0463	0.283814	14.4507	0.430857	21.9373	0.100426	26.5573	0.0630026		11.4213	0.212578	14.426	0.106151	20.3353	0.220682	24.661	0.14471		11.809	0.403424	14.9587	0.305932	21.5563	0.356733	26.313	0.523403					-0.375	0.0712361	0.0246667	0.324706	1.602	-0.120256	1.89633	-0.0817074		-0.762667	0.687238	-0.508	0.736788	0.381
814	823	7	10.005	2	EFKCADPTAL	3.425	0.789189	5.054	0.325374	6.14967	0.414874	13.777	0.709004		3.77067	1.32593	3.92633	0.238563	6.25967	0.797917	13.2707	0.419836		3.44933	0.100729	4.915	1.15062	5.78967	0.115768	13.4643	0.604429					-0.345667	-0.536745	1.12767	0.0868106	-0.11	-0.383044	0.506333	0.289168		-0.0243333	0.889918	0.139	1.47599	0.36
816	823	5	7.305	1	KCADPTAL	21.9733	0.868153	54.3677	0.663318	74.1357	0.640809	74.7713	0.380008		24.54	0.914394	52.868	0.169576	73.336	1.49283	73.5877	0.534146		24.736	1.04857	53.785	0.811558	74.6087	0.806737	75.0627	1.25966					-2.56667	-0.0462404	1.49967	0.493742	0.799667	-0.852017	1.18367	-0.154138		-2.76267	1.91673	0.582667	1.47488	-0.473
816	829	11	8.505	2	KCADPTALSNETIG	36.0103	0.722524	54.1363	0.678207	65.449	1.29343	68.179	0.698696		36.9007	0.9736	53.4643	0.325908	64.821	1.02904	68.415	0.274814		37.5003	0.782441	54.3953	0.506463	64.6693	0.224193	68.0263	0.617817					-0.890333	-0.251076	0.672	0.352298	0.628	0.264392	-0.236	0.423881		-1.49	1.50496	-0.259	1.18467	0.779667
816	838	20	12.645	3	KCADPTALSNETIGIIFKHGDDL	10.7937	0.490959	15.616	1.23669	17.015	0.53325	25.8697	0.223151		10.608	1.33717	14.1593	0.939247	17.5427	0.261878	26.2547	0.605028		11.479	0.699498	15.4073	0.777571	18.3227	0.25115	28.1507	0.345894					0.185667	-0.846207	1.45667	0.297444	-0.527667	0.271372	-0.385	-0.381877		-0.685333	1.19046	0.208667	2.01426	-1.30767
816	842	24	12.325	3	KCADPTALSNETIGIIFKHGDDLRQDM	16.7733	0.402724	28.142	0.702496	37.4243	1.40429	41.6307	0.608896		17.1003	0.752271	27.4587	0.755354	38.235	0.0781729	40.7857	0.870715		17.453	0.481623	26.9743	0.393792	36.776	0.540453	40.4187	0.422718					-0.327	-0.349548	0.683333	-0.0528582	-0.810667	1.32612	0.845	-0.261819		-0.679667	0.884347	1.16767	1.09629	0.648333
816	843	25	12.79	4	KCADPTALSNETIGIIFKHGDDLRQDML	16.123	0.320098	26.784	0.478731	36.316	0.802304	40.548	0.468817		16.0883	0.680718	25.924	0.735901	36.663	0.296687	39.42	0.621853		16.392	0.475444	26.0633	0.441641	35.5883	0.761636	39.2097	0.0537246					0.0346667	-0.36062	0.86	-0.257171	-0.347	0.505617	1.128	-0.153036		-0.269	0.795542	0.720667	0.920371	0.727667
816	845	27	13.855	4	KCADPTALSNETIGIIFKHGDDLRQDMLIL	14.0157	0.74015	24.263	0.289563	32.488	1.1734	36.417	0.943232		14.5833	1.05764	23.8997	0.781287	32.775	1.40942	35.03	0.899404		14.5177	0.293722	23.386	1.12319	30.3697	0.829174	34.6333	0.557681					-0.567667	-0.317491	0.363333	-0.491724	-0.287	-0.236013	1.387	0.0438285		-0.502	1.03387	0.877	1.41276	2.11833
824	829	4	5.935	1	SNETIG	31.7507	1.41133	43.6257	0.209612	50.2637	0.555919	54.8317	1.14051		32.0107	1.13458	44.113	1.62724	50.5467	0.803578	53.9517	0.763679		32.427	0.377827	44.4317	0.705424	49.0877	1.52686	54.0417	0.691108					-0.26	0.276753	-0.487333	-1.41763	-0.283	-0.247658	0.88	0.376834		-0.676333	1.78916	-0.806	0.915036	1.176
843	848	4	14.255	1	LILQIL	3.552	1.10029	4.718	0.411472	4.07133	1.19249	4.02433	0.395558		4.225	0.318774	3.59533	0.47132	3.97033	0.612556	3.624	0.706406		3.63167	0.346019	3.69533	0.336456	3.37733	0.329219	3.41533	0.140593					-0.673	0.781515	1.12267	-0.059848	0.101	0.57993	0.400333	-0.310847		-0.0796667	1.44631	1.02267	0.747927	0.694
844	852	7	13.535	2	ILQILRIME	0.253	0.228164	0.556	0.510839	0.235333	0.283098	0.570667	0.407817		0.244333	0.109098	0.336	0.26712	0.365	0.0409268	0.387333	0.265527		0.243333	0.191106	0.381	0.332366	0.297333	0.227588	0.265333	0.223599					0.00866667	0.119067	0.22	0.243719	-0.129667	0.242171	0.183333	0.14229		0.00966667	0.41927	0.175	0.843204	-0.062
849	861	11	12.125	2	RIMESIWETESLD	4.39867	0.198578	8.01867	0.736273	16.0197	0.216429	25.3733	0.457718		4.017	0.121503	7.97067	0.302986	15.986	0.107177	26.9533	0.779378		4.35	0.112743	7.92367	0.0995105	15.363	0.0952943	25.9227	0.760283					0.381667	0.0770752	0.048	0.433287	0.0336667	0.109251	-1.58	-0.32166		0.0486667	0.311321	0.095	0.835783	0.656667
849	862	12	13.65	2	RIMESIWETESLDL	4.19333	0.616714	7.655	0.377583	15.46	0.198484	25.808	0.584133		4.08567	0.280083	7.20767	0.30066	14.9807	0.6555	26.8417	1.48767		4.07467	0.300161	7.366	0.199437	15.3527	0.148372	27.7617	0.258614					0.107667	0.336631	0.447333	0.0769233	0.479333	-0.457016	-1.03367	-0.903538		0.118667	0.916875	0.289	0.57702	0.107333
853	861	7	11.86	1	SIWETESLD	7.05767	0.220301	11.898	0.406966	22.5377	0.358315	35.6187	0.467351		6.997	0.390753	11.7543	0.0704367	23.516	1.18263	36.643	1.06006		7.61433	0.559014	11.8873	0.574693	23.1833	1.1224	35.8667	0.46022					0.0606667	-0.170453	0.143667	0.336529	-0.978333	-0.824319	-1.02433	-0.592708		-0.556667	0.779314	0.0106667	0.981659	-0.645667
853	862	8	13.665	1	SIWETESLDL	5.53333	0.318817	9.87833	0.405209	20.0483	1.27925	35.27	0.419358		5.437	0.675387	9.621	0.515745	20.0623	0.661447	36.025	0.472072		5.568	0.420444	9.576	0.45016	20.328	0.278437	36.6827	0.7307					0.0963333	-0.356569	0.257333	-0.110536	-0.014	0.617801	-0.755	-0.0527142		-0.0346667	0.739261	0.302333	0.855369	-0.279667
862	878	14	13.355	2	LCLLPYGCISTGDKIGM	2.83833	0.166857	5.05967	0.138349	12.5923	0.453447	24.0137	0.0269506		3.252	0.754194	4.97667	0.498399	11.837	0.422269	21.778	0.473982		3.45133	0.350386	5.74533	0.550216	14.16	0.205297	26.2317	0.491362					-0.413667	-0.587337	0.083	-0.36005	0.755333	0.0311783	2.23567	-0.447031		-0.613	0.517243	-0.685667	0.688564	-1.56767
862	880	16	13.7	3	LCLLPYGCISTGDKIGMIE	2.77767	0.428505	5.09867	1.09336	11.664	1.22277	20.9393	0.423293		2.59067	0.468726	4.596	0.52947	10.365	0.651083	18.8417	0.746887		3.68967	0.865395	5.74567	0.267958	13.122	0.332402	21.9127	0.313696					0.187	-0.0402215	0.502667	0.56389	1.299	0.571689	2.09767	-0.323594		-0.912	1.2939	-0.647	1.36132	-1.458
863	878	13	12.41	2	CLLPYGCISTGDKIGM	3.634	0.153052	5.89533	0.613063	13.695	0.0877097	24.901	0.237363		3.836	0.584533	5.69633	0.559747	13.0163	0.432321	22.6193	0.361255		4.15767	0.386316	6.72067	0.296517	15.449	0.115529	26.5747	0.321531					-0.202	-0.431481	0.199	0.0533164	0.678667	-0.344611	2.28167	-0.123893		-0.523667	0.539369	-0.825333	0.90958	-1.754
863	880	15	12.88	2	CLLPYGCISTGDKIGMIE	2.76433	0.288767	4.535	0.281267	11.0693	0.0705715	19.9677	0.161686		2.66733	0.714144	4.30633	0.30147	10.4733	0.442679	18.347	0.334797		2.812	0.276919	5.093	0.319388	12.782	0.0783135	21.6147	0.161853					0.097	-0.425378	0.228667	-0.0202035	0.596	-0.372107	1.62067	-0.173111		-0.0476667	0.565686	-0.558	0.600655	-1.71267
865	878	12	10.75	2	LPYGCISTGDKIGM	4.38667	0.0606987	7.342	1.04954	14.7987	0.414045	21.9043	0.192511		5.00967	1.05084	6.924	0.848956	14.4397	0.805119	20.7883	0.39795		5.174	0.481563	8.26267	0.804053	15.78	0.303317	23.021	0.269538					-0.623	-0.990144	0.418	0.200582	0.359	-0.391074	1.116	-0.20544		-0.787333	0.542262	-0.920667	1.85359	-0.981333
870	878	7	7.945	2	ISTGDKIGM	10.315	0.546431	12.073	0.846978	18.3537	0.5995	23.5273	0.671183		11.2233	0.995189	11.0547	0.623678	17.9357	0.469762	23.6167	0.213657		11.357	0.764151	13.0123	1.04315	19.6823	0.239659	24.6327	0.216024					-0.908333	-0.448758	1.01833	0.2233	0.418	0.129738	-0.0893333	0.457526		-1.042	1.31058	-0.939333	1.89013	-1.32867
879	887	7	7.46	1	IEIVKDATT	25.5673	0.605748	40.7943	0.524811	54.4877	0.495383	58.4947	0.293881		17.2937	1.04852	28.5477	0.58234	41.1443	1.14556	50.459	0.410004		21.8793	0.763823	36.9563	0.421551	53.2623	0.163164	58.469	0.37729					8.27367	-0.442774	12.2467	-0.0575296	13.3433	-0.650175	8.03567	-0.116122		3.688	1.36957	3.838	0.946362	1.22533
879	889	9	9.415	1	IEIVKDATTIA	21.5223	0.606709	35.4697	0.337761	46.2217	0.867809	49.878	1.17445		14.1027	1.0876	24.7803	0.858175	35.3447	0.840414	43.1453	0.56736		19.0357	0.665647	31.8953	0.524302	44.6027	0.509319	50.149	0.150053					7.41967	-0.480887	10.6893	-0.520414	10.877	0.0273945	6.73267	0.60709		2.48667	1.27236	3.57433	0.862063	1.619
879	901	21	10.325	3	IEIVKDATTIAKIQQSTVGNTGA	35.912	0.577758	42.4723	0.576216	49.914	0.0955981	57.3943	0.170195		32.854	0.586258	37.264	0.876702	43.503	0.383077	52.5343	0.400418		34.48	0.514977	41.3677	0.682063	49.1337	0.310976	57.213	0.399771					3.058	-0.00850074	5.20833	-0.300487	6.411	-0.287479	4.86	-0.230223		1.432	1.09273	1.10467	1.25828	0.780333
879	910	30	12.065	4	IEIVKDATTIAKIQQSTVGNTGAFKDEVLNHW	30.417	0.224306	39.4653	0.596342	46.1783	0.50634	54.5717	0.252496		28.9013	0.686223	35.5903	0.780248	42.8397	0.460332	50.5277	0.634264		30.7653	0.903975	38.3837	0.990462	45.8723	0.841431	55.601	0.620414					1.51567	-0.461918	3.875	-0.183905	3.33867	0.0460084	4.044	-0.381767		-0.348333	1.12828	1.08167	1.5868	0.306
881	887	5	4.135	1	IVKDATT	33.831	0.596807	47.2803	1.21936	54.7957	0.699218	61.1913	0.248242		22.005	1.02241	34.445	0.606679	45.648	0.921224	58.5363	0.406207		29.0863	0.948664	47.008	0.549533	55.718	0.880211	61.6223	0.855238					11.826	-0.4256	12.8353	0.612679	9.14767	-0.222006	2.655	-0.157965		4.74467	1.54547	0.272333	1.76889	-0.922333
888	901	12	6.475	2	IAKIQQSTVGNTGA	53.5003	0.580621	57.9407	0.581844	63.4833	0.746274	73.1667	0.588508		53.582	1.17358	56.153	0.389293	61.3247	0.967695	68.968	0.797779		53.4277	0.592558	57.597	0.408985	62.5697	0.630661	72.173	0.705441					-0.0816667	-0.59296	1.78767	0.192551	2.15867	-0.221421	4.19867	-0.209271		0.0726667	1.17318	0.343667	0.990829	0.913667
902	910	7	10.48	3	FKDEVLNHW	3.52033	0.277651	5.34767	0.802608	12.8853	0.469848	21.2203	0.167837		2.98333	0.373211	5.379	0.433914	12.4603	0.550286	20.8357	1.69424		3.57667	0.821527	5.451	0.59902	13.335	0.335608	23.3923	0.0837277					0.537	-0.0955594	-0.0313333	0.368695	0.425	-0.0804375	0.384667	-1.5264		-0.0563333	1.09918	-0.103333	1.40163	-0.449667
902	924	20	9.79	3	FKDEVLNHWLKEKSPTEEKFQAA	8.13367	0.23871	12.4623	0.0823974	18.0223	0.341657	29.3877	0.978108		8.097	0.552197	11.282	0.228105	18.1233	0.437169	28.9927	0.442848		8.474	0.151433	12.6883	0.59973	19.086	0.491692	32.1917	0.7755					0.0366667	-0.313487	1.18033	-0.145708	-0.101	-0.0955118	0.395	0.53526		-0.340333	0.390143	-0.226	0.682128	-1.06367
927	934	6	8.745	2	RFVYSCAG	2.242	0.389385	2.68767	0.367839	3.14233	0.321721	3.04733	0.457222		2.55867	0.752339	2.68067	0.373579	2.931	0.413907	2.85733	0.338468		3.218	0.508334	2.934	0.227857	3.63567	0.679312	2.67267	0.393421					-0.316667	-0.362954	0.007	-0.00574035	0.211333	-0.0921861	0.19	0.118755		-0.976	0.897719	-0.246333	0.595696	-0.493333
929	934	4	6.435	1	VYSCAG	2.27533	0.346964	3.03333	0.320737	3.16	0.649125	3.06167	0.352724		3.11133	0.928498	2.54633	0.732089	3.43667	1.00728	3.17633	0.19449		3.195	0.609103	3.14333	0.754428	3.885	0.490664	3.09667	0.360459					-0.836	-0.581533	0.487	-0.411352	-0.276667	-0.358157	-0.114667	0.158234		-0.919667	0.956068	-0.11	1.07517	-0.725
935	939	3	7.25	1	YCVAT	1.29433	0.307604	1.38367	0.119876	1.468	0.202527	1.40867	0.221365		1.12333	0.488234	1.15967	0.466186	1.31133	0.42132	1.23267	0.146466		1.22533	0.348626	1.41	0.213176	1.45667	0.137733	1.44767	0.287135					0.171	-0.18063	0.224	-0.34631	0.156667	-0.218793	0.176	0.0748986		0.069	0.656231	-0.0263333	0.333052	0.0113333
940	953	12	10.995	3	FVLGIGDRHNDNIM	1.47233	0.239149	2.44267	0.152762	6.11267	0.286744	10.687	0.0857496		1.78967	0.403986	2.21967	0.119985	6.03667	0.296456	9.96433	0.201257		2.03033	0.105557	3.087	0.350902	7.579	0.539737	10.3107	0.108307					-0.317333	-0.164836	0.223	0.0327776	0.076	-0.00971192	0.722667	-0.115507		-0.558	0.344706	-0.644333	0.503664	-1.46633
954	960	5	7.91	1	ITETGNL	7.10733	0.113778	17.9937	0.875214	27.9047	1.19367	36.703	0.444872		6.77333	1.48732	15.748	0.800625	25.8983	1.26135	35.2143	0.580095		8.33567	0.833759	17.85	0.629155	29.3677	0.666454	36.6303	0.57938					0.334	-1.37354	2.24567	0.0745891	2.00633	-0.067683	1.48867	-0.135223		-1.22833	0.947537	0.143667	1.50437	-1.463
954	961	6	11.65	1	ITETGNLF	5.178	0.355146	12.4177	0.368687	19.153	0.52971	24.0097	0.45532		5.359	1.36147	10.9103	0.69669	17.9377	1.09618	22.1073	0.596968		6.43467	0.468624	12.6267	0.541797	20.4753	0.726583	23.7003	0.424926					-0.181	-1.00632	1.50733	-0.328003	1.21533	-0.566472	1.90233	-0.141648		-1.25667	0.82377	-0.209	0.910485	-1.32233
954	975	20	13.58	2	ITETGNLFHIDFGHILGNYKSF	26.4467	0.608954	29.1033	0.258134	31.4057	0.41357	33.0713	0.732164		26.893	1.07356	29.5817	0.592598	32.0063	0.457001	32.3733	0.18876		26.5707	0.088636	28.8557	1.12379	30.4977	0.307367	31.6353	0.388271					-0.446333	-0.464605	-0.478333	-0.334464	-0.600667	-0.0434312	0.698	0.543404		-0.124	0.69759	0.247667	1.38192	0.908
954	976	21	14.11	4	ITETGNLFHIDFGHILGNYKSFL	29.9157	0.402876	32.6607	0.271717	35.0227	0.152422	36.6297	0.741763		30.775	0.518825	32.7763	0.550313	34.9333	0.497439	36.452	0.302633		30.0713	0.467906	33.299	0.609087	34.8183	0.672186	35.6513	0.327575					-0.859333	-0.115948	-0.115667	-0.278596	0.0893333	-0.345017	0.177667	0.43913		-0.155667	0.870783	-0.638333	0.880804	0.204333
954	992	35	14.24	5	ITETGNLFHIDFGHILGNYKSFLGINKERVPFVLTPDFL	25.8333	0.114019	28.679	0.398982	31.3323	0.0940443	32.002	0.624666		26.6677	0.383881	28.7707	0.489243	30.9857	0.814703	32.0713	0.846547		26.2787	0.343971	29.4133	0.509043	31.6887	0.582951	36.2307	0.774579					-0.834333	-0.269862	-0.0916667	-0.0902602	0.346667	-0.720658	-0.0693333	-0.221881		-0.445333	0.45799	-0.734333	0.908025	-0.356333
961	971	9	12.365	3	FHIDFGHILGN	31.107	0.488312	37.5553	0.171727	42.1807	0.176919	44.2447	1.12788		31.87	0.9159	37.9807	1.04879	42.107	0.161084	44.7483	1.01327		30.8987	1.26468	36.04	0.359822	39.8233	1.15933	44.047	0.466454					-0.763	-0.427588	-0.425333	-0.87706	0.0736667	0.0158352	-0.503667	0.114616		0.208333	1.75299	1.51533	0.53155	2.35733
961	972	10	13.075	3	FHIDFGHILGNY	33.7453	0.313881	38.326	0.440031	42.313	0.53336	45.269	0.196771		34.5607	0.938139	38.7187	0.56263	41.9693	0.222657	44.4947	0.705408		33.5453	0.706077	37.5613	0.235681	41.137	0.416258	43.6203	0.0349476					-0.815333	-0.624258	-0.392667	-0.122599	0.343667	0.310703	0.774333	-0.508636		0.2	1.01996	0.764667	0.675711	1.176
961	975	13	12.735	2	FHIDFGHILGNYKSF	40.103	1.3002	44.8733	0.889582	47.5753	1.31177	50.3447	0.599917		40.028	0.644099	44.928	0.282204	46.897	0.982255	49.2247	0.602083		40.2587	1.10502	44.612	0.756335	46.5393	0.33332	49.1233	0.359083					0.075	0.656099	-0.0546667	0.607378	0.678333	0.329519	1.12	-0.00216639		-0.155667	2.40521	0.261333	1.64592	1.036
961	991	27	13.915	5	FHIDFGHILGNYKSFLGINKERVPFVLTPDF	35.816	0.334112	39.461	0.464733	41.8403	0.196495	43.675	1.10178		35.9503	0.860106	39.0993	1.08796	42.2263	0.819083	43.4833	1.2385		35.8307	0.137551	40.6463	0.773791	42.2173	0.858448	48.4927	0.343961					-0.134333	-0.525994	0.361667	-0.623228	-0.386	-0.622587	0.191667	-0.136725		-0.0146667	0.471663	-1.18533	1.23852	-0.377
961	992	28	14.105	4	FHIDFGHILGNYKSFLGINKERVPFVLTPDFL	32.4447	0.220096	36.1257	0.53618	38.7233	0.0160416	39.5883	0.581318		33.291	0.277609	35.7307	0.385622	38.656	0.414754	39.6707	0.262359		32.851	0.644463	37.075	0.240493	39.0403	0.776528	44.6973	0.684726					-0.846333	-0.0575132	0.395	0.150558	0.0673333	-0.398713	-0.0823333	0.318959		-0.406333	0.86456	-0.949333	0.776674	-0.317
962	992	27	13.825	5	HIDFGHILGNYKSFLGINKERVPFVLTPDFL	34.5473	0.386567	37.3913	0.577192	40.4597	0.304175	41.5623	0.170321		35.2253	0.539374	37.3817	0.541871	40.433	0.484294	41.183	0.789151		34.901	0.242743	38.5833	0.585001	40.8733	0.240367	47.8617	0.707811					-0.678	-0.152807	0.00966667	0.0353206	0.0266667	-0.180119	0.379333	-0.61883		-0.353667	0.62931	-1.192	1.16219	-0.413667
973	992	16	13.175	4	KSFLGINKERVPFVLTPDFL	24.987	0.233726	27.5813	0.363452	30.9113	0.106162	31.7147	0.0763566		25.2957	0.2325	27.5857	0.467949	30.745	0.275174	31.2037	0.429225		26.092	0.390534	29.7797	0.318134	31.9693	0.167936	43.4537	0.860062					-0.308667	0.00122616	-0.00433333	-0.104497	0.166333	-0.169013	0.511	-0.352869		-1.105	0.624261	-2.19833	0.681586	-1.058
976	992	13	13.525	3	LGINKERVPFVLTPDFL	18.4507	0.0657292	21.542	0.408694	25.3633	0.264765	26.3233	0.0542248		18.7097	0.385791	21.541	0.32247	25.3163	0.347356	25.9477	0.559513		19.5303	0.352235	23.8407	0.375576	26.8617	0.15273	40.2643	0.375295					-0.259	-0.320061	0.001	0.0862241	0.047	-0.0825915	0.375667	-0.505288		-1.07967	0.417964	-2.29867	0.78427	-1.49833
977	991	11	12.29	3	GINKERVPFVLTPDF	17.7743	0.0705998	21.688	0.648607	26.3407	0.440914	28.574	0.0478435		17.7703	0.389135	21.1873	0.423689	26.424	0.375796	27.8357	0.198561		18.9857	0.606714	23.7233	0.254343	28.1413	0.344123	43.325	0.394022					0.004	-0.318536	0.500667	0.224918	-0.0833333	0.0651177	0.738333	-0.150717		-1.21133	0.677313	-2.03533	0.90295	-1.80067
977	992	12	13.255	3	GINKERVPFVLTPDFL	14.9443	0.105945	18.3323	0.333379	22.3637	0.00929157	23.319	0.0814678		15.0467	0.499961	18.2727	0.498066	22.2673	0.336619	22.953	0.561629		15.9727	0.124022	20.6677	0.276666	23.8267	0.119001	39.3373	0.130539					-0.102333	-0.394016	0.0596667	-0.164687	0.0963333	-0.327327	0.366	-0.480161		-1.02833	0.229966	-2.33533	0.610045	-1.463
980	992	9	13.185	3	KERVPFVLTPDFL	6.39767	0.452638	9.832	0.96389	14.4017	0.65609	15.474	1.0549		6.28233	0.693724	9.90133	0.527463	14.4977	0.0685298	15.3813	0.537529		7.62133	0.532463	12.6737	0.942562	16.7627	0.272555	33.9467	0.881708					0.115333	-0.241085	-0.0693333	0.436426	-0.096	0.58756	0.0926667	0.517374		-1.22367	0.985101	-2.84167	1.90645	-2.361
992	1014	20	10.445	4	LFVMGTSGKKTSPHFQKFQDICV	5.432	0.171607	7.258	0.486408	8.55333	0.210096	12.0703	0.220246		5.63167	0.150141	6.84467	0.134448	8.74833	0.248373	11.871	0.163331		6.09667	0.380927	7.16933	0.314594	9.973	0.138459	16.865	0.228598					-0.199667	0.0214661	0.413333	0.35196	-0.195	-0.0382774	0.199333	0.0569151		-0.664667	0.552534	0.0886667	0.801002	-1.41967
993	1014	19	9.82	2	FVMGTSGKKTSPHFQKFQDICV	6.53533	0.263572	8.45333	0.239003	10.7557	0.0798394	13.9667	0.130615		6.96267	0.274704	8.14	0.29095	10.7877	0.459913	13.745	0.251072		7.04033	0.437613	8.472	0.30264	11.899	0.159765	17.5253	0.336793					-0.427333	-0.0111318	0.313333	-0.0519474	-0.032	-0.380074	0.221667	-0.120456		-0.505	0.701185	-0.0186667	0.541643	-1.14333
1007	1014	6	10.21	2	QKFQDICV	4.52367	0.743852	4.316	0.496481	4.016	0.525311	7.28733	0.712646		4.57433	0.589598	3.685	0.386641	4.20167	0.341521	5.62967	1.23667		3.79767	0.50909	3.89067	0.246287	5.11033	0.883331	10.1683	0.690664					-0.0506667	0.154254	0.631	0.10984	-0.185667	0.183791	1.65767	-0.524019		0.726	1.25294	0.425333	0.742768	-1.09433
1015	1026	10	6.675	3	KAYLALRHHTNL	2.739	0.232517	3.40167	0.294307	5.89967	0.115544	11.1913	0.541537		2.86333	0.341769	3.07433	0.182078	5.828	0.454987	10.3487	0.256788		2.79033	0.291147	3.207	0.204443	6.07167	0.273098	10.6783	0.813462					-0.124333	-0.109253	0.327333	0.112229	0.0716667	-0.339443	0.842667	0.284749		-0.0513333	0.523663	0.194667	0.49875	-0.172
1015	1027	11	8.065	2	KAYLALRHHTNLL	2.38533	0.465155	2.44167	0.121825	5.58	0.388726	9.814	0.348431		2.49433	0.279933	2.979	0.462352	5.00433	0.0977258	9.48967	0.467263		2.224	0.400633	3.00767	0.274117	5.458	0.384079	9.58733	0.394249					-0.109	0.185222	-0.537333	-0.340527	0.575667	0.291	0.324333	-0.118832		0.161333	0.865788	-0.566	0.395942	0.122
1017	1027	9	8.585	2	YLALRHHTNLL	2.58167	0.347702	3.28167	0.566947	5.44233	0.384448	10.358	0.724331		1.953	0.131343	2.61533	0.148544	5.79767	0.209402	10.6917	0.131394		2.77567	0.569302	2.73767	0.560964	5.54033	0.23479	10.7933	0.696298					0.628667	0.216358	0.666333	0.418403	-0.355333	0.175046	-0.333667	0.592938		-0.194	0.917004	0.544	1.12791	-0.098
1019	1026	6	4.44	2	ALRHHTNL	5.41333	0.325971	6.41367	0.775888	10.7337	0.601444	18.9497	0.272157		5.925	0.687732	6.096	0.535904	10.7563	0.469055	19.962	0.270091		6.031	0.440167	6.89867	0.869539	11.3037	0.810222	19.7513	0.810806					-0.511667	-0.36176	0.317667	0.239984	-0.0226667	0.132389	-1.01233	0.00206609		-0.617667	0.766138	-0.485	1.64543	-0.57
1019	1027	7	6.655	2	ALRHHTNLL	3.257	0.105887	3.75167	0.397067	7.279	0.207053	14.796	0.301657		3.52867	0.815319	3.57967	0.231746	8.02833	0.325628	14.5147	0.365681		3.55933	0.536396	3.813	0.395812	7.801	0.080666	14.7	0.266366					-0.271667	-0.709432	0.172	0.165321	-0.749333	-0.118574	0.281333	-0.0640236		-0.302333	0.642282	-0.0613333	0.792879	-0.522
1027	1031	3	14.795	1	LIILF	1.06267	0.540204	1.331	0.159339	1.11533	0.618542	1.492	0.386249		0.922	0.498007	0.715	0.410291	1.25867	0.154727	1.92733	0.484492		1.01	0.111014	1.27933	0.487877	1.16133	0.177506	1.421	0.107392					0.140667	0.0421969	0.616	-0.250952	-0.143333	0.463815	-0.435333	-0.0982432		0.0526667	0.651217	0.0516667	0.647217	-0.046
1031	1035	3	13.855	1	FSMML	1.26	0.346484	1.47867	0.46781	2.12933	0.677072	3.65633	0.123087		1.43767	0.309041	1.633	0.201045	2.05867	0.452697	3.35967	0.198253		1.51067	0.191615	2.178	0.296223	2.26333	0.175169	5.43933	0.228828					-0.177667	0.0374428	-0.154333	0.266765	0.0706667	0.224375	0.296667	-0.0751665		-0.250667	0.538099	-0.699333	0.764033	-0.134
1035	1042	5	12.14	1	LMTGMPQL	37.6417	1.16431	53.67	1.23518	70.937	0.323353	77.6757	0.938916		37.4573	0.606276	53.1397	0.813142	71.4303	0.632657	77.7113	0.776792		39.7037	0.752828	57.7717	0.579767	75.4387	0.401369	77.8963	0.878423					0.184333	0.558031	0.530333	0.42204	-0.493333	-0.309304	-0.0356667	0.162123		-2.062	1.91713	-4.10167	1.81495	-4.50167
1035	1050	13	11.255	2	LMTGMPQLTSKEDIEY	34.0517	0.344676	45.0557	0.729116	60.4493	0.659498	68.2743	0.291037		34.6287	0.948875	44.478	0.239981	60.5623	0.592237	67.886	1.02213		36.088	0.603625	47.6473	0.757528	62.608	0.216779	67.958	0.634211					-0.577	-0.6042	0.577667	0.489135	-0.113	0.0672611	0.388333	-0.731094		-2.03633	0.948301	-2.59167	1.48664	-2.15867
1036	1042	4	11.355	1	MTGMPQL	46.9627	0.840458	65.8273	0.585329	80.6943	0.978195	80.698	1.48829		47.0027	0.73645	65.7093	1.0157	78.6377	0.961828	80.4907	0.744713		49.249	0.834897	69.7797	1.26179	78.3483	0.284678	80.366	0.658592					-0.04	0.104009	0.118	-0.430372	2.05667	0.0163678	0.207333	0.743578		-2.28633	1.67536	-3.95233	1.84712	2.346
1036	1049	11	9.835	2	MTGMPQLTSKEDIE	38.5617	0.34075	49.146	0.411144	62.8633	0.28571	68.5887	0.15901		38.835	0.745525	48.2473	0.607083	63.2227	0.616031	68.2793	0.846625		40.7313	0.444006	50.9443	1.05642	63.743	0.453435	67.6603	0.260185					-0.273333	-0.404775	0.898667	-0.195939	-0.359333	-0.330321	0.309333	-0.687615		-2.16967	0.784756	-1.79833	1.46756	-0.879667
1050	1071	20	10.12	4	YIRDALTVGKNEEDAKKYFLDQ	12.315	0.187214	14.0407	0.591325	15.595	0.188128	20.6267	0.0532572		13.0187	0.526105	13.3493	0.345585	15.5553	0.648966	20.084	0.301244		12.9923	0.506463	14.2627	0.623122	16.434	0.275412	24.525	0.361548					-0.703667	-0.338891	0.691333	0.24574	0.0396667	-0.460838	0.542667	-0.247987		-0.677333	0.693676	-0.222	1.21445	-0.839
1051	1069	17	9.84	5	IRDALTVGKNEEDAKKYFL	12.1503	0.269745	14.132	0.522015	15.16	0.327721	20.1867	0.209343		13.0723	0.936752	13.4613	0.567394	15.7063	0.48493	19.7137	0.502391		13.034	0.472952	14.2627	0.60248	16.4277	0.245376	24.826	0.404015					-0.922	-0.667007	0.670667	-0.045379	-0.546333	-0.157209	0.473	-0.293048		-0.883667	0.742697	-0.130667	1.1245	-1.26767
1051	1071	19	9.71	3	IRDALTVGKNEEDAKKYFLDQ	13.1317	0.11218	14.9067	0.28907	16.278	0.168164	19.8813	0.270504		13.6767	0.825633	14.1073	0.103355	16.1657	0.664419	19.828	0.11153		13.552	0.428963	15.095	0.71411	16.9257	0.299502	24.0907	0.466877					-0.545	-0.713453	0.799333	0.185714	0.112333	-0.496255	0.0533333	0.158974		-0.420333	0.541143	-0.188333	1.00318	-0.647667
1051	1073	21	10.73	4	IRDALTVGKNEEDAKKYFLDQIE	11.2413	0.401281	12.6303	0.270434	13.8023	0.433849	17.673	0.14894		11.4257	0.686472	12.1223	0.225434	14.302	0.534868	17.443	0.208847		11.8203	0.212608	13.166	0.523859	15.0837	0.564612	21.0457	0.485181					-0.184333	-0.285192	0.508	0.0449999	-0.499667	-0.101019	0.23	-0.0599072		-0.579	0.613889	-0.535667	0.794292	-1.28133
1072	1084	11	11.495	3	IEVCRDKGWTVQF	11.8363	0.145156	26.757	0.69047	47.5	0.424244	50.523	0.154204		11.939	0.355574	27.7393	0.387269	47.7253	0.258233	50.1737	0.569647		17.0147	0.477789	37.9083	0.290388	49.6197	0.270545	55.152	0.362931					-0.102667	-0.210418	-0.982333	0.303201	-0.225333	0.166011	0.349333	-0.415442		-5.17833	0.622945	-11.1513	0.980858	-2.11967
1074	1084	9	10.985	2	VCRDKGWTVQF	13.7213	0.602018	31.6443	0.603359	56.6297	0.838264	60.4867	0.876758		13.6567	0.4862	32.652	0.595131	56.625	0.365004	60.0073	1.09651		23.6657	8.38964	45.2817	0.200341	58.3127	0.631158	59.426	0.818362					0.0646667	0.115818	-1.00767	0.00822813	0.00466667	0.47326	0.479333	-0.219748		-9.94433	8.99166	-13.6373	0.8037	-1.683
1085	1092	6	14.52	2	NWFLHLVL	27.6253	0.771869	65.5683	0.973812	81.098	0.45016	80.7997	0.374655		28.5513	0.921239	66.5997	0.382312	80.4657	0.412361	80.8107	0.490067		31.7893	0.842672	73.4427	0.49684	80.3083	0.389672	80.8947	0.607027					-0.926	-0.14937	-1.03133	0.5915	0.632333	0.0377993	-0.011	-0.115412		-4.164	1.61454	-7.87433	1.47065	0.789667
1089	1102	12	6.13	4	HLVLGIKQGEKHSA	48.706	1.07317	55.5733	0.398097	56.326	0.658546	56.9603	0.493195		49.2163	0.76629	54.914	0.323436	55.519	0.953483	55.564	0.0858604		48.535	1.28742	55.8327	0.994489	55.39	0.537145	55.5927	1.23204					-0.510333	0.306879	0.659333	0.0746609	0.807	-0.294936	1.39633	0.407335		0.171	2.36059	-0.259333	1.39259	0.936
1091	1102	10	5.46	3	VLGIKQGEKHSA	51.946	0.919033	52.5637	1.01908	52.4747	0.945871	52.54	0.405693		52.598	1.22502	51.964	0.299321	51.884	0.82068	52.8967	1.29884		52.7653	0.960023	53.2197	1.02865	52.4783	0.557235	52.2353	0.1635					-0.652	-0.305988	0.599667	0.719758	0.590667	0.125191	-0.356667	-0.893144		-0.819333	1.87906	-0.656	2.04773	-0.00366667
1093	1102	8	3.57	1	GIKQGEKHSA	49.8743	0.624433	50.667	0.706079	50.502	0.708172	51.2437	0.706255		51.0157	0.0786914	50.4727	1.15122	50.756	1.24917	50.83	1.04364		50.8533	0.739962	50.9457	0.621564	51.588	0.553745	51.933	0.53404					-1.14133	0.545741	0.194333	-0.445141	-0.254	-0.541002	0.413667	-0.33738		-0.979	1.3644	-0.278667	1.32764	-1.086
						Average % deuterium incoporation																														% deuterium changes
p101						APO									+ IPI-549									+ Gedatolisib												APO vs IPI-549									APO vs Gedatolisib
S	E	Max D	RT	Z	Sequence	3s	SD	30s	SD	300s	SD	3000s	SD		3s	SD	30s	SD	300s	SD	3000s	SD		3s	SD	30s	SD	300s	SD	3000s	SD					3s	SD	30s	SD	300s	SD	3000s	SD		3s	SD	30s	SD	300s
11	18	6	6.485	2	DRIQHALE	49.889	1.19475	60.1183	0.422484	64.5697	0.278317	69.1463	0.662632		48.445	0.9485	58.2767	0.498911	64.745	0.734474	68.9443	0.80981		49.1787	1.66779	58.318	0.478557	65.07	1.06022	69.2747	1.30021					1.444	0.246247	1.84167	-0.0764276	-0.175333	-0.456157	0.202	-0.147178		0.710333	2.86253	1.80033	0.901041	-0.500333
11	26	14	12.395	4	DRIQHALERCLHGLSL	49.843	0.522707	59.174	1.7347	63.3223	1.62618	67.4503	0.92526		48.6277	1.04533	61.1117	0.598687	64.3533	1.35529	65.91	1.64507		50.8053	0.936888	59.4947	1.37219	63.4293	0.981458	66.8027	0.50669					1.21533	-0.52262	-1.93767	1.13602	-1.031	0.270897	1.54033	-0.719814		-0.962333	1.45959	-0.320667	3.10689	-0.107
19	26	6	9.14	2	RCLHGLSL	45.102	0.715405	50.2447	0.495678	52.0377	0.998612	51.8067	0.324811		45.6843	0.183713	49.272	0.931848	51.9793	0.877984	52.4543	0.887012		45.7333	0.686327	49.376	0.615388	51.484	0.354868	51.906	0.19639					-0.582333	0.531692	0.972667	-0.436171	0.0583333	0.120627	-0.647667	-0.562201		-0.631333	1.40173	0.868667	1.11107	0.553667
27	37	9	9.185	2	SRRSTSWSAGL	53.572	0.61409	56.9307	0.583988	58.0657	0.79295	57.1997	0.637975		53.589	1.23174	56.0887	0.480937	57.459	0.999215	57.717	0.595071		53.8677	0.613474	56.1227	0.462604	56.7543	0.0211266	56.6347	0.166314					-0.017	-0.617651	0.842	0.103051	0.606667	-0.206265	-0.517333	0.0429046		-0.295667	1.22756	0.808	1.04659	1.31133
42	47	4	13.475	1	WSLQEL	36.375	0.830573	62.2767	0.720501	73.441	0.271807	77.7087	0.50528		36.9337	0.923633	63.9243	2.01702	72.1617	0.598094	79.1617	0.956092		37.4797	0.841126	63.8163	0.37754	72.8847	0.368002	77.168	0.288749					-0.558667	-0.09306	-1.64767	-1.29651	1.27933	-0.326287	-1.453	-0.450812		-1.10467	1.6717	-1.53967	1.09804	0.556333
47	55	6	7.01	1	LVSRDPGHF	29.706	1.2923	39.7077	0.421485	45.728	1.31778	50.5007	1.16551		32.312	2.46304	39.7363	0.54511	47.9237	0.811178	51.7817	1.15899		31.8097	0.649462	39.6547	0.684146	47.3007	1.22591	49.761	0.985966					-2.606	-1.17074	-0.0286667	-0.123626	-2.19567	0.506605	-1.281	0.00651667		-2.10367	1.94176	0.053	1.10563	-1.57267
48	55	5	6.26	1	VSRDPGHF	24.0723	1.35033	34.4893	0.766238	40.207	0.864261	46.4733	0.413894		24.082	0.785124	34.1903	0.909149	39.8157	1.31839	44.856	1.03126		24.5887	1.34884	34.3343	0.641684	40.498	0.78158	44.5487	0.960527					-0.00966667	0.565206	0.299	-0.142911	0.391333	-0.45413	1.61733	-0.617368		-0.516333	2.69917	0.155	1.40792	-0.291
56	68	11	13.325	3	LILLEQILQKTRE	1.27867	0.182432	1.71533	0.263439	5.586	0.276154	21.1453	0.477779		1.13767	0.301863	1.60133	0.206699	5.51467	0.631954	20.7773	0.905555		1.13333	0.167527	1.58767	0.173615	5.74633	0.315836	20.5987	0.34541					0.141	-0.119431	0.114	0.0567408	0.0713333	-0.3558	0.368	-0.427777		0.145333	0.349959	0.127667	0.437055	-0.160333
59	68	8	7.22	3	LEQILQKTRE	2.534	0.171134	3.316	0.485427	7.48867	0.172651	25.0757	0.930093		2.68933	0.539441	2.754	0.364926	7.43267	0.796563	24.727	0.298181		2.83067	0.520079	3.352	0.35568	7.724	0.141099	24.5817	0.317406					-0.155333	-0.368306	0.562	0.120501	0.056	-0.623912	0.348667	0.631911		-0.296667	0.691214	-0.036	0.841106	-0.235333
59	78	18	10.475	2	LEQILQKTREVQEKGTYDLL	8.14533	1.17586	18.4637	0.135913	32.1363	0.363792	45.6457	0.81698		8.23767	1.32086	17.9303	0.231241	32.333	0.394095	44.96	1.41107		8.29667	0.752637	18.2923	0.492562	31.9573	0.277002	44.9027	0.63693					-0.0923333	-0.144997	0.533333	-0.0953279	-0.196667	-0.0303036	0.685667	-0.594093		-0.151333	1.9285	0.171333	0.628475	0.179
59	83	22	12.67	4	LEQILQKTREVQEKGTYDLLAPLAL	7.31467	0.216343	17.2273	0.470313	30.83	0.528504	44.1117	0.237271		7.61867	0.461244	16.756	0.156176	30.694	0.442976	43.2533	1.2578		7.69233	0.319005	17.622	0.411319	30.377	0.379311	43.2103	0.541983					-0.304	-0.244901	0.471333	0.314137	0.136	0.0855273	0.858333	-1.02053		-0.377667	0.535348	-0.394667	0.881632	0.453
59	84	23	13.95	4	LEQILQKTREVQEKGTYDLLAPLALL	6.32567	0.18166	16.358	0.279662	30.0157	0.334313	43.3307	0.918485		6.70933	0.289973	15.9987	0.229698	29.935	0.828799	43.5187	1.75744		6.78767	0.510005	16.6077	0.415352	30.129	0.716528	42.6987	0.825795					-0.383667	-0.108313	0.359333	0.0499639	0.0806667	-0.494485	-0.188	-0.838958		-0.462	0.691665	-0.249667	0.695014	-0.113333
69	78	8	10.615	1	VQEKGTYDLL	14.6763	1.536	34.5037	0.637696	53.0413	1.5028	59.2717	0.520254		16.0347	0.547997	33.134	1.0054	52.606	1.59914	58.5123	1.19834		16.3663	1.18328	34.636	1.51454	52.4603	0.438408	57.824	0.782431					-1.35833	0.987999	1.36967	-0.3677	0.435333	-0.096343	0.759333	-0.678082		-1.69	2.71928	-0.132333	2.15224	0.581
69	83	12	13.7	2	VQEKGTYDLLAPLAL	9.378	0.384626	20.1273	0.3065	32.6127	0.579246	39.7703	0.365935		9.48733	1.07963	19.5127	0.770715	32.5047	0.38912	39.9277	0.0875005		9.24767	0.767609	20.0793	0.310616	32.3637	0.51179	39.8137	0.260108					-0.109333	-0.695008	0.614667	-0.464215	0.108	0.190126	-0.157333	0.278434		0.130333	1.15224	0.048	0.617116	0.249
69	84	13	14.43	2	VQEKGTYDLLAPLALL	7.00033	0.370472	15.959	0.0504777	26.3567	0.141384	33.677	0.737038		7.20733	0.195595	15.633	0.280364	26.5133	0.230122	34.0237	0.349763		7.548	0.194433	16.2007	0.322708	26.555	0.319301	33.9997	0.220985					-0.207	0.174877	0.326	-0.229886	-0.156667	-0.0887388	-0.346667	0.387275		-0.547667	0.564904	-0.241667	0.373186	-0.198333
84	90	5	13.305	1	LFYSTVL	1.97033	0.234003	1.63267	0.235848	2.14367	0.539359	2.46967	1.16882		1.81667	0.404437	1.721	0.244354	2.09867	0.448748	2.093	0.471501		2.26033	0.0848842	1.92167	0.216033	2.45767	0.500358	2.405	0.239539					0.153667	-0.170434	-0.0883333	-0.00850614	0.045	0.0906117	0.376667	0.697324		-0.29	0.318887	-0.289	0.451881	-0.314
85	90	4	11.64	1	FYSTVL	1.648	0.370814	3.11033	0.805462	3.382	0.506012	3.74533	0.11537		2.4	0.464262	2.335	0.404826	3.12933	0.335197	3.276	0.394103		2.53067	0.681832	2.68633	0.672502	3.57067	0.221748	3.59367	0.460766					-0.752	-0.0934478	0.775333	0.400636	0.252667	0.170814	0.469333	-0.278732		-0.882667	1.05265	0.424	1.47796	-0.188667
91	101	6	9.98	2	CTPHFPPDSDL	21.465	0.339192	35.567	1.28296	45.823	0.172601	49.8583	0.44018		22.1593	0.680134	34.6263	0.228843	45.564	1.26481	49.3403	0.515967		22.1587	0.575014	35.7167	0.771701	45.6217	0.227496	49.724	0.090813					-0.694333	-0.340942	0.940667	1.05412	0.259	-1.0922	0.518	-0.0757875		-0.693667	0.914206	-0.149667	2.05467	0.201333
91	102	7	11.28	2	CTPHFPPDSDLL	16.4047	0.264205	31.3153	1.04353	46.3533	0.404767	50.2687	0.0638931		16.876	0.340124	31.4073	0.416569	46.4073	0.745733	50.1443	0.777209		17.508	0.426838	32.1143	0.438417	46.9657	0.179901	49.9523	0.165385					-0.471333	-0.0759184	-0.092	0.626962	-0.054	-0.340966	0.124333	-0.713316		-1.10333	0.691043	-0.799	1.48195	-0.612333
91	103	8	12.46	2	CTPHFPPDSDLLL	14.3813	0.0678405	26.196	0.853563	41.226	1.7223	47.2277	0.112647		14.5383	0.716457	26.7867	0.618519	39.9273	0.204158	47.7957	1.13395		14.6163	0.485928	26.7727	0.741245	39.5023	0.0435469	48.4193	0.0784878					-0.157	-0.648616	-0.590667	0.235043	1.29867	1.51815	-0.568	-1.0213		-0.235	0.553769	-0.576667	1.59481	1.72367
124	128	3	8.525	1	QELLT	11.6353	0.765277	27.8087	1.06721	35.279	1.3256	42.6157	0.279221		10.5107	0.123196	30.529	1.2418	33.6173	0.384908	43.6263	0.699183		11.314	0.604952	28.6263	0.460274	35.0847	2.67254	44.0383	0.390683					1.12467	0.642081	-2.72033	-0.174586	1.66167	0.940696	-1.01067	-0.419962		0.321333	1.37023	-0.817667	1.52749	0.194333
127	132	4	11.67	1	LTFIDA	2.55033	0.931072	3.488	0.781524	5.93267	0.433406	17.1747	0.22436		2.78333	1.15115	3.336	0.386667	6.022	0.15347	18.0463	0.507102		3.38867	0.74361	3.49433	0.463666	6.36233	0.711549	18.1617	0.0845005					-0.233	-0.220082	0.152	0.394857	-0.0893333	0.279936	-0.871667	-0.282742		-0.838333	1.67468	-0.00633333	1.24519	-0.429667
129	164	33	10.705	5	FIDAELKAPGISYQRLVRAEQGLSTRSHRSSTVTVL	4.77933	0.173368	5.67067	0.732179	7.004	0.0998749	9.845	0.119862		4.62567	0.169512	5.36867	0.676308	6.54333	0.146998	9.686	0.0885381		5.00633	0.141001	5.41933	0.915118	6.641	0.214175	9.89833	0.213903					0.153667	0.00385558	0.302	0.0558713	0.460667	-0.0471228	0.159	0.0313243		-0.227	0.314369	0.251333	1.6473	0.363
134	144	8	9.03	3	LKAPGISYQRL	3.76167	0.156845	4.43533	0.42479	4.51933	0.418622	5.643	0.409051		4.47567	0.320244	3.75533	0.648502	4.488	1.01486	5.25267	0.457111		4.24767	0.062963	4.61867	0.122231	5.01067	0.158538	5.62667	0.162439					-0.714	-0.163399	0.68	-0.223712	0.0313333	-0.596236	0.390333	-0.0480595		-0.486	0.219808	-0.183333	0.54702	-0.491333
145	162	16	4.615	4	VRAEQGLSTRSHRSSTVT	16.2917	0.486093	17.5253	1.24774	20.237	1.18521	26.642	0.927713		15.9423	0.952358	17.5893	1.00092	20.1797	1.07265	26.4727	0.510277		16.7947	1.21305	19.7547	0.714455	20.2097	0.675496	26.8817	0.64524					0.349333	-0.466265	-0.064	0.246813	0.0573333	0.112564	0.169333	0.417437		-0.503	1.69914	-2.22933	1.96219	0.0273333
145	164	18	7.035	2	VRAEQGLSTRSHRSSTVTVL	9.50833	0.407559	10.6203	0.559823	12.4333	0.396366	18.324	0.780777		9.639	0.792733	10.3083	0.768873	12.072	0.70419	18.2293	0.850449		9.321	0.635899	10.3707	0.426545	12.3533	0.371258	18.1747	0.677063					-0.130667	-0.385174	0.312	-0.20905	0.361333	-0.307823	0.0946667	-0.0696723		0.187333	1.04346	0.249667	0.986368	0.08
165	172	5	9.565	1	LLNPVEVQ	37.102	1.11318	75.656	0.554555	83.6617	0.698124	84.095	0.823533		37.9143	1.52579	75.3803	0.776026	82.8173	1.03001	83.8647	0.9163		39.215	1.04471	76.0327	0.526982	83.871	0.621723	83.9633	0.763795					-0.812333	-0.412608	0.275667	-0.221471	0.844333	-0.331883	0.230333	-0.0927671		-2.113	2.1579	-0.376667	1.08154	-0.209333
165	175	8	12.68	1	LLNPVEVQAEF	43.9507	0.788034	73.6087	0.302002	83.6097	0.367119	83.9357	0.507435		45.0517	0.434369	73.9547	0.476463	82.9503	1.04936	84.5853	0.276704		44.882	0.92578	74.3967	1.07251	82.595	0.440678	84.373	0.190693					-1.101	0.353665	-0.346	-0.174461	0.659333	-0.682243	-0.649667	0.230731		-0.931333	1.71381	-0.788	1.37452	1.01467
171	175	3	9.3	1	VQAEF	57.4677	0.46525	70.0983	0.334835	79.0323	1.18059	81.6393	0.667545		58.512	0.718357	69.175	0.929518	79.774	0.889762	82.6757	0.455987		57.412	0.242835	70.0873	0.749636	78.872	0.582899	82.0913	0.923916					-1.04433	-0.253107	0.923333	-0.594683	-0.741667	0.290823	-1.03633	0.211558		0.0556667	0.708085	0.011	1.08447	0.160333
176	193	13	8.67	2	LDVADKLSTPGPSPHSAY	24.366	0.343214	35.5313	0.627577	50.538	0.616289	62.5987	0.295896		24.232	0.761831	34.895	1.00336	50.307	1.13502	62.7	0.293169		23.6707	0.820003	35.788	0.240033	50.039	0.181868	62.6943	0.185562					0.134	-0.418617	0.636333	-0.375788	0.231	-0.518732	-0.101333	0.00272692		0.695333	1.16322	-0.256667	0.86761	0.499
177	193	12	7.9	3	DVADKLSTPGPSPHSAY	26.3897	0.189374	40.3397	0.26701	56.3183	0.232184	66.972	0.611787		26.3573	1.76445	39.899	0.494127	56.1703	0.722431	66.9767	0.755413		27.3373	0.807154	40.396	0.308597	56.087	0.510003	67.325	0.457108					0.0323333	-1.57508	0.440667	-0.227117	0.148	-0.490247	-0.00466667	-0.143627		-0.947667	0.996527	-0.0563333	0.575607	0.231333
194	198	3	13.86	1	ITLLL	1.58667	0.28816	1.94567	0.158595	2.26433	0.359535	2.533	0.477073		1.90233	0.512879	1.39567	0.394494	2.11167	0.360978	2.20967	0.118069		2.01033	0.261806	2.038	0.36876	2.06233	0.169827	2.44033	0.0804322					-0.315667	-0.224719	0.55	-0.235899	0.152667	-0.00144342	0.323333	0.359004		-0.423667	0.549966	-0.0923333	0.527355	0.202
197	209	11	10.77	3	LLHAFQATFGAHC	11.2573	0.486673	12.925	0.194856	15.185	1.00925	16.3127	1.30368		11.4413	0.556396	12.5727	0.180926	15.0687	0.857998	17.1867	0.43668		11.2433	0.335168	12.9637	0.244074	15.4083	0.443722	16.8857	0.766377					-0.184	-0.0697231	0.352333	0.01393	0.116333	0.151254	-0.874	0.866997		0.014	0.82184	-0.0386667	0.438931	-0.223333
215	226	10	7	4	HRRLQSKTLAEL	19.389	0.201789	23.373	0.418458	31.6697	1.7622	42.9227	1.00884		19.9877	0.675024	23.204	0.429716	31.3497	0.687104	43.226	0.942059		19.576	0.476273	23.6533	0.673562	31.3957	0.780003	42.9183	1.26706					-0.598667	-0.473234	0.169	-0.0112583	0.32	1.0751	-0.303333	0.0667826		-0.187	0.678063	-0.280333	1.09202	0.274
230	235	4	6.205	1	FTETAE	3.37467	0.527289	4.56267	0.180045	4.357	0.246493	5.67133	0.381326		5.15867	0.500584	4.76867	0.513952	4.55033	0.622666	5.643	0.032187		4.563	0.165312	4.79467	0.373654	4.83133	0.167097	5.37533	0.544715					-1.784	0.0267047	-0.206	-0.333906	-0.193333	-0.376172	0.0283333	0.349139		-1.18833	0.6926	-0.232	0.553699	-0.474333
231	238	6	4.54	1	TETAEAQE	3.56367	0.909876	4.523	1.00803	4.61333	1.13477	5.46733	1.12549		3.14167	0.816966	4.21633	2.05145	4.49867	1.3566	5.73	0.87817		3.95567	0.295199	4.593	1.01995	4.17167	0.316677	4.589	0.335826					0.422	0.0929101	0.306667	-1.04342	0.114667	-0.221827	-0.262667	0.247316		-0.392	1.20507	-0.07	2.02798	0.441667
239	248	8	7.635	1	LASGIGDAAE	30.7473	0.722935	40.2183	0.490878	53.0483	1.10461	63.769	0.481		31.0487	1.67968	39.438	0.818766	53.7437	1.25342	64.68	0.993361		30.722	1.04411	40.2387	0.440747	53.1093	0.943001	62.4293	1.04834					-0.301333	-0.956749	0.780333	-0.327887	-0.695333	-0.148809	-0.911	-0.512361		0.0253333	1.76704	-0.0203333	0.931626	-0.061
239	257	17	11.265	3	LASGIGDAAEARQWLRTKL	11.9983	0.259045	17.6873	0.400737	28.8613	0.214078	46.1007	1.18167		11.68	0.121503	17.415	0.144056	29.2177	0.270615	45.3077	1.24445		12.42	0.389478	18.0553	0.40665	29.3807	0.283348	46.031	0.493863					0.318333	0.137542	0.272333	0.256682	-0.356333	-0.0565369	0.793	-0.0627791		-0.421667	0.648523	-0.368	0.807387	-0.519333
240	257	16	11.055	3	ASGIGDAAEARQWLRTKL	13.1357	0.675326	18.682	0.212544	29.9777	1.10457	47.3197	0.212279		13.5943	0.693679	18.3473	0.396103	30.4083	0.323302	47.5797	0.516024		14.446	0.533742	18.361	0.589577	30.4713	0.306141	46.646	1.04752					-0.458667	-0.0183527	0.334667	-0.183559	-0.430667	0.78127	-0.26	-0.303745		-1.31033	1.20907	0.321	0.802121	-0.493667
249	257	7	8.575	3	ARQWLRTKL	1.42433	0.0425245	2.182	0.0774855	6.517	0.368973	19.6683	0.278067		1.75567	0.349636	1.96033	0.0320052	6.21867	0.498358	19.503	0.515608		1.73433	0.0396274	2.18633	0.380566	6.56933	0.124102	19.5127	0.0435928					-0.331333	-0.307111	0.221667	0.0454803	0.298333	-0.129385	0.165333	-0.237541		-0.31	0.0821519	-0.00433333	0.458051	-0.0523333
252	257	4	8.785	2	WLRTKL	1.77433	0.133425	2.39267	0.253016	3.98433	0.283151	15.3877	0.65906		1.967	0.609161	1.91233	0.387281	4.39167	0.444592	15.42	0.338353		1.99633	0.369434	2.21333	0.648216	4.469	0.140129	15.2837	0.509891					-0.192667	-0.475736	0.480333	-0.134264	-0.407333	-0.161442	-0.0323333	0.320707		-0.222	0.502859	0.179333	0.901233	-0.484667
258	270	10	10.825	2	QAVGEKAGFPGVL	17.3857	0.654653	34.885	0.622711	49.0737	0.157494	58.9783	0.396067		17.6997	1.11344	34.2717	0.814331	49.1063	0.852516	58.807	0.465588		17.9663	1.07401	35.476	0.650145	49.3297	0.179937	60.4277	0.79931					-0.314	-0.458787	0.613333	-0.19162	-0.0326667	-0.695023	0.171333	-0.0695205		-0.580667	1.72867	-0.591	1.27286	-0.256
271	288	13	8.415	2	DTAKPGKLRTIPIPVARC	36.5223	0.575232	53.6543	0.504736	63.2507	0.517969	68.8333	0.510424		36.9377	0.771571	52.9047	0.570239	62.947	0.872813	68.8833	0.591098		36.9127	0.821164	53.5117	0.670597	62.9357	0.30066	69.0697	0.440797					-0.415333	-0.196338	0.749667	-0.0655029	0.303667	-0.354844	-0.05	-0.0806739		-0.390333	1.3964	0.142667	1.17533	0.315
279	288	6	8.135	2	RTIPIPVARC	19.9883	1.12238	49.9403	0.784879	66.3523	0.208423	74.6697	0.104978		20.3273	1.07387	49.6613	0.351793	66.4277	1.35361	74.7603	0.273864		20.635	1.01504	50.1	0.502146	66.1	0.329114	74.6887	0.369462					-0.339	0.0485104	0.279	0.433086	-0.0753333	-1.14519	-0.0906667	-0.168886		-0.646667	2.13742	-0.159667	1.28702	0.252333
289	298	8	12.56	1	YTYSWNQDSF	49.4563	0.330191	53.7483	0.475864	60.2293	0.262816	62.924	0.290129		49.647	0.517205	53.266	0.279	60.44	0.471424	62.3473	0.732271		49.7967	0.84998	53.968	0.76865	60.1727	0.179023	62.2333	0.232906					-0.190667	-0.187014	0.482333	0.196864	-0.210667	-0.208608	0.576667	-0.442141		-0.340333	1.18017	-0.219667	1.24451	0.0566667
291	298	6	12.075	1	YSWNQDSF	56.273	0.44903	60.748	0.61181	68.0777	0.672502	69.9153	0.468349		56.806	0.729625	60.5077	0.591291	68.1987	0.389071	69.5387	0.719229		57.041	0.577665	61.1593	0.489625	68.0567	0.376444	69.5763	0.110699					-0.533	-0.280595	0.240333	0.0205184	-0.121	0.28343	0.376667	-0.25088		-0.768	1.0267	-0.411333	1.10143	0.021
304	317	11	12.65	2	ILLKEQELLQPEIL	53.0197	0.695799	70.8537	0.425977	75.061	0.695893	75.7883	0.308612		53.575	1.53517	70.678	0.525706	75.256	0.339771	75.4447	0.40015		53.4717	0.931087	71.5663	0.582538	75.2847	0.109646	75.5253	0.291774					-0.555333	-0.839373	0.175667	-0.0997293	-0.195	0.356122	0.343667	-0.0915384		-0.452	1.62689	-0.712667	1.00851	-0.223667
304	319	13	12.11	2	ILLKEQELLQPEILDD	48.3273	1.48496	62.976	0.652733	67.5847	0.379621	67.333	0.611088		47.2443	0.531186	63.4783	0.426022	67.4093	0.113006	67.6753	0.712572		48.2707	1.64105	63.8217	1.00517	66.9597	1.33596	67.4803	0.42562					1.083	0.953777	-0.502333	0.226712	0.175333	0.266615	-0.342333	-0.101483		0.0566667	3.12601	-0.845667	1.6579	0.625
306	317	9	11.945	2	LKEQELLQPEIL	59.6853	0.654964	75.261	0.183475	75.366	0.585854	75.6917	0.284326		60.0073	1.10526	75.0187	0.558104	75.677	0.145255	75.436	0.381535		60.5303	0.994711	75.7217	0.751481	75.51	0.276718	75.4473	0.388558					-0.322	-0.450297	0.242333	-0.374629	-0.311	0.440599	0.255667	-0.097209		-0.845	1.64967	-0.460667	0.934956	-0.144
306	321	13	11.445	2	LKEQELLQPEILDDEE	46.039	1.52042	57.167	1.43956	57.55	0.993495	59.1977	0.64769		46.298	0.48385	56.0793	0.873281	57.5167	0.272331	58.575	0.273137		47.3647	1.08159	55.531	1.70077	57.2497	0.633999	58.4977	1.52043					-0.259	1.03657	1.08767	0.566277	0.0333333	0.721164	0.622667	0.374553		-1.32567	2.60201	1.636	3.14033	0.300333
307	317	8	11.44	2	KEQELLQPEIL	59.8337	0.522228	74.0163	0.479296	73.8363	0.682485	73.7257	0.400088		61.4577	0.768495	73.3797	0.670746	73.7107	0.488682	73.854	0.897089		60.4863	0.914582	74.4067	0.498001	73.7437	0.602799	73.5527	0.717931					-1.624	-0.246267	0.636667	-0.19145	0.125667	0.193803	-0.128333	-0.497001		-0.652667	1.43681	-0.390333	0.977297	0.0926667
309	317	6	12.645	1	QELLQPEIL	60.019	0.241907	71.0533	0.803058	71.021	0.725684	71.403	0.559988		59.985	0.613342	70.4107	1.04078	70.7357	1.41255	71.608	0.559074		59.403	0.839843	70.4293	0.467103	71.1973	0.325488	70.6167	0.330051					0.034	-0.371435	0.642667	-0.237718	0.285333	-0.686869	-0.205	0.000914158		0.616	1.08175	0.624	1.27016	-0.176333
311	317	4	12.14	1	LLQPEIL	75.9877	0.449095	81.0447	0.599495	80.872	0.718169	80.3533	0.704813		76.722	1.55094	80.4293	0.745131	80.641	0.505896	80.5737	0.712513		76.8453	1.17153	81.3947	0.421013	80.905	0.315596	80.4507	0.276326					-0.734333	-1.10185	0.615333	-0.145636	0.231	0.212273	-0.220333	-0.00769971		-0.857667	1.62062	-0.35	1.02051	-0.033
327	332	4	8.235	1	DEEEDL	54.9073	1.2489	55.9417	0.208692	58.023	0.752349	56.4263	0.746111		55.919	1.85285	56.4827	0.501109	56.8467	1.19913	55.8863	0.732485		54.433	0.44544	56.1917	0.640096	56.725	0.158981	56.212	1.11753					-1.01167	-0.603947	-0.541	-0.292417	1.17633	-0.446779	0.54	0.0136264		0.474333	1.69434	-0.25	0.848788	1.298
328	332	3	7.615	1	EEEDL	49.7623	0.734514	51.9927	0.651032	52.156	0.213642	51.3663	0.342223		51.4027	0.805249	50.6447	0.726205	52.1147	0.642249	51.3293	0.350442		49.8217	1.23809	51.2417	0.268154	52.199	0.947136	51.8193	0.516357					-1.64033	-0.0707356	1.348	-0.0751737	0.0413333	-0.428607	0.037	-0.00821899		-0.0593333	1.9726	0.751	0.919185	-0.043
333	345	11	7.78	2	DADGHCAERDSVL	44.669	0.138264	45.4597	0.179581	45.9367	0.246232	45.1827	0.341562		45.6107	0.911326	44.7457	0.3205	45.2227	0.957172	45.0673	0.26075		44.7613	0.8952	45.1093	0.175249	45.9327	0.516829	45.3237	0.900657					-0.941667	-0.773061	0.714	-0.140919	0.714	-0.710939	0.115333	0.080812		-0.0923333	1.03346	0.350333	0.35483	0.004
346	356	9	3.85	2	STGSAASHAST	66.419	0.843106	66.3863	1.05279	66.745	0.861581	66.4697	0.470319		66.6967	0.77891	66.9537	0.873532	66.246	0.470315	66.7237	0.992232		66.5517	0.578938	67.8047	1.10344	65.0497	0.642578	66.5947	0.314416					-0.277667	0.0641959	-0.567333	0.179254	0.499	0.391266	-0.254	-0.521913		-0.132667	1.42204	-1.41833	2.15622	1.69533
346	359	12	9.095	2	STGSAASHASTLSL	58.5183	0.509789	59.2393	0.628424	59.4377	0.752751	58.742	0.109531		59.9493	0.701899	58.6973	0.454917	59.1523	1.3086	58.9033	0.252603		58.949	0.216917	58.7487	0.458721	58.7623	0.223889	58.9337	0.528583					-1.431	-0.192111	0.542	0.173507	0.285333	-0.55585	-0.161333	-0.143072		-0.430667	0.726706	0.490667	1.08715	0.675333
346	377	29	12.115	3	STGSAASHASTLSLASSQASGPTLSRQLLTSF	56.2427	0.693202	56.3097	0.407409	56.9343	0.806393	56.6513	0.423658		56.6463	0.372897	56.1937	0.41227	56.717	0.679974	56.4507	0.218882		56.378	0.758702	56.5617	0.518274	56.594	0.497605	56.8343	0.551322					-0.403667	0.320305	0.116	-0.00486044	0.217333	0.12642	0.200667	0.204776		-0.135333	1.4519	-0.252	0.925684	0.340333
358	374	14	10.5	2	SLASSQASGPTLSRQLL	72.362	1.15368	72.6347	0.89774	72.44	0.360609	72.7593	0.252298		72.7743	0.227863	72.829	0.288168	72.171	0.834166	72.546	0.3667		72.649	0.734958	73.447	0.442379	72.7937	0.173754	71.853	0.698077					-0.412333	0.925815	-0.194333	0.609572	0.269	-0.473557	0.213333	-0.114402		-0.287	1.88864	-0.812333	1.34012	-0.353667
360	369	7	8.085	1	ASSQASGPTL	73.9693	0.513616	74.925	0.384673	77.4057	0.149874	78.0347	0.22318		74.493	1.5329	74.121	0.566315	76.866	1.14378	78.1907	0.466605		74.1507	0.899654	74.973	0.805265	77.256	0.500021	77.6063	1.17106					-0.523667	-1.01929	0.804	-0.181643	0.539667	-0.993904	-0.156	-0.243425		-0.181333	1.41327	-0.048	1.18994	0.149667
360	374	12	10.1	2	ASSQASGPTLSRQLL	70.759	0.759624	71.7247	0.928769	71.426	0.263369	70.944	0.737273		71.3073	1.03093	71.2827	0.141924	71.4197	0.925963	71.15	0.581188		71.0037	0.641446	71.523	0.888217	71.2677	0.131462	71.3523	0.402454					-0.548333	-0.27131	0.442	0.786846	0.00633333	-0.662595	-0.206	0.156085		-0.244667	1.40107	0.201667	1.81699	0.158333
360	377	15	12.235	2	ASSQASGPTLSRQLLTSF	64.9397	0.805587	64.861	0.482497	65.5293	0.35103	66.1387	0.166554		65.1313	0.530575	65.52	0.120785	65.5123	0.286744	65.9597	0.496211		65.1513	0.849502	65.7303	1.07002	65.407	0.230469	65.7323	0.188027					-0.191667	0.275011	-0.659	0.361712	0.017	0.064286	0.179	-0.329657		-0.211667	1.65509	-0.869333	1.55252	0.122333
370	377	6	10.825	1	SRQLLTSF	79.9267	1.09869	80.232	0.448679	79.9307	0.219446	80.2657	0.635969		79.8133	1.67767	79.7187	0.546959	79.7097	0.897399	79.9243	1.21792		80.0417	0.28695	81.0983	0.799885	79.553	0.421157	80.124	0.111772					0.113333	-0.578983	0.513333	-0.09828	0.221	-0.677953	0.341333	-0.581955		-0.115	1.38564	-0.866333	1.24856	0.377667
377	392	14	11.145	1	FVSGLSDGVDSGYMED	57.164	0.769597	57.736	0.804814	58.1403	0.420341	57.855	0.401882		57.7777	0.390695	57.4167	0.614293	57.3677	0.335674	57.7047	0.830506		58.1237	0.429949	57.8737	0.68593	58.3703	0.638906	57.9183	0.279924					-0.613667	0.378902	0.319333	0.19052	0.772667	0.0846663	0.150333	-0.428624		-0.959667	1.19955	-0.137667	1.49074	-0.23
378	392	13	10.06	1	VSGLSDGVDSGYMED	53.333	0.665086	54.1257	0.752281	53.876	0.219228	53.0997	0.188617		54.1137	0.207967	53.5417	0.197955	53.512	0.845543	53.4503	0.493954		53.5907	0.371066	53.4337	0.671933	53.552	0.30837	53.2733	0.358534					-0.780667	0.457119	0.584	0.554325	0.364	-0.626315	-0.350667	-0.305337		-0.257667	1.03615	0.692	1.42421	0.324
393	397	3	4.97	1	IEESA	71.1963	1.19568	71.4073	0.505927	71.436	1.18498	71.3763	0.388577		71.825	0.984587	71.257	0.40271	71.1957	0.230357	72.12	0.840918		71.715	1.09739	72.0923	0.396159	70.3303	0.506977	71.5477	0.458495					-0.628667	0.211089	0.150333	0.103218	0.240333	0.954627	-0.743667	-0.452341		-0.518667	2.29307	-0.685	0.902087	1.10567
426	432	5	6.165	1	FKSTSQM	69.978	0.432032	70.7053	0.296301	71.1987	0.78315	72.4253	0.23414		70.4833	0.695029	70.0777	0.387991	70.129	0.973464	71.471	1.06692		69.318	0.929479	70.697	0.298819	70.8203	0.862508	70.8447	0.908878					-0.505333	-0.262997	0.627667	-0.0916903	1.06967	-0.190314	0.954333	-0.832785		0.66	1.36151	0.00833333	0.59512	0.378333
433	457	20	7.275	4	VLRRDSRSLEGSPDSGPPLRRAGSL	57.1473	0.394678	57.9	0.160599	57.627	0.32368	57.7693	0.990715		58.2947	0.870262	57.2193	0.445143	57.4537	1.43528	57.0077	0.654217		56.942	0.814694	57.1357	0.33547	58.064	0.937576	57.7117	1.23855					-1.14733	-0.475585	0.680667	-0.284544	0.173333	-1.1116	0.761667	0.336498		0.205333	1.20937	0.764333	0.496069	-0.437
435	457	18	6.99	5	RRDSRSLEGSPDSGPPLRRAGSL	57.8883	0.328002	58.4007	0.483233	58.6547	0.639181	58.9113	0.613353		58.8017	0.950238	57.955	0.322228	58.2067	1.37825	58.1187	0.339295		57.6243	0.906002	57.8903	0.377511	58.6373	1.03259	59.1553	0.203136					-0.913333	-0.622236	0.445667	0.161005	0.448	-0.739064	0.792667	0.274057		0.264	1.234	0.510333	0.860744	0.0173333
491	515	20	7.175	5	LAPASRHQRRRPFLSGDEDPKASTL	31.9627	0.696246	33.6683	0.758041	34.8547	0.915235	37.1127	0.623482		32.7823	0.736505	33.021	0.682517	34.3783	1.50402	36.381	0.846678		32.205	0.624995	32.7993	0.384204	35.0883	1.10233	38.039	0.269212					-0.819667	-0.0402596	0.647333	0.0755244	0.476333	-0.588784	0.731667	-0.223195		-0.242333	1.32124	0.869	1.14224	-0.233667
507	515	6	6.71	1	DEDPKASTL	42.014	1.79834	44.246	1.02732	46.567	1.23675	53.475	0.708733		42.3157	1.551	44.678	0.394209	45.7713	0.826948	53.6833	0.914499		42.6073	0.4857	44.0477	1.02061	46.873	0.937116	53.914	1.24409					-0.301667	0.247339	-0.432	0.633107	0.795667	0.409805	-0.208333	-0.205766		-0.593333	2.28404	0.198333	2.04793	-0.306
537	546	7	7.255	3	RRLENNRPLL	31.6523	1.00111	56.9813	0.791165	65.8617	0.34238	66.424	0.537118		32.1157	1.14667	56.1263	0.574765	65.4077	1.65995	65.9477	0.345856		31.596	1.70928	56.3347	0.437379	65.6493	0.772677	66.4117	1.27369					-0.463333	-0.145555	0.855	0.2164	0.454	-1.31757	0.476333	0.191262		0.0563333	2.7104	0.646667	1.22854	0.212333
537	549	10	8.68	4	RRLENNRPLLTRF	24.057	0.465058	50.5703	0.324864	62.4067	0.1738	62.3963	0.367277		24.8467	1.18409	49.3787	0.156845	61.3707	1.08144	62.4237	0.254881		24.0733	0.827169	48.8823	0.632315	61.8353	0.701166	62.6273	0.218818					-0.789667	-0.719032	1.19167	0.168019	1.036	-0.907638	-0.0273333	0.112396		-0.0163333	1.29223	1.688	0.957179	0.571333
550	554	3	11.915	1	FKLQF	9.65733	0.231656	29.164	0.308735	40.5917	0.895798	53.845	0.391694		11.0243	1.26548	28.534	0.201338	40.361	0.429263	53.4607	1.01648		10.8263	1.22797	29.8003	0.733046	39.9017	0.963936	53.6947	1.00161					-1.367	-1.03382	0.63	0.107396	0.230667	0.466535	0.384333	-0.624786		-1.169	1.45963	-0.636333	1.04178	0.69
555	593	27	7.825	4	FYVPVKRSRGTGTPTSPAPRSQTPPLPTDAPRHPGPAEL	45.4663	0.278227	47.3437	0.11698	48.4483	0.293207	49.314	0.397415		46.2317	0.792509	47.3257	0.605198	48.326	0.90426	48.932	0.285175		45.508	0.650021	47.3193	0.182083	48.5213	0.644393	49.1437	0.749369					-0.765333	-0.514282	0.018	-0.488218	0.122333	-0.611053	0.382	0.11224		-0.0416667	0.928248	0.0243333	0.299063	-0.073
594	611	15	13.685	2	GAAPWEESTNDISHYLGM	46.044	1.34876	53.445	0.789616	60.343	1.11445	64.376	0.120801		46.897	1.42299	51.5493	1.10476	60.1283	0.802019	64.3083	1.08707		47.5853	0.305883	53.7497	1.03683	59.7967	0.658502	63.5543	0.487658					-0.853	-0.0742253	1.89567	-0.315144	0.214667	0.312433	0.0676667	-0.966265		-1.54133	1.65464	-0.304667	1.82645	0.546333
594	621	24	14.375	3	GAAPWEESTNDISHYLGMLDPWYERNVL	28.4377	0.956287	39.0277	0.215094	50.0743	0.185516	60.072	0.472031		30.1747	0.873685	38.7693	1.15935	49.3343	1.25108	59.4343	0.898719		30.1393	0.828601	40.0513	1.68854	49.9253	0.44629	59.0253	0.60078					-1.737	0.0826013	0.258333	-0.944253	0.74	-1.06557	0.637667	-0.426689		-1.70167	1.78489	-1.02367	1.90364	0.149
594	623	26	14.475	3	GAAPWEESTNDISHYLGMLDPWYERNVLGL	27.7787	0.584114	37.7907	0.362759	49.3603	0.525357	59.6123	0.33553		28.5493	1.47545	37.6327	0.651111	49.225	0.810572	59.1307	0.801844		30.3177	0.327262	39.1817	1.34392	49.2067	0.744221	58.9157	0.576035					-0.770667	-0.891333	0.158	-0.288352	0.135333	-0.285215	0.481667	-0.466314		-2.539	0.911376	-1.391	1.70668	0.153667
605	611	5	9.835	2	ISHYLGM	23.1033	1.04397	33.2143	0.130615	48.374	0.204076	58.129	0.376897		22.7127	1.9043	32.1797	0.58103	49.2277	0.806576	58.7437	0.296497		24.644	0.976383	32.8757	1.15385	48.5823	0.242838	58.736	0.170625					0.390667	-0.86033	1.03467	-0.450415	-0.853667	-0.6025	-0.614667	0.0803998		-1.54067	2.02036	0.338667	1.28446	-0.208333
605	621	14	13.455	3	ISHYLGMLDPWYERNVL	20.7223	0.43656	31.6887	0.609077	42.6007	0.447965	55.59	0.228886		21.2553	1.33305	30.465	1.3	42.3363	0.591237	55.0887	0.619594		22.967	1.19725	31.0263	1.77518	42.032	0.483991	54.8803	0.430821					-0.533	-0.896493	1.22367	-0.690922	0.264333	-0.143272	0.501333	-0.390708		-2.24467	1.63381	0.662333	2.38426	0.568667
612	623	9	13.725	2	LDPWYERNVLGL	24.4387	1.7857	36.2693	1.35507	48.545	0.465555	62.9577	0.830236		24.4667	0.145514	35.831	2.00005	47.292	0.755016	62.2047	1.0469		25.3547	0.876672	35.845	1.46516	47.0557	0.442579	62.3047	0.449427					-0.028	1.64019	0.438333	-0.644983	1.253	-0.289461	0.753	-0.216668		-0.916	2.66237	0.424333	2.82023	1.48933
622	631	6	12.01	2	GLMHLPPEVL	32.8937	0.58406	51.1783	0.20778	59.5577	0.406691	64.843	0.303835		33.92	1.69952	50.8193	0.380785	59.775	0.145007	64.566	0.824255		34.8503	0.516452	51.3143	0.906634	59.7583	0.187169	64.741	0.664273					-1.02633	-1.11546	0.359	-0.173006	-0.217333	0.261684	0.277	-0.520419		-1.95667	1.10051	-0.136	1.11441	-0.200667
624	631	4	10.835	1	MHLPPEVL	44.0827	0.117462	67.3943	0.141083	76.965	0.109659	80.198	1.05482		44.5443	0.961817	66.882	0.707002	77.3787	0.746797	80.0843	0.36151		45.4437	0.732263	67.8973	1.12189	77.3127	0.234423	80.0003	0.356907					-0.461667	-0.844355	0.512333	-0.565919	-0.413667	-0.637139	0.113667	0.693311		-1.361	0.849725	-0.503	1.26297	-0.347667
632	649	13	8.855	2	CQSLKAEPRPLEGSPAQL	72.817	0.763964	74.898	0.163887	75.788	0.417968	75.1817	0.400605		73.42	0.492166	74.3027	0.208591	75.387	0.930568	75.347	0.276429		72.8963	0.38523	74.5827	0.741987	75.124	0.231145	75.2753	0.174001					-0.603	0.271798	0.595333	-0.0447042	0.401	-0.5126	-0.165333	0.124176		-0.0793333	1.14919	0.315333	0.905875	0.664
632	652	15	11.225	3	CQSLKAEPRPLEGSPAQLPIL	62.6273	0.600916	67.2733	0.393	69.6747	0.450482	71.1763	0.364541		62.6577	0.606401	66.7147	0.358422	69.6463	0.219008	71.322	0.510832		62.434	0.842629	67.578	0.869043	69.82	0.386058	70.8213	0.404989					-0.0303333	-0.00548489	0.558667	0.0345784	0.0283333	0.231475	-0.145667	-0.14629		0.193333	1.44354	-0.304667	1.26204	-0.145333
636	652	11	11.3	2	KAEPRPLEGSPAQLPIL	17.6227	0.677434	38.653	0.532234	47.3703	0.855165	52.8577	0.481997		18.2313	0.966735	39.1207	0.260164	47.237	0.220334	54.05	0.745696		18.8553	0.811111	38.6657	0.502026	47.182	0.63985	53.6923	0.303754					-0.608667	-0.289301	-0.467667	0.27207	0.133333	0.634831	-1.19233	-0.263699		-1.23267	1.48854	-0.0126667	1.03426	0.188333
650	654	3	8.32	1	PILAD	18.472	0.42809	36.8293	1.10613	57.6273	0.403123	74.0177	1.32086		16.435	1.49058	36.0443	1.12551	56.144	0.916074	71.744	0.65915		20.2723	1.68759	38.0113	1.80937	56.936	0.463052	72.6053	0.899501					2.037	-1.06249	0.785	-0.0193808	1.48333	-0.51295	2.27367	0.661706		-1.80033	2.11568	-1.182	2.9155	0.691333
653	657	3	12.04	1	ADMLL	3.547	0.412047	7.764	0.844155	12.4137	1.55143	23.2783	0.546312		3.435	0.385911	7.95933	1.28662	11.3683	1.32195	24.147	0.786643		3.91733	0.0795131	6.75567	1.93543	12.3317	0.554312	24.1887	1.04065					0.112	0.0261367	-0.195333	-0.442466	1.04533	0.229484	-0.868667	-0.24033		-0.370333	0.49156	1.00833	2.77959	0.082
657	662	4	11.525	2	LYYCRF	2.92267	0.40908	3.48733	0.13639	4.31667	0.426944	7.54267	0.570258		2.797	0.386509	3.198	0.294929	4.28667	0.365779	7.20867	0.312382		3.00033	0.152762	3.60133	0.131698	4.50833	0.122042	7.509	0.319338					0.125667	0.0225711	0.289333	-0.158538	0.03	0.0611651	0.334	0.257876		-0.0776667	0.561842	-0.114	0.268088	-0.191667
663	668	3	7.435	1	AARPVL	12.8343	0.245386	29.3443	0.228154	43.9237	0.196615	55.888	0.650082		13.5613	1.08978	29.1583	0.67594	43.3043	0.486181	55.0687	0.974257		13.8703	1.29473	30.2443	0.460784	42.879	1.22306	55.635	0.702966					-0.727	-0.844397	0.186	-0.447785	0.619333	-0.289567	0.819333	-0.324175		-1.036	1.54012	-0.9	0.688939	1.04467
669	676	6	10.955	1	LQVYQTEL	2.08633	0.443074	3.85433	0.668809	8.504	0.120004	15.0407	0.405039		2.42567	0.959898	3.95333	0.435046	8.14	0.525586	14.577	0.532825		2.74433	0.676089	4.05133	0.487067	9.05333	0.226902	15.834	0.391571					-0.339333	-0.516824	-0.099	0.233763	0.364	-0.405582	0.463667	-0.127787		-0.658	1.11916	-0.197	1.15588	-0.549333
669	677	7	10.035	1	LQVYQTELT	2.13867	0.510068	3.08233	0.859979	5.32833	0.294643	12.9227	0.861121		1.995	0.682886	2.52333	0.151583	4.97533	1.1323	11.953	0.31503		2.36933	0.315508	3.04067	0.443488	5.043	0.549533	11.526	0.996816					0.143667	-0.172818	0.559	0.708397	0.353	-0.837654	0.969667	0.546091		-0.230667	0.825576	0.0416667	1.30347	0.285333
669	678	8	13.075	1	LQVYQTELTF	2.375	0.522455	2.42967	0.316885	5.2	0.26783	11.2007	1.5259		1.601	1.04756	2.25667	0.764102	5.05567	1.36506	12.0067	0.973391		1.25133	0.193898	3.23833	0.814823	5.75367	0.760635	11.5867	0.746438					0.774	-0.525106	0.173	-0.447217	0.144333	-1.09723	-0.806	0.552514		1.12367	0.716353	-0.808667	1.13171	-0.553667
672	676	3	8.94	1	YQTEL	2.84633	0.367628	3.28733	0.589597	4.089	1.21102	4.91367	0.620107		3.454	0.707178	3.95167	1.76697	2.752	0.65677	3.605	1.10612		2.98267	0.730018	3.65133	0.764123	4.256	0.448231	4.59867	0.463009					-0.607667	-0.33955	-0.664333	-1.17737	1.337	0.554251	1.30867	-0.486017		-0.136333	1.09765	-0.364	1.35372	-0.167
672	677	4	7.755	1	YQTELT	3.378	0.159972	3.80633	0.459785	3.72367	0.58809	3.49933	0.172587		3.33467	0.250847	3.486	0.194823	3.76367	0.910939	3.62133	0.195359		3.43067	0.102793	3.56567	0.499572	3.794	0.194872	4.00467	0.550091					0.0433333	-0.0908754	0.320333	0.264962	-0.04	-0.32285	-0.122	-0.0227723		-0.0526667	0.262765	0.240667	0.959357	-0.0703333
677	686	8	7.625	1	TFITGEKTTE	23.5773	0.824108	37.1037	0.676578	56.614	0.116073	59.9977	0.202954		23.5743	1.17687	36.6393	0.258314	56.1823	1.1034	60.2027	0.366437		23.6567	0.79491	37.4453	0.621584	56.346	0.291012	59.8373	0.718171					0.003	-0.352762	0.464333	0.418264	0.431667	-0.987326	-0.205	-0.163483		-0.0793333	1.61902	-0.341667	1.29816	0.268
678	686	7	6.52	1	FITGEKTTE	25.7313	0.729902	39.5623	0.595948	54.3597	0.593553	55.4153	0.559193		26.2233	0.95827	39.3017	0.546275	54.326	1.17254	56.0557	0.477089		26.3633	0.992149	39.6757	0.51848	53.9523	0.494843	55.513	0.854669					-0.492	-0.228368	0.260667	0.0496733	0.0336667	-0.578988	-0.640333	0.0821031		-0.632	1.72205	-0.113333	1.11443	0.407333
687	693	5	10.07	2	IFIHSLE	2.54567	0.632562	2.60667	0.344277	3.17567	0.418115	5.216	0.689831		2.72567	0.809623	2.67533	0.483345	3.61133	0.7975	4.28567	0.403887		2.76533	0.556938	2.83967	0.27018	3.39233	0.210013	4.855	1.02873					-0.18	-0.177061	-0.0686667	-0.139068	-0.435667	-0.379385	0.930333	0.285945		-0.219667	1.1895	-0.233	0.614457	-0.216667
687	726	36	10.105	5	IFIHSLELGHSAATRAIKASGPGSKRLGIDGDREAVPLTL	37.9527	0.776537	41.2427	0.772281	41.4493	0.361146	43.3037	0.171786		38.9487	0.50815	40.6683	0.1968	41.7	0.563985	43.3773	0.34179		38.4897	0.448678	40.5137	0.950752	41.518	0.409073	43.5977	0.32535					-0.996	0.268387	0.574333	0.57548	-0.250667	-0.202839	-0.0736667	-0.170004		-0.537	1.22522	0.729	1.72303	-0.0686667
688	694	5	10.07	2	FIHSLEL	2.54567	0.632562	2.60667	0.344277	3.17567	0.418115	5.216	0.689831		2.72567	0.809623	2.67533	0.483345	3.61133	0.7975	4.28567	0.403887		2.76533	0.556938	2.83967	0.27018	3.39233	0.210013	4.855	1.02873					-0.18	-0.177061	-0.0686667	-0.139068	-0.435667	-0.379385	0.930333	0.285945		-0.219667	1.1895	-0.233	0.614457	-0.216667
689	726	34	9.165	5	IHSLELGHSAATRAIKASGPGSKRLGIDGDREAVPLTL	41.1223	0.946026	44.4383	0.497796	45.1943	0.88432	46.3333	0.591365		42.0727	0.070946	43.9093	0.678052	45.284	1.23185	46.5413	0.823214		41.3593	0.465784	43.7893	0.644329	44.9297	0.455138	46.4843	0.0933506					-0.950333	0.87508	0.529	-0.180255	-0.0896667	-0.347529	-0.208	-0.231849		-0.237	1.41181	0.649	1.14213	0.264667
692	726	31	9.17	4	LELGHSAATRAIKASGPGSKRLGIDGDREAVPLTL	44.3907	0.301192	47.799	0.519858	48.2757	0.271574	49.7887	0.0947066		44.887	0.192242	47.008	0.920771	48.6267	1.51992	49.692	0.450163		44.547	0.691503	47.0733	0.455616	47.9497	0.216574	49.631	0.667238					-0.496333	0.108949	0.791	-0.400913	-0.351	-1.24835	0.0966667	-0.355457		-0.156333	0.992695	0.725667	0.975474	0.326
694	726	29	8.71	5	LGHSAATRAIKASGPGSKRLGIDGDREAVPLTL	46.8027	0.571512	50.707	0.137815	51.7397	1.00211	51.782	0.659209		47.5817	0.30568	50.059	0.535658	50.9767	0.80766	51.9873	0.4565		46.9353	0.31966	49.826	0.322284	50.816	0.158502	52.2217	0.0271539					-0.779	0.265832	0.648	-0.397842	0.763	0.19445	-0.205333	0.202709		-0.132667	0.891172	0.881	0.460099	0.923667
727	744	16	8.78	4	QIIYSKGAISGRSRWSNM	22.924	0.439041	35.4943	0.388811	43.7943	0.626859	49.387	0.293974		23.3913	0.683806	35.0137	0.583159	43.1927	0.740731	49.6453	0.249749		23.2797	0.556956	35.1813	0.30907	43.2107	0.0339755	49.6497	0.368579					-0.467333	-0.244765	0.480667	-0.194347	0.601667	-0.113872	-0.258333	0.0442259		-0.355667	0.995997	0.313	0.697882	0.583667
745	749	3	5.555	1	EKLCT	18.2997	1.5275	54.7553	0.95443	61.126	0.563332	65.8353	0.988986		18.994	2.12349	53.513	1.21419	60.1583	0.399468	64.6007	1.63201		19.8773	0.63981	55.0443	1.20312	61.1417	1.247	64.7043	0.506187					-0.694333	-0.595987	1.24233	-0.259764	0.967667	0.163864	1.23467	-0.643025		-1.57767	2.16731	-0.289	2.15755	-0.0156667
750	763	12	8.37	3	SVNLSKACRQQEEL	52.198	0.383004	56.4287	0.149105	59.8623	0.425602	62.205	0.233006		53.1387	0.767855	55.8753	0.363764	59.2373	0.734578	62.2577	0.686767		52.2973	0.598567	56.008	0.327953	59.2673	0.0707413	62.404	0.305423					-0.940667	-0.384851	0.553333	-0.214659	0.625	-0.308975	-0.0526667	-0.453761		-0.0993333	0.981571	0.420667	0.477058	0.595
750	769	18	8.32	3	SVNLSKACRQQEELDSSTEA	57.09	0.416559	60.3363	0.193622	62.9787	0.492502	63.453	0.558024		57.3483	1.01788	59.653	0.195354	61.734	0.774455	63.7463	0.522065		56.9017	0.570752	59.868	0.222162	61.8393	0.299437	63.1663	0.838024					-0.258333	-0.601322	0.683333	-0.0017319	1.24467	-0.281953	-0.293333	0.0359587		0.188333	0.987311	0.468333	0.415784	1.13933
754	763	8	5.885	2	SKACRQQEEL	66.478	1.00379	68.3497	0.486046	68.394	1.35999	69.1017	0.198167		66.9853	1.78102	67.5353	0.193521	67.6473	0.67844	68.903	1.3548		66.8537	1.73517	68.5883	0.429424	67.878	0.551569	67.8253	0.589689					-0.507333	-0.777231	0.814333	0.292525	0.746667	0.681545	0.198667	-1.15663		-0.375667	2.73896	-0.238667	0.91547	0.516
754	769	14	6.12	2	SKACRQQEELDSSTEA	66.6607	1.2134	68.6563	0.813328	67.823	1.43076	68.5517	0.658533		66.509	0.934837	67.75	0.880048	67.6613	0.849036	67.712	0.935468		65.9147	1.09148	68.208	0.898235	67.9027	1.38171	69.1517	0.979988					0.151667	0.278558	0.906333	-0.0667198	0.161667	0.581723	0.839667	-0.276935		0.746	2.30488	0.448333	1.71156	-0.0796667
768	774	5	12.275	1	EALTLNL	21.526	0.553143	35.695	1.34756	36.5923	0.413108	40.0823	1.063		21.9583	0.761664	34.8033	0.72586	36.4387	0.463001	40.055	1.5254		22.4217	0.719615	36.026	0.212389	37.2163	0.882182	39.3673	0.348314					-0.432333	-0.208521	0.891667	0.621696	0.153667	-0.0498933	0.0273333	-0.462392		-0.895667	1.27276	-0.331	1.55994	-0.624
770	774	3	11.915	1	LTLNL	21.8333	0.464728	33.181	0.408232	33.5023	0.2625	36.6637	0.667523		21.274	1.96696	32.3313	0.32159	32.895	0.595841	36.07	0.274531		22.564	0.591368	33.0277	0.523164	33.8457	0.43404	36.1837	0.334455					0.559333	-1.50223	0.849667	0.0866412	0.607333	-0.333341	0.593667	0.392992		-0.730667	1.0561	0.153333	0.931395	-0.343333
775	794	17	5.355	3	TEVVKRQTPKSKKGFNQIST	58.8093	1.24268	64.0387	0.358538	65.957	1.02639	67.5653	0.0916588		58.0663	1.55901	62.972	0.920137	66.14	0.93395	67.1247	2.25705		58.633	0.296896	64.627	1.20458	66.7273	1.15059	67.6333	0.745443					0.743	-0.316334	1.06667	-0.561599	-0.183	0.0924371	0.440667	-2.16539		0.176333	1.53957	-0.588333	1.56312	-0.770333
775	796	19	5.27	3	TEVVKRQTPKSKKGFNQISTSQ	58.7757	0.990354	63.1053	1.01559	65.3697	0.752698	66.3037	0.177579		59.46	0.776773	62.6143	0.423152	64.7587	0.699267	66.2343	1.26656		58.738	0.703307	64.0143	0.509926	65.0943	0.718575	65.8083	0.51878					-0.684333	0.213581	0.491	0.592439	0.611	0.053431	0.0693333	-1.08898		0.0376667	1.69366	-0.909	1.52552	0.275333
775	815	37	9.955	5	TEVVKRQTPKSKKGFNQISTSQIKVDKVQIIGSNSCPFAVC	20.5057	0.161649	25.701	1.57314	27.8487	0.316231	29.6067	0.212804		21.1067	0.44536	24.9413	0.625497	27.7837	0.452417	29.2243	0.333714		20.6913	0.818979	24.976	0.849575	27.635	0.689309	29.248	0.303481					-0.601	-0.283711	0.759667	0.947646	0.065	-0.136186	0.382333	-0.120911		-0.185667	0.980628	0.725	2.42272	0.213667
777	815	35	9.93	5	VVKRQTPKSKKGFNQISTSQIKVDKVQIIGSNSCPFAVC	18.4807	0.323655	21.6333	0.625247	23.562	0.285375	25.4977	0.52851		18.999	0.763866	21.18	0.319456	23.6	0.571693	24.9737	0.28029		18.7963	0.326301	21.423	0.680179	23.429	0.113503	25.3327	0.514582					-0.518333	-0.440212	0.453333	0.305792	-0.038	-0.286318	0.524	0.24822		-0.315667	0.649956	0.210333	1.30543	0.133
797	815	16	11.7	3	IKVDKVQIIGSNSCPFAVC	7.21467	0.056748	9.55767	0.437895	10.297	0.0471487	14.0233	0.138226		7.54233	0.636561	9.346	0.398599	10.4907	0.507265	13.747	0.320108		7.741	0.386166	9.796	0.222704	10.6507	0.218711	13.9073	0.307339					-0.327667	-0.579813	0.211667	0.0392965	-0.193667	-0.460116	0.276333	-0.181882		-0.526333	0.442914	-0.238333	0.660599	-0.353667
797	816	17	13.06	3	IKVDKVQIIGSNSCPFAVCL	7.173	0.081431	10.4563	0.343315	14.2743	0.113778	17.6607	0.198026		7.564	0.466597	10.327	0.238199	14.2437	0.446754	17.384	0.203162		7.58667	0.479231	10.5627	0.294507	14.4183	0.116543	17.479	0.281169					-0.391	-0.385166	0.129333	0.105116	0.0306667	-0.332977	0.276667	-0.0051364		-0.413667	0.560662	-0.106333	0.637822	-0.144
816	826	9	7.685	3	LDQDERKILQS	21.007	1.0257	49.243	1.03233	61.5433	0.8115	69.9383	0.490147		22.0333	1.35662	48.6197	1.2643	60.7967	1.18434	69.934	0.809697		22.1433	1.52115	48.675	0.748219	61.189	0.338173	70.3897	1.30041					-1.02633	-0.330918	0.623333	-0.231972	0.746667	-0.372842	0.00433333	-0.31955		-1.13633	2.54686	0.568	1.78054	0.354333
816	830	13	11.33	4	LDQDERKILQSVIRC	14.3167	0.582078	33.1737	0.17257	41.589	0.580855	47.3837	0.0092376		14.641	0.663112	32.869	0.601125	41.408	0.240676	47.1683	0.389027		15.0447	0.763891	33.378	0.403104	41.5193	0.485908	47.3717	0.540495					-0.324333	-0.081034	0.304667	-0.428555	0.181	0.340179	0.215333	-0.37979		-0.728	1.34597	-0.204333	0.575674	0.0696667
821	830	8	8.105	3	RKILQSVIRC	12.6207	0.40993	26.3973	0.454254	32.451	0.504542	39.218	0.451851		13.164	0.658658	26.2007	0.143228	32.146	0.491436	39.072	0.747819		13.4303	1.01801	26.376	0.589552	32.149	0.314425	38.8887	0.325715					-0.543333	-0.248729	0.196667	0.311025	0.305	0.0131067	0.146	-0.295968		-0.809667	1.42794	0.0213333	1.04381	0.302
831	861	19	9.155	4	EVSPCYKPEKSSLCPPPQRPSYPPAPATPDL	58.0013	0.180943	60.7933	0.350817	63.5633	0.315411	64.789	0.28942		58.7127	0.462157	60.4197	0.429634	63.8997	0.513278	65.037	0.36246		58.102	0.598261	60.7153	0.652436	63.5507	0.338104	64.8393	0.207097					-0.711333	-0.281214	0.373667	-0.0788173	-0.336333	-0.197867	-0.248	-0.0730395		-0.100667	0.779204	0.078	1.00325	0.0126667
844	861	9	9.43	2	CPPPQRPSYPPAPATPDL	77.268	0.379904	77.9783	0.562111	77.657	0.513977	77.2503	0.469657		77.735	0.137884	77.3377	0.338612	78.0993	0.659573	77.2547	0.173368		76.9713	0.49937	78.0073	0.572225	77.6993	0.280429	77.188	0.392034					-0.467	0.24202	0.640667	0.223499	-0.442333	-0.145596	-0.00433333	0.296289		0.296667	0.879274	-0.029	1.13434	-0.0423333
865	877	9	14.66	2	LCLPIMTFSGALP	19.099	0.913388	28.4023	1.34082	34.9657	0.644998	42.2167	1.22292		18.8987	0.987861	27.5513	1.21081	34.6557	0.724838	43.919	0.159145		21.4887	0.804006	30.9203	0.330585	36.9407	0.0596853	45.0997	1.08442					0.200333	-0.0744738	0.851	0.130019	0.31	-0.0798402	-1.70233	1.06377		-2.38967	1.71739	-2.518	1.67141	-1.975
868	877	7	13.035	2	PIMTFSGALP	23.863	0.361565	37.4793	0.345261	48.1483	0.684453	56.9373	0.57419		24.993	1.20878	37.4413	0.550361	47.741	0.755574	56.5147	0.619858		25.275	0.297928	38.0633	0.885648	47.651	0.244759	56.6243	0.212801					-1.13	-0.847219	0.038	-0.2051	0.407333	-0.0711206	0.422667	-0.0456682		-1.412	0.659492	-0.584	1.23091	0.497333
872	877	3	9.78	1	FSGALP	35.06	0.956047	61.325	0.606804	76.3257	0.740836	78.8547	0.905719		36.185	1.90539	61.416	1.05861	75.9673	0.811761	79.3967	0.64802		37.0997	0.672447	61.705	0.73845	75.4643	0.308108	78.5873	0.453249					-1.125	-0.949348	-0.091	-0.45181	0.358333	-0.0709257	-0.542	0.257698		-2.03967	1.62849	-0.38	1.34525	0.861333
[truncated: 5 more columns]

## Sheet: Fig 4-Fig supplement 1 raw data
p110 peptides
							3s						3s						3s						30s						30s						30s						300s						300s
State	Start	End	Sequence	Search RT	Charge	Max D	Start RT	End RT	#D	%D	Score	Conf	Start RT	End RT	#D	%D	Score	Conf	Start RT	End RT	#D	%D	Score	Conf	Start RT	End RT	#D	%D	Score	Conf	Start RT	End RT	#D	%D	Score	Conf	Start RT	End RT	#D	%D	Score	Conf	Start RT	End RT	#D	%D	Score	Conf	Start RT
APO	4	12	ENYKQPVVL	9.05	1	6	9.3	9.37	4.982	83.037	0.7544	Medium	9.29	9.38	5.008	83.474	0.756	Medium	9.3	9.37	5.049	84.155	0.6827	Medium	9.3	9.37	4.916	81.931	0.7561	Medium	9.39	9.46	4.827	80.449	0.7308	Medium	9.24	9.32	4.825	80.415	0.7282	Medium	9.3	9.37	5.049	84.145	0.7363	Medium	9.3
APO	6	12	YKQPVVL	8.77	1	4	9.02	9.16	3.683	92.068	0.9121	Medium	9.03	9.17	3.699	92.468	0.9157	Medium	9.02	9.16	3.714	92.848	0.9148	Medium	9.02	9.16	3.755	93.872	0.9081	Medium	9.02	9.16	3.741	93.517	0.9105	Medium	9.03	9.17	3.729	93.221	0.9178	Medium	9.02	9.16	3.751	93.766	0.9184	Medium	9.02
APO	13	32	REDNCRRRRRMKPRSAAASL	3.92	5	17	4.1	4.42	7.387	43.451	0.9535	High	4.1	4.42	7.698	45.283	0.9507	High	4.1	4.42	7.75	45.59	0.9383	High	4.1	4.42	7.519	44.23	0.9509	High	4.1	4.42	7.485	44.032	0.94	High	4.1	4.42	7.835	46.087	0.9472	High	4.36	4.43	7.727	45.455	0.9453	High	4.1
APO	33	37	SSMEL	9.72	1	3	9.74	9.76	2.107	70.242	0.7495	Medium	9.74	9.76	2.066	68.878	0.6905	Medium	9.74	9.76	2.129	70.978	0.5553	Medium	9.74	9.76	2.319	77.288	0.7129	Medium	9.77	9.84	2.318	77.258	0.7472	Medium	9.75	9.81	2.271	75.689	0.7585	Medium	9.76	9.83	2.391	79.687	0.7592	Medium	9.73
APO	36	41	ELIPIE	10.66	1	3	10.89	11.16	0.107	3.57	0.8087	Medium	10.89	11.16	0.078	2.612	0.8058	Medium	10.89	11.16	0.094	3.137	0.8141	Medium	10.89	11.16	0.125	4.162	0.8149	Medium	10.89	11.16	0.119	3.957	0.8093	Medium	10.9	11.16	0.166	5.527	0.8184	Medium	10.89	11.16	0.316	10.534	0.8282	Medium	10.89
APO	42	58	FVLPTSQRKCKSPETAL	8.39	3	13	8.51	8.77	4.298	33.061	0.9121	High	8.51	8.78	4.298	33.059	0.9105	High	8.52	8.78	4.238	32.601	0.9082	High	8.51	8.77	5.431	41.775	0.9148	High	8.52	8.78	5.337	41.053	0.9102	High	8.51	8.78	5.403	41.558	0.9054	High	8.52	8.78	6.214	47.804	0.9104	Medium	8.52
APO	43	59	VLPTSQRKCKSPETALL	8.07	3	13	8.26	8.33	4.541	34.93	0.7467	Medium	8.3	8.46	4.64	35.696	0.7673	Medium	8.3	8.47	4.322	33.247	0.7482	Medium	8.3	8.37	5.649	43.452	0.7531	Medium	8.33	8.41	5.488	42.219	0.7537	Medium	8.3	8.37	5.655	43.497	0.7647	Medium	8.3	8.37	6.487	49.9	0.7185	Medium	8.29
APO	59	70	LHVAGHGNVEQM	6.68	2	10	6.8	7.07	0.867	8.667	0.8466	Medium	6.79	7.06	0.734	7.344	0.8402	Medium	6.8	7.07	0.705	7.045	0.8504	Medium	6.8	7.07	1.527	15.266	0.872	Medium	6.8	7.06	1.495	14.954	0.8554	Medium	6.79	7.06	1.551	15.51	0.8535	Medium	6.8	7.07	2.054	20.538	0.8477	Medium	6.8
APO	59	72	LHVAGHGNVEQMKA	5.97	2	12	6.09	6.52	0.674	5.614	0.6976	Medium	6.09	6.52	0.672	5.596	0.7283	Medium	6.09	6.52	0.814	6.782	0.7134	Medium	6.09	6.52	1.357	11.31	0.7141	Medium	6.09	6.52	1.322	11.015	0.7186	Medium	6.09	6.52	1.442	12.016	0.7277	Medium	6.09	6.52	1.926	16.053	0.701	Medium	6.09
APO	60	70	HVAGHGNVEQM	5.37	1	9	5.46	5.78	0.688	7.646	0.7932	Medium	5.46	5.77	0.626	6.951	0.798	Medium	5.46	5.77	0.713	7.918	0.786	Medium	5.46	5.78	1.356	15.062	0.807	Medium	5.46	5.77	1.317	14.635	0.8011	Medium	5.46	5.77	1.349	14.988	0.8044	Medium	5.46	5.77	1.706	18.956	0.7734	Medium	5.46
APO	60	75	HVAGHGNVEQMKAQVW	8.28	3	14	8.45	8.69	0.395	2.825	0.8494	Medium	8.45	8.69	0.459	3.276	0.847	Medium	8.45	8.69	0.434	3.101	0.7826	Medium	8.45	8.69	0.777	5.551	0.8107	Medium	8.45	8.69	0.739	5.277	0.8017	Medium	8.45	8.7	0.815	5.823	0.8076	Medium	8.45	8.69	1.129	8.067	0.7995	Medium	8.45
APO	60	78	HVAGHGNVEQMKAQVWLRA	8.62	4	17	8.81	8.88	0.495	2.909	0.7609	Medium	8.82	8.89	0.532	3.129	0.6858	Medium	8.96	9.03	0.511	3.006	0.787	Medium	8.81	8.88	1.151	6.768	0.6525	Medium	8.87	8.94	1.106	6.507	0.7017	Medium	8.82	8.89	0.939	5.521	0.6267	Medium	8.81	8.89	1.554	9.143	0.5636	Medium	8.81
APO	71	76	KAQVWL	10.67	1	4	10.98	11.04	0.134	3.348	0.8752	Medium	10.97	11.04	0.111	2.785	0.8678	Medium	10.98	11.04	0.148	3.692	0.8735	Medium	10.98	11.04	0.142	3.542	0.8816	Medium	10.97	11.04	0.136	3.404	0.8726	Medium	10.95	11.01	0.17	4.253	0.8787	Medium	10.98	11.04	0.208	5.205	0.8365	Medium	10.98
APO	71	78	KAQVWLRA	8.69	2	6	8.64	8.86	0.204	3.397	0.8639	Medium	8.64	8.87	0.164	2.727	0.8317	Medium	8.64	8.86	0.236	3.93	0.8201	Medium	8.64	8.86	0.27	4.502	0.8575	Medium	8.64	8.86	0.186	3.092	0.8362	Medium	8.64	8.86	0.255	4.256	0.861	Medium	8.64	8.86	0.624	10.395	0.8846	Medium	8.64
APO	79	84	LETSVA	6.26	1	4	6.46	6.72	2.202	55.051	0.8642	Medium	6.46	6.71	2.166	54.139	0.8734	Medium	6.46	6.71	2.181	54.514	0.8662	Medium	6.46	6.72	2.976	74.391	0.8641	Medium	6.59	6.65	3.023	75.578	0.8666	Medium	6.46	6.71	2.942	73.558	0.8574	Medium	6.46	6.71	3.268	81.693	0.8758	Medium	6.46
APO	79	86	LETSVAAD	6.15	1	6	6.33	6.58	3.15	52.505	0.9183	Medium	6.43	6.5	3.263	54.383	0.9144	Medium	6.33	6.58	3.249	54.154	0.8869	Medium	6.33	6.58	4.401	73.353	0.8951	Medium	6.33	6.58	4.394	73.229	0.8827	Medium	6.32	6.57	4.449	74.147	0.8812	Medium	6.33	6.58	4.886	81.434	0.8761	Medium	6.33
APO	87	99	FYHRLGPHHFLLL	10.45	3	10	10.54	10.95	0.327	3.268	0.7904	Medium	10.54	10.95	0.324	3.244	0.8054	Medium	10.54	10.95	0.342	3.419	0.8067	Medium	10.54	10.95	0.766	7.663	0.768	Medium	10.54	10.95	0.646	6.459	0.7992	Medium	10.54	10.95	0.651	6.507	0.7919	Medium	10.54	10.95	0.904	9.035	0.7733	Medium	10.54
APO	88	98	YHRLGPHHFLL	8.5	4	8	8.93	9.01	0.283	3.532	0.6657	Medium	8.95	9.02	0.345	4.307	0.7144	Medium	8.93	9.01	0.353	4.41	0.708	Medium	8.91	8.98	0.857	10.716	0.6221	Medium	8.93	9.01	0.755	9.433	0.67	Medium	8.93	9.02	0.817	10.218	0.6827	Medium	8.93	9.01	1.129	14.114	0.6225	Medium	8.93
APO	100	106	YQKKGQW	6.04	2	5	6.25	6.46	1.773	35.462	0.9039	High	6.24	6.45	1.825	36.495	0.8925	High	6.24	6.45	1.807	36.131	0.8612	Medium	6.25	6.46	2.768	55.363	0.8968	High	6.24	6.45	2.737	54.734	0.8728	Medium	6.24	6.45	2.787	55.745	0.8851	Medium	6.24	6.45	3.165	63.299	0.872	Medium	6.24
APO	107	113	YEIYDKY	9.1	1	5	9.3	9.53	1	20.006	0.8417	Medium	9.3	9.54	1.043	20.861	0.8477	Medium	9.31	9.53	1.055	21.107	0.823	Medium	9.3	9.53	1.92	38.399	0.8048	Medium	9.41	9.47	1.8	35.996	0.8543	Medium	9.3	9.54	1.813	36.26	0.8222	Medium	9.31	9.53	2.749	54.987	0.7873	Medium	9.31
APO	107	118	YEIYDKYQVVQT	9.59	2	10	9.67	9.74	1.033	10.329	0.87	Medium	9.68	9.74	1.089	10.887	0.8647	Medium	9.68	9.74	1.081	10.81	0.8212	Medium	9.67	9.74	2.006	20.057	0.8413	Medium	9.67	9.74	1.875	18.752	0.8261	Medium	9.68	9.75	1.926	19.258	0.8439	Medium	9.67	9.74	3.209	32.089	0.7897	Medium	9.68
APO	107	119	YEIYDKYQVVQTL	10.88	2	11	11.05	11.13	0.996	9.058	0.8161	Medium	11.05	11.12	1.036	9.423	0.7886	Medium	11.05	11.13	1.012	9.2	0.6942	Medium	11.05	11.13	1.843	16.755	0.7738	Medium	11.05	11.13	1.805	16.411	0.6969	Medium	11.06	11.13	1.892	17.197	0.7966	Medium	11.05	11.13	3.195	29.046	0.7054	Medium	11.05
APO	114	121	QVVQTLDC	8.83	1	6	9.04	9.24	1.105	18.411	0.8837	Medium	9.05	9.24	1.164	19.406	0.8755	Medium	9.05	9.24	1.16	19.34	0.834	Medium	9.04	9.24	1.464	24.403	0.8642	Medium	9.04	9.24	1.451	24.189	0.8479	Medium	9.05	9.24	1.584	26.406	0.8659	Medium	9.05	9.24	1.609	26.821	0.8108	Medium	9.05
APO	122	137	LRYWKATHRSPGQIHL	7.53	4	13	7.78	8.1	0.772	5.941	0.884	Medium	7.78	8.1	0.782	6.018	0.8839	Medium	7.79	8.11	0.79	6.08	0.8626	Medium	7.78	8.1	1.837	14.128	0.8885	Medium	7.79	8.1	1.584	12.182	0.8565	Medium	7.78	8.1	1.698	13.065	0.8685	Medium	7.79	8.11	2.999	23.071	0.8757	Medium	7.79
APO	122	149	LRYWKATHRSPGQIHLVQRHPPSEESQA	6.41	5	23	6.52	6.92	2.388	10.381	0.8893	Medium	6.52	6.91	2.472	10.748	0.8937	Medium	6.52	6.91	2.495	10.85	0.8411	Medium	6.52	6.92	4.026	17.504	0.8519	Medium	6.52	6.91	3.989	17.345	0.8431	Medium	6.52	6.91	4.107	17.856	0.8221	Medium	6.52	6.91	6.474	28.149	0.8093	Medium	6.52
APO	125	149	WKATHRSPGQIHLVQRHPPSEESQA	5.89	4	20	5.92	6.26	2.839	14.193	0.8199	Medium	5.91	6.26	3.065	15.323	0.8282	Medium	5.92	6.26	2.935	14.673	0.7786	Medium	5.92	6.26	4.399	21.996	0.802	Medium	5.91	6.26	4.302	21.509	0.7937	Medium	5.91	6.26	4.518	22.591	0.7575	Medium	5.92	6.26	5.9	29.502	0.7906	Medium	5.91
APO	138	149	VQRHPPSEESQA	3.99	2	8	4.14	4.49	3.139	39.234	0.9351	High	4.13	4.48	3.287	41.094	0.9357	High	4.13	4.49	3.271	40.884	0.9294	High	4.14	4.49	4.004	50.056	0.9398	High	4.13	4.49	3.893	48.659	0.9369	High	4.13	4.48	4.134	51.677	0.9352	High	4.14	4.49	5.093	63.665	0.9297	Medium	4.13
APO	138	150	VQRHPPSEESQAF	6.68	2	9	6.88	7.15	3.008	33.419	0.8085	Medium	6.87	7.15	3.012	33.471	0.8164	Medium	6.87	7.15	2.923	32.482	0.801	Medium	6.88	7.15	4.195	46.613	0.8116	Medium	6.87	7.15	4.135	45.946	0.8036	Medium	6.87	7.15	4.258	47.307	0.8141	Medium	6.87	7.15	5.336	59.287	0.7827	Medium	6.87
APO	150	157	FQRQLTAL	9.15	2	6	9.5	9.54	0.127	2.112	0.9037	Medium	9.5	9.55	0.154	2.559	0.9059	Medium	9.5	9.54	0.171	2.843	0.8978	Medium	9.5	9.54	0.338	5.638	0.9061	Medium	9.5	9.54	0.318	5.303	0.9031	Medium	9.5	9.55	0.38	6.338	0.916	Medium	9.5	9.54	1.132	18.87	0.8533	Medium	9.5
APO	151	157	QRQLTAL	8.12	2	5	8.3	8.51	0.172	3.434	0.9273	Medium	8.3	8.5	0.188	3.757	0.9255	Medium	8.3	8.51	0.235	4.693	0.9138	Medium	8.3	8.51	0.394	7.873	0.92	Medium	8.3	8.51	0.354	7.071	0.9231	Medium	8.3	8.5	0.413	8.259	0.931	Medium	8.3	8.51	1.029	20.586	0.9188	Medium	8.3
APO	158	164	IGYDVTD	8.23	1	5	8.46	8.68	0.725	14.496	0.9176	High	8.45	8.68	0.725	14.51	0.9113	High	8.46	8.69	0.757	15.144	0.9148	Medium	8.46	8.68	1.069	21.38	0.9258	High	8.46	8.68	1.048	20.96	0.9152	Medium	8.45	8.69	1.147	22.932	0.9012	Medium	8.46	8.68	2.23	44.599	0.9068	Medium	8.46
APO	158	173	IGYDVTDVSNVHDDEL	10.34	2	14	10.49	10.84	3.313	23.664	0.8664	Medium	10.49	10.84	3.324	23.743	0.8608	Medium	10.49	10.84	3.241	23.149	0.8502	Medium	10.49	10.84	4.768	34.059	0.8334	Medium	10.49	10.84	4.605	32.895	0.835	Medium	10.49	10.85	4.7	33.573	0.831	Medium	10.49	10.84	5.988	42.772	0.8463	Medium	10.49
APO	158	174	IGYDVTDVSNVHDDELE	9.9	2	15	10.09	10.43	3.361	22.408	0.906	Medium	10.09	10.43	3.43	22.865	0.9086	Medium	10.1	10.43	3.33	22.201	0.8962	Medium	10.09	10.43	4.826	32.175	0.8963	Medium	10.09	10.43	4.622	30.812	0.8929	Medium	10.1	10.43	4.751	31.672	0.8921	Medium	10.09	10.43	6.275	41.83	0.8946	Medium	10.1
APO	158	175	IGYDVTDVSNVHDDELEF	12.15	2	16	12.28	12.54	3.287	20.544	0.8588	Medium	12.27	12.53	3.223	20.145	0.8743	Medium	12.28	12.54	3.174	19.837	0.8469	Medium	12.28	12.54	4.603	28.77	0.8654	Medium	12.27	12.53	4.471	27.941	0.8934	Medium	12.27	12.53	4.609	28.807	0.8208	Medium	12.28	12.54	6.137	38.353	0.8359	Medium	12.28
APO	161	173	DVTDVSNVHDDEL	9.02	1	11	9.19	9.42	3.026	27.509	0.8148	Medium	9.18	9.43	3.151	28.644	0.7982	Medium	9.19	9.42	3.029	27.538	0.7703	Medium	9.19	9.42	4.32	39.273	0.8024	Medium	9.19	9.42	4.274	38.855	0.8007	Medium	9.18	9.43	4.361	39.648	0.8059	Medium	9.19	9.42	4.976	45.236	0.7719	Medium	9.19
APO	161	174	DVTDVSNVHDDELE	8.39	2	12	8.56	8.87	3.13	26.082	0.921	High	8.56	8.87	3.196	26.633	0.9307	High	8.57	8.87	3.154	26.283	0.9294	High	8.57	8.87	4.436	36.964	0.9303	High	8.57	8.87	4.291	35.76	0.936	High	8.57	8.87	4.418	36.818	0.9271	High	8.57	8.87	5.351	44.592	0.9173	Medium	8.57
APO	161	175	DVTDVSNVHDDELEF	11.36	2	13	11.56	11.84	2.949	22.683	0.8872	Medium	11.55	11.84	2.959	22.758	0.8871	Medium	11.56	11.84	2.918	22.443	0.8893	Medium	11.56	11.84	4.098	31.523	0.8935	Medium	11.55	11.84	3.988	30.674	0.8864	Medium	11.56	11.84	4.097	31.518	0.8841	Medium	11.55	11.84	5.039	38.762	0.8814	Medium	11.56
APO	165	173	VSNVHDDEL	7.22	2	7	7.39	7.61	1.364	19.484	0.8318	Medium	7.38	7.61	1.428	20.405	0.822	Medium	7.38	7.61	1.406	20.081	0.7939	Medium	7.38	7.61	2.547	36.389	0.8132	Medium	7.38	7.61	2.484	35.482	0.7857	Medium	7.38	7.61	2.533	36.183	0.8109	Medium	7.38	7.61	2.915	41.64	0.7893	Medium	7.38
APO	165	175	VSNVHDDELEF	10.56	2	9	10.79	10.99	1.276	14.179	0.7875	Medium	10.79	10.99	1.304	14.491	0.7735	Medium	10.79	10.99	1.277	14.194	0.7411	Medium	10.79	10.99	2.21	24.554	0.7696	Medium	10.79	10.99	2.15	23.887	0.7488	Medium	10.8	11	2.253	25.03	0.7874	Medium	10.79	10.99	2.663	29.594	0.7636	Medium	10.79
APO	174	182	EFTRRGLVT	7	2	7	7.23	7.5	0.242	3.455	0.9076	Medium	7.23	7.5	0.28	3.995	0.9024	Medium	7.23	7.5	0.294	4.205	0.8905	Medium	7.23	7.5	0.343	4.895	0.9031	Medium	7.23	7.5	0.332	4.747	0.9	Medium	7.23	7.5	0.408	5.828	0.8957	Medium	7.23	7.5	0.715	10.207	0.9027	Medium	7.23
APO	174	195	EFTRRGLVTPRMAEVASRDPKL	8.28	5	18	8.35	8.77	1.329	7.384	0.8391	Medium	8.35	8.78	1.322	7.344	0.8369	Medium	8.36	8.78	1.315	7.306	0.8111	Medium	8.35	8.77	1.959	10.883	0.778	Medium	8.36	8.78	1.876	10.424	0.8024	Medium	8.35	8.78	1.996	11.086	0.7268	Medium	8.36	8.78	3.623	20.127	0.7543	Medium	8.36
APO	175	182	FTRRGLVT	6.2	1	6	6.53	6.61	0.161	2.69	0.8564	Medium	6.52	6.59	0.276	4.592	0.8571	Medium	6.53	6.6	0.289	4.823	0.8536	Medium	6.53	6.61	0.367	6.125	0.8846	Medium	6.53	6.6	0.376	6.27	0.8388	Medium	6.52	6.6	0.369	6.146	0.8765	Medium	6.53	6.6	0.704	11.734	0.8415	Medium	6.53
APO	175	185	FTRRGLVTPRM	7.37	3	8	7.4	7.72	0.057	0.714	0.7407	Medium	7.39	7.72	0.101	1.259	0.7445	Medium	7.39	7.72	0.029	0.361	0.6608	Medium	7.39	7.72	0.126	1.575	0.6629	Medium	7.39	7.72	0.022	0.274	0.6438	Medium	7.39	7.72	0.086	1.077	0.6473	Medium	7.39	7.72	0.615	7.693	0.6766	Medium	7.39
APO	176	182	TRRGLVT	4.73	2	5	5.02	5.27	0.178	3.557	0.955	Medium	5.01	5.27	0.196	3.921	0.949	Medium	5.02	5.27	0.222	4.438	0.9377	Medium	5.02	5.27	0.288	5.758	0.9508	Medium	5.02	5.27	0.276	5.525	0.9423	Medium	5.01	5.27	0.344	6.883	0.9462	Medium	5.02	5.27	0.654	13.072	0.9266	Medium	5.02
APO	176	185	TRRGLVTPRM	6.52	2	7	6.87	6.89	0.427	6.105	0.7773	Medium	6.86	6.89	0.54	7.716	0.7545	Medium	6.86	6.89	0.543	7.761	0.6689	Medium	6.87	6.89	0.534	7.635	0.7442	Medium	6.9	6.96	0.427	6.103	0.7554	Medium	6.86	6.88	0.564	8.054	0.7542	Medium	6.86	6.89	0.816	11.651	0.7625	Medium	6.86
APO	176	187	TRRGLVTPRMAE	6.56	3	9	6.65	6.76	0.306	3.399	0.9165	Medium	6.64	6.75	0.316	3.511	0.8998	Medium	6.65	6.75	0.356	3.957	0.8683	Medium	6.65	6.76	0.436	4.844	0.8774	Medium	6.64	6.75	0.47	5.222	0.8744	Medium	6.64	6.75	0.56	6.218	0.879	Medium	6.65	6.75	1.004	11.156	0.879	Medium	6.64
APO	186	195	AEVASRDPKL	5.99	2	7	6.25	6.46	1.182	16.887	0.9394	Medium	6.25	6.46	1.234	17.633	0.9339	Medium	6.25	6.46	1.252	17.883	0.9379	Medium	6.25	6.46	1.857	26.531	0.9331	Medium	6.25	6.46	1.859	26.557	0.9212	Medium	6.25	6.46	1.899	27.135	0.9307	Medium	6.25	6.46	3.02	43.138	0.9457	Medium	6.25
APO	188	195	VASRDPKL	5.31	2	5	5.54	5.77	1.13	22.606	0.9353	Medium	5.53	5.76	1.184	23.677	0.9228	Medium	5.54	5.76	1.209	24.186	0.9143	Medium	5.54	5.77	1.688	33.754	0.9278	Medium	5.54	5.76	1.693	33.851	0.9166	Medium	5.53	5.76	1.744	34.885	0.927	Medium	5.54	5.76	2.458	49.16	0.9334	Medium	5.54
APO	196	211	YAMHPWVTSKPLPEYL	11.83	2	11	11.82	12.33	3.075	27.959	0.936	High	11.81	12.32	3.068	27.891	0.9325	High	11.82	12.33	3.083	28.03	0.9357	High	11.82	12.33	4.051	36.832	0.9374	High	11.81	12.32	3.964	36.035	0.908	High	11.81	12.32	4.018	36.524	0.9255	High	11.81	12.33	5.411	49.192	0.9242	High	11.82
APO	196	221	YAMHPWVTSKPLPEYLWKKIANNCIF	13.03	4	21	13.27	13.53	6.904	32.877	0.7969	Medium	13.26	13.52	6.985	33.263	0.7738	Medium	13.27	13.53	7.08	33.715	0.7195	Medium	13.27	13.53	9.152	43.582	0.7608	Medium	13.26	13.52	9.113	43.397	0.7046	Medium	13.26	13.52	9.214	43.876	0.7681	Medium	13.27	13.53	12.276	58.457	0.7459	Medium	13.27
APO	212	221	WKKIANNCIF	10.5	1	8	10.61	11	1.93	24.119	0.8651	Medium	10.6	11	1.91	23.881	0.8741	Medium	10.61	11	1.899	23.738	0.869	Medium	10.61	11	2.988	37.351	0.866	Medium	10.61	11	2.878	35.975	0.8487	Medium	10.61	11.01	3.003	37.531	0.8587	Medium	10.61	11	4.458	55.729	0.8394	Medium	10.61
APO	222	232	IVIHRSTTSQT	4.69	2	9	4.81	5.11	3.189	35.433	0.9143	Medium	4.8	5.11	3.1	34.439	0.9009	Medium	4.81	5.11	3.105	34.501	0.9079	Medium	4.81	5.11	3.164	35.153	0.9225	Medium	4.81	5.11	3.197	35.525	0.9102	Medium	4.8	5.11	3.285	36.501	0.9218	Medium	4.81	5.11	3.487	38.739	0.9185	Medium	4.81
APO	222	245	IVIHRSTTSQTIKVSPDDTPGAIL	9.09	4	20	9.11	9.59	2.494	12.471	0.9106	High	9.12	9.59	2.542	12.708	0.9081	High	9.11	9.59	2.499	12.496	0.9119	High	9.11	9.59	3.382	16.909	0.9134	High	9.11	9.59	3.273	16.364	0.9089	High	9.12	9.6	3.383	16.917	0.9125	High	9.11	9.59	4.17	20.85	0.9126	High	9.11
APO	233	245	IKVSPDDTPGAIL	9.96	2	9	10.16	10.46	0.96	10.666	0.9127	Medium	10.16	10.46	0.965	10.726	0.8971	Medium	10.16	10.47	1.003	11.141	0.9022	Medium	10.16	10.46	1.285	14.282	0.9069	Medium	10.34	10.41	1.248	13.872	0.9167	Medium	10.17	10.47	1.317	14.638	0.9153	Medium	10.16	10.46	2.063	22.919	0.8986	Medium	10.16
APO	249	269	FTKMAKKKSLMDIPESQSEQD	7.32	3	18	7.46	7.82	9.825	54.581	0.9261	High	7.46	7.82	9.856	54.755	0.9212	High	7.46	7.82	9.75	54.166	0.9075	High	7.46	7.82	10.512	58.4	0.9307	High	7.46	7.82	10.473	58.184	0.9143	High	7.46	7.82	10.507	58.371	0.9199	High	7.46	7.82	10.461	58.116	0.9251	High	7.46
APO	250	269	TKMAKKKSLMDIPESQSEQD	7.4	2	17	7.25	7.49	9.225	54.263	0.7463	Medium	7.25	7.49	9.41	55.354	0.7822	Medium	7.26	7.49	9.047	53.219	0.726	Medium	7.25	7.49	10.132	59.598	0.7559	Medium	7.26	7.49	10.089	59.346	0.7644	Medium	7.25	7.49	10.13	59.587	0.7363	Medium	7.26	7.49	10.29	60.531	0.7146	Medium	7.26
APO	270	278	FVLRVCGRD	8.8	3	7	8.98	9.3	0.33	4.718	0.8455	Medium	8.98	9.29	0.309	4.418	0.8576	Medium	8.98	9.3	0.331	4.73	0.8411	Medium	8.98	9.3	0.493	7.05	0.8548	Medium	8.98	9.3	0.414	5.91	0.8523	Medium	8.98	9.29	0.477	6.816	0.8581	Medium	8.98	9.3	0.812	11.606	0.8497	Medium	8.98
APO	270	281	FVLRVCGRDEYL	11.19	3	10	11.4	11.65	0.253	2.532	0.9401	High	11.4	11.64	0.271	2.707	0.9325	High	11.41	11.65	0.289	2.887	0.9106	High	11.4	11.65	0.349	3.493	0.9341	High	11.4	11.65	0.339	3.388	0.9165	High	11.41	11.64	0.408	4.078	0.9262	High	11.4	11.65	0.782	7.825	0.9049	High	11.41
APO	273	281	RVCGRDEYL	8.04	3	7	7.85	8.22	0.206	2.939	0.7808	Medium	7.85	8.22	0.209	2.981	0.808	Medium	7.85	8.22	0.209	2.986	0.7931	Medium	7.85	8.22	0.289	4.132	0.7793	Medium	7.85	8.22	0.269	3.841	0.7317	Medium	7.85	8.22	0.382	5.457	0.7276	Medium	7.85	8.22	0.499	7.123	0.7812	Medium	7.85
APO	279	291	EYLVGETPIKNFQ	10.68	2	10	10.63	10.84	1.196	11.964	0.7478	Medium	10.63	10.84	1.246	12.459	0.7544	Medium	10.63	10.84	1.314	13.139	0.726	Medium	10.63	10.84	1.643	16.426	0.7482	Medium	10.63	10.84	1.591	15.906	0.7492	Medium	10.63	10.85	1.672	16.717	0.7638	Medium	10.63	10.84	1.663	16.627	0.7237	Medium	10.63
APO	282	291	VGETPIKNFQ	8.12	2	7	8.16	8.62	0.665	9.504	0.8853	Medium	8.16	8.61	0.698	9.978	0.88	Medium	8.17	8.62	0.685	9.788	0.8822	Medium	8.16	8.62	0.738	10.539	0.888	Medium	8.16	8.62	0.698	9.978	0.8742	Medium	8.16	8.62	0.738	10.54	0.8862	Medium	8.16	8.62	0.793	11.335	0.8411	Medium	8.16
APO	282	307	VGETPIKNFQWVRHCLKNGEEIHVVL	11.35	5	23	11.41	11.85	1.103	4.794	0.8834	Medium	11.41	11.85	1.131	4.918	0.8872	Medium	11.41	11.85	1.162	5.054	0.8654	Medium	11.41	11.85	3.125	13.586	0.8745	Medium	11.41	11.85	3.03	13.172	0.8696	Medium	11.42	11.84	3.279	14.255	0.8711	Medium	11.41	11.85	4.407	19.161	0.8671	Medium	11.41
APO	292	302	WVRHCLKNGEE	5.42	2	9	5.62	5.93	0.688	7.64	0.8391	Medium	5.61	5.92	0.711	7.899	0.8007	Medium	5.61	5.92	0.794	8.828	0.8317	Medium	5.62	5.93	1.922	21.355	0.87	Medium	5.61	5.92	1.916	21.285	0.8243	Medium	5.61	5.92	2.031	22.564	0.8595	Medium	5.61	5.92	2.327	25.86	0.8222	Medium	5.61
APO	292	307	WVRHCLKNGEEIHVVL	8.82	4	14	8.99	9.32	0.825	5.893	0.8822	Medium	9	9.32	0.874	6.242	0.8701	Medium	9	9.32	0.823	5.876	0.8371	Medium	8.99	9.32	2.561	18.293	0.8627	Medium	8.99	9.32	2.413	17.235	0.8501	Medium	9	9.32	2.51	17.926	0.8629	Medium	9	9.32	3.41	24.36	0.8379	Medium	9
APO	308	315	DTPPDPAL	8.44	1	3	8.5	8.93	0.598	19.924	0.8986	Medium	8.5	8.94	0.622	20.736	0.8994	Medium	8.5	8.94	0.642	21.412	0.8834	Medium	8.5	8.93	1.283	42.752	0.894	Medium	8.5	8.94	1.27	42.348	0.8867	Medium	8.77	8.85	1.328	44.255	0.7675	Medium	8.5	8.94	1.61	53.682	0.8818	Medium	8.5
APO	316	335	DEVRKEEWPLVDDCTGVTGY	12.57	2	17	12.68	12.96	6.167	36.279	0.8483	Medium	12.68	12.95	6.169	36.286	0.8437	Medium	12.68	12.96	6.195	36.439	0.8509	Medium	12.68	12.96	7.499	44.109	0.8705	Medium	12.68	12.95	7.384	43.438	0.8564	Medium	12.68	12.95	7.584	44.614	0.8702	Medium	12.68	12.96	8.6	50.591	0.8337	Medium	12.68
APO	316	339	DEVRKEEWPLVDDCTGVTGYHEQL	11.93	2	21	11.78	12.29	6.622	31.532	0.8865	High	11.78	12.28	6.667	31.745	0.8866	High	11.78	12.29	6.491	30.907	0.8548	Medium	11.78	12.29	8.39	39.951	0.8784	High	11.78	12.28	8.339	39.71	0.871	Medium	11.78	12.28	8.451	40.241	0.873	Medium	11.78	12.28	10.125	48.213	0.8507	Medium	11.78
APO	316	350	DEVRKEEWPLVDDCTGVTGYHEQLTIHGKDHESVF	11.04	5	32	11.23	11.56	6.865	21.454	0.8938	High	11.22	11.56	6.821	21.316	0.8929	High	11.23	11.56	6.726	21.019	0.8701	Medium	11.23	11.56	9.136	28.549	0.8838	High	11.23	11.56	8.932	27.912	0.8728	Medium	11.23	11.57	9.088	28.4	0.8628	Medium	11.23	11.56	11.7	36.564	0.8623	Medium	11.23
APO	336	350	HEQLTIHGKDHESVF	7.44	2	13	7.65	7.93	1.689	12.994	0.7626	Medium	7.65	7.93	1.753	13.483	0.7467	Medium	7.89	7.96	1.797	13.82	0.7482	Medium	7.65	7.93	2.946	22.663	0.7502	Medium	7.65	7.94	3.08	23.696	0.7026	Medium	7.65	7.93	3.048	23.448	0.7343	Medium	7.65	7.94	4.688	36.06	0.6897	Medium	7.65
APO	340	350	TIHGKDHESVF	6.78	2	9	6.91	7.2	1.288	14.316	0.8506	Medium	6.9	7.19	1.365	15.161	0.852	Medium	6.91	7.19	1.364	15.16	0.8322	Medium	6.91	7.19	1.954	21.709	0.8573	Medium	6.9	7.19	1.966	21.84	0.8333	Medium	6.9	7.19	2.014	22.377	0.8466	Medium	6.91	7.19	2.502	27.798	0.8492	Medium	6.91
APO	355	361	WDCDRKF	8.97	3	5	8.98	9.11	0.302	6.032	0.7837	Medium	8.99	9.12	0.387	7.746	0.8522	Medium	9.06	9.12	0.454	9.084	0.861	Medium	8.99	9.11	0.959	19.181	0.848	Medium	8.99	9.11	0.979	19.587	0.862	Medium	8.99	9.12	0.919	18.375	0.8322	Medium	8.99	9.11	1.502	30.03	0.7896	Medium	8.99
APO	355	379	WDCDRKFRVKIRGIDIPVLPRNTDL	10.5	4	21	10.66	10.72	2.747	13.08	0.6306	Medium	10.68	10.8	2.713	12.92	0.7636	Medium	10.68	10.8	2.647	12.603	0.6768	Medium	10.68	10.8	3.842	18.297	0.7018	Medium	10.68	10.8	3.697	17.604	0.7053	Medium	10.68	10.8	3.822	18.2	0.633	Medium	10.68	10.8	4.288	20.421	0.6637	Medium	10.68
APO	355	381	WDCDRKFRVKIRGIDIPVLPRNTDLTV	10.77	4	23	10.98	11.24	2.981	12.959	0.6387	Medium	10.98	11.23	3.051	13.265	0.6931	Medium	10.99	11.24	2.974	12.93	0.6336	Medium	10.98	11.24	4.378	19.033	0.6782	Medium	10.98	11.23	4.3	18.694	0.6705	Medium	10.99	11.24	4.402	19.14	0.6104	Medium	10.98	11.24	5.691	24.743	0.6284	Medium	10.99
APO	370	381	IPVLPRNTDLTV	10.11	2	9	10.41	10.52	3.535	39.275	0.8463	Medium	10.41	10.52	3.549	39.439	0.8678	Medium	10.42	10.52	3.494	38.826	0.8754	Medium	10.41	10.52	4.537	50.408	0.8961	Medium	10.41	10.52	4.412	49.023	0.8976	Medium	10.42	10.53	4.474	49.715	0.8593	Medium	10.41	10.52	5.385	59.829	0.8389	Medium	10.41
APO	380	394	TVFVEANIQHGQQVL	10.36	2	13	10.45	10.6	1.07	8.228	0.784	Medium	10.44	10.6	1.134	8.719	0.8397	Medium	10.45	10.6	1.06	8.151	0.7935	Medium	10.45	10.6	1.399	10.764	0.7873	Medium	10.45	10.6	1.428	10.984	0.82	Medium	10.45	10.6	1.488	11.444	0.7293	Medium	10.45	10.6	1.58	12.157	0.7767	Medium	10.45
APO	382	394	FVEANIQHGQQVL	9.2	2	11	9.35	9.58	1.221	11.104	0.9338	Medium	9.34	9.58	1.268	11.525	0.9341	High	9.35	9.58	1.263	11.483	0.9306	Medium	9.35	9.58	1.97	17.908	0.9268	High	9.35	9.58	1.923	17.483	0.9296	High	9.34	9.59	2.012	18.289	0.9135	Medium	9.35	9.58	2.092	19.017	0.9083	Medium	9.35
APO	383	394	VEANIQHGQQVL	7.96	2	10	8.12	8.35	1.304	13.041	0.9276	High	8.12	8.35	1.363	13.629	0.9182	High	8.12	8.36	1.333	13.333	0.9095	Medium	8.12	8.35	2.256	22.563	0.9275	High	8.12	8.36	2.222	22.218	0.9202	High	8.12	8.35	2.291	22.911	0.9206	High	8.12	8.36	2.482	24.822	0.9123	Medium	8.12
APO	386	394	NIQHGQQVL	7.43	1	7	7.46	7.59	1.263	18.043	0.7527	Medium	7.46	7.59	1.294	18.49	0.7286	Medium	7.59	7.65	1.392	19.879	0.7416	Medium	7.46	7.59	2.012	28.741	0.6843	Medium	7.57	7.64	2.093	29.901	0.781	Medium	7.46	7.59	2.025	28.929	0.6599	Medium	7.55	7.64	2.152	30.739	0.7241	Medium	7.46
APO	395	406	CQRRTSPKPFTE	5.38	2	8	5.51	5.55	1.159	14.488	0.8332	Medium	5.56	5.63	1.152	14.405	0.8963	Medium	5.57	5.64	1.169	14.607	0.8411	Medium	5.51	5.55	1.759	21.993	0.8089	Medium	5.51	5.54	1.685	21.064	0.7189	Medium	5.51	5.54	1.763	22.036	0.756	Medium	5.58	5.65	2.371	29.643	0.8311	Medium	5.51
APO	408	413	VLWNVW	14.34	1	4	14.55	14.72	0.394	9.854	0.8827	Medium	14.55	14.72	0.438	10.952	0.8847	Medium	14.55	14.72	0.402	10.044	0.877	Medium	14.55	14.72	1.186	29.642	0.8966	Medium	14.55	14.72	1.172	29.309	0.8916	Medium	14.55	14.72	1.173	29.328	0.8716	Medium	14.55	14.72	1.645	41.137	0.8607	Medium	14.55
APO	414	428	LEFSIKIKDLPKGAL	10.7	3	12	10.93	11.12	0.823	6.859	0.876	Medium	10.93	11.12	0.833	6.941	0.8808	Medium	10.94	11.12	0.8	6.666	0.8437	Medium	10.93	11.12	0.954	7.951	0.8823	Medium	10.93	11.12	0.929	7.743	0.8696	Medium	10.93	11.12	0.923	7.691	0.8117	Medium	10.93	11.12	1.555	12.96	0.8041	Medium	10.94
APO	417	428	SIKIKDLPKGAL	8.23	3	9	8.44	8.68	0.197	2.187	0.943	High	8.44	8.68	0.196	2.175	0.9358	High	8.44	8.69	0.243	2.702	0.9096	High	8.44	8.68	0.253	2.809	0.9375	High	8.44	8.68	0.271	3.008	0.9192	High	8.44	8.69	0.313	3.475	0.9252	High	8.44	8.68	0.414	4.603	0.9204	High	8.44
APO	417	429	SIKIKDLPKGALL	9.67	3	10	9.63	9.67	0.219	2.192	0.8927	Medium	9.64	9.67	0.223	2.229	0.8974	Medium	9.63	9.67	0.28	2.796	0.856	Medium	9.63	9.67	0.32	3.2	0.8772	Medium	9.63	9.67	0.335	3.348	0.8869	Medium	9.64	9.67	0.334	3.34	0.8892	Medium	9.63	9.67	0.437	4.369	0.8184	Medium	9.63
APO	432	441	QIYCGKAPAL	9.16	1	7	9.38	9.43	3.177	45.39	0.7902	Medium	9.43	9.5	3.178	45.398	0.8032	Medium	9.43	9.5	3.252	46.456	0.78	Medium	9.38	9.43	3.526	50.366	0.7967	Medium	9.42	9.49	3.374	48.205	0.8027	Medium	9.39	9.44	3.45	49.291	0.7376	Medium	9.38	9.43	3.835	54.786	0.6808	Medium	9.38
APO	461	467	LYYVNLL	14.24	2	5	14.11	14.33	0.047	0.941	0.7799	Medium	14.11	14.33	0.066	1.324	0.754	Medium	14.12	14.33	0.034	0.684	0.7306	Medium	14.12	14.34	0.074	1.476	0.7437	Medium	14.11	14.33	0.049	0.981	0.766	Medium	14.11	14.33	0.139	2.776	0.7219	Medium	14.12	14.33	0.369	7.383	0.6469	Medium	14.12
APO	463	468	YVNLLL	13.46	1	4	13.78	13.82	0.085	2.124	0.8332	Medium	13.78	13.82	0.049	1.223	0.8166	Medium	13.79	13.82	0.046	1.149	0.6649	Medium	13.79	13.82	0.092	2.297	0.8568	Medium	13.78	13.82	0.192	4.808	0.7586	Medium	13.78	13.82	0.164	4.1	0.8216	Medium	13.79	13.82	0.322	8.054	0.6627	Medium	13.79
APO	467	475	LLIDHRFLL	12.02	3	7	12.39	12.46	0.128	1.832	0.7971	Medium	12.43	12.5	0.105	1.493	0.8589	Medium	12.38	12.47	0.153	2.182	0.7934	Medium	12.38	12.47	0.139	1.992	0.8863	Medium	12.37	12.47	0.101	1.444	0.8842	Medium	12.37	12.47	0.168	2.396	0.8237	Medium	12.38	12.47	0.223	3.185	0.7348	Medium	12.38
APO	467	479	LLIDHRFLLRRGE	9	4	11	9.35	9.43	0.357	3.25	0.9238	High	9.34	9.44	0.374	3.403	0.9348	High	9.35	9.43	0.433	3.938	0.8702	Medium	9.35	9.43	0.971	8.829	0.9254	High	9.35	9.43	0.963	8.758	0.9107	High	9.34	9.44	1.02	9.272	0.9146	High	9.35	9.43	1.244	11.307	0.832	Medium	9.35
APO	467	480	LLIDHRFLLRRGEY	9.59	4	12	9.82	10.09	0.38	3.165	0.9093	Medium	9.81	10.08	0.406	3.381	0.9205	Medium	9.82	10.09	0.438	3.65	0.9058	Medium	9.82	10.09	1.004	8.369	0.9274	Medium	9.82	10.08	0.95	7.919	0.9236	Medium	9.82	10.09	1.199	9.992	0.9003	Medium	9.82	10.09	1.321	11.011	0.8967	Medium	9.82
APO	485	497	WQISGKGEDQGSF	9.8	2	11	10.17	10.25	6.403	58.209	0.7819	Medium	10.17	10.24	6.572	59.744	0.7994	Medium	10.31	10.37	6.344	57.67	0.7407	Medium	10.17	10.25	6.849	62.262	0.8271	Medium	10.17	10.24	6.565	59.686	0.8259	Medium	10.17	10.25	6.704	60.942	0.7911	Medium	10.17	10.25	7.266	66.052	0.7969	Medium	10.17
APO	498	513	NADKLTSATNPDKENS	5.28	2	13	5.5	5.6	2.456	18.894	0.8013	Medium	5.49	5.59	2.582	19.863	0.8148	Medium	5.5	5.6	2.595	19.961	0.7439	Medium	5.5	5.6	3.863	29.716	0.7948	Medium	5.49	5.59	3.85	29.613	0.8146	Medium	5.49	5.59	4.033	31.022	0.7407	Medium	5.66	5.74	4.976	38.277	0.6677	Medium	5.49
APO	498	514	NADKLTSATNPDKENSM	6.42	3	14	6.63	6.8	2.565	18.324	0.8006	Medium	6.63	6.79	2.737	19.551	0.8162	Medium	6.63	6.8	2.696	19.26	0.7735	Medium	6.63	6.8	4.251	30.362	0.8196	Medium	6.63	6.8	4.114	29.386	0.787	Medium	6.62	6.79	4.323	30.876	0.7475	Medium	6.63	6.8	5.581	39.862	0.722	Medium	6.63
APO	498	515	NADKLTSATNPDKENSMS	6.15	3	15	6.26	6.55	2.573	17.151	0.9242	High	6.26	6.54	2.658	17.72	0.9338	High	6.26	6.55	2.704	18.03	0.9204	High	6.26	6.55	4.245	28.3	0.9274	High	6.26	6.54	4.166	27.77	0.9274	High	6.26	6.54	4.389	29.258	0.917	High	6.26	6.55	5.57	37.135	0.9138	High	6.26
APO	498	517	NADKLTSATNPDKENSMSIS	7.37	3	17	7.59	7.67	2.371	13.948	0.8604	Medium	7.59	7.67	2.552	15.01	0.8909	Medium	7.59	7.67	2.49	14.646	0.8434	Medium	7.59	7.67	3.998	23.517	0.8624	Medium	7.59	7.67	3.837	22.571	0.8497	Medium	7.59	7.67	3.957	23.275	0.8078	Medium	7.59	7.67	5.028	29.577	0.7964	Medium	7.59
APO	498	519	NADKLTSATNPDKENSMSISIL	10.59	3	19	10.86	10.97	1.982	10.429	0.8232	Medium	10.86	10.96	1.984	10.44	0.8302	Medium	10.86	10.97	1.975	10.397	0.7354	Medium	10.86	10.97	3.107	16.355	0.7747	Medium	10.86	10.97	2.926	15.402	0.7547	Medium	10.86	10.96	3.131	16.48	0.7542	Medium	10.86	10.97	3.901	20.532	0.7107	Medium	10.86
APO	520	551	LDNYCHPIALPKHQPTPDPEGDRVRAEMPNQL	8.94	4	24	9.05	9.19	9.187	38.278	0.8406	Medium	9.06	9.18	9.394	39.141	0.8381	Medium	9.06	9.19	9.198	38.324	0.7677	Medium	9.05	9.19	10.679	44.495	0.8438	Medium	9.05	9.19	10.446	43.527	0.8125	Medium	9.06	9.18	10.632	44.3	0.8309	Medium	9.16	9.24	11.414	47.557	0.8146	Medium	9.05
APO	552	557	RKQLEA	4.4	2	4	4.25	4.69	0.453	11.315	0.9184	High	4.24	4.69	0.505	12.623	0.9037	High	4.24	4.69	0.542	13.551	0.8819	High	4.41	4.48	0.897	22.421	0.9384	High	4.44	4.52	0.826	20.66	0.9359	High	4.43	4.51	0.888	22.212	0.9216	High	4.24	4.69	1.496	37.411	0.9007	High	4.24
APO	557	575	AIIATDPLNPLTAEDKELL	12.88	2	15	12.82	12.89	2.722	18.145	0.7056	Medium	12.81	12.89	2.774	18.492	0.6772	Medium	12.82	12.89	2.871	19.142	0.6264	Medium	12.82	12.89	4.227	28.181	0.6999	Medium	12.86	12.93	4.021	26.809	0.7016	Medium	12.81	12.89	4.271	28.474	0.7073	Medium	12.81	12.89	6.74	44.935	0.5667	Medium	12.82
APO	557	578	AIIATDPLNPLTAEDKELLWHF	13.73	3	18	13.99	14	2.632	14.621	0.7564	Medium	13.99	14	2.586	14.367	0.7193	Medium	14	14.01	2.659	14.771	0.6754	Medium	14	14.01	3.987	22.148	0.7036	Medium	13.99	14	3.939	21.886	0.6566	Medium	13.99	14	3.858	21.433	0.6754	Medium	14	14.01	6.28	34.888	0.5818	Medium	14
APO	558	570	IIATDPLNPLTAE	11.61	1	9	11.84	11.93	2.849	31.654	0.793	Medium	11.84	11.92	2.949	32.765	0.8857	Medium	11.84	11.93	2.969	32.986	0.8559	Medium	11.84	11.93	4.249	47.207	0.8474	Medium	11.84	11.92	4.172	46.351	0.8624	Medium	11.84	11.92	4.207	46.74	0.8726	Medium	11.84	11.92	6.282	69.803	0.815	Medium	11.84
APO	558	573	IIATDPLNPLTAEDKE	10.45	2	12	10.81	10.89	2.94	24.499	0.846	Medium	10.81	10.89	3.003	25.023	0.8508	Medium	10.81	10.89	3.006	25.047	0.8517	Medium	10.81	10.89	4.327	36.054	0.8613	Medium	10.81	10.89	4.183	34.855	0.8616	Medium	10.8	10.9	4.305	35.875	0.8562	Medium	10.81	10.89	6.43	53.58	0.8311	Medium	10.81
APO	558	578	IIATDPLNPLTAEDKELLWHF	13.76	3	17	14.03	14.14	2.554	15.023	0.8801	Medium	14.03	14.14	2.598	15.285	0.8818	Medium	14.03	14.14	2.692	15.838	0.8811	Medium	14.03	14.14	3.881	22.83	0.8721	Medium	14.03	14.14	3.658	21.519	0.8756	Medium	14.03	14.14	3.822	22.48	0.8656	Medium	14.03	14.14	5.95	34.999	0.8575	Medium	14.03
APO	558	580	IIATDPLNPLTAEDKELLWHFRY	13.18	4	19	13.1	13.14	2.588	13.621	0.8373	Medium	13.1	13.14	2.62	13.787	0.8571	Medium	13.1	13.14	2.782	14.641	0.8533	Medium	13.1	13.14	4.03	21.211	0.8304	Medium	13.1	13.14	4.063	21.387	0.8568	Medium	13.1	13.14	4.225	22.235	0.8416	Medium	13.1	13.14	6.691	35.213	0.81	Medium	13.1
APO	579	592	RYESLKHPKAYPKL	6.31	4	10	6.23	6.82	0.31	3.104	0.9161	Medium	6.22	6.81	0.333	3.33	0.9078	Medium	6.23	6.81	0.356	3.559	0.9027	Medium	6.23	6.82	1.055	10.553	0.9191	Medium	6.22	6.81	1.001	10.015	0.9096	Medium	6.22	6.81	1.126	11.265	0.9153	Medium	6.23	6.81	2.108	21.077	0.9064	Medium	6.23
APO	593	601	FSSVKWGQQ	8.89	1	7	9.06	9.26	0.394	5.626	0.841	Medium	9.07	9.26	0.381	5.439	0.8358	Medium	9.06	9.27	0.488	6.967	0.8324	Medium	9.06	9.26	0.998	14.251	0.8408	Medium	9.14	9.22	0.856	12.233	0.8311	Medium	9.07	9.27	0.973	13.904	0.8352	Medium	9.12	9.21	2.529	36.124	0.7814	Medium	9.16
APO	593	605	FSSVKWGQQEIVA	10.39	2	11	10.57	10.87	0.824	7.492	0.8468	Medium	10.57	10.86	0.869	7.902	0.8623	Medium	10.57	10.87	0.833	7.568	0.8366	Medium	10.57	10.87	1.476	13.422	0.8379	Medium	10.57	10.87	1.411	12.827	0.8261	Medium	10.58	10.87	1.52	13.822	0.8221	Medium	10.57	10.87	2.959	26.899	0.815	Medium	10.57
APO	593	610	FSSVKWGQQEIVAKTYQL	10.78	2	16	10.99	11.08	0.812	5.077	0.8647	Medium	10.99	11.07	0.829	5.184	0.8531	Medium	10.99	11.08	0.933	5.832	0.8085	Medium	10.99	11.08	1.582	9.89	0.7874	Medium	10.99	11.07	1.523	9.521	0.8022	Medium	11	11.08	1.539	9.621	0.8162	Medium	10.99	11.08	3.31	20.689	0.7377	Medium	10.99
APO	593	611	FSSVKWGQQEIVAKTYQLL	12.25	3	17	12.56	12.65	0.66	3.884	0.84	Medium	12.55	12.64	0.631	3.714	0.8689	Medium	12.56	12.65	0.674	3.966	0.8664	Medium	12.56	12.65	1.275	7.501	0.8354	Medium	12.55	12.64	1.34	7.881	0.8407	Medium	12.55	12.64	1.335	7.852	0.8285	Medium	12.55	12.65	3.018	17.753	0.8079	Medium	12.56
APO	602	607	EIVAKT	4.54	1	4	4.87	5.04	0.093	2.331	0.9021	Medium	4.86	5.03	0.102	2.558	0.8999	Medium	4.87	5.03	0.108	2.704	0.9001	Medium	4.87	5.04	0.15	3.748	0.8943	Medium	4.86	5.03	0.233	5.831	0.9035	Medium	4.86	5.03	0.269	6.722	0.9178	Medium	4.87	5.03	0.487	12.172	0.9033	Medium	4.86
APO	606	611	KTYQLL	9.74	2	4	10.12	10.19	0.129	3.217	0.8337	Medium	10.13	10.22	0.131	3.269	0.8231	Medium	10.14	10.22	0.121	3.026	0.7655	Medium	10.14	10.22	0.356	8.911	0.8349	Medium	10.18	10.25	0.404	10.106	0.8492	Medium	10.14	10.22	0.356	8.899	0.8284	Medium	10.2	10.28	0.805	20.133	0.8294	Medium	10.14
APO	611	622	LARREVWDQSAL	9.42	2	10	9.6	9.83	5.982	59.818	0.876	Medium	9.6	9.83	6.086	60.858	0.8688	Medium	9.6	9.84	5.98	59.802	0.8696	Medium	9.6	9.83	6.612	66.117	0.8751	Medium	9.6	9.83	6.461	64.613	0.8632	Medium	9.6	9.84	6.532	65.322	0.8723	Medium	9.6	9.83	6.543	65.425	0.8685	Medium	9.6
APO	612	622	ARREVWDQSAL	9.21	3	9	9.46	9.56	5.558	61.753	0.8705	Medium	9.46	9.56	5.617	62.417	0.8359	Medium	9.57	9.64	5.487	60.962	0.8505	Medium	9.46	9.56	5.932	65.916	0.8449	Medium	9.46	9.56	5.78	64.223	0.8537	Medium	9.47	9.56	5.967	66.299	0.8639	Medium	9.47	9.56	5.869	65.207	0.8464	Medium	9.47
APO	623	630	DVGLTMQL	12.15	1	6	12.35	12.43	0.369	6.157	0.8547	Medium	12.36	12.43	0.277	4.617	0.8486	Medium	12.44	12.5	0.29	4.831	0.8438	Medium	12.35	12.43	0.906	15.106	0.8927	Medium	12.34	12.43	0.962	16.032	0.9015	Medium	12.34	12.42	1.043	17.389	0.8873	Medium	12.34	12.43	1.328	22.135	0.8507	Medium	12.35
APO	623	631	DVGLTMQLL	13.61	2	7	13.9	13.98	0.352	5.033	0.8133	Medium	13.9	13.99	0.362	5.174	0.8331	Medium	13.91	13.99	0.383	5.469	0.816	Medium	13.91	13.99	0.851	12.158	0.8079	Medium	13.9	13.99	0.803	11.465	0.8201	Medium	13.9	13.99	0.798	11.396	0.8261	Medium	13.91	13.99	1.234	17.633	0.8018	Medium	13.91
APO	631	635	LDCNF	10.77	1	3	10.96	11.19	0.156	5.195	0.8707	Medium	10.96	11.18	0.154	5.147	0.8717	Medium	10.96	11.19	0.164	5.467	0.8753	Medium	10.96	11.19	0.396	13.21	0.8899	Medium	10.96	11.18	0.379	12.622	0.8865	Medium	10.96	11.19	0.433	14.432	0.8837	Medium	10.96	11.19	1.227	40.909	0.8943	Medium	10.96
APO	636	642	SDENVRA	4.38	1	5	4.64	4.74	0.511	10.228	0.9394	High	4.64	4.74	0.551	11.011	0.9415	High	4.64	4.74	0.582	11.642	0.9124	Medium	4.64	4.74	0.654	13.075	0.9413	Medium	4.64	4.74	0.66	13.201	0.9301	Medium	4.64	4.74	0.713	14.251	0.9399	Medium	4.64	4.74	0.941	18.814	0.9217	Medium	4.64
APO	643	657	IAVQKLESLEDDDVL	11.41	2	13	11.66	11.74	1.662	12.787	0.8373	Medium	11.65	11.74	1.645	12.652	0.8604	Medium	11.66	11.74	1.586	12.198	0.8439	Medium	11.66	11.74	2.275	17.503	0.8367	Medium	11.65	11.74	2.221	17.081	0.867	Medium	11.65	11.74	2.336	17.972	0.8341	Medium	11.66	11.74	2.758	21.216	0.8287	Medium	11.66
APO	643	662	IAVQKLESLEDDDVLHYLLQ	13.55	3	18	13.64	13.93	1.152	6.401	0.8457	Medium	13.63	13.93	1.215	6.749	0.8525	Medium	13.64	13.94	1.204	6.688	0.828	Medium	13.64	13.94	1.866	10.366	0.8251	Medium	13.63	13.94	1.909	10.605	0.83	Medium	13.63	13.94	1.855	10.304	0.8177	Medium	13.64	13.94	2.891	16.058	0.7601	Medium	13.64
APO	643	663	IAVQKLESLEDDDVLHYLLQL	14.29	3	19	14.3	14.46	0.912	4.798	0.7672	Medium	14.3	14.46	1.026	5.401	0.7893	Medium	14.3	14.46	0.921	4.849	0.7794	Medium	14.3	14.46	1.747	9.192	0.7702	Medium	14.3	14.46	1.652	8.694	0.7765	Medium	14.3	14.46	1.633	8.596	0.7555	Medium	14.3	14.46	2.813	14.807	0.7354	Medium	14.3
APO	651	663	LEDDDVLHYLLQL	14.41	3	11	14.49	14.52	0.138	1.254	0.8096	Medium	14.49	14.52	0.134	1.219	0.8357	Medium	14.49	14.53	0.02	0.18	0.7638	Medium	14.5	14.52	0.207	1.882	0.794	Medium	14.49	14.52	0.22	2.003	0.7292	Medium	14.49	14.52	0.282	2.568	0.7655	Medium	14.49	14.53	1.242	11.288	0.7146	Medium	14.49
APO	652	662	EDDDVLHYLLQ	13.33	2	9	13.51	13.56	0.386	4.283	0.6703	Medium	13.51	13.55	0.274	3.047	0.7012	Medium	13.51	13.55	0.182	2.017	0.6328	Medium	13.51	13.55	0.406	4.512	0.6713	Medium	13.51	13.55	0.416	4.618	0.6796	Medium	13.51	13.55	0.512	5.684	0.6977	Medium	13.51	13.55	1.184	13.158	0.6129	Medium	13.51
APO	652	663	EDDDVLHYLLQL	14.38	2	10	14.4	14.49	0.538	5.377	0.6499	Medium	14.4	14.49	0.42	4.204	0.648	Medium	14.5	14.57	0.437	4.369	0.6746	Medium	14.41	14.5	0.625	6.249	0.6557	Medium	14.4	14.49	0.668	6.677	0.6364	Medium	14.41	14.49	0.625	6.251	0.6423	Medium	14.41	14.49	1.355	13.546	0.5491	Medium	14.41
APO	654	662	DDVLHYLLQ	12.98	2	7	13.36	13.37	0.186	2.659	0.8265	Medium	13.36	13.36	0.049	0.705	0.847	Medium	13.36	13.37	0.143	2.039	0.8462	Medium	13.36	13.37	0.183	2.612	0.8176	Medium	13.36	13.36	0.188	2.688	0.8309	Medium	13.36	13.36	0.252	3.602	0.8214	Medium	13.36	13.37	1.072	15.308	0.7982	Medium	13.28
APO	655	662	DVLHYLLQ	12.82	2	6	13	13.32	0.174	2.893	0.8825	Medium	13	13.31	0.081	1.347	0.8795	Medium	13	13.32	0.094	1.565	0.8732	Medium	13	13.32	0.291	4.858	0.8853	Medium	13	13.31	0.238	3.969	0.8812	Medium	13	13.31	0.265	4.425	0.87	Medium	13	13.32	1.079	17.978	0.8439	Medium	13
APO	655	663	DVLHYLLQL	14.29	2	7	14.4	14.77	0.088	1.251	0.9435	Medium	14.4	14.77	0.113	1.611	0.9169	Medium	14.41	14.77	0.098	1.402	0.9417	Medium	14.41	14.77	0.254	3.624	0.9072	Medium	14.4	14.77	0.221	3.158	0.9445	Medium	14.41	14.77	0.288	4.116	0.9294	Medium	14.41	14.77	1.172	16.738	0.9261	Medium	14.41
APO	658	663	HYLLQL	11.99	1	4	11.97	12.22	0.049	1.236	0.8159	Medium	11.96	12.21	0.054	1.344	0.7841	Medium	11.97	12.22	0.032	0.794	0.7304	Medium	11.97	12.22	0.116	2.897	0.8244	Medium	11.96	12.22	0.091	2.265	0.7673	Medium	11.96	12.21	0.144	3.588	0.8195	Medium	11.97	12.22	0.522	13.038	0.6644	Medium	11.97
APO	663	677	LVQAVKFEPYHDSAL	9.69	3	12	10.1	10.14	0.278	2.313	0.8563	Medium	10.1	10.13	0.315	2.626	0.8543	Medium	10.1	10.14	0.383	3.19	0.859	Medium	10.1	10.14	0.765	6.378	0.8728	Medium	10.1	10.14	0.737	6.144	0.8629	Medium	10.11	10.14	0.838	6.987	0.8628	Medium	10.1	10.14	0.997	8.308	0.863	Medium	10.1
APO	664	677	VQAVKFEPYHDSAL	9.26	2	11	9.43	9.67	0.336	3.051	0.9132	Medium	9.44	9.68	0.351	3.194	0.9243	Medium	9.43	9.68	0.39	3.549	0.9315	Medium	9.43	9.67	0.832	7.563	0.924	Medium	9.43	9.67	0.782	7.111	0.9201	Medium	9.44	9.68	0.9	8.186	0.9006	Medium	9.43	9.67	0.964	8.768	0.8999	Medium	9.43
APO	666	677	AVKFEPYHDSAL	8.99	2	9	9.2	9.25	0.331	3.678	0.8524	Medium	9.2	9.26	0.353	3.922	0.8362	Medium	9.21	9.26	0.367	4.08	0.7799	Medium	9.2	9.25	0.821	9.125	0.8508	Medium	9.2	9.25	0.813	9.03	0.8221	Medium	9.21	9.26	0.864	9.596	0.8487	Medium	9.21	9.26	0.999	11.105	0.7944	Medium	9.21
APO	681	697	LLKRGLRNKRIGHFLFW	10.28	5	15	10.55	10.78	0.111	0.743	0.88	Medium	10.54	10.78	0.097	0.646	0.8859	Medium	10.55	10.78	0.106	0.705	0.871	Medium	10.55	10.78	0.117	0.777	0.8704	Medium	10.55	10.78	0.075	0.497	0.869	Medium	10.55	10.78	0.127	0.843	0.8633	Medium	10.55	10.78	0.21	1.401	0.8364	Medium	10.55
APO	698	713	FLRSEIAQSRHYQQRF	7.69	4	14	7.76	8.19	0.683	4.878	0.838	Medium	7.76	8.19	0.683	4.876	0.8267	Medium	7.76	8.19	0.674	4.813	0.7982	Medium	7.76	8.19	1.019	7.276	0.8239	Medium	7.76	8.19	0.985	7.038	0.8033	Medium	7.76	8.19	1.09	7.785	0.8244	Medium	7.76	8.19	2.231	15.939	0.8156	Medium	7.76
APO	700	713	RSEIAQSRHYQQRF	5.94	4	12	6.07	6.35	0.478	3.982	0.924	High	6.06	6.34	0.48	4	0.9265	High	6.07	6.34	0.514	4.28	0.9357	High	6.07	6.35	0.787	6.558	0.9283	High	6.06	6.34	0.764	6.363	0.9299	High	6.06	6.34	0.829	6.91	0.9287	Medium	6.07	6.34	1.864	15.535	0.9197	Medium	6.07
APO	704	713	AQSRHYQQRF	6.13	3	8	6.14	6.18	0.558	6.97	0.7945	Medium	6.13	6.17	0.481	6.011	0.7753	Medium	6.13	6.18	0.501	6.262	0.728	Medium	6.14	6.18	0.69	8.627	0.8233	Medium	6.13	6.17	0.786	9.822	0.7375	Medium	6.13	6.17	0.794	9.919	0.7737	Medium	6.13	6.18	1.466	18.321	0.7148	Medium	6.13
APO	714	719	AVILEA	9.26	1	4	9.51	9.58	0.032	0.811	0.8131	Medium	9.52	9.58	0.038	0.961	0.8019	Medium	9.52	9.58	0.004	0.102	0.6843	Medium	9.51	9.58	0.043	1.082	0.7966	Medium	9.51	9.58	0.006	0.146	0.7786	Medium	9.52	9.59	0.067	1.663	0.801	Medium	9.52	9.58	0.009	0.228	0.7675	Medium	9.52
APO	720	729	YLRGCGTAML	9.99	2	8	10.43	10.55	0.258	3.228	0.8522	Medium	10.43	10.54	0.276	3.449	0.8743	Medium	10.43	10.55	0.25	3.131	0.8911	Medium	10.43	10.55	0.785	9.813	0.8471	Medium	10.43	10.55	0.681	8.517	0.8804	Medium	10.43	10.55	0.747	9.34	0.8735	Medium	10.43	10.55	1.295	16.184	0.8412	Medium	10.43
APO	729	738	LHDFTQQVQV	9.15	2	8	9.38	9.51	0.123	1.538	0.8141	Medium	9.39	9.51	0.116	1.449	0.8258	Medium	9.38	9.51	0.161	2.01	0.778	Medium	9.38	9.51	0.17	2.127	0.7916	Medium	9.38	9.51	0.139	1.736	0.7998	Medium	9.39	9.51	0.212	2.656	0.8147	Medium	9.38	9.51	0.141	1.767	0.7654	Medium	9.38
APO	730	737	HDFTQQVQ	6.37	1	6	6.62	6.78	0.076	1.267	0.7589	Medium	6.61	6.77	0.182	3.032	0.7497	Medium	6.61	6.77	0.162	2.692	0.6695	Medium	6.62	6.77	0.11	1.833	0.7231	Medium	6.61	6.77	0.116	1.938	0.7115	Medium	6.61	6.77	0.243	4.053	0.6852	Medium	6.61	6.77	0.085	1.415	0.656	Medium	6.61
APO	730	738	HDFTQQVQV	8.35	2	7	8.5	8.73	0.208	2.974	0.8017	Medium	8.5	8.73	0.113	1.619	0.8063	Medium	8.5	8.74	0.171	2.444	0.781	Medium	8.5	8.73	0.195	2.784	0.815	Medium	8.5	8.73	0.12	1.716	0.8002	Medium	8.5	8.74	0.227	3.237	0.8127	Medium	8.5	8.74	0.143	2.043	0.8016	Medium	8.5
APO	732	737	FTQQVQ	5.59	1	4	5.85	5.92	0.073	1.821	0.797	Medium	5.85	5.87	0.157	3.915	0.7481	Medium	5.86	5.87	0.158	3.956	0.6824	Medium	5.86	5.88	0.083	2.081	0.7289	Medium	5.86	5.87	0.069	1.713	0.6537	Medium	5.85	5.87	0.163	4.064	0.7143	Medium	5.86	5.87	0.126	3.143	0.7108	Medium	5.86
APO	736	741	VQVIEM	10.7	1	4	10.6	10.65	0.092	2.288	0.6391	Medium	10.6	10.65	0.064	1.607	0.5935	Medium	10.6	10.65	0.091	2.272	0.5046	Medium	10.6	10.65	0.097	2.43	0.6019	Medium	10.6	10.65	0.091	2.286	0.5695	Medium	10.6	10.64	0.108	2.698	0.6272	Medium	10.6	10.65	0.112	2.79	0.5698	Medium	10.6
APO	741	747	MLQKVTL	9.12	2	5	9.32	9.4	0.393	7.857	0.8668	Medium	9.32	9.41	0.354	7.071	0.8755	Medium	9.32	9.41	0.282	5.641	0.7805	Medium	9.32	9.4	1.131	22.629	0.8666	Medium	9.46	9.53	1.026	20.518	0.7105	Medium	9.32	9.41	1.161	23.217	0.8733	Medium	9.32	9.41	2.217	44.337	0.816	Medium	9.32
APO	742	747	LQKVTL	8.23	1	4	8.51	8.7	0.264	6.597	0.9473	Medium	8.51	8.7	0.282	7.039	0.9484	Medium	8.52	8.7	0.288	7.197	0.9505	Medium	8.51	8.7	1.097	27.437	0.9401	Medium	8.52	8.7	1.017	25.425	0.9503	Medium	8.51	8.71	1.071	26.78	0.9552	Medium	8.52	8.7	2.158	53.945	0.9389	Medium	8.52
APO	742	782	LQKVTLDIKSLSAEKYDVSSQVISQLKQKLENLQNSQLPES	12.36	5	38	12.6	12.86	18.276	48.094	0.7775	Medium	12.59	12.85	18.333	48.245	0.7918	Medium	12.6	12.86	18.297	48.149	0.7548	Medium	12.6	12.86	23.808	62.652	0.7565	Medium	12.59	12.85	23.732	62.452	0.7499	Medium	12.59	12.85	24.134	63.511	0.7383	Medium	12.6	12.86	26.972	70.979	0.7404	Medium	12.6
APO	748	761	DIKSLSAEKYDVSS	8	2	12	8.15	8.5	9.1	75.834	0.7963	Medium	8.15	8.5	9.217	76.812	0.7796	Medium	8.16	8.5	9.064	75.535	0.7223	Medium	8.15	8.5	9.295	77.462	0.7885	Medium	8.15	8.5	9.2	76.665	0.752	Medium	8.15	8.5	9.358	77.98	0.7749	Medium	8.31	8.38	9.131	76.094	0.8427	Medium	8.16
APO	748	767	DIKSLSAEKYDVSSQVISQL	11.14	3	18	11.31	11.4	13.796	76.646	0.9122	High	11.31	11.4	13.956	77.532	0.9094	High	11.31	11.41	13.958	77.542	0.9094	High	11.31	11.4	14.066	78.146	0.9092	High	11.31	11.4	14.085	78.249	0.8919	High	11.31	11.41	13.964	77.577	0.9112	High	11.31	11.4	14.134	78.522	0.8855	Medium	11.31
APO	748	782	DIKSLSAEKYDVSSQVISQLKQKLENLQNSQLPES	12.56	5	32	12.54	13.05	17.928	56.026	0.8969	Medium	12.53	13.05	17.949	56.09	0.9045	High	12.54	13.05	17.801	55.627	0.9016	High	12.54	13.05	22.684	70.888	0.8996	High	12.53	13.05	22.387	69.959	0.8991	High	12.53	13.05	22.854	71.418	0.9002	High	12.54	13.05	25.002	78.131	0.9006	High	12.54
APO	755	782	EKYDVSSQVISQLKQKLENLQNSQLPES	12.25	3	25	12.35	12.45	12.886	51.546	0.8343	Medium	12.34	12.44	13.103	52.411	0.8368	Medium	12.35	12.45	12.98	51.919	0.7562	Medium	12.35	12.45	17.86	71.439	0.8788	Medium	12.34	12.44	17.593	70.374	0.8972	Medium	12.34	12.44	17.7	70.799	0.8203	Medium	12.34	12.44	20.089	80.357	0.778	Medium	12.35
APO	762	767	QVISQL	9.32	1	4	9.56	9.6	3.231	80.78	0.7505	Medium	9.57	9.6	3.298	82.438	0.7634	Medium	9.59	9.66	3.249	81.218	0.7777	Medium	9.56	9.6	3.452	86.311	0.7933	Medium	9.56	9.6	3.393	84.831	0.7854	Medium	9.57	9.6	3.347	83.685	0.802	Medium	9.57	9.6	3.382	84.561	0.7616	Medium	9.57
APO	762	782	QVISQLKQKLENLQNSQLPES	10.6	3	18	10.72	10.81	8.615	47.859	0.7426	Medium	10.71	10.81	8.805	48.916	0.749	Medium	10.72	10.81	8.679	48.219	0.7351	Medium	10.72	10.81	13.584	75.468	0.7275	Medium	10.71	10.81	13.495	74.972	0.7297	Medium	10.71	10.8	13.288	73.822	0.7099	Medium	10.72	10.81	15.886	88.256	0.7337	Medium	10.72
APO	767	782	LKQKLENLQNSQLPES	7.51	3	13	7.62	7.93	4.593	35.331	0.8083	Medium	7.62	7.93	4.724	36.337	0.8035	Medium	7.63	7.93	4.667	35.903	0.7698	Medium	7.62	7.93	7.985	61.423	0.8044	Medium	7.63	7.93	7.821	60.163	0.7649	Medium	7.62	7.93	7.895	60.728	0.794	Medium	7.63	7.93	9.969	76.685	0.7811	Medium	7.63
APO	768	782	KQKLENLQNSQLPES	7.11	2	12	7.22	7.61	4.358	36.315	0.9413	High	7.21	7.61	4.479	37.322	0.9508	High	7.22	7.61	4.396	36.636	0.9448	High	7.21	7.61	7.241	60.339	0.9498	High	7.21	7.61	7.132	59.433	0.9471	High	7.21	7.61	7.281	60.676	0.9459	High	7.22	7.61	9.186	76.554	0.9266	High	7.22
APO	783	796	FRVPYDPGLKAGAL	10.17	3	10	10.49	10.6	0.299	2.989	0.8925	High	10.49	10.6	0.298	2.983	0.8899	High	10.49	10.6	0.343	3.431	0.8782	High	10.49	10.6	0.541	5.409	0.8988	High	10.49	10.6	0.468	4.681	0.8914	High	10.49	10.6	0.584	5.843	0.9031	High	10.49	10.6	1.457	14.566	0.8864	High	10.49
APO	789	796	PGLKAGAL	10.19	1	6	10.46	10.55	0.23	3.841	0.8891	Medium	10.45	10.54	0.22	3.673	0.8354	Medium	10.46	10.55	0.262	4.363	0.8177	Medium	10.46	10.55	0.419	6.977	0.8304	Medium	10.45	10.55	0.32	5.335	0.8047	Medium	10.46	10.55	0.443	7.387	0.851	Medium	10.46	10.55	1.034	17.235	0.8142	Medium	10.46
APO	797	801	AIEKC	4.67	1	3	4.64	4.78	0.969	32.313	0.8245	Medium	4.64	4.78	1.003	33.434	0.8459	Medium	4.64	4.78	1.026	34.202	0.8318	Medium	4.64	4.78	1.094	36.477	0.8179	Medium	4.64	4.78	1.116	37.209	0.8194	Medium	4.64	4.78	1.12	37.329	0.8204	Medium	4.64	4.78	1.73	57.674	0.7961	Medium	4.64
APO	797	812	AIEKCKVMASKKKPLW	7	4	13	7.2	7.36	2.43	18.691	0.9182	Medium	7.19	7.36	2.475	19.036	0.9222	Medium	7.19	7.36	2.398	18.448	0.9262	Medium	7.19	7.35	3.03	23.307	0.929	Medium	7.19	7.36	2.969	22.835	0.9282	Medium	7.19	7.35	3.079	23.685	0.9125	Medium	7.19	7.36	4.589	35.3	0.9201	Medium	7.19
APO	797	815	AIEKCKVMASKKKPLWLEF	10.45	4	16	10.6	10.9	1.819	11.37	0.9168	High	10.6	10.9	1.749	10.929	0.9148	High	10.6	10.9	1.734	10.84	0.9137	High	10.6	10.9	2.344	14.652	0.9134	High	10.6	10.9	2.233	13.956	0.914	High	10.6	10.9	2.359	14.744	0.9115	High	10.6	10.9	3.512	21.948	0.9175	High	10.6
APO	814	823	EFKCADPTAL	9.84	2	7	9.92	10.09	0.183	2.612	0.7466	Medium	9.91	10.09	0.243	3.475	0.6931	Medium	9.92	10.1	0.293	4.188	0.5819	Medium	9.92	10.09	0.349	4.98	0.6673	Medium	9.92	10.09	0.334	4.772	0.6013	Medium	9.92	10.1	0.379	5.41	0.6911	Medium	9.92	10.09	0.459	6.554	0.6249	Medium	9.92
APO	816	823	KCADPTAL	7.06	1	5	7.25	7.36	1.064	21.283	0.8325	Medium	7.31	7.38	1.147	22.948	0.8095	Medium	7.41	7.48	1.084	21.689	0.7718	Medium	7.25	7.35	2.737	54.733	0.7874	Medium	7.32	7.38	2.68	53.602	0.8015	Medium	7.25	7.35	2.738	54.768	0.7816	Medium	7.25	7.36	3.741	74.83	0.6682	Medium	7.25
APO	816	829	KCADPTALSNETIG	8.17	2	11	8.39	8.62	3.872	35.204	0.9095	Medium	8.39	8.62	4.026	36.599	0.9129	Medium	8.39	8.63	3.985	36.228	0.9	Medium	8.39	8.62	6.001	54.558	0.8876	Medium	8.39	8.62	5.869	53.354	0.8914	Medium	8.39	8.63	5.995	54.497	0.8794	Medium	8.56	8.63	7.048	64.075	0.8442	Medium	8.46
APO	816	838	KCADPTALSNETIGIIFKHGDDL	12.26	3	20	12.61	12.68	2.087	10.434	0.7705	Medium	12.6	12.68	2.119	10.594	0.7869	Medium	12.61	12.68	2.271	11.353	0.7709	Medium	12.66	12.74	2.838	14.188	0.7388	Medium	12.6	12.68	3.265	16.326	0.7426	Medium	12.6	12.68	3.267	16.334	0.7543	Medium	12.71	12.78	3.384	16.921	0.7536	Medium	12.61
APO	816	842	KCADPTALSNETIGIIFKHGDDLRQDM	12.04	3	24	12.26	12.39	3.916	16.317	0.819	Medium	12.26	12.38	4.062	16.924	0.8548	Medium	12.26	12.39	4.099	17.079	0.8214	Medium	12.26	12.39	6.871	28.631	0.877	Medium	12.26	12.38	6.561	27.337	0.8531	Medium	12.26	12.38	6.83	28.458	0.8255	Medium	12.26	12.39	9.291	38.712	0.8221	Medium	12.26
APO	816	843	KCADPTALSNETIGIIFKHGDDLRQDML	12.57	4	25	12.73	12.85	3.945	15.782	0.8265	Medium	12.73	12.84	4.042	16.17	0.8183	Medium	12.73	12.85	4.104	16.417	0.7615	Medium	12.73	12.85	6.736	26.943	0.7936	Medium	12.78	12.84	6.561	26.246	0.7381	Medium	12.73	12.84	6.791	27.163	0.7865	Medium	12.78	12.86	9.258	37.034	0.7278	Medium	12.73
APO	816	845	KCADPTALSNETIGIIFKHGDDLRQDMLIL	13.76	4	27	13.79	13.92	3.56	13.184	0.7146	Medium	13.79	13.92	3.85	14.261	0.7262	Medium	13.8	13.92	3.943	14.602	0.6678	Medium	13.8	13.92	6.549	24.256	0.7438	Medium	13.79	13.92	6.474	23.977	0.6655	Medium	13.79	13.92	6.63	24.556	0.7063	Medium	13.8	13.92	8.436	31.244	0.6431	Medium	13.8
APO	824	829	SNETIG	5.53	1	4	5.88	5.99	1.208	30.209	0.7863	Medium	5.91	5.98	1.319	32.979	0.7973	Medium	5.87	5.98	1.283	32.064	0.7774	Medium	5.88	5.99	1.74	43.489	0.773	Medium	5.87	5.98	1.755	43.867	0.7817	Medium	5.87	5.98	1.741	43.521	0.7641	Medium	5.95	6.02	1.991	49.776	0.7252	Medium	5.87
APO	843	848	LILQIL	14.29	1	4	14.22	14.29	0.166	4.156	0.7849	Medium	14.22	14.29	0.169	4.218	0.7913	Medium	14.28	14.35	0.091	2.282	0.7648	Medium	14.27	14.34	0.191	4.77	0.7841	Medium	14.22	14.29	0.171	4.283	0.7332	Medium	14.22	14.29	0.204	5.101	0.7698	Medium	14.26	14.33	0.118	2.943	0.7492	Medium	14.23
APO	844	852	ILQILRIME	13.25	2	7	13.5	13.57	0.036	0.515	0.9034	Medium	13.49	13.57	0.007	0.098	0.8959	Medium	13.49	13.57	0.01	0.146	0.8245	Medium	13.5	13.57	0.035	0.506	0.8947	Medium	13.49	13.57	0.076	1.09	0.838	Medium	13.49	13.57	0.005	0.072	0.9137	Medium	13.49	13.57	0.003	0.048	0.7676	Medium	13.5
APO	849	861	RIMESIWETESLD	11.9	2	11	12.09	12.16	0.493	4.482	0.7395	Medium	12.08	12.16	0.5	4.542	0.7321	Medium	12.08	12.16	0.459	4.172	0.6835	Medium	12.08	12.16	0.908	8.252	0.748	Medium	12.08	12.16	0.791	7.194	0.7233	Medium	12.08	12.16	0.947	8.61	0.7282	Medium	12.08	12.16	1.737	15.787	0.7048	Medium	12.09
APO	849	862	RIMESIWETESLDL	13.25	2	12	13.58	13.72	0.421	3.511	0.8623	Medium	13.57	13.71	0.523	4.358	0.8813	Medium	13.58	13.71	0.565	4.711	0.8776	Medium	13.58	13.71	0.962	8.015	0.8592	Medium	13.57	13.71	0.871	7.262	0.8504	Medium	13.57	13.71	0.923	7.688	0.8763	Medium	13.58	13.71	1.864	15.53	0.8355	Medium	13.58
APO	853	861	SIWETESLD	11.57	1	7	11.78	11.94	0.476	6.804	0.8398	Medium	11.78	11.94	0.504	7.201	0.854	Medium	11.78	11.94	0.502	7.168	0.8314	Medium	11.78	11.94	0.851	12.158	0.8676	Medium	11.78	11.94	0.8	11.429	0.8512	Medium	11.78	11.94	0.847	12.107	0.8414	Medium	11.78	11.94	1.597	22.807	0.8207	Medium	11.78
APO	853	862	SIWETESLDL	13.36	1	8	13.61	13.72	0.422	5.279	0.8821	Medium	13.6	13.71	0.434	5.43	0.8688	Medium	13.6	13.71	0.471	5.891	0.8288	Medium	13.61	13.71	0.828	10.344	0.8668	Medium	13.6	13.71	0.768	9.606	0.8459	Medium	13.6	13.71	0.775	9.685	0.8661	Medium	13.6	13.71	1.72	21.497	0.7738	Medium	13.6
APO	862	878	LCLLPYGCISTGDKIGM	13.08	2	14	13.31	13.4	0.381	2.719	0.9221	Medium	13.31	13.4	0.387	2.767	0.9094	Medium	13.31	13.4	0.424	3.029	0.8855	Medium	13.31	13.4	0.72	5.144	0.9214	Medium	13.31	13.4	0.686	4.9	0.8885	Medium	13.31	13.4	0.719	5.135	0.9202	Medium	13.31	13.4	1.836	13.115	0.8814	Medium	13.31
APO	862	880	LCLLPYGCISTGDKIGMIE	13.7	3	16	13.69	13.71	0.408	2.549	0.7083	Medium	13.68	13.7	0.523	3.272	0.7189	Medium	13.69	13.7	0.402	2.512	0.6328	Medium	13.69	13.71	0.693	4.334	0.7153	Medium	13.68	13.7	0.738	4.611	0.6256	Medium	13.68	13.7	1.016	6.351	0.7238	Medium	13.69	13.7	1.641	10.258	0.6226	Medium	13.69
APO	863	878	CLLPYGCISTGDKIGM	12.04	2	13	12.33	12.49	0.452	3.474	0.9231	Medium	12.32	12.48	0.474	3.649	0.9223	Medium	12.33	12.49	0.491	3.779	0.924	Medium	12.33	12.49	0.762	5.865	0.9257	Medium	12.32	12.48	0.689	5.298	0.9236	Medium	12.32	12.48	0.848	6.523	0.9223	Medium	12.33	12.49	1.768	13.596	0.9126	Medium	12.33
APO	863	880	CLLPYGCISTGDKIGMIE	12.46	2	15	12.82	12.94	0.403	2.69	0.8648	Medium	12.82	12.94	0.378	2.52	0.8894	Medium	12.82	12.94	0.462	3.083	0.894	Medium	12.82	12.94	0.667	4.446	0.901	Medium	12.82	12.94	0.646	4.309	0.9	Medium	12.82	12.94	0.728	4.85	0.901	Medium	12.82	12.94	1.653	11.019	0.8825	Medium	12.82
APO	865	878	LPYGCISTGDKIGM	10.57	2	12	10.72	10.78	0.534	4.45	0.7322	Medium	10.72	10.78	0.519	4.329	0.7373	Medium	10.73	10.78	0.526	4.381	0.675	Medium	10.72	10.78	0.804	6.696	0.7329	Medium	10.72	10.78	0.813	6.777	0.711	Medium	10.72	10.78	1.026	8.553	0.7336	Medium	10.8	10.88	1.731	14.422	0.6742	Medium	10.73
APO	870	878	ISTGDKIGM	7.8	2	7	7.93	7.96	0.758	10.833	0.8118	Medium	7.93	7.96	0.726	10.368	0.789	Medium	7.94	7.96	0.682	9.744	0.6933	Medium	7.93	7.96	0.879	12.559	0.7884	Medium	7.94	7.96	0.777	11.095	0.731	Medium	7.93	7.96	0.88	12.565	0.7811	Medium	7.94	7.96	1.243	17.754	0.7507	Medium	7.94
APO	879	887	IEIVKDATT	7.16	1	7	7.37	7.55	1.742	24.886	0.9217	Medium	7.36	7.55	1.804	25.771	0.9086	Medium	7.37	7.55	1.823	26.045	0.9021	Medium	7.36	7.55	2.881	41.16	0.9048	Medium	7.37	7.55	2.814	40.193	0.9093	Medium	7.36	7.55	2.872	41.03	0.9214	Medium	7.37	7.55	3.842	54.88	0.9088	Medium	7.37
APO	879	889	IEIVKDATTIA	9.23	1	9	9.37	9.46	1.874	20.823	0.891	Medium	9.38	9.46	1.965	21.836	0.884	Medium	9.46	9.53	1.972	21.908	0.8923	Medium	9.37	9.46	3.216	35.73	0.8623	Medium	9.37	9.46	3.203	35.591	0.8722	Medium	9.38	9.47	3.158	35.088	0.8831	Medium	9.37	9.47	4.241	47.12	0.8524	Medium	9.37
APO	879	901	IEIVKDATTIAKIQQSTVGNTGA	10.2	3	21	10.22	10.43	7.426	35.362	0.7826	Medium	10.22	10.43	7.668	36.514	0.8102	Medium	10.22	10.43	7.531	35.86	0.7941	Medium	10.22	10.43	8.788	41.845	0.7633	Medium	10.22	10.43	9.025	42.978	0.7901	Medium	10.22	10.43	8.945	42.594	0.7426	Medium	10.22	10.43	10.505	50.024	0.7452	Medium	10.22
APO	879	910	IEIVKDATTIAKIQQSTVGNTGAFKDEVLNHW	12.06	4	30	11.88	12.25	9.142	30.473	0.8044	Medium	11.87	12.25	9.182	30.608	0.8195	Medium	11.88	12.25	9.051	30.17	0.7761	Medium	11.87	12.25	11.833	39.442	0.7574	Medium	11.87	12.25	11.664	38.881	0.7951	Medium	11.87	12.25	12.022	40.073	0.7675	Medium	11.87	12.25	14.02	46.734	0.7342	Medium	11.88
APO	881	887	IVKDATT	4.14	1	5	4.1	4.17	1.725	34.508	0.8915	Medium	4.17	4.24	1.68	33.604	0.9251	Medium	4.08	4.27	1.669	33.381	0.9216	Medium	4.09	4.27	2.359	47.184	0.9283	Medium	4.08	4.27	2.306	46.112	0.9133	Medium	4.08	4.27	2.427	48.545	0.9248	Medium	4.09	4.27	2.778	55.551	0.9204	Medium	4.08
APO	888	901	IAKIQQSTVGNTGA	6.15	2	12	6.43	6.52	6.34	52.83	0.9187	High	6.42	6.52	6.462	53.846	0.9284	High	6.43	6.52	6.459	53.825	0.9298	Medium	6.43	6.52	6.906	57.547	0.9295	High	6.43	6.52	6.92	57.666	0.9314	High	6.42	6.52	7.033	58.609	0.9183	High	6.43	6.52	7.709	64.241	0.9121	Medium	6.43
APO	902	910	FKDEVLNHW	10.1	3	7	10.44	10.52	0.238	3.399	0.8375	Medium	10.44	10.52	0.269	3.838	0.8628	Medium	10.44	10.52	0.233	3.324	0.8968	Medium	10.44	10.52	0.353	5.043	0.8894	Medium	10.44	10.52	0.332	4.742	0.9012	High	10.44	10.53	0.438	6.258	0.8822	Medium	10.44	10.52	0.937	13.392	0.8693	Medium	10.44
APO	902	924	FKDEVLNHWLKEKSPTEEKFQAA	9.54	3	20	9.72	9.86	1.612	8.062	0.6342	Medium	9.71	9.86	1.588	7.939	0.6131	Medium	9.72	9.86	1.68	8.4	0.6088	Medium	9.72	9.86	2.477	12.385	0.6537	Medium	9.72	9.86	2.491	12.453	0.6379	Medium	9.72	9.86	2.51	12.549	0.6611	Medium	9.72	9.86	3.572	17.859	0.5626	Medium	9.72
APO	927	934	RFVYSCAG	8.5	2	6	8.7	8.79	0.142	2.361	0.8302	Medium	8.7	8.8	0.108	1.807	0.8881	Medium	8.7	8.8	0.153	2.558	0.8951	Medium	8.7	8.79	0.136	2.269	0.864	Medium	8.79	8.86	0.178	2.959	0.7992	Medium	8.71	8.8	0.17	2.835	0.8603	Medium	8.7	8.79	0.17	2.838	0.8647	Medium	8.7
APO	929	934	VYSCAG	6.2	1	4	6.36	6.51	0.081	2.023	0.9133	Medium	6.36	6.5	0.085	2.132	0.9031	Medium	6.36	6.5	0.107	2.671	0.869	Medium	6.36	6.51	0.108	2.693	0.9053	Medium	6.36	6.5	0.123	3.077	0.869	Medium	6.36	6.5	0.133	3.33	0.8907	Medium	6.36	6.5	0.107	2.682	0.8695	Medium	6.36
APO	935	939	YCVAT	6.89	1	3	7.16	7.34	0.03	1.015	0.9119	Medium	7.15	7.33	0.037	1.244	0.9004	Medium	7.16	7.33	0.049	1.624	0.9073	Medium	7.16	7.33	0.043	1.44	0.9055	Medium	7.16	7.33	0.037	1.246	0.8993	Medium	7.15	7.33	0.044	1.465	0.9008	Medium	7.16	7.33	0.038	1.251	0.9057	Medium	7.16
APO	940	953	FVLGIGDRHNDNIM	10.61	3	12	10.95	11.04	0.167	1.389	0.9217	Medium	10.95	11.04	0.154	1.286	0.9148	Medium	10.95	11.04	0.209	1.742	0.9128	Medium	10.95	11.04	0.294	2.453	0.9227	Medium	10.95	11.04	0.274	2.285	0.921	Medium	10.95	11.05	0.311	2.59	0.9208	Medium	10.95	11.04	0.708	5.901	0.9227	Medium	10.95
APO	954	960	ITETGNL	7.64	1	5	7.88	7.94	0.358	7.17	0.8952	Medium	7.88	7.94	0.359	7.176	0.8735	Medium	7.97	8.04	0.349	6.976	0.9045	Medium	7.88	7.94	0.875	17.509	0.8763	Medium	7.89	7.94	0.873	17.468	0.8274	Medium	7.88	7.94	0.95	19.004	0.8939	Medium	7.89	7.95	1.33	26.6	0.8252	Medium	7.89
APO	954	961	ITETGNLF	11.35	1	6	11.59	11.71	0.296	4.931	0.8826	Medium	11.59	11.7	0.301	5.018	0.8625	Medium	11.69	11.76	0.335	5.585	0.8894	Medium	11.59	11.71	0.726	12.094	0.8645	Medium	11.59	11.7	0.74	12.34	0.8481	Medium	11.58	11.7	0.769	12.819	0.8788	Medium	11.59	11.71	1.175	19.585	0.8279	Medium	11.59
APO	954	975	ITETGNLFHIDFGHILGNYKSF	13.27	2	20	13.55	13.61	5.152	25.758	0.7446	Medium	13.52	13.59	5.334	26.668	0.7296	Medium	13.54	13.64	5.383	26.914	0.7226	Medium	13.54	13.64	5.88	29.4	0.7476	Medium	13.53	13.63	5.786	28.93	0.7625	Medium	13.53	13.63	5.796	28.98	0.7291	Medium	13.54	13.64	6.288	31.44	0.6438	Medium	13.54
APO	954	976	ITETGNLFHIDFGHILGNYKSFL	13.82	4	21	13.98	14.24	6.185	29.453	0.7464	Medium	13.98	14.24	6.322	30.105	0.7541	Medium	13.98	14.24	6.34	30.189	0.7314	Medium	13.98	14.24	6.919	32.946	0.736	Medium	13.98	14.24	6.805	32.405	0.7181	Medium	13.98	14.24	6.852	32.631	0.7283	Medium	13.98	14.24	7.347	34.983	0.7019	Medium	13.98
APO	954	992	ITETGNLFHIDFGHILGNYKSFLGINKERVPFVLTPDFL	13.99	5	35	14.17	14.31	8.998	25.709	0.7217	Medium	14.17	14.31	9.05	25.858	0.7325	Medium	14.17	14.32	9.076	25.933	0.7204	Medium	14.18	14.32	9.995	28.556	0.7426	Medium	14.17	14.31	9.925	28.356	0.7088	Medium	14.17	14.31	10.194	29.125	0.7331	Medium	14.17	14.32	10.988	31.393	0.7434	Medium	14.18
APO	961	971	FHIDFGHILGN	12.47	3	9	12.31	12.42	2.749	30.547	0.8613	Medium	12.31	12.42	2.82	31.33	0.8319	Medium	12.31	12.42	2.83	31.444	0.7987	Medium	12.31	12.42	3.364	37.373	0.8528	Medium	12.31	12.42	3.382	37.579	0.8485	Medium	12.31	12.42	3.394	37.714	0.8524	Medium	12.39	12.47	3.793	42.147	0.7391	Medium	12.31
APO	961	972	FHIDFGHILGNY	12.72	3	10	13.03	13.12	3.339	33.386	0.9555	High	13.02	13.11	3.388	33.884	0.9532	High	13.02	13.12	3.397	33.966	0.9516	High	13.03	13.12	3.803	38.033	0.9494	High	13.02	13.11	3.811	38.113	0.949	High	13.02	13.11	3.883	38.832	0.9484	High	13.02	13.12	4.292	42.921	0.9296	High	13.03
APO	961	975	FHIDFGHILGNYKSF	12.57	2	13	12.68	12.79	5.397	41.517	0.769	Medium	12.68	12.79	5.178	39.833	0.7548	Medium	12.68	12.79	5.065	38.959	0.7181	Medium	12.68	12.79	5.701	43.851	0.7797	Medium	12.68	12.79	5.911	45.471	0.7546	Medium	12.68	12.79	5.889	45.298	0.7869	Medium	12.68	12.79	6.374	49.027	0.6798	Medium	12.68
APO	961	991	FHIDFGHILGNYKSFLGINKERVPFVLTPDF	13.67	5	27	13.86	13.97	9.599	35.55	0.6221	Medium	13.86	13.97	9.772	36.191	0.647	Medium	13.86	13.97	9.641	35.707	0.6318	Medium	13.87	13.98	10.512	38.933	0.6565	Medium	13.86	13.97	10.703	39.642	0.6322	Medium	13.86	13.97	10.748	39.808	0.6418	Medium	13.86	13.97	11.321	41.93	0.6032	Medium	13.86
APO	961	992	FHIDFGHILGNYKSFLGINKERVPFVLTPDFL	13.92	4	28	13.97	14.24	9.124	32.585	0.6734	Medium	13.97	14.24	9.014	32.191	0.6764	Medium	13.97	14.24	9.116	32.558	0.6634	Medium	13.98	14.24	10.134	36.193	0.6961	Medium	13.97	14.24	9.957	35.559	0.6679	Medium	13.97	14.24	10.255	36.625	0.6749	Medium	13.97	14.24	10.842	38.722	0.6582	Medium	13.97
APO	962	992	HIDFGHILGNYKSFLGINKERVPFVLTPDFL	13.65	5	27	13.78	13.87	9.224	34.165	0.7922	Medium	13.78	13.87	9.326	34.539	0.8248	Medium	13.79	13.87	9.433	34.938	0.7944	Medium	13.79	13.87	9.974	36.941	0.7947	Medium	13.78	13.87	10.042	37.191	0.7946	Medium	13.78	13.87	10.271	38.042	0.8044	Medium	13.79	13.87	10.951	40.56	0.7503	Medium	13.79
APO	973	992	KSFLGINKERVPFVLTPDFL	12.87	4	16	13.1	13.25	4.038	25.241	0.9077	Medium	13.1	13.24	3.965	24.781	0.9158	Medium	13.1	13.24	3.99	24.939	0.9293	Medium	13.1	13.24	4.421	27.63	0.9111	Medium	13.1	13.24	4.351	27.196	0.9248	Medium	13.1	13.24	4.467	27.918	0.9143	Medium	13.1	13.24	4.948	30.925	0.9076	Medium	13.1
APO	976	992	LGINKERVPFVLTPDFL	13.24	3	13	13.38	13.67	2.408	18.526	0.9352	High	13.37	13.67	2.393	18.405	0.9312	High	13.38	13.67	2.395	18.421	0.9331	High	13.38	13.67	2.81	21.617	0.9403	High	13.37	13.67	2.743	21.101	0.9308	High	13.37	13.67	2.848	21.908	0.9359	High	13.38	13.67	3.326	25.587	0.9337	High	13.38
APO	977	991	GINKERVPFVLTPDF	12.2	3	11	12.23	12.35	1.948	17.712	0.8012	Medium	12.22	12.34	1.964	17.851	0.8261	Medium	12.23	12.35	1.954	17.76	0.8354	Medium	12.23	12.35	2.419	21.994	0.8434	Medium	12.22	12.34	2.304	20.943	0.8614	Medium	12.22	12.34	2.434	22.127	0.8268	Medium	12.23	12.34	2.933	26.662	0.7943	Medium	12.23
APO	977	992	GINKERVPFVLTPDFL	12.98	3	12	13.2	13.31	1.782	14.852	0.9376	Medium	13.2	13.31	1.79	14.921	0.933	Medium	13.2	13.31	1.807	15.06	0.9235	Medium	13.2	13.31	2.206	18.387	0.931	Medium	13.2	13.31	2.157	17.975	0.9327	Medium	13.2	13.31	2.236	18.635	0.9349	Medium	13.2	13.31	2.685	22.374	0.9063	Medium	13.2
APO	980	992	KERVPFVLTPDFL	12.82	3	9	13.12	13.25	0.587	6.525	0.8477	Medium	13.11	13.25	0.61	6.773	0.8779	Medium	13.12	13.25	0.531	5.895	0.9107	Medium	13.12	13.25	0.935	10.386	0.9049	Medium	13.11	13.25	0.785	8.719	0.9095	Medium	13.11	13.25	0.935	10.391	0.903	Medium	13.12	13.25	1.32	14.664	0.8796	Medium	13.12
APO	992	1014	LFVMGTSGKKTSPHFQKFQDICV	10.26	4	20	10.36	10.53	1.11	5.549	0.8442	Medium	10.36	10.53	1.102	5.512	0.8383	Medium	10.36	10.53	1.047	5.235	0.8168	Medium	10.36	10.53	1.495	7.474	0.833	Medium	10.36	10.53	1.34	6.701	0.8295	Medium	10.37	10.54	1.52	7.599	0.8454	Medium	10.36	10.53	1.669	8.347	0.7973	Medium	10.36
APO	993	1014	FVMGTSGKKTSPHFQKFQDICV	9.54	2	19	9.72	9.92	1.27	6.685	0.8383	Medium	9.71	9.91	1.271	6.69	0.8114	Medium	9.72	9.92	1.184	6.231	0.7903	Medium	9.72	9.92	1.652	8.693	0.8221	Medium	9.72	9.92	1.561	8.215	0.8012	Medium	9.72	9.92	1.606	8.452	0.8291	Medium	9.72	9.92	2.057	10.828	0.7618	Medium	9.72
APO	1007	1014	QKFQDICV	9.92	2	6	10.2	10.22	0.222	3.694	0.7595	Medium	10.2	10.22	0.285	4.746	0.7267	Medium	10.21	10.22	0.308	5.131	0.704	Medium	10.2	10.22	0.292	4.873	0.758	Medium	10.2	10.22	0.235	3.92	0.7589	Medium	10.21	10.22	0.249	4.155	0.771	Medium	10.2	10.22	0.245	4.084	0.6397	Medium	10.2
APO	1015	1026	KAYLALRHHTNL	6.32	3	10	6.62	6.73	0.248	2.479	0.9073	Medium	6.61	6.73	0.281	2.811	0.9085	Medium	6.61	6.73	0.293	2.927	0.9006	Medium	6.62	6.73	0.325	3.248	0.8928	Medium	6.61	6.73	0.322	3.216	0.8976	Medium	6.61	6.73	0.374	3.741	0.8883	Medium	6.61	6.73	0.602	6.017	0.8913	Medium	6.61
APO	1015	1027	KAYLALRHHTNLL	7.7	2	11	7.99	8.14	0.235	2.136	0.7728	Medium	7.99	8.14	0.321	2.922	0.7888	Medium	8	8.14	0.231	2.098	0.8173	Medium	7.99	8.14	0.253	2.301	0.7906	Medium	8	8.14	0.276	2.511	0.7904	Medium	7.99	8.14	0.276	2.513	0.7765	Medium	8	8.14	0.599	5.446	0.8162	Medium	8
APO	1017	1027	YLALRHHTNLL	8.29	2	9	8.52	8.65	0.231	2.568	0.7986	Medium	8.52	8.65	0.264	2.936	0.77	Medium	8.53	8.65	0.202	2.241	0.712	Medium	8.52	8.65	0.315	3.495	0.7636	Medium	8.52	8.65	0.237	2.639	0.7109	Medium	8.52	8.66	0.334	3.711	0.7555	Medium	8.53	8.65	0.484	5.375	0.7023	Medium	8.53
APO	1019	1026	ALRHHTNL	4.23	2	6	4.33	4.55	0.307	5.11	0.9079	Medium	4.32	4.54	0.345	5.758	0.9002	Medium	4.33	4.55	0.322	5.372	0.89	Medium	4.33	4.55	0.371	6.182	0.8972	Medium	4.33	4.54	0.347	5.78	0.8908	Medium	4.33	4.54	0.437	7.279	0.8916	Medium	4.33	4.55	0.684	11.402	0.8659	Medium	4.33
APO	1019	1027	ALRHHTNLL	6.22	2	7	6.53	6.78	0.233	3.325	0.8336	Medium	6.52	6.78	0.232	3.311	0.8317	Medium	6.53	6.78	0.219	3.135	0.8346	Medium	6.53	6.78	0.247	3.533	0.8472	Medium	6.53	6.78	0.295	4.21	0.8178	Medium	6.52	6.78	0.246	3.512	0.8198	Medium	6.53	6.78	0.506	7.224	0.7974	Medium	6.53
APO	1027	1031	LIILF	14.81	1	3	14.73	14.86	0.018	0.593	0.9077	Medium	14.73	14.86	0.028	0.942	0.9118	Medium	14.74	14.86	0.05	1.653	0.9067	Medium	14.74	14.86	0.04	1.343	0.9106	Medium	14.73	14.86	0.045	1.484	0.9147	Medium	14.73	14.86	0.035	1.166	0.9059	Medium	14.74	14.86	0.026	0.858	0.8955	Medium	14.74
APO	1031	1035	FSMML	13.4	1	3	13.82	13.89	0.026	0.861	0.9006	Medium	13.82	13.89	0.045	1.485	0.9074	Medium	13.82	13.9	0.043	1.434	0.9048	Medium	13.82	13.9	0.028	0.94	0.9029	Medium	13.82	13.89	0.051	1.713	0.895	Medium	13.82	13.89	0.054	1.783	0.9052	Medium	13.82	13.9	0.055	1.84	0.9109	Medium	13.82
APO	1035	1042	LMTGMPQL	11.88	1	5	12.12	12.16	1.815	36.301	0.8669	Medium	12.11	12.16	1.92	38.399	0.873	Medium	12.12	12.16	1.911	38.225	0.8727	Medium	12.12	12.16	2.638	52.755	0.8817	Medium	12.12	12.16	2.659	53.18	0.8864	Medium	12.11	12.16	2.754	55.075	0.8869	Medium	12.12	12.16	3.541	70.813	0.8379	Medium	12.12
APO	1035	1050	LMTGMPQLTSKEDIEY	10.99	2	13	11.12	11.39	4.435	34.117	0.8044	Medium	11.12	11.38	4.467	34.359	0.8153	Medium	11.12	11.39	4.378	33.679	0.8019	Medium	11.12	11.39	5.946	45.736	0.7894	Medium	11.12	11.39	5.757	44.286	0.7935	Medium	11.12	11.39	5.869	45.145	0.7919	Medium	11.12	11.39	7.952	61.166	0.7422	Medium	11.12
APO	1036	1042	MTGMPQL	11.2	1	4	11.31	11.4	1.86	46.492	0.7571	Medium	11.31	11.4	1.917	47.933	0.7653	Medium	11.31	11.41	1.859	46.463	0.7729	Medium	11.31	11.4	2.651	66.263	0.794	Medium	11.31	11.4	2.606	65.162	0.7832	Medium	11.31	11.41	2.642	66.057	0.8076	Medium	11.31	11.4	3.272	81.802	0.7209	Medium	11.31
APO	1036	1049	MTGMPQLTSKEDIE	9.49	2	11	9.77	9.9	4.199	38.176	0.7835	Medium	9.76	9.9	4.27	38.822	0.8022	Medium	9.77	9.9	4.256	38.687	0.7954	Medium	9.77	9.9	5.455	49.593	0.7803	Medium	9.77	9.9	5.397	49.061	0.7903	Medium	9.77	9.91	5.366	48.784	0.7666	Medium	9.77	9.9	6.948	63.163	0.758	Medium	9.77
APO	1050	1071	YIRDALTVGKNEEDAKKYFLDQ	9.85	4	20	9.95	10.29	2.494	12.47	0.8254	Medium	9.95	10.28	2.474	12.368	0.8342	Medium	9.95	10.29	2.421	12.107	0.8365	Medium	9.95	10.29	2.907	14.536	0.8301	Medium	9.95	10.29	2.677	13.386	0.8413	Medium	9.96	10.29	2.84	14.2	0.8316	Medium	9.95	10.29	3.082	15.411	0.8052	Medium	9.95
APO	1051	1069	IRDALTVGKNEEDAKKYFL	9.61	5	17	9.8	9.88	2.079	12.229	0.7962	Medium	9.8	9.88	2.103	12.372	0.8082	Medium	9.8	9.89	2.015	11.85	0.7861	Medium	9.8	9.88	2.343	13.782	0.8009	Medium	9.8	9.88	2.36	13.882	0.8218	Medium	9.81	9.89	2.504	14.732	0.8062	Medium	9.8	9.88	2.539	14.935	0.7843	Medium	9.8
APO	1051	1071	IRDALTVGKNEEDAKKYFLDQ	9.48	3	19	9.66	9.76	2.472	13.01	0.8342	Medium	9.66	9.76	2.499	13.154	0.8604	Medium	9.66	9.76	2.514	13.231	0.8648	Medium	9.66	9.76	2.887	15.192	0.8581	Medium	9.66	9.76	2.777	14.614	0.875	Medium	9.66	9.76	2.834	14.914	0.8514	Medium	9.66	9.76	3.071	16.163	0.8425	Medium	9.66
APO	1051	1073	IRDALTVGKNEEDAKKYFLDQIE	10.45	4	21	10.69	10.77	2.278	10.849	0.7966	Medium	10.69	10.77	2.357	11.224	0.8006	Medium	10.69	10.78	2.447	11.651	0.8235	Medium	10.69	10.77	2.693	12.822	0.8225	Medium	10.69	10.77	2.587	12.321	0.815	Medium	10.69	10.77	2.677	12.748	0.8171	Medium	10.69	10.77	2.875	13.691	0.8051	Medium	10.69
APO	1072	1084	IEVCRDKGWTVQF	11.18	3	11	11.38	11.61	1.297	11.79	0.9202	Medium	11.38	11.6	1.32	11.999	0.9076	Medium	11.38	11.61	1.289	11.72	0.9131	Medium	11.38	11.61	2.965	26.952	0.9193	Medium	11.38	11.6	2.859	25.99	0.9139	Medium	11.38	11.6	3.006	27.329	0.9226	Medium	11.38	11.6	5.273	47.938	0.9108	Medium	11.38
APO	1074	1084	VCRDKGWTVQF	10.65	2	9	10.95	11.02	1.173	13.03	0.7311	Medium	10.95	11.01	1.272	14.13	0.7039	Medium	10.95	11.02	1.26	14.004	0.673	Medium	10.95	11.02	2.894	32.156	0.6935	Medium	10.95	11.02	2.788	30.979	0.6721	Medium	10.95	11.02	2.862	31.798	0.7183	Medium	10.95	11.02	5.168	57.422	0.6695	Medium	10.87
APO	1085	1092	NWFLHLVL	14.19	2	6	14.39	14.65	1.62	27	0.9221	Medium	14.39	14.65	1.709	28.488	0.9245	High	14.39	14.65	1.643	27.388	0.9289	High	14.39	14.65	3.941	65.691	0.9417	High	14.39	14.65	3.872	64.539	0.916	High	14.39	14.65	3.989	66.475	0.9317	High	14.39	14.65	4.896	81.596	0.912	Medium	14.39
APO	1089	1102	HLVLGIKQGEKHSA	5.79	4	12	6.08	6.18	5.696	47.468	0.9114	Medium	6.07	6.17	5.913	49.278	0.9084	Medium	6.08	6.18	5.925	49.372	0.8757	Medium	6.08	6.18	6.615	55.124	0.8978	Medium	6.07	6.17	6.706	55.882	0.85	Medium	6.07	6.17	6.686	55.714	0.8926	Medium	6.07	6.18	6.838	56.98	0.8983	Medium	6.07
APO	1091	1102	VLGIKQGEKHSA	5.16	3	10	5.41	5.51	5.097	50.965	0.9019	Medium	5.4	5.5	5.209	52.086	0.9226	Medium	5.4	5.5	5.279	52.787	0.914	Medium	5.41	5.51	5.14	51.397	0.897	Medium	5.4	5.5	5.301	53.014	0.9113	Medium	5.4	5.5	5.328	53.28	0.9068	Medium	5.4	5.5	5.319	53.185	0.9038	Medium	5.4
APO	1093	1102	GIKQGEKHSA	3.38	1	8	3.44	3.7	3.946	49.328	0.8684	Medium	3.43	3.69	4.044	50.555	0.8831	Medium	3.44	3.7	3.979	49.74	0.8745	Medium	3.44	3.7	4.092	51.145	0.8693	Medium	3.44	3.7	3.988	49.856	0.895	Medium	3.44	3.7	4.08	51	0.8804	Medium	3.44	3.7	4.099	51.24	0.8286	Medium	3.44
IPI-549	4	12	ENYKQPVVL	9.05	1	6	9.3	9.37	5.07	84.507	0.7361	Medium	9.3	9.37	5.08	84.662	0.7794	Medium	9.3	9.37	5.094	84.896	0.7049	Medium	9.3	9.37	4.991	83.188	0.7563	Medium	9.3	9.37	5.055	84.256	0.7496	Medium	9.3	9.38	5.072	84.538	0.781	Medium	9.3	9.37	5.051	84.189	0.7685	Medium	9.26
IPI-549	6	12	YKQPVVL	8.77	1	4	9.02	9.16	3.651	91.285	0.9031	Medium	9.02	9.16	3.715	92.871	0.9145	Medium	9.02	9.16	3.754	93.85	0.8997	Medium	9.02	9.16	3.7	92.491	0.903	Medium	9.02	9.16	3.727	93.163	0.9113	Medium	9.03	9.17	3.671	91.783	0.9056	Medium	9.02	9.16	3.726	93.139	0.9209	Medium	9.02
IPI-549	13	32	REDNCRRRRRMKPRSAAASL	3.92	5	17	4.1	4.42	7.609	44.757	0.9523	High	4.1	4.42	7.736	45.508	0.9543	High	4.1	4.42	7.713	45.37	0.9293	High	4.1	4.42	7.82	46.002	0.9528	High	4.21	4.29	7.42	43.65	0.9375	High	4.1	4.42	7.779	45.756	0.9532	High	4.1	4.42	7.513	44.193	0.9352	High	4.1
IPI-549	33	37	SSMEL	9.72	1	3	9.74	9.76	2.044	68.132	0.743	Medium	9.74	9.76	2.115	70.494	0.7241	Medium	9.74	9.76	2.083	69.427	0.6026	Medium	9.74	9.76	2.308	76.936	0.7414	Medium	9.77	9.83	2.395	79.821	0.7379	Medium	9.75	9.76	2.331	77.7	0.7471	Medium	9.74	9.76	2.424	80.792	0.7338	Medium	9.74
IPI-549	36	41	ELIPIE	10.66	1	3	10.89	11.16	0.051	1.685	0.8009	Medium	11.06	11.13	0.089	2.975	0.792	Medium	10.89	11.16	0.115	3.829	0.8191	Medium	10.89	11.16	0.114	3.793	0.8054	Medium	10.89	11.16	0.126	4.215	0.806	Medium	10.9	11.16	0.11	3.658	0.8036	Medium	10.89	11.16	0.326	10.868	0.8352	Medium	10.89
IPI-549	42	58	FVLPTSQRKCKSPETAL	8.39	3	13	8.52	8.78	4.329	33.298	0.9147	High	8.51	8.77	4.433	34.102	0.9132	High	8.52	8.78	4.419	33.99	0.9076	High	8.51	8.77	5.381	41.391	0.9165	High	8.52	8.78	5.3	40.773	0.9187	High	8.51	8.78	5.269	40.53	0.9056	High	8.51	8.78	6.232	47.938	0.9104	Medium	8.52
IPI-549	43	59	VLPTSQRKCKSPETALL	8.07	3	13	8.27	8.34	4.451	34.235	0.7526	Medium	8.3	8.36	4.591	35.313	0.7722	Medium	8.3	8.47	4.62	35.535	0.7475	Medium	8.31	8.38	5.783	44.482	0.7532	Medium	8.3	8.47	5.587	42.976	0.7518	Medium	8.3	8.46	5.43	41.772	0.7447	Medium	8.3	8.46	6.541	50.318	0.7491	Medium	8.3
IPI-549	59	70	LHVAGHGNVEQM	6.68	2	10	6.79	7.06	0.848	8.485	0.8496	Medium	6.79	7.06	0.804	8.041	0.847	Medium	6.8	7.07	0.83	8.303	0.8581	Medium	6.8	7.06	1.454	14.541	0.8359	Medium	6.8	7.06	1.433	14.325	0.852	Medium	6.79	7.06	1.476	14.762	0.8604	Medium	6.8	7.07	2.07	20.702	0.858	Medium	6.8
IPI-549	59	72	LHVAGHGNVEQMKA	5.97	2	12	6.1	6.52	0.616	5.137	0.7144	Medium	6.09	6.52	0.658	5.479	0.7319	Medium	6.09	6.52	0.736	6.136	0.7266	Medium	6.09	6.52	1.201	10.005	0.6831	Medium	6.09	6.52	1.309	10.907	0.7141	Medium	6.09	6.52	1.3	10.837	0.7302	Medium	6.09	6.52	1.889	15.74	0.6891	Medium	6.09
IPI-549	60	70	HVAGHGNVEQM	5.37	1	9	5.47	5.78	0.582	6.468	0.8009	Medium	5.46	5.77	0.763	8.474	0.8253	Medium	5.46	5.77	0.773	8.59	0.7921	Medium	5.46	5.78	1.23	13.667	0.8007	Medium	5.46	5.77	1.279	14.214	0.7924	Medium	5.47	5.77	1.356	15.062	0.8136	Medium	5.46	5.78	1.801	20.007	0.7919	Medium	5.46
IPI-549	60	75	HVAGHGNVEQMKAQVW	8.28	3	14	8.45	8.69	0.413	2.947	0.8524	Medium	8.45	8.69	0.445	3.179	0.8387	Medium	8.45	8.69	0.621	4.436	0.7716	Medium	8.45	8.69	0.784	5.602	0.8481	Medium	8.45	8.69	0.783	5.596	0.8301	Medium	8.45	8.7	0.785	5.605	0.822	Medium	8.45	8.69	1.07	7.644	0.7726	Medium	8.45
IPI-549	60	78	HVAGHGNVEQMKAQVWLRA	8.62	4	17	8.81	8.89	0.516	3.036	0.7604	Medium	8.81	8.88	0.545	3.205	0.7393	Medium	8.99	9.05	0.586	3.447	0.7402	Medium	8.81	8.88	0.754	4.433	0.7538	Medium	8.81	8.88	1.018	5.989	0.6436	Medium	8.82	8.89	0.839	4.934	0.7231	Medium	8.81	8.88	1.458	8.576	0.642	Medium	8.81
IPI-549	71	76	KAQVWL	10.67	1	4	10.98	11.04	0.143	3.566	0.8819	Medium	10.97	11.04	0.153	3.813	0.8856	Medium	10.98	11.04	0.178	4.451	0.8867	Medium	10.98	11.04	0.133	3.327	0.8618	Medium	11.08	11.14	0.17	4.238	0.8196	Medium	10.98	11.05	0.152	3.801	0.8758	Medium	10.98	11.04	0.169	4.235	0.8683	Medium	10.98
IPI-549	71	78	KAQVWLRA	8.69	2	6	8.64	8.86	0.159	2.653	0.8494	Medium	8.64	8.86	0.172	2.874	0.8567	Medium	8.64	8.86	0.277	4.618	0.8063	Medium	8.64	8.86	0.222	3.702	0.8716	Medium	8.64	8.86	0.165	2.753	0.851	Medium	8.64	8.86	0.187	3.114	0.8529	Medium	8.64	8.86	0.553	9.215	0.8605	Medium	8.64
IPI-549	79	84	LETSVA	6.26	1	4	6.46	6.71	2.125	53.113	0.8692	Medium	6.51	6.58	2.169	54.229	0.895	Medium	6.46	6.71	2.227	55.673	0.8661	Medium	6.48	6.55	2.988	74.707	0.8344	Medium	6.46	6.71	3.077	76.929	0.8458	Medium	6.6	6.67	3.055	76.377	0.8483	Medium	6.46	6.72	3.248	81.196	0.8868	Medium	6.46
IPI-549	79	86	LETSVAAD	6.15	1	6	6.32	6.57	3.174	52.893	0.9169	Medium	6.47	6.53	3.28	54.661	0.9012	Medium	6.33	6.58	3.28	54.661	0.8634	Medium	6.33	6.58	4.342	72.372	0.9095	Medium	6.33	6.58	4.434	73.894	0.8891	Medium	6.32	6.57	4.388	73.132	0.8974	Medium	6.33	6.58	4.869	81.156	0.8916	Medium	6.33
IPI-549	87	99	FYHRLGPHHFLLL	10.45	3	10	10.54	10.95	0.326	3.263	0.7986	Medium	10.54	10.95	0.335	3.354	0.7977	Medium	10.54	10.95	0.375	3.753	0.81	Medium	10.54	10.95	0.623	6.233	0.7688	Medium	10.54	10.95	0.678	6.776	0.7989	Medium	10.54	10.95	0.591	5.913	0.7965	Medium	10.54	10.95	0.918	9.177	0.764	Medium	10.54
IPI-549	88	98	YHRLGPHHFLL	8.5	4	8	8.88	8.94	0.392	4.895	0.6671	Medium	8.93	9.01	0.364	4.551	0.7406	Medium	8.93	9.01	0.397	4.957	0.7028	Medium	8.92	8.98	0.768	9.605	0.6894	Medium	8.93	9.01	0.84	10.495	0.6584	Medium	8.93	9.02	0.798	9.978	0.7088	Medium	8.93	9.01	1.009	12.614	0.6325	Medium	8.93
IPI-549	100	106	YQKKGQW	6.04	2	5	6.24	6.45	1.808	36.166	0.9002	High	6.24	6.45	1.893	37.861	0.9002	High	6.24	6.45	1.943	38.85	0.8325	Medium	6.25	6.46	2.728	54.559	0.899	High	6.24	6.45	2.784	55.687	0.8889	Medium	6.24	6.45	2.717	54.333	0.8951	High	6.25	6.46	3.12	62.4	0.8938	High	6.24
IPI-549	107	113	YEIYDKY	9.1	1	5	9.31	9.53	0.993	19.856	0.8372	Medium	9.3	9.53	1.06	21.2	0.8463	Medium	9.31	9.53	1.058	21.167	0.8256	Medium	9.3	9.53	1.783	35.667	0.8192	Medium	9.3	9.53	1.881	37.614	0.8292	Medium	9.31	9.54	1.777	35.541	0.8169	Medium	9.3	9.53	2.756	55.124	0.8114	Medium	9.3
IPI-549	107	118	YEIYDKYQVVQT	9.59	2	10	9.68	9.74	1.163	11.627	0.8684	Medium	9.67	9.74	1.055	10.554	0.8542	Medium	9.67	9.74	1.206	12.062	0.8331	Medium	9.67	9.74	1.815	18.15	0.8398	Medium	9.67	9.74	1.887	18.866	0.8273	Medium	9.68	9.75	1.839	18.391	0.8332	Medium	9.67	9.74	3.263	32.634	0.8164	Medium	9.67
IPI-549	107	119	YEIYDKYQVVQTL	10.88	2	11	11.05	11.13	1.02	9.272	0.811	Medium	11.05	11.12	1.03	9.36	0.7855	Medium	11.05	11.13	1.099	9.994	0.6631	Medium	11.05	11.13	1.764	16.04	0.7954	Medium	11.05	11.13	1.827	16.612	0.7552	Medium	11.06	11.13	1.833	16.664	0.7735	Medium	11.05	11.13	3.207	29.154	0.7472	Medium	11.05
IPI-549	114	121	QVVQTLDC	8.83	1	6	9.04	9.24	1.085	18.091	0.885	Medium	9.04	9.24	1.199	19.991	0.8703	Medium	9.05	9.24	1.219	20.311	0.8209	Medium	9.04	9.24	1.445	24.078	0.8762	Medium	9.04	9.24	1.449	24.148	0.8504	Medium	9.05	9.24	1.444	24.072	0.8644	Medium	9.04	9.24	1.709	28.477	0.8246	Medium	9.04
IPI-549	122	137	LRYWKATHRSPGQIHL	7.53	4	13	7.78	8.1	0.849	6.53	0.9051	Medium	7.78	8.1	0.825	6.345	0.8675	Medium	7.79	8.11	0.937	7.204	0.869	Medium	7.78	8.1	1.619	12.454	0.8792	Medium	7.79	8.1	1.63	12.535	0.875	Medium	7.78	8.1	1.599	12.3	0.8793	Medium	7.78	8.1	3.213	24.714	0.8764	Medium	7.79
IPI-549	122	149	LRYWKATHRSPGQIHLVQRHPPSEESQA	6.41	5	23	6.52	6.91	2.395	10.411	0.8893	Medium	6.52	6.91	2.534	11.016	0.884	Medium	6.52	6.91	2.454	10.668	0.7969	Medium	6.52	6.92	4.111	17.875	0.8817	Medium	6.52	6.91	4.058	17.645	0.8688	Medium	6.52	6.91	3.86	16.784	0.8407	Medium	6.52	6.92	6.456	28.07	0.832	Medium	6.52
IPI-549	125	149	WKATHRSPGQIHLVQRHPPSEESQA	5.89	4	20	5.92	6.26	2.722	13.612	0.8306	Medium	5.91	6.26	2.939	14.694	0.8187	Medium	5.92	6.26	3.158	15.791	0.7458	Medium	5.92	6.26	4.275	21.375	0.8225	Medium	5.91	6.26	4.401	22.003	0.8166	Medium	5.91	6.26	4.257	21.285	0.8029	Medium	5.92	6.26	5.879	29.396	0.7931	Medium	5.91
IPI-549	138	149	VQRHPPSEESQA	3.99	2	8	4.14	4.49	3.215	40.187	0.9334	High	4.13	4.49	3.298	41.223	0.9327	High	4.14	4.49	3.332	41.651	0.9224	Medium	4.14	4.49	4.02	50.249	0.9343	High	4.13	4.49	3.921	49.007	0.9382	High	4.14	4.48	4.089	51.111	0.9355	High	4.14	4.49	4.943	61.784	0.9315	High	4.13
IPI-549	138	150	VQRHPPSEESQAF	6.68	2	9	6.87	7.15	2.954	32.825	0.796	Medium	7	7.06	3.087	34.296	0.8342	Medium	7.01	7.08	3.179	35.322	0.8313	Medium	6.87	7.15	4.199	46.66	0.7973	Medium	6.87	7.15	4.209	46.768	0.8089	Medium	6.87	7.15	4.124	45.817	0.8099	Medium	6.88	7.15	5.512	61.243	0.8063	Medium	6.87
IPI-549	150	157	FQRQLTAL	9.15	2	6	9.5	9.54	0.138	2.3	0.9106	Medium	9.5	9.54	0.164	2.731	0.9071	Medium	9.5	9.54	0.229	3.811	0.9018	Medium	9.5	9.54	0.314	5.239	0.9061	Medium	9.5	9.54	0.323	5.383	0.9073	Medium	9.5	9.55	0.352	5.859	0.9152	Medium	9.5	9.54	1.103	18.376	0.906	Medium	9.5
IPI-549	151	157	QRQLTAL	8.12	2	5	8.3	8.51	0.131	2.626	0.918	Medium	8.3	8.51	0.193	3.867	0.9305	Medium	8.3	8.51	0.263	5.264	0.9159	Medium	8.3	8.51	0.347	6.94	0.9289	Medium	8.3	8.51	0.378	7.567	0.9266	Medium	8.3	8.5	0.367	7.345	0.9332	Medium	8.3	8.51	1.066	21.321	0.9203	Medium	8.3
IPI-549	158	164	IGYDVTD	8.23	1	5	8.46	8.68	0.702	14.042	0.9301	High	8.46	8.68	0.756	15.125	0.9339	High	8.46	8.68	0.837	16.748	0.9101	Medium	8.46	8.68	1.002	20.05	0.9178	Medium	8.46	8.68	1.049	20.977	0.9213	High	8.45	8.68	1.066	21.313	0.9087	High	8.46	8.68	2.234	44.678	0.9186	High	8.46
IPI-549	158	173	IGYDVTDVSNVHDDEL	10.34	2	14	10.49	10.84	3.306	23.614	0.8665	Medium	10.49	10.84	3.388	24.199	0.8664	Medium	10.49	10.84	3.439	24.561	0.8178	Medium	10.49	10.84	4.612	32.943	0.8545	Medium	10.49	10.84	4.634	33.098	0.8488	Medium	10.49	10.85	4.637	33.122	0.852	Medium	10.49	10.84	5.916	42.26	0.8406	Medium	10.49
IPI-549	158	174	IGYDVTDVSNVHDDELE	9.9	2	15	10.1	10.43	3.502	23.349	0.9021	Medium	10.09	10.43	3.488	23.254	0.9023	Medium	10.09	10.43	3.494	23.297	0.8782	Medium	10.09	10.43	4.677	31.179	0.9173	Medium	10.09	10.43	4.694	31.293	0.9071	Medium	10.1	10.43	4.721	31.471	0.9053	Medium	10.09	10.43	6.166	41.103	0.9003	Medium	10.09
IPI-549	158	175	IGYDVTDVSNVHDDELEF	12.15	2	16	12.28	12.54	3.193	19.953	0.8714	Medium	12.27	12.53	3.304	20.65	0.8672	Medium	12.28	12.54	3.257	20.354	0.8177	Medium	12.28	12.54	4.476	27.974	0.8783	Medium	12.28	12.54	4.529	28.304	0.8617	Medium	12.28	12.54	4.572	28.578	0.8491	Medium	12.28	12.54	5.964	37.276	0.8325	Medium	12.28
IPI-549	161	173	DVTDVSNVHDDEL	9.02	1	11	9.19	9.42	3.107	28.249	0.8033	Medium	9.19	9.42	3.14	28.546	0.815	Medium	9.19	9.42	3.255	29.592	0.7931	Medium	9.19	9.42	4.242	38.56	0.8014	Medium	9.19	9.42	4.267	38.792	0.8027	Medium	9.19	9.43	4.297	39.059	0.8047	Medium	9.19	9.42	4.983	45.299	0.813	Medium	9.27
IPI-549	161	174	DVTDVSNVHDDELE	8.39	2	12	8.57	8.87	3.174	26.452	0.9029	High	8.56	8.87	3.256	27.137	0.9289	High	8.57	8.87	3.287	27.391	0.9302	High	8.56	8.87	4.294	35.787	0.919	High	8.57	8.87	4.317	35.974	0.9301	High	8.57	8.87	4.294	35.779	0.927	High	8.57	8.87	5.418	45.149	0.9177	High	8.57
IPI-549	161	175	DVTDVSNVHDDELEF	11.36	2	13	11.56	11.84	2.915	22.424	0.8876	Medium	11.55	11.84	2.983	22.944	0.8931	Medium	11.55	11.84	3.018	23.219	0.8911	Medium	11.56	11.84	3.989	30.682	0.8833	Medium	11.55	11.84	4.046	31.121	0.8885	Medium	11.56	11.84	4.095	31.499	0.8924	Medium	11.56	11.84	4.858	37.371	0.8768	Medium	11.56
IPI-549	165	173	VSNVHDDEL	7.22	2	7	7.38	7.61	1.368	19.537	0.8245	Medium	7.38	7.61	1.478	21.108	0.8234	Medium	7.38	7.61	1.446	20.664	0.799	Medium	7.38	7.61	2.446	34.94	0.7881	Medium	7.38	7.61	2.488	35.546	0.7897	Medium	7.38	7.61	2.401	34.297	0.8044	Medium	7.38	7.61	2.95	42.142	0.8047	Medium	7.38
IPI-549	165	175	VSNVHDDELEF	10.56	2	9	10.79	10.99	1.31	14.552	0.7741	Medium	10.79	10.99	1.248	13.87	0.7887	Medium	10.79	10.99	1.23	13.664	0.7288	Medium	10.79	10.99	2.166	24.062	0.7777	Medium	10.79	10.99	2.201	24.456	0.7716	Medium	10.8	11	2.217	24.628	0.7833	Medium	10.79	10.99	2.669	29.659	0.796	Medium	10.79
IPI-549	174	182	EFTRRGLVT	7	2	7	7.23	7.5	0.255	3.645	0.8936	Medium	7.23	7.5	0.24	3.428	0.8981	Medium	7.23	7.5	0.369	5.268	0.8892	Medium	7.23	7.5	0.265	3.789	0.9018	Medium	7.23	7.5	0.328	4.685	0.9037	Medium	7.23	7.5	0.348	4.966	0.9037	Medium	7.23	7.5	0.77	11.007	0.8836	Medium	7.23
IPI-549	174	195	EFTRRGLVTPRMAEVASRDPKL	8.28	5	18	8.36	8.78	1.249	6.94	0.8258	Medium	8.36	8.77	1.279	7.106	0.8094	Medium	8.36	8.78	1.368	7.599	0.7307	Medium	8.35	8.77	1.96	10.888	0.8204	Medium	8.36	8.78	1.93	10.723	0.8258	Medium	8.35	8.78	2.04	11.332	0.7912	Medium	8.36	8.78	3.543	19.684	0.7449	Medium	8.57
IPI-549	175	182	FTRRGLVT	6.2	1	6	6.52	6.6	0.237	3.944	0.8689	Medium	6.53	6.6	0.222	3.703	0.8668	Medium	6.53	6.6	0.328	5.461	0.852	Medium	6.53	6.61	0.28	4.669	0.8306	Medium	6.53	6.6	0.31	5.174	0.8642	Medium	6.52	6.6	0.395	6.581	0.8668	Medium	6.53	6.61	0.688	11.463	0.8371	Medium	6.53
IPI-549	175	185	FTRRGLVTPRM	7.37	3	8	7.39	7.72	0.025	0.307	0.7566	Medium	7.39	7.72	0.09	1.131	0.7294	Medium	7.39	7.72	0.079	0.987	0.6058	Medium	7.39	7.72	0.053	0.662	0.7396	Medium	7.39	7.72	0.078	0.973	0.7052	Medium	7.39	7.72	0.096	1.204	0.707	Medium	7.39	7.72	0.384	4.797	0.6539	Medium	7.39
IPI-549	176	182	TRRGLVT	4.73	2	5	5.02	5.27	0.17	3.394	0.9472	Medium	5.02	5.27	0.209	4.174	0.9436	Medium	5.02	5.27	0.291	5.82	0.9446	Medium	5.02	5.27	0.254	5.079	0.9215	Medium	5.02	5.27	0.285	5.699	0.9488	Medium	5.02	5.27	0.319	6.372	0.9481	Medium	5.02	5.27	0.655	13.103	0.9364	Medium	5.02
IPI-549	176	185	TRRGLVTPRM	6.52	2	7	6.86	6.89	0.313	4.477	0.7886	Medium	6.86	6.89	0.31	4.427	0.7559	Medium	6.87	6.94	0.415	5.931	0.6918	Medium	6.86	6.88	0.265	3.782	0.7561	Medium	6.86	6.89	0.404	5.767	0.7619	Medium	6.84	6.9	0.402	5.745	0.7659	Medium	6.87	6.89	0.825	11.785	0.7307	Medium	6.86
IPI-549	176	187	TRRGLVTPRMAE	6.56	3	9	6.64	6.75	0.276	3.068	0.9091	Medium	6.64	6.75	0.31	3.443	0.9053	Medium	6.65	6.75	0.414	4.604	0.8396	Medium	6.65	6.76	0.351	3.895	0.8836	Medium	6.64	6.75	0.444	4.938	0.8881	Medium	6.64	6.75	0.489	5.437	0.9	Medium	6.65	6.76	0.991	11.01	0.8646	Medium	6.64
IPI-549	186	195	AEVASRDPKL	5.99	2	7	6.25	6.46	1.218	17.393	0.9358	Medium	6.25	6.46	1.26	17.999	0.9351	Medium	6.25	6.46	1.334	19.055	0.9435	Medium	6.25	6.46	1.851	26.45	0.9245	Medium	6.25	6.46	1.887	26.955	0.9261	Medium	6.25	6.46	1.847	26.391	0.9295	Medium	6.25	6.46	2.993	42.757	0.9492	Medium	6.25
IPI-549	188	195	VASRDPKL	5.31	2	5	5.54	5.77	1.134	22.689	0.9224	Medium	5.66	5.74	1.122	22.434	0.7847	Medium	5.54	5.76	1.228	24.569	0.9307	Medium	5.54	5.77	1.704	34.08	0.9262	Medium	5.54	5.76	1.682	33.645	0.9131	Medium	5.53	5.76	1.679	33.571	0.923	Medium	5.54	5.77	2.428	48.556	0.9386	Medium	5.54
IPI-549	196	211	YAMHPWVTSKPLPEYL	11.83	2	11	11.82	12.33	3.066	27.869	0.9353	High	11.81	12.32	3.141	28.554	0.9316	High	11.81	12.33	3.162	28.743	0.9354	High	11.82	12.33	4.01	36.458	0.9114	High	11.81	12.33	4.078	37.074	0.9299	High	11.82	12.33	4.051	36.829	0.9203	High	11.82	12.33	5.419	49.265	0.9324	High	11.82
IPI-549	196	221	YAMHPWVTSKPLPEYLWKKIANNCIF	13.03	4	21	13.26	13.52	6.898	32.846	0.7755	Medium	13.26	13.52	7.131	33.958	0.8031	Medium	13.27	13.53	7.144	34.021	0.7674	Medium	13.27	13.53	9.03	43	0.7721	Medium	13.27	13.53	9.14	43.525	0.7637	Medium	13.27	13.53	9.272	44.15	0.8035	Medium	13.27	13.53	12.261	58.384	0.7806	Medium	13.27
IPI-549	212	221	WKKIANNCIF	10.5	1	8	10.61	11	1.892	23.654	0.8648	Medium	10.6	11	1.946	24.33	0.8707	Medium	10.61	11	1.969	24.615	0.8685	Medium	10.61	11	2.981	37.263	0.8501	Medium	10.61	11	3.005	37.559	0.8534	Medium	10.61	11	2.952	36.894	0.8678	Medium	10.61	11	4.498	56.226	0.845	Medium	10.61
IPI-549	222	232	IVIHRSTTSQT	4.69	2	9	4.89	4.95	3.008	33.42	0.9271	High	4.81	5.11	3.083	34.253	0.9034	Medium	4.81	5.11	3.114	34.599	0.9256	Medium	4.92	4.99	3.208	35.642	0.8985	Medium	4.81	5.11	3.086	34.291	0.9185	Medium	4.94	5	3.179	35.323	0.9394	High	4.81	5.11	3.487	38.744	0.9034	Medium	4.81
IPI-549	222	245	IVIHRSTTSQTIKVSPDDTPGAIL	9.09	4	20	9.11	9.59	2.525	12.627	0.9111	High	9.11	9.59	2.549	12.743	0.9071	High	9.11	9.59	2.622	13.112	0.9095	High	9.11	9.59	3.271	16.354	0.9122	High	9.11	9.59	3.311	16.555	0.9112	High	9.12	9.6	3.293	16.467	0.9086	High	9.11	9.59	4.173	20.867	0.9155	High	9.11
IPI-549	233	245	IKVSPDDTPGAIL	9.96	2	9	10.16	10.46	0.937	10.416	0.9079	Medium	10.16	10.46	0.975	10.828	0.8989	Medium	10.16	10.46	1.133	12.592	0.8987	Medium	10.16	10.46	1.172	13.021	0.9044	Medium	10.16	10.46	1.242	13.798	0.9003	Medium	10.17	10.47	1.254	13.938	0.9063	Medium	10.16	10.46	2.038	22.65	0.9107	Medium	10.16
IPI-549	249	269	FTKMAKKKSLMDIPESQSEQD	7.32	3	18	7.46	7.82	9.818	54.543	0.9267	High	7.72	7.79	10.096	56.089	0.9167	High	7.46	7.82	9.976	55.423	0.9029	High	7.46	7.82	10.478	58.212	0.9292	High	7.46	7.82	10.414	57.858	0.9203	High	7.46	7.82	10.231	56.841	0.9284	High	7.46	7.82	10.73	59.61	0.9327	High	7.46
IPI-549	250	269	TKMAKKKSLMDIPESQSEQD	7.4	2	17	7.26	7.49	9.282	54.601	0.765	Medium	7.26	7.49	9.608	56.52	0.7702	Medium	7.26	7.49	9.425	55.442	0.706	Medium	7.25	7.49	10.106	59.449	0.7666	Medium	7.26	7.49	10.031	59.004	0.7666	Medium	7.25	7.49	9.771	57.475	0.7684	Medium	7.25	7.49	10.531	61.947	0.7256	Medium	7.38
IPI-549	270	278	FVLRVCGRD	8.8	3	7	8.98	9.3	0.28	3.996	0.8498	Medium	8.98	9.3	0.319	4.552	0.8578	Medium	8.98	9.3	0.429	6.123	0.8437	Medium	8.98	9.3	0.381	5.446	0.8519	Medium	8.98	9.3	0.43	6.14	0.8524	Medium	8.98	9.3	0.45	6.435	0.8526	Medium	8.98	9.3	0.866	12.377	0.855	Medium	8.98
IPI-549	270	281	FVLRVCGRDEYL	11.19	3	10	11.41	11.65	0.24	2.405	0.9301	High	11.4	11.64	0.286	2.858	0.9165	High	11.4	11.65	0.349	3.49	0.9071	High	11.4	11.65	0.292	2.916	0.9287	High	11.4	11.65	0.346	3.459	0.9283	High	11.41	11.65	0.389	3.89	0.937	High	11.4	11.65	0.719	7.19	0.93	High	11.4
IPI-549	273	281	RVCGRDEYL	8.04	3	7	7.85	8.22	0.245	3.506	0.7597	Medium	7.85	8.22	0.21	2.993	0.7618	Medium	7.85	8.22	0.331	4.727	0.7656	Medium	7.85	8.22	0.245	3.494	0.7917	Medium	7.85	8.22	0.23	3.283	0.8091	Medium	7.85	8.22	0.251	3.592	0.7971	Medium	7.85	8.22	0.578	8.26	0.7201	Medium	7.85
IPI-549	279	291	EYLVGETPIKNFQ	10.68	2	10	10.63	10.84	1.098	10.981	0.7496	Medium	10.63	10.84	1.253	12.528	0.7534	Medium	10.63	10.84	1.327	13.268	0.7271	Medium	10.63	10.84	1.546	15.465	0.7464	Medium	10.63	10.84	1.581	15.814	0.7602	Medium	10.64	10.85	1.571	15.707	0.7677	Medium	10.63	10.84	1.647	16.465	0.761	Medium	10.63
IPI-549	282	291	VGETPIKNFQ	8.12	2	7	8.16	8.62	0.641	9.154	0.8887	Medium	8.16	8.62	0.691	9.874	0.8799	Medium	8.16	8.62	0.755	10.789	0.887	Medium	8.16	8.62	0.696	9.949	0.8701	Medium	8.16	8.62	0.691	9.869	0.8796	Medium	8.16	8.61	0.723	10.328	0.8784	Medium	8.16	8.62	0.776	11.09	0.8863	Medium	8.16
IPI-549	282	307	VGETPIKNFQWVRHCLKNGEEIHVVL	11.35	5	23	11.41	11.85	1.102	4.79	0.8997	Medium	11.41	11.85	1.2	5.219	0.8827	Medium	11.41	11.85	1.264	5.495	0.8747	Medium	11.41	11.85	3.049	13.255	0.886	Medium	11.41	11.85	3.183	13.841	0.8737	Medium	11.42	11.85	3.177	13.812	0.883	Medium	11.41	11.85	4.275	18.586	0.859	Medium	11.41
IPI-549	292	302	WVRHCLKNGEE	5.42	2	9	5.62	5.93	0.693	7.7	0.8137	Medium	5.61	5.92	0.783	8.696	0.8179	Medium	5.61	5.92	0.824	9.154	0.8461	Medium	5.62	5.93	1.975	21.947	0.7979	Medium	5.61	5.92	1.9	21.113	0.8106	Medium	5.61	5.92	1.928	21.421	0.8045	Medium	5.62	5.93	2.377	26.413	0.868	Medium	5.61
IPI-549	292	307	WVRHCLKNGEEIHVVL	8.82	4	14	8.99	9.32	0.815	5.823	0.8796	Medium	8.99	9.32	0.917	6.551	0.8711	Medium	9	9.32	0.964	6.888	0.8433	Medium	8.99	9.32	2.519	17.991	0.8681	Medium	8.99	9.32	2.489	17.781	0.8591	Medium	9	9.33	2.467	17.619	0.8594	Medium	8.99	9.32	3.381	24.15	0.8481	Medium	8.99
IPI-549	308	315	DTPPDPAL	8.44	1	3	8.5	8.94	0.587	19.575	0.8982	Medium	8.5	8.93	0.614	20.462	0.8806	Medium	8.5	8.94	0.685	22.849	0.8802	Medium	8.5	8.93	1.243	41.431	0.8929	Medium	8.5	8.94	1.299	43.309	0.8909	Medium	8.5	8.94	1.272	42.396	0.8904	Medium	8.5	8.93	1.639	54.627	0.8936	Medium	8.5
IPI-549	316	335	DEVRKEEWPLVDDCTGVTGY	12.57	2	17	12.68	12.96	6.155	36.208	0.8547	Medium	12.68	12.95	6.296	37.036	0.847	Medium	12.68	12.96	6.265	36.852	0.8665	Medium	12.68	12.96	7.314	43.021	0.8489	Medium	12.68	12.96	7.451	43.828	0.8459	Medium	12.68	12.96	7.62	44.826	0.8589	Medium	12.68	12.96	8.504	50.025	0.8501	Medium	12.68
IPI-549	316	339	DEVRKEEWPLVDDCTGVTGYHEQL	11.93	2	21	11.78	12.29	6.625	31.547	0.8705	Medium	11.78	12.28	6.703	31.917	0.8953	High	11.78	12.28	6.606	31.457	0.8299	Medium	11.78	12.29	8.186	38.981	0.893	High	11.78	12.28	8.36	39.808	0.8732	High	11.79	12.29	8.487	40.412	0.8896	High	11.78	12.29	9.885	47.074	0.8621	Medium	11.78
IPI-549	316	350	DEVRKEEWPLVDDCTGVTGYHEQLTIHGKDHESVF	11.04	5	32	11.23	11.57	6.74	21.062	0.8931	High	11.23	11.56	6.827	21.334	0.8911	High	11.23	11.56	6.647	20.773	0.8549	Medium	11.23	11.56	8.886	27.77	0.8956	High	11.23	11.56	9.064	28.325	0.8841	High	11.23	11.57	9.034	28.231	0.887	High	11.23	11.56	11.475	35.86	0.846	Medium	11.23
IPI-549	336	350	HEQLTIHGKDHESVF	7.44	2	13	7.65	7.94	1.584	12.188	0.7603	Medium	7.76	7.84	1.781	13.7	0.7903	Medium	7.8	7.87	1.73	13.304	0.8026	Medium	7.65	7.93	2.847	21.898	0.7631	Medium	7.65	7.94	2.916	22.429	0.7536	Medium	7.65	7.93	2.812	21.627	0.7417	Medium	7.83	7.9	4.636	35.663	0.782	Medium	7.87
IPI-549	340	350	TIHGKDHESVF	6.78	2	9	6.9	7.19	1.27	14.108	0.8631	Medium	6.9	7.19	1.353	15.028	0.8574	Medium	6.91	7.19	1.369	15.21	0.8496	Medium	6.9	7.19	1.965	21.832	0.839	Medium	6.9	7.19	1.952	21.688	0.8455	Medium	6.9	7.19	1.932	21.466	0.8519	Medium	6.91	7.2	2.549	28.324	0.837	Medium	6.9
IPI-549	355	361	WDCDRKF	8.97	3	5	8.99	9.11	0.429	8.582	0.8732	Medium	8.98	9.11	0.552	11.041	0.8314	Medium	8.99	9.11	0.509	10.173	0.8913	Medium	8.98	9.11	0.867	17.335	0.818	Medium	8.99	9.11	0.994	19.87	0.8558	Medium	8.99	9.12	0.961	19.225	0.8444	Medium	8.99	9.11	1.512	30.236	0.7963	Medium	8.99
IPI-549	355	379	WDCDRKFRVKIRGIDIPVLPRNTDL	10.5	4	21	10.63	10.7	2.719	12.948	0.7293	Medium	10.68	10.8	2.731	13.005	0.7628	Medium	10.68	10.8	2.838	13.514	0.6676	Medium	10.6	10.67	3.622	17.247	0.6577	Medium	10.68	10.8	3.833	18.253	0.7436	Medium	10.69	10.8	3.675	17.5	0.734	Medium	10.67	10.74	4.317	20.557	0.599	Medium	10.68
IPI-549	355	381	WDCDRKFRVKIRGIDIPVLPRNTDLTV	10.77	4	23	10.99	11.24	2.895	12.587	0.6821	Medium	10.98	11.23	3.016	13.111	0.7038	Medium	10.98	11.24	3.019	13.128	0.6739	Medium	10.98	11.24	4.273	18.58	0.6718	Medium	10.98	11.24	4.469	19.432	0.682	Medium	10.99	11.24	4.434	19.278	0.6962	Medium	10.98	11.24	5.602	24.357	0.6002	Medium	10.98
IPI-549	370	381	IPVLPRNTDLTV	10.11	2	9	10.41	10.52	3.498	38.864	0.8854	Medium	10.41	10.52	3.552	39.465	0.8943	Medium	10.41	10.52	3.62	40.224	0.9021	Medium	10.41	10.52	4.439	49.325	0.8569	Medium	10.41	10.52	4.465	49.614	0.8921	Medium	10.42	10.53	4.423	49.147	0.8746	Medium	10.41	10.52	5.412	60.13	0.8251	Medium	10.41
IPI-549	380	394	TVFVEANIQHGQQVL	10.36	2	13	10.45	10.6	1.112	8.554	0.7875	Medium	10.44	10.6	1.217	9.364	0.821	Medium	10.45	10.6	1.123	8.635	0.8048	Medium	10.45	10.6	1.435	11.035	0.7816	Medium	10.45	10.6	1.421	10.932	0.8293	Medium	10.45	10.6	1.442	11.094	0.8062	Medium	10.45	10.6	1.582	12.173	0.7243	Medium	10.45
IPI-549	382	394	FVEANIQHGQQVL	9.2	2	11	9.35	9.58	1.236	11.238	0.9303	Medium	9.35	9.58	1.314	11.945	0.9275	High	9.35	9.58	1.387	12.609	0.9228	Medium	9.35	9.58	1.874	17.039	0.932	High	9.35	9.58	1.936	17.6	0.9236	High	9.35	9.59	1.943	17.667	0.9168	High	9.35	9.58	2.129	19.356	0.9117	Medium	9.35
IPI-549	383	394	VEANIQHGQQVL	7.96	2	10	8.12	8.36	1.305	13.05	0.9232	High	8.12	8.36	1.386	13.857	0.9191	High	8.12	8.36	1.481	14.811	0.9171	High	8.12	8.35	2.168	21.682	0.9215	High	8.12	8.36	2.221	22.207	0.9206	High	8.12	8.35	2.237	22.367	0.9219	High	8.12	8.36	2.492	24.915	0.9187	Medium	8.12
IPI-549	386	394	NIQHGQQVL	7.43	1	7	7.46	7.59	1.24	17.719	0.781	Medium	7.46	7.59	1.323	18.907	0.7171	Medium	7.59	7.66	1.374	19.624	0.8112	Medium	7.46	7.59	1.989	28.417	0.7668	Medium	7.46	7.59	2.061	29.443	0.7034	Medium	7.46	7.59	2.035	29.066	0.7314	Medium	7.55	7.62	2.266	32.376	0.7269	Medium	7.46
IPI-549	395	406	CQRRTSPKPFTE	5.38	2	8	5.52	5.55	1.178	14.731	0.8528	Medium	5.51	5.54	1.257	15.715	0.8267	Medium	5.51	5.55	1.38	17.251	0.6539	Medium	5.54	5.61	1.657	20.719	0.8994	Medium	5.55	5.62	1.731	21.637	0.8359	Medium	5.55	5.62	1.734	21.677	0.8583	Medium	5.57	5.63	2.381	29.757	0.8644	Medium	5.53
IPI-549	408	413	VLWNVW	14.34	1	4	14.55	14.72	0.424	10.608	0.89	Medium	14.55	14.72	0.467	11.687	0.8896	Medium	14.55	14.72	0.443	11.068	0.8815	Medium	14.55	14.72	1.199	29.984	0.8944	Medium	14.55	14.72	1.202	30.056	0.8884	Medium	14.55	14.72	1.181	29.531	0.8846	Medium	14.55	14.72	1.647	41.184	0.8652	Medium	14.55
IPI-549	414	428	LEFSIKIKDLPKGAL	10.7	3	12	10.94	11.12	0.787	6.557	0.8968	Medium	10.93	11.12	0.828	6.903	0.8978	Medium	10.93	11.12	0.875	7.289	0.8836	Medium	10.93	11.12	0.923	7.691	0.8732	Medium	10.93	11.12	1.02	8.498	0.826	Medium	10.94	11.12	1.008	8.401	0.8302	Medium	10.93	11.12	1.511	12.595	0.807	Medium	10.93
IPI-549	417	428	SIKIKDLPKGAL	8.23	3	9	8.44	8.68	0.166	1.849	0.9385	High	8.44	8.68	0.245	2.724	0.922	High	8.44	8.68	0.31	3.44	0.9339	High	8.44	8.68	0.185	2.058	0.94	High	8.44	8.68	0.248	2.759	0.9381	High	8.44	8.68	0.28	3.108	0.9355	High	8.44	8.68	0.438	4.863	0.9272	High	8.44
IPI-549	417	429	SIKIKDLPKGALL	9.67	3	10	9.63	9.67	0.214	2.145	0.8818	Medium	9.63	9.66	0.255	2.553	0.8656	Medium	9.63	9.67	0.333	3.333	0.8273	Medium	9.63	9.67	0.173	1.729	0.8902	Medium	9.63	9.67	0.264	2.636	0.9082	Medium	9.64	9.67	0.287	2.866	0.9017	Medium	9.63	9.67	0.536	5.359	0.8262	Medium	9.63
IPI-549	432	441	QIYCGKAPAL	9.16	1	7	9.38	9.43	3.243	46.332	0.7978	Medium	9.38	9.43	3.307	47.244	0.8047	Medium	9.45	9.52	3.274	46.77	0.833	Medium	9.38	9.43	3.374	48.194	0.7857	Medium	9.43	9.5	3.455	49.362	0.7924	Medium	9.39	9.44	3.432	49.028	0.8129	Medium	9.41	9.47	3.64	52.001	0.764	Medium	9.42
IPI-549	461	467	LYYVNLL	14.24	2	5	14.11	14.33	0.046	0.927	0.7887	Medium	14.11	14.33	0.118	2.367	0.7863	Medium	14.11	14.33	0.054	1.081	0.7583	Medium	14.11	14.33	0.026	0.528	0.7765	Medium	14.11	14.33	0.081	1.61	0.7764	Medium	14.12	14.34	0.065	1.304	0.7481	Medium	14.11	14.33	0.322	6.449	0.6505	Medium	14.11
IPI-549	463	468	YVNLLL	13.46	1	4	13.78	13.82	0.069	1.722	0.867	Medium	13.79	13.82	0.052	1.293	0.8356	Medium	13.79	13.82	0.083	2.072	0.6997	Medium	13.79	13.82	0.066	1.638	0.8717	Medium	13.79	13.82	0.094	2.34	0.8292	Medium	13.79	13.82	0.1	2.51	0.8278	Medium	13.79	13.82	0.354	8.851	0.756	Medium	13.79
IPI-549	467	475	LLIDHRFLL	12.02	3	7	12.38	12.47	0.23	3.292	0.8568	Medium	12.38	12.47	0.101	1.449	0.8671	Medium	12.38	12.47	0.154	2.205	0.8334	Medium	12.38	12.47	0.138	1.966	0.8573	Medium	12.38	12.47	0.16	2.285	0.836	Medium	12.38	12.47	0.135	1.933	0.8436	Medium	12.38	12.47	0.286	4.084	0.8059	Medium	12.38
IPI-549	467	479	LLIDHRFLLRRGE	9	4	11	9.35	9.43	0.38	3.452	0.9418	High	9.35	9.43	0.415	3.769	0.9258	High	9.35	9.43	0.456	4.143	0.8905	Medium	9.35	9.43	0.945	8.591	0.9318	High	9.35	9.43	0.997	9.067	0.9186	High	9.35	9.44	0.949	8.63	0.9246	High	9.35	9.43	1.343	12.205	0.8994	Medium	9.35
IPI-549	467	480	LLIDHRFLLRRGEY	9.59	4	12	9.82	10.09	0.394	3.287	0.9243	Medium	9.82	10.08	0.441	3.676	0.9148	Medium	9.82	10.09	0.504	4.197	0.912	Medium	9.82	10.09	0.908	7.564	0.9272	Medium	9.82	10.09	0.937	7.811	0.915	Medium	9.82	10.09	0.973	8.111	0.9137	Medium	9.82	10.09	1.376	11.463	0.9096	Medium	9.82
IPI-549	485	497	WQISGKGEDQGSF	9.8	2	11	10.17	10.25	6.67	60.637	0.8039	Medium	10.17	10.24	6.527	59.337	0.7983	Medium	10.17	10.25	6.444	58.582	0.7975	Medium	10.17	10.24	6.738	61.255	0.833	Medium	10.17	10.24	6.585	59.86	0.827	Medium	10.17	10.25	6.715	61.048	0.8178	Medium	10.17	10.25	7.099	64.536	0.8135	Medium	10.17
IPI-549	498	513	NADKLTSATNPDKENS	5.28	2	13	5.44	5.51	2.917	22.438	0.7691	Medium	5.49	5.59	2.722	20.939	0.7882	Medium	5.5	5.6	2.796	21.51	0.7261	Medium	5.5	5.6	3.783	29.101	0.8281	Medium	5.49	5.59	3.864	29.721	0.8093	Medium	5.5	5.59	3.855	29.656	0.7749	Medium	5.5	5.6	4.99	38.386	0.7198	Medium	5.49
IPI-549	498	514	NADKLTSATNPDKENSM	6.42	3	14	6.62	6.79	2.587	18.479	0.8019	Medium	6.63	6.79	2.753	19.662	0.8222	Medium	6.63	6.8	2.891	20.65	0.8024	Medium	6.63	6.8	4.155	29.681	0.8061	Medium	6.63	6.8	4.254	30.385	0.8163	Medium	6.63	6.79	4.102	29.297	0.7642	Medium	6.63	6.8	5.561	39.718	0.7552	Medium	6.63
IPI-549	498	515	NADKLTSATNPDKENSMS	6.15	3	15	6.26	6.54	2.55	16.999	0.9242	High	6.26	6.54	2.763	18.421	0.9204	High	6.26	6.54	2.88	19.198	0.9216	High	6.26	6.55	4.125	27.5	0.9236	High	6.26	6.54	4.213	28.084	0.9321	High	6.26	6.54	4.182	27.881	0.9228	High	6.26	6.55	5.498	36.652	0.9224	High	6.26
IPI-549	498	517	NADKLTSATNPDKENSMSIS	7.37	3	17	7.59	7.67	2.422	14.247	0.8791	Medium	7.59	7.67	2.628	15.461	0.8723	Medium	7.59	7.67	2.664	15.67	0.8503	Medium	7.59	7.67	3.741	22.008	0.8743	Medium	7.59	7.67	3.941	23.185	0.8765	Medium	7.59	7.67	3.924	23.083	0.8587	Medium	7.59	7.67	5.274	31.025	0.808	Medium	7.59
IPI-549	498	519	NADKLTSATNPDKENSMSISIL	10.59	3	19	10.86	10.97	1.948	10.254	0.8387	Medium	10.86	10.96	2.028	10.676	0.8385	Medium	10.86	10.97	2.058	10.831	0.7699	Medium	10.86	10.97	2.987	15.72	0.8041	Medium	10.86	10.97	3.046	16.033	0.7945	Medium	10.86	10.97	3.087	16.247	0.8131	Medium	10.86	10.97	3.817	20.091	0.7562	Medium	10.86
IPI-549	520	551	LDNYCHPIALPKHQPTPDPEGDRVRAEMPNQL	8.94	4	24	9.05	9.19	9.188	38.282	0.8303	Medium	9.05	9.19	9.516	39.648	0.8395	Medium	9.05	9.19	9.545	39.769	0.7997	Medium	9.05	9.19	10.488	43.702	0.8213	Medium	9.05	9.19	10.677	44.49	0.8268	Medium	9.06	9.19	10.507	43.781	0.8483	Medium	9.05	9.19	11.457	47.737	0.8274	Medium	9.05
IPI-549	552	557	RKQLEA	4.4	2	4	4.25	4.69	0.502	12.56	0.9048	High	4.24	4.69	0.532	13.292	0.9028	High	4.24	4.69	0.577	14.427	0.8898	High	4.25	4.69	0.831	20.765	0.905	High	4.24	4.69	0.828	20.695	0.9014	High	4.25	4.68	0.86	21.505	0.9038	High	4.25	4.69	1.467	36.685	0.8832	High	4.24
IPI-549	557	575	AIIATDPLNPLTAEDKELL	12.88	2	15	12.81	12.89	2.689	17.93	0.6622	Medium	12.81	12.89	2.861	19.074	0.6617	Medium	12.81	12.89	3.142	20.945	0.6619	Medium	12.82	12.89	3.746	24.974	0.6165	Medium	12.81	12.89	3.948	26.318	0.6589	Medium	12.87	12.93	4.078	27.187	0.6484	Medium	12.82	12.89	6.547	43.648	0.6741	Medium	12.81
IPI-549	557	578	AIIATDPLNPLTAEDKELLWHF	13.73	3	18	13.99	14	2.603	14.461	0.7445	Medium	13.99	14	2.737	15.205	0.7076	Medium	14	14	2.942	16.344	0.6693	Medium	14	14.01	3.753	20.853	0.6917	Medium	14	14	3.988	22.155	0.6662	Medium	14	14.01	4.073	22.629	0.6878	Medium	14	14.01	6.325	35.139	0.6107	Medium	14
IPI-549	558	570	IIATDPLNPLTAE	11.61	1	9	11.84	11.93	2.896	32.183	0.8232	Medium	11.84	11.92	2.928	32.533	0.8868	Medium	11.84	11.92	3.07	34.11	0.8866	Medium	11.84	11.93	4.184	46.485	0.7838	Medium	11.84	11.92	4.176	46.402	0.8249	Medium	11.84	11.93	4.178	46.425	0.8695	Medium	11.84	11.93	6.254	69.484	0.8588	Medium	11.84
IPI-549	558	573	IIATDPLNPLTAEDKE	10.45	2	12	10.81	10.89	2.97	24.753	0.8399	Medium	10.81	10.89	3.069	25.577	0.8453	Medium	10.81	10.89	3.147	26.228	0.8736	Medium	10.81	10.89	4.168	34.733	0.8261	Medium	10.81	10.89	4.253	35.443	0.8426	Medium	10.81	10.9	4.228	35.237	0.8457	Medium	10.81	10.89	6.393	53.274	0.8439	Medium	10.81
IPI-549	558	578	IIATDPLNPLTAEDKELLWHF	13.76	3	17	14.03	14.14	2.51	14.763	0.8767	Medium	14.03	14.14	2.64	15.528	0.8743	Medium	14.03	14.14	2.674	15.731	0.8754	Medium	14.03	14.14	3.689	21.702	0.8593	Medium	14.03	14.14	3.766	22.151	0.8714	Medium	14.03	14.14	3.761	22.123	0.8625	Medium	14.03	14.14	5.968	35.105	0.8659	Medium	14.03
IPI-549	558	580	IIATDPLNPLTAEDKELLWHFRY	13.18	4	19	13.1	13.14	2.619	13.787	0.8585	Medium	13.1	13.14	2.788	14.673	0.8574	Medium	13.1	13.14	2.837	14.933	0.859	Medium	13.1	13.14	3.946	20.769	0.8256	Medium	13.1	13.14	4.123	21.702	0.8445	Medium	13.1	13.14	4.218	22.202	0.8376	Medium	13.1	13.14	6.752	35.538	0.8165	Medium	13.1
IPI-549	579	592	RYESLKHPKAYPKL	6.31	4	10	6.23	6.81	0.311	3.109	0.9037	Medium	6.22	6.81	0.363	3.634	0.9109	Medium	6.23	6.81	0.549	5.494	0.9132	Medium	6.23	6.82	1.018	10.176	0.9132	Medium	6.22	6.81	1.008	10.083	0.9082	Medium	6.22	6.81	1.005	10.046	0.915	Medium	6.23	6.82	2.004	20.044	0.908	Medium	6.22
IPI-549	593	601	FSSVKWGQQ	8.89	1	7	9.06	9.26	0.374	5.345	0.8349	Medium	9.06	9.26	0.416	5.938	0.8369	Medium	9.06	9.26	0.48	6.863	0.8363	Medium	9.06	9.26	0.92	13.15	0.8217	Medium	9.06	9.26	0.885	12.644	0.8225	Medium	9.07	9.27	0.892	12.736	0.8304	Medium	9.06	9.26	2.509	35.846	0.8329	Medium	9.06
IPI-549	593	605	FSSVKWGQQEIVA	10.39	2	11	10.57	10.87	0.849	7.719	0.8523	Medium	10.57	10.86	0.883	8.025	0.8601	Medium	10.57	10.87	0.954	8.675	0.8333	Medium	10.57	10.87	1.489	13.537	0.8507	Medium	10.57	10.87	1.5	13.633	0.8375	Medium	10.58	10.87	1.491	13.551	0.8421	Medium	10.57	10.87	3.017	27.429	0.8139	Medium	10.57
IPI-549	593	610	FSSVKWGQQEIVAKTYQL	10.78	2	16	10.99	11.08	0.846	5.285	0.8749	Medium	10.99	11.07	0.859	5.367	0.861	Medium	10.99	11.08	0.975	6.093	0.7428	Medium	10.99	11.08	1.5	9.378	0.8395	Medium	10.99	11.08	1.526	9.54	0.8339	Medium	11	11.08	1.51	9.439	0.8334	Medium	10.99	11.08	3.153	19.709	0.7483	Medium	10.99
IPI-549	593	611	FSSVKWGQQEIVAKTYQLL	12.25	3	17	12.56	12.65	0.668	3.93	0.846	Medium	12.55	12.64	0.663	3.901	0.8722	Medium	12.55	12.65	0.683	4.02	0.8574	Medium	12.56	12.65	1.225	7.207	0.8462	Medium	12.55	12.65	1.252	7.362	0.8562	Medium	12.56	12.65	1.271	7.475	0.8512	Medium	12.56	12.65	3.044	17.908	0.7834	Medium	12.55
IPI-549	602	607	EIVAKT	4.54	1	4	4.87	5.04	0.096	2.409	0.9087	Medium	4.86	5.03	0.149	3.734	0.8997	Medium	4.87	5.03	0.204	5.093	0.8991	Medium	4.87	5.04	0.203	5.069	0.894	Medium	4.86	5.03	0.23	5.749	0.9105	Medium	4.87	5.04	0.148	3.707	0.9028	Medium	4.87	5.04	0.499	12.475	0.9074	Medium	4.86
IPI-549	606	611	KTYQLL	9.74	2	4	10.14	10.22	0.144	3.59	0.8505	Medium	10.13	10.22	0.129	3.227	0.8346	Medium	10.19	10.27	0.18	4.504	0.8346	Medium	10.14	10.22	0.327	8.177	0.8464	Medium	10.14	10.22	0.226	5.659	0.8221	Medium	10.14	10.22	0.246	6.138	0.8076	Medium	10.2	10.27	0.76	18.995	0.8351	Medium	10.14
IPI-549	611	622	LARREVWDQSAL	9.42	2	10	9.6	9.83	6.043	60.426	0.8726	Medium	9.6	9.83	6.092	60.923	0.8791	Medium	9.6	9.83	6.089	60.893	0.8767	Medium	9.6	9.83	6.424	64.242	0.8573	Medium	9.6	9.83	6.52	65.198	0.8735	Medium	9.6	9.84	6.434	64.341	0.8687	Medium	9.6	9.83	6.465	64.649	0.876	Medium	9.6
IPI-549	612	622	ARREVWDQSAL	9.21	3	9	9.46	9.56	5.687	63.187	0.864	Medium	9.46	9.55	5.682	63.138	0.8712	Medium	9.47	9.56	5.589	62.097	0.7941	Medium	9.46	9.56	5.801	64.46	0.8752	Medium	9.46	9.56	5.875	65.277	0.8367	Medium	9.47	9.56	5.778	64.204	0.8664	Medium	9.46	9.56	5.887	65.406	0.8429	Medium	9.46
IPI-549	623	630	DVGLTMQL	12.15	1	6	12.35	12.43	0.375	6.244	0.8575	Medium	12.38	12.45	0.496	8.264	0.8638	Medium	12.49	12.55	0.407	6.779	0.8437	Medium	12.35	12.43	0.931	15.509	0.816	Medium	12.34	12.43	1.032	17.204	0.8854	Medium	12.39	12.46	1.088	18.13	0.8806	Medium	12.35	12.42	1.434	23.896	0.846	Medium	12.39
IPI-549	623	631	DVGLTMQLL	13.61	2	7	13.9	13.99	0.271	3.871	0.8276	Medium	13.98	14.05	0.358	5.117	0.8263	Medium	14	14.07	0.345	4.934	0.7715	Medium	13.91	13.99	0.965	13.781	0.804	Medium	13.9	13.99	0.831	11.869	0.8426	Medium	13.91	13.99	0.867	12.384	0.8351	Medium	13.91	13.99	1.317	18.815	0.7822	Medium	13.91
IPI-549	631	635	LDCNF	10.77	1	3	10.96	11.19	0.141	4.688	0.8728	Medium	10.96	11.18	0.182	6.071	0.8771	Medium	10.96	11.18	0.205	6.835	0.8804	Medium	10.96	11.19	0.339	11.313	0.8838	Medium	11.14	11.21	0.396	13.187	0.8668	Medium	10.96	11.19	0.394	13.136	0.8833	Medium	10.96	11.19	1.197	39.905	0.9021	Medium	10.96
IPI-549	636	642	SDENVRA	4.38	1	5	4.64	4.74	0.52	10.41	0.9521	High	4.64	4.74	0.611	12.228	0.9471	Medium	4.64	4.74	0.716	14.312	0.9223	Medium	4.64	4.74	0.604	12.077	0.9406	High	4.64	4.74	0.612	12.236	0.9342	Medium	4.64	4.74	0.688	13.768	0.9437	Medium	4.64	4.74	0.925	18.498	0.9245	Medium	4.64
IPI-549	643	657	IAVQKLESLEDDDVL	11.41	2	13	11.66	11.74	1.571	12.081	0.857	Medium	11.65	11.74	1.633	12.564	0.8575	Medium	11.65	11.74	1.681	12.929	0.8163	Medium	11.66	11.74	2.21	16.998	0.8558	Medium	11.65	11.74	2.236	17.203	0.8548	Medium	11.66	11.74	2.302	17.706	0.8409	Medium	11.66	11.74	2.662	20.478	0.8197	Medium	11.66
IPI-549	643	662	IAVQKLESLEDDDVLHYLLQ	13.55	3	18	13.63	13.94	1.176	6.534	0.8598	Medium	13.63	13.94	1.221	6.786	0.8439	Medium	13.64	13.94	1.207	6.705	0.8149	Medium	13.64	13.94	1.829	10.159	0.8405	Medium	13.64	13.94	1.886	10.477	0.8366	Medium	13.64	13.94	1.91	10.61	0.8211	Medium	13.64	13.94	2.86	15.889	0.7887	Medium	13.64
IPI-549	643	663	IAVQKLESLEDDDVLHYLLQL	14.29	3	19	14.3	14.46	1.093	5.751	0.7814	Medium	14.3	14.46	1.105	5.814	0.7889	Medium	14.3	14.46	1.045	5.498	0.7873	Medium	14.3	14.45	1.637	8.615	0.7648	Medium	14.3	14.46	1.655	8.713	0.7807	Medium	14.3	14.46	1.677	8.824	0.7702	Medium	14.29	14.45	2.78	14.633	0.7359	Medium	14.3
IPI-549	651	663	LEDDDVLHYLLQL	14.41	3	11	14.49	14.52	0.009	0.083	0.8452	Medium	14.49	14.52	0.044	0.399	0.8246	Medium	14.49	14.52	0.034	0.306	0.734	Medium	14.49	14.52	0.291	2.646	0.7478	Medium	14.49	14.52	0.138	1.251	0.7601	Medium	14.5	14.53	0.244	2.214	0.7847	Medium	14.49	14.52	1.405	12.77	0.6863	Medium	14.49
IPI-549	652	662	EDDDVLHYLLQ	13.33	2	9	13.51	13.55	0.174	1.931	0.7201	Medium	13.51	13.55	0.211	2.346	0.6715	Medium	13.51	13.55	0.417	4.634	0.6238	Medium	13.49	13.56	0.291	3.231	0.7025	Medium	13.51	13.55	0.418	4.648	0.7043	Medium	13.51	13.56	0.407	4.527	0.7112	Medium	13.51	13.56	1.358	15.085	0.6621	Medium	13.51
IPI-549	652	663	EDDDVLHYLLQL	14.38	2	10	14.41	14.49	0.467	4.675	0.6643	Medium	14.41	14.49	0.445	4.446	0.6622	Medium	14.52	14.59	0.427	4.265	0.6776	Medium	14.4	14.49	0.434	4.339	0.6554	Medium	14.41	14.49	0.556	5.557	0.6567	Medium	14.41	14.5	0.446	4.461	0.6443	Medium	14.4	14.49	1.302	13.023	0.5857	Medium	14.41
IPI-549	654	662	DDVLHYLLQ	12.98	2	7	13.36	13.36	0.113	1.614	0.8539	Medium	13.36	13.37	0.088	1.262	0.8213	Medium	13.36	13.37	0.182	2.601	0.8318	Medium	13.36	13.37	0.229	3.267	0.8253	Medium	13.36	13.37	0.199	2.849	0.8153	Medium	13.36	13.37	0.244	3.485	0.8154	Medium	13.36	13.37	1.001	14.297	0.7688	Medium	13.36
IPI-549	655	662	DVLHYLLQ	12.82	2	6	12.99	13.31	0.115	1.923	0.8963	Medium	13	13.32	0.096	1.6	0.8791	Medium	13	13.32	0.176	2.942	0.8777	Medium	13	13.32	0.231	3.85	0.8891	Medium	13	13.32	0.253	4.213	0.8804	Medium	13	13.32	0.256	4.262	0.8749	Medium	13	13.32	1.102	18.373	0.8772	Medium	13
IPI-549	655	663	DVLHYLLQL	14.29	2	7	14.41	14.77	0.087	1.246	0.9473	Medium	14.41	14.77	0.107	1.522	0.9362	Medium	14.41	14.77	0.128	1.826	0.9423	Medium	14.4	14.77	0.219	3.133	0.9358	Medium	14.41	14.77	0.239	3.419	0.938	Medium	14.41	14.77	0.253	3.614	0.9314	Medium	14.4	14.77	1.187	16.952	0.9333	Medium	14.41
IPI-549	658	663	HYLLQL	11.99	1	4	11.97	12.22	0.046	1.15	0.8429	Medium	11.96	12.22	0.047	1.181	0.8084	Medium	11.97	12.22	0.036	0.905	0.6593	Medium	11.97	12.22	0.107	2.676	0.8201	Medium	11.97	12.22	0.129	3.237	0.7734	Medium	11.97	12.22	0.113	2.829	0.7934	Medium	11.97	12.22	0.476	11.895	0.7716	Medium	11.97
IPI-549	663	677	LVQAVKFEPYHDSAL	9.69	3	12	10.1	10.14	0.313	2.612	0.8664	Medium	10.1	10.13	0.341	2.839	0.8595	Medium	10.1	10.14	0.503	4.188	0.8597	Medium	10.1	10.14	0.765	6.371	0.8666	Medium	10.1	10.14	0.757	6.305	0.8749	Medium	10.11	10.14	0.762	6.352	0.8615	Medium	10.1	10.14	1.045	8.709	0.8551	Medium	10.1
IPI-549	664	677	VQAVKFEPYHDSAL	9.26	2	11	9.43	9.68	0.327	2.971	0.9095	Medium	9.43	9.67	0.394	3.578	0.9168	Medium	9.43	9.67	0.444	4.038	0.9215	Medium	9.43	9.67	0.754	6.858	0.9036	Medium	9.43	9.67	0.812	7.379	0.9125	Medium	9.44	9.68	0.822	7.475	0.912	Medium	9.43	9.67	0.988	8.979	0.9086	Medium	9.43
IPI-549	666	677	AVKFEPYHDSAL	8.99	2	9	9.2	9.25	0.269	2.993	0.8591	Medium	9.2	9.25	0.397	4.414	0.845	Medium	9.21	9.26	0.436	4.849	0.7913	Medium	9.2	9.25	0.73	8.112	0.8442	Medium	9.2	9.25	0.754	8.383	0.841	Medium	9.21	9.26	0.848	9.427	0.8221	Medium	9.2	9.25	0.96	10.668	0.8433	Medium	9.2
IPI-549	681	697	LLKRGLRNKRIGHFLFW	10.28	5	15	10.55	10.78	0.087	0.58	0.8737	Medium	10.55	10.78	0.091	0.605	0.8654	Medium	10.55	10.78	0.177	1.18	0.8722	Medium	10.55	10.78	0.099	0.658	0.8837	Medium	10.55	10.78	0.108	0.723	0.8918	Medium	10.55	10.79	0.138	0.923	0.8666	Medium	10.55	10.78	0.168	1.117	0.8564	Medium	10.55
IPI-549	698	713	FLRSEIAQSRHYQQRF	7.69	4	14	7.76	8.19	0.669	4.778	0.8374	Medium	7.76	8.19	0.701	5.01	0.8197	Medium	7.76	8.19	0.837	5.979	0.7696	Medium	7.76	8.19	0.932	6.654	0.8459	Medium	7.76	8.19	0.986	7.043	0.8183	Medium	7.76	8.19	0.944	6.744	0.8211	Medium	7.76	8.19	2.333	16.665	0.8213	Medium	7.76
IPI-549	700	713	RSEIAQSRHYQQRF	5.94	4	12	6.07	6.34	0.458	3.818	0.9309	High	6.06	6.34	0.547	4.554	0.9007	High	6.07	6.34	0.617	5.146	0.8956	Medium	6.07	6.35	0.725	6.039	0.9246	High	6.07	6.34	0.773	6.44	0.9163	High	6.06	6.34	0.793	6.608	0.9173	Medium	6.07	6.35	1.822	15.185	0.9014	High	6.06
IPI-549	704	713	AQSRHYQQRF	6.13	3	8	6.14	6.18	0.493	6.157	0.8085	Medium	6.13	6.17	0.525	6.567	0.77	Medium	6.17	6.23	0.559	6.983	0.7633	Medium	6.14	6.18	0.675	8.438	0.8283	Medium	6.13	6.17	0.629	7.863	0.7976	Medium	6.13	6.17	0.735	9.19	0.7488	Medium	6.14	6.18	1.601	20.007	0.7746	Medium	6.13
IPI-549	714	719	AVILEA	9.26	1	4	9.52	9.58	0.03	0.748	0.8076	Medium	9.51	9.58	0.041	1.025	0.8079	Medium	9.52	9.58	0.008	0.208	0.679	Medium	9.51	9.58	0.041	1.031	0.8267	Medium	9.51	9.58	0.035	0.887	0.813	Medium	9.52	9.59	0.061	1.516	0.801	Medium	9.51	9.58	0.045	1.127	0.7895	Medium	9.51
IPI-549	720	729	YLRGCGTAML	9.99	2	8	10.43	10.55	0.269	3.365	0.8339	Medium	10.43	10.55	0.261	3.26	0.8587	Medium	10.43	10.55	0.344	4.298	0.8817	Medium	10.43	10.55	0.661	8.258	0.8287	Medium	10.43	10.55	0.683	8.534	0.8694	Medium	10.43	10.55	0.687	8.583	0.8518	Medium	10.43	10.55	1.321	16.514	0.8671	Medium	10.43
IPI-549	729	738	LHDFTQQVQV	9.15	2	8	9.38	9.51	0.101	1.265	0.8241	Medium	9.38	9.5	0.148	1.846	0.8185	Medium	9.38	9.51	0.29	3.629	0.7582	Medium	9.38	9.51	0.102	1.275	0.8014	Medium	9.38	9.51	0.147	1.837	0.801	Medium	9.39	9.51	0.187	2.343	0.8067	Medium	9.38	9.51	0.155	1.934	0.7837	Medium	9.38
IPI-549	730	737	HDFTQQVQ	6.37	1	6	6.61	6.77	0.121	2.011	0.7699	Medium	6.61	6.77	0.115	1.916	0.7425	Medium	6.79	6.86	0.103	1.713	0.633	Medium	6.62	6.78	0.112	1.87	0.7499	Medium	6.61	6.77	0.132	2.204	0.7299	Medium	6.61	6.77	0.159	2.653	0.7214	Medium	6.62	6.78	0.113	1.887	0.7041	Medium	6.64
IPI-549	730	738	HDFTQQVQV	8.35	2	7	8.5	8.73	0.091	1.295	0.8204	Medium	8.5	8.73	0.152	2.17	0.8207	Medium	8.5	8.74	0.209	2.988	0.7511	Medium	8.5	8.73	0.107	1.534	0.8195	Medium	8.5	8.73	0.11	1.57	0.8142	Medium	8.5	8.73	0.147	2.104	0.8088	Medium	8.5	8.73	0.224	3.201	0.7991	Medium	8.5
IPI-549	732	737	FTQQVQ	5.59	1	4	5.86	5.88	0.08	2.008	0.7778	Medium	5.85	5.87	0.078	1.943	0.7559	Medium	5.92	5.98	0.133	3.326	0.7365	Medium	5.86	5.88	0.041	1.024	0.8028	Medium	5.86	5.87	0.031	0.763	0.7556	Medium	5.85	5.87	0.057	1.424	0.7436	Medium	5.86	5.88	0.167	4.176	0.7401	Medium	5.85
IPI-549	736	741	VQVIEM	10.7	1	4	10.6	10.65	0.047	1.169	0.6424	Medium	10.6	10.65	0.103	2.581	0.6176	Medium	10.6	10.66	0.169	4.223	0.5387	Medium	10.6	10.65	0.112	2.794	0.6437	Medium	10.6	10.65	0.085	2.128	0.6178	Medium	10.6	10.65	0.174	4.355	0.6175	Medium	10.6	10.65	0.18	4.492	0.6176	Medium	10.6
IPI-549	741	747	MLQKVTL	9.12	2	5	9.32	9.41	0.333	6.651	0.8748	Medium	9.32	9.4	0.331	6.616	0.8725	Medium	9.32	9.41	0.401	8.029	0.7687	Medium	9.32	9.4	1.129	22.587	0.8739	Medium	9.32	9.41	1.186	23.725	0.8619	Medium	9.33	9.41	1.24	24.791	0.8738	Medium	9.32	9.41	2.201	44.027	0.8552	Medium	9.32
IPI-549	742	747	LQKVTL	8.23	1	4	8.52	8.7	0.291	7.276	0.9539	Medium	8.51	8.7	0.32	7.99	0.9463	Medium	8.52	8.7	0.347	8.684	0.9447	Medium	8.51	8.7	1.106	27.654	0.945	Medium	8.52	8.7	1.128	28.212	0.9546	Medium	8.51	8.7	1.09	27.245	0.9541	Medium	8.51	8.7	2.132	53.302	0.9174	Medium	8.52
IPI-549	742	782	LQKVTLDIKSLSAEKYDVSSQVISQLKQKLENLQNSQLPES	12.36	5	38	12.6	12.85	18.116	47.674	0.7889	Medium	12.59	12.85	18.649	49.076	0.7929	Medium	12.59	12.85	18.289	48.129	0.6895	Medium	12.6	12.86	23.703	62.375	0.7881	Medium	12.6	12.86	24.254	63.826	0.7768	Medium	12.6	12.86	24.224	63.748	0.7531	Medium	12.6	12.86	26.711	70.293	0.7393	Medium	12.6
IPI-549	748	761	DIKSLSAEKYDVSS	8	2	12	8.15	8.5	9.153	76.274	0.788	Medium	8.15	8.5	9.313	77.612	0.7787	Medium	8.16	8.5	9.294	77.45	0.7421	Medium	8.15	8.5	9.209	76.744	0.7807	Medium	8.15	8.5	9.099	75.827	0.768	Medium	8.15	8.5	9.25	77.084	0.7689	Medium	8.15	8.5	9.12	75.999	0.7624	Medium	8.15
IPI-549	748	767	DIKSLSAEKYDVSSQVISQL	11.14	3	18	11.31	11.41	13.817	76.762	0.916	High	11.31	11.4	14.038	77.988	0.908	High	11.31	11.4	13.935	77.414	0.8862	Medium	11.31	11.4	13.813	76.739	0.9117	High	11.31	11.4	14.072	78.175	0.9045	High	11.32	11.41	13.977	77.651	0.9061	High	11.31	11.4	13.872	77.065	0.9179	High	11.31
IPI-549	748	782	DIKSLSAEKYDVSSQVISQLKQKLENLQNSQLPES	12.56	5	32	12.54	13.04	17.872	55.849	0.9025	High	12.53	13.05	18.303	57.198	0.9008	High	12.54	13.05	17.95	56.094	0.8917	High	12.54	13.05	22.593	70.603	0.8997	High	12.54	13.05	22.77	71.155	0.8817	High	12.54	13.05	22.905	71.577	0.8984	High	12.54	13.05	24.839	77.623	0.9006	High	12.54
IPI-549	755	782	EKYDVSSQVISQLKQKLENLQNSQLPES	12.25	3	25	12.35	12.45	12.854	51.414	0.8429	Medium	12.34	12.44	13.305	53.22	0.8344	Medium	12.34	12.44	13.257	53.029	0.7356	Medium	12.35	12.45	17.54	70.159	0.8427	Medium	12.34	12.44	17.84	71.358	0.8317	Medium	12.35	12.45	17.773	71.09	0.83	Medium	12.35	12.45	19.713	78.851	0.807	Medium	12.34
IPI-549	762	767	QVISQL	9.32	1	4	9.57	9.6	3.216	80.403	0.7371	Medium	9.56	9.6	3.287	82.174	0.7761	Medium	9.65	9.72	3.292	82.29	0.7805	Medium	9.56	9.6	3.334	83.352	0.7557	Medium	9.56	9.6	3.344	83.595	0.7901	Medium	9.57	9.6	3.274	81.84	0.7791	Medium	9.56	9.6	3.409	85.231	0.7971	Medium	9.57
IPI-549	762	782	QVISQLKQKLENLQNSQLPES	10.6	3	18	10.72	10.81	8.625	47.917	0.7456	Medium	10.71	10.81	8.818	48.988	0.7371	Medium	10.72	10.81	8.765	48.697	0.6987	Medium	10.72	10.81	13.364	74.242	0.6941	Medium	10.71	10.81	13.411	74.508	0.7158	Medium	10.72	10.81	13.467	74.816	0.69	Medium	10.72	10.81	15.6	86.665	0.7313	Medium	10.72
IPI-549	767	782	LKQKLENLQNSQLPES	7.51	3	13	7.62	7.93	4.665	35.884	0.8063	Medium	7.63	7.93	4.917	37.826	0.8007	Medium	7.84	7.91	4.749	36.534	0.8519	Medium	7.62	7.93	7.879	60.61	0.8115	Medium	7.63	7.93	8.046	61.894	0.8061	Medium	7.62	7.93	7.773	59.796	0.8132	Medium	7.62	7.93	9.996	76.895	0.8037	Medium	7.63
IPI-549	768	782	KQKLENLQNSQLPES	7.11	2	12	7.21	7.61	4.46	37.167	0.9458	High	7.21	7.61	4.694	39.117	0.9484	High	7.22	7.61	4.601	38.34	0.9409	High	7.21	7.61	7.212	60.098	0.9503	High	7.21	7.61	7.225	60.207	0.9515	High	7.21	7.61	7.138	59.483	0.947	High	7.22	7.61	9.247	77.056	0.9391	High	7.21
IPI-549	783	796	FRVPYDPGLKAGAL	10.17	3	10	10.49	10.6	0.263	2.629	0.8796	High	10.49	10.6	0.304	3.041	0.8923	High	10.49	10.6	0.473	4.726	0.8909	High	10.49	10.6	0.414	4.142	0.8969	High	10.49	10.6	0.484	4.839	0.8945	High	10.49	10.6	0.557	5.572	0.8974	High	10.49	10.6	1.555	15.549	0.9054	High	10.49
IPI-549	789	796	PGLKAGAL	10.19	1	6	10.46	10.55	0.217	3.614	0.8618	Medium	10.45	10.55	0.247	4.116	0.8723	Medium	10.46	10.55	0.351	5.844	0.8206	Medium	10.45	10.55	0.3	4.999	0.8445	Medium	10.45	10.55	0.373	6.22	0.8348	Medium	10.46	10.55	0.428	7.133	0.8474	Medium	10.46	10.55	1.055	17.589	0.8609	Medium	10.46
IPI-549	797	801	AIEKC	4.67	1	3	4.64	4.78	0.976	32.526	0.8265	Medium	4.64	4.78	1.006	33.52	0.842	Medium	4.64	4.78	1.024	34.14	0.8487	Medium	4.64	4.78	1.062	35.416	0.7925	Medium	4.64	4.78	1.104	36.786	0.8168	Medium	4.64	4.78	1.084	36.126	0.8112	Medium	4.64	4.78	1.696	56.542	0.8326	Medium	4.64
IPI-549	797	812	AIEKCKVMASKKKPLW	7	4	13	7.19	7.36	2.447	18.826	0.9253	Medium	7.19	7.36	2.558	19.679	0.9246	Medium	7.19	7.36	2.545	19.576	0.9193	Medium	7.19	7.36	3.049	23.452	0.9206	Medium	7.19	7.36	3.042	23.402	0.9222	Medium	7.19	7.36	2.976	22.895	0.9225	Medium	7.2	7.36	4.3	33.078	0.9208	Medium	7.19
IPI-549	797	815	AIEKCKVMASKKKPLWLEF	10.45	4	16	10.6	10.9	1.813	11.332	0.9215	High	10.6	10.9	1.803	11.268	0.9215	High	10.6	10.9	1.866	11.664	0.9035	High	10.6	10.9	2.311	14.444	0.9181	High	10.6	10.9	2.324	14.522	0.9105	High	10.6	10.9	2.29	14.312	0.9181	High	10.6	10.9	3.221	20.129	0.9131	High	10.6
IPI-549	814	823	EFKCADPTAL	9.84	2	7	9.92	10.1	0.174	2.488	0.7522	Medium	9.92	10.09	0.258	3.688	0.7276	Medium	9.92	10.09	0.359	5.136	0.5752	Medium	9.92	10.09	0.292	4.168	0.7223	Medium	9.92	10.09	0.274	3.92	0.68	Medium	9.92	10.1	0.258	3.691	0.7226	Medium	9.92	10.09	0.417	5.95	0.6721	Medium	9.92
IPI-549	816	823	KCADPTAL	7.06	1	5	7.25	7.36	1.178	23.566	0.8133	Medium	7.25	7.36	1.234	24.674	0.8163	Medium	7.25	7.36	1.269	25.38	0.7581	Medium	7.25	7.36	2.649	52.988	0.7695	Medium	7.25	7.36	2.634	52.674	0.7714	Medium	7.25	7.36	2.647	52.942	0.7844	Medium	7.35	7.42	3.738	74.768	0.6749	Medium	7.29
IPI-549	816	829	KCADPTALSNETIG	8.17	2	11	8.39	8.62	3.936	35.781	0.9117	Medium	8.39	8.62	4.13	37.548	0.9063	Medium	8.39	8.63	4.111	37.373	0.8768	Medium	8.39	8.62	5.873	53.393	0.9014	Medium	8.39	8.62	5.92	53.82	0.8928	Medium	8.4	8.62	5.85	53.18	0.8928	Medium	8.39	8.62	7.131	64.831	0.832	Medium	8.39
IPI-549	816	838	KCADPTALSNETIGIIFKHGDDL	12.26	3	20	12.61	12.68	1.906	9.532	0.7865	Medium	12.6	12.68	2.037	10.187	0.7902	Medium	12.6	12.68	2.421	12.105	0.7507	Medium	12.61	12.68	2.69	13.452	0.7614	Medium	12.6	12.68	3.045	15.225	0.7582	Medium	12.61	12.68	2.76	13.801	0.7597	Medium	12.61	12.68	3.472	17.362	0.7331	Medium	12.6
IPI-549	816	842	KCADPTALSNETIGIIFKHGDDLRQDM	12.04	3	24	12.26	12.39	3.926	16.36	0.8524	Medium	12.26	12.38	4.098	17.077	0.8551	Medium	12.26	12.38	4.287	17.864	0.8179	Medium	12.26	12.39	6.382	26.59	0.8211	Medium	12.26	12.39	6.711	27.961	0.8257	Medium	12.26	12.39	6.678	27.825	0.8325	Medium	12.26	12.39	9.194	38.31	0.8165	Medium	12.26
IPI-549	816	843	KCADPTALSNETIGIIFKHGDDLRQDML	12.57	4	25	12.73	12.84	3.829	15.317	0.8339	Medium	12.73	12.84	4.086	16.343	0.8288	Medium	12.73	12.85	4.151	16.605	0.7829	Medium	12.73	12.85	6.281	25.125	0.7583	Medium	12.79	12.86	6.518	26.073	0.7746	Medium	12.73	12.85	6.644	26.574	0.776	Medium	12.73	12.85	9.188	36.752	0.7562	Medium	12.73
IPI-549	816	845	KCADPTALSNETIGIIFKHGDDLRQDMLIL	13.76	4	27	13.79	13.92	3.642	13.489	0.7033	Medium	13.79	13.92	3.959	14.661	0.7106	Medium	13.79	13.92	4.212	15.6	0.7361	Medium	13.75	13.82	6.543	24.233	0.6674	Medium	13.79	13.92	6.604	24.459	0.6801	Medium	13.8	13.93	6.212	23.007	0.6656	Medium	13.8	13.93	8.674	32.126	0.7245	Medium	13.82
IPI-549	824	829	SNETIG	5.53	1	4	5.88	5.99	1.248	31.204	0.7939	Medium	5.93	6.01	1.332	33.308	0.7874	Medium	5.87	5.98	1.261	31.52	0.7754	Medium	5.88	5.99	1.825	45.631	0.7988	Medium	5.87	5.98	1.773	44.313	0.7854	Medium	5.94	6	1.696	42.395	0.763	Medium	5.88	5.99	2.012	50.31	0.752	Medium	5.87
IPI-549	843	848	LILQIL	14.29	1	4	14.22	14.29	0.163	4.066	0.7968	Medium	14.22	14.29	0.161	4.017	0.7721	Medium	14.22	14.29	0.184	4.592	0.703	Medium	14.22	14.29	0.166	4.139	0.7726	Medium	14.22	14.29	0.134	3.345	0.757	Medium	14.23	14.29	0.132	3.302	0.7722	Medium	14.22	14.29	0.147	3.671	0.7542	Medium	14.22
IPI-549	844	852	ILQILRIME	13.25	2	7	13.49	13.57	0.01	0.138	0.911	Medium	13.49	13.57	0.017	0.239	0.9113	Medium	13.49	13.57	0.025	0.356	0.827	Medium	13.5	13.57	0.004	0.059	0.9115	Medium	13.49	13.57	0.041	0.592	0.902	Medium	13.5	13.57	0.025	0.357	0.9003	Medium	13.5	13.57	0.029	0.41	0.8824	Medium	13.49
IPI-549	849	861	RIMESIWETESLD	11.9	2	11	12.09	12.16	0.43	3.908	0.7738	Medium	12.08	12.16	0.456	4.148	0.7304	Medium	12.08	12.16	0.439	3.995	0.5803	Medium	12.09	12.16	0.851	7.737	0.7824	Medium	12.08	12.16	0.914	8.313	0.7177	Medium	12.09	12.16	0.865	7.862	0.7187	Medium	12.09	12.16	1.763	16.024	0.739	Medium	12.08
IPI-549	849	862	RIMESIWETESLDL	13.25	2	12	13.57	13.71	0.452	3.763	0.8701	Medium	13.58	13.71	0.507	4.228	0.8596	Medium	13.58	13.71	0.512	4.266	0.8677	Medium	13.58	13.72	0.905	7.538	0.8503	Medium	13.58	13.71	0.834	6.95	0.867	Medium	13.58	13.72	0.856	7.135	0.8533	Medium	13.58	13.72	1.715	14.292	0.8553	Medium	13.58
IPI-549	853	861	SIWETESLD	11.57	1	7	11.78	11.94	0.463	6.621	0.8515	Medium	11.78	11.94	0.488	6.969	0.8491	Medium	11.78	11.94	0.518	7.401	0.8223	Medium	11.78	11.94	0.819	11.705	0.8626	Medium	11.78	11.94	0.821	11.723	0.847	Medium	11.79	11.94	0.828	11.835	0.8537	Medium	11.78	11.85	1.742	24.88	0.8193	Medium	11.78
IPI-549	853	862	SIWETESLDL	13.36	1	8	13.6	13.71	0.384	4.804	0.8853	Medium	13.6	13.71	0.429	5.359	0.8729	Medium	13.6	13.71	0.492	6.148	0.795	Medium	13.61	13.72	0.725	9.064	0.8832	Medium	13.6	13.71	0.777	9.717	0.8525	Medium	13.61	13.72	0.807	10.082	0.8549	Medium	13.61	13.72	1.58	19.751	0.851	Medium	13.6
IPI-549	862	878	LCLLPYGCISTGDKIGM	13.08	2	14	13.31	13.4	0.359	2.565	0.9287	Medium	13.31	13.4	0.439	3.132	0.9171	Medium	13.31	13.4	0.568	4.059	0.9011	Medium	13.31	13.4	0.619	4.424	0.9285	Medium	13.31	13.4	0.716	5.114	0.9135	Medium	13.31	13.41	0.755	5.392	0.9248	Medium	13.31	13.4	1.648	11.772	0.9188	Medium	13.31
IPI-549	862	880	LCLLPYGCISTGDKIGMIE	13.7	3	16	13.68	13.7	0.346	2.165	0.7024	Medium	13.68	13.7	0.495	3.093	0.7071	Medium	13.69	13.7	0.402	2.514	0.6695	Medium	13.69	13.71	0.648	4.049	0.7198	Medium	13.69	13.7	0.817	5.106	0.7172	Medium	13.69	13.71	0.741	4.633	0.7028	Medium	13.69	13.71	1.772	11.073	0.7037	Medium	13.69
IPI-549	863	878	CLLPYGCISTGDKIGM	12.04	2	13	12.33	12.49	0.435	3.346	0.9241	Medium	12.32	12.48	0.478	3.679	0.9157	Medium	12.33	12.49	0.583	4.483	0.9237	Medium	12.33	12.49	0.656	5.05	0.9174	Medium	12.33	12.49	0.783	6.022	0.916	Medium	12.33	12.49	0.782	6.017	0.9149	Medium	12.33	12.49	1.662	12.787	0.9242	Medium	12.33
IPI-549	863	880	CLLPYGCISTGDKIGMIE	12.46	2	15	12.82	12.94	0.303	2.021	0.8832	Medium	12.82	12.94	0.382	2.547	0.8866	Medium	12.82	12.94	0.515	3.434	0.8977	Medium	12.82	12.94	0.611	4.074	0.8899	Medium	12.82	12.94	0.63	4.198	0.8863	Medium	12.83	12.94	0.697	4.647	0.8872	Medium	12.82	12.94	1.552	10.345	0.8835	Medium	12.82
IPI-549	865	878	LPYGCISTGDKIGM	10.57	2	12	10.73	10.78	0.463	3.855	0.7467	Medium	10.72	10.78	0.632	5.264	0.7363	Medium	10.78	10.85	0.709	5.91	0.7545	Medium	10.72	10.78	0.719	5.991	0.7471	Medium	10.72	10.78	0.856	7.13	0.7356	Medium	10.73	10.79	0.918	7.651	0.7452	Medium	10.72	10.78	1.703	14.194	0.7375	Medium	10.72
IPI-549	870	878	ISTGDKIGM	7.8	2	7	7.94	7.96	0.707	10.094	0.8229	Medium	7.94	7.96	0.812	11.604	0.7982	Medium	7.94	7.96	0.838	11.972	0.7093	Medium	7.93	7.96	0.724	10.349	0.817	Medium	7.94	7.96	0.807	11.532	0.7914	Medium	7.93	7.96	0.79	11.283	0.7821	Medium	7.94	7.96	1.265	18.075	0.7819	Medium	7.94
IPI-549	879	887	IEIVKDATT	7.16	1	7	7.46	7.52	1.128	16.119	0.8683	Medium	7.37	7.55	1.234	17.627	0.9188	Medium	7.54	7.6	1.269	18.135	0.8772	Medium	7.36	7.55	1.955	27.935	0.9282	Medium	7.37	7.55	2.037	29.094	0.9207	Medium	7.36	7.55	2.003	28.614	0.9224	Medium	7.36	7.55	2.949	42.131	0.91	Medium	7.37
IPI-549	879	889	IEIVKDATTIA	9.23	1	9	9.37	9.46	1.185	13.165	0.9085	Medium	9.44	9.51	1.246	13.848	0.894	Medium	9.47	9.53	1.377	15.295	0.8939	Medium	9.37	9.46	2.167	24.081	0.8864	Medium	9.37	9.46	2.316	25.738	0.8769	Medium	9.38	9.47	2.207	24.522	0.8903	Medium	9.37	9.46	3.252	36.131	0.873	Medium	9.37
IPI-549	879	901	IEIVKDATTIAKIQQSTVGNTGA	10.2	3	21	10.22	10.43	6.765	32.216	0.785	Medium	10.22	10.43	6.925	32.977	0.8021	Medium	10.22	10.43	7.007	33.369	0.7894	Medium	10.22	10.43	7.653	36.441	0.7643	Medium	10.22	10.43	8.019	38.186	0.7838	Medium	10.22	10.43	7.805	37.165	0.7707	Medium	10.22	10.43	9.092	43.297	0.7545	Medium	10.22
IPI-549	879	910	IEIVKDATTIAKIQQSTVGNTGAFKDEVLNHW	12.06	4	30	11.88	12.25	8.522	28.408	0.8197	Medium	11.87	12.25	8.906	29.685	0.8024	Medium	11.87	12.25	8.583	28.611	0.7423	Medium	11.88	12.25	10.584	35.28	0.7944	Medium	11.87	12.25	10.943	36.478	0.783	Medium	11.88	12.26	10.504	35.013	0.7706	Medium	12.02	12.09	12.776	42.587	0.7774	Medium	11.87
IPI-549	881	887	IVKDATT	4.14	1	5	4.09	4.27	1.065	21.296	0.9241	Medium	4.08	4.27	1.077	21.542	0.9268	Medium	4.08	4.27	1.159	23.177	0.9342	Medium	4.09	4.27	1.691	33.83	0.9242	Medium	4.08	4.27	1.723	34.462	0.9308	Medium	4.08	4.27	1.752	35.043	0.9055	Medium	4.09	4.27	2.27	45.396	0.9111	Medium	4.08
IPI-549	888	901	IAKIQQSTVGNTGA	6.15	2	12	6.42	6.52	6.269	52.24	0.9188	High	6.43	6.52	6.491	54.09	0.9247	High	6.43	6.52	6.53	54.416	0.9306	Medium	6.43	6.52	6.698	55.82	0.8904	Medium	6.43	6.52	6.727	56.058	0.9272	High	6.42	6.52	6.79	56.581	0.9181	Medium	6.43	6.52	7.43	61.918	0.9274	Medium	6.43
IPI-549	902	910	FKDEVLNHW	10.1	3	7	10.44	10.52	0.18	2.571	0.8363	Medium	10.44	10.52	0.216	3.081	0.8546	Medium	10.44	10.52	0.231	3.298	0.9049	High	10.44	10.52	0.341	4.878	0.8332	Medium	10.44	10.52	0.394	5.635	0.8597	Medium	10.44	10.53	0.394	5.624	0.8497	Medium	10.44	10.52	0.913	13.042	0.8638	Medium	10.44
IPI-549	902	924	FKDEVLNHWLKEKSPTEEKFQAA	9.54	3	20	9.72	9.86	1.575	7.873	0.6187	Medium	9.71	9.86	1.538	7.692	0.6243	Medium	9.72	9.86	1.745	8.726	0.6589	Medium	9.72	9.86	2.303	11.514	0.6046	Medium	9.72	9.86	2.255	11.274	0.6278	Medium	9.72	9.86	2.212	11.058	0.6061	Medium	9.72	9.86	3.637	18.184	0.6094	Medium	9.72
IPI-549	927	934	RFVYSCAG	8.5	2	6	8.7	8.79	0.136	2.273	0.8394	Medium	8.7	8.79	0.119	1.991	0.864	Medium	8.7	8.79	0.205	3.412	0.8836	Medium	8.7	8.79	0.148	2.47	0.8533	Medium	8.7	8.79	0.187	3.112	0.8909	Medium	8.7	8.8	0.148	2.46	0.8561	Medium	8.7	8.79	0.154	2.561	0.855	Medium	8.7
IPI-549	929	934	VYSCAG	6.2	1	4	6.36	6.5	0.085	2.128	0.9084	Medium	6.36	6.5	0.129	3.233	0.8979	Medium	6.36	6.5	0.159	3.973	0.8449	Medium	6.36	6.5	0.072	1.788	0.9078	Medium	6.36	6.5	0.104	2.602	0.9052	Medium	6.36	6.5	0.13	3.249	0.8939	Medium	6.36	6.51	0.122	3.06	0.8893	Medium	6.36
IPI-549	935	939	YCVAT	6.89	1	3	7.15	7.33	0.029	0.977	0.912	Medium	7.16	7.33	0.022	0.725	0.904	Medium	7.16	7.33	0.05	1.668	0.901	Medium	7.15	7.33	0.028	0.919	0.9086	Medium	7.16	7.33	0.026	0.863	0.9082	Medium	7.15	7.33	0.051	1.697	0.9042	Medium	7.16	7.33	0.038	1.281	0.9137	Medium	7.16
IPI-549	940	953	FVLGIGDRHNDNIM	10.61	3	12	10.95	11.04	0.17	1.414	0.9194	Medium	10.95	11.04	0.209	1.738	0.9148	Medium	10.95	11.04	0.266	2.217	0.9105	Medium	10.95	11.04	0.25	2.082	0.9246	Medium	10.95	11.04	0.276	2.302	0.92	Medium	10.95	11.05	0.273	2.275	0.919	Medium	10.95	11.04	0.732	6.099	0.9155	Medium	10.95
IPI-549	954	960	ITETGNL	7.64	1	5	7.89	7.94	0.271	5.414	0.9024	Medium	7.93	8	0.327	6.544	0.8976	Medium	7.97	8.04	0.418	8.362	0.903	Medium	7.88	7.94	0.742	14.843	0.8875	Medium	7.89	7.94	0.818	16.364	0.8825	Medium	7.88	7.94	0.802	16.037	0.8865	Medium	7.88	7.94	1.313	26.266	0.8716	Medium	7.89
IPI-549	954	961	ITETGNLF	11.35	1	6	11.59	11.71	0.236	3.93	0.8674	Medium	11.66	11.73	0.33	5.506	0.8858	Medium	11.59	11.71	0.398	6.641	0.8535	Medium	11.59	11.71	0.606	10.107	0.8692	Medium	11.59	11.7	0.681	11.349	0.8557	Medium	11.59	11.71	0.677	11.275	0.8533	Medium	11.59	11.71	1.07	17.834	0.8596	Medium	11.59
IPI-549	954	975	ITETGNLFHIDFGHILGNYKSF	13.27	2	20	13.53	13.63	5.381	26.906	0.7608	Medium	13.53	13.63	5.592	27.96	0.7587	Medium	13.53	13.64	5.163	25.813	0.6806	Medium	13.54	13.64	5.791	28.953	0.7337	Medium	13.53	13.64	5.932	29.662	0.7596	Medium	13.54	13.64	6.026	30.13	0.7316	Medium	13.54	13.64	6.497	32.486	0.6894	Medium	13.54
IPI-549	954	976	ITETGNLFHIDFGHILGNYKSFL	13.82	4	21	13.98	14.24	6.388	30.417	0.7413	Medium	13.98	14.24	6.588	31.37	0.7461	Medium	13.98	14.24	6.413	30.538	0.724	Medium	13.98	14.24	6.843	32.584	0.7204	Medium	13.98	14.24	6.793	32.348	0.7363	Medium	13.98	14.24	7.013	33.397	0.7501	Medium	13.98	14.24	7.298	34.752	0.7095	Medium	13.98
IPI-549	954	992	ITETGNLFHIDFGHILGNYKSFLGINKERVPFVLTPDFL	13.99	5	35	14.12	14.19	9.295	26.556	0.7409	Medium	14.17	14.31	9.223	26.352	0.7354	Medium	14.17	14.31	9.483	27.095	0.74	Medium	14.09	14.15	10.15	28.999	0.706	Medium	14.17	14.31	9.873	28.209	0.7176	Medium	14.18	14.32	10.186	29.104	0.7426	Medium	14.17	14.31	10.953	31.293	0.746	Medium	14.17
IPI-549	961	971	FHIDFGHILGN	12.47	3	9	12.31	12.42	2.802	31.129	0.8567	Medium	12.31	12.42	2.96	32.894	0.8452	Medium	12.45	12.52	2.843	31.587	0.8945	Medium	12.31	12.42	3.312	36.803	0.8523	Medium	12.31	12.42	3.493	38.814	0.837	Medium	12.31	12.42	3.449	38.325	0.8388	Medium	12.31	12.42	3.79	42.113	0.8442	Medium	12.31
IPI-549	961	972	FHIDFGHILGNY	12.72	3	10	13.02	13.11	3.349	33.486	0.9466	High	13.02	13.11	3.498	34.98	0.9481	High	13.02	13.12	3.522	35.216	0.9458	High	13.03	13.12	3.807	38.069	0.9387	High	13.02	13.12	3.905	39.045	0.9539	High	13.03	13.12	3.904	39.042	0.9336	High	13.03	13.12	4.198	41.979	0.9516	High	13.02
IPI-549	961	975	FHIDFGHILGNYKSF	12.57	2	13	12.68	12.78	5.124	39.416	0.7956	Medium	12.79	12.86	5.291	40.7	0.7474	Medium	12.8	12.87	5.196	39.968	0.8003	Medium	12.68	12.79	5.874	45.185	0.7776	Medium	12.68	12.79	5.801	44.626	0.7691	Medium	12.68	12.79	5.846	44.973	0.7584	Medium	12.68	12.79	6.044	46.492	0.7522	Medium	12.68
IPI-549	961	991	FHIDFGHILGNYKSFLGINKERVPFVLTPDF	13.67	5	27	13.86	13.97	9.45	35.002	0.6424	Medium	13.94	14	9.904	36.68	0.6252	Medium	13.86	13.97	9.766	36.169	0.6112	Medium	13.87	13.98	10.282	38.083	0.6462	Medium	13.86	13.97	10.521	38.968	0.6307	Medium	13.87	13.98	10.867	40.247	0.6455	Medium	13.87	13.98	11.573	42.862	0.624	Medium	13.86
IPI-549	961	992	FHIDFGHILGNYKSFLGINKERVPFVLTPDFL	13.92	4	28	13.97	14.24	9.401	33.573	0.6835	Medium	13.97	14.24	9.319	33.282	0.6965	Medium	13.97	14.24	9.245	33.018	0.67	Medium	13.98	14.24	9.888	35.314	0.6728	Medium	13.97	14.24	10.025	35.803	0.6766	Medium	13.98	14.24	10.101	36.075	0.677	Medium	13.98	14.24	10.933	39.047	0.6496	Medium	13.97
IPI-549	962	992	HIDFGHILGNYKSFLGINKERVPFVLTPDFL	13.65	5	27	13.78	13.87	9.354	34.646	0.7818	Medium	13.79	13.87	9.536	35.317	0.8276	Medium	13.79	13.87	9.643	35.713	0.7719	Medium	13.79	13.88	9.924	36.756	0.7914	Medium	13.79	13.87	10.179	37.7	0.7799	Medium	13.79	13.87	10.176	37.689	0.8015	Medium	13.79	13.87	10.961	40.597	0.7874	Medium	13.79
IPI-549	973	992	KSFLGINKERVPFVLTPDFL	12.87	4	16	13.1	13.24	4.005	25.03	0.9026	Medium	13.1	13.24	4.074	25.462	0.9024	Medium	13.1	13.24	4.063	25.395	0.922	Medium	13.1	13.25	4.328	27.048	0.916	Medium	13.1	13.24	4.449	27.808	0.9171	Medium	13.1	13.25	4.464	27.901	0.9111	Medium	13.1	13.24	4.925	30.78	0.911	Medium	13.1
IPI-549	976	992	LGINKERVPFVLTPDFL	13.24	3	13	13.37	13.67	2.376	18.274	0.9328	High	13.37	13.67	2.45	18.847	0.9357	High	13.38	13.67	2.471	19.008	0.9129	High	13.38	13.67	2.753	21.174	0.9333	High	13.38	13.67	2.817	21.67	0.9315	High	13.38	13.67	2.831	21.779	0.9313	High	13.38	13.67	3.309	25.45	0.9381	High	13.38
IPI-549	977	991	GINKERVPFVLTPDF	12.2	3	11	12.23	12.35	1.919	17.444	0.8051	Medium	12.22	12.34	1.943	17.666	0.8031	Medium	12.23	12.34	2.002	18.201	0.8297	Medium	12.23	12.35	2.282	20.741	0.8136	Medium	12.23	12.34	2.336	21.237	0.8224	Medium	12.23	12.35	2.374	21.584	0.7993	Medium	12.23	12.35	2.924	26.582	0.8141	Medium	12.23
IPI-549	977	992	GINKERVPFVLTPDFL	12.98	3	12	13.2	13.31	1.754	14.614	0.9412	Medium	13.2	13.31	1.792	14.932	0.935	Medium	13.2	13.31	1.871	15.594	0.9295	Medium	13.2	13.31	2.132	17.77	0.9357	Medium	13.2	13.31	2.194	18.282	0.9341	Medium	13.2	13.31	2.252	18.766	0.924	Medium	13.2	13.31	2.719	22.656	0.9317	Medium	13.2
IPI-549	980	992	KERVPFVLTPDFL	12.82	3	9	13.11	13.25	0.504	5.599	0.8822	Medium	13.11	13.25	0.564	6.262	0.9006	Medium	13.12	13.25	0.629	6.986	0.9168	Medium	13.12	13.25	0.854	9.49	0.877	Medium	13.12	13.25	0.875	9.718	0.8841	Medium	13.12	13.25	0.945	10.496	0.8768	Medium	13.12	13.25	1.299	14.437	0.8853	Medium	13.12
IPI-549	992	1014	LFVMGTSGKKTSPHFQKFQDICV	10.26	4	20	10.36	10.53	1.108	5.542	0.8521	Medium	10.36	10.53	1.11	5.548	0.8457	Medium	10.36	10.53	1.161	5.805	0.8282	Medium	10.36	10.53	1.343	6.717	0.8532	Medium	10.36	10.53	1.397	6.985	0.8407	Medium	10.37	10.53	1.366	6.832	0.8318	Medium	10.36	10.53	1.713	8.565	0.8263	Medium	10.36
IPI-549	993	1014	FVMGTSGKKTSPHFQKFQDICV	9.54	2	19	9.72	9.92	1.317	6.933	0.8359	Medium	9.71	9.92	1.274	6.704	0.8195	Medium	9.72	9.92	1.378	7.251	0.8013	Medium	9.72	9.92	1.5	7.896	0.8267	Medium	9.72	9.92	1.532	8.062	0.8239	Medium	9.72	9.92	1.608	8.462	0.8203	Medium	9.72	9.92	2.06	10.842	0.808	Medium	9.72
IPI-549	1007	1014	QKFQDICV	9.92	2	6	10.2	10.22	0.234	3.898	0.7685	Medium	10.2	10.22	0.291	4.845	0.7382	Medium	10.2	10.22	0.299	4.98	0.7484	Medium	10.2	10.22	0.202	3.366	0.74	Medium	10.2	10.22	0.214	3.574	0.7747	Medium	10.21	10.22	0.247	4.115	0.7351	Medium	10.2	10.22	0.272	4.541	0.7398	Medium	10.2
IPI-549	1015	1026	KAYLALRHHTNL	6.32	3	10	6.61	6.73	0.247	2.469	0.9027	Medium	6.61	6.73	0.307	3.074	0.9149	Medium	6.61	6.73	0.305	3.047	0.8793	Medium	6.62	6.73	0.328	3.284	0.9143	Medium	6.61	6.73	0.296	2.956	0.9135	Medium	6.61	6.73	0.298	2.983	0.8996	Medium	6.62	6.73	0.622	6.224	0.9038	Medium	6.61
IPI-549	1015	1027	KAYLALRHHTNLL	7.7	2	11	7.99	8.14	0.252	2.293	0.7923	Medium	7.99	8.14	0.261	2.376	0.7829	Medium	8	8.14	0.309	2.814	0.7879	Medium	7.99	8.14	0.37	3.366	0.7886	Medium	8	8.14	0.341	3.104	0.7792	Medium	7.99	8.14	0.271	2.467	0.7742	Medium	7.99	8.14	0.539	4.903	0.7905	Medium	8
IPI-549	1017	1027	YLALRHHTNLL	8.29	2	9	8.52	8.65	0.166	1.842	0.8114	Medium	8.52	8.65	0.189	2.098	0.7649	Medium	8.53	8.65	0.173	1.919	0.6668	Medium	8.52	8.65	0.244	2.708	0.7836	Medium	8.52	8.65	0.242	2.694	0.7317	Medium	8.53	8.65	0.22	2.444	0.7371	Medium	8.52	8.65	0.501	5.565	0.7205	Medium	8.52
IPI-549	1019	1026	ALRHHTNL	4.23	2	6	4.33	4.55	0.336	5.6	0.9137	Medium	4.33	4.55	0.328	5.46	0.9065	Medium	4.33	4.55	0.403	6.715	0.8674	Medium	4.33	4.55	0.381	6.353	0.911	Medium	4.33	4.55	0.387	6.455	0.8976	Medium	4.33	4.54	0.329	5.48	0.8922	Medium	4.33	4.55	0.618	10.301	0.8499	Medium	4.33
IPI-549	1019	1027	ALRHHTNLL	6.22	2	7	6.52	6.78	0.183	2.613	0.8313	Medium	6.53	6.78	0.266	3.797	0.8349	Medium	6.53	6.78	0.292	4.176	0.8459	Medium	6.53	6.78	0.269	3.846	0.8492	Medium	6.53	6.78	0.24	3.424	0.8461	Medium	6.52	6.78	0.243	3.469	0.8028	Medium	6.53	6.78	0.586	8.365	0.8277	Medium	6.53
IPI-549	1027	1031	LIILF	14.81	1	3	14.73	14.86	0.01	0.347	0.9058	Medium	14.73	14.86	0.036	1.216	0.8975	Medium	14.73	14.86	0.036	1.203	0.9098	Medium	14.73	14.86	0.023	0.765	0.9131	Medium	14.73	14.86	0.008	0.282	0.9014	Medium	14.74	14.86	0.033	1.098	0.8996	Medium	14.73	14.86	0.043	1.418	0.907	Medium	14.74
IPI-549	1031	1035	FSMML	13.4	1	3	13.82	13.89	0.035	1.154	0.8997	Medium	13.82	13.89	0.042	1.392	0.9055	Medium	13.82	13.9	0.053	1.767	0.8987	Medium	13.82	13.9	0.042	1.408	0.892	Medium	13.82	13.9	0.051	1.696	0.9019	Medium	13.82	13.9	0.054	1.795	0.8973	Medium	13.82	13.9	0.07	2.327	0.9043	Medium	13.82
IPI-549	1035	1042	LMTGMPQL	11.88	1	5	12.12	12.16	1.839	36.771	0.8577	Medium	12.11	12.16	1.896	37.92	0.8671	Medium	12.12	12.16	1.884	37.681	0.8806	Medium	12.12	12.16	2.637	52.732	0.8661	Medium	12.12	12.16	2.704	54.076	0.8626	Medium	12.12	12.16	2.631	52.611	0.8481	Medium	12.12	12.16	3.577	71.532	0.8593	Medium	12.12
IPI-549	1035	1050	LMTGMPQLTSKEDIEY	10.99	2	13	11.12	11.39	4.359	33.533	0.809	Medium	11.12	11.38	4.573	35.176	0.8071	Medium	11.12	11.39	4.573	35.177	0.7858	Medium	11.12	11.39	5.772	44.397	0.7942	Medium	11.12	11.39	5.817	44.748	0.7945	Medium	11.12	11.39	5.758	44.289	0.782	Medium	11.12	11.39	7.912	60.864	0.7662	Medium	11.12
IPI-549	1036	1042	MTGMPQL	11.2	1	4	11.31	11.41	1.872	46.811	0.7381	Medium	11.31	11.4	1.913	47.816	0.7568	Medium	11.31	11.4	1.855	46.381	0.7879	Medium	11.31	11.4	2.609	65.23	0.7717	Medium	11.31	11.4	2.675	66.876	0.7709	Medium	11.32	11.41	2.601	65.022	0.7482	Medium	11.31	11.4	3.102	77.541	0.778	Medium	11.35
IPI-549	1036	1049	MTGMPQLTSKEDIE	9.49	2	11	9.77	9.9	4.203	38.212	0.7755	Medium	9.76	9.9	4.249	38.632	0.7925	Medium	9.77	9.9	4.363	39.661	0.761	Medium	9.77	9.9	5.249	47.718	0.7855	Medium	9.77	9.9	5.38	48.91	0.7879	Medium	9.77	9.91	5.293	48.114	0.7622	Medium	9.77	9.9	6.922	62.925	0.7572	Medium	9.77
IPI-549	1050	1071	YIRDALTVGKNEEDAKKYFLDQ	9.85	4	20	9.95	10.29	2.55	12.748	0.8292	Medium	9.95	10.29	2.537	12.683	0.8259	Medium	9.95	10.29	2.725	13.625	0.8225	Medium	9.95	10.29	2.59	12.952	0.8321	Medium	9.95	10.29	2.716	13.58	0.8349	Medium	9.96	10.29	2.703	13.516	0.8219	Medium	9.95	10.29	3.062	15.311	0.8283	Medium	9.95
IPI-549	1051	1069	IRDALTVGKNEEDAKKYFL	9.61	5	17	9.8	9.89	2.199	12.938	0.8081	Medium	9.8	9.88	2.076	12.21	0.8092	Medium	9.8	9.88	2.392	14.069	0.797	Medium	9.8	9.88	2.364	13.905	0.8258	Medium	9.8	9.88	2.322	13.657	0.8291	Medium	9.81	9.89	2.18	12.822	0.7983	Medium	9.8	9.88	2.585	15.205	0.8051	Medium	9.8
IPI-549	1051	1071	IRDALTVGKNEEDAKKYFLDQ	9.48	3	19	9.66	9.76	2.465	12.974	0.8293	Medium	9.66	9.76	2.559	13.47	0.8524	Medium	9.66	9.76	2.771	14.586	0.8594	Medium	9.66	9.76	2.664	14.019	0.8505	Medium	9.66	9.76	2.676	14.082	0.8669	Medium	9.66	9.76	2.702	14.221	0.8435	Medium	9.66	9.76	3.041	16.004	0.848	Medium	9.66
IPI-549	1051	1073	IRDALTVGKNEEDAKKYFLDQIE	10.45	4	21	10.69	10.78	2.294	10.924	0.7989	Medium	10.69	10.77	2.341	11.145	0.8049	Medium	10.69	10.77	2.564	12.208	0.7878	Medium	10.69	10.77	2.496	11.886	0.8111	Medium	10.69	10.77	2.59	12.335	0.8071	Medium	10.69	10.78	2.551	12.146	0.7839	Medium	10.69	10.77	2.959	14.092	0.8029	Medium	10.69
IPI-549	1072	1084	IEVCRDKGWTVQF	11.18	3	11	11.38	11.61	1.27	11.548	0.9188	Medium	11.38	11.6	1.323	12.026	0.9111	Medium	11.38	11.6	1.347	12.243	0.914	Medium	11.38	11.61	3.022	27.476	0.9198	Medium	11.38	11.6	3.1	28.184	0.9149	Medium	11.38	11.61	3.031	27.558	0.9176	Medium	11.38	11.61	5.236	47.603	0.9161	Medium	11.38
IPI-549	1074	1084	VCRDKGWTVQF	10.65	2	9	10.95	11.02	1.179	13.103	0.7403	Medium	10.95	11.02	1.261	14.014	0.7246	Medium	10.95	11.02	1.247	13.853	0.6441	Medium	10.95	11.02	2.918	32.421	0.7359	Medium	10.95	11.02	3	33.328	0.7	Medium	10.95	11.02	2.899	32.207	0.707	Medium	10.95	11.02	5.096	56.627	0.6943	Medium	10.95
IPI-549	1085	1092	NWFLHLVL	14.19	2	6	14.39	14.65	1.676	27.932	0.9315	High	14.39	14.65	1.777	29.61	0.9214	High	14.39	14.65	1.687	28.112	0.9409	High	14.39	14.65	3.982	66.37	0.9386	High	14.39	14.65	4.022	67.041	0.9167	High	14.39	14.65	3.983	66.388	0.9358	High	14.39	14.65	4.824	80.405	0.9184	Medium	14.39
IPI-549	1089	1102	HLVLGIKQGEKHSA	5.79	4	12	6.07	6.14	5.801	48.341	0.9061	Medium	6.14	6.22	5.972	49.766	0.8925	Medium	6.07	6.18	5.945	49.542	0.8621	Medium	6.08	6.18	6.62	55.165	0.9003	Medium	6.07	6.17	6.603	55.028	0.9076	Medium	6.07	6.17	6.546	54.549	0.892	Medium	6.08	6.18	6.768	56.399	0.885	Medium	6.07
IPI-549	1091	1102	VLGIKQGEKHSA	5.16	3	10	5.38	5.45	5.125	51.254	0.9049	Medium	5.4	5.5	5.289	52.888	0.9209	Medium	5.4	5.5	5.365	53.652	0.901	Medium	5.41	5.51	5.231	52.308	0.9025	Medium	5.4	5.5	5.182	51.821	0.9278	Medium	5.41	5.51	5.176	51.763	0.914	Medium	5.41	5.51	5.246	52.458	0.8985	Medium	5.4
IPI-549	1093	1102	GIKQGEKHSA	3.38	1	8	3.44	3.7	4.088	51.106	0.8919	Medium	3.44	3.7	4.078	50.979	0.8852	Medium	3.44	3.7	4.077	50.962	0.813	Medium	3.44	3.7	4.056	50.705	0.8632	Medium	3.44	3.7	3.938	49.223	0.8854	Medium	3.43	3.69	4.119	51.49	0.8898	Medium	3.44	3.7	3.985	49.81	0.8423	Medium	3.53
Gedatolisib	4	12	ENYKQPVVL	9.05	1	6	9.26	9.33	4.916	81.934	0.7604	Medium	9.3	9.37	4.987	83.118	0.7418	Medium	9.29	9.37	4.993	83.219	0.7467	Medium	9.29	9.37	5.139	85.647	0.7803	Medium	9.3	9.37	5.099	84.984	0.7559	Medium	9.3	9.37	5.132	85.539	0.7277	Medium	9.29	9.37	5.093	84.881	0.7605	Medium	9.25
Gedatolisib	6	12	YKQPVVL	8.77	1	4	9.02	9.16	3.693	92.33	0.9188	Medium	9.02	9.16	3.691	92.281	0.905	Medium	9.02	9.16	3.709	92.731	0.913	Medium	9.02	9.17	3.752	93.811	0.9182	Medium	9.02	9.16	3.717	92.92	0.9006	Medium	9.02	9.16	3.748	93.698	0.9158	Medium	9.02	9.16	3.727	93.171	0.9219	Medium	9.02
Gedatolisib	13	32	REDNCRRRRRMKPRSAAASL	3.92	5	17	4.1	4.42	7.901	46.476	0.9452	High	4.1	4.42	7.502	44.128	0.9459	High	4.1	4.42	7.662	45.07	0.9433	High	4.1	4.42	8.28	48.704	0.9497	High	4.18	4.25	8.119	47.759	0.9044	Medium	4.1	4.42	7.829	46.054	0.9396	High	4.1	4.42	7.955	46.797	0.9436	High	4.1
Gedatolisib	33	37	SSMEL	9.72	1	3	9.74	9.76	2.089	69.649	0.7762	Medium	9.74	9.76	2.113	70.432	0.7118	Medium	9.74	9.76	2.04	68.012	0.6903	Medium	9.74	9.76	2.362	78.718	0.773	Medium	9.72	9.78	2.312	77.073	0.6341	Medium	9.74	9.76	2.349	78.295	0.6521	Medium	9.74	9.76	2.384	79.477	0.7577	Medium	9.74
Gedatolisib	36	41	ELIPIE	10.66	1	3	10.89	11.16	0.117	3.916	0.8197	Medium	10.89	11.16	0.135	4.505	0.8094	Medium	10.89	11.16	0.123	4.11	0.8044	Medium	10.89	11.16	0.166	5.537	0.8176	Medium	10.89	11.16	0.14	4.671	0.8122	Medium	10.89	11.16	0.149	4.958	0.8194	Medium	10.89	11.16	0.318	10.614	0.8321	Medium	10.89
Gedatolisib	42	58	FVLPTSQRKCKSPETAL	8.39	3	13	8.51	8.77	4.384	33.72	0.9112	High	8.51	8.77	4.25	32.694	0.9115	High	8.51	8.77	4.411	33.933	0.9112	High	8.52	8.78	5.36	41.23	0.9092	High	8.52	8.78	5.286	40.665	0.916	High	8.52	8.78	5.299	40.759	0.9031	High	8.51	8.77	6.236	47.965	0.9065	Medium	8.52
Gedatolisib	43	59	VLPTSQRKCKSPETALL	8.07	3	13	8.3	8.46	4.515	34.735	0.7524	Medium	8.3	8.46	4.43	34.076	0.775	Medium	8.3	8.46	4.58	35.229	0.7611	Medium	8.29	8.35	5.661	43.545	0.7518	Medium	8.28	8.36	5.627	43.286	0.748	Medium	8.37	8.45	5.681	43.701	0.7657	Medium	8.3	8.37	6.615	50.888	0.7481	Medium	8.26
Gedatolisib	59	70	LHVAGHGNVEQM	6.68	2	10	6.79	7.06	0.97	9.7	0.8669	Medium	6.96	7.04	0.858	8.577	0.8634	Medium	6.79	7.06	0.821	8.209	0.8628	Medium	6.8	7.07	1.488	14.883	0.8604	Medium	6.8	7.07	1.509	15.093	0.8608	Medium	6.79	7.06	1.594	15.94	0.8631	Medium	6.79	7.06	2.108	21.082	0.8515	Medium	6.8
Gedatolisib	59	72	LHVAGHGNVEQMKA	5.97	2	12	6.09	6.52	0.982	8.185	0.7089	Medium	6.29	6.37	0.903	7.529	0.8342	Medium	6.25	6.32	0.797	6.644	0.842	Medium	6.09	6.52	1.389	11.573	0.7253	Medium	6.09	6.52	1.275	10.628	0.7402	Medium	6.09	6.52	1.438	11.982	0.7303	Medium	6.09	6.52	2.1	17.497	0.6703	Medium	6.09
Gedatolisib	60	70	HVAGHGNVEQM	5.37	1	9	5.46	5.77	0.794	8.827	0.7906	Medium	5.46	5.77	0.648	7.2	0.8159	Medium	5.46	5.77	0.791	8.787	0.8053	Medium	5.46	5.77	1.316	14.624	0.8128	Medium	5.46	5.77	1.308	14.533	0.8073	Medium	5.46	5.77	1.376	15.287	0.783	Medium	5.46	5.77	1.83	20.337	0.7656	Medium	5.46
Gedatolisib	60	75	HVAGHGNVEQMKAQVW	8.28	3	14	8.45	8.69	0.499	3.566	0.818	Medium	8.45	8.69	0.475	3.392	0.8139	Medium	8.45	8.69	0.489	3.492	0.8153	Medium	8.45	8.7	0.796	5.684	0.8056	Medium	8.45	8.69	0.717	5.122	0.8426	Medium	8.45	8.69	0.859	6.136	0.7793	Medium	8.45	8.69	1.124	8.031	0.8064	Medium	8.45
Gedatolisib	60	78	HVAGHGNVEQMKAQVWLRA	8.62	4	17	8.81	8.88	0.531	3.124	0.6998	Medium	8.81	8.88	0.613	3.606	0.6105	Medium	8.81	8.88	0.632	3.716	0.5624	Medium	8.81	8.89	0.742	4.366	0.7032	Medium	8.81	8.89	0.925	5.439	0.6968	Medium	8.97	9.04	0.837	4.925	0.7343	Medium	8.81	8.88	1.549	9.115	0.6855	Medium	8.81
Gedatolisib	71	76	KAQVWL	10.67	1	4	10.97	11.04	0.148	3.71	0.8824	Medium	10.97	11.04	0.142	3.547	0.8942	Medium	10.97	11.04	0.156	3.905	0.8861	Medium	10.97	11.04	0.154	3.855	0.8662	Medium	10.98	11.04	0.163	4.078	0.8686	Medium	10.97	11.04	0.175	4.364	0.8696	Medium	10.97	11.04	0.266	6.662	0.8582	Medium	10.98
Gedatolisib	71	78	KAQVWLRA	8.69	2	6	8.64	8.86	0.243	4.057	0.8597	Medium	8.64	8.86	0.183	3.058	0.839	Medium	8.64	8.86	0.264	4.403	0.8236	Medium	8.65	8.87	0.366	6.093	0.8731	Medium	8.7	8.77	0.27	4.505	0.8938	Medium	8.64	8.86	0.296	4.934	0.8455	Medium	8.64	8.86	0.579	9.648	0.8877	Medium	8.64
Gedatolisib	79	84	LETSVA	6.26	1	4	6.46	6.71	2.124	53.095	0.8549	Medium	6.46	6.71	2.118	52.945	0.8615	Medium	6.57	6.64	2.201	55.026	0.8921	Medium	6.46	6.71	2.911	72.778	0.8586	Medium	6.46	6.71	2.983	74.575	0.8643	Medium	6.64	6.72	2.93	73.248	0.8523	Medium	6.46	6.71	3.212	80.299	0.8729	Medium	6.46
Gedatolisib	79	86	LETSVAAD	6.15	1	6	6.32	6.58	3.255	54.25	0.9028	Medium	6.32	6.58	3.182	53.028	0.9053	Medium	6.32	6.58	3.362	56.029	0.9011	Medium	6.33	6.58	4.443	74.053	0.8985	Medium	6.33	6.58	4.374	72.908	0.8965	Medium	6.32	6.58	4.449	74.145	0.8763	Medium	6.32	6.58	4.869	81.144	0.8753	Medium	6.33
Gedatolisib	87	99	FYHRLGPHHFLLL	10.45	3	10	10.54	10.95	0.366	3.663	0.7772	Medium	10.54	10.95	0.359	3.586	0.8089	Medium	10.54	10.95	0.361	3.614	0.8186	Medium	10.54	10.95	0.708	7.078	0.782	Medium	10.54	10.95	0.675	6.746	0.7893	Medium	10.54	10.95	0.617	6.165	0.8031	Medium	10.54	10.95	0.904	9.044	0.7725	Medium	10.54
Gedatolisib	88	98	YHRLGPHHFLL	8.5	4	8	8.93	9.01	0.311	3.893	0.6383	Medium	8.93	9.01	0.39	4.879	0.6944	Medium	8.93	9.01	0.463	5.784	0.718	Medium	8.9	8.97	0.799	9.983	0.6588	Medium	8.93	9.01	0.815	10.194	0.736	Medium	8.93	9.01	0.793	9.915	0.7054	Medium	8.92	9.01	1.051	13.137	0.6619	Medium	8.93
Gedatolisib	100	106	YQKKGQW	6.04	2	5	6.24	6.45	1.869	37.372	0.8947	High	6.24	6.45	1.797	35.947	0.8824	Medium	6.24	6.45	1.862	37.234	0.8836	Medium	6.24	6.45	2.778	55.564	0.9046	High	6.24	6.45	2.745	54.906	0.8873	Medium	6.24	6.45	2.808	56.153	0.8735	Medium	6.24	6.45	3.121	62.419	0.8895	High	6.24
Gedatolisib	107	113	YEIYDKY	9.1	1	5	9.3	9.53	1.066	21.322	0.836	Medium	9.3	9.53	1.039	20.786	0.853	Medium	9.3	9.53	1.076	21.529	0.8497	Medium	9.3	9.53	1.906	38.128	0.8157	Medium	9.31	9.53	1.952	39.044	0.7985	Medium	9.31	9.53	1.877	37.548	0.8142	Medium	9.3	9.53	2.715	54.304	0.79	Medium	9.31
Gedatolisib	107	118	YEIYDKYQVVQT	9.59	2	10	9.67	9.74	1.161	11.61	0.8586	Medium	9.67	9.74	1.171	11.711	0.8535	Medium	9.67	9.74	1.191	11.914	0.8546	Medium	9.67	9.74	2.126	21.259	0.8618	Medium	9.68	9.74	1.896	18.959	0.8293	Medium	9.67	9.74	1.961	19.613	0.8189	Medium	9.67	9.74	3.471	34.709	0.8128	Medium	9.73
Gedatolisib	107	119	YEIYDKYQVVQTL	10.88	2	11	11.05	11.12	1.134	10.309	0.8364	Medium	11.05	11.12	1.07	9.725	0.7838	Medium	11.05	11.12	1.096	9.966	0.7299	Medium	11.05	11.12	2.001	18.187	0.8064	Medium	11.05	11.13	1.885	17.134	0.7605	Medium	11.05	11.13	1.875	17.048	0.7349	Medium	11.05	11.12	3.433	31.214	0.7617	Medium	11.05
Gedatolisib	114	121	QVVQTLDC	8.83	1	6	9.04	9.24	1.178	19.635	0.8743	Medium	9.04	9.24	1.22	20.328	0.8714	Medium	9.04	9.24	1.252	20.874	0.8505	Medium	9.05	9.24	1.488	24.796	0.8671	Medium	9.05	9.24	1.425	23.744	0.8661	Medium	9.05	9.24	1.451	24.189	0.8372	Medium	9.04	9.24	1.611	26.853	0.8271	Medium	9.05
Gedatolisib	122	137	LRYWKATHRSPGQIHL	7.53	4	13	7.78	8.1	0.956	7.351	0.8892	Medium	7.78	8.1	0.831	6.395	0.8714	Medium	7.78	8.1	0.863	6.635	0.8728	Medium	7.79	8.11	1.699	13.07	0.8801	Medium	7.79	8.11	1.617	12.439	0.873	Medium	7.79	8.1	1.7	13.073	0.8578	Medium	7.78	8.1	3.1	23.849	0.8955	Medium	7.79
Gedatolisib	122	149	LRYWKATHRSPGQIHLVQRHPPSEESQA	6.41	5	23	6.52	6.91	2.54	11.042	0.8274	Medium	6.52	6.91	2.353	10.229	0.8657	Medium	6.52	6.91	2.595	11.283	0.8638	Medium	6.52	6.92	4.038	17.558	0.8308	Medium	6.52	6.91	3.981	17.307	0.8704	Medium	6.52	6.91	4.128	17.95	0.8121	Medium	6.52	6.91	6.357	27.64	0.8265	Medium	6.52
Gedatolisib	125	149	WKATHRSPGQIHLVQRHPPSEESQA	5.89	4	20	5.91	6.26	3.272	16.36	0.785	Medium	5.91	6.26	2.913	14.566	0.8149	Medium	5.91	6.26	3.238	16.192	0.7986	Medium	5.92	6.26	4.462	22.308	0.7978	Medium	5.92	6.26	4.382	21.912	0.8005	Medium	5.91	6.26	4.444	22.222	0.7423	Medium	5.91	6.26	6.026	30.132	0.7795	Medium	5.91
Gedatolisib	138	149	VQRHPPSEESQA	3.99	2	8	4.13	4.49	3.338	41.72	0.9351	High	4.13	4.49	3.231	40.39	0.9234	High	4.13	4.48	3.347	41.834	0.9315	High	4.14	4.49	4.226	52.822	0.9388	High	4.31	4.39	4.066	50.819	0.9403	High	4.13	4.49	4.14	51.753	0.9324	Medium	4.13	4.48	5.05	63.123	0.9314	Medium	4.13
Gedatolisib	138	150	VQRHPPSEESQAF	6.68	2	9	6.87	7.15	3.1	34.449	0.8172	Medium	6.87	7.15	3.023	33.59	0.8097	Medium	6.87	7.15	3.154	35.04	0.8171	Medium	6.87	7.15	4.211	46.79	0.8173	Medium	6.87	7.15	4.289	47.652	0.8051	Medium	6.87	7.15	4.26	47.335	0.803	Medium	6.87	7.15	5.471	60.788	0.7964	Medium	6.87
Gedatolisib	150	157	FQRQLTAL	9.15	2	6	9.5	9.54	0.178	2.966	0.9134	Medium	9.5	9.54	0.177	2.955	0.8989	Medium	9.5	9.54	0.178	2.96	0.9022	Medium	9.5	9.54	0.354	5.897	0.9087	Medium	9.5	9.54	0.362	6.031	0.9135	Medium	9.5	9.54	0.367	6.122	0.9052	Medium	9.5	9.54	1.09	18.161	0.9024	Medium	9.5
Gedatolisib	151	157	QRQLTAL	8.12	2	5	8.3	8.51	0.234	4.684	0.9258	Medium	8.3	8.51	0.203	4.061	0.918	Medium	8.3	8.51	0.221	4.429	0.9238	Medium	8.3	8.51	0.385	7.706	0.9351	Medium	8.3	8.51	0.36	7.194	0.9253	Medium	8.3	8.51	0.417	8.346	0.9288	Medium	8.3	8.51	1.063	21.266	0.9212	Medium	8.3
Gedatolisib	158	164	IGYDVTD	8.23	1	5	8.46	8.68	0.794	15.887	0.9177	High	8.46	8.68	0.739	14.778	0.9125	High	8.46	8.68	0.781	15.611	0.924	Medium	8.46	8.69	1.074	21.479	0.9188	High	8.46	8.68	1.055	21.105	0.9181	High	8.46	8.68	1.135	22.691	0.912	Medium	8.46	8.68	2.266	45.321	0.9137	Medium	8.46
Gedatolisib	158	173	IGYDVTDVSNVHDDEL	10.34	2	14	10.49	10.84	3.484	24.883	0.856	Medium	10.49	10.84	3.451	24.652	0.8343	Medium	10.49	10.84	3.546	25.327	0.843	Medium	10.49	10.84	4.761	34.009	0.8291	Medium	10.49	10.84	4.689	33.49	0.8528	Medium	10.49	10.84	4.709	33.635	0.8044	Medium	10.49	10.84	5.979	42.709	0.8442	Medium	10.49
Gedatolisib	158	174	IGYDVTDVSNVHDDELE	9.9	2	15	10.09	10.43	3.55	23.668	0.8992	Medium	10.09	10.43	3.526	23.504	0.8998	Medium	10.09	10.43	3.607	24.045	0.8954	Medium	10.09	10.43	4.77	31.797	0.8941	Medium	10.09	10.43	4.671	31.142	0.9043	Medium	10.09	10.43	4.689	31.257	0.8809	Medium	10.09	10.43	6.298	41.986	0.8921	Medium	10.09
Gedatolisib	158	175	IGYDVTDVSNVHDDELEF	12.15	2	16	12.27	12.53	3.421	21.382	0.8272	Medium	12.27	12.53	3.388	21.172	0.8476	Medium	12.27	12.53	3.407	21.294	0.8439	Medium	12.28	12.54	4.653	29.084	0.8231	Medium	12.28	12.54	4.693	29.331	0.8584	Medium	12.28	12.54	4.508	28.178	0.8279	Medium	12.27	12.53	6.01	37.565	0.8449	Medium	12.28
Gedatolisib	161	173	DVTDVSNVHDDEL	9.02	1	11	9.19	9.42	3.199	29.081	0.8285	Medium	9.19	9.42	3.241	29.466	0.7886	Medium	9.19	9.42	3.341	30.373	0.7859	Medium	9.19	9.42	4.411	40.096	0.8351	Medium	9.19	9.42	4.306	39.149	0.799	Medium	9.19	9.42	4.35	39.548	0.8153	Medium	9.18	9.42	5.059	45.992	0.7884	Medium	9.19
Gedatolisib	161	174	DVTDVSNVHDDELE	8.39	2	12	8.56	8.87	3.31	27.58	0.927	High	8.56	8.87	3.245	27.041	0.9275	High	8.56	8.87	3.378	28.152	0.9343	High	8.57	8.87	4.41	36.751	0.9297	High	8.57	8.87	4.354	36.281	0.9344	High	8.57	8.87	4.39	36.58	0.9345	High	8.56	8.87	5.409	45.079	0.9152	Medium	8.57
Gedatolisib	161	175	DVTDVSNVHDDELEF	11.36	2	13	11.55	11.84	3.127	24.051	0.885	Medium	11.55	11.84	3.126	24.046	0.8907	Medium	11.55	11.84	3.125	24.037	0.8945	Medium	11.55	11.84	4.165	32.041	0.8979	Medium	11.55	11.84	4.182	32.166	0.886	Medium	11.55	11.84	4.066	31.278	0.8942	Medium	11.55	11.84	4.943	38.023	0.8804	Medium	11.55
Gedatolisib	165	173	VSNVHDDEL	7.22	2	7	7.38	7.61	1.492	21.31	0.8359	Medium	7.38	7.61	1.475	21.071	0.821	Medium	7.38	7.61	1.558	22.259	0.8114	Medium	7.39	7.61	2.523	36.045	0.819	Medium	7.38	7.61	2.446	34.943	0.7916	Medium	7.38	7.61	2.532	36.169	0.7835	Medium	7.38	7.61	2.88	41.144	0.8065	Medium	7.38
Gedatolisib	165	175	VSNVHDDELEF	10.56	2	9	10.79	10.99	1.435	15.943	0.7805	Medium	10.79	10.99	1.447	16.076	0.7643	Medium	10.79	10.99	1.381	15.345	0.7598	Medium	10.79	10.99	2.302	25.578	0.7807	Medium	10.79	10.99	2.235	24.83	0.7806	Medium	10.79	10.99	2.233	24.814	0.7496	Medium	10.79	10.99	2.708	30.092	0.7819	Medium	10.79
Gedatolisib	174	182	EFTRRGLVT	7	2	7	7.23	7.5	0.317	4.532	0.9154	Medium	7.23	7.5	0.305	4.352	0.8833	Medium	7.23	7.5	0.289	4.125	0.9048	Medium	7.24	7.5	0.362	5.166	0.9126	Medium	7.23	7.5	0.333	4.757	0.9058	Medium	7.23	7.5	0.424	6.051	0.8892	Medium	7.23	7.5	0.725	10.364	0.907	Medium	7.23
Gedatolisib	174	195	EFTRRGLVTPRMAEVASRDPKL	8.28	5	18	8.35	8.77	1.378	7.656	0.7551	Medium	8.36	8.77	1.224	6.802	0.8069	Medium	8.35	8.77	1.381	7.671	0.7981	Medium	8.36	8.78	1.994	11.076	0.7283	Medium	8.36	8.78	1.908	10.602	0.813	Medium	8.36	8.78	1.939	10.77	0.72	Medium	8.35	8.77	3.653	20.296	0.7438	Medium	8.36
Gedatolisib	175	182	FTRRGLVT	6.2	1	6	6.52	6.6	0.285	4.753	0.8804	Medium	6.53	6.6	0.239	3.99	0.8722	Medium	6.53	6.6	0.332	5.533	0.8779	Medium	6.53	6.61	0.346	5.761	0.8809	Medium	6.53	6.6	0.312	5.198	0.8608	Medium	6.53	6.6	0.396	6.597	0.8674	Medium	6.52	6.6	0.65	10.837	0.8632	Medium	6.53
Gedatolisib	175	185	FTRRGLVTPRM	7.37	3	8	7.39	7.72	0.078	0.969	0.6826	Medium	7.39	7.72	0.043	0.541	0.7044	Medium	7.39	7.72	0.068	0.846	0.6938	Medium	7.39	7.72	0.11	1.375	0.6519	Medium	7.39	7.72	0.113	1.409	0.7058	Medium	7.39	7.72	0.096	1.201	0.6105	Medium	7.39	7.72	0.442	5.519	0.6665	Medium	7.63
Gedatolisib	176	182	TRRGLVT	4.73	2	5	5.01	5.27	0.258	5.155	0.9499	Medium	5.01	5.27	0.23	4.592	0.9499	Medium	5.01	5.27	0.245	4.908	0.9493	Medium	5.02	5.27	0.315	6.298	0.9351	Medium	5.02	5.27	0.303	6.055	0.953	Medium	5.01	5.27	0.348	6.957	0.9455	Medium	5.01	5.27	0.678	13.562	0.9396	Medium	5.02
Gedatolisib	176	185	TRRGLVTPRM	6.52	2	7	6.86	6.89	0.293	4.186	0.751	Medium	6.86	6.89	0.309	4.415	0.7521	Medium	6.86	6.89	0.344	4.916	0.7244	Medium	6.87	6.89	0.421	6.012	0.75	Medium	6.85	6.91	0.427	6.101	0.7579	Medium	6.86	6.89	0.48	6.857	0.643	Medium	6.86	6.89	0.873	12.473	0.7668	Medium	6.86
Gedatolisib	176	187	TRRGLVTPRMAE	6.56	3	9	6.64	6.75	0.392	4.354	0.8849	Medium	6.64	6.75	0.321	3.564	0.8797	Medium	6.64	6.75	0.377	4.194	0.8868	Medium	6.65	6.76	0.433	4.81	0.8826	Medium	6.65	6.75	0.415	4.609	0.9008	Medium	6.64	6.75	0.532	5.906	0.8613	Medium	6.6	6.67	1.108	12.31	0.8658	Medium	6.64
Gedatolisib	186	195	AEVASRDPKL	5.99	2	7	6.25	6.46	1.291	18.441	0.949	Medium	6.25	6.46	1.189	16.984	0.9387	Medium	6.25	6.46	1.317	18.812	0.939	Medium	6.25	6.46	1.865	26.64	0.9342	Medium	6.25	6.46	1.865	26.644	0.9259	Medium	6.25	6.46	1.92	27.429	0.9343	Medium	6.25	6.46	2.95	42.146	0.9405	Medium	6.25
Gedatolisib	188	195	VASRDPKL	5.31	2	5	5.53	5.76	1.236	24.713	0.9426	Medium	5.53	5.76	1.143	22.859	0.905	Medium	5.67	5.74	1.212	24.245	0.9377	High	5.54	5.77	1.765	35.303	0.9299	Medium	5.54	5.76	1.704	34.074	0.9242	Medium	5.53	5.76	1.77	35.409	0.9142	Medium	5.53	5.76	2.421	48.413	0.9384	Medium	5.54
Gedatolisib	196	211	YAMHPWVTSKPLPEYL	11.83	2	11	11.81	12.32	3.1	28.18	0.9402	High	11.81	12.32	3.024	27.492	0.9248	High	11.81	12.32	3.092	28.107	0.9178	High	11.81	12.33	4.091	37.192	0.9295	High	11.82	12.33	4.057	36.88	0.93	High	11.81	12.33	4.045	36.777	0.9357	High	11.81	12.32	5.31	48.271	0.9242	High	11.81
Gedatolisib	196	221	YAMHPWVTSKPLPEYLWKKIANNCIF	13.03	4	21	13.26	13.52	6.993	33.298	0.832	Medium	13.26	13.52	6.951	33.101	0.7291	Medium	13.26	13.52	6.997	33.32	0.7756	Medium	13.27	13.53	9.475	45.117	0.813	Medium	13.27	13.53	9.287	44.222	0.7619	Medium	13.27	13.53	9.295	44.26	0.7376	Medium	13.26	13.52	12.098	57.608	0.793	Medium	13.27
Gedatolisib	212	221	WKKIANNCIF	10.5	1	8	10.6	11	1.99	24.872	0.8747	Medium	10.6	11	1.915	23.941	0.8627	Medium	10.6	11	2.012	25.145	0.8676	Medium	10.6	11	3.034	37.923	0.8608	Medium	10.61	11	2.952	36.902	0.856	Medium	10.61	11	2.974	37.17	0.864	Medium	10.6	11	4.464	55.796	0.8418	Medium	10.61
Gedatolisib	222	232	IVIHRSTTSQT	4.69	2	9	4.8	5.11	3.205	35.616	0.9208	Medium	4.86	4.94	3.024	33.605	0.9115	Medium	4.8	5.11	3.117	34.636	0.9319	Medium	4.92	5	3.346	37.173	0.9435	High	4.81	5.11	3.249	36.105	0.9094	Medium	4.8	5.11	3.294	36.595	0.9249	Medium	4.8	5.11	3.494	38.82	0.9008	Medium	4.81
Gedatolisib	222	245	IVIHRSTTSQTIKVSPDDTPGAIL	9.09	4	20	9.11	9.59	2.607	13.034	0.9167	High	9.11	9.59	2.509	12.543	0.9052	High	9.11	9.59	2.669	13.343	0.913	High	9.12	9.6	3.383	16.916	0.9131	High	9.11	9.59	3.285	16.426	0.9078	High	9.11	9.59	3.303	16.516	0.9027	High	9.11	9.59	4.247	21.235	0.8969	High	9.11
Gedatolisib	233	245	IKVSPDDTPGAIL	9.96	2	9	10.16	10.46	1.059	11.77	0.9192	Medium	10.16	10.46	0.991	11.008	0.901	Medium	10.16	10.46	1.086	12.069	0.8919	Medium	10.16	10.46	1.3	14.448	0.9162	Medium	10.16	10.46	1.234	13.713	0.8972	Medium	10.16	10.46	1.32	14.672	0.9086	Medium	10.16	10.46	2.074	23.046	0.9026	Medium	10.16
Gedatolisib	249	269	FTKMAKKKSLMDIPESQSEQD	7.32	3	18	7.46	7.82	9.882	54.901	0.9305	High	7.46	7.82	9.614	53.414	0.913	High	7.46	7.82	9.96	55.335	0.9188	High	7.46	7.82	10.391	57.726	0.9228	High	7.46	7.82	10.263	57.017	0.9242	High	7.46	7.82	10.372	57.622	0.9025	High	7.46	7.82	10.514	58.411	0.9322	High	7.46
Gedatolisib	250	269	TKMAKKKSLMDIPESQSEQD	7.4	2	17	7.26	7.49	9.263	54.49	0.728	Medium	7.26	7.49	9.211	54.185	0.7637	Medium	7.4	7.47	9.078	53.399	0.7143	Medium	7.26	7.5	10.145	59.675	0.7743	Medium	7.26	7.49	10.299	60.581	0.7662	Medium	7.26	7.49	10.229	60.169	0.7432	Medium	7.32	7.4	10.197	59.979	0.6961	Medium	7.26
Gedatolisib	270	278	FVLRVCGRD	8.8	3	7	8.98	9.29	0.384	5.483	0.8596	Medium	8.98	9.3	0.31	4.432	0.8424	Medium	8.98	9.29	0.37	5.29	0.8441	Medium	8.98	9.29	0.499	7.125	0.8613	Medium	8.98	9.3	0.423	6.046	0.8417	Medium	8.98	9.3	0.484	6.916	0.8455	Medium	8.98	9.29	0.9	12.855	0.8584	Medium	8.98
Gedatolisib	270	281	FVLRVCGRDEYL	11.19	3	10	11.4	11.64	0.341	3.41	0.8993	High	11.4	11.64	0.257	2.568	0.917	High	11.4	11.64	0.34	3.403	0.9205	High	11.4	11.65	0.369	3.693	0.9092	High	11.4	11.65	0.335	3.351	0.9347	High	11.4	11.65	0.386	3.856	0.9235	High	11.4	11.64	0.749	7.489	0.9291	High	11.4
Gedatolisib	273	281	RVCGRDEYL	8.04	3	7	7.85	8.22	0.265	3.79	0.7734	Medium	7.85	8.22	0.195	2.788	0.7962	Medium	7.85	8.22	0.297	4.239	0.7925	Medium	7.86	8.23	0.246	3.521	0.7733	Medium	7.85	8.22	0.194	2.774	0.7998	Medium	7.85	8.22	0.299	4.269	0.7969	Medium	7.85	8.22	0.523	7.475	0.7602	Medium	7.85
Gedatolisib	279	291	EYLVGETPIKNFQ	10.68	2	10	10.63	10.84	1.232	12.32	0.7547	Medium	10.63	10.84	1.249	12.492	0.7564	Medium	10.63	10.84	1.325	13.25	0.7494	Medium	10.63	10.84	1.595	15.95	0.7673	Medium	10.63	10.84	1.572	15.72	0.7471	Medium	10.63	10.84	1.613	16.132	0.7595	Medium	10.63	10.84	1.71	17.098	0.7551	Medium	10.63
Gedatolisib	282	291	VGETPIKNFQ	8.12	2	7	8.16	8.61	0.714	10.202	0.8931	Medium	8.16	8.62	0.667	9.531	0.8771	Medium	8.16	8.61	0.718	10.253	0.8827	Medium	8.17	8.62	0.719	10.271	0.8884	Medium	8.16	8.62	0.669	9.552	0.8836	Medium	8.16	8.62	0.745	10.639	0.886	Medium	8.16	8.61	0.811	11.589	0.883	Medium	8.16
Gedatolisib	282	307	VGETPIKNFQWVRHCLKNGEEIHVVL	11.35	5	23	11.41	11.85	1.305	5.676	0.8799	Medium	11.41	11.85	1.209	5.258	0.876	Medium	11.41	11.84	1.36	5.914	0.8765	Medium	11.41	11.85	3.215	13.98	0.8691	Medium	11.41	11.85	3.235	14.066	0.8778	Medium	11.41	11.85	3.192	13.88	0.8595	Medium	11.41	11.85	4.301	18.698	0.8683	Medium	11.41
Gedatolisib	292	302	WVRHCLKNGEE	5.42	2	9	5.61	5.92	0.844	9.377	0.8709	Medium	5.61	5.92	0.711	7.905	0.8517	Medium	5.61	5.92	0.84	9.33	0.835	Medium	5.61	5.92	2.016	22.4	0.8836	Medium	5.61	5.92	1.886	20.957	0.794	Medium	5.61	5.92	2.012	22.353	0.8485	Medium	5.61	5.92	2.323	25.808	0.851	Medium	5.61
Gedatolisib	292	307	WVRHCLKNGEEIHVVL	8.82	4	14	8.99	9.32	0.912	6.514	0.8696	Medium	8.99	9.32	0.824	5.889	0.8696	Medium	8.99	9.32	1.001	7.152	0.8442	Medium	9	9.32	2.531	18.078	0.8665	Medium	9	9.32	2.425	17.322	0.8594	Medium	8.99	9.32	2.442	17.445	0.8552	Medium	8.99	9.32	3.389	24.209	0.8615	Medium	8.99
Gedatolisib	308	315	DTPPDPAL	8.44	1	3	8.5	8.93	0.632	21.08	0.897	Medium	8.5	8.93	0.612	20.384	0.8881	Medium	8.5	8.93	0.681	22.705	0.8894	Medium	8.5	8.94	1.311	43.694	0.8922	Medium	8.5	8.94	1.267	42.242	0.892	Medium	8.5	8.94	1.296	43.21	0.8795	Medium	8.5	8.93	1.644	54.796	0.8919	Medium	8.5
Gedatolisib	316	335	DEVRKEEWPLVDDCTGVTGY	12.57	2	17	12.68	12.95	6.412	37.72	0.8636	Medium	12.68	12.95	6.299	37.051	0.8701	Medium	12.68	12.95	6.369	37.462	0.8498	Medium	12.68	12.96	7.719	45.407	0.8707	Medium	12.68	12.96	7.684	45.201	0.8503	Medium	12.68	12.96	7.497	44.098	0.8694	Medium	12.68	12.95	8.383	49.313	0.8485	Medium	12.68
Gedatolisib	316	339	DEVRKEEWPLVDDCTGVTGYHEQL	11.93	2	21	11.78	12.28	6.939	33.044	0.884	Medium	11.78	12.28	6.752	32.155	0.8857	High	11.78	12.28	6.837	32.559	0.8676	Medium	11.78	12.28	8.468	40.322	0.887	Medium	11.78	12.29	8.6	40.951	0.8927	High	11.78	12.28	8.317	39.607	0.8802	High	11.78	12.28	9.794	46.637	0.8736	High	11.78
Gedatolisib	316	350	DEVRKEEWPLVDDCTGVTGYHEQLTIHGKDHESVF	11.04	5	32	11.22	11.56	6.798	21.243	0.8619	Medium	11.23	11.56	7.136	22.3	0.8758	Medium	11.22	11.56	7.083	22.134	0.8739	Medium	11.23	11.56	9.058	28.307	0.8723	Medium	11.23	11.56	9.166	28.643	0.8833	High	11.23	11.56	8.986	28.081	0.8678	Medium	11.22	11.56	11.359	35.498	0.853	Medium	11.23
Gedatolisib	336	350	HEQLTIHGKDHESVF	7.44	2	13	7.65	7.93	1.813	13.948	0.7507	Medium	7.65	7.94	1.933	14.869	0.7631	Medium	7.65	7.93	2.028	15.598	0.7352	Medium	7.66	7.94	2.876	22.124	0.7661	Medium	7.65	7.94	2.916	22.431	0.7317	Medium	7.65	7.94	3.081	23.703	0.6946	Medium	7.65	7.93	4.657	35.822	0.7357	Medium	7.65
Gedatolisib	340	350	TIHGKDHESVF	6.78	2	9	6.9	7.19	1.337	14.853	0.8596	Medium	6.9	7.19	1.411	15.675	0.8596	Medium	6.9	7.19	1.409	15.653	0.8514	Medium	6.91	7.19	1.942	21.574	0.8671	Medium	6.91	7.19	1.913	21.257	0.8402	Medium	6.9	7.19	1.989	22.102	0.8467	Medium	6.9	7.19	2.543	28.255	0.8516	Medium	6.91
Gedatolisib	355	361	WDCDRKF	8.97	3	5	8.98	9.11	0.329	6.582	0.8261	Medium	9.05	9.12	0.396	7.916	0.886	Medium	8.98	9.11	0.482	9.635	0.8834	Medium	8.99	9.12	1.005	20.097	0.8703	Medium	8.99	9.11	0.912	18.23	0.8544	Medium	8.99	9.11	0.992	19.841	0.8565	Medium	8.98	9.11	1.367	27.349	0.7408	Medium	8.99
Gedatolisib	355	379	WDCDRKFRVKIRGIDIPVLPRNTDL	10.5	4	21	10.68	10.8	2.834	13.496	0.6173	Medium	10.68	10.8	2.649	12.614	0.7267	Medium	10.68	10.8	2.793	13.302	0.7202	Medium	10.66	10.73	3.779	17.997	0.6679	Medium	10.68	10.8	3.812	18.152	0.7511	Medium	10.68	10.8	3.634	17.303	0.7242	Medium	10.67	10.75	4.209	20.043	0.633	Medium	10.68
Gedatolisib	355	381	WDCDRKFRVKIRGIDIPVLPRNTDLTV	10.77	4	23	10.98	11.23	3.029	13.171	0.617	Medium	10.98	11.23	3.053	13.276	0.6754	Medium	10.98	11.23	2.985	12.976	0.6957	Medium	10.98	11.23	4.503	19.577	0.6713	Medium	10.98	11.24	4.289	18.65	0.6924	Medium	10.98	11.24	4.375	19.02	0.6845	Medium	10.98	11.23	5.739	24.952	0.6177	Medium	10.98
Gedatolisib	370	381	IPVLPRNTDLTV	10.11	2	9	10.41	10.52	3.553	39.48	0.8611	Medium	10.41	10.52	3.518	39.093	0.9085	Medium	10.41	10.52	3.579	39.772	0.9003	Medium	10.41	10.52	4.562	50.694	0.8767	Medium	10.41	10.52	4.467	49.629	0.8882	Medium	10.41	10.52	4.507	50.079	0.8855	Medium	10.41	10.52	5.379	59.772	0.8149	Medium	10.41
Gedatolisib	380	394	TVFVEANIQHGQQVL	10.36	2	13	10.44	10.6	1.166	8.965	0.7403	Medium	10.45	10.6	1.089	8.375	0.8122	Medium	10.44	10.6	1.114	8.568	0.8156	Medium	10.44	10.6	1.401	10.78	0.7771	Medium	10.45	10.6	1.416	10.891	0.8322	Medium	10.45	10.6	1.464	11.262	0.8047	Medium	10.44	10.59	1.669	12.835	0.7431	Medium	10.45
Gedatolisib	382	394	FVEANIQHGQQVL	9.2	2	11	9.34	9.58	1.322	12.014	0.9284	Medium	9.35	9.58	1.293	11.752	0.93	High	9.34	9.58	1.391	12.643	0.9322	Medium	9.34	9.58	1.983	18.03	0.9262	High	9.35	9.58	1.945	17.678	0.9297	High	9.35	9.58	2.015	18.32	0.9282	Medium	9.34	9.58	2.16	19.632	0.9112	Medium	9.35
Gedatolisib	383	394	VEANIQHGQQVL	7.96	2	10	8.12	8.35	1.454	14.539	0.9192	Medium	8.12	8.36	1.383	13.826	0.9199	High	8.12	8.35	1.531	15.314	0.9213	High	8.13	8.36	2.315	23.146	0.9276	High	8.12	8.36	2.242	22.417	0.92	High	8.12	8.36	2.326	23.261	0.9264	High	8.12	8.35	2.541	25.412	0.9154	Medium	8.12
Gedatolisib	386	394	NIQHGQQVL	7.43	1	7	7.46	7.59	1.33	18.996	0.6893	Medium	7.46	7.59	1.305	18.645	0.7223	Medium	7.61	7.67	1.457	20.821	0.8419	Medium	7.46	7.6	2.104	30.051	0.7443	Medium	7.56	7.63	1.949	27.84	0.783	Medium	7.57	7.64	2.071	29.591	0.759	Medium	7.46	7.59	2.122	30.31	0.6932	Medium	7.46
Gedatolisib	395	406	CQRRTSPKPFTE	5.38	2	8	5.51	5.54	1.305	16.309	0.7649	Medium	5.51	5.54	1.282	16.019	0.8326	Medium	5.6	5.67	1.302	16.27	0.821	Medium	5.52	5.59	1.745	21.808	0.7529	Medium	5.51	5.55	1.794	22.424	0.7955	Medium	5.51	5.54	1.755	21.941	0.6921	Medium	5.51	5.54	2.412	30.146	0.7878	Medium	5.51
Gedatolisib	408	413	VLWNVW	14.34	1	4	14.55	14.72	0.474	11.848	0.8694	Medium	14.55	14.72	0.522	13.052	0.8921	Medium	14.55	14.71	0.543	13.576	0.8878	Medium	14.55	14.72	1.266	31.65	0.8902	Medium	14.55	14.72	1.225	30.62	0.8936	Medium	14.55	14.72	1.249	31.217	0.8915	Medium	14.55	14.72	1.717	42.935	0.8766	Medium	14.55
Gedatolisib	414	428	LEFSIKIKDLPKGAL	10.7	3	12	10.93	11.12	0.836	6.968	0.7973	Medium	10.93	11.12	0.759	6.328	0.8726	Medium	10.93	11.11	0.844	7.031	0.8819	Medium	10.93	11.12	0.962	8.013	0.8739	Medium	10.93	11.12	0.936	7.801	0.8836	Medium	10.93	11.12	0.946	7.886	0.8759	Medium	10.93	11.12	1.603	13.359	0.8102	Medium	10.93
Gedatolisib	417	428	SIKIKDLPKGAL	8.23	3	9	8.44	8.68	0.292	3.242	0.9228	High	8.44	8.68	0.22	2.449	0.9377	High	8.44	8.68	0.282	3.138	0.9114	High	8.45	8.69	0.291	3.231	0.9371	High	8.44	8.68	0.244	2.713	0.9352	High	8.44	8.68	0.332	3.692	0.9368	High	8.44	8.68	0.476	5.294	0.9258	High	8.44
Gedatolisib	417	429	SIKIKDLPKGALL	9.67	3	10	9.63	9.66	0.33	3.3	0.8671	Medium	9.63	9.66	0.254	2.545	0.9103	Medium	9.63	9.66	0.268	2.679	0.9075	Medium	9.63	9.66	0.372	3.724	0.885	Medium	9.63	9.67	0.257	2.573	0.8965	Medium	9.63	9.67	0.352	3.519	0.9038	Medium	9.63	9.66	0.495	4.949	0.8513	Medium	9.63
Gedatolisib	432	441	QIYCGKAPAL	9.16	1	7	9.38	9.43	3.238	46.263	0.7869	Medium	9.38	9.43	3.285	46.923	0.8098	Medium	9.38	9.43	3.335	47.647	0.7738	Medium	9.38	9.43	3.609	51.557	0.8334	Medium	9.38	9.43	3.581	51.155	0.7736	Medium	9.38	9.43	3.621	51.724	0.7451	Medium	9.38	9.43	3.831	54.731	0.752	Medium	9.38
Gedatolisib	461	467	LYYVNLL	14.24	2	5	14.11	14.33	0.096	1.915	0.7071	Medium	14.11	14.33	0.075	1.49	0.8061	Medium	14.11	14.33	0.112	2.235	0.7812	Medium	14.12	14.33	0.11	2.209	0.7732	Medium	14.12	14.33	0.148	2.961	0.7619	Medium	14.11	14.33	0.134	2.68	0.7835	Medium	14.11	14.33	0.371	7.426	0.667	Medium	14.11
Gedatolisib	463	468	YVNLLL	13.46	1	4	13.78	13.82	0.078	1.962	0.8192	Medium	13.78	13.82	0.092	2.304	0.8543	Medium	13.78	13.82	0.035	0.864	0.7635	Medium	13.79	13.82	0.101	2.515	0.8371	Medium	13.79	13.82	0.107	2.674	0.8187	Medium	13.79	13.82	0.088	2.191	0.7785	Medium	13.78	13.82	0.292	7.298	0.7869	Medium	13.79
Gedatolisib	467	475	LLIDHRFLL	12.02	3	7	12.37	12.47	0.166	2.374	0.7669	Medium	12.37	12.47	0.106	1.516	0.8618	Medium	12.37	12.47	0.141	2.01	0.8399	Medium	12.38	12.47	0.099	1.412	0.881	Medium	12.38	12.47	0.102	1.459	0.8351	Medium	12.38	12.47	0.177	2.525	0.8706	Medium	12.37	12.47	0.212	3.033	0.7699	Medium	12.38
Gedatolisib	467	479	LLIDHRFLLRRGE	9	4	11	9.34	9.43	0.455	4.132	0.9172	High	9.35	9.43	0.394	3.581	0.9251	High	9.34	9.43	0.448	4.075	0.9088	High	9.34	9.43	1.002	9.107	0.912	High	9.35	9.43	0.958	8.705	0.9375	High	9.35	9.43	0.997	9.06	0.9091	Medium	9.34	9.43	1.38	12.549	0.9125	High	9.35
Gedatolisib	467	480	LLIDHRFLLRRGEY	9.59	4	12	9.82	10.08	0.507	4.222	0.9138	Medium	9.82	10.08	0.429	3.571	0.9252	Medium	9.81	10.08	0.483	4.027	0.9062	Medium	9.81	10.08	1.044	8.7	0.9262	Medium	9.82	10.09	0.927	7.724	0.9122	Medium	9.82	10.09	0.991	8.257	0.9285	Medium	9.81	10.08	1.376	11.47	0.9126	Medium	9.82
Gedatolisib	485	497	WQISGKGEDQGSF	9.8	2	11	10.17	10.24	6.435	58.496	0.7636	Medium	10.17	10.24	6.442	58.565	0.7963	Medium	10.17	10.24	6.411	58.277	0.8009	Medium	10.17	10.24	6.737	61.243	0.827	Medium	10.17	10.25	6.541	59.468	0.8129	Medium	10.17	10.25	6.531	59.376	0.8237	Medium	10.17	10.24	7.29	66.27	0.7959	Medium	10.17
Gedatolisib	498	513	NADKLTSATNPDKENS	5.28	2	13	5.49	5.59	2.873	22.1	0.715	Medium	5.5	5.57	2.641	20.319	0.7993	Medium	5.49	5.59	2.874	22.106	0.7861	Medium	5.5	5.6	4.2	32.309	0.7945	Medium	5.5	5.6	3.987	30.671	0.7822	Medium	5.49	5.59	4.264	32.801	0.7881	Medium	5.49	5.59	5.414	41.648	0.6946	Medium	5.49
Gedatolisib	498	514	NADKLTSATNPDKENSM	6.42	3	14	6.63	6.79	2.851	20.365	0.7524	Medium	6.63	6.79	2.621	18.724	0.8212	Medium	6.63	6.79	2.897	20.692	0.8272	Medium	6.63	6.8	4.508	32.197	0.8093	Medium	6.63	6.8	4.379	31.275	0.808	Medium	6.63	6.79	4.52	32.289	0.8114	Medium	6.63	6.79	5.941	42.439	0.7165	Medium	6.63
Gedatolisib	498	515	NADKLTSATNPDKENSMS	6.15	3	15	6.26	6.54	2.885	19.232	0.9116	High	6.26	6.54	2.654	17.692	0.9237	High	6.26	6.54	2.997	19.982	0.9048	High	6.26	6.55	4.459	29.73	0.9252	High	6.26	6.54	4.303	28.686	0.9338	High	6.26	6.54	4.517	30.113	0.9281	High	6.26	6.54	5.966	39.773	0.9146	High	6.26
Gedatolisib	498	517	NADKLTSATNPDKENSMSIS	7.37	3	17	7.59	7.67	2.576	15.15	0.813	Medium	7.59	7.67	2.425	14.264	0.8884	Medium	7.59	7.67	2.717	15.983	0.8666	Medium	7.6	7.67	4.077	23.98	0.8605	Medium	7.59	7.67	3.99	23.473	0.8613	Medium	7.59	7.67	4.175	24.556	0.8364	Medium	7.59	7.67	5.504	32.375	0.7894	Medium	7.59
Gedatolisib	498	519	NADKLTSATNPDKENSMSISIL	10.59	3	19	10.86	10.96	2.126	11.191	0.8028	Medium	10.86	10.97	1.988	10.464	0.8096	Medium	10.85	10.96	2.096	11.032	0.7941	Medium	10.86	10.96	3.109	16.363	0.7839	Medium	10.86	10.97	3.105	16.344	0.7931	Medium	10.86	10.97	3.115	16.395	0.7585	Medium	10.85	10.96	4.087	21.51	0.7415	Medium	10.86
Gedatolisib	520	551	LDNYCHPIALPKHQPTPDPEGDRVRAEMPNQL	8.94	4	24	9.05	9.19	9.471	39.463	0.8409	Medium	9.05	9.19	9.348	38.95	0.8415	Medium	9.05	9.19	9.551	39.796	0.8316	Medium	9.06	9.19	10.703	44.594	0.8653	Medium	9.05	9.19	10.591	44.13	0.8304	Medium	9.05	9.19	10.699	44.58	0.824	Medium	9.05	9.18	11.565	48.187	0.8217	Medium	9.05
Gedatolisib	552	557	RKQLEA	4.4	2	4	4.24	4.69	0.6	14.99	0.9157	High	4.24	4.69	0.567	14.184	0.869	High	4.24	4.69	0.596	14.895	0.8945	High	4.24	4.69	0.93	23.238	0.8745	High	4.41	4.49	0.866	21.643	0.9325	High	4.24	4.69	0.983	24.584	0.8966	High	4.24	4.69	1.617	40.427	0.8942	High	4.24
Gedatolisib	557	575	AIIATDPLNPLTAEDKELL	12.88	2	15	12.81	12.89	3.121	20.804	0.7269	Medium	12.81	12.89	2.841	18.938	0.6864	Medium	12.81	12.89	3	20.001	0.6833	Medium	12.81	12.89	4.439	29.594	0.7114	Medium	12.81	12.89	4.312	28.749	0.6271	Medium	12.81	12.89	4.43	29.53	0.6986	Medium	12.81	12.89	6.898	45.986	0.666	Medium	12.81
Gedatolisib	557	578	AIIATDPLNPLTAEDKELLWHF	13.73	3	18	13.99	14	2.777	15.429	0.7177	Medium	13.99	14	2.527	14.037	0.7071	Medium	13.99	14	2.665	14.807	0.6964	Medium	14	14.01	4.197	23.314	0.6595	Medium	14	14.01	4.228	23.491	0.6593	Medium	14	14	4.28	23.78	0.6667	Medium	13.99	14	6.597	36.648	0.6486	Medium	14
Gedatolisib	558	570	IIATDPLNPLTAE	11.61	1	9	11.84	11.92	3.038	33.752	0.8805	High	11.84	11.92	3.051	33.896	0.8897	High	11.84	11.92	3.195	35.498	0.8787	Medium	11.84	11.92	4.494	49.932	0.8289	Medium	11.84	11.92	4.38	48.667	0.8475	Medium	11.84	11.92	4.47	49.664	0.9024	Medium	11.84	11.92	6.259	69.546	0.8325	Medium	11.84
Gedatolisib	558	573	IIATDPLNPLTAEDKE	10.45	2	12	10.81	10.89	3.178	26.486	0.8627	Medium	10.81	10.89	3.156	26.297	0.8539	Medium	10.8	10.89	3.223	26.862	0.8651	Medium	10.81	10.89	4.605	38.378	0.8572	Medium	10.81	10.89	4.502	37.513	0.8263	Medium	10.81	10.89	4.547	37.895	0.8576	Medium	10.8	10.89	6.573	54.772	0.8221	Medium	10.81
Gedatolisib	558	578	IIATDPLNPLTAEDKELLWHF	13.76	3	17	14.03	14.14	2.858	16.813	0.8727	Medium	14.03	14.14	2.693	15.842	0.8786	Medium	14.03	14.14	2.818	16.579	0.8693	Medium	14.03	14.14	4.108	24.166	0.861	Medium	14.03	14.14	4.054	23.847	0.8631	Medium	14.03	14.14	4.078	23.989	0.8676	Medium	14.03	14.14	6.176	36.329	0.8522	Medium	14.03
Gedatolisib	558	580	IIATDPLNPLTAEDKELLWHFRY	13.18	4	19	13.1	13.14	2.856	15.034	0.837	Medium	13.1	13.14	2.682	14.118	0.8568	Medium	13.1	13.14	2.894	15.232	0.8625	Medium	13.1	13.14	4.442	23.379	0.8361	Medium	13.1	13.14	4.429	23.312	0.839	Medium	13.1	13.14	4.473	23.54	0.866	Medium	13.1	13.14	6.964	36.654	0.8149	Medium	13.1
Gedatolisib	579	592	RYESLKHPKAYPKL	6.31	4	10	6.22	6.81	0.421	4.21	0.9134	Medium	6.22	6.81	0.375	3.746	0.9031	Medium	6.22	6.81	0.418	4.179	0.9049	Medium	6.23	6.82	1.145	11.453	0.9109	Medium	6.23	6.81	1.122	11.218	0.9075	Medium	6.22	6.81	1.185	11.851	0.9077	Medium	6.22	6.81	2.303	23.032	0.8988	Medium	6.23
Gedatolisib	593	601	FSSVKWGQQ	8.89	1	7	9.06	9.26	0.555	7.928	0.8441	Medium	9.06	9.26	0.434	6.202	0.8368	Medium	9.06	9.26	0.586	8.368	0.8365	Medium	9.07	9.27	1.074	15.343	0.8372	Medium	9.06	9.26	0.994	14.2	0.8235	Medium	9.06	9.26	1.07	15.285	0.8357	Medium	9.16	9.24	2.866	40.947	0.8141	Medium	9.06
Gedatolisib	593	605	FSSVKWGQQEIVA	10.39	2	11	10.57	10.86	0.893	8.115	0.8304	Medium	10.57	10.86	0.876	7.962	0.8287	Medium	10.57	10.86	0.95	8.632	0.8421	Medium	10.57	10.86	1.637	14.883	0.8168	Medium	10.57	10.87	1.516	13.782	0.8332	Medium	10.57	10.87	1.56	14.181	0.8136	Medium	10.57	10.86	3.445	31.317	0.8063	Medium	10.57
Gedatolisib	593	610	FSSVKWGQQEIVAKTYQL	10.78	2	16	10.99	11.07	1.073	6.704	0.8318	Medium	10.99	11.07	0.932	5.827	0.8304	Medium	10.99	11.07	0.885	5.531	0.7892	Medium	10.99	11.07	1.607	10.044	0.7826	Medium	10.99	11.08	1.592	9.952	0.8014	Medium	10.99	11.08	1.569	9.806	0.7496	Medium	10.99	11.07	3.768	23.553	0.7102	Medium	10.99
Gedatolisib	593	611	FSSVKWGQQEIVAKTYQLL	12.25	3	17	12.55	12.64	0.727	4.276	0.8314	Medium	12.55	12.64	0.738	4.34	0.8491	Medium	12.55	12.64	0.73	4.295	0.8715	Medium	12.55	12.64	1.511	8.886	0.8121	Medium	12.55	12.65	1.322	7.776	0.8437	Medium	12.55	12.64	1.297	7.629	0.8327	Medium	12.55	12.64	3.519	20.703	0.7567	Medium	12.55
Gedatolisib	602	607	EIVAKT	4.54	1	4	4.86	5.03	0.149	3.723	0.9067	Medium	4.86	5.03	0.218	5.462	0.8854	Medium	4.86	5.03	0.229	5.733	0.8986	Medium	4.87	5.03	0.252	6.295	0.8979	Medium	4.87	5.03	0.209	5.223	0.8964	Medium	4.86	5.03	0.282	7.057	0.9023	Medium	4.86	5.03	0.686	17.159	0.8987	Medium	4.86
Gedatolisib	606	611	KTYQLL	9.74	2	4	10.13	10.22	0.18	4.509	0.8289	Medium	10.13	10.22	0.113	2.823	0.8213	Medium	10.13	10.22	0.106	2.643	0.8056	Medium	10.13	10.22	0.255	6.384	0.8165	Medium	10.14	10.22	0.179	4.477	0.8066	Medium	10.22	10.29	0.228	5.689	0.8125	Medium	10.13	10.22	0.911	22.784	0.8017	Medium	10.14
Gedatolisib	611	622	LARREVWDQSAL	9.42	2	10	9.6	9.83	6.087	60.866	0.8735	Medium	9.6	9.83	6.04	60.404	0.879	Medium	9.6	9.83	6.082	60.82	0.8769	Medium	9.6	9.83	6.612	66.115	0.8781	Medium	9.6	9.83	6.484	64.838	0.8711	Medium	9.6	9.83	6.452	64.515	0.8704	Medium	9.6	9.83	6.528	65.281	0.8779	Medium	9.6
Gedatolisib	612	622	ARREVWDQSAL	9.21	3	9	9.46	9.55	5.682	63.136	0.8268	Medium	9.46	9.56	5.558	61.76	0.8229	Medium	9.46	9.55	5.443	60.483	0.8242	Medium	9.46	9.55	5.902	65.575	0.8597	Medium	9.47	9.56	5.78	64.218	0.8744	Medium	9.46	9.56	5.862	65.131	0.8278	Medium	9.46	9.55	5.861	65.117	0.8575	Medium	9.46
Gedatolisib	623	630	DVGLTMQL	12.15	1	6	12.34	12.42	0.374	6.233	0.8561	Medium	12.34	12.43	0.37	6.163	0.8687	Medium	12.44	12.51	0.313	5.222	0.848	Medium	12.34	12.43	0.955	15.909	0.8781	Medium	12.32	12.39	0.881	14.682	0.8475	Medium	12.34	12.43	1.061	17.69	0.8793	Medium	12.29	12.36	1.42	23.665	0.8497	Medium	12.34
Gedatolisib	623	631	DVGLTMQLL	13.61	2	7	13.9	13.98	0.482	6.879	0.8062	Medium	13.9	13.99	0.42	6.003	0.8329	Medium	13.9	13.98	0.487	6.955	0.8372	Medium	13.9	13.99	0.961	13.722	0.8211	Medium	13.91	13.99	0.856	12.233	0.8166	Medium	13.9	13.99	0.975	13.927	0.8021	Medium	13.87	13.93	1.341	19.164	0.7782	Medium	13.9
Gedatolisib	631	635	LDCNF	10.77	1	3	10.96	11.18	0.211	7.024	0.8816	Medium	10.96	11.18	0.185	6.182	0.867	Medium	10.96	11.18	0.266	8.871	0.878	Medium	10.96	11.18	0.488	16.26	0.8835	Medium	10.96	11.19	0.479	15.979	0.8916	Medium	10.96	11.18	0.494	16.456	0.8906	Medium	11	11.06	1.392	46.411	0.8921	Medium	10.96
Gedatolisib	636	642	SDENVRA	4.38	1	5	4.64	4.74	0.698	13.969	0.9454	Medium	4.71	4.79	0.569	11.373	0.9405	High	4.64	4.74	0.669	13.374	0.9348	Medium	4.64	4.74	0.755	15.104	0.9177	Medium	4.64	4.74	0.657	13.146	0.9427	Medium	4.64	4.74	0.73	14.595	0.9232	Medium	4.64	4.74	1.006	20.111	0.9231	Medium	4.64
Gedatolisib	643	657	IAVQKLESLEDDDVL	11.41	2	13	11.65	11.74	1.743	13.405	0.8119	Medium	11.65	11.74	1.673	12.869	0.8498	Medium	11.65	11.74	1.721	13.242	0.8437	Medium	11.65	11.74	2.387	18.361	0.8275	Medium	11.66	11.74	2.268	17.444	0.8482	Medium	11.65	11.74	2.276	17.507	0.8581	Medium	11.65	11.74	2.913	22.406	0.8145	Medium	11.65
Gedatolisib	643	662	IAVQKLESLEDDDVLHYLLQ	13.55	3	18	13.63	13.93	1.181	6.562	0.8318	Medium	13.63	13.94	1.25	6.943	0.848	Medium	13.63	13.93	1.365	7.582	0.8363	Medium	13.64	13.94	1.943	10.794	0.8072	Medium	13.64	13.94	1.942	10.787	0.8254	Medium	13.64	13.94	2.009	11.161	0.8066	Medium	13.63	13.93	3.005	16.696	0.7857	Medium	13.64
Gedatolisib	643	663	IAVQKLESLEDDDVLHYLLQL	14.29	3	19	14.3	14.46	0.938	4.937	0.7635	Medium	14.3	14.46	1.027	5.408	0.7838	Medium	14.3	14.45	1.084	5.706	0.7776	Medium	14.3	14.46	1.77	9.317	0.7639	Medium	14.3	14.46	1.701	8.954	0.7764	Medium	14.3	14.46	1.659	8.732	0.7657	Medium	14.3	14.46	2.928	15.412	0.7325	Medium	14.3
Gedatolisib	651	663	LEDDDVLHYLLQL	14.41	3	11	14.49	14.52	0.005	0.045	0.8228	Medium	14.49	14.52	0.105	0.951	0.885	Medium	14.49	14.52	0.142	1.287	0.7877	Medium	14.49	14.53	0.326	2.961	0.8482	Medium	14.49	14.53	0.363	3.3	0.7696	Medium	14.49	14.53	0.127	1.157	0.8011	Medium	14.49	14.52	1.334	12.125	0.8095	Medium	14.49
Gedatolisib	652	662	EDDDVLHYLLQ	13.33	2	9	13.51	13.55	0.371	4.119	0.6746	Medium	13.51	13.55	0.223	2.473	0.7066	Medium	13.51	13.55	0.299	3.32	0.6794	Medium	13.51	13.55	0.594	6.602	0.6911	Medium	13.51	13.55	0.414	4.595	0.6978	Medium	13.51	13.55	0.472	5.242	0.6618	Medium	13.51	13.55	1.535	17.057	0.6705	Medium	13.51
Gedatolisib	652	663	EDDDVLHYLLQL	14.38	2	10	14.4	14.49	0.515	5.153	0.6037	Medium	14.41	14.49	0.401	4.011	0.6567	Medium	14.4	14.49	0.567	5.667	0.6121	Medium	14.41	14.49	0.732	7.32	0.6342	Medium	14.41	14.49	0.726	7.264	0.6497	Medium	14.41	14.49	0.636	6.361	0.6435	Medium	14.4	14.49	1.777	17.765	0.5982	Medium	14.42
Gedatolisib	654	662	DDVLHYLLQ	12.98	2	7	13.36	13.36	0.178	2.545	0.8001	Medium	13.36	13.37	0.182	2.599	0.8405	Medium	13.36	13.36	0.118	1.686	0.8627	Medium	13.36	13.37	0.258	3.684	0.7893	Medium	13.36	13.37	0.196	2.8	0.8232	Medium	13.36	13.37	0.191	2.728	0.823	Medium	13.36	13.36	1.205	17.211	0.7186	Medium	13.36
Gedatolisib	655	662	DVLHYLLQ	12.82	2	6	12.99	13.31	0.107	1.786	0.8802	Medium	13	13.31	0.102	1.695	0.8946	Medium	12.99	13.31	0.12	1.992	0.8881	Medium	13	13.32	0.335	5.577	0.8598	Medium	13	13.32	0.325	5.42	0.8795	Medium	13	13.32	0.306	5.097	0.885	Medium	12.99	13.31	1.248	20.8	0.8591	Medium	13
Gedatolisib	655	663	DVLHYLLQL	14.29	2	7	14.4	14.77	0.147	2.098	0.9508	Medium	14.41	14.77	0.103	1.474	0.9539	Medium	14.4	14.77	0.117	1.67	0.9597	Medium	14.41	14.77	0.329	4.695	0.9581	Medium	14.41	14.77	0.28	4.001	0.949	Medium	14.41	14.77	0.324	4.629	0.9475	Medium	14.4	14.77	1.399	19.984	0.9556	Medium	14.41
Gedatolisib	658	663	HYLLQL	11.99	1	4	11.96	12.21	0.075	1.864	0.8131	Medium	11.96	12.22	0.057	1.431	0.8427	Medium	11.96	12.21	0.068	1.702	0.7068	Medium	11.96	12.22	0.125	3.128	0.7999	Medium	11.97	12.22	0.141	3.523	0.7985	Medium	11.97	12.22	0.121	3.018	0.7764	Medium	11.96	12.21	0.548	13.705	0.7683	Medium	11.97
Gedatolisib	663	677	LVQAVKFEPYHDSAL	9.69	3	12	10.1	10.13	0.431	3.595	0.8567	Medium	10.1	10.13	0.373	3.108	0.8734	Medium	10.1	10.13	0.408	3.4	0.8673	Medium	10.1	10.13	0.85	7.086	0.8705	Medium	10.1	10.14	0.766	6.385	0.8661	Medium	10.1	10.14	0.813	6.773	0.8656	Medium	10.1	10.13	0.935	7.794	0.8509	Medium	10.1
Gedatolisib	664	677	VQAVKFEPYHDSAL	9.26	2	11	9.43	9.67	0.438	3.985	0.9103	Medium	9.43	9.67	0.39	3.542	0.9147	Medium	9.43	9.67	0.419	3.811	0.9305	Medium	9.43	9.67	0.845	7.678	0.9174	Medium	9.43	9.68	0.791	7.191	0.9165	Medium	9.43	9.67	0.837	7.609	0.9189	Medium	9.43	9.67	0.995	9.045	0.8978	Medium	9.43
Gedatolisib	666	677	AVKFEPYHDSAL	8.99	2	9	9.2	9.25	0.388	4.308	0.8374	Medium	9.2	9.25	0.392	4.353	0.8488	Medium	9.2	9.25	0.459	5.102	0.8025	Medium	9.21	9.26	0.843	9.37	0.8514	Medium	9.21	9.26	0.801	8.899	0.8332	Medium	9.2	9.26	0.884	9.827	0.8189	Medium	9.2	9.26	1.005	11.172	0.8253	Medium	9.2
Gedatolisib	681	697	LLKRGLRNKRIGHFLFW	10.28	5	15	10.54	10.78	0.194	1.291	0.8665	Medium	10.55	10.78	0.113	0.756	0.8811	Medium	10.54	10.78	0.162	1.077	0.8776	Medium	10.54	10.78	0.135	0.897	0.8711	Medium	10.55	10.78	0.114	0.763	0.8821	Medium	10.55	10.78	0.175	1.165	0.8799	Medium	10.54	10.78	0.232	1.548	0.8293	Medium	10.55
Gedatolisib	698	713	FLRSEIAQSRHYQQRF	7.69	4	14	7.76	8.19	0.781	5.578	0.8276	Medium	7.76	8.19	0.711	5.077	0.8224	Medium	7.76	8.19	0.805	5.75	0.7969	Medium	7.76	8.19	1.173	8.382	0.8182	Medium	7.76	8.19	1.143	8.163	0.8079	Medium	7.76	8.19	1.223	8.739	0.7821	Medium	7.76	8.19	2.645	18.895	0.8364	Medium	7.76
Gedatolisib	700	713	RSEIAQSRHYQQRF	5.94	4	12	6.06	6.34	0.648	5.403	0.9232	Medium	6.06	6.34	0.508	4.23	0.9337	High	6.06	6.34	0.594	4.951	0.9016	High	6.07	6.34	0.95	7.92	0.9271	High	6.07	6.34	0.858	7.147	0.9247	High	6.06	6.34	0.993	8.275	0.9293	High	6.06	6.34	2.152	17.932	0.9014	Medium	6.07
Gedatolisib	704	713	AQSRHYQQRF	6.13	3	8	6.13	6.17	0.54	6.749	0.7448	Medium	6.13	6.17	0.517	6.458	0.8111	Medium	6.13	6.17	0.57	7.119	0.7524	Medium	6.13	6.18	0.866	10.82	0.7983	Medium	6.13	6.18	0.719	8.99	0.7916	Medium	6.13	6.17	0.882	11.019	0.7718	Medium	6.13	6.17	1.714	21.42	0.7472	Medium	6.13
Gedatolisib	714	719	AVILEA	9.26	1	4	9.51	9.58	0.048	1.195	0.7902	Medium	9.51	9.58	0.047	1.169	0.8109	Medium	9.51	9.58	0.041	1.028	0.7665	Medium	9.51	9.58	0.058	1.46	0.7824	Medium	9.52	9.58	0.03	0.744	0.8047	Medium	9.52	9.58	0.034	0.844	0.7731	Medium	9.51	9.58	0.061	1.522	0.8017	Medium	9.52
Gedatolisib	720	729	YLRGCGTAML	9.99	2	8	10.43	10.54	0.323	4.041	0.8569	Medium	10.43	10.55	0.249	3.113	0.893	Medium	10.43	10.54	0.317	3.966	0.8815	Medium	10.43	10.54	0.76	9.495	0.8568	Medium	10.43	10.55	0.622	7.781	0.8153	Medium	10.43	10.55	0.737	9.209	0.8826	Medium	10.43	10.54	1.254	15.678	0.8335	Medium	10.43
Gedatolisib	729	738	LHDFTQQVQV	9.15	2	8	9.38	9.5	0.251	3.136	0.8102	Medium	9.38	9.51	0.153	1.908	0.8192	Medium	9.38	9.5	0.241	3.015	0.7969	Medium	9.38	9.5	0.242	3.024	0.811	Medium	9.38	9.51	0.13	1.619	0.8031	Medium	9.38	9.51	0.191	2.394	0.7887	Medium	9.38	9.5	0.181	2.257	0.781	Medium	9.38
Gedatolisib	730	737	HDFTQQVQ	6.37	1	6	6.61	6.77	0.164	2.741	0.7006	Medium	6.61	6.77	0.156	2.6	0.7406	Medium	6.61	6.77	0.128	2.138	0.7172	Medium	6.61	6.77	0.152	2.536	0.7118	Medium	6.61	6.77	0.131	2.178	0.7327	Medium	6.61	6.77	0.19	3.174	0.6677	Medium	6.61	6.77	0.204	3.405	0.6684	Medium	6.61
Gedatolisib	730	738	HDFTQQVQV	8.35	2	7	8.5	8.73	0.22	3.14	0.8041	Medium	8.5	8.73	0.162	2.308	0.8057	Medium	8.5	8.73	0.145	2.075	0.7947	Medium	8.5	8.74	0.167	2.386	0.8144	Medium	8.5	8.74	0.091	1.307	0.8109	Medium	8.5	8.73	0.225	3.218	0.7895	Medium	8.5	8.73	0.211	3.019	0.8153	Medium	8.5
Gedatolisib	732	737	FTQQVQ	5.59	1	4	5.85	5.87	0.18	4.508	0.7282	Medium	5.85	5.92	0.099	2.473	0.7994	Medium	5.85	5.87	0.118	2.941	0.689	Medium	5.86	5.87	0.151	3.77	0.7482	Medium	5.86	5.87	0.126	3.146	0.7606	Medium	5.85	5.87	0.101	2.53	0.6652	Medium	5.85	5.87	0.133	3.316	0.7297	Medium	5.86
Gedatolisib	736	741	VQVIEM	10.7	1	4	10.6	10.65	0.137	3.424	0.633	Medium	10.6	10.65	0.15	3.761	0.6076	Medium	10.6	10.65	0.179	4.475	0.5738	Medium	10.6	10.65	0.065	1.623	0.6267	Medium	10.6	10.65	0.122	3.057	0.6087	Medium	10.6	10.65	0.182	4.548	0.5701	Medium	10.61	10.68	0.13	3.25	0.6262	Medium	10.6
Gedatolisib	741	747	MLQKVTL	9.12	2	5	9.32	9.4	0.393	7.854	0.8172	Medium	9.32	9.4	0.397	7.941	0.8603	Medium	9.32	9.4	0.461	9.217	0.8457	Medium	9.32	9.4	1.236	24.725	0.8436	Medium	9.32	9.41	1.271	25.418	0.8564	Medium	9.32	9.41	1.25	24.994	0.8269	Medium	9.32	9.4	2.242	44.844	0.8691	Medium	9.32
Gedatolisib	742	747	LQKVTL	8.23	1	4	8.51	8.7	0.351	8.777	0.9518	Medium	8.51	8.7	0.358	8.942	0.944	Medium	8.51	8.7	0.414	10.35	0.9405	Medium	8.52	8.71	1.274	31.853	0.9132	Medium	8.65	8.72	1.177	29.432	0.9186	Medium	8.52	8.7	1.206	30.142	0.9501	Medium	8.51	8.7	2.224	55.591	0.9363	Medium	8.52
Gedatolisib	742	782	LQKVTLDIKSLSAEKYDVSSQVISQLKQKLENLQNSQLPES	12.36	5	38	12.59	12.85	18.738	49.311	0.7353	Medium	12.59	12.85	18.533	48.771	0.7525	Medium	12.59	12.85	18.741	49.318	0.7221	Medium	12.59	12.85	24.71	65.026	0.6992	Medium	12.6	12.86	24.813	65.297	0.7794	Medium	12.59	12.85	24.337	64.043	0.7256	Medium	12.59	12.85	26.704	70.273	0.7415	Medium	12.59
Gedatolisib	748	761	DIKSLSAEKYDVSS	8	2	12	8.15	8.5	9.188	76.571	0.7759	Medium	8.15	8.5	9.075	75.625	0.7574	Medium	8.15	8.5	9.204	76.697	0.7522	Medium	8.16	8.5	9.201	76.677	0.8085	Medium	8.16	8.5	9.107	75.891	0.7572	Medium	8.16	8.5	9.163	76.361	0.7622	Medium	8.15	8.5	9.18	76.503	0.7884	Medium	8.16
Gedatolisib	748	767	DIKSLSAEKYDVSSQVISQL	11.14	3	18	11.31	11.4	14.057	78.095	0.9161	High	11.31	11.4	13.926	77.367	0.9086	High	11.31	11.4	14.161	78.671	0.8988	Medium	11.31	11.4	14.17	78.72	0.9185	High	11.31	11.4	14.063	78.13	0.9137	High	11.31	11.4	13.994	77.746	0.92	High	11.31	11.4	13.908	77.267	0.9035	High	11.31
Gedatolisib	748	782	DIKSLSAEKYDVSSQVISQLKQKLENLQNSQLPES	12.56	5	32	12.53	13.05	18.491	57.783	0.8851	High	12.53	13.05	18.151	56.723	0.9005	High	12.53	13.04	18.288	57.151	0.9021	High	12.54	13.05	23.337	72.928	0.8869	High	12.54	13.05	23.316	72.863	0.9047	High	12.54	13.05	22.913	71.602	0.8954	High	12.53	13.05	24.75	77.344	0.8958	High	12.54
Gedatolisib	755	782	EKYDVSSQVISQLKQKLENLQNSQLPES	12.25	3	25	12.34	12.44	13.322	53.288	0.7958	Medium	12.34	12.44	13.425	53.701	0.8335	Medium	12.34	12.44	13.786	55.143	0.7946	Medium	12.34	12.44	18.04	72.158	0.8256	Medium	12.34	12.45	18.06	72.242	0.8277	Medium	12.34	12.44	18.055	72.222	0.832	Medium	12.34	12.44	19.758	79.031	0.8096	Medium	12.34
Gedatolisib	762	767	QVISQL	9.32	1	4	9.56	9.6	3.348	83.702	0.7889	Medium	9.56	9.6	3.347	83.674	0.779	Medium	9.56	9.6	3.367	84.183	0.7889	Medium	9.56	9.6	3.427	85.679	0.8136	Medium	9.57	9.6	3.355	83.872	0.7881	Medium	9.57	9.6	3.448	86.208	0.815	Medium	9.56	9.6	3.342	83.554	0.7796	Medium	9.58
Gedatolisib	762	782	QVISQLKQKLENLQNSQLPES	10.6	3	18	10.71	10.81	8.844	49.133	0.7364	Medium	10.71	10.81	8.706	48.369	0.7479	Medium	10.71	10.8	9.206	51.146	0.711	Medium	10.71	10.81	13.734	76.3	0.7072	Medium	10.72	10.81	13.793	76.626	0.7093	Medium	10.72	10.81	13.737	76.317	0.7223	Medium	10.71	10.8	15.572	86.51	0.7201	Medium	10.72
Gedatolisib	767	782	LKQKLENLQNSQLPES	7.51	3	13	7.62	7.93	4.767	36.673	0.808	Medium	7.62	7.93	4.724	36.341	0.8077	Medium	7.62	7.93	4.897	37.667	0.7957	Medium	7.63	7.93	8.095	62.266	0.8233	Medium	7.63	7.93	8.024	61.723	0.7875	Medium	7.63	7.93	8.052	61.935	0.7459	Medium	7.62	7.93	9.967	76.669	0.8057	Medium	7.63
Gedatolisib	768	782	KQKLENLQNSQLPES	7.11	2	12	7.21	7.61	4.541	37.838	0.9483	High	7.21	7.61	4.461	37.179	0.9412	High	7.21	7.61	4.664	38.867	0.9441	High	7.22	7.61	7.366	61.384	0.9501	High	7.22	7.61	7.318	60.985	0.9423	High	7.21	7.61	7.403	61.689	0.9438	High	7.21	7.61	9.191	76.588	0.9333	High	7.22
Gedatolisib	783	796	FRVPYDPGLKAGAL	10.17	3	10	10.49	10.6	0.414	4.142	0.8967	High	10.49	10.6	0.317	3.17	0.8907	High	10.49	10.6	0.438	4.378	0.8886	High	10.49	10.6	0.583	5.828	0.9008	High	10.49	10.6	0.509	5.087	0.8979	High	10.49	10.6	0.577	5.77	0.8975	High	10.49	10.59	1.459	14.592	0.8964	High	10.49
Gedatolisib	789	796	PGLKAGAL	10.19	1	6	10.45	10.54	0.279	4.654	0.8924	Medium	10.5	10.56	0.309	5.147	0.8552	Medium	10.45	10.54	0.306	5.1	0.8379	Medium	10.45	10.54	0.375	6.254	0.8605	Medium	10.46	10.55	0.339	5.652	0.8162	Medium	10.45	10.55	0.424	7.065	0.8236	Medium	10.45	10.54	1.008	16.805	0.8624	Medium	10.46
Gedatolisib	797	801	AIEKC	4.67	1	3	4.64	4.78	1.023	34.088	0.8198	Medium	4.64	4.78	0.987	32.886	0.862	Medium	4.64	4.78	1.01	33.67	0.8534	Medium	4.64	4.78	1.164	38.791	0.8105	Medium	4.64	4.78	1.091	36.379	0.8374	Medium	4.64	4.78	1.127	37.568	0.8214	Medium	4.64	4.78	1.691	56.374	0.7906	Medium	4.64
Gedatolisib	797	812	AIEKCKVMASKKKPLW	7	4	13	7.19	7.36	2.543	19.559	0.9212	Medium	7.19	7.36	2.4	18.461	0.9219	Medium	7.19	7.36	2.491	19.16	0.9192	Medium	7.19	7.36	3.096	23.814	0.9189	Medium	7.19	7.36	3.07	23.618	0.921	Medium	7.19	7.36	3.112	23.936	0.9195	Medium	7.19	7.36	4.486	34.509	0.9126	Medium	7.19
Gedatolisib	797	815	AIEKCKVMASKKKPLWLEF	10.45	4	16	10.6	10.9	1.962	12.264	0.914	High	10.6	10.9	1.839	11.495	0.913	High	10.6	10.9	1.867	11.668	0.9127	High	10.6	10.9	2.448	15.301	0.9057	High	10.6	10.9	2.378	14.863	0.9216	High	10.6	10.9	2.354	14.712	0.9119	High	10.59	10.9	3.418	21.363	0.9172	High	10.6
Gedatolisib	814	823	EFKCADPTAL	9.84	2	7	9.92	10.09	0.233	3.335	0.7418	Medium	9.92	10.09	0.244	3.488	0.6706	Medium	9.92	10.09	0.247	3.525	0.6685	Medium	9.92	10.09	0.365	5.212	0.6873	Medium	9.92	10.09	0.255	3.645	0.7028	Medium	9.92	10.09	0.412	5.888	0.6001	Medium	9.92	10.09	0.41	5.855	0.6967	Medium	9.92
Gedatolisib	816	823	KCADPTAL	7.06	1	5	7.25	7.36	1.198	23.965	0.8013	Medium	7.25	7.36	1.216	24.313	0.8205	Medium	7.25	7.36	1.296	25.93	0.8059	Medium	7.25	7.36	2.7	54.002	0.7918	Medium	7.25	7.36	2.644	52.887	0.77	Medium	7.25	7.36	2.723	54.466	0.7584	Medium	7.25	7.36	3.686	73.717	0.7185	Medium	7.25
Gedatolisib	816	829	KCADPTALSNETIG	8.17	2	11	8.39	8.62	4.095	37.226	0.8961	Medium	8.39	8.62	4.058	36.892	0.9111	Medium	8.39	8.62	4.222	38.383	0.9023	Medium	8.39	8.63	6.029	54.813	0.8856	Medium	8.39	8.63	5.921	53.832	0.8918	Medium	8.39	8.63	6	54.541	0.879	Medium	8.39	8.62	7.098	64.531	0.8467	Medium	8.39
Gedatolisib	816	838	KCADPTALSNETIGIIFKHGDDL	12.26	3	20	12.6	12.68	2.15	10.751	0.7697	Medium	12.6	12.68	2.308	11.54	0.7615	Medium	12.6	12.68	2.429	12.146	0.7787	Medium	12.6	12.68	3.015	15.074	0.7501	Medium	12.61	12.68	2.97	14.852	0.767	Medium	12.6	12.68	3.259	16.296	0.7514	Medium	12.6	12.68	3.629	18.145	0.741	Medium	12.6
Gedatolisib	816	842	KCADPTALSNETIGIIFKHGDDLRQDM	12.04	3	24	12.26	12.38	4.156	17.317	0.8207	Medium	12.26	12.38	4.093	17.054	0.843	Medium	12.26	12.38	4.317	17.988	0.8376	Medium	12.26	12.38	6.434	26.808	0.8202	Medium	12.26	12.39	6.406	26.691	0.8365	Medium	12.26	12.38	6.582	27.424	0.8434	Medium	12.26	12.38	8.684	36.184	0.8171	Medium	12.26
Gedatolisib	816	843	KCADPTALSNETIGIIFKHGDDLRQDML	12.57	4	25	12.73	12.84	4.083	16.331	0.8285	Medium	12.73	12.84	3.988	15.95	0.7998	Medium	12.73	12.84	4.224	16.895	0.8	Medium	12.73	12.85	6.605	26.419	0.795	Medium	12.73	12.85	6.392	25.569	0.7673	Medium	12.73	12.85	6.551	26.202	0.7576	Medium	12.73	12.84	8.737	34.949	0.7515	Medium	12.73
Gedatolisib	816	845	KCADPTALSNETIGIIFKHGDDLRQDMLIL	13.76	4	27	13.79	13.92	3.91	14.481	0.7653	Medium	13.79	13.92	3.846	14.244	0.6955	Medium	13.79	13.92	4.004	14.828	0.705	Medium	13.8	13.92	6.549	24.256	0.7771	Medium	13.8	13.92	5.972	22.118	0.6675	Medium	13.8	13.92	6.422	23.784	0.6953	Medium	13.79	13.92	7.943	29.42	0.6863	Medium	13.79
Gedatolisib	824	829	SNETIG	5.53	1	4	5.87	5.98	1.302	32.546	0.796	Medium	5.87	5.98	1.28	32.004	0.8037	Medium	5.87	5.98	1.309	32.731	0.7805	Medium	5.87	5.98	1.8	45.008	0.7931	Medium	5.87	5.98	1.746	43.645	0.7675	Medium	5.87	5.98	1.786	44.642	0.7692	Medium	5.87	5.98	1.9	47.502	0.7271	Medium	5.87
Gedatolisib	843	848	LILQIL	14.29	1	4	14.22	14.29	0.16	4.001	0.7691	Medium	14.22	14.29	0.143	3.579	0.7659	Medium	14.22	14.29	0.133	3.315	0.7286	Medium	14.22	14.29	0.163	4.065	0.7827	Medium	14.23	14.29	0.136	3.407	0.7839	Medium	14.22	14.29	0.145	3.614	0.7377	Medium	14.22	14.29	0.12	3	0.7768	Medium	14.22
Gedatolisib	844	852	ILQILRIME	13.25	2	7	13.49	13.57	0.017	0.236	0.9213	Medium	13.49	13.57	0.004	0.056	0.8662	Medium	13.49	13.57	0.031	0.438	0.8877	Medium	13.49	13.57	0.022	0.319	0.9147	Medium	13.49	13.57	0.006	0.084	0.8983	Medium	13.49	13.57	0.052	0.74	0.8944	Medium	13.49	13.57	0.031	0.442	0.8822	Medium	13.49
Gedatolisib	849	861	RIMESIWETESLD	11.9	2	11	12.08	12.16	0.486	4.421	0.7638	Medium	12.08	12.16	0.464	4.22	0.7674	Medium	12.08	12.16	0.485	4.409	0.6073	Medium	12.08	12.16	0.883	8.024	0.7882	Medium	12.08	12.16	0.871	7.922	0.7461	Medium	12.08	12.16	0.861	7.825	0.7297	Medium	12.08	12.16	1.701	15.468	0.7384	Medium	12.08
Gedatolisib	849	862	RIMESIWETESLDL	13.25	2	12	13.57	13.71	0.452	3.769	0.8595	Medium	13.58	13.71	0.49	4.086	0.8749	Medium	13.57	13.71	0.524	4.369	0.8707	Medium	13.58	13.71	0.871	7.261	0.8684	Medium	13.58	13.71	0.869	7.241	0.8689	Medium	13.58	13.71	0.911	7.596	0.8611	Medium	13.57	13.71	1.822	15.185	0.843	Medium	13.58
Gedatolisib	853	861	SIWETESLD	11.57	1	7	11.78	11.94	0.524	7.484	0.8542	Medium	11.78	11.94	0.499	7.132	0.8618	Medium	11.78	11.94	0.576	8.227	0.831	Medium	11.78	11.94	0.876	12.516	0.8535	Medium	11.78	11.94	0.823	11.757	0.8643	Medium	11.78	11.94	0.797	11.389	0.8533	Medium	11.78	11.94	1.607	22.956	0.8157	Medium	11.78
Gedatolisib	853	862	SIWETESLDL	13.36	1	8	13.6	13.71	0.423	5.284	0.8773	Medium	13.6	13.71	0.429	5.369	0.8701	Medium	13.6	13.71	0.484	6.051	0.8572	Medium	13.6	13.71	0.756	9.456	0.8803	Medium	13.6	13.71	0.736	9.198	0.8558	Medium	13.6	13.71	0.806	10.074	0.8374	Medium	13.6	13.71	1.603	20.041	0.8594	Medium	13.6
Gedatolisib	862	878	LCLLPYGCISTGDKIGM	13.08	2	14	13.31	13.4	0.527	3.761	0.9244	Medium	13.31	13.4	0.43	3.071	0.9111	Medium	13.31	13.4	0.493	3.522	0.8994	Medium	13.31	13.4	0.849	6.064	0.9243	Medium	13.31	13.4	0.715	5.11	0.9166	Medium	13.31	13.4	0.849	6.062	0.8955	Medium	13.31	13.4	1.966	14.046	0.9214	Medium	13.31
Gedatolisib	862	880	LCLLPYGCISTGDKIGMIE	13.7	3	16	13.68	13.7	0.577	3.608	0.7303	Medium	13.68	13.7	0.735	4.593	0.7127	Medium	13.68	13.7	0.459	2.868	0.6774	Medium	13.69	13.7	0.932	5.825	0.6974	Medium	13.69	13.7	0.954	5.965	0.6951	Medium	13.69	13.7	0.872	5.447	0.6799	Medium	13.68	13.7	2.093	13.081	0.7119	Medium	13.69
Gedatolisib	863	878	CLLPYGCISTGDKIGM	12.04	2	13	12.32	12.48	0.577	4.438	0.9284	Medium	12.32	12.48	0.483	3.717	0.9179	Medium	12.32	12.48	0.561	4.318	0.9133	Medium	12.33	12.49	0.904	6.954	0.9252	Medium	12.33	12.49	0.83	6.387	0.9157	Medium	12.33	12.49	0.887	6.821	0.9213	Medium	12.32	12.48	2.023	15.563	0.9171	Medium	12.33
Gedatolisib	863	880	CLLPYGCISTGDKIGMIE	12.46	2	15	12.82	12.94	0.45	3	0.8875	Medium	12.82	12.94	0.374	2.494	0.8912	Medium	12.82	12.94	0.441	2.942	0.9047	Medium	12.82	12.94	0.787	5.245	0.8994	Medium	12.82	12.94	0.709	4.726	0.888	Medium	12.82	12.94	0.796	5.308	0.9068	Medium	12.82	12.94	1.915	12.769	0.8763	Medium	12.82
Gedatolisib	865	878	LPYGCISTGDKIGM	10.57	2	12	10.72	10.78	0.645	5.372	0.7461	Medium	10.72	10.78	0.555	4.625	0.751	Medium	10.72	10.78	0.663	5.525	0.715	Medium	10.72	10.78	1.089	9.072	0.7318	Medium	10.72	10.78	0.896	7.464	0.7308	Medium	10.78	10.85	0.99	8.252	0.7527	Medium	10.72	10.78	1.929	16.075	0.7304	Medium	10.72
Gedatolisib	870	878	ISTGDKIGM	7.8	2	7	7.93	7.96	0.827	11.82	0.7936	Medium	7.95	8.02	0.733	10.475	0.7967	Medium	7.93	7.96	0.824	11.776	0.763	Medium	7.94	7.97	0.976	13.947	0.8083	Medium	7.94	7.96	0.832	11.887	0.7667	Medium	7.94	7.96	0.924	13.203	0.7141	Medium	7.93	7.96	1.396	19.947	0.8115	Medium	7.94
Gedatolisib	879	887	IEIVKDATT	7.16	1	7	7.36	7.55	1.513	21.607	0.9254	Medium	7.36	7.55	1.49	21.289	0.9167	Medium	7.36	7.55	1.592	22.742	0.9096	Medium	7.37	7.55	2.582	36.885	0.9261	Medium	7.37	7.55	2.56	36.575	0.9113	Medium	7.37	7.55	2.619	37.409	0.9033	Medium	7.36	7.55	3.715	53.074	0.9185	Medium	7.37
Gedatolisib	879	889	IEIVKDATTIA	9.23	1	9	9.37	9.46	1.649	18.321	0.8956	Medium	9.37	9.46	1.723	19.148	0.8946	Medium	9.37	9.46	1.767	19.638	0.879	Medium	9.37	9.46	2.846	31.619	0.895	Medium	9.37	9.47	2.841	31.567	0.8741	Medium	9.37	9.46	2.925	32.5	0.8721	Medium	9.37	9.46	4.035	44.832	0.8723	Medium	9.37
Gedatolisib	879	901	IEIVKDATTIAKIQQSTVGNTGA	10.2	3	21	10.22	10.43	7.353	35.016	0.7877	Medium	10.22	10.43	7.138	33.989	0.7939	Medium	10.22	10.43	7.231	34.435	0.7956	Medium	10.22	10.43	8.853	42.155	0.7736	Medium	10.22	10.43	8.601	40.957	0.7768	Medium	10.22	10.43	8.608	40.991	0.7839	Medium	10.22	10.43	10.352	49.298	0.746	Medium	10.22
Gedatolisib	879	910	IEIVKDATTIAKIQQSTVGNTGAFKDEVLNHW	12.06	4	30	11.87	12.25	9.543	31.809	0.7482	Medium	11.87	12.25	9.069	30.228	0.804	Medium	11.87	12.25	9.078	30.259	0.7884	Medium	11.87	12.25	11.549	38.498	0.7882	Medium	11.87	12.25	11.794	39.312	0.7907	Medium	11.87	12.25	11.202	37.341	0.7634	Medium	11.87	12.25	13.88	46.268	0.7201	Medium	11.87
Gedatolisib	881	887	IVKDATT	4.14	1	5	4.08	4.27	1.437	28.747	0.9248	Medium	4.08	4.27	1.418	28.354	0.9013	Medium	4.08	4.27	1.508	30.158	0.9111	Medium	4.08	4.27	2.363	47.25	0.9331	Medium	4.09	4.27	2.319	46.379	0.927	Medium	4.08	4.27	2.37	47.395	0.938	Medium	4.08	4.27	2.832	56.632	0.9169	Medium	4.08
Gedatolisib	888	901	IAKIQQSTVGNTGA	6.15	2	12	6.42	6.52	6.457	53.809	0.9218	High	6.42	6.52	6.329	52.745	0.9367	High	6.42	6.52	6.447	53.729	0.9374	High	6.43	6.52	6.909	57.574	0.9167	High	6.43	6.52	6.864	57.2	0.921	Medium	6.43	6.52	6.962	58.017	0.9379	High	6.42	6.52	7.582	63.183	0.903	Medium	6.43
Gedatolisib	902	910	FKDEVLNHW	10.1	3	7	10.44	10.52	0.308	4.402	0.8493	Medium	10.44	10.52	0.193	2.759	0.867	High	10.44	10.52	0.25	3.569	0.8863	Medium	10.44	10.52	0.337	4.816	0.8929	High	10.44	10.52	0.42	6.006	0.8589	Medium	10.44	10.52	0.387	5.531	0.9136	Medium	10.44	10.52	0.938	13.399	0.8381	Medium	10.44
Gedatolisib	902	924	FKDEVLNHWLKEKSPTEEKFQAA	9.54	3	20	9.71	9.86	1.661	8.306	0.6616	Medium	9.71	9.86	1.72	8.6	0.6697	Medium	9.71	9.86	1.703	8.516	0.6466	Medium	9.71	9.86	2.597	12.986	0.6739	Medium	9.72	9.86	2.4	11.998	0.6172	Medium	9.72	9.86	2.616	13.081	0.6694	Medium	9.71	9.86	3.84	19.201	0.605	Medium	9.72
Gedatolisib	927	934	RFVYSCAG	8.5	2	6	8.7	8.79	0.205	3.424	0.8405	Medium	8.7	8.79	0.158	2.639	0.8942	Medium	8.7	8.79	0.215	3.591	0.8802	Medium	8.71	8.8	0.179	2.979	0.8249	Medium	8.7	8.79	0.161	2.687	0.8846	Medium	8.7	8.79	0.188	3.136	0.8954	Medium	8.7	8.79	0.183	3.043	0.8207	Medium	8.7
Gedatolisib	929	934	VYSCAG	6.2	1	4	6.36	6.5	0.126	3.144	0.8967	Medium	6.36	6.5	0.105	2.613	0.8967	Medium	6.36	6.5	0.153	3.828	0.891	Medium	6.36	6.5	0.137	3.433	0.9039	Medium	6.36	6.5	0.091	2.287	0.9063	Medium	6.36	6.5	0.148	3.71	0.8814	Medium	6.36	6.5	0.138	3.456	0.8861	Medium	6.36
Gedatolisib	935	939	YCVAT	6.89	1	3	7.15	7.33	0.048	1.589	0.901	Medium	7.15	7.33	0.027	0.894	0.9	Medium	7.15	7.33	0.036	1.193	0.9069	Medium	7.16	7.34	0.035	1.168	0.9062	Medium	7.16	7.33	0.047	1.57	0.9012	Medium	7.16	7.33	0.045	1.492	0.9076	Medium	7.15	7.33	0.039	1.303	0.9072	Medium	7.16
Gedatolisib	940	953	FVLGIGDRHNDNIM	10.61	3	12	10.95	11.04	0.254	2.12	0.9212	Medium	10.95	11.04	0.23	1.914	0.9118	Medium	10.95	11.04	0.247	2.057	0.9109	Medium	10.95	11.04	0.407	3.395	0.9152	Medium	10.95	11.04	0.325	2.705	0.9109	Medium	10.95	11.04	0.379	3.161	0.9175	Medium	10.95	11.04	0.882	7.353	0.9233	Medium	10.95
Gedatolisib	954	960	ITETGNL	7.64	1	5	7.88	7.94	0.445	8.9	0.886	Medium	7.89	7.94	0.369	7.378	0.8868	Medium	7.88	7.94	0.436	8.729	0.8691	Medium	7.89	7.95	0.886	17.72	0.9177	Medium	7.89	7.95	0.865	17.296	0.8749	Medium	7.89	7.95	0.927	18.534	0.8556	Medium	7.88	7.94	1.482	29.647	0.9023	Medium	7.89
Gedatolisib	954	961	ITETGNLF	11.35	1	6	11.59	11.7	0.399	6.643	0.8752	Medium	11.59	11.7	0.354	5.898	0.8823	Medium	11.58	11.7	0.406	6.763	0.8547	Medium	11.59	11.7	0.772	12.869	0.8724	Medium	11.59	11.71	0.72	12.006	0.8454	Medium	11.59	11.71	0.78	13.005	0.869	Medium	11.58	11.7	1.189	19.809	0.8512	Medium	11.59
Gedatolisib	954	975	ITETGNLFHIDFGHILGNYKSF	13.27	2	20	13.53	13.63	5.313	26.565	0.6825	Medium	13.57	13.63	5.332	26.662	0.7227	Medium	13.53	13.63	5.297	26.485	0.7591	Medium	13.54	13.64	5.961	29.803	0.7024	Medium	13.54	13.64	5.523	27.614	0.7572	Medium	13.53	13.64	5.83	29.15	0.7146	Medium	13.53	13.63	6.029	30.146	0.6873	Medium	13.53
Gedatolisib	954	976	ITETGNLFHIDFGHILGNYKSFL	13.82	4	21	13.98	14.24	6.263	29.824	0.7279	Medium	13.98	14.24	6.254	29.779	0.7279	Medium	13.98	14.24	6.428	30.611	0.7279	Medium	13.98	14.24	7.116	33.886	0.7341	Medium	13.98	14.24	6.861	32.67	0.7344	Medium	13.98	14.24	7.002	33.341	0.7388	Medium	13.98	14.24	7.271	34.625	0.7209	Medium	13.98
Gedatolisib	954	992	ITETGNLFHIDFGHILGNYKSFLGINKERVPFVLTPDFL	13.99	5	35	14.17	14.31	9.301	26.574	0.7462	Medium	14.12	14.19	9.065	25.901	0.7128	Medium	14.17	14.31	9.226	26.361	0.7422	Medium	14.17	14.32	10.5	30.001	0.7447	Medium	14.17	14.32	10.188	29.109	0.736	Medium	14.17	14.32	10.195	29.13	0.7231	Medium	14.17	14.31	10.95	31.285	0.7391	Medium	14.17
Gedatolisib	961	971	FHIDFGHILGN	12.47	3	9	12.31	12.42	2.859	31.762	0.8628	Medium	12.48	12.55	2.65	29.447	0.9009	Medium	12.31	12.42	2.834	31.487	0.8053	Medium	12.31	12.42	3.268	36.312	0.8651	Medium	12.31	12.42	3.207	35.632	0.8123	Medium	12.31	12.42	3.256	36.176	0.8262	Medium	12.31	12.42	3.468	38.538	0.7728	Medium	12.44
Gedatolisib	961	972	FHIDFGHILGNY	12.72	3	10	13.02	13.11	3.399	33.987	0.932	High	13.02	13.11	3.273	32.731	0.9468	High	13.02	13.11	3.392	33.918	0.9416	High	13.02	13.12	3.779	37.786	0.9377	High	13.02	13.12	3.758	37.582	0.9462	High	13.02	13.12	3.732	37.316	0.9544	High	13.02	13.11	4.074	40.736	0.9471	High	13.02
Gedatolisib	961	975	FHIDFGHILGNYKSF	12.57	2	13	12.68	12.79	5.192	39.94	0.7558	Medium	12.68	12.79	5.115	39.348	0.7879	Medium	12.68	12.78	5.393	41.488	0.7317	Medium	12.68	12.79	5.873	45.178	0.7709	Medium	12.68	12.79	5.838	44.905	0.7675	Medium	12.68	12.79	5.688	43.753	0.7374	Medium	12.68	12.78	6.096	46.893	0.7497	Medium	12.68
Gedatolisib	961	991	FHIDFGHILGNYKSFLGINKERVPFVLTPDF	13.67	5	27	13.86	13.97	9.675	35.835	0.6202	Medium	13.86	13.97	9.711	35.966	0.6171	Medium	13.86	13.97	9.637	35.691	0.6248	Medium	13.86	13.97	11.213	41.528	0.6169	Medium	13.86	13.97	10.822	40.08	0.6625	Medium	13.86	13.97	10.889	40.331	0.6413	Medium	13.86	13.97	11.252	41.674	0.6342	Medium	13.86
Gedatolisib	961	992	FHIDFGHILGNYKSFLGINKERVPFVLTPDFL	13.92	4	28	13.97	14.24	8.996	32.127	0.6575	Medium	13.97	14.24	9.258	33.064	0.6658	Medium	13.97	14.24	9.341	33.362	0.6885	Medium	13.97	14.24	10.404	37.158	0.6504	Medium	13.97	14.24	10.305	36.804	0.6981	Medium	13.97	14.24	10.434	37.263	0.6646	Medium	13.97	14.24	10.683	38.154	0.6568	Medium	13.97
Gedatolisib	962	992	HIDFGHILGNYKSFLGINKERVPFVLTPDFL	13.65	5	27	13.78	13.87	9.377	34.731	0.7675	Medium	13.78	13.87	9.394	34.793	0.7971	Medium	13.78	13.87	9.498	35.179	0.8154	Medium	13.79	13.87	10.576	39.169	0.7761	Medium	13.79	13.87	10.417	38.582	0.821	Medium	13.79	13.87	10.26	37.999	0.8024	Medium	13.78	13.87	11.05	40.926	0.7673	Medium	13.79
Gedatolisib	973	992	KSFLGINKERVPFVLTPDFL	12.87	4	16	13.1	13.24	4.243	26.52	0.8959	Medium	13.1	13.24	4.121	25.755	0.9238	Medium	13.1	13.24	4.16	26.001	0.9247	Medium	13.1	13.24	4.823	30.147	0.9	Medium	13.1	13.24	4.736	29.599	0.9104	Medium	13.1	13.24	4.735	29.593	0.9157	Medium	13.1	13.24	5.104	31.899	0.8875	Medium	13.1
Gedatolisib	976	992	LGINKERVPFVLTPDFL	13.24	3	13	13.37	13.67	2.592	19.937	0.9385	High	13.37	13.67	2.512	19.321	0.9264	High	13.37	13.67	2.513	19.333	0.9323	High	13.38	13.67	3.155	24.272	0.9349	High	13.38	13.67	3.066	23.586	0.9321	High	13.38	13.67	3.076	23.664	0.938	High	13.37	13.67	3.48	26.771	0.9148	High	13.38
Gedatolisib	977	991	GINKERVPFVLTPDF	12.2	3	11	12.22	12.34	2.162	19.651	0.8097	Medium	12.22	12.34	2.073	18.843	0.8456	Medium	12.22	12.34	2.031	18.463	0.8247	Medium	12.22	12.34	2.633	23.937	0.8231	Medium	12.23	12.34	2.617	23.791	0.8042	Medium	12.23	12.34	2.579	23.442	0.8461	Medium	12.22	12.34	3.053	27.755	0.7862	Medium	12.23
Gedatolisib	977	992	GINKERVPFVLTPDFL	12.98	3	12	13.2	13.31	1.932	16.098	0.9334	Medium	13.2	13.31	1.902	15.85	0.9298	Medium	13.2	13.31	1.916	15.97	0.9256	Medium	13.2	13.31	2.508	20.896	0.9265	Medium	13.2	13.31	2.443	20.36	0.9299	Medium	13.2	13.31	2.49	20.747	0.9194	Medium	13.2	13.31	2.871	23.924	0.9035	Medium	13.2
Gedatolisib	980	992	KERVPFVLTPDFL	12.82	3	9	13.11	13.25	0.712	7.907	0.8639	Medium	13.11	13.25	0.716	7.95	0.9115	Medium	13.11	13.25	0.631	7.007	0.9175	Medium	13.12	13.25	1.199	13.319	0.885	Medium	13.12	13.25	1.043	11.592	0.8794	Medium	13.12	13.25	1.18	13.11	0.9001	Medium	13.11	13.25	1.489	16.547	0.8353	Medium	13.12
Gedatolisib	992	1014	LFVMGTSGKKTSPHFQKFQDICV	10.26	4	20	10.36	10.53	1.269	6.344	0.8408	Medium	10.36	10.53	1.132	5.658	0.8506	Medium	10.36	10.53	1.258	6.288	0.8349	Medium	10.36	10.53	1.506	7.532	0.8483	Medium	10.36	10.53	1.401	7.006	0.8449	Medium	10.36	10.53	1.394	6.97	0.8433	Medium	10.36	10.53	1.982	9.908	0.8201	Medium	10.36
Gedatolisib	993	1014	FVMGTSGKKTSPHFQKFQDICV	9.54	2	19	9.71	9.92	1.429	7.521	0.8362	Medium	9.71	9.92	1.266	6.665	0.8321	Medium	9.71	9.92	1.318	6.935	0.8125	Medium	9.71	9.92	1.676	8.821	0.8243	Medium	9.72	9.92	1.574	8.282	0.813	Medium	9.72	9.92	1.579	8.313	0.8053	Medium	9.71	9.92	2.25	11.844	0.8093	Medium	9.72
Gedatolisib	1007	1014	QKFQDICV	9.92	2	6	10.2	10.22	0.199	3.324	0.7688	Medium	10.2	10.22	0.224	3.733	0.8153	Medium	10.2	10.22	0.26	4.336	0.7459	Medium	10.2	10.22	0.229	3.822	0.7785	Medium	10.2	10.22	0.25	4.164	0.7449	Medium	10.2	10.22	0.221	3.686	0.7343	Medium	10.2	10.22	0.28	4.661	0.7161	Medium	10.2
Gedatolisib	1015	1026	KAYLALRHHTNL	6.32	3	10	6.61	6.73	0.308	3.076	0.8938	Medium	6.61	6.73	0.249	2.494	0.9133	Medium	6.61	6.73	0.28	2.801	0.8969	Medium	6.61	6.73	0.297	2.971	0.9061	Medium	6.61	6.73	0.333	3.33	0.8863	Medium	6.61	6.73	0.332	3.32	0.8883	Medium	6.61	6.73	0.638	6.382	0.9025	Medium	6.61
Gedatolisib	1015	1027	KAYLALRHHTNLL	7.7	2	11	7.99	8.14	0.242	2.198	0.7692	Medium	7.99	8.14	0.202	1.837	0.81	Medium	7.99	8.14	0.29	2.637	0.7914	Medium	8	8.14	0.366	3.324	0.7621	Medium	8	8.14	0.315	2.859	0.7876	Medium	8	8.14	0.312	2.84	0.766	Medium	7.99	8.14	0.584	5.305	0.7767	Medium	8
Gedatolisib	1017	1027	YLALRHHTNLL	8.29	2	9	8.52	8.65	0.227	2.527	0.7535	Medium	8.52	8.65	0.214	2.373	0.8065	Medium	8.52	8.65	0.308	3.427	0.7278	Medium	8.53	8.66	0.215	2.394	0.7215	Medium	8.53	8.65	0.305	3.385	0.7465	Medium	8.52	8.65	0.219	2.434	0.6973	Medium	8.52	8.65	0.522	5.8	0.7473	Medium	8.52
Gedatolisib	1019	1026	ALRHHTNL	4.23	2	6	4.33	4.54	0.389	6.478	0.9004	Medium	4.33	4.54	0.336	5.598	0.9137	Medium	4.33	4.54	0.361	6.017	0.8864	Medium	4.33	4.55	0.468	7.804	0.898	Medium	4.33	4.55	0.364	6.07	0.8915	Medium	4.33	4.54	0.409	6.822	0.8773	Medium	4.33	4.54	0.734	12.239	0.8668	Medium	4.33
Gedatolisib	1019	1027	ALRHHTNLL	6.22	2	7	6.52	6.78	0.262	3.744	0.8332	Medium	6.53	6.78	0.207	2.955	0.8409	Medium	6.53	6.78	0.279	3.979	0.8343	Medium	6.53	6.78	0.296	4.235	0.8406	Medium	6.53	6.78	0.242	3.45	0.8355	Medium	6.53	6.78	0.263	3.754	0.816	Medium	6.52	6.78	0.55	7.852	0.7951	Medium	6.53
Gedatolisib	1027	1031	LIILF	14.81	1	3	14.73	14.86	0.034	1.122	0.902	Medium	14.73	14.86	0.03	1.008	0.9108	Medium	14.73	14.86	0.027	0.9	0.9259	Medium	14.74	14.86	0.047	1.565	0.9172	Medium	14.74	14.86	0.021	0.716	0.9044	Medium	14.74	14.86	0.047	1.557	0.9119	Medium	14.73	14.86	0.033	1.113	0.8971	Medium	14.73
Gedatolisib	1031	1035	FSMML	13.4	1	3	13.82	13.89	0.04	1.323	0.9011	Medium	13.82	13.89	0.051	1.706	0.8978	Medium	13.82	13.89	0.045	1.503	0.9045	Medium	13.82	13.9	0.06	2.002	0.9017	Medium	13.82	13.9	0.06	2.012	0.8991	Medium	13.82	13.9	0.076	2.52	0.9041	Medium	13.82	13.89	0.065	2.176	0.9094	Medium	13.82
Gedatolisib	1035	1042	LMTGMPQL	11.88	1	5	12.11	12.16	1.97	39.405	0.8654	Medium	12.11	12.16	1.957	39.146	0.9052	Medium	12.11	12.16	2.028	40.56	0.8904	Medium	12.12	12.16	2.883	57.666	0.8668	Medium	12.12	12.16	2.863	57.252	0.8554	Medium	12.12	12.16	2.92	58.397	0.8805	Medium	12.11	12.16	3.794	75.882	0.8273	Medium	12.12
Gedatolisib	1035	1050	LMTGMPQLTSKEDIEY	10.99	2	13	11.12	11.38	4.744	36.491	0.8009	Medium	11.12	11.38	4.601	35.394	0.812	Medium	11.11	11.38	4.729	36.379	0.7984	Medium	11.12	11.38	6.303	48.484	0.7919	Medium	11.12	11.39	6.168	47.45	0.7963	Medium	11.12	11.39	6.111	47.008	0.8006	Medium	11.12	11.38	8.113	62.409	0.7558	Medium	11.12
Gedatolisib	1036	1042	MTGMPQL	11.2	1	4	11.31	11.4	2	50	0.7742	Medium	11.31	11.4	1.934	48.35	0.8348	Medium	11.31	11.4	1.976	49.397	0.7784	Medium	11.31	11.4	2.849	71.222	0.8011	Medium	11.31	11.4	2.769	69.237	0.7618	Medium	11.31	11.4	2.755	68.88	0.81	Medium	11.31	11.4	3.145	78.621	0.7462	Medium	11.31
Gedatolisib	1036	1049	MTGMPQLTSKEDIE	9.49	2	11	9.76	9.9	4.481	40.734	0.7599	Medium	9.77	9.9	4.432	40.286	0.7925	Medium	9.76	9.9	4.529	41.174	0.7945	Medium	9.76	9.9	5.659	51.442	0.7454	Medium	9.77	9.9	5.47	49.731	0.7987	Medium	9.77	9.9	5.683	51.66	0.7791	Medium	9.76	9.9	6.957	63.245	0.726	Medium	9.77
Gedatolisib	1050	1071	YIRDALTVGKNEEDAKKYFLDQ	9.85	4	20	9.95	10.28	2.661	13.305	0.831	Medium	9.95	10.29	2.482	12.408	0.8374	Medium	9.95	10.28	2.653	13.264	0.8307	Medium	9.95	10.28	2.988	14.938	0.8318	Medium	9.95	10.29	2.742	13.71	0.8302	Medium	9.95	10.29	2.828	14.14	0.8278	Medium	9.95	10.28	3.278	16.392	0.8166	Medium	9.95
Gedatolisib	1051	1069	IRDALTVGKNEEDAKKYFL	9.61	5	17	9.8	9.88	2.236	13.156	0.7945	Medium	9.8	9.88	2.127	12.512	0.821	Medium	9.8	9.88	2.284	13.434	0.8099	Medium	9.8	9.88	2.502	14.716	0.8179	Medium	9.8	9.88	2.308	13.579	0.8273	Medium	9.8	9.88	2.464	14.493	0.8157	Medium	9.8	9.88	2.748	16.165	0.7835	Medium	9.8
Gedatolisib	1051	1071	IRDALTVGKNEEDAKKYFLDQ	9.48	3	19	9.66	9.76	2.619	13.784	0.8344	Medium	9.66	9.76	2.481	13.057	0.8682	Medium	9.66	9.76	2.625	13.815	0.8649	Medium	9.65	9.76	2.933	15.439	0.8578	Medium	9.66	9.76	2.712	14.274	0.8575	Medium	9.66	9.76	2.959	15.572	0.865	Medium	9.65	9.76	3.171	16.691	0.8332	Medium	9.66
Gedatolisib	1051	1073	IRDALTVGKNEEDAKKYFLDQIE	10.45	4	21	10.69	10.77	2.499	11.902	0.7674	Medium	10.69	10.77	2.432	11.579	0.814	Medium	10.69	10.77	2.516	11.98	0.81	Medium	10.69	10.77	2.89	13.76	0.7688	Medium	10.69	10.77	2.682	12.77	0.8169	Medium	10.69	10.77	2.723	12.968	0.8014	Medium	10.69	10.77	3.043	14.493	0.7835	Medium	10.69
Gedatolisib	1072	1084	IEVCRDKGWTVQF	11.18	3	11	11.38	11.6	1.849	16.808	0.91	Medium	11.38	11.6	1.834	16.675	0.9038	Medium	11.37	11.6	1.932	17.561	0.9124	Medium	11.38	11.6	4.207	38.243	0.9284	Medium	11.38	11.61	4.153	37.759	0.9232	Medium	11.38	11.6	4.15	37.723	0.9299	Medium	11.38	11.6	5.446	49.509	0.9194	Medium	11.38
Gedatolisib	1074	1084	VCRDKGWTVQF	10.65	2	9	10.95	11.01	1.689	18.77	0.6962	Medium	10.95	11.02	1.699	18.874	0.7299	Medium	11.01	11.07	3.002	33.353	0.652	Medium	10.95	11.02	4.065	45.166	0.6882	Medium	10.95	11.02	4.096	45.513	0.7181	Medium	10.95	11.02	4.065	45.166	0.6885	Medium	10.89	10.96	5.202	57.804	0.621	Medium	10.95
Gedatolisib	1085	1092	NWFLHLVL	14.19	2	6	14.39	14.65	1.885	31.41	0.9552	High	14.39	14.65	1.872	31.203	0.9508	High	14.5	14.56	1.965	32.755	0.9561	High	14.39	14.65	4.438	73.973	0.9471	High	14.39	14.65	4.379	72.988	0.9414	High	14.39	14.65	4.402	73.367	0.9437	High	14.39	14.65	4.8	79.996	0.928	High	14.39
Gedatolisib	1089	1102	HLVLGIKQGEKHSA	5.79	4	12	6.22	6.29	5.786	48.219	0.7577	Medium	6.1	6.17	5.692	47.435	0.897	Medium	6.07	6.17	5.994	49.951	0.8908	Medium	6.08	6.18	6.683	55.692	0.8939	Medium	6.08	6.18	6.59	54.916	0.9145	Medium	6.07	6.17	6.827	56.89	0.8781	Medium	6.07	6.17	6.682	55.685	0.8948	Medium	6.07
Gedatolisib	1091	1102	VLGIKQGEKHSA	5.16	3	10	5.4	5.5	5.33	53.301	0.897	Medium	5.38	5.44	5.166	51.657	0.7531	Medium	5.4	5.5	5.334	53.338	0.9209	Medium	5.4	5.5	5.276	52.76	0.8986	Medium	5.4	5.5	5.25	52.501	0.9211	Medium	5.4	5.5	5.44	54.398	0.9106	Medium	5.4	5.5	5.303	53.026	0.8893	Medium	5.4
Gedatolisib	1093	1102	GIKQGEKHSA	3.38	1	8	3.44	3.7	4.116	51.449	0.8392	Medium	3.51	3.64	4.002	50.025	0.8665	Medium	3.44	3.7	4.087	51.086	0.8888	Medium	3.59	3.66	4.125	51.562	0.8077	Medium	3.44	3.7	4.026	50.319	0.8737	Medium	3.44	3.7	4.076	50.956	0.8833	Medium	3.44	3.7	4.09	51.124	0.8238	Medium	3.45
p101 peptides
							3s						3s						3s						30s						30s						30s						300s						300s
State	Start	End	Sequence	Search RT	Charge	Max D	Start RT	End RT	#D	%D	Score	Conf	Start RT	End RT	#D	%D	Score	Conf	Start RT	End RT	#D	%D	Score	Conf	Start RT	End RT	#D	%D	Score	Conf	Start RT	End RT	#D	%D	Score	Conf	Start RT	End RT	#D	%D	Score	Conf	Start RT	End RT	#D	%D	Score	Conf	Start RT
APO	11	18	DRIQHALE	6.49	2	6	6.45	6.52	2.939	48.987	0.8187	Medium	6.51	6.57	2.966	49.436	0.8079	Medium	6.47	6.6	3.075	51.244	0.8075	Medium	6.47	6.61	3.635	60.578	0.8272	Medium	6.47	6.6	3.602	60.03	0.8154	Medium	6.47	6.6	3.585	59.747	0.8362	Medium	6.47	6.6	3.875	64.585	0.7828	Medium	6.47
APO	11	26	DRIQHALERCLHGLSL	11.9	4	14	12.3	12.49	7.052	50.374	0.8604	Medium	12.3	12.48	6.976	49.826	0.8422	Medium	12.3	12.49	6.906	49.329	0.8381	Medium	12.3	12.49	8.216	58.684	0.8999	Medium	12.3	12.48	8.083	57.737	0.9018	Medium	12.3	12.48	8.554	61.101	0.8447	Medium	12.3	12.49	9.104	65.032	0.8712	Medium	12.3
APO	19	26	RCLHGLSL	8.78	2	6	9.09	9.19	2.727	45.442	0.8246	Medium	9.08	9.19	2.735	45.584	0.8156	Medium	9.09	9.2	2.657	44.28	0.783	Medium	9.09	9.2	3.048	50.8	0.8409	Medium	9.09	9.2	3.005	50.087	0.8085	Medium	9.09	9.19	2.991	49.847	0.8498	Medium	9.09	9.2	3.058	50.963	0.8151	Medium	9.09
APO	27	37	SRRSTSWSAGL	8.94	2	9	9.17	9.2	4.782	53.129	0.7829	Medium	9.17	9.2	4.885	54.273	0.8345	Medium	9.17	9.21	4.798	53.314	0.8306	Medium	9.17	9.2	5.167	57.412	0.8152	Medium	9.17	9.2	5.139	57.099	0.8397	Medium	9.17	9.21	5.065	56.281	0.8233	Medium	9.17	9.21	5.147	57.185	0.8194	Medium	9.11
APO	42	47	WSLQEL	13.14	1	4	13.44	13.51	1.436	35.905	0.8901	Medium	13.48	13.55	1.435	35.886	0.8688	Medium	13.41	13.57	1.493	37.334	0.8738	Medium	13.41	13.57	2.467	61.663	0.8335	Medium	13.41	13.57	2.484	62.097	0.83	Medium	13.41	13.57	2.523	63.07	0.899	Medium	13.41	13.57	2.929	73.231	0.8592	Medium	13.41
APO	47	55	LVSRDPGHF	6.82	1	6	6.91	7.11	1.826	30.43	0.6813	Medium	6.9	7.1	1.828	30.474	0.7052	Medium	6.91	7.11	1.693	28.214	0.6032	Medium	6.91	7.11	2.372	39.541	0.654	Medium	6.9	7.11	2.411	40.187	0.6184	Medium	6.9	7.1	2.364	39.395	0.6484	Medium	6.91	7.11	2.829	47.155	0.5709	Medium	6.91
APO	48	55	VSRDPGHF	5.94	1	5	6.14	6.38	1.128	22.562	0.8647	Medium	6.13	6.37	1.258	25.163	0.8638	Medium	6.13	6.38	1.225	24.492	0.8333	Medium	6.14	6.38	1.73	34.602	0.8478	Medium	6.13	6.38	1.684	33.673	0.8407	Medium	6.13	6.37	1.76	35.193	0.8437	Medium	6.13	6.38	2.043	40.868	0.8231	Medium	6.13
APO	56	68	LILLEQILQKTRE	13.04	3	11	13.25	13.4	0.149	1.358	0.8712	Medium	13.25	13.39	0.118	1.07	0.8989	Medium	13.25	13.39	0.155	1.408	0.8979	Medium	13.25	13.4	0.17	1.548	0.8854	Medium	13.25	13.39	0.174	1.579	0.8815	Medium	13.25	13.39	0.222	2.019	0.8872	Medium	13.25	13.39	0.593	5.391	0.8672	Medium	13.25
APO	59	68	LEQILQKTRE	6.84	3	8	7.09	7.35	0.19	2.372	0.9399	High	7.09	7.34	0.217	2.713	0.929	High	7.09	7.34	0.201	2.517	0.9411	High	7.09	7.34	0.274	3.423	0.9375	High	7.09	7.34	0.223	2.786	0.9377	High	7.09	7.34	0.299	3.739	0.9116	High	7.09	7.34	0.593	7.407	0.9309	High	7.09
APO	59	78	LEQILQKTREVQEKGTYDLL	10.44	2	18	10.44	10.51	1.242	6.901	0.8116	Medium	10.44	10.51	1.493	8.297	0.8517	Medium	10.44	10.52	1.663	9.238	0.7785	Medium	10.44	10.51	3.339	18.55	0.8077	Medium	10.44	10.51	3.336	18.534	0.8151	Medium	10.44	10.52	3.295	18.307	0.7966	Medium	10.44	10.51	5.857	32.538	0.7598	Medium	10.44
APO	59	83	LEQILQKTREVQEKGTYDLLAPLAL	12.31	4	22	12.65	12.69	1.587	7.214	0.8204	Medium	12.64	12.68	1.664	7.563	0.837	Medium	12.65	12.69	1.577	7.167	0.8119	Medium	12.65	12.69	3.855	17.523	0.7941	Medium	12.64	12.69	3.671	16.685	0.7943	Medium	12.64	12.68	3.844	17.474	0.806	Medium	12.65	12.69	6.793	30.876	0.7739	Medium	12.65
APO	59	84	LEQILQKTREVQEKGTYDLLAPLALL	13.97	4	23	13.93	13.97	1.416	6.157	0.7963	Medium	13.93	13.97	1.499	6.518	0.7678	Medium	13.93	13.97	1.449	6.302	0.7158	Medium	13.93	13.98	3.806	16.549	0.7305	Medium	13.93	13.97	3.688	16.037	0.6837	Medium	13.93	13.97	3.792	16.488	0.7245	Medium	14.01	14.08	6.822	29.661	0.7062	Medium	13.93
APO	69	78	VQEKGTYDLL	10.41	1	8	10.56	10.67	1.282	16.028	0.8535	Medium	10.55	10.66	1.2	14.995	0.8145	Medium	10.56	10.67	1.04	13.006	0.7702	Medium	10.56	10.67	2.767	34.588	0.8218	Medium	10.55	10.66	2.706	33.828	0.7834	Medium	10.56	10.66	2.808	35.095	0.8411	Medium	10.56	10.67	4.121	51.511	0.7182	Medium	10.56
APO	69	83	VQEKGTYDLLAPLAL	13.35	2	12	13.56	13.84	1.115	9.29	0.8713	Medium	13.56	13.84	1.085	9.045	0.8562	Medium	13.56	13.85	1.176	9.799	0.8448	Medium	13.56	13.85	2.423	20.191	0.8469	Medium	13.56	13.84	2.375	19.794	0.8442	Medium	13.56	13.84	2.448	20.397	0.8564	Medium	13.56	13.85	3.991	33.255	0.8319	Medium	13.56
APO	69	84	VQEKGTYDLLAPLALL	14.23	2	13	14.33	14.53	0.865	6.657	0.8808	Medium	14.33	14.53	0.961	7.393	0.8812	Medium	14.33	14.54	0.904	6.951	0.8792	Medium	14.34	14.53	2.072	15.935	0.8747	Medium	14.33	14.53	2.07	15.925	0.8773	Medium	14.33	14.53	2.082	16.017	0.8689	Medium	14.33	14.54	3.435	26.426	0.8547	Medium	14.33
APO	84	90	LFYSTVL	12.93	1	5	13.21	13.4	0.11	2.205	0.9055	Medium	13.2	13.4	0.087	1.737	0.899	Medium	13.21	13.4	0.098	1.969	0.9019	Medium	13.21	13.4	0.075	1.496	0.9073	Medium	13.21	13.4	0.075	1.497	0.9014	Medium	13.2	13.4	0.095	1.905	0.9015	Medium	13.21	13.4	0.105	2.092	0.8883	Medium	13.21
APO	85	90	FYSTVL	11.25	1	4	11.59	11.69	0.055	1.379	0.7911	Medium	11.59	11.69	0.06	1.494	0.8102	Medium	11.59	11.69	0.083	2.071	0.8346	Medium	11.59	11.69	0.087	2.181	0.8282	Medium	11.59	11.69	0.144	3.607	0.8263	Medium	11.58	11.69	0.142	3.543	0.8292	Medium	11.59	11.69	0.112	2.798	0.8261	Medium	11.59
APO	91	101	CTPHFPPDSDL	9.64	2	6	9.87	10.09	1.267	21.114	0.92	Medium	9.86	10.09	1.307	21.791	0.911	Medium	9.87	10.1	1.289	21.49	0.9018	Medium	9.87	10.09	2.185	36.424	0.9031	Medium	9.87	10.09	2.046	34.092	0.9049	Medium	9.87	10.1	2.171	36.185	0.907	Medium	9.87	10.09	2.751	45.854	0.898	Medium	9.87
APO	91	102	CTPHFPPDSDLL	11.04	2	7	11.09	11.47	1.133	16.188	0.8395	Medium	11.08	11.47	1.169	16.699	0.8107	Medium	11.09	11.47	1.143	16.327	0.7737	Medium	11.09	11.47	2.217	31.673	0.7832	Medium	11.08	11.47	2.11	30.14	0.7402	Medium	11.09	11.48	2.249	32.133	0.7996	Medium	11.08	11.47	3.261	46.593	0.7239	Medium	11.09
APO	91	103	CTPHFPPDSDLLL	12.52	2	8	12.43	12.49	1.154	14.421	0.7979	Medium	12.42	12.48	1.144	14.303	0.747	Medium	12.43	12.49	1.154	14.42	0.6152	Medium	12.43	12.49	2.172	27.148	0.738	Medium	12.43	12.48	2.04	25.499	0.6475	Medium	12.42	12.48	2.075	25.941	0.7505	Medium	12.52	12.59	3.455	43.183	0.7472	Medium	12.43
APO	124	128	QELLT	8.23	1	3	8.48	8.57	0.334	11.132	0.6458	Medium	8.48	8.57	0.338	11.258	0.6366	Medium	8.48	8.58	0.375	12.516	0.5721	Medium	8.48	8.55	0.854	28.459	0.5366	Medium	8.53	8.6	0.852	28.39	0.6071	Medium	8.48	8.58	0.797	26.577	0.5159	Medium	8.48	8.58	1.048	34.917	0.5793	Medium	8.48
APO	127	132	LTFIDA	11.67	1	4	11.65	11.69	0.065	1.626	0.6972	Medium	11.64	11.69	0.101	2.537	0.6965	Medium	11.65	11.69	0.14	3.488	0.5922	Medium	11.65	11.69	0.157	3.915	0.6608	Medium	11.65	11.69	0.103	2.586	0.6524	Medium	11.64	11.69	0.159	3.963	0.6524	Medium	11.65	11.69	0.244	6.088	0.6206	Medium	11.65
APO	129	164	FIDAELKAPGISYQRLVRAEQGLSTRSHRSSTVTVL	10.51	5	33	10.65	10.76	1.512	4.58	0.7736	Medium	10.65	10.75	1.615	4.895	0.7711	Medium	10.65	10.76	1.605	4.863	0.6892	Medium	10.65	10.76	1.995	6.045	0.7498	Medium	10.65	10.76	1.593	4.827	0.7173	Medium	10.64	10.76	2.026	6.14	0.7348	Medium	10.65	10.76	2.29	6.939	0.7377	Medium	10.65
APO	134	144	LKAPGISYQRL	8.83	3	8	9	9.06	0.311	3.893	0.7891	Medium	9.01	9.07	0.287	3.588	0.7695	Medium	9	9.06	0.304	3.804	0.7568	Medium	9	9.06	0.346	4.323	0.8181	Medium	9	9.06	0.326	4.078	0.7998	Medium	9.01	9.07	0.392	4.905	0.8142	Medium	9	9.06	0.367	4.587	0.7804	Medium	9
APO	145	162	VRAEQGLSTRSHRSSTVT	4.34	4	16	4.58	4.65	2.549	15.929	0.8781	Medium	4.58	4.67	2.576	16.102	0.874	Medium	4.59	4.67	2.695	16.844	0.8346	Medium	4.59	4.67	2.636	16.476	0.8651	Medium	4.59	4.67	2.751	17.195	0.8325	Medium	4.59	4.67	3.025	18.905	0.8379	Medium	4.59	4.67	3.443	21.52	0.8437	Medium	4.59
APO	145	164	VRAEQGLSTRSHRSSTVTVL	6.57	2	18	6.98	7.09	1.678	9.32	0.8868	Medium	6.97	7.09	1.796	9.976	0.9029	Medium	6.97	7.09	1.661	9.229	0.9103	Medium	6.98	7.09	1.799	9.994	0.8987	Medium	6.97	7.09	1.993	11.072	0.9133	Medium	6.97	7.09	1.943	10.795	0.8831	Medium	6.97	7.09	2.196	12.201	0.8715	Medium	6.97
APO	165	172	LLNPVEVQ	9.53	1	5	9.46	9.67	1.792	35.837	0.9104	Medium	9.59	9.65	1.877	37.537	0.901	Medium	9.46	9.67	1.897	37.932	0.9109	Medium	9.46	9.67	3.81	76.206	0.9139	Medium	9.46	9.67	3.755	75.097	0.9046	Medium	9.46	9.67	3.783	75.665	0.9091	Medium	9.46	9.67	4.214	84.277	0.8884	Medium	9.46
APO	165	175	LLNPVEVQAEF	12.36	1	8	12.54	12.82	3.451	43.132	0.8724	Medium	12.63	12.71	3.576	44.704	0.9004	Medium	12.54	12.82	3.521	44.016	0.8673	Medium	12.54	12.82	5.864	73.306	0.8616	Medium	12.53	12.81	5.913	73.91	0.8654	Medium	12.53	12.81	5.889	73.61	0.8497	Medium	12.65	12.73	6.712	83.9	0.8776	Medium	12.59
APO	171	175	VQAEF	8.93	1	3	9.25	9.35	1.717	57.239	0.7451	Medium	9.26	9.35	1.74	58.003	0.757	Medium	9.26	9.36	1.715	57.161	0.7541	Medium	9.25	9.35	2.106	70.214	0.7469	Medium	9.25	9.35	2.111	70.36	0.7533	Medium	9.26	9.36	2.092	69.721	0.7558	Medium	9.26	9.36	2.41	80.331	0.7583	Medium	9.26
APO	176	193	LDVADKLSTPGPSPHSAY	8.3	2	13	8.49	8.85	3.134	24.11	0.9335	High	8.49	8.85	3.218	24.756	0.9316	High	8.49	8.85	3.15	24.232	0.9309	High	8.49	8.85	4.675	35.96	0.9421	High	8.49	8.85	4.657	35.823	0.9403	High	8.49	8.86	4.525	34.811	0.8941	High	8.49	8.85	6.478	49.834	0.9213	High	8.49
APO	177	193	DVADKLSTPGPSPHSAY	7.86	3	12	7.85	7.95	3.155	26.291	0.8125	Medium	7.85	7.95	3.152	26.27	0.8164	Medium	7.85	7.96	3.193	26.608	0.7997	Medium	7.85	7.95	4.809	40.074	0.8142	Medium	7.85	7.95	4.873	40.608	0.7783	Medium	7.85	7.95	4.84	40.337	0.8211	Medium	7.85	7.95	6.783	56.521	0.7967	Medium	7.85
APO	194	198	ITLLL	14.02	1	3	13.74	13.98	0.04	1.318	0.9458	Medium	13.73	13.98	0.047	1.551	0.957	Medium	13.74	13.98	0.057	1.891	0.9626	Medium	13.74	13.98	0.057	1.916	0.959	Medium	13.73	13.98	0.054	1.804	0.9509	Medium	13.73	13.98	0.063	2.117	0.9602	Medium	13.74	13.98	0.076	2.529	0.9406	Medium	13.74
APO	197	209	LLHAFQATFGAHC	10.42	3	11	10.74	10.8	1.179	10.715	0.813	Medium	10.74	10.8	1.282	11.656	0.8256	Medium	10.74	10.8	1.254	11.401	0.8376	Medium	10.74	10.8	1.409	12.812	0.841	Medium	10.74	10.8	1.446	13.15	0.8442	Medium	10.74	10.8	1.409	12.813	0.8321	Medium	10.74	10.8	1.665	15.14	0.8154	Medium	10.74
APO	215	226	HRRLQSKTLAEL	6.57	4	10	6.93	7.07	1.921	19.207	0.7885	Medium	6.92	7.06	1.961	19.606	0.8105	Medium	6.92	7.07	1.935	19.354	0.808	Medium	6.93	7.07	2.37	23.695	0.8161	Medium	6.92	7.06	2.352	23.524	0.8239	Medium	6.92	7.06	2.29	22.9	0.7905	Medium	6.92	7.07	3.368	33.679	0.7971	Medium	6.92
APO	230	235	FTETAE	6.27	1	4	6.16	6.25	0.133	3.318	0.5895	Medium	6.16	6.24	0.115	2.878	0.5729	Medium	6.16	6.24	0.157	3.928	0.4772	Medium	6.16	6.25	0.174	4.355	0.5911	Medium	6.17	6.24	0.186	4.658	0.4841	Medium	6.15	6.24	0.187	4.675	0.5654	Medium	6.23	6.29	0.183	4.57	0.5645	Medium	6.16
APO	231	238	TETAEAQE	4.24	1	6	4.46	4.62	0.274	4.562	0.8568	Medium	4.46	4.61	0.167	2.781	0.8492	Medium	4.46	4.61	0.201	3.348	0.8019	Medium	4.46	4.62	0.265	4.419	0.838	Medium	4.46	4.61	0.214	3.571	0.8465	Medium	4.46	4.61	0.335	5.579	0.826	Medium	4.46	4.61	0.355	5.922	0.7808	Medium	4.46
APO	239	248	LASGIGDAAE	7.32	1	8	7.55	7.72	2.394	29.93	0.7509	Medium	7.55	7.72	2.481	31.009	0.7715	Medium	7.55	7.72	2.504	31.303	0.7124	Medium	7.55	7.72	3.187	39.833	0.7575	Medium	7.55	7.72	3.262	40.771	0.7444	Medium	7.55	7.72	3.204	40.051	0.7297	Medium	7.55	7.72	4.271	53.391	0.6747	Medium	7.55
APO	239	257	LASGIGDAAEARQWLRTKL	11.14	3	17	11.19	11.34	2.052	12.07	0.7393	Medium	11.19	11.33	1.991	11.711	0.7102	Medium	11.2	11.34	2.076	12.214	0.6678	Medium	11.19	11.34	3.001	17.651	0.7367	Medium	11.19	11.33	2.942	17.306	0.6831	Medium	11.2	11.33	3.078	18.105	0.7387	Medium	11.19	11.34	4.948	29.108	0.6524	Medium	11.2
APO	240	257	ASGIGDAAEARQWLRTKL	10.78	3	16	11.02	11.09	2.091	13.071	0.7509	Medium	11.01	11.08	2.215	13.841	0.7502	Medium	11.02	11.09	1.999	12.495	0.71	Medium	11.02	11.09	2.968	18.547	0.7242	Medium	11.02	11.08	3.028	18.927	0.7099	Medium	11.02	11.09	2.972	18.572	0.7344	Medium	11.02	11.08	4.993	31.209	0.6897	Medium	11.02
APO	249	257	ARQWLRTKL	8.57	3	7	8.53	8.62	0.1	1.426	0.906	Medium	8.53	8.61	0.103	1.466	0.9183	Medium	8.53	8.62	0.097	1.381	0.9238	Medium	8.53	8.62	0.157	2.24	0.9221	Medium	8.53	8.62	0.155	2.212	0.9027	Medium	8.53	8.62	0.147	2.094	0.9225	Medium	8.53	8.62	0.427	6.102	0.9044	Medium	8.53
APO	252	257	WLRTKL	8.4	2	4	8.67	8.9	0.065	1.621	0.9229	Medium	8.66	8.91	0.075	1.864	0.9117	Medium	8.67	8.9	0.074	1.838	0.9106	Medium	8.67	8.9	0.096	2.396	0.8888	Medium	8.67	8.9	0.086	2.138	0.9074	Medium	8.66	8.91	0.106	2.644	0.9227	Medium	8.67	8.9	0.16	3.995	0.9026	Medium	8.67
APO	258	270	QAVGEKAGFPGVL	10.53	2	10	10.78	10.87	1.672	16.723	0.8632	Medium	10.78	10.86	1.74	17.402	0.8569	Medium	10.78	10.87	1.803	18.032	0.8528	Medium	10.78	10.87	3.505	35.048	0.8629	Medium	10.78	10.87	3.42	34.197	0.8469	Medium	10.78	10.87	3.541	35.41	0.8579	Medium	10.78	10.87	4.918	49.182	0.8337	Medium	10.78
APO	271	288	DTAKPGKLRTIPIPVARC	7.95	2	13	8.37	8.46	4.666	35.896	0.8434	Medium	8.37	8.46	4.814	37.027	0.8645	Medium	8.38	8.47	4.764	36.644	0.864	Medium	8.37	8.46	7.004	53.881	0.868	Medium	8.37	8.47	6.9	53.076	0.8824	Medium	8.37	8.46	7.021	54.006	0.8618	Medium	8.37	8.47	8.152	62.706	0.8615	Medium	8.37
APO	279	288	RTIPIPVARC	7.96	2	6	8.09	8.18	1.124	18.733	0.9241	Medium	8.09	8.18	1.22	20.337	0.9311	Medium	8.09	8.18	1.254	20.895	0.9198	Medium	8.09	8.18	3	50.003	0.9257	Medium	8.09	8.18	2.948	49.126	0.9256	Medium	8.09	8.18	3.042	50.692	0.9181	Medium	8.09	8.18	3.994	66.568	0.9248	Medium	8.09
APO	289	298	YTYSWNQDSF	12.31	1	8	12.5	12.62	3.934	49.18	0.9223	Medium	12.49	12.62	3.949	49.367	0.8985	Medium	12.5	12.62	3.986	49.822	0.8662	Medium	12.5	12.62	4.323	54.034	0.9263	Medium	12.49	12.62	4.256	53.199	0.8977	Medium	12.49	12.62	4.321	54.012	0.9201	Medium	12.49	12.62	4.836	60.451	0.8907	Medium	12.5
APO	291	298	YSWNQDSF	11.77	1	6	12.03	12.12	3.388	56.471	0.9495	Medium	12.02	12.11	3.395	56.589	0.9427	Medium	12.03	12.12	3.346	55.759	0.9341	Medium	12.03	12.12	3.665	61.079	0.939	Medium	12.02	12.12	3.603	60.042	0.9342	Medium	12.02	12.11	3.667	61.123	0.9476	Medium	12.02	12.12	4.131	68.846	0.9333	Medium	12.03
APO	304	317	ILLKEQELLQPEIL	12.36	2	11	12.57	12.73	5.748	52.259	0.8967	Medium	12.57	12.73	5.899	53.624	0.9002	Medium	12.57	12.73	5.849	53.176	0.8813	Medium	12.57	12.73	7.812	71.018	0.898	Medium	12.57	12.73	7.741	70.37	0.8826	Medium	12.57	12.73	7.829	71.173	0.8884	Medium	12.57	12.73	8.314	75.579	0.8774	Medium	12.57
APO	304	319	ILLKEQELLQPEILDD	11.98	2	13	12.03	12.19	6.222	47.859	0.736	Medium	12.03	12.19	6.127	47.133	0.8104	Medium	12.03	12.19	6.499	49.99	0.6489	Medium	12.03	12.19	8.28	63.691	0.7965	Medium	12.03	12.19	8.114	62.412	0.7829	Medium	12.03	12.19	8.167	62.825	0.7414	Medium	12.03	12.19	8.739	67.223	0.7348	Medium	12.03
APO	306	317	LKEQELLQPEIL	11.51	2	9	11.89	12	5.321	59.122	0.9153	High	11.89	12	5.436	60.404	0.9189	High	11.89	12	5.358	59.53	0.9215	High	11.89	12	6.792	75.472	0.9138	High	11.89	12	6.763	75.139	0.914	High	11.89	12	6.765	75.172	0.8855	High	11.89	12	6.843	76.031	0.9037	High	11.89
APO	306	321	LKEQELLQPEILDDEE	11.21	2	13	11.41	11.48	5.954	45.802	0.7651	Medium	11.48	11.54	6.196	47.664	0.802	Medium	11.42	11.51	5.805	44.651	0.6601	Medium	11.42	11.51	7.567	58.207	0.7627	Medium	11.47	11.54	7.51	57.77	0.7906	Medium	11.43	11.51	7.218	55.524	0.7192	Medium	11.42	11.5	7.63	58.689	0.6809	Medium	11.42
APO	307	317	KEQELLQPEIL	11.25	2	8	11.4	11.48	4.76	59.494	0.8506	Medium	11.46	11.55	4.835	60.435	0.8578	Medium	11.46	11.56	4.766	59.572	0.868	Medium	11.46	11.56	5.964	74.552	0.8569	Medium	11.46	11.55	5.91	73.869	0.8535	Medium	11.47	11.56	5.89	73.628	0.8518	Medium	11.46	11.55	5.963	74.539	0.8536	Medium	11.46
APO	309	317	QELLQPEIL	12.27	1	6	12.61	12.68	3.604	60.069	0.6769	Medium	12.57	12.67	3.614	60.232	0.6657	Medium	12.57	12.67	3.585	59.756	0.6284	Medium	12.57	12.67	4.208	70.127	0.7193	Medium	12.57	12.67	4.293	71.553	0.6965	Medium	12.57	12.67	4.289	71.48	0.7227	Medium	12.63	12.7	4.311	71.858	0.698	Medium	12.57
APO	311	317	LLQPEIL	11.83	1	4	12.07	12.21	3.019	75.47	0.9035	Medium	12.06	12.21	3.051	76.273	0.9264	Medium	12.07	12.21	3.049	76.22	0.9251	Medium	12.07	12.21	3.249	81.213	0.9322	Medium	12.06	12.21	3.215	80.379	0.9383	Medium	12.06	12.21	3.262	81.542	0.9395	Medium	12.07	12.21	3.268	81.69	0.9277	Medium	12.07
APO	327	332	DEEEDL	8.27	1	4	8.15	8.32	2.208	55.191	0.7368	Medium	8.15	8.32	2.24	55.99	0.7385	Medium	8.16	8.32	2.142	53.541	0.7049	Medium	8.15	8.32	2.246	56.145	0.7581	Medium	8.15	8.32	2.238	55.952	0.7278	Medium	8.15	8.32	2.229	55.728	0.7493	Medium	8.16	8.32	2.352	58.8	0.7006	Medium	8.16
APO	328	332	EEEDL	7.27	1	3	7.57	7.66	1.5	50.01	0.8837	Medium	7.57	7.66	1.51	50.341	0.8854	Medium	7.58	7.66	1.468	48.936	0.878	Medium	7.57	7.66	1.538	51.274	0.8845	Medium	7.58	7.66	1.565	52.161	0.8819	Medium	7.57	7.66	1.576	52.543	0.8796	Medium	7.58	7.66	1.564	52.147	0.8726	Medium	7.58
APO	333	345	DADGHCAERDSVL	7.48	2	11	7.73	7.83	4.924	44.761	0.9127	Medium	7.73	7.83	4.921	44.736	0.8922	Medium	7.74	7.83	4.896	44.51	0.8904	Medium	7.73	7.83	5.008	45.523	0.8965	Medium	7.73	7.83	5.016	45.599	0.8887	Medium	7.73	7.82	4.978	45.257	0.9056	Medium	7.74	7.83	5.049	45.903	0.8868	Medium	7.74
APO	346	356	STGSAASHAST	3.6	2	9	3.74	3.96	5.893	65.476	0.9168	High	3.74	3.96	6.001	66.681	0.9395	High	3.74	3.96	6.039	67.1	0.9344	Medium	3.74	3.96	5.986	66.508	0.9223	High	3.74	3.96	5.875	65.278	0.9306	High	3.74	3.96	6.064	67.373	0.9276	Medium	3.74	3.96	6.095	67.721	0.8962	Medium	3.74
APO	346	359	STGSAASHASTLSL	8.77	2	12	9	9.19	6.99	58.254	0.8448	Medium	9.01	9.18	7.093	59.106	0.8417	Medium	9	9.19	6.983	58.195	0.8337	Medium	9	9.19	7.193	59.944	0.8398	Medium	9	9.19	7.048	58.737	0.833	Medium	9.01	9.18	7.084	59.037	0.8426	Medium	9	9.19	7.034	58.615	0.8344	Medium	9
APO	346	377	STGSAASHASTLSLASSQASGPTLSRQLLTSF	11.94	3	29	12.07	12.16	16.456	56.746	0.8473	Medium	12.06	12.16	16.394	56.53	0.8134	Medium	12.07	12.16	16.081	55.452	0.7436	Medium	12.07	12.16	16.466	56.78	0.8115	Medium	12.06	12.16	16.264	56.083	0.8215	Medium	12.06	12.16	16.259	56.066	0.7885	Medium	12.07	12.16	16.776	57.848	0.783	Medium	12.07
APO	358	374	SLASSQASGPTLSRQLL	10.18	2	14	10.44	10.56	10.149	72.494	0.7833	Medium	10.44	10.55	10.282	73.444	0.7634	Medium	10.44	10.56	9.961	71.148	0.7198	Medium	10.44	10.56	10.311	73.65	0.7494	Medium	10.44	10.55	10.072	71.946	0.7418	Medium	10.44	10.56	10.123	72.308	0.7608	Medium	10.44	10.56	10.157	72.547	0.7121	Medium	10.44
APO	360	369	ASSQASGPTL	7.65	1	7	7.98	8.19	5.156	73.654	0.8839	Medium	7.98	8.19	5.219	74.562	0.8935	Medium	7.99	8.19	5.158	73.692	0.8902	Medium	7.99	8.19	5.26	75.136	0.9023	Medium	7.99	8.19	5.214	74.481	0.8957	Medium	7.98	8.19	5.261	75.158	0.8928	Medium	7.99	8.19	5.409	77.266	0.8913	Medium	7.99
APO	360	374	ASSQASGPTLSRQLL	9.9	2	12	10.01	10.19	8.596	71.636	0.7514	Medium	10.01	10.19	8.44	70.334	0.7764	Medium	10.01	10.2	8.437	70.307	0.7947	Medium	10.01	10.19	8.667	72.225	0.788	Medium	10.01	10.19	8.478	70.653	0.8009	Medium	10.02	10.2	8.676	72.296	0.7775	Medium	10.01	10.2	8.563	71.357	0.8048	Medium	10.01
APO	360	377	ASSQASGPTLSRQLLTSF	11.99	2	15	11.98	12.49	9.863	65.752	0.9019	Medium	11.98	12.48	9.739	64.926	0.8988	Medium	11.98	12.49	9.621	64.141	0.8857	Medium	11.98	12.49	9.784	65.23	0.9124	High	11.98	12.48	9.647	64.315	0.9104	High	11.98	12.48	9.756	65.038	0.8878	Medium	11.98	12.49	9.876	65.839	0.8998	Medium	11.98
APO	370	377	SRQLLTSF	10.57	1	6	10.79	10.86	4.868	81.13	0.7104	Medium	10.79	10.95	4.739	78.977	0.7691	Medium	10.79	10.95	4.78	79.673	0.7452	Medium	10.79	10.95	4.817	80.283	0.7878	Medium	10.79	10.95	4.786	79.76	0.7805	Medium	10.8	10.95	4.839	80.653	0.8018	Medium	10.79	10.95	4.81	80.165	0.7552	Medium	10.79
APO	377	392	FVSGLSDGVDSGYMED	10.85	1	14	10.94	11.35	8.126	58.046	0.8673	Medium	10.94	11.35	7.954	56.817	0.8731	Medium	10.94	11.35	7.928	56.629	0.8605	Medium	10.94	11.35	8.213	58.661	0.845	Medium	10.94	11.35	8.007	57.196	0.8666	Medium	10.94	11.36	8.029	57.351	0.8245	Medium	10.94	11.35	8.202	58.586	0.8419	Medium	10.94
APO	378	392	VSGLSDGVDSGYMED	9.75	1	13	9.93	10.19	6.987	53.75	0.8832	Medium	9.93	10.19	6.979	53.683	0.8733	Medium	9.94	10.2	6.834	52.566	0.8602	Medium	9.93	10.19	7.124	54.803	0.8707	Medium	9.93	10.19	6.931	53.316	0.8691	Medium	9.94	10.2	7.054	54.258	0.8564	Medium	9.93	10.2	7.015	53.961	0.8602	Medium	9.94
APO	393	397	IEESA	4.87	1	3	4.94	5	2.094	69.816	0.9386	High	4.86	5.07	2.156	71.861	0.9329	High	4.87	5.08	2.157	71.912	0.9412	High	4.87	5.08	2.134	71.137	0.9505	High	4.86	5.07	2.133	71.094	0.9362	High	4.86	5.07	2.16	71.991	0.9412	High	4.87	5.08	2.181	72.709	0.9456	High	4.86
APO	426	432	FKSTSQM	5.83	1	5	6.05	6.28	3.476	69.516	0.9168	Medium	6.05	6.27	3.519	70.372	0.9123	Medium	6.05	6.28	3.502	70.046	0.8896	Medium	6.05	6.28	3.537	70.743	0.9074	Medium	6.05	6.27	3.52	70.392	0.8917	Medium	6.05	6.27	3.549	70.981	0.9034	Medium	6.05	6.28	3.597	71.942	0.9005	Medium	6.05
APO	433	457	VLRRDSRSLEGSPDSGPPLRRAGSL	6.9	4	20	7.17	7.38	11.368	56.842	0.8647	Medium	7.16	7.37	11.519	57.593	0.8751	Medium	7.17	7.38	11.401	57.007	0.8535	Medium	7.17	7.37	11.583	57.916	0.8749	Medium	7.16	7.37	11.546	57.732	0.8568	Medium	7.16	7.37	11.61	58.052	0.8621	Medium	7.17	7.38	11.597	57.987	0.8373	Medium	7.17
APO	435	457	RRDSRSLEGSPDSGPPLRRAGSL	6.65	5	18	6.83	7.15	10.487	58.263	0.8309	Medium	6.82	7.15	10.395	57.749	0.8206	Medium	6.82	7.15	10.378	57.653	0.8393	Medium	6.83	7.15	10.597	58.875	0.8378	Medium	6.82	7.15	10.424	57.909	0.8343	Medium	6.82	7.15	10.515	58.418	0.8444	Medium	6.82	7.15	10.689	59.381	0.7986	Medium	6.82
APO	491	515	LAPASRHQRRRPFLSGDEDPKASTL	6.95	5	20	7.09	7.26	6.483	32.416	0.8545	Medium	7.09	7.26	6.462	32.311	0.8617	Medium	7.09	7.27	6.232	31.161	0.8603	Medium	7.09	7.26	6.875	34.374	0.8771	Medium	7.09	7.27	6.573	32.867	0.8643	Medium	7.09	7.26	6.753	33.764	0.8691	Medium	7.09	7.27	7.15	35.748	0.8668	Medium	7.09
APO	507	515	DEDPKASTL	6.48	1	6	6.68	6.74	2.403	40.05	0.688	Medium	6.68	6.73	2.545	42.412	0.6439	Medium	6.68	6.74	2.615	43.58	0.5157	Medium	6.73	6.8	2.606	43.428	0.7228	Medium	6.68	6.74	2.635	43.911	0.5758	Medium	6.68	6.73	2.724	45.399	0.6846	Medium	6.7	6.78	2.818	46.966	0.6694	Medium	6.68
APO	537	546	RRLENNRPLL	6.89	3	7	7.11	7.4	2.135	30.5	0.9292	High	7.1	7.39	2.262	32.308	0.9339	High	7.11	7.39	2.25	32.149	0.9387	Medium	7.11	7.39	3.997	57.104	0.9414	High	7.11	7.39	3.93	56.136	0.9373	Medium	7.1	7.39	4.039	57.704	0.9305	High	7.11	7.39	4.638	66.256	0.9356	Medium	7.11
APO	537	549	RRLENNRPLLTRF	8.55	4	10	8.62	8.74	2.363	23.634	0.8779	Medium	8.62	8.75	2.456	24.555	0.879	Medium	8.63	8.74	2.398	23.982	0.8792	Medium	8.62	8.74	5.054	50.543	0.8691	Medium	8.62	8.74	5.026	50.26	0.8578	Medium	8.63	8.75	5.091	50.908	0.8791	Medium	8.63	8.74	6.221	62.207	0.8908	Medium	8.63
APO	550	554	FKLQF	11.52	1	3	11.82	12.01	0.297	9.909	0.8636	Medium	11.82	12	0.288	9.61	0.8367	Medium	11.82	12.01	0.284	9.453	0.7935	Medium	11.82	12.01	0.878	29.271	0.8332	Medium	11.82	12.01	0.864	28.816	0.8065	Medium	11.82	12	0.882	29.405	0.8242	Medium	11.82	12.01	1.243	41.426	0.8352	Medium	11.83
APO	555	593	FYVPVKRSRGTGTPTSPAPRSQTPPLPTDAPRHPGPAEL	7.76	4	27	7.8	7.85	12.303	45.566	0.882	High	7.8	7.85	12.334	45.681	0.8738	Medium	7.8	7.85	12.191	45.152	0.8478	Medium	7.8	7.85	12.818	47.472	0.8669	High	7.8	7.85	12.775	47.316	0.8287	Medium	7.8	7.85	12.756	47.243	0.8627	Medium	7.8	7.85	12.996	48.132	0.8717	High	7.8
APO	594	611	GAAPWEESTNDISHYLGM	13.4	2	15	13.62	13.75	6.678	44.522	0.8323	Medium	13.62	13.75	6.978	46.519	0.8333	Medium	13.62	13.76	7.064	47.091	0.8263	Medium	13.62	13.76	8.05	53.664	0.8287	Medium	13.62	13.75	8.115	54.102	0.8245	Medium	13.62	13.75	7.885	52.569	0.8255	Medium	13.62	13.75	9.237	61.583	0.8443	Medium	13.62
APO	594	621	GAAPWEESTNDISHYLGMLDPWYERNVL	14.18	3	24	14.27	14.48	6.989	29.122	0.7371	Medium	14.27	14.48	6.923	28.846	0.7132	Medium	14.28	14.49	6.563	27.345	0.7063	Medium	14.28	14.49	9.314	38.809	0.7559	Medium	14.27	14.48	9.368	39.035	0.6589	Medium	14.27	14.48	9.417	39.239	0.7433	Medium	14.27	14.48	12.067	50.278	0.7209	Medium	14.28
APO	594	623	GAAPWEESTNDISHYLGMLDPWYERNVLGL	14.18	3	26	14.33	14.62	7.054	27.132	0.8149	Medium	14.33	14.62	7.35	28.268	0.8526	Medium	14.33	14.63	7.263	27.936	0.8154	Medium	14.34	14.62	9.767	37.563	0.8384	Medium	14.33	14.62	9.776	37.6	0.8512	Medium	14.33	14.62	9.934	38.209	0.8541	Medium	14.33	14.63	12.81	49.27	0.8217	Medium	14.33
APO	605	611	ISHYLGM	9.58	2	5	9.79	9.88	1.096	21.928	0.8279	Medium	9.86	9.92	1.173	23.459	0.8273	Medium	9.79	9.88	1.196	23.923	0.8038	Medium	9.79	9.88	1.662	33.234	0.8599	Medium	9.79	9.88	1.667	33.334	0.8754	Medium	9.8	9.88	1.654	33.075	0.8745	Medium	9.79	9.88	2.411	48.227	0.8778	Medium	9.79
APO	605	621	ISHYLGMLDPWYERNVL	13.13	3	14	13.31	13.6	2.857	20.404	0.9065	Medium	13.31	13.59	2.971	21.22	0.8946	High	13.31	13.6	2.876	20.543	0.8977	High	13.31	13.6	4.339	30.993	0.8877	High	13.31	13.59	4.498	32.126	0.8367	Medium	13.31	13.59	4.473	31.947	0.8746	High	13.31	13.59	5.989	42.779	0.923	High	13.31
APO	612	623	LDPWYERNVLGL	13.4	2	9	13.69	13.76	2.134	23.707	0.9084	High	13.55	13.78	2.082	23.135	0.8928	Medium	13.55	13.79	2.383	26.474	0.8911	High	13.55	13.79	3.256	36.173	0.9166	High	13.55	13.78	3.39	37.67	0.8609	Medium	13.55	13.78	3.147	34.965	0.8747	Medium	13.55	13.79	4.376	48.624	0.9088	Medium	13.55
APO	622	631	GLMHLPPEVL	11.62	2	6	11.86	12.16	1.943	32.384	0.918	High	11.85	12.16	2.012	33.531	0.9183	High	11.86	12.16	1.966	32.766	0.9094	High	11.86	12.16	3.084	51.4	0.933	High	11.86	12.16	3.059	50.988	0.9215	High	11.85	12.16	3.069	51.147	0.9259	High	11.86	12.16	3.601	60.019	0.9207	High	11.86
APO	624	631	MHLPPEVL	10.56	1	4	10.68	10.99	1.768	44.188	0.8631	Medium	10.68	10.99	1.764	44.104	0.85	Medium	10.68	10.99	1.758	43.956	0.8532	Medium	10.68	10.99	2.694	67.351	0.8569	Medium	10.68	10.99	2.691	67.28	0.8402	Medium	10.68	11	2.702	67.552	0.8707	Medium	10.68	10.99	3.084	77.09	0.8508	Medium	10.68
APO	632	649	CQSLKAEPRPLEGSPAQL	8.6	2	13	8.72	8.99	9.532	73.321	0.9201	High	8.71	9	9.515	73.192	0.9186	High	8.72	9	9.352	71.938	0.9139	High	8.72	8.99	9.757	75.055	0.9231	High	8.72	8.99	9.738	74.911	0.9022	High	8.72	9	9.715	74.728	0.9192	High	8.72	9	9.807	75.441	0.9017	High	8.72
APO	632	652	CQSLKAEPRPLEGSPAQLPIL	10.88	3	15	11.08	11.37	9.465	63.103	0.8967	Medium	11.07	11.37	9.424	62.827	0.9026	Medium	11.08	11.37	9.293	61.952	0.8925	Medium	11.08	11.37	10.15	67.666	0.8976	Medium	11.07	11.37	10.032	66.88	0.9	Medium	11.08	11.37	10.091	67.274	0.8897	Medium	11.08	11.37	10.529	70.192	0.9064	Medium	11.08
APO	636	652	KAEPRPLEGSPAQLPIL	10.72	2	11	11.2	11.4	1.853	16.848	0.887	Medium	11.2	11.4	1.991	18.104	0.8754	Medium	11.2	11.41	1.971	17.916	0.8519	Medium	11.2	11.4	4.21	38.277	0.8587	Medium	11.2	11.4	4.226	38.42	0.8528	Medium	11.21	11.41	4.319	39.262	0.8642	Medium	11.2	11.4	5.319	48.356	0.8607	Medium	11.2
APO	650	654	PILAD	8.12	1	3	8.22	8.42	0.543	18.087	0.7323	Medium	8.22	8.42	0.568	18.933	0.751	Medium	8.31	8.38	0.552	18.396	0.8049	Medium	8.22	8.42	1.092	36.388	0.7424	Medium	8.22	8.42	1.143	38.088	0.7358	Medium	8.22	8.42	1.08	36.012	0.7383	Medium	8.22	8.42	1.719	57.304	0.744	Medium	8.22
APO	653	657	ADMLL	11.56	1	3	12	12.08	0.11	3.668	0.8736	Medium	12	12.07	0.093	3.088	0.8774	High	12	12.08	0.117	3.885	0.8695	High	11.94	12.01	0.204	6.8	0.8849	High	11.96	12.02	0.251	8.371	0.8605	Medium	12	12.07	0.244	8.121	0.8912	High	12	12.08	0.424	14.12	0.8838	Medium	12
APO	657	662	LYYCRF	11.24	2	4	11.4	11.65	0.1	2.509	0.939	High	11.4	11.64	0.133	3.327	0.9293	High	11.41	11.65	0.117	2.932	0.9384	High	11.4	11.65	0.143	3.582	0.932	High	11.4	11.65	0.133	3.331	0.929	High	11.41	11.64	0.142	3.549	0.9273	High	11.4	11.65	0.161	4.036	0.9087	High	11.41
APO	663	668	AARPVL	7.05	1	3	7.32	7.55	0.383	12.781	0.9349	Medium	7.31	7.55	0.393	13.102	0.9276	Medium	7.32	7.55	0.379	12.62	0.9097	Medium	7.31	7.55	0.886	29.531	0.8991	Medium	7.32	7.55	0.882	29.412	0.8971	Medium	7.31	7.55	0.873	29.09	0.8994	Medium	7.32	7.55	1.314	43.787	0.8924	Medium	7.32
APO	669	676	LQVYQTEL	10.55	1	6	10.9	11.01	0.108	1.804	0.9014	High	10.9	11.01	0.111	1.858	0.9049	High	10.9	11.01	0.156	2.597	0.9048	High	10.9	11.01	0.256	4.273	0.8961	High	10.9	11.01	0.185	3.083	0.9037	High	10.9	11.01	0.252	4.207	0.9054	High	10.9	11.01	0.505	8.413	0.9104	Medium	10.9
APO	669	677	LQVYQTELT	9.68	1	7	9.95	10.12	0.12	1.718	0.8263	Medium	9.95	10.12	0.139	1.992	0.8213	Medium	9.95	10.12	0.189	2.706	0.7555	Medium	9.95	10.12	0.278	3.974	0.7968	Medium	9.95	10.12	0.158	2.258	0.7839	Medium	9.96	10.12	0.211	3.015	0.7932	Medium	9.95	10.12	0.369	5.275	0.7811	Medium	9.95
APO	669	678	LQVYQTELTF	12.73	1	8	13.06	13.09	0.217	2.71	0.8469	Medium	13.05	13.09	0.211	2.642	0.8573	Medium	13.06	13.09	0.142	1.773	0.8303	Medium	13.06	13.09	0.21	2.624	0.8348	Medium	13.05	13.09	0.165	2.064	0.8271	Medium	13.05	13.09	0.208	2.601	0.8286	Medium	13.06	13.09	0.433	5.412	0.825	Medium	13.06
APO	672	676	YQTEL	8.95	1	3	8.92	8.96	0.076	2.54	0.7656	Medium	8.92	8.97	0.082	2.745	0.6866	Medium	8.99	9.06	0.098	3.254	0.7892	Medium	8.92	8.96	0.116	3.883	0.729	Medium	9.01	9.08	0.081	2.704	0.7771	Medium	8.92	8.97	0.098	3.275	0.7451	Medium	8.92	8.96	0.121	4.048	0.6058	Medium	8.92
APO	672	677	YQTELT	7.44	1	4	7.68	7.83	0.129	3.232	0.7411	Medium	7.68	7.83	0.134	3.353	0.7216	Medium	7.77	7.84	0.142	3.549	0.7345	Medium	7.68	7.83	0.14	3.51	0.7105	Medium	7.82	7.89	0.143	3.573	0.7709	Medium	7.68	7.82	0.173	4.336	0.7094	Medium	7.83	7.9	0.134	3.343	0.7277	Medium	7.69
APO	677	686	TFITGEKTTE	7.37	1	8	7.46	7.79	1.837	22.968	0.9046	Medium	7.46	7.79	1.86	23.249	0.9175	High	7.47	7.8	1.961	24.515	0.9098	Medium	7.46	7.79	2.973	37.157	0.8958	Medium	7.47	7.79	2.912	36.402	0.8976	Medium	7.46	7.79	3.02	37.752	0.9009	Medium	7.47	7.8	4.537	56.71	0.9005	Medium	7.47
APO	678	686	FITGEKTTE	6.17	1	7	6.42	6.62	1.783	25.465	0.8098	Medium	6.42	6.62	1.762	25.172	0.8116	Medium	6.42	6.62	1.859	26.557	0.7994	Medium	6.42	6.62	2.749	39.27	0.8189	Medium	6.42	6.62	2.742	39.169	0.8043	Medium	6.42	6.62	2.817	40.248	0.8037	Medium	6.42	6.62	3.85	55.007	0.787	Medium	6.42
APO	687	693	IFIHSLE	9.8	2	5	10.01	10.13	0.12	2.398	0.8816	Medium	10.01	10.12	0.1	2	0.8875	Medium	10.01	10.13	0.162	3.239	0.8582	Medium	10.01	10.13	0.121	2.419	0.8984	Medium	10.01	10.13	0.12	2.397	0.8812	Medium	10.02	10.13	0.15	3.004	0.9045	Medium	10.01	10.13	0.183	3.655	0.8604	Medium	10.01
APO	687	726	IFIHSLELGHSAATRAIKASGPGSKRLGIDGDREAVPLTL	9.64	5	36	9.93	10.28	13.675	37.986	0.8668	Medium	9.93	10.28	13.936	38.712	0.8647	Medium	9.94	10.28	13.377	37.16	0.8607	Medium	9.93	10.28	15.15	42.084	0.872	Medium	9.93	10.28	14.604	40.566	0.8648	Medium	9.94	10.28	14.788	41.078	0.8609	Medium	9.93	10.28	14.824	41.177	0.8687	Medium	9.94
APO	688	694	FIHSLEL	10.15	2	5	10.01	10.13	0.12	2.398	0.8816	Medium	10.01	10.12	0.1	2	0.8875	Medium	10.01	10.13	0.162	3.239	0.8582	Medium	10.01	10.13	0.121	2.419	0.8984	Medium	10.01	10.13	0.12	2.397	0.8812	Medium	10.02	10.13	0.15	3.004	0.9045	Medium	10.01	10.13	0.183	3.655	0.8604	Medium	10.01
APO	689	726	IHSLELGHSAATRAIKASGPGSKRLGIDGDREAVPLTL	8.88	5	34	8.95	9.38	14.016	41.223	0.7942	Medium	8.96	9.39	14.285	42.014	0.7828	Medium	8.95	9.38	13.644	40.13	0.7853	Medium	8.95	9.38	15.293	44.979	0.7925	Medium	8.95	9.38	15.075	44.337	0.7779	Medium	8.96	9.39	14.96	43.999	0.7912	Medium	8.95	9.38	15.023	44.185	0.7897	Medium	8.95
APO	692	726	LELGHSAATRAIKASGPGSKRLGIDGDREAVPLTL	8.89	4	31	9.13	9.21	13.716	44.245	0.7882	Medium	9.13	9.21	13.868	44.737	0.7642	Medium	9.13	9.21	13.699	44.19	0.7153	Medium	9.13	9.21	15.002	48.393	0.7659	Medium	9.13	9.21	14.749	47.577	0.7716	Medium	9.13	9.22	14.702	47.427	0.7774	Medium	9.13	9.21	14.933	48.171	0.7375	Medium	9.13
APO	694	726	LGHSAATRAIKASGPGSKRLGIDGDREAVPLTL	8.51	5	29	8.59	8.83	13.613	46.94	0.7829	Medium	8.59	8.83	13.715	47.293	0.7878	Medium	8.59	8.84	13.391	46.175	0.7722	Medium	8.59	8.83	14.749	50.858	0.8059	Medium	8.59	8.83	14.67	50.588	0.7781	Medium	8.6	8.84	14.696	50.675	0.7924	Medium	8.59	8.84	14.669	50.584	0.7759	Medium	8.59
APO	727	744	QIIYSKGAISGRSRWSNM	8.5	4	16	8.57	8.99	3.616	22.597	0.9144	High	8.57	9	3.748	23.423	0.9101	High	8.58	9	3.64	22.752	0.9107	High	8.57	8.99	5.747	35.921	0.923	High	8.57	8.99	5.626	35.16	0.9184	High	8.58	9	5.664	35.402	0.9119	High	8.58	9	6.893	43.083	0.9243	High	8.58
APO	745	749	EKLCT	5.21	1	3	5.47	5.64	0.501	16.709	0.9062	Medium	5.47	5.63	0.553	18.435	0.9075	Medium	5.47	5.64	0.593	19.755	0.8861	Medium	5.47	5.64	1.631	54.382	0.889	Medium	5.47	5.64	1.621	54.044	0.8909	Medium	5.47	5.63	1.675	55.84	0.891	Medium	5.47	5.64	1.852	61.733	0.8705	Medium	5.47
APO	750	763	SVNLSKACRQQEEL	8.02	3	12	8.23	8.51	6.231	51.926	0.9201	High	8.23	8.51	6.316	52.636	0.928	High	8.23	8.52	6.244	52.032	0.9309	High	8.23	8.51	6.791	56.595	0.9235	High	8.23	8.52	6.766	56.384	0.926	High	8.23	8.51	6.757	56.307	0.9355	High	8.23	8.52	7.125	59.379	0.9324	High	8.23
APO	750	769	SVNLSKACRQQEELDSSTEA	7.96	3	18	8.28	8.36	10.249	56.939	0.8593	Medium	8.28	8.36	10.361	57.561	0.8869	Medium	8.28	8.37	10.219	56.77	0.875	Medium	8.28	8.36	10.892	60.509	0.8416	Medium	8.28	8.36	10.867	60.373	0.8688	Medium	8.28	8.36	10.823	60.127	0.814	Medium	8.28	8.37	11.248	62.487	0.8763	Medium	8.28
APO	754	763	SKACRQQEEL	5.52	2	8	5.84	5.93	5.226	65.319	0.9193	Medium	5.84	5.93	5.366	67.069	0.9249	Medium	5.84	5.93	5.364	67.046	0.9125	Medium	5.84	5.93	5.432	67.901	0.9154	Medium	5.84	5.93	5.463	68.282	0.9169	Medium	5.84	5.93	5.509	68.866	0.9268	Medium	5.84	5.93	5.576	69.699	0.8887	Medium	5.84
APO	754	769	SKACRQQEELDSSTEA	5.84	2	14	5.99	6.25	9.137	65.268	0.8172	Medium	5.99	6.24	9.449	67.49	0.8342	Medium	5.99	6.24	9.411	67.224	0.7771	Medium	5.99	6.25	9.496	67.83	0.7853	Medium	5.99	6.24	9.724	69.456	0.7856	Medium	5.99	6.24	9.616	68.683	0.7439	Medium	5.99	6.24	9.721	69.438	0.7851	Medium	5.99
APO	768	774	EALTLNL	11.99	1	5	12.23	12.32	1.044	20.889	0.8942	Medium	12.22	12.32	1.094	21.885	0.908	Medium	12.23	12.32	1.09	21.804	0.9062	Medium	12.23	12.32	1.765	35.296	0.9097	Medium	12.22	12.32	1.73	34.592	0.9026	Medium	12.22	12.32	1.86	37.197	0.8811	Medium	12.23	12.32	1.852	37.039	0.87	Medium	12.23
APO	770	774	LTLNL	11.56	1	3	11.77	12.06	0.644	21.47	0.9147	Medium	11.76	12.06	0.65	21.673	0.927	Medium	11.77	12.06	0.671	22.357	0.921	Medium	11.77	12.06	0.989	32.962	0.9205	Medium	11.76	12.06	0.988	32.929	0.907	Medium	11.77	12.05	1.01	33.652	0.9223	Medium	11.76	12.06	1.008	33.6	0.9164	Medium	11.77
APO	775	794	TEVVKRQTPKSKKGFNQIST	5.42	3	17	5.25	5.46	9.761	57.417	0.7361	Medium	5.24	5.45	10.065	59.205	0.7094	Medium	5.24	5.45	10.167	59.806	0.6755	Medium	5.25	5.46	10.828	63.692	0.7345	Medium	5.24	5.45	10.883	64.016	0.6949	Medium	5.24	5.45	10.949	64.408	0.7088	Medium	5.24	5.45	11.348	66.751	0.6625	Medium	5.24
APO	775	796	TEVVKRQTPKSKKGFNQISTSQ	4.96	3	19	5.24	5.3	10.998	57.883	0.8683	Medium	5.25	5.32	11.135	58.603	0.8836	Medium	5.28	5.39	11.37	59.841	0.8964	Medium	5.28	5.39	11.802	62.118	0.9055	High	5.28	5.38	11.98	63.051	0.9052	Medium	5.27	5.38	12.188	64.147	0.9122	High	5.28	5.39	12.58	66.212	0.9009	High	5.28
APO	775	815	TEVVKRQTPKSKKGFNQISTSQIKVDKVQIIGSNSCPFAVC	9.69	5	37	9.72	10.19	7.656	20.692	0.7978	Medium	9.72	10.18	7.556	20.422	0.789	Medium	9.73	10.19	7.549	20.403	0.7868	Medium	9.83	9.9	10.175	27.499	0.8048	Medium	9.72	10.19	9.094	24.578	0.7579	Medium	9.73	10.19	9.259	25.026	0.7747	Medium	9.73	10.19	10.169	27.485	0.79	Medium	9.73
APO	777	815	VVKRQTPKSKKGFNQISTSQIKVDKVQIIGSNSCPFAVC	9.88	5	35	9.9	9.96	6.388	18.252	0.8376	Medium	9.9	9.96	6.598	18.851	0.8426	Medium	9.9	9.96	6.419	18.339	0.8257	Medium	9.9	9.96	7.771	22.204	0.8191	Medium	9.9	9.96	7.338	20.965	0.8098	Medium	9.91	9.96	7.606	21.731	0.8264	Medium	9.9	9.96	8.17	23.344	0.7917	Medium	9.9
APO	797	815	IKVDKVQIIGSNSCPFAVC	11.46	3	16	11.59	11.81	1.147	7.166	0.9309	High	11.59	11.8	1.164	7.277	0.9269	High	11.59	11.81	1.152	7.201	0.929	High	11.59	11.81	1.536	9.598	0.9281	High	11.59	11.8	1.456	9.101	0.9168	High	11.58	11.8	1.596	9.974	0.9276	High	11.59	11.81	1.641	10.255	0.9194	Medium	11.59
APO	797	816	IKVDKVQIIGSNSCPFAVCL	12.97	3	17	12.93	13.19	1.224	7.198	0.89	Medium	12.93	13.18	1.204	7.082	0.8969	Medium	12.93	13.18	1.231	7.239	0.8924	Medium	12.93	13.19	1.783	10.491	0.899	Medium	12.93	13.18	1.717	10.097	0.8934	Medium	12.93	13.18	1.833	10.781	0.9066	Medium	12.93	13.18	2.437	14.337	0.8782	Medium	12.93
APO	816	826	LDQDERKILQS	7.38	3	9	7.64	7.73	1.786	19.841	0.8505	Medium	7.64	7.73	1.927	21.41	0.8504	Medium	7.64	7.74	1.959	21.77	0.8327	Medium	7.64	7.73	4.539	50.435	0.8551	Medium	7.64	7.73	4.378	48.64	0.833	Medium	7.64	7.73	4.379	48.654	0.8625	Medium	7.64	7.74	5.578	61.98	0.8218	Medium	7.64
APO	816	830	LDQDERKILQSVIRC	10.93	4	13	11.26	11.4	1.774	13.645	0.9276	High	11.26	11.4	1.902	14.631	0.9202	High	11.26	11.41	1.908	14.674	0.9219	High	11.26	11.4	4.335	33.349	0.9333	High	11.26	11.4	4.291	33.004	0.9322	High	11.27	11.41	4.312	33.168	0.9296	High	11.26	11.4	5.471	42.085	0.9326	High	11.26
APO	821	830	RKILQSVIRC	7.8	3	8	8.06	8.15	0.981	12.261	0.85	Medium	8.06	8.15	1.003	12.534	0.8543	Medium	8.06	8.16	1.045	13.067	0.8185	Medium	8.06	8.15	2.136	26.7	0.867	Medium	8.06	8.15	2.07	25.875	0.8126	Medium	8.06	8.15	2.129	26.617	0.8657	Medium	8.06	8.16	2.559	31.99	0.8378	Medium	8.06
APO	831	861	EVSPCYKPEKSSLCPPPQRPSYPPAPATPDL	8.93	4	19	9.08	9.23	10.989	57.835	0.901	High	9.08	9.23	11.057	58.194	0.8932	High	9.08	9.23	11.015	57.975	0.9005	High	9.08	9.23	11.628	61.198	0.901	High	9.08	9.23	11.509	60.575	0.8957	High	9.08	9.23	11.515	60.607	0.9031	High	9.08	9.23	12.015	63.235	0.8918	High	9.08
APO	844	861	CPPPQRPSYPPAPATPDL	9.28	2	9	9.37	9.49	6.945	77.171	0.8959	High	9.38	9.5	6.992	77.687	0.8948	High	9.37	9.49	6.925	76.946	0.8806	Medium	9.37	9.49	7.01	77.891	0.8982	High	9.37	9.49	6.972	77.465	0.8908	High	9.38	9.49	7.072	78.579	0.9024	High	9.37	9.49	6.994	77.709	0.877	High	9.37
APO	865	877	LCLPIMTFSGALP	14.35	2	9	14.55	14.77	1.812	20.13	0.7961	Medium	14.55	14.77	1.655	18.391	0.7845	Medium	14.55	14.78	1.69	18.776	0.7695	Medium	14.55	14.77	2.597	28.854	0.7431	Medium	14.55	14.77	2.651	29.459	0.7767	Medium	14.55	14.77	2.42	26.894	0.7422	Medium	14.55	14.78	3.085	34.276	0.7452	Medium	14.55
APO	868	877	PIMTFSGALP	12.67	2	7	12.93	13.14	1.653	23.616	0.9097	Medium	12.92	13.14	1.699	24.278	0.9206	Medium	12.92	13.14	1.659	23.695	0.9144	Medium	12.93	13.14	2.619	37.41	0.8936	Medium	12.92	13.14	2.65	37.854	0.9028	Medium	12.92	13.14	2.602	37.174	0.8889	Medium	12.92	13.14	3.416	48.801	0.901	Medium	12.92
APO	872	877	FSGALP	9.48	1	3	9.73	9.83	1.022	34.06	0.8682	Medium	9.73	9.82	1.079	35.965	0.8669	Medium	9.74	9.83	1.055	35.155	0.8676	Medium	9.73	9.83	1.847	61.57	0.8889	Medium	9.73	9.82	1.853	61.771	0.8748	Medium	9.74	9.83	1.819	60.634	0.8832	Medium	9.73	9.83	2.315	77.167	0.8694	Medium	9.73
IPI-549	11	18	DRIQHALE	6.49	2	6	6.45	6.52	2.912	48.539	0.7923	Medium	6.48	6.54	2.961	49.343	0.8245	Medium	6.56	6.63	2.847	47.453	0.8168	Medium	6.47	6.54	3.476	57.927	0.8082	Medium	6.47	6.6	3.531	58.848	0.8104	Medium	6.47	6.6	3.483	58.055	0.8198	Medium	6.52	6.59	3.834	63.907	0.8175	Medium	6.47
IPI-549	11	26	DRIQHALERCLHGLSL	11.9	4	14	12.31	12.49	6.639	47.421	0.8725	Medium	12.3	12.48	6.896	49.257	0.8643	Medium	12.3	12.49	6.889	49.205	0.8703	Medium	12.29	12.35	8.485	60.609	0.8321	Medium	12.32	12.39	8.533	60.952	0.8499	Medium	12.31	12.49	8.648	61.774	0.8453	Medium	12.3	12.49	8.956	63.97	0.8588	Medium	12.3
IPI-549	19	26	RCLHGLSL	8.78	2	6	9.09	9.2	2.731	45.514	0.836	Medium	9.09	9.19	2.74	45.66	0.8348	Medium	9.09	9.2	2.753	45.879	0.796	Medium	9.09	9.19	2.97	49.501	0.8277	Medium	9.09	9.2	3.004	50.068	0.8156	Medium	9.09	9.2	2.895	48.247	0.8391	Medium	9.09	9.2	3.094	51.572	0.8382	Medium	9.09
IPI-549	27	37	SRRSTSWSAGL	8.94	2	9	9.17	9.2	4.726	52.51	0.7737	Medium	9.17	9.2	4.799	53.326	0.8148	Medium	9.17	9.21	4.944	54.931	0.8363	Medium	9.17	9.2	5.006	55.62	0.7828	Medium	9.17	9.2	5.092	56.581	0.8276	Medium	9.18	9.21	5.046	56.065	0.7875	Medium	9.17	9.2	5.126	56.953	0.8061	Medium	9.17
IPI-549	42	47	WSLQEL	13.14	1	4	13.41	13.57	1.446	36.157	0.8773	Medium	13.41	13.57	1.518	37.955	0.8846	Medium	13.41	13.57	1.468	36.689	0.8643	Medium	13.44	13.51	2.476	61.912	0.8372	Medium	13.41	13.57	2.557	63.915	0.8573	Medium	13.41	13.57	2.638	65.946	0.8361	Medium	13.41	13.57	2.879	71.982	0.8769	Medium	13.41
IPI-549	47	55	LVSRDPGHF	6.82	1	6	7.01	7.08	2.03	33.827	0.6194	Medium	7.02	7.09	2.018	33.639	0.7007	Medium	6.91	7.11	1.768	29.47	0.5191	Medium	6.9	7.1	2.369	39.491	0.7198	Medium	6.9	7.11	2.422	40.361	0.662	Medium	6.9	7.1	2.361	39.357	0.6762	Medium	7.01	7.09	2.901	48.354	0.6296	Medium	6.9
IPI-549	48	55	VSRDPGHF	5.94	1	5	6.14	6.37	1.163	23.257	0.8581	Medium	6.13	6.37	1.241	24.82	0.8551	Medium	6.13	6.38	1.208	24.169	0.8157	Medium	6.14	6.38	1.712	34.23	0.8679	Medium	6.13	6.38	1.754	35.079	0.8585	Medium	6.13	6.37	1.663	33.262	0.8423	Medium	6.14	6.38	2.048	40.96	0.8395	Medium	6.13
IPI-549	56	68	LILLEQILQKTRE	13.04	3	11	13.25	13.39	0.114	1.037	0.899	Medium	13.25	13.39	0.099	0.899	0.9048	Medium	13.25	13.39	0.163	1.477	0.8952	Medium	13.25	13.4	0.179	1.627	0.8844	Medium	13.25	13.39	0.197	1.794	0.9026	Medium	13.25	13.4	0.152	1.383	0.8954	Medium	13.25	13.4	0.534	4.856	0.8743	Medium	13.25
IPI-549	59	68	LEQILQKTRE	6.84	3	8	7.09	7.34	0.183	2.29	0.9246	High	7.09	7.34	0.198	2.475	0.9377	High	7.09	7.34	0.264	3.303	0.9416	High	7.09	7.34	0.197	2.468	0.9372	High	7.09	7.34	0.21	2.629	0.9358	High	7.09	7.34	0.253	3.165	0.9113	High	7.09	7.34	0.615	7.691	0.9282	High	7.09
IPI-549	59	78	LEQILQKTREVQEKGTYDLL	10.44	2	18	10.44	10.52	1.222	6.788	0.8201	Medium	10.44	10.51	1.539	8.552	0.8231	Medium	10.44	10.51	1.687	9.373	0.7878	Medium	10.44	10.51	3.21	17.835	0.8028	Medium	10.44	10.51	3.275	18.194	0.8212	Medium	10.44	10.52	3.197	17.762	0.8015	Medium	10.44	10.51	5.751	31.952	0.7799	Medium	10.44
IPI-549	59	83	LEQILQKTREVQEKGTYDLLAPLAL	12.31	4	22	12.65	12.69	1.573	7.149	0.8265	Medium	12.64	12.69	1.68	7.636	0.8262	Medium	12.65	12.69	1.776	8.071	0.7877	Medium	12.65	12.69	3.649	16.587	0.809	Medium	12.65	12.69	3.693	16.786	0.8096	Medium	12.65	12.69	3.717	16.895	0.8056	Medium	12.65	12.69	6.789	30.86	0.7779	Medium	12.65
IPI-549	59	84	LEQILQKTREVQEKGTYDLLAPLALL	13.97	4	23	13.93	13.97	1.471	6.397	0.7993	Medium	13.93	13.97	1.555	6.761	0.7896	Medium	13.93	13.97	1.603	6.97	0.6888	Medium	13.93	13.98	3.63	15.78	0.7507	Medium	13.93	13.97	3.735	16.238	0.7165	Medium	13.93	13.98	3.675	15.978	0.7352	Medium	13.98	14.04	6.774	29.452	0.7227	Medium	13.93
IPI-549	69	78	VQEKGTYDLL	10.41	1	8	10.56	10.67	1.288	16.095	0.858	Medium	10.55	10.66	1.324	16.55	0.839	Medium	10.56	10.66	1.237	15.459	0.7663	Medium	10.56	10.67	2.718	33.969	0.8199	Medium	10.56	10.66	2.561	32.018	0.797	Medium	10.56	10.67	2.673	33.415	0.8255	Medium	10.56	10.67	4.12	51.503	0.7919	Medium	10.56
IPI-549	69	83	VQEKGTYDLLAPLAL	13.35	2	12	13.56	13.84	0.997	8.309	0.8616	Medium	13.56	13.84	1.167	9.724	0.861	Medium	13.56	13.84	1.251	10.429	0.8426	Medium	13.56	13.85	2.311	19.26	0.8582	Medium	13.56	13.85	2.445	20.378	0.8592	Medium	13.56	13.85	2.268	18.9	0.8483	Medium	13.56	13.85	3.936	32.797	0.8601	Medium	13.56
IPI-549	69	84	VQEKGTYDLLAPLALL	14.23	2	13	14.33	14.53	0.909	6.996	0.879	Medium	14.33	14.53	0.96	7.382	0.8741	Medium	14.33	14.53	0.942	7.244	0.8656	Medium	14.33	14.53	2.026	15.583	0.8707	Medium	14.33	14.53	2.072	15.935	0.8773	Medium	14.34	14.54	2	15.381	0.8698	Medium	14.33	14.53	3.461	26.622	0.8538	Medium	14.33
IPI-549	84	90	LFYSTVL	12.93	1	5	13.2	13.4	0.07	1.394	0.9031	Medium	13.21	13.4	0.093	1.856	0.8996	Medium	13.21	13.4	0.11	2.2	0.8945	Medium	13.21	13.4	0.075	1.501	0.9035	Medium	13.21	13.4	0.099	1.984	0.9073	Medium	13.21	13.41	0.084	1.678	0.9007	Medium	13.21	13.4	0.089	1.787	0.9041	Medium	13.21
IPI-549	85	90	FYSTVL	11.25	1	4	11.59	11.69	0.114	2.855	0.781	Medium	11.59	11.69	0.077	1.927	0.8301	Medium	11.59	11.69	0.097	2.418	0.8626	Medium	11.59	11.69	0.112	2.793	0.779	Medium	11.59	11.69	0.081	2.025	0.8203	Medium	11.59	11.69	0.087	2.187	0.8092	Medium	11.59	11.69	0.113	2.824	0.8254	Medium	11.59
IPI-549	91	101	CTPHFPPDSDL	9.64	2	6	9.87	10.1	1.294	21.559	0.9232	Medium	9.87	10.09	1.321	22.021	0.9133	Medium	9.87	10.09	1.374	22.898	0.9054	Medium	9.87	10.09	2.062	34.369	0.9123	Medium	9.87	10.09	2.088	34.807	0.9083	Medium	9.87	10.1	2.082	34.703	0.9083	Medium	9.87	10.09	2.739	45.642	0.9146	Medium	9.87
IPI-549	91	102	CTPHFPPDSDLL	11.04	2	7	11.09	11.47	1.155	16.494	0.8301	Medium	11.08	11.47	1.189	16.988	0.8208	Medium	11.08	11.47	1.2	17.146	0.7784	Medium	11.09	11.47	2.171	31.02	0.8067	Medium	11.08	11.47	2.195	31.354	0.7663	Medium	11.09	11.47	2.229	31.848	0.7877	Medium	11.09	11.47	3.258	46.546	0.7721	Medium	11.09
IPI-549	91	103	CTPHFPPDSDLLL	12.52	2	8	12.43	12.49	1.097	13.712	0.8006	Medium	12.43	12.48	1.193	14.917	0.7871	Medium	12.43	12.49	1.199	14.986	0.5518	Medium	12.43	12.49	2.094	26.171	0.7866	Medium	12.43	12.49	2.193	27.408	0.7321	Medium	12.43	12.49	2.142	26.781	0.781	Medium	12.43	12.49	3.203	40.033	0.7214	Medium	12.43
IPI-549	124	128	QELLT	8.23	1	3	8.53	8.6	0.313	10.426	0.6374	Medium	8.54	8.61	0.314	10.454	0.65	Medium	8.57	8.63	0.32	10.652	0.6202	Medium	8.48	8.57	0.909	30.301	0.5468	Medium	8.48	8.57	0.956	31.869	0.5579	Medium	8.48	8.55	0.883	29.417	0.5992	Medium	8.51	8.57	1.011	33.715	0.5779	Medium	8.53
IPI-549	127	132	LTFIDA	11.67	1	4	11.65	11.69	0.074	1.851	0.7148	Medium	11.64	11.69	0.097	2.429	0.7069	Medium	11.65	11.69	0.163	4.07	0.5036	Medium	11.65	11.69	0.12	3.005	0.737	Medium	11.65	11.69	0.15	3.761	0.6864	Medium	11.65	11.69	0.13	3.242	0.708	Medium	11.65	11.69	0.234	5.845	0.6661	Medium	11.65
IPI-549	129	164	FIDAELKAPGISYQRLVRAEQGLSTRSHRSSTVTVL	10.51	5	33	10.65	10.76	1.462	4.43	0.7712	Medium	10.65	10.76	1.56	4.728	0.8022	Medium	10.65	10.76	1.557	4.719	0.6838	Medium	10.65	10.76	1.514	4.589	0.7765	Medium	10.65	10.76	1.888	5.72	0.757	Medium	10.65	10.76	1.913	5.797	0.782	Medium	10.65	10.76	2.173	6.585	0.7187	Medium	10.65
IPI-549	134	144	LKAPGISYQRL	8.83	3	8	9	9.06	0.352	4.403	0.7654	Medium	9	9.06	0.336	4.198	0.7808	Medium	9	9.06	0.386	4.826	0.7342	Medium	9	9.06	0.248	3.106	0.7568	Medium	9	9.06	0.301	3.757	0.7739	Medium	9.01	9.07	0.352	4.403	0.7815	Medium	9	9.06	0.372	4.655	0.8001	Medium	9
IPI-549	145	162	VRAEQGLSTRSHRSSTVT	4.34	4	16	4.59	4.67	2.433	15.203	0.8832	Medium	4.59	4.67	2.497	15.607	0.881	Medium	4.59	4.67	2.723	17.017	0.8079	Medium	4.59	4.67	2.82	17.623	0.8891	Medium	4.59	4.67	2.651	16.572	0.869	Medium	4.59	4.67	2.972	18.573	0.852	Medium	4.59	4.67	3.312	20.701	0.826	Medium	4.59
IPI-549	145	164	VRAEQGLSTRSHRSSTVTVL	6.57	2	18	6.97	7.09	1.584	8.799	0.8962	Medium	6.97	7.09	1.754	9.744	0.9075	Medium	6.97	7.09	1.867	10.374	0.9067	Medium	6.97	7.09	1.766	9.812	0.8858	Medium	6.97	7.09	1.785	9.919	0.8889	Medium	6.97	7.09	2.015	11.194	0.9006	Medium	6.98	7.09	2.248	12.491	0.8716	Medium	6.97
IPI-549	165	172	LLNPVEVQ	9.53	1	5	9.46	9.67	1.822	36.433	0.8924	Medium	9.6	9.67	1.891	37.829	0.8906	Medium	9.46	9.67	1.974	39.481	0.9022	Medium	9.46	9.67	3.748	74.956	0.8994	Medium	9.46	9.67	3.814	76.276	0.8996	Medium	9.46	9.67	3.745	74.909	0.8969	Medium	9.46	9.67	4.175	83.504	0.8831	Medium	9.57
IPI-549	165	175	LLNPVEVQAEF	12.36	1	8	12.59	12.68	3.564	44.551	0.8854	Medium	12.63	12.72	3.622	45.276	0.891	Medium	12.54	12.81	3.626	45.328	0.8623	Medium	12.54	12.82	5.884	73.546	0.872	Medium	12.54	12.81	5.958	74.478	0.8771	Medium	12.54	12.82	5.907	73.84	0.875	Medium	12.54	12.82	6.547	81.833	0.8322	Medium	12.54
IPI-549	171	175	VQAEF	8.93	1	3	9.25	9.36	1.74	57.999	0.7411	Medium	9.25	9.35	1.746	58.204	0.7626	Medium	9.26	9.36	1.78	59.333	0.7435	Medium	9.25	9.35	2.058	68.593	0.7488	Medium	9.25	9.36	2.107	70.247	0.759	Medium	9.26	9.36	2.061	68.685	0.7599	Medium	9.25	9.35	2.389	79.643	0.7605	Medium	9.25
IPI-549	176	193	LDVADKLSTPGPSPHSAY	8.3	2	13	8.49	8.85	3.038	23.37	0.9214	High	8.49	8.85	3.226	24.815	0.919	High	8.49	8.85	3.186	24.511	0.9157	High	8.49	8.85	4.587	35.286	0.9193	High	8.49	8.85	4.634	35.644	0.9366	High	8.49	8.86	4.388	33.755	0.8963	High	8.49	8.85	6.583	50.639	0.9174	High	8.49
IPI-549	177	193	DVADKLSTPGPSPHSAY	7.86	3	12	7.85	7.95	3.063	25.525	0.8157	Medium	7.85	7.95	3.02	25.163	0.7794	Medium	7.85	7.95	3.406	28.384	0.8016	Medium	7.85	7.95	4.78	39.83	0.8093	Medium	7.85	7.95	4.851	40.424	0.8122	Medium	7.85	7.95	4.733	39.443	0.811	Medium	7.85	7.95	6.803	56.688	0.8092	Medium	7.85
IPI-549	194	198	ITLLL	14.02	1	3	13.73	13.98	0.044	1.461	0.9536	Medium	13.73	13.98	0.053	1.781	0.9544	Medium	13.74	13.98	0.074	2.465	0.9559	Medium	13.74	13.98	0.029	0.961	0.9575	Medium	13.74	13.98	0.045	1.495	0.9512	Medium	13.74	13.98	0.052	1.731	0.948	Medium	13.74	13.98	0.062	2.081	0.9583	Medium	13.74
IPI-549	197	209	LLHAFQATFGAHC	10.42	3	11	10.74	10.8	1.275	11.589	0.826	Medium	10.74	10.8	1.191	10.826	0.8278	Medium	10.74	10.8	1.31	11.909	0.8371	Medium	10.74	10.8	1.402	12.746	0.8076	Medium	10.74	10.8	1.362	12.385	0.8335	Medium	10.74	10.8	1.385	12.587	0.8178	Medium	10.74	10.8	1.595	14.504	0.8321	Medium	10.74
IPI-549	215	226	HRRLQSKTLAEL	6.57	4	10	6.92	7.06	1.921	19.211	0.7969	Medium	6.92	7.06	2.032	20.319	0.8114	Medium	6.92	7.07	2.043	20.433	0.7615	Medium	6.93	7.06	2.346	23.464	0.7953	Medium	6.92	7.06	2.344	23.44	0.8252	Medium	6.92	7.06	2.271	22.708	0.7886	Medium	6.93	7.07	3.2	31.996	0.7952	Medium	6.92
IPI-549	230	235	FTETAE	6.27	1	4	6.2	6.28	0.221	5.513	0.6049	Medium	6.19	6.27	0.183	4.586	0.623	Medium	6.16	6.24	0.215	5.377	0.4936	Medium	6.16	6.25	0.175	4.371	0.6055	Medium	6.16	6.24	0.183	4.586	0.5406	Medium	6.15	6.24	0.214	5.349	0.5879	Medium	6.16	6.25	0.153	3.834	0.5632	Medium	6.16
IPI-549	231	238	TETAEAQE	4.24	1	6	4.46	4.62	0.161	2.675	0.845	Medium	4.46	4.61	0.16	2.665	0.8502	Medium	4.56	4.63	0.245	4.085	0.7896	Medium	4.46	4.62	0.183	3.055	0.8573	Medium	4.46	4.61	0.181	3.009	0.8401	Medium	4.53	4.59	0.395	6.585	0.8209	Medium	4.46	4.62	0.329	5.487	0.8167	Medium	4.46
IPI-549	239	248	LASGIGDAAE	7.32	1	8	7.55	7.72	2.33	29.131	0.7332	Medium	7.55	7.72	2.541	31.756	0.7357	Medium	7.55	7.72	2.581	32.259	0.7345	Medium	7.55	7.72	3.086	38.569	0.7469	Medium	7.55	7.72	3.216	40.195	0.7475	Medium	7.55	7.72	3.164	39.55	0.7335	Medium	7.55	7.72	4.255	53.187	0.721	Medium	7.55
IPI-549	239	257	LASGIGDAAEARQWLRTKL	11.14	3	17	11.2	11.34	1.968	11.577	0.7302	Medium	11.19	11.33	2.008	11.814	0.7104	Medium	11.19	11.34	1.98	11.649	0.6205	Medium	11.19	11.34	2.987	17.571	0.7199	Medium	11.19	11.34	2.956	17.387	0.7047	Medium	11.2	11.34	2.939	17.287	0.7139	Medium	11.19	11.34	4.972	29.246	0.6764	Medium	11.19
IPI-549	240	257	ASGIGDAAEARQWLRTKL	10.78	3	16	11.02	11.09	2.098	13.11	0.7503	Medium	11.02	11.08	2.125	13.284	0.7564	Medium	11.02	11.08	2.302	14.389	0.6631	Medium	11.02	11.09	2.865	17.906	0.7272	Medium	11.02	11.08	2.954	18.464	0.7161	Medium	11.02	11.09	2.988	18.672	0.7433	Medium	11.02	11.09	4.855	30.341	0.6941	Medium	11.02
IPI-549	249	257	ARQWLRTKL	8.57	3	7	8.53	8.62	0.111	1.593	0.8865	Medium	8.53	8.62	0.106	1.517	0.9091	Medium	8.53	8.62	0.151	2.157	0.9343	Medium	8.53	8.62	0.136	1.938	0.8829	Medium	8.53	8.62	0.136	1.946	0.9119	Medium	8.54	8.61	0.14	1.997	0.9084	Medium	8.53	8.62	0.46	6.574	0.9198	Medium	8.53
IPI-549	252	257	WLRTKL	8.4	2	4	8.67	8.9	0.064	1.595	0.92	Medium	8.67	8.9	0.065	1.636	0.917	Medium	8.67	8.9	0.107	2.67	0.9143	Medium	8.67	8.9	0.062	1.56	0.9166	Medium	8.67	8.9	0.074	1.85	0.9135	Medium	8.66	8.91	0.093	2.327	0.9111	Medium	8.67	8.9	0.161	4.022	0.9085	Medium	8.67
IPI-549	258	270	QAVGEKAGFPGVL	10.53	2	10	10.78	10.87	1.672	16.717	0.8573	Medium	10.78	10.86	1.747	17.473	0.8571	Medium	10.78	10.87	1.891	18.909	0.8768	Medium	10.78	10.87	3.335	33.349	0.8327	Medium	10.78	10.87	3.489	34.89	0.8388	Medium	10.79	10.87	3.458	34.576	0.8512	Medium	10.78	10.87	4.941	49.408	0.8387	Medium	10.78
IPI-549	271	288	DTAKPGKLRTIPIPVARC	7.95	2	13	8.37	8.47	4.686	36.049	0.8486	Medium	8.37	8.46	4.867	37.437	0.858	Medium	8.37	8.47	4.852	37.327	0.8862	High	8.37	8.46	6.859	52.761	0.8525	Medium	8.37	8.47	6.959	53.533	0.8736	Medium	8.37	8.46	6.815	52.42	0.8632	Medium	8.37	8.46	8.18	62.92	0.8557	Medium	8.37
IPI-549	279	288	RTIPIPVARC	7.96	2	6	8.09	8.18	1.148	19.141	0.9273	Medium	8.09	8.18	1.236	20.608	0.9324	Medium	8.09	8.18	1.274	21.233	0.9269	Medium	8.09	8.18	2.964	49.408	0.9225	Medium	8.09	8.18	3.004	50.063	0.9284	Medium	8.09	8.18	2.971	49.513	0.9273	Medium	8.09	8.18	4.021	67.019	0.9298	Medium	8.09
IPI-549	289	298	YTYSWNQDSF	12.31	1	8	12.5	12.62	3.924	49.051	0.9239	Medium	12.49	12.62	3.998	49.978	0.9167	Medium	12.49	12.62	3.993	49.912	0.8772	Medium	12.5	12.62	4.236	52.951	0.925	Medium	12.49	12.62	4.279	53.482	0.9088	Medium	12.5	12.62	4.269	53.365	0.9216	Medium	12.5	12.62	4.856	60.695	0.922	Medium	12.5
IPI-549	291	298	YSWNQDSF	11.77	1	6	12.03	12.12	3.358	55.965	0.9528	Medium	12.02	12.11	3.436	57.27	0.9496	Medium	12.02	12.12	3.431	57.183	0.9246	Medium	12.03	12.12	3.589	59.825	0.9484	Medium	12.02	12.12	3.652	60.859	0.9431	Medium	12.03	12.12	3.65	60.839	0.9489	Medium	12.03	12.12	4.094	68.239	0.9286	Medium	12.03
IPI-549	304	317	ILLKEQELLQPEIL	12.36	2	11	12.57	12.73	5.735	52.136	0.8983	Medium	12.57	12.73	6.071	55.191	0.9013	Medium	12.57	12.73	5.874	53.398	0.8854	Medium	12.57	12.73	7.712	70.112	0.8956	Medium	12.57	12.73	7.827	71.151	0.8855	Medium	12.57	12.73	7.785	70.771	0.8874	Medium	12.57	12.73	8.244	74.944	0.8904	Medium	12.57
IPI-549	304	319	ILLKEQELLQPEILDD	11.98	2	13	12.04	12.2	6.13	47.151	0.7538	Medium	12.06	12.12	6.216	47.816	0.7229	Medium	12.22	12.28	6.08	46.766	0.7053	Medium	12.03	12.19	8.27	63.614	0.7801	Medium	12.03	12.19	8.19	63.001	0.7951	Medium	12.04	12.2	8.297	63.82	0.7777	Medium	12.03	12.19	8.762	67.397	0.7741	Medium	12.03
IPI-549	306	317	LKEQELLQPEIL	11.51	2	9	11.89	12	5.292	58.796	0.9146	High	11.89	12	5.486	60.961	0.918	High	11.89	12	5.424	60.265	0.9226	High	11.89	12	6.713	74.591	0.9081	High	11.89	12	6.809	75.65	0.9054	High	11.89	12	6.733	74.815	0.9118	High	11.89	12	6.797	75.522	0.917	High	11.89
IPI-549	306	321	LKEQELLQPEILDDEE	11.21	2	13	11.42	11.51	5.969	45.919	0.7763	Medium	11.42	11.5	6.09	46.843	0.7682	Medium	11.42	11.5	5.997	46.132	0.6345	Medium	11.42	11.51	7.409	56.993	0.7974	Medium	11.42	11.5	7.279	55.992	0.748	Medium	11.42	11.51	7.183	55.253	0.7666	Medium	11.42	11.51	7.517	57.825	0.6952	Medium	11.42
IPI-549	307	317	KEQELLQPEIL	11.25	2	8	11.42	11.49	4.906	61.33	0.8377	Medium	11.44	11.51	4.983	62.282	0.7634	Medium	11.46	11.55	4.861	60.761	0.8634	Medium	11.46	11.56	5.822	72.78	0.8222	Medium	11.46	11.55	5.928	74.104	0.8473	Medium	11.47	11.56	5.86	73.255	0.8375	Medium	11.46	11.56	5.891	73.637	0.8508	Medium	11.46
IPI-549	309	317	QELLQPEIL	12.27	1	6	12.6	12.68	3.641	60.678	0.6803	Medium	12.57	12.67	3.571	59.512	0.6866	Medium	12.57	12.67	3.586	59.765	0.6511	Medium	12.57	12.67	4.223	70.383	0.6935	Medium	12.57	12.67	4.163	69.384	0.6986	Medium	12.57	12.68	4.288	71.465	0.7122	Medium	12.64	12.71	4.284	71.395	0.6953	Medium	12.57
IPI-549	311	317	LLQPEIL	11.83	1	4	12.07	12.21	3	75.002	0.9302	Medium	12.06	12.21	3.086	77.15	0.9223	Medium	12.07	12.21	3.121	78.014	0.9165	Medium	12.07	12.21	3.185	79.614	0.9273	Medium	12.07	12.21	3.243	81.075	0.9311	Medium	12.07	12.21	3.224	80.599	0.9262	Medium	12.07	12.21	3.232	80.811	0.9369	Medium	12.07
IPI-549	327	332	DEEEDL	8.27	1	4	8.15	8.32	2.152	53.804	0.7287	Medium	8.15	8.32	2.29	57.256	0.7527	Medium	8.16	8.32	2.268	56.697	0.7353	Medium	8.15	8.32	2.261	56.529	0.7148	Medium	8.15	8.32	2.238	55.96	0.7274	Medium	8.15	8.32	2.278	56.959	0.7521	Medium	8.15	8.32	2.259	56.485	0.7378	Medium	8.15
IPI-549	328	332	EEEDL	7.27	1	3	7.57	7.66	1.522	50.743	0.8758	Medium	7.57	7.63	1.569	52.3	0.9	Medium	7.58	7.66	1.535	51.165	0.8708	Medium	7.57	7.66	1.507	50.242	0.8736	Medium	7.58	7.66	1.544	51.483	0.886	Medium	7.57	7.66	1.506	50.209	0.8881	Medium	7.57	7.66	1.572	52.409	0.8822	Medium	7.58
IPI-549	333	345	DADGHCAERDSVL	7.48	2	11	7.73	7.83	4.902	44.563	0.9126	Medium	7.78	7.85	5.065	46.049	0.9116	Medium	7.74	7.83	5.084	46.22	0.9038	Medium	7.73	7.83	4.913	44.661	0.9005	Medium	7.73	7.83	4.961	45.1	0.9064	Medium	7.73	7.83	4.892	44.476	0.9119	Medium	7.81	7.88	5.032	45.744	0.8823	Medium	7.74
IPI-549	346	356	STGSAASHAST	3.6	2	9	3.74	3.96	5.961	66.237	0.9096	Medium	3.74	3.96	6.084	67.596	0.9302	High	3.74	3.96	5.963	66.257	0.9058	Medium	3.74	3.96	6.071	67.457	0.9406	High	3.77	3.85	5.935	65.945	0.943	High	3.74	3.95	6.071	67.459	0.9313	Medium	3.77	3.84	5.915	65.72	0.9285	High	3.84
IPI-549	346	359	STGSAASHASTLSL	8.77	2	12	9	9.19	7.283	60.696	0.8294	Medium	9	9.19	7.182	59.849	0.8501	Medium	9	9.19	7.116	59.303	0.8313	Medium	9	9.19	7.1	59.168	0.8337	Medium	9	9.19	7.04	58.664	0.8334	Medium	9.01	9.19	6.991	58.26	0.8437	Medium	9	9.19	7.043	58.696	0.8447	Medium	9
IPI-549	346	377	STGSAASHASTLSLASSQASGPTLSRQLLTSF	11.94	3	29	12.07	12.16	16.337	56.336	0.8332	Medium	12.06	12.16	16.397	56.543	0.8259	Medium	12.07	12.16	16.548	57.06	0.7178	Medium	12.07	12.16	16.268	56.096	0.8753	Medium	12.07	12.16	16.193	55.839	0.802	Medium	12.07	12.16	16.427	56.646	0.7878	Medium	12.07	12.16	16.224	55.945	0.8169	Medium	12.07
IPI-549	358	374	SLASSQASGPTLSRQLL	10.18	2	14	10.44	10.56	10.174	72.675	0.7393	Medium	10.44	10.55	10.166	72.613	0.7837	Medium	10.44	10.56	10.225	73.035	0.7328	Medium	10.44	10.56	10.185	72.748	0.7551	Medium	10.44	10.56	10.163	72.59	0.7408	Medium	10.44	10.56	10.241	73.149	0.7668	Medium	10.44	10.56	10.179	72.708	0.7539	Medium	10.44
IPI-549	360	369	ASSQASGPTL	7.65	1	7	7.99	8.19	5.091	72.723	0.8791	Medium	7.99	8.19	5.277	75.389	0.8889	Medium	7.99	8.19	5.276	75.367	0.9042	Medium	7.99	8.19	5.143	73.47	0.8826	Medium	7.99	8.19	5.208	74.393	0.8931	Medium	7.98	8.19	5.215	74.5	0.898	Medium	7.99	8.19	5.394	77.059	0.9046	Medium	7.99
IPI-549	360	374	ASSQASGPTLSRQLL	9.9	2	12	10.05	10.12	8.43	70.252	0.7612	Medium	10.01	10.19	8.563	71.358	0.7551	Medium	10.01	10.19	8.677	72.312	0.7952	Medium	10.01	10.19	8.572	71.433	0.7364	Medium	10.01	10.19	8.538	71.151	0.7749	Medium	10.01	10.2	8.552	71.264	0.763	Medium	10.01	10.2	8.511	70.923	0.8072	Medium	10.01
IPI-549	360	377	ASSQASGPTLSRQLLTSF	11.99	2	15	11.99	12.49	9.768	65.121	0.9	Medium	11.98	12.48	9.85	65.667	0.8962	Medium	11.98	12.49	9.691	64.606	0.8835	Medium	11.98	12.49	9.832	65.547	0.9062	Medium	11.98	12.49	9.808	65.388	0.8965	Medium	11.99	12.49	9.844	65.625	0.8942	Medium	11.98	12.49	9.819	65.459	0.8979	Medium	11.98
IPI-549	370	377	SRQLLTSF	10.57	1	6	10.78	10.84	4.75	79.162	0.737	Medium	10.79	10.95	4.714	78.559	0.7769	Medium	10.79	10.95	4.903	81.719	0.7541	Medium	10.79	10.95	4.755	79.253	0.7353	Medium	10.79	10.95	4.819	80.321	0.7808	Medium	10.8	10.95	4.775	79.582	0.787	Medium	10.79	10.95	4.815	80.257	0.7958	Medium	10.79
IPI-549	377	392	FVSGLSDGVDSGYMED	10.85	1	14	10.94	11.36	8.151	58.219	0.8648	Medium	10.94	11.35	8.047	57.476	0.8767	Medium	10.94	11.35	8.069	57.638	0.8663	Medium	10.94	11.35	7.976	56.969	0.8824	Medium	10.94	11.35	8.003	57.164	0.8568	Medium	10.95	11.36	8.136	58.117	0.8393	Medium	10.94	11.35	7.979	56.993	0.8664	Medium	10.94
IPI-549	378	392	VSGLSDGVDSGYMED	9.75	1	13	9.94	10.2	7.053	54.256	0.8787	Medium	9.93	10.19	7.004	53.875	0.8722	Medium	9.93	10.19	7.047	54.21	0.8642	Medium	9.93	10.19	6.937	53.359	0.882	Medium	9.93	10.19	6.988	53.752	0.8753	Medium	9.94	10.2	6.957	53.514	0.8792	Medium	9.93	10.2	6.916	53.201	0.8742	Medium	9.93
IPI-549	393	397	IEESA	4.87	1	3	4.87	5.08	2.122	70.719	0.9422	High	4.93	5.01	2.178	72.606	0.9393	High	4.87	5.08	2.165	72.15	0.935	High	4.87	5.08	2.145	71.487	0.9498	High	4.86	5.07	2.124	70.792	0.9453	High	4.87	5.08	2.145	71.492	0.9424	High	4.87	5.08	2.142	71.394	0.9458	High	4.86
IPI-549	426	432	FKSTSQM	5.83	1	5	6.08	6.15	3.484	69.688	0.8978	Medium	6.17	6.24	3.539	70.788	0.9212	Medium	6.05	6.28	3.549	70.974	0.8763	Medium	6.05	6.28	3.522	70.441	0.9163	Medium	6.05	6.28	3.506	70.123	0.9001	Medium	6.05	6.27	3.483	69.669	0.9121	Medium	6.05	6.28	3.55	71.005	0.8923	Medium	6.05
IPI-549	433	457	VLRRDSRSLEGSPDSGPPLRRAGSL	6.9	4	20	7.16	7.37	11.476	57.379	0.8715	Medium	7.16	7.37	11.822	59.111	0.8812	Medium	7.17	7.38	11.679	58.394	0.8717	Medium	7.16	7.37	11.546	57.728	0.836	Medium	7.16	7.37	11.38	56.901	0.8597	Medium	7.16	7.37	11.406	57.029	0.8688	Medium	7.17	7.37	11.768	58.84	0.8688	Medium	7.16
IPI-549	435	457	RRDSRSLEGSPDSGPPLRRAGSL	6.65	5	18	6.82	7.15	10.408	57.82	0.8098	Medium	6.82	7.15	10.749	59.717	0.8424	Medium	6.82	7.15	10.596	58.868	0.8692	Medium	6.83	7.15	10.499	58.326	0.7914	Medium	6.82	7.15	10.394	57.745	0.8194	Medium	6.82	7.15	10.403	57.794	0.842	Medium	6.83	7.15	10.71	59.503	0.8349	Medium	6.82
IPI-549	491	515	LAPASRHQRRRPFLSGDEDPKASTL	6.95	5	20	7.09	7.26	6.43	32.15	0.857	Medium	7.09	7.26	6.718	33.591	0.8743	Medium	7.09	7.27	6.521	32.606	0.8763	Medium	7.09	7.26	6.73	33.648	0.8484	Medium	7.09	7.26	6.624	33.121	0.8658	Medium	7.09	7.26	6.459	32.294	0.8655	Medium	7.09	7.26	7.176	35.878	0.8783	Medium	7.09
IPI-549	507	515	DEDPKASTL	6.48	1	6	6.72	6.78	2.533	42.214	0.6212	Medium	6.68	6.74	2.635	43.915	0.7116	Medium	6.68	6.74	2.449	40.818	0.5053	Medium	6.68	6.74	2.674	44.559	0.6366	Medium	6.72	6.79	2.707	45.118	0.6805	Medium	6.68	6.73	2.661	44.357	0.6817	Medium	6.68	6.74	2.702	45.035	0.7053	Medium	6.68
IPI-549	537	546	RRLENNRPLL	6.89	3	7	7.1	7.39	2.162	30.888	0.9358	High	7.11	7.39	2.321	33.159	0.9361	High	7.11	7.39	2.261	32.3	0.9377	Medium	7.1	7.39	3.915	55.928	0.9314	High	7.11	7.39	3.974	56.774	0.9326	Medium	7.1	7.39	3.897	55.677	0.9333	High	7.11	7.39	4.681	66.875	0.9368	Medium	7.11
IPI-549	537	549	RRLENNRPLLTRF	8.55	4	10	8.62	8.74	2.401	24.007	0.8712	Medium	8.62	8.74	2.62	26.201	0.8559	Medium	8.63	8.74	2.433	24.332	0.86	Medium	8.62	8.74	4.956	49.559	0.8905	Medium	8.62	8.74	4.93	49.303	0.8604	Medium	8.62	8.75	4.927	49.274	0.8887	Medium	8.62	8.74	6.214	62.139	0.8851	Medium	8.72
IPI-549	550	554	FKLQF	11.52	1	3	11.83	12.01	0.304	10.147	0.8665	Medium	11.82	12.01	0.314	10.451	0.8499	Medium	11.82	12.01	0.374	12.475	0.7362	Medium	11.83	12.01	0.852	28.405	0.874	Medium	11.82	12.01	0.863	28.766	0.8371	Medium	11.83	12.01	0.853	28.431	0.8508	Medium	11.82	12.01	1.199	39.952	0.8379	Medium	11.82
IPI-549	555	593	FYVPVKRSRGTGTPTSPAPRSQTPPLPTDAPRHPGPAEL	7.76	4	27	7.8	7.85	12.252	45.378	0.8681	High	7.8	7.85	12.675	46.944	0.8629	Medium	7.8	7.85	12.521	46.373	0.8151	Medium	7.8	7.85	12.911	47.818	0.8741	High	7.8	7.85	12.827	47.509	0.8694	Medium	7.8	7.85	12.596	46.65	0.869	Medium	7.8	7.85	13.277	49.172	0.869	High	7.8
IPI-549	594	611	GAAPWEESTNDISHYLGM	13.4	2	15	13.57	13.63	6.844	45.629	0.8237	Medium	13.59	13.67	6.994	46.626	0.8558	Medium	13.62	13.75	7.265	48.436	0.8192	Medium	13.62	13.76	7.544	50.291	0.8346	Medium	13.58	13.69	7.799	51.997	0.8182	Medium	13.62	13.76	7.854	52.36	0.8468	Medium	13.62	13.76	9.114	60.76	0.83	Medium	13.62
IPI-549	594	621	GAAPWEESTNDISHYLGMLDPWYERNVL	14.18	3	24	14.27	14.48	7.082	29.509	0.7308	Medium	14.27	14.48	7.164	29.851	0.7107	Medium	14.27	14.48	7.479	31.164	0.7053	Medium	14.27	14.48	9.626	40.108	0.7377	Medium	14.27	14.48	9.142	38.092	0.7384	Medium	14.28	14.49	9.146	38.108	0.7384	Medium	14.27	14.48	12.152	50.633	0.7341	Medium	14.27
[truncated: 174 more rows]
[truncated: 29 more columns]
