# Supplementary material for: Disease-related mutations in PI3Kγ disrupt regulatory C-terminal dynamics and reveal a path to selective inhibitors
Source: eLife. 2021 Mar 4;10:e64691. doi: 10.7554/eLife.64691 (PMC7955810; doi:10.7554/eLife.64691)
Supplement: Figure 4—source data 1. [file elife-64691-fig4-data1.xlsx]

## Sheet: Figure 4_p110g_inhibitors_HDX
						Average % deuterium incorporation
p110g						APO									IPI-549									AZ2									AS-604850									Gedatolisib
S	E	Max D	RT	Z	Sequence	3s	SD	30s	SD	300s	SD	3000s	SD		3s	SD	30s	SD	300s	SD	3000s	SD		3s	SD	30s	SD	300s	SD	3000s	SD		3s	SD	30s	SD	300s	SD	3000s	SD		3s	SD	30s	SD	300s	SD	3000s	SD
6	12	4	8.785	1	YKQPVVL	93.513	0.318086	93.754	0.612452	93.8613	0.671533	92.7353	0.0629153		92.2633	2.09999	94.098	1.6716	93.8247	0.236001	92.7623	0.0698307		92.735	0.326722	93.1617	0.216611	93.7997	0.330082	93.1193	0.770063		92.54	1.10118	93.5553	0.44723	93.3143	0.905791	93.014	0.860626		92.1047	0.504873	93.3907	0.506364	93.6737	1.17812	92.739	0.770669
36	41	3	10.69	1	ELIPIE	1.565	0.298618	2.52767	0.2757	8.88033	0.432662	19.3647	0.464345		1.55033	0.131127	2.1515	0.111016	9.05233	0.451559	20.039	0.415361		1.559	0.0675352	2.441	0.311626	9.171	0.634237	20.127	0.628609		1.75733	0.489367	2.12333	0.324223	8.27633	0.86472	20.0633	0.703062		1.464	0.256287	2.274	0.315625	9.24267	0.407732	19.784	0.646473
36	42	4	13.91	1	ELIPIEF	3.87967	0.661345	3.95567	0.411857	8.84867	1.01487	18.424	1.19577		2.15567	0.525732	2.4625	1.0147	8.22	1.57396	18.369	1.05569		2.066	0.83427	2.659	0.911133	8.23267	0.549212	18.5467	0.236553		2.289	1.18101	5.353	1.11611	8.956	0.737118	18.1243	0.172934		2.38167	0.41304	3.46033	0.787307	8.67767	0.810768	18.5363	0.147649
42	58	13	8.43	3	FVLPTSQRKCKSPETAL	35.074	1.25087	43.7443	1.10573	51.3033	1.26364	57.2093	1.02722		34.2767	0.830399	44.1355	0.835093	50.1457	0.796804	56.102	1.07812		34.8363	1.49055	43.571	0.869849	50.7717	1.47879	56.46	0.634962		35.3113	0.842876	43.201	0.572388	50.365	1.35801	56.0727	0.721621		34.2387	0.807171	43.3847	1.12202	49.9387	0.797339	55.5233	1.35754
42	59	14	9.48	3	FVLPTSQRKCKSPETALL	28.9943	1.87085	37.1843	1.38242	43.1843	2.73818	49.519	2.03836		28.9943	2.87615	36.7475	2.24648	43.43	2.73185	48.4393	2.61206		28.733	2.05269	37.2427	1.61221	43.481	2.53874	49.3593	1.99071		29.186	1.89567	36.9347	1.85569	42.841	2.43749	49.1487	2.21243		28.24	1.46568	36.831	1.89392	42.9393	1.43141	48.4647	2.0113
59	70	10	6.825	2	LHVAGHGNVEQM	15.0443	0.642663	19.649	0.826097	22.9817	0.322348	33.3483	0.749633		15.8873	0.908692	17.862	0.817415	22.8277	1.40945	34.7763	1.06639		14.5103	1.02408	18.8187	0.825207	23.189	0.322559	35.006	0.771757		10.9327	0.72039	19.1207	0.840039	22.355	0.815811	32.6883	1.11673		13.1853	0.973248	19.5603	0.990849	22.917	0.395065	34.2	0.859888
59	72	12	5.98	2	LHVAGHGNVEQMKA	6.13	0.901293	11.0573	1.16338	15.8833	1.72707	35.2277	2.12844		5.264	0.813043	10.209	1.4425	16.4777	1.04384	35.2267	1.84935		5.789	0.671145	10.624	0.70254	15.8887	1.46999	36.222	1.88458		5.221	0.0418688	10.195	1.33866	15.443	1.09498	35.803	1.13491		5.28067	0.788221	10.3963	0.736786	15.8287	1.17715	35.7777	1.67395
60	70	9	5.365	2	HVAGHGNVEQM	7.62333	0.742004	13.7837	0.246419	20.4327	0.463931	35.8873	0.138479		6.62867	0.73809	13.685	0.130108	20.6997	0.210215	35.8257	0.868615		7.189	0.662958	13.519	0.0793032	20.015	0.667339	36.818	0.46432		6.734	1.12794	13.5833	0.144313	19.7187	0.273427	35.862	0.82051		6.99167	0.507425	13.7333	0.585958	20.524	0.298357	36.4127	1.06162
60	74	13	6.07	3	HVAGHGNVEQMKAQV	5.32067	0.661718	9.70867	1.34956	13.54	0.781094	33.4227	1.17596		4.67833	1.17296	8.8475	0.647003	13.9443	0.852082	32.284	1.3685		5.59567	0.438669	8.788	0.598148	13.073	1.42276	32.0467	0.667717		5.634	1.20319	9.60567	1.02503	13.5287	0.89799	31.707	1.33217		5.08033	0.692717	10.286	2.09506	13.5887	0.547116	31.3593	1.04801
60	75	14	8.325	3	HVAGHGNVEQMKAQVW	3.054	0.641028	5.53967	0.759362	9.823	1.76301	25.368	2.47989		2.798	0.753612	5.243	1.10026	9.60667	1.96858	25.2193	2.61277		2.94	0.606842	5.656	0.568478	9.32167	1.43525	25.752	1.92269		2.72	0.438003	5.59867	0.881672	9.13567	1.3512	24.8563	1.30591		2.61367	0.296926	5.42633	0.72316	9.315	1.25761	24.872	1.56571
71	76	4	10.675	2	KAQVWL	1.596	0.386373	1.54033	0.0470567	1.611	0.769374	4.496	0.382266		1.573	0.355881	1.2065	0.328805	1.79667	0.340059	8.42667	0.113778		1.278	0.420857	1.24933	0.429516	2.27267	0.580536	5.41733	1.04655		1.41133	0.226875	1.43233	0.446218	1.73333	0.398924	8.482	0.373304		1.32567	0.179288	1.19733	0.315468	1.85667	0.342626	5.45033	0.789791
77	84	6	6.165	2	RALETSVA	43.1077	1.35655	54.6773	0.746497	64.6703	0.706609	79.2423	1.14938		42.0877	1.16279	54.772	0.956008	64.9403	0.357436	78.1317	0.733595		42.988	0.601808	54.662	0.786607	66.239	0.232523	79.141	0.316792		41.1173	0.980468	53.7977	0.903307	64.776	0.574384	78.9857	1.05273		41.4743	0.760284	54.904	0.730396	64.4283	0.200978	78.9097	0.846561
79	84	4	6.235	1	LETSVA	63.119	1.31377	79.8763	0.506504	86.364	0.764677	84.7717	1.1944		58.988	1.73349	80.4055	0.979343	86.582	0.473786	85.2843	0.495524		62.8057	1.17238	78.7967	0.388575	86.828	0.520441	82.7793	0.0159478		60.617	0.873453	78.531	1.04328	86.19	0.284389	85.75	0.998613		61.1677	1.32259	76.1667	0.642878	85.6393	0.428561	84.727	0.713255
79	86	6	6.18	1	LETSVAAD	65.224	2.55718	78.3343	2.74261	81.0097	3.87378	77.556	2.48231		61.8897	4.22805	78.1595	1.88303	81.0397	2.55308	77.3237	2.16251		65.0367	2.9344	77.2893	3.10338	80.547	2.86964	78.9993	0.786074		61.9603	0.905606	78.3597	2.63811	80.168	2.0424	79.705	4.73211		61.8747	1.78588	76.09	2.2676	80.2867	1.74626	78.202	2.44613
87	99	10	10.44	2	FYHRLGPHHFLLL	4.21467	0.293057	7.635	0.934472	9.90867	0.666683	15.2097	0.626279		3.99767	0.65932	7.1965	0.925603	9.97967	0.34452	14.9637	0.85056		4.11	0.555625	7.68833	0.868792	10.228	0.402337	14.6597	1.24132		3.6	0.248942	7.62933	1.05555	9.39267	1.20545	14.8707	1.24198		3.69833	0.241786	8.019	0.544124	9.843	0.82671	15.2587	0.224972
88	98	8	8.625	4	YHRLGPHHFLL	5.45267	0.254885	11.7763	0.697737	14.019	1.32151	19.7403	1.51255		5.13567	0.87162	10.822	0.688722	14.3313	1.35668	19.1353	1.25479		5.96367	1.04022	10.9433	0.754194	14.0163	1.06332	20.1177	1.41906		5.25467	0.502138	11.3063	1.05149	14.3757	0.616897	19.7263	0.824186		4.87767	0.526606	11.6907	0.668719	13.678	1.03095	19.456	1.05694
88	99	9	10.115	4	YHRLGPHHFLLL	4.974	0.312079	9.11733	0.514783	11.1287	1.28103	17.0497	1.21274		4.54	0.778458	8.845	0.977222	11.5483	1.14621	16.8123	1.09672		4.97233	0.624766	9.20933	0.945237	11.2873	1.26975	17.2697	1.23811		4.47167	0.119776	9.15133	0.96682	11.1247	1.36061	17.2707	0.781489		4.35567	0.345442	9.03867	0.610259	11.1867	0.975948	17.2403	0.563991
100	106	5	6.045	1	YQKKGQW	34.789	0.706911	53.9917	0.939799	60.6647	1.08657	62.7153	0.537142		33.3027	1.36258	55.981	0.118794	61.2503	0.60777	62.5653	0.123346		34.203	0.329169	54.29	0.844455	60.5287	0.573756	63.0093	0.285791		33.5237	1.09126	53.7207	0.738513	60.0607	0.400926	63.2117	0.723488		33.2897	1.13084	54.6433	1.27402	60.3543	0.10323	62.9517	0.808321
107	113	5	9.085	1	YEIYDKY	27.8717	0.723944	43.5723	0.2004	56.8557	0.424124	58.781	1.12612		27.4067	1.23496	44.038	0.527502	56.413	1.12484	58.1973	0.599694		28.0783	0.883124	43.802	0.217191	56.9207	0.344234	59.0487	0.594544		27.491	1.47577	44.4187	0.702741	56.5597	0.785666	59.4597	0.608572		27.516	0.980566	43.5103	1.16619	56.475	0.596014	57.7487	0.909216
107	118	10	9.445	2	YEIYDKYQVVQT	13.7643	0.634949	22.339	0.626677	35.2283	0.928908	55.7423	1.6128		13.4183	1.06235	22.164	0.591141	35.844	0.336309	54.6497	0.849319		14.0257	0.783412	22.276	0.595358	35.362	0.828683	55.908	0.885383		13.1747	0.243176	22.4937	0.832849	34.6167	1.17185	55.656	0.94152		13.1183	0.891413	22.251	0.701364	34.9753	0.689387	55.3113	0.54331
107	121	13	11.24	2	YEIYDKYQVVQTLDC	19.6583	1.10076	26.886	0.864116	37.8867	0.220623	52.6493	0.379074		19.9523	1.2023	26.2995	0.529623	37.4717	1.17347	52.5613	1.12301		19.432	1.26801	26.3303	1.30061	36.727	0.985694	52.85	0.707477		18.912	0.878929	25.3877	0.749842	36.4563	0.946537	53.3543	0.448525		18.638	0.68343	25.1937	1.21266	36.7533	0.396838	53.131	0.525071
114	119	4	8.225	1	QVVQTL	1.651	0.196517	2.26067	0.4769	5.06733	1.27747	31.5477	0.656998		1.57533	0.244625	1.461	0.156978	5.58467	0.307607	32.5507	0.682671		1.70767	0.271964	1.69567	0.0380832	5.63833	1.16168	32.8427	0.190421		1.79033	0.39788	2.00067	0.850319	4.46533	0.491863	31.325	0.618549		1.59433	0.200101	1.68267	0.353142	5.14533	0.209619	32.784	0.96158
122	137	13	7.695	4	LRYWKATHRSPGQIHL	5.09233	0.986512	12.0333	1.90596	22.6623	3.12102	32.3293	1.93701		4.91767	1.28788	12.293	2.18779	22.5467	2.89693	30.455	3.12017		4.99833	1.20846	12.1053	1.62609	22.5327	2.60458	31.271	3.73319		4.90067	1.162	12.178	1.96124	21.4707	2.81442	31.6553	3.09911		4.755	0.88431	12.2987	2.21231	21.7573	2.45419	30.9643	2.95528
125	137	10	6.845	3	WKATHRSPGQIHL	8.44067	0.625455	16.9873	2.06428	21.192	0.535149	26.4547	0.672204		8.68233	1.76837	16.4695	0.549422	21.0623	0.979253	25.701	1.27174		8.503	1.26552	15.96	0.226053	20.5033	1.53055	25.8227	0.802048		8.17767	1.49598	15.9233	0.733657	20.8257	0.256923	25.5087	0.550009		8.19067	2.7466	16.679	1.78772	20.989	0.855586	26.274	0.384945
138	149	8	4.18	2	VQRHPPSEESQA	42.406	1.17105	52.503	0.624405	64.71	0.757689	65.262	0.949861		41.5353	1.34614	52.9205	0.586192	64.6933	0.458275	66.938	0.653666		41.8647	0.6175	51.8227	0.445387	64.5817	1.08236	65.3063	0.39983		43.6137	1.13619	52.5953	0.473592	64.853	1.17285	65.5893	1.04822		41.733	0.316596	52.881	1.48019	64.389	0.820358	64.9567	0.706123
138	150	9	6.745	2	VQRHPPSEESQAF	33.261	0.667018	46.423	0.285175	60.2003	1.65524	59.5043	0.799978		33.155	1.39434	47.9735	0.6965	58.9203	0.899158	59.7083	0.91022		32.6873	0.859117	45.8153	0.736948	59.5507	2.23748	61.365	0.759512		33.037	1.32692	45.9683	1.27024	58.3687	1.55039	59.4273	1.96858		32.2853	0.978739	45.402	0.840623	59.0863	1.59196	61.0323	1.55524
138	157	16	9.75	4	VQRHPPSEESQAFQRQLTAL	12.8013	0.966473	21.499	0.771629	34.8693	1.97351	49.1093	5.17685		12.2653	1.50897	21.9435	1.33714	35.5477	2.31948	49.7923	1.30236		12.324	0.922651	21.2173	0.986185	34.957	1.62594	48.663	2.35795		12.66	1.39294	21.5137	0.950403	34.8503	2.09754	49.6717	1.9887		11.972	0.738123	21.4493	1.18822	35.0843	1.0752	49.7967	1.66173
150	157	6	9.095	2	FQRQLTAL	3.08833	0.116294	5.55367	0.447165	18.9877	0.502	42.7297	0.540742		2.98333	0.426071	6.2585	0.470226	19.4233	0.135803	43.2643	0.472991		2.73333	0.134537	4.92167	0.663108	17.359	0.196489	41.075	0.832088		3.018	0.180801	6.007	0.187518	18.9113	0.153871	43.1717	0.519252		2.56933	0.10814	5.577	0.224401	19.3917	0.409049	43.9777	1.15007
151	157	5	8.07	2	QRQLTAL	3.07233	0.146609	6.469	0.484978	21.086	1.07584	40.772	0.307443		3.136	0.385315	6.783	0.291328	21.2023	0.0869042	41.8273	0.667995		2.86067	0.437829	5.53433	0.538138	19.1977	0.463832	39.3803	0.466083		3.03433	0.288391	6.63133	0.148894	20.9043	0.348138	41.6697	0.374919		2.48067	0.0879564	6.475	0.384782	21.1707	0.874421	42.9303	1.03153
158	164	5	8.2	1	IGYDVTD	15.9463	0.6764	23.597	1.02051	48.4343	1.35002	66.3167	1.46601		15.717	0.709594	22.3355	0.331633	47.9537	1.10915	66.6963	0.907394		15.646	0.447132	22.8593	0.51758	47.8603	0.737451	67.2777	0.872172		15.885	0.552316	23.1923	0.381699	47.3933	0.449766	67.0523	0.908608		15.166	0.564726	23.043	0.414754	48.0007	0.484958	66.3627	0.809262
158	173	14	10.295	2	IGYDVTDVSNVHDDEL	24.602	1.21449	34.886	1.19738	44.969	1.89396	50.5857	2.34192		23.3877	2.12211	33.7235	1.31734	45.1417	1.21263	49.2697	1.67363		24.5367	0.896344	34.0967	1.87402	45.2547	1.72325	51.5657	0.679748		24.338	2.21585	34.259	0.854244	44.7873	0.99114	51.49	0.230983		23.6763	1.47806	34.352	1.55998	45.0963	0.819083	50.2967	1.61628
158	174	15	9.895	2	IGYDVTDVSNVHDDELE	23.0763	1.50411	32.344	1.05293	43.4837	1.85526	48.8217	5.88094		21.7477	2.35991	31.5885	1.03874	43.1087	2.07363	48.9513	2.05851		22.7517	0.708904	31.0857	1.89209	43.145	1.92528	49.123	2.98842		22.1657	2.76806	31.83	0.966076	42.553	2.11428	50.3147	1.86817		21.9997	2.02498	31.614	0.994	42.7623	1.15586	49.5727	1.33106
161	174	12	8.42	2	DVTDVSNVHDDELE	28.0003	1.13122	37.14	1.21381	45.7387	1.08438	52.0063	1.03154		26.7003	0.637672	37.342	0.793374	46.652	1.16057	52.9043	0.805123		27.1797	0.414652	37.4043	0.806001	45.3903	0.841691	53.4177	1.09615		27.4403	0.533822	37.1623	0.380161	46.9057	0.60856	53.1977	0.99339		27.269	0.377694	37.6237	0.663141	47.3443	0.12752	53.402	0.352041
165	175	9	10.55	2	VSNVHDDELEF	14.2143	0.793807	24.046	0.364412	30.3053	0.402301	34.2673	0.568318		13.0303	1.06881	23.958	0.436992	30.9033	1.06842	34.3447	0.955073		13.901	0.412578	24.2477	0.660338	31.3	0.761374	34.763	0.478197		13.0043	0.29045	24.021	0.24597	30.6963	0.740164	34.226	0.965442		13.1587	0.668012	24.321	0.120403	30.8283	0.649873	34.5923	0.457242
174	182	7	7.035	2	EFTRRGLVT	3.168	0.28537	3.88133	0.0998465	10.0413	0.459174	16.018	0.165855		2.76233	0.294619	3.6135	0.458912	9.66767	0.415827	16.2253	0.715155		2.82367	0.110006	3.915	0.500201	9.668	0.396369	16.2287	0.251933		3.25833	0.253086	3.70433	0.133986	9.27733	0.497041	16.193	0.213382		2.589	0.0854576	4.04867	0.276692	9.74433	0.76279	16.5917	0.152579
174	185	9	7.94	3	EFTRRGLVTPRM	2.266	0.42389	2.74167	0.839474	7.23733	0.444963	12.1387	0.403175		1.32833	0.847479	2.829	0.205061	7.17067	0.191286	12.415	0.773762		1.74933	0.627468	2.50767	0.587837	6.99133	0.389237	11.839	0.457566		1.65367	0.745382	2.951	0.351915	7.04167	0.721113	12.0533	0.469174		1.98533	0.576543	2.52333	0.574317	7.55467	0.590427	11.9137	0.401328
174	187	11	7.59	2	EFTRRGLVTPRMAE	3.18433	0.545813	3.82033	0.481502	8.791	0.439969	19.983	0.0771492		3.692	1.25203	3.2555	0.331633	9.17067	0.517962	20.1723	0.99916		3.03867	0.249658	4.26333	0.525578	7.957	0.344155	19.1233	0.318051		3.16733	0.302186	3.99933	0.188908	8.665	0.18268	19.415	0.981778		2.713	0.267524	3.378	0.717253	9.13633	0.330051	22.0567	0.983394
174	195	18	8.29	5	EFTRRGLVTPRMAEVASRDPKL	6.968	0.348968	10.507	0.517406	20.2217	1.174	31.4967	4.07681		6.45967	0.646502	10.3825	0.604576	19.8287	1.44326	31.6613	2.29464		6.636	0.22795	10.367	1.11646	18.2493	1.31839	30.757	1.89286		6.657	0.646897	10.3847	0.44938	18.8183	1.04796	31.496	2.02433		5.90167	0.417493	10.4933	0.808426	18.9437	0.304344	31.29	1.55339
175	182	6	6.235	2	FTRRGLVT	3.74367	0.144756	4.35333	0.585335	10.9193	0.537502	18.8223	0.401642		3.42967	0.878614	4.108	0.2885	11.5203	0.229803	18.515	0.223578		3.37	0.103966	4.62633	0.398914	11.1673	0.211003	18.805	0.32575		3.447	0.456626	3.91667	0.352103	10.644	0.375851	18.8943	0.701206		3.16067	0.241711	4.61867	0.488846	11.462	0.718645	18.594	0.669957
176	182	5	4.905	2	TRRGLVT	3.66533	0.625946	4.21267	0.293682	12.5963	0.0905778	21.8447	0.536004		3.371	0.275647	4.665	0.411536	12.5833	0.626362	22.0813	0.277794		3.423	0.381529	4.576	0.378303	12.506	0.142664	21.4213	0.119571		3.31967	0.0670398	4.18933	0.213657	12.1937	0.458886	22.217	0.21844		3.30367	0.355901	4.67633	0.641456	13.2533	0.929463	21.8293	0.722597
176	185	7	6.55	2	TRRGLVTPRM	3.62233	0.524326	4.8	0.54435	9.619	0.376845	17.1463	0.878656		3.32033	0.818558	4.083	0.398808	9.7	0.481912	16.5203	0.22892		3.14833	0.341565	4.073	0.754924	9.551	0.478292	16.201	0.211171		3.064	0.363819	4.13633	0.684801	9.74833	0.872121	16.34	0.175348		3.24867	0.449104	4.11533	0.221895	10.5077	0.822329	16.759	0.91665
183	195	10	6.825	3	PRMAEVASRDPKL	13.452	0.651362	19.296	0.0716868	33.3367	0.834717	51.493	2.49181		12.556	0.443361	19.82	0.575585	33.5103	0.516239	52.4787	0.787163		13.597	1.72828	18.7723	0.663298	31.1917	0.427563	50.7233	0.547955		12.516	0.0350286	19.2477	0.203323	32.1013	0.0881211	52.039	0.482134		11.7607	0.439574	18.761	0.20362	31.7603	0.380849	50.727	0.934361
186	195	7	6.075	2	AEVASRDPKL	18.7977	0.791835	26.856	0.168226	43.589	0.54815	59.4253	0.284788		17.8817	0.895447	27.154	0.712764	44.352	0.348527	59.5663	0.333731		17.6903	0.544898	26.4377	0.445603	41.493	0.664647	58.9043	0.292791		17.4383	0.481975	26.2963	0.169992	42.5977	0.107221	59.4567	0.44243		16.772	0.716695	26.7147	0.409234	42.0597	0.370002	58.4757	1.09399
188	195	5	5.4	2	VASRDPKL	25.4813	1.02983	36.1917	0.602586	50.054	0.815147	62.0767	0.124114		24.1027	1.08966	35.8715	0.198697	51.135	0.251722	62.74	0.893779		23.877	0.830627	34.596	0.437878	48.8503	0.690406	61.1427	0.125349		24.0177	0.883319	35.2147	0.427322	49.739	0.09134	62.101	0.506671		23.2157	1.42855	35.0023	1.02512	49.2353	0.467442	60.8767	1.30465
196	211	11	11.82	3	YAMHPWVTSKPLPEYL	29.2453	0.567977	38.4667	0.785452	51.8903	1.1679	59.916	1.18611		28.9523	1.24712	38.942	0.435578	52.1713	0.95362	60.9213	1.37785		28.1827	0.778551	38.1157	1.01327	49.0763	0.815846	60.518	1.18994		29.086	0.978621	38.594	0.802975	52.1107	1.06503	61.0447	0.909492		27.455	0.600663	37.925	0.589573	50.7383	0.816905	60.658	1.26801
212	221	8	10.485	2	WKKIANNCIF	26.2423	0.903558	40.2057	0.866696	59.462	0.680517	63.518	1.31568		25.4887	1.84537	40.224	0.684479	59.698	0.826294	63.2747	1.24746		25.365	1.29744	38.5097	0.795491	58.9323	1.28166	63.461	0.668969		25.998	1.01076	40.1467	1.25431	59.213	0.956922	64.3963	0.641821		24.3303	0.659016	39.392	1.26871	59.249	0.802165	63.3997	1.0545
222	232	9	4.81	2	IVIHRSTTSQT	34.3437	1.12338	36.4253	0.99223	38.45	1.1775	43.532	0.107084		33.7537	0.856473	36.009	0.142836	38.995	0.689796	44.2027	0.951747		34.075	0.667099	36.499	0.475934	39.6047	0.404171	43.6297	0.0450814		34.9953	0.876731	35.8303	0.554553	39.1163	0.785953	43.821	1.04162		33.2257	1.12788	36.426	0.624493	38.5937	0.167479	42.7343	0.875852
223	233	9	4.78	3	VIHRSTTSQTI	36.9167	0.235901	36.6063	0.633745	38.1393	0.246691	43.652	0.249054		36.733	1.46924	36.0685	0.0714178	39.064	0.970855	44.2527	0.765298		34.2423	1.05544	36.3797	0.527258	39.2703	0.928087	43.883	0.888597		36.286	0.418771	36.037	0.594147	38.1327	1.24287	43.867	0.909346		35.491	0.213871	36.3137	1.20419	38.4277	0.794073	44.284	0.768945
232	245	10	10.125	2	TIKVSPDDTPGAIL	13.97	0.245506	21.9577	0.259145	31.517	0.400854	41.771	0.66585		13.4093	0.825934	21.6965	0.477297	30.933	0.498826	41.1993	0.0735142		14.105	0.489534	23.0817	0.63056	32.0057	0.636442	42.6523	0.591043		14.3127	0.906092	20.8587	0.457674	30.6673	0.635655	41.7323	0.763503		13.0013	0.388183	21.4197	0.859314	31.1853	0.262413	41.6707	0.286395
233	245	9	10.025	2	IKVSPDDTPGAIL	11.2607	0.465085	14.4493	0.261567	24.383	0.661862	36.3903	1.20032		10.9957	0.349094	14.506	0.274357	24.864	0.662903	36.5217	0.757443		10.7413	0.401024	14.803	0.331107	24.7537	0.469319	37.2913	0.452913		11.0353	0.152346	14.4453	0.151764	24.2613	0.748014	36.7627	0.829237		10.2893	0.252892	14.4193	0.41796	24.4477	0.194454	36.364	0.452
249	269	18	7.53	4	FTKMAKKKSLMDIPESQSEQD	55.0237	1.11009	61.649	0.851162	62.2513	0.341418	60.4887	0.890114		56.5123	1.304	60.391	1.42836	60.8853	1.07254	60.0943	1.0967		54.304	0.74734	60.3097	0.81018	60.388	0.963457	60.171	0.768173		56.5813	0.526101	60.362	1.18026	60.3937	1.05345	60.8797	1.0955		54.173	0.653872	58.1473	0.790381	60.4017	1.027	58.5373	0.441423
270	278	7	8.955	3	FVLRVCGRD	4.26433	0.718159	5.53733	0.549008	12.7303	0.679524	18.299	1.39803		4.11267	0.483624	5.3445	0.785596	12.6203	0.996535	17.985	0.908134		4.21067	0.886714	6.91367	0.483083	14.9463	1.14332	16.672	1.13012		4.34067	0.479259	5.06133	0.430708	11.4963	0.58576	19.1167	0.890315		3.78333	0.296989	5.39267	1.00224	12.213	1.35125	17.4473	1.14902
270	281	10	11.155	3	FVLRVCGRDEYL	2.30333	0.412759	3.241	0.492959	7.201	0.466334	10.615	0.663563		2.18567	0.254115	3.227	0.195161	7.57967	0.909061	10.3937	0.918881		2.211	0.166694	4.41433	0.171074	8.048	0.981978	9.741	0.57657		2.56	0.980875	2.99633	0.314665	7.342	0.729612	11.122	0.413961		2.02967	0.292739	3.248	0.665351	7.63333	0.423136	10.1987	0.765658
282	291	7	8.045	1	VGETPIKNFQ	10.1297	0.11185	10.54	0.477691	11.2497	0.391154	19.8663	0.162814		9.856	0.0173494	10.3385	0.925603	10.9793	0.522063	19.6773	0.463343		9.67167	0.069515	10.0943	0.415286	11.0157	0.606553	20.4343	1.25689		9.89533	0.538786	10.2767	0.125958	11.2687	0.350563	19.5343	0.225868		9.47333	0.562459	9.85867	0.512521	11.4303	0.694244	19.9087	0.265152
282	291	7	8.095	2	VGETPIKNFQ	9.782	0.601913	9.491	0.279802	10.7897	0.0760022	19.341	0.263091		9.35833	0.213066	9.461	0.61094	10.6193	0.35643	19.2637	0.34126		9.56333	0.57247	9.80633	0.211178	10.7157	0.371594	19.686	0.150921		9.32367	0.201222	9.647	0.243785	10.479	0.220742	19.5483	0.549859		9.54867	0.283373	9.45967	0.369239	10.7643	0.794403	19.127	0.133787
282	307	23	11.305	4	VGETPIKNFQWVRHCLKNGEEIHVVL	5.82567	0.61084	15.056	0.866303	20.4833	1.03102	23.3883	0.661091		5.398	0.611186	15.268	0.612354	20.4997	1.09834	23.2783	1.05748		5.48533	0.436969	14.8377	0.737714	21.1557	1.15108	23.022	1.55811		5.313	0.222394	15.255	0.974694	20.6757	1.21286	23.118	1.2131		5.14533	0.625022	14.3233	0.736598	21.1647	0.663176	23.2577	0.664574
292	302	9	5.505	3	WVRHCLKNGEE	8.74533	0.828337	22.4533	0.793243	25.2493	0.83893	25.9137	0.974478		7.63533	1.11037	22.4175	0.0176777	25.351	0.575042	25.938	1.04239		8.365	0.569169	20.9927	0.385173	25.4077	0.777402	26.2323	0.440019		7.88167	0.263502	22.102	0.387578	24.8993	0.709053	25.991	0.818398		7.38533	0.680357	22.0773	0.93902	25.0237	0.477066	26.0917	0.971352
292	307	14	9	4	WVRHCLKNGEEIHVVL	6.087	1.10709	17.3197	1.9722	23.5267	3.04734	24.094	3.09782		5.34233	1.4963	16.802	2.34335	23.7203	3.21407	23.221	2.39338		5.554	0.851095	16.8583	1.61123	23.7343	2.79902	23.913	2.67935		5.29933	0.440534	17.07	1.70878	23.472	2.53737	24.3813	2.05607		4.85667	0.722645	16.7267	1.85243	23.2447	2.18499	23.3283	2.25815
308	315	3	8.4	1	DTPPDPAL	24.087	0.6199	45.9833	0.564076	58.4407	1.02114	68.406	0.921504		22.3493	1.12704	46.7765	1.21834	58.9627	0.651428	69.1883	0.184023		23.5493	0.990403	45.3707	0.690833	58.816	0.960925	69.2623	0.141779		22.012	0.349587	45.5733	0.76399	59.1497	0.671084	69.207	0.243317		21.33	1.43228	45.1773	0.0777196	56.2507	1.0596	68.7087	0.318048
316	335	17	12.425	2	DEVRKEEWPLVDDCTGVTGY	46.3347	1.04743	51.2067	0.412553	56.555	0.562285	61.54	0.164435		47.2667	1.06268	51.38	0.534573	56.8543	0.178158	61.6303	0.658426		46.882	0.519982	50.7863	0.643469	57.4367	0.905816	62.1297	0.332013		46.2447	0.756754	50.5713	1.27126	56.1477	0.707857	61.2253	1.21591		45.7857	1.19137	50.5167	0.822646	56.7407	0.578664	61.7423	0.543376
316	339	21	11.995	3	DEVRKEEWPLVDDCTGVTGYHEQL	43.343	0.204184	48.228	0.481686	51.6443	0.633555	56.185	0.758237		44.6947	0.414116	47.897	0.168291	51.346	0.66896	56.294	0.745962		43.6577	1.42475	48.9637	1.28053	52.693	1.12302	56.7113	1.43294		43.6633	0.435309	47.559	0.965312	52.8663	0.400451	57.5737	0.96256		42.8687	0.9655	48.2127	0.496814	53.0817	0.938256	56.9457	0.828991
328	339	10	8.905	2	DCTGVTGYHEQL	63.328	1.26588	66.7637	0.0905226	67.7	1.22408	66.8623	1.68947		63.9597	2.12163	66.2315	0.239709	67.4943	1.5515	65.787	2.68217		63.4583	1.79307	66.7967	0.399853	68.0667	1.60552	66.8653	0.451549		62.601	1.11722	66.333	0.464432	67.1943	1.60736	68.4743	1.64817		64.011	0.406169	66.6303	1.07155	67.692	0.445386	67.1097	1.48086
336	350	13	7.62	3	HEQLTIHGKDHESVF	36.6183	3.50748	40.472	4.18996	41.2657	5.2816	41.025	5.82377		36.6917	5.10467	39.8095	4.17547	40.7137	5.03725	39.834	4.24774		36.455	3.76483	40.2233	4.14951	40.7873	4.79322	40.9187	4.28135		35.355	1.99816	40.1537	4.25029	40.0663	4.21168	40.7753	3.80616		36.4153	4.21153	39.3077	4.22619	39.9007	3.77747	39.9757	4.25216
340	350	9	6.81	2	TIHGKDHESVF	26.491	0.422465	28.2573	0.784606	27.5887	1.22672	27.463	0.913634		25.8597	1.33688	28.1325	0.542351	27.873	0.695052	27.4157	0.768063		26.373	0.829412	27.506	0.500895	27.7997	0.877209	27.8397	0.339012		26.381	0.172096	27.555	0.483869	27.6873	0.744243	27.7807	0.390871		26.5727	1.16025	27.394	0.818299	27.4337	0.56042	27.8403	0.887483
355	379	21	10.64	5	WDCDRKFRVKIRGIDIPVLPRNTDL	16.6327	1.04326	20.465	0.711332	27.157	1.49695	35.8817	1.63272		15.5213	1.37737	20.788	0.741048	27.093	0.980364	36.8013	0.484706		15.9217	0.66528	20.6823	0.533277	28.2113	0.769938	35.4873	1.58282		15.8463	0.69684	20.0603	1.07808	26.9703	1.52131	35.1813	1.04209		15.0587	0.624866	20.4573	0.831677	27.337	1.33712	35.205	1.19123
370	379	7	9.58	2	IPVLPRNTDL	58.0423	0.359429	67.7077	1.31385	78.6503	0.619323	79.729	0.0397366		54.879	1.36488	67.707	0.722663	79.377	0.375621	79.159	0.311896		56.4483	0.0636579	64.3847	0.646279	79.146	0.258529	79.813	0.912415		55.6127	0.366635	64.414	1.71852	79.0857	0.283729	79.794	0.513818		55.2723	1.3193	63.6263	0.254759	77.96	0.227921	79.0437	0.395284
382	394	11	9.18	2	FVEANIQHGQQVL	13.1957	0.59117	18.552	0.611362	22.2707	0.189716	32.1533	0.101658		11.652	0.734719	19.011	0.311127	22.1703	0.10112	31.788	0.523184		13.3377	0.546	18.8007	0.670616	22.6453	0.150869	32.173	0.530393		11.998	0.378453	18.3397	1.45401	21.9527	0.344596	32.087	0.459795		11.1727	1.01968	18.563	0.837082	22.1477	0.769618	31.3047	0.384807
383	394	10	8.01	2	VEANIQHGQQVL	14.194	0.628193	20.0163	0.695276	25.3673	0.0285015	36.0973	0.339825		12.7853	0.482691	20.835	0.282843	25.0323	0.296126	35.8313	0.170741		14.4503	0.440334	19.9737	0.931155	25.7053	0.282095	36.4227	0.114286		12.9223	0.591531	19.6033	1.24683	24.7247	0.550092	36.181	0.188237		12.128	1.03479	19.3193	1.24833	25.1513	0.198165	35.4653	0.0935539
395	407	9	5.715	3	CQRRTSPKPFTEE	12.851	0.426089	19.4643	0.449502	30.9073	1.0995	37.7407	0.639284		11.3407	1.03036	19.913	0.166877	31.6287	0.373516	37.6587	0.910232		12.5923	0.966842	19.7767	0.572313	31.2637	1.09813	38.0237	0.774827		11.045	1.07789	19.103	0.472259	30.6053	0.493082	37.9993	0.596426		11.554	1.18441	19.5093	0.122075	31.114	0.280626	37.618	0.967717
417	428	9	8.245	2	SIKIKDLPKGAL	3.89767	0.393792	8.635	0.426824	20.333	0.220701	37.1083	0.786756		3.393	0.334215	8.2445	0.564978	18.9177	0.517133	35.6567	0.129311		3.90833	0.238548	9.58167	0.295172	22.0593	0.201684	39.2813	0.4237		3.61033	0.446307	7.512	0.141715	18.4783	0.243644	35.168	0.215195		3.419	0.367768	10.1893	0.32074	22.4797	0.619382	38.7457	0.305873
463	468	4	13.365	1	YVNLLL	2.511	0.266321	4.69433	0.384131	10.028	0.506603	23.7863	1.171		2.33567	0.342769	4.3275	0.22981	9.91167	0.736271	24.1127	1.08249		1.61567	1.04853	3.00767	1.47208	10.42	0.994752	23.8577	0.860359		2.57367	0.79899	2.482	1.03433	10.2433	0.899918	25.0043	1.20316		4.19867	0.87575	4.69067	0.552209	10.3053	1.20685	24.796	1.03646
467	479	11	9.08	4	LLIDHRFLLRRGE	6.525	0.26814	14.48	0.249487	22.389	0.854325	27.5093	1.16547		5.71133	0.994935	14.447	0.127279	22.3483	1.06698	26.7703	0.938592		6.227	0.658654	14.9467	0.486554	22.6867	1.07626	28.4283	0.968796		5.71433	0.466245	14.136	0.558227	22.016	0.950914	27.0117	0.594601		5.743	0.517226	14.394	0.935757	22.9597	0.512767	30.85	0.756793
467	480	12	9.625	4	LLIDHRFLLRRGEY	5.94	0.530144	13.6153	0.625672	20.523	1.19998	25.2597	1.29809		5.239	0.911823	13.466	0.801859	20.6583	1.15574	24.5797	1.17781		5.64867	0.622945	14.013	1.23498	20.6897	1.2976	25.9643	1.32699		5.18167	0.159202	13.5063	1.47311	20.4777	0.879771	24.778	1.09429		5.35	0.457197	13.9643	0.901539	21.0087	0.909683	28.2967	0.962042
485	497	11	9.905	2	WQISGKGEDQGSF	57.9067	4.31455	60.678	3.39091	67.5123	6.2314	68.3583	4.23071		56.3527	4.62262	59.831	4.995	68.7763	5.12422	68.4957	3.74344		58.2623	3.36482	61.6713	5.94818	69.4627	4.68964	68.9963	4.72747		55.701	4.78419	59.0527	3.84309	69.0137	5.15514	69.808	3.09126		55.6973	3.44953	60.2007	5.0966	68.7667	3.95878	67.999	3.9054
498	515	15	6.1	3	NADKLTSATNPDKENSMS	18.9167	0.778481	28.931	0.463728	38.4433	0.425607	53.319	0.491733		17.507	0.793937	29.302	0.442649	38.139	0.0251595	52.0303	0.187068		19.0423	0.332978	29.4433	0.664025	40.7687	0.739689	60.8597	0.158774		17.468	0.66955	28.0543	0.909039	36.9983	0.287639	51.4847	0.126532		17.5533	1.08922	29.818	0.720053	44.682	0.313479	63.0563	0.708069
498	517	17	7.385	3	NADKLTSATNPDKENSMSIS	16.2543	1.23619	23.152	0.349973	32.6013	0.966177	45.3737	1.43005		14.6583	1.73934	23.7715	0.0799031	32.1097	1.12474	43.6033	1.31777		15.9113	1.51988	24.4683	1.79864	34.2787	1.34377	51.1597	1.00152		14.665	1.22548	22.988	0.638961	31.3227	0.748787	42.1397	3.26352		14.713	1.36116	24.716	1.21817	37.7867	0.391072	53.4457	0.702647
520	551	24	8.96	4	LDNYCHPIALPKHQPTPDPEGDRVRAEMPNQL	49.8783	0.408999	55.6433	0.820082	58.8097	1.18716	58.379	1.16326		48.4117	1.38561	55.8335	0.57912	58.763	1.31212	58.13	0.788203		49.6207	0.71407	55.9653	0.62538	58.934	1.04432	58.6013	1.06936		48.5867	1.09777	55.897	1.09254	58.5863	1.12097	58.8493	0.846932		49.1787	0.463987	56.0543	0.711641	58.269	0.477086	58.1043	0.677862
523	551	21	8.455	5	YCHPIALPKHQPTPDPEGDRVRAEMPNQL	50.9423	1.1439	56.994	1.2772	60.837	1.00743	59.803	1.38863		53.3237	0.830093	57.491	0.0452548	59.517	1.10827	59.4197	1.16476		50.7837	0.0815128	57.359	0.679891	60.143	1.18228	59.9837	1.10361		50.7377	0.999003	60.0237	1.11114	60.638	0.420251	60.1373	1.14992		49.7657	0.673057	58.335	1.14051	59.546	0.823566	59.3753	0.971077
557	573	13	10.69	2	AIIATDPLNPLTAEDKE	37.26	0.0915041	54.1787	0.684764	72.623	0.538279	75.6627	0.467861		35.788	1.13705	51.109	0.854185	71.729	0.412004	75.4303	0.389216		42.1813	1.13616	60.2337	0.517171	74.999	0.320036	75.5433	0.24956		31.326	1.31846	49.2857	0.761035	70.459	1.19834	75.4387	0.563182		38.4617	0.184199	61.0847	0.715515	74.3967	0.443983	75.2543	0.340059
557	578	18	13.715	3	AIIATDPLNPLTAEDKELLWHF	27.014	1.05744	43.967	1.26077	66.2357	0.898506	72.892	0.804083		24.556	0.863817	40.8025	1.2042	64.6307	1.19726	72.946	0.906196		31.7567	1.13182	50.1943	0.228154	71.3467	0.572194	73.7807	0.175432		26.4503	0.791863	40.3597	0.617454	62.815	1.1264	72.5423	0.178752		26.6423	0.78575	51.9	1.329	70.028	1.05613	73.0343	0.314379
558	571	10	11.465	1	IIATDPLNPLTAED	43.836	0.632312	58.6963	0.922636	73.644	0.836873	74.8413	0.301863		42.5307	0.822258	57.174	0.19799	73.7297	0.516568	75.032	0.919675		46.3743	0.419325	66.2577	0.944884	74.7783	1.55158	75.0593	0.92245		37.373	1.37772	54.9397	0.807225	73.8767	1.04645	75.2503	0.307149		44.748	0.371348	64.04	0.311934	74.799	0.813892	74.5853	0.524881
558	573	12	10.535	2	IIATDPLNPLTAEDKE	38.566	0.489617	53.4217	0.546875	70.6823	0.342952	72.2343	0.432962		36.0543	1.71896	52.093	1.14834	69.942	0.30986	71.84	1.39628		41.9707	1.25566	60.6717	0.270141	72.3227	0.209987	72.6663	1.06536		35.4457	1.53443	48.577	0.596717	68.6163	0.777086	72.214	0.272666		40.4907	1.35416	61.066	0.747922	72.3	0.775963	72.0053	0.93215
558	578	17	13.725	3	IIATDPLNPLTAEDKELLWHF	27.1413	0.67049	42.2013	0.684648	63.669	1.11895	69.034	0.603625		24.689	0.590516	40.021	0.393151	62.286	0.959939	68.8803	0.962232		31.751	1.11996	49.4483	0.955254	67.5217	0.881148	69.5917	0.391619		25.5797	1.82322	37.76	0.756	60.381	0.926908	68.7233	0.569005		27.9673	0.0236714	49.5367	0.258001	66.1847	0.763414	69.2563	0.397826
559	573	11	9.885	2	IATDPLNPLTAEDKE	44.0957	0.169359	57.2537	2.04102	73.246	1.75516	76.1017	2.57999		40.7587	2.48128	55.452	1.53866	73.687	1.93231	74.2637	1.24224		47.1013	1.71529	61.5237	3.63348	74.326	2.76826	76.9927	0.992958		40.6867	4.86221	54.9403	2.24582	69.279	1.64236	70.6513	7.95999		43.868	0.602716	66.1763	1.62385	74.953	0.97054	76.74	1.06043
574	578	3	13.14	2	LLWHF	14.746	0.739306	28.3443	0.58698	52.2823	0.815311	59.0887	0.989482		11.409	0.895921	24.914	0.830143	50.826	0.450348	59.3673	1.12912		16.502	0.948785	37.0183	0.465603	58.2127	1.14001	60.6487	0.747236		8.554	1.07994	21.8183	0.784541	47.406	1.63273	58.8707	0.955323		14.3777	0.298296	36.4737	0.924015	57.049	1.13236	58.84	1.02701
579	592	10	6.42	4	RYESLKHPKAYPKL	18.755	0.947071	35.628	1.02849	52.7123	1.3448	53.5057	0.958928		18.569	0.564272	33.033	1.30673	52.7093	0.647217	53.0823	1.05022		24.4153	1.45553	44.3107	1.11904	53.9607	0.746866	53.9703	0.893376		15.3727	1.29232	31.0803	0.581607	51.272	0.624757	53.8413	0.491286		23.8407	0.32108	45.2393	1.06749	53.3083	0.473006	53.778	1.18129
602	607	4	4.645	1	EIVAKT	19.6133	1.11706	43.143	0.559386	81.9143	0.631068	86.156	1.44483		22.434	1.81919	40.705	0.0410122	80.7933	0.124709	84.192	1.27382		35.9413	0.0811193	61.2373	0.459102	86.273	0.672501	86.331	0.813577		17.2	0.855686	39.6463	0.123759	79.273	0.820237	86.6543	1.16718		28.139	1.63395	62.1637	1.04187	85.1893	0.429013	85.818	0.687697
611	622	10	9.38	2	LARREVWDQSAL	63.5363	0.573377	67.9817	0.595898	68.1217	0.550402	66.2393	0.578606		61.782	1.08142	67.457	0.147078	68.1363	1.16908	66.6523	0.682418		63.9097	1.19513	67.5587	0.475121	67.837	1.22347	66.979	0.566707		63.1687	1.29276	67.1137	0.585488	67.7733	1.01227	67.2943	0.846398		60.6483	1.11393	66.7237	0.931146	67.6633	0.650124	66.3993	0.295554
612	622	9	9.175	3	ARREVWDQSAL	65.689	0.547693	67.8027	0.136691	67.772	0.631088	66.8683	0.906877		64.7613	0.993995	67.5455	1.463	67.7973	0.934679	66.3003	0.289429		65.8617	0.835776	67.6847	0.583627	68.134	0.302	67.0657	0.763188		65.5287	0.950364	67.464	0.368243	67.617	0.64713	67.3597	0.42639		63.522	0.718501	67.3637	0.379806	67.486	1.20184	66.348	0.211915
623	630	6	12.15	2	DVGLTMQL	18.3593	1.04631	37.7663	2.54838	65.8373	4.0828	80.297	3.22169		16.2873	7.02972	31.3015	3.00167	57.99	3.76692	78.3363	3.43401		19.1123	1.71239	42.4723	4.50957	70.562	3.89754	83.6713	4.47872		15.9223	8.46518	27.5127	0.824815	55.9047	3.80943	78.2213	2.43419		14.867	2.08305	37.8883	1.57249	67.7993	2.54725	82.038	3.62556
631	635	3	10.73	1	LDCNF	19.8253	0.775203	36.8677	0.315151	65.083	0.143712	67.61	0.760594		16.9823	1.92799	33.424	0.44972	63.295	0.467543	67.1187	0.316522		24.5283	1.73384	47.4297	1.05412	67.8103	0.500844	68.1507	0.805334		17.603	1.61961	30.544	0.839583	62.631	0.700645	67.666	0.336572		18.846	0.936697	44.915	1.14097	66.9673	1.2704	66.9287	0.489367
636	642	5	4.43	1	SDENVRA	16.5503	0.450344	27.2233	1.02894	52.1903	0.682606	71.288	1.05378		18.299	0.925987	23.1905	0.678115	45.983	1.11783	68.924	1.02322		18.8933	1.61584	31.2817	0.709617	56.2417	0.215131	75.0803	0.703717		17.249	1.26499	23.2627	1.55098	45.359	0.763971	68.179	1.34885		18.203	1.3685	30.1623	1.08684	53.343	1.02762	73.3	0.768737
643	650	6	6.86	1	IAVQKLES	13.1447	0.470664	18.104	2.19131	30.7837	4.27478	72.4263	2.34348		12.8883	0.39524	17.2945	0.277893	29.7807	0.34102	66.6303	1.77374		14.1263	0.594294	18.0957	1.89989	41.4473	3.09331	82.9663	0.66325		13.7737	1.75252	17.1497	1.55929	29.329	1.12178	65.099	2.02551		12.925	0.624219	17.7	0.99838	32.3907	1.6553	78.062	0.556307
643	651	7	9.615	1	IAVQKLESL	12.1003	0.366729	14.783	0.287131	28.0967	1.24664	65.7973	1.31279		12.3177	0.881357	14.6735	0.321734	27.1637	0.790295	61.1907	0.553742		13.1207	0.708446	16.9213	0.657333	36.1637	0.965891	72.4703	1.31349		11.7097	0.499297	13.8047	0.361432	23.898	0.400476	59.536	0.453455		11.5517	0.247041	14.588	1.22288	27.866	0.114595	68.6307	0.93268
643	654	10	9.31	2	IAVQKLESLEDD	17.6267	0.843518	24.8617	0.290469	35.1823	0.91088	57.8287	0.600402		17.187	0.638843	23.845	0.0735391	32.946	0.636067	54.5393	1.25061		17.916	0.490343	25.5567	0.441396	38.6933	0.635204	63.6677	0.661759		17.329	0.719143	23.497	1.14646	32.216	0.607212	54.0617	1.33932		16.6053	0.650097	23.8193	0.237769	33.6683	0.789192	58.863	0.679744
643	657	13	11.355	2	IAVQKLESLEDDDVL	13.8667	0.647865	18.8427	0.119459	27.78	0.443003	47.5307	0.922606		13.475	0.764135	18.6395	0.39103	26.2073	0.525475	46.154	0.524046		13.806	0.551791	19.7777	0.218019	33.8083	0.596676	51.6283	0.762007		14	1.35319	18.3367	0.629462	25.9957	0.400515	45.7647	0.984324		13.141	0.93129	19.1383	0.19956	29.393	0.488077	49.889	0.270117
652	657	4	9.13	1	EDDDVL	4.727	0.671398	6.44833	0.178453	15.252	0.60954	27.435	0.252887		4.03433	1.16034	5.5085	0.1492	17.1037	1.33601	27.4693	1.28775		5.87933	0.468249	7.87033	0.475725	25.314	0.610727	28.7357	1.6439		4.224	0.624601	7.52033	0.82089	15.5007	0.718606	27.976	1.24063		4.44567	1.11333	8.295	0.974748	20.2507	1.15741	27.356	1.05911
654	662	7	12.965	2	DDVLHYLLQ	1.79767	0.145018	3.89833	0.935266	18.9733	0.369811	32.0167	0.49618		1.68033	0.848887	3.913	1.24592	18.8087	0.71406	30.8373	0.40083		2.362	0.122967	7.883	0.860866	24.1643	0.0786151	34.9783	0.637522		1.99767	0.375516	3.37067	0.857101	17.8497	1.25922	31.8257	0.826288		1.79567	0.246565	5.21367	0.81716	22.2823	0.556695	31.146	0.933838
655	662	6	12.77	2	DVLHYLLQ	1.603	0.237514	4.48867	0.601948	22.011	0.566977	39.8037	1.00483		1.60667	0.378022	4.5205	0.44477	22.2497	0.16464	40.8897	0.525393		2.391	0.327774	9.52533	0.687	30.317	0.284652	41.7413	0.803276		1.91267	0.331111	4.2	0.315525	20.2003	0.387557	40.344	0.426974		1.63267	0.159105	5.815	0.437939	27.1147	0.692464	40.9217	0.53024
655	663	7	14.35	2	DVLHYLLQL	1.68933	0.570366	4.59133	0.588028	19.5987	0.20729	36.3143	0.553982		1.418	0.588561	4.269	0.206475	20.4657	0.266162	35.9163	0.956921		2.59533	0.573561	9.057	0.167248	26.7047	0.421604	37.715	0.144627		1.48	0.319705	4.33867	0.513654	18.563	0.345252	36.2	0.1951		1.72933	0.294293	6.113	0.316242	24.5553	0.345221	36.7827	0.336387
658	665	6	11.67	2	HYLLQLVQ	1.38733	0.637477	2.91333	0.477411	11.2873	1.07725	17.204	1.51208		2.378	0.656629	4.8395	2.87439	11.9403	0.637778	18.492	0.924898		2.471	0.977542	3.51367	2.15485	10.104	0.522089	19.2987	1.0007		3.20033	1.37585	3.201	0.207632	10.0223	0.178192	18.3957	0.667064		1.03633	0.433655	2.72933	1.64988	10.104	1.17402	17.563	1.24721
663	677	12	9.705	3	LVQAVKFEPYHDSAL	3.917	0.0715821	6.71767	0.0675747	8.57967	0.157017	13.601	0.336553		3.595	0.440122	6.7355	0.111016	8.338	0.0597578	12.9913	0.0573527		4.10267	0.348721	7.11033	0.185152	8.59267	0.40159	13.9957	0.37663		3.542	0.567225	6.62	0.0554617	8.14633	0.206137	12.9067	0.116543		3.52867	0.0895005	6.88433	0.0785642	8.92367	0.306072	13.3833	0.0887487
664	677	11	9.325	2	VQAVKFEPYHDSAL	4.20267	0.229073	7.534	0.194286	9.28	0.190386	15.074	0.518819		3.83233	0.31283	7.2105	0.161927	9.15967	0.210384	14.0787	0.130236		4.51033	0.316799	7.767	0.185373	9.46533	0.148964	15.2013	0.329439		3.88233	0.684759	7.30333	0.188736	9.01433	0.199991	13.8947	0.0733848		3.69867	0.244079	7.55333	0.0881608	9.24967	0.33264	14.6913	0.117721
666	677	9	8.91	2	AVKFEPYHDSAL	5.083	0.224942	9.089	0.564019	11.62	0.357948	18.6683	0.20982		4.897	0.597676	9.416	0.275772	11.122	0.287799	17.2933	0.121583		5.51167	0.29105	9.58133	0.382273	11.6377	0.12752	18.5793	0.10427		4.704	0.883855	9.013	0.637306	11.0027	0.0636344	17.2187	0.0625806		4.59133	0.646464	9.717	0.276022	11.4797	0.455759	17.829	0.305962
681	697	15	10.535	5	LLKRGLRNKRIGHFLFW	0.365667	0.218573	0.498333	0.136873	1.17267	0.457909	3.28867	1.14293		0.430333	0.114286	0.414	0.169706	1.16233	0.546974	3.15567	0.995341		0.392333	0.136537	0.647333	0.249548	1.556	0.717197	3.248	1.32132		0.324667	0.136075	0.457667	0.128749	1.072	0.424713	3.26133	1.16623		0.306667	0.0993042	0.511667	0.142655	1.245	0.451618	3.12867	1.17589
698	713	14	7.725	4	FLRSEIAQSRHYQQRF	4.518	0.236987	7.10067	0.327715	17.492	1.18929	30.3167	1.77891		4.49833	0.545844	7.0505	0.301935	16.994	1.18101	29.805	1.25109		5.093	0.63995	9.26467	0.319894	19.8803	1.29696	30.7	1.30967		4.60533	0.937291	7.28467	0.334703	17.519	0.76786	31.1597	1.01168		4.78367	0.354336	9.00267	0.537292	19.4307	0.439925	30.4707	1.09005
700	713	12	6.03	4	RSEIAQSRHYQQRF	4.07467	0.727717	6.97733	0.906738	18.0507	0.504779	31.969	0.992484		3.88167	0.791716	6.708	0.779232	17.0843	1.17456	31.349	1.06907		4.63533	0.661409	9.079	0.951403	20.7977	0.626665	32.3163	1.09409		3.97733	0.535801	6.996	0.770092	17.6257	0.793102	32.4377	0.80124		4.20433	0.969813	8.96033	0.767695	20.0457	0.663978	32.5707	1.09445
714	719	4	9.26	1	AVILEA	0.721333	0.154623	0.874667	0.336848	0.879333	0.0349619	0.939333	0.153598		0.975	0.361526	0.7205	0.126572	0.810667	0.113588	1.15333	0.0957305		0.801333	0.198719	0.773	0.21957	0.829667	0.276171	1.157	0.105276		0.750333	0.111038	0.790333	0.712641	0.762	0.103116	1.343	0.600967		0.817667	0.379039	0.830333	0.0863732	0.937667	0.209304	0.879	0.267337
720	729	8	10.07	2	YLRGCGTAML	3.18467	0.249504	8.51233	0.181092	16.9817	0.722553	44.675	0.651187		2.36833	0.434808	8.395	0.265872	17.8453	0.447573	45.3627	0.709215		2.517	0.29377	7.57833	0.233671	18.177	0.544124	45.096	0.449407		2.866	0.255912	8.23067	0.677574	17.205	0.316479	45.2367	0.767414		2.31633	0.0557165	7.83567	0.755088	16.8717	0.170705	43.885	0.227515
729	737	7	7.555	2	LHDFTQQVQ	1.69733	0.408147	1.68067	0.27824	1.70567	0.298155	2.043	0.133011		1.58767	0.265316	1.0985	0.222739	1.74467	0.151143	3.066	0.573684		2.03633	1.02372	1.58067	0.0525008	2.14733	0.574792	3.536	0.478706		1.68833	0.258283	1.20433	0.361533	1.97267	0.516823	2.678	0.49022		1.37267	0.150706	1.571	0.109275	2.274	0.587153	2.52433	0.174947
732	737	4	5.63	1	FTQQVQ	1.84067	0.606634	2.129	0.817335	1.585	0.346416	3.60167	0.478502		1.65033	0.873808	1.7595	0.286378	2.36333	0.829666	4.06467	0.772452		3.59333	0.398836	1.815	1.00088	2.47333	0.463937	4.513	0.36555		3.00667	1.10509	1.61367	0.354782	2.47067	0.950274	3.742	0.954175		2.49467	0.573014	1.31567	0.555257	1.80067	0.320051	3.58967	0.393926
732	738	5	8.29	1	FTQQVQV	1.96033	1.04538	1.881	0.843155	3.51033	0.455548	3.703	1.06896		1.262	0.304235	1.0285	0.00919239	3.47133	1.11586	4.98733	1.0675		2.446	1.33548	2.711	0.399178	4.211	0.512507	4.87233	0.523352		2.512	1.49761	4.62933	0.274302	4.495	0.819056	4.067	1.34882		1.07567	0.324149	2.484	1.4432	3.18967	0.723536	3.00267	0.20708
742	747	4	8.265	1	LQKVTL	7.516	0.778807	27.2533	0.485677	56.5857	0.473145	77.2693	0.35149		7.22733	1.65386	30.618	0.339411	53.8023	0.44032	74.0477	0.393995		20.176	1.81259	43.6913	0.696644	70.8247	0.190686	88.9923	0.146193		5.413	1.01664	24.532	0.439368	54.623	0.0986864	79.5593	0.402165		7.965	0.636072	29.7697	0.504347	55.4657	0.203844	76.753	0.651837
748	761	12	8.035	2	DIKSLSAEKYDVSS	79.4283	0.676302	81.1653	1.49678	80.575	1.21301	79.615	0.300814		78.1373	4.85664	80.9185	1.9	80.1743	0.651861	79.3523	1.59472		79.699	1.3147	81.379	1.74856	81.849	1.23239	79.9117	0.586291		77.7813	1.49666	81.3383	2.10931	80.577	1.321	79.7783	0.183255		78.896	0.87754	80.9	2.1279	80.3663	0.38811	78.8103	0.891817
748	767	18	11.15	3	DIKSLSAEKYDVSSQVISQL	78.0677	1.17191	79.501	0.186	79.258	0.731421	79.0277	0.820409		77.3027	1.63845	79.276	0.828729	79.8167	0.57366	79.001	0.39538		77.52	0.891118	79.5993	0.370472	79.9923	0.309429	79.205	0.476715		77.4707	1.16181	78.9293	1.05658	79.7717	0.405632	78.9413	0.147276		76.7237	1.71367	79.1047	1.22428	79.394	1.08917	78.7347	0.0297714
748	782	32	12.5	5	DIKSLSAEKYDVSSQVISQLKQKLENLQNSQLPES	58.537	0.427171	73.5067	1.38018	80.7773	0.505292	80.094	0.968616		58.2777	1.65383	74.473	1.18511	79.4543	0.472511	80.05	0.814212		64.2297	1.34317	77.7197	0.521839	81.3377	0.791304	80.5367	0.912628		55.9147	0.318579	69.167	1.05689	79.7827	0.520089	80.274	1.18476		58.674	1.17309	74.2343	0.46692	80.475	1.35553	80.0337	0.860442
755	782	25	12.165	3	EKYDVSSQVISQLKQKLENLQNSQLPES	54.0957	0.54036	73.4917	0.342874	81.518	0.432212	81.1257	0.373605		53.4517	0.933144	73.77	0.636396	81.2553	0.531414	80.3817	0.381083		59.749	1.04011	78.339	0.162613	82.2947	0.694228	81.2847	0.650432		49.811	0.825695	67.3383	0.455198	80.8767	0.468925	80.7943	0.616025		53.144	0.806746	73.1393	1.61814	81.616	0.883042	80.762	0.330618
762	782	18	10.58	2	QVISQLKQKLENLQNSQLPES	50.2897	0.389952	76.5607	0.436276	88.6893	0.797051	87.618	0.102211		49.7513	2.176	78.0545	1.61574	88.4983	0.418918	87.617	0.210658		58.8257	1.87383	84.2467	0.408325	89.2997	0.30162	87.9603	0.584146		45.103	0.505012	68.7347	0.34059	87.6243	0.530302	88.1173	0.451006		50.21	0.443596	78.1687	0.797462	88.9517	0.352384	87.38	0.55088
767	782	13	7.485	2	LKQKLENLQNSQLPES	38.084	0.659798	63.3777	0.603891	78.3433	1.32678	77.8647	0.537664		38.613	1.46726	63.8845	1.10945	78.1873	0.847995	77.191	0.479666		48.7533	2.66264	72.323	0.120516	78.8427	0.624566	78.3977	0.200762		33.4703	1.39943	54.894	0.514726	77.0053	0.680856	78.0867	0.594584		37.1673	1.03768	65.0307	0.536136	78.2023	0.355086	77.4087	0.369873
768	782	12	7.21	2	KQKLENLQNSQLPES	39.139	0.767516	62.9763	0.6621	78.537	0.811362	77.744	0.740472		39.9767	1.36926	64.36	1.28693	78.2863	0.786815	77.6857	0.0605007		49.0697	0.650125	71.925	0.554151	78.9493	0.423091	78.5207	0.187415		34.6283	1.07886	55.1633	0.548513	76.7087	0.347296	77.993	0.237148		38.3803	0.631207	64.463	0.461858	78.307	0.610102	77.8573	0.553043
783	796	10	10.265	3	FRVPYDPGLKAGAL	3.25367	0.468024	4.58833	0.0803513	16.8263	0.227555	28.5917	0.0910018		2.671	0.322563	4.5355	0.108187	17.8157	0.292117	28.5663	0.372406		3.07233	0.0977258	4.98867	0.0938953	17.7793	0.139951	28.8233	0.175001		2.84367	0.157208	4.21967	0.0716682	14.863	0.533082	29.1137	0.173581		2.47367	0.226295	4.13167	0.111787	15.815	0.59933	28.8083	0.1885
797	812	13	7.06	4	AIEKCKVMASKKKPLW	18.346	1.69708	23.568	2.23763	35.424	2.62974	42.7903	4.07629		17.773	2.5695	23.4385	2.13193	29.5883	3.11206	36.463	3.29583		17.705	1.75445	23.9723	2.26998	33.993	3.26743	40.4953	3.30247		17.014	2.02997	20.1693	1.92446	29.3657	2.32517	38.7023	2.84839		17.8127	2.41275	23.2873	2.30571	33.0563	2.36067	41.5337	3.64378
797	815	16	10.505	2	AIEKCKVMASKKKPLWLEF	11.16	2.82676	15.3713	3.00399	24.407	4.61288	29.9027	6.283		11.4447	3.19966	15.1315	3.74272	20.7373	4.2268	26.1933	5.18383		11.069	2.82508	16.555	3.20858	24.4503	4.84945	28.494	5.82466		10.6307	3.06071	13.6763	3.06099	20.6107	4.21382	27.722	5.52902		10.6117	2.66691	15.9777	3.02396	23.585	4.27415	29.1433	5.54183
802	815	11	10.785	4	KVMASKKKPLWLEF	9.81133	0.808883	14.268	1.42504	17.2557	1.31561	20.2727	1.05693		11.201	0.805713	14.474	1.11864	15.557	1.29202	17.517	0.727402		9.42067	1.38451	13.5437	1.38506	16.919	0.95301	19.462	1.32555		9.79967	1.18846	11.6473	1.03493	15.9867	1.48182	19.325	0.784959		8.46233	0.746143	14.2393	0.959542	18.7153	0.389939	19.0907	1.45954
816	823	5	7.03	1	KCADPTAL	25.6483	1.35407	54.8933	0.496152	73.812	3.00979	72.341	2.84036		27.785	6.44375	55.086	0.773575	74.566	0.861253	72.0913	1.60227		29.1947	1.68426	59.5393	1.17018	75.3513	0.925069	73.182	1.73101		28.9023	10.4854	52.406	0.251738	74.529	0.224368	72.3307	1.16427		23.3523	1.8528	54.5363	0.73051	73.517	1.48087	71.744	1.20776
816	825	7	5.735	2	KCADPTALSN	40.0897	0.68127	62.3697	0.303711	75.813	0.535235	75.784	0.268464		40.5137	0.73835	61.6925	0.613062	75.9127	0.548541	76.0103	0.874867		42.199	1.22888	65.9483	0.479971	77.1353	0.705263	75.958	0.618699		41.726	1.34466	60.32	1.01358	76.1363	0.176421	74.755	0.687101		39.521	0.988578	62.6773	0.791855	74.63	1.00833	76.033	0.527455
816	829	11	8.225	2	KCADPTALSNETIG	38.1977	0.872017	55.2293	1.05883	66.265	4.83252	67.2527	4.41706		38.73	2.7732	55.404	0.190919	65.2403	3.37105	65.1303	3.93551		38.8383	0.825389	57.189	0.459013	66.1787	4.3424	68.2393	3.06057		38.784	4.01029	53.5303	1.95134	64.8073	1.12866	66.904	4.50323		36.582	1.65618	55.3733	1.53974	64.667	2.46742	65.481	3.76122
816	842	24	12.045	5	KCADPTALSNETIGIIFKHGDDLRQDM	17.2087	0.283507	27.7363	0.272342	36.8587	0.425317	40.3597	0.889462		16.8613	0.942442	27.3285	1.05288	36.6977	0.658075	39.6567	0.586722		18.99	0.845575	32.6297	0.0539846	39.7923	0.304641	41.0653	0.892001		17.1147	1.43702	24.139	0.57429	34.6317	0.804988	40.1213	0.761227		15.8283	0.49841	25.2117	0.6009	34.604	0.590393	39.2813	0.374321
824	829	4	5.58	1	SNETIG	38.5557	0.372017	51.836	0.776829	58.2223	0.712271	65.272	0.784622		39.838	0.705088	50.713	0.75519	58.0497	0.952551	60.0317	1.03303		35.75	0.360029	50.8207	0.752511	59.498	0.123923	61.209	1.22106		38.4203	1.66879	50.0493	1.0159	57.5413	0.998028	62.8653	0.330116		36.5563	1.44202	52.8943	0.782676	58.6003	0.859386	63.9927	0.410624
824	842	17	10.905	4	SNETIGIIFKHGDDLRQDM	5.77367	0.895776	14.607	1.00751	22.1947	0.725821	27.9673	0.0808352		6.43	0.505742	13.5785	0.668216	22.1063	0.51286	26.0613	1.3908		7.77067	0.692865	19.7903	0.742001	24.554	0.670074	27.8467	1.08925		4.84333	0.579859	10.2527	0.957849	19.4623	0.854454	25.7583	0.184001		4.85067	0.79393	10.877	0.771859	19.5883	0.842797	24.8927	0.324811
844	848	3	12.245	1	ILQIL	0.329333	0.275219	0.305667	0.218482	0.217333	0.558394	0.217667	0.770701		0.749333	0.701969	0.654	0.787717	0.484333	0.487629	0.679	0.380426		0.491667	0.560908	0.4	0.483608	0.372667	0.455649	0.579333	0.275231		0.855333	0.634637	0.563667	0.111733	0.510333	0.316491	0.924667	0.596109		0.559	0.528889	0.445	0.256158	0.477	0.0505866	0.483	0.498698
849	855	5	11.64	2	RIMESIW	1.20267	0.740065	2.40967	1.26839	3.02733	1.11122	5.13433	0.9568		2.13433	1.15222	1.81	0.61094	2.03733	0.889603	4.59533	0.297248		0.958	0.244092	2.10233	0.70704	2.07233	0.757843	3.04767	0.195881		1.97667	1.03804	1.00467	0.29634	1.91533	0.0061101	5.24233	0.853704		0.848	0.332555	2.82767	0.103549	2.54867	0.749468	5.91567	0.799351
849	862	12	13.285	2	RIMESIWETESLDL	5.13167	0.0690242	8.93533	0.525182	19.046	0.56751	31.5477	1.95598		4.684	0.600685	8.5195	0.208597	18.34	1.0414	30.681	2.0246		5.67167	0.411575	8.87733	0.222671	20.2417	0.485183	31.5037	1.07265		4.47067	0.745872	7.924	0.486632	17.2993	0.493929	31.56	0.809419		4.38633	0.521584	8.37767	0.629124	18.342	0.521236	32.9173	0.434852
853	862	8	13.39	2	SIWETESLDL	6.14567	0.56767	10.4897	0.900694	24.8353	0.605446	42.86	0.997545		5.443	0.672681	10.658	0.507703	23.7713	0.392613	40.617	0.914864		7.09367	0.583391	11.973	0.817705	28.0163	0.330778	44.182	0.356745		5.72933	0.414174	10.191	1.0614	22.928	0.425665	41.1227	0.888825		5.269	0.458946	10.206	0.566643	25.323	0.40818	43.783	0.846803
862	878	14	13.015	3	LCLLPYGCISTGDKIGM	1.557	0.74071	4.11767	0.282341	11.8367	0.2657	22.702	1.01051		2.46733	0.203495	5.3805	1.60301	10.3723	0.755754	18.86	0.383665		2.00267	0.404023	5.97767	0.592939	16.3997	0.731102	27.7577	0.465098		0.741333	0.667301	2.93633	0.261198	9.736	0.396516	15.7773	1.25162		0.759667	0.492317	4.45567	0.851567	13.3953	0.679106	24.8643	0.207926
863	869	4	11.825	1	CLLPYGC	3.82533	0.180423	10.011	1.03641	24.553	0.327639	52.1717	0.624687		4.22233	0.818375	10.9165	0.072832	22.37	1.37644	36.876	1.0945		4.09533	0.24028	12.1737	0.583992	23.87	0.236349	42.8727	0.556361		3.16	0.928748	7.40033	0.420517	19.753	0.936202	28.0023	1.12468		3.33467	0.354644	13.7363	0.456647	28.86	1.10358	56.3393	1.25945
863	878	13	12.19	2	CLLPYGCISTGDKIGM	3.704	0.658665	6.30867	0.356462	15.535	1.01994	28.5347	0.955817		3.28967	0.453041	6.5745	0.58902	13.663	0.618423	23.8163	0.933502		4.08667	0.167375	9.04867	0.583373	21.1383	1.09121	31.9767	1.11261		3.26733	0.160114	5.28133	0.747435	12.596	0.475912	21.3463	0.558436		3.39033	0.633713	7.00167	0.499952	17.569	0.780358	30.5213	0.769369
863	880	15	12.445	2	CLLPYGCISTGDKIGMIE	2.54533	0.254995	4.703	0.524872	12.548	0.508536	23.0587	0.78788		2.65433	0.474605	4.711	0.432749	11.011	0.224315	19.007	0.680015		2.91467	0.134601	7.00567	0.250684	16.7807	0.363255	25.9143	0.416068		2.56467	0.20156	3.782	0.295046	9.99567	0.344863	16.758	0.8205		2.225	0.371582	5.03033	1.09911	14.0247	0.494369	24.7523	0.615391
865	878	12	10.54	2	LPYGCISTGDKIGM	4.16867	0.684331	6.36533	0.427799	15.5253	0.903113	24.3643	0.973221		3.73333	0.511502	6.4	0.123037	15.2337	0.618851	21.4367	0.791468		4.301	0.254118	9.31633	0.325271	21.7817	1.20079	28.4163	0.64436		4.05167	0.700012	5.68333	0.591476	13.8683	0.524531	25.6987	7.78776		3.545	0.162945	7.34533	0.487931	16.838	1.16427	25.969	0.928532
879	887	7	7.205	1	IEIVKDATT	26.5333	1.06019	39.5523	0.228889	54.2627	0.846618	57.767	0.518443		5.85233	1.09734	15.1265	0.157685	26.288	0.743032	42.2297	0.68655		30.077	0.433023	34.066	0.128	39.0667	0.961178	51.8467	0.995124		16.8423	0.448813	28.182	0.138043	42.3443	0.156174	58.1573	0.413692		17.9167	1.15764	34.0673	0.827005	48.9377	0.29652	56.918	0.514779
879	889	9	9.165	1	IEIVKDATTIA	22.2633	0.671479	33.411	0.508074	45.452	0.225209	49.0297	0.145926		4.46733	1.05755	12.9495	0.484368	22.425	0.355068	36.1303	0.40043		26.1823	1.0585	34.9547	0.620311	46.3827	0.0749689	64.026	0.859199		14.0003	0.62586	24.146	0.34407	35.8223	0.194284	49.0593	0.497239		14.85	1.45155	29.2253	0.448346	41.761	1.04881	49.542	0.450421
881	901	19	8.405	3	IVKDATTIAKIQQSTVGNTGA	39.8757	0.472593	44.472	0.190942	50.1717	1.09553	58.1653	0.557839		35.093	0.922059	37.742	0.330926	44.1627	1.23121	52.4167	0.617078		47.148	1.31238	56.3127	0.466809	67.5423	0.0479826	72.97	0.572212		39.1267	0.693905	43.4427	0.574509	49.384	1.74837	58.081	0.0537029		38.2653	0.330819	43.5643	0.823294	50.7187	1.74548	58.299	0.590231
888	902	13	8.58	2	IAKIQQSTVGNTGAF	53.959	0.326437	60.3753	0.898912	63.6883	1.18723	74.049	1.06053		51.8207	1.02751	57.8015	1.11511	62.4477	1.12275	66.996	0.862096		64.7837	0.81237	72.5147	1.03027	81.361	0.675429	81.3827	0.253461		53.5073	1.1916	60.647	1.06327	64.4227	1.14512	74.447	1.0385		53.2283	1.42159	59.1167	0.532264	65.0537	0.559591	73.134	0.398526
888	907	18	9.585	3	IAKIQQSTVGNTGAFKDEVL	41.0583	0.597734	49.1543	0.357161	55.2253	0.980233	63.3187	1.02508		40.0553	1.56124	46.7435	0.905804	52.5253	1.09221	59.0847	1.09104		52.488	0.803015	63.3287	0.495034	71.0453	0.637249	71.655	0.838301		40.5143	1.1532	47.4017	0.51151	54.154	0.913929	62.737	0.685199		40.322	0.651021	47.549	1.21762	54.1227	0.721531	63.2863	0.12363
902	910	7	10.12	3	FKDEVLNHW	2.911	0.163009	4.562	0.460068	12.933	0.173554	23.1813	0.953629		2.50933	0.219436	4.292	0.257387	12.52	0.322	22.0547	0.477009		16.171	1.49229	28.9403	1.09769	39.9617	1.42797	39.3483	0.850906		2.851	0.482448	4.688	0.417532	12.5033	0.383324	22.9643	0.96836		2.79467	0.265349	4.535	0.587804	12.9593	0.475623	28.009	0.811806
902	924	20	9.595	4	FKDEVLNHWLKEKSPTEEKFQAA	8.09267	0.597421	12.8787	0.966381	19.93	0.975829	35.6437	2.53857		7.68067	0.920696	12.5395	1.03733	19.5383	1.33213	34.116	1.94171		13.2093	1.13024	27.2333	1.29083	50.267	4.02576	60.5377	2.16876		7.896	0.458632	12.7403	0.722899	19.4397	1.03896	35.493	1.82769		7.81767	0.485932	12.9193	0.977308	20.5187	0.73251	41.6197	1.65375
908	924	14	7.125	3	NHWLKEKSPTEEKFQAA	11.941	0.559775	18.8197	0.571902	24.9817	1.20369	42.2393	2.58936		11.2657	1.33415	18.3805	0.0247487	23.4433	1.30268	41.1997	0.775594		12.8017	1.00084	23.832	0.903455	49.6383	3.15237	62.1607	4.2516		11.3177	0.344506	17.8777	0.129639	23.8543	0.741659	42.3087	0.868651		11.509	0.434763	17.9303	0.779068	24.9747	0.950319	46.727	1.55313
925	934	8	9.14	1	VERFVYSCAG	1.69167	0.431325	1.95167	0.389171	2.75467	0.172016	2.92233	0.941855		1.71867	0.152762	1.0695	0.512652	1.85233	0.193733	2.02333	0.781771		1.55467	0.52015	2.09433	0.526909	2.372	0.124688	3.97567	0.833282		2.44667	1.38172	2.104	0.472834	2.421	0.0885381	2.925	0.816273		1.01533	0.416396	1.99533	0.498781	2.60733	0.800764	3.22867	1.03918
927	934	6	8.335	1	RFVYSCAG	1.731	0.720286	1.36133	0.552238	2.72233	0.602326	1.84167	0.183691		1.50467	0.688314	3.061	1.5825	1.85633	0.373631	2.27433	0.494854		2.027	0.909491	2.05833	0.872172	2.06967	1.10997	2.33833	0.686676		1.786	1.04532	1.97933	1.03365	1.95933	0.209039	2.53	1.04412		1.22133	0.727501	1.39267	0.705921	1.892	0.618501	2.457	0.776806
935	939	3	6.87	1	YCVAT	0.840667	0.0820508	0.769	0.297713	0.818667	0.354413	1.262	0.175784		0.853	0.440055	0.802	0.106066	1.07767	0.264593	1.02367	0.0551936		0.642667	0.440552	0.916667	0.329316	1.002	0.20664	0.954333	0.376565		0.535	0.41484	0.966667	0.440786	1.204	0.317973	1.35233	0.306882		0.523667	0.216077	0.254	0.232646	1.23533	0.280872	0.984333	0.0593492
940	953	12	10.655	3	FVLGIGDRHNDNIM	1.53533	0.0763697	2.511	0.200905	6.76133	0.537142	12.4397	0.876012		1.46167	0.28081	2.3865	0.0643467	6.736	0.417026	11.3707	0.573071		3.591	0.477275	9.51833	0.171524	17.7617	0.814294	21.5297	0.700593		1.46433	0.111733	2.467	0.352124	6.25533	0.433406	11.4063	0.81094		1.83133	0.181247	3.94533	0.505939	8.70467	0.658653	12.142	0.765502
954	960	5	7.75	1	ITETGNL	5.47767	0.612977	15.4383	0.506914	27.6857	0.677785	34.2023	0.659424		4.52033	0.715383	13.455	0.0608112	21.4163	0.334584	32.9093	1.09944		5.786	0.821931	15.6157	0.434928	27.098	1.16048	37.879	0.319282		4.585	1.11169	13.384	0.21523	21.8853	0.96582	33.962	0.169885		4.264	0.384462	15.3647	0.326327	28.706	1.02411	34.2423	0.566304
954	961	6	11.305	1	ITETGNLF	5.39667	1.12694	12.6557	1.22935	20.975	0.536266	25.5233	0.303793		4.34533	0.787335	10.931	0.494975	16.8293	0.926389	24.593	0.402705		6.77133	0.235918	14.1527	1.25335	21.5447	0.387991	28.2783	0.667869		5.58267	1.19584	12.7093	0.574256	16.894	0.722896	24.8993	0.144133		4.43867	0.363225	12.82	0.65685	24.318	1.18835	25.7503	0.314694
954	975	20	13.27	3	ITETGNLFHIDFGHILGNYKSF	28.5443	0.90168	31.7853	0.444698	34.5293	0.260462	37.5417	0.514499		27.9757	1.25621	32.3905	0.586192	34.322	0.662634	36.177	0.831739		29.219	0.622758	35.2567	0.527164	37.7853	0.785708	39.7167	1.11389		26.8197	0.359411	30.684	0.465314	33.8447	0.441217	33.9647	0.323825		26.171	0.358614	30.1273	0.592285	33.1163	0.478686	35.102	0.393549
954	976	21	13.89	4	ITETGNLFHIDFGHILGNYKSFL	32.555	0.379714	35.0567	0.752168	38.301	0.294883	40.4623	0.854264		31.838	1.62342	36.08	0.552958	37.3673	0.640246	39.7567	0.766529		33.0087	1.25189	38.01	1.21315	40.6917	0.561794	42.8957	0.962518		28.303	1.97293	34.8403	0.723519	37.5423	0.506273	38.03	0.911834		29.0853	0.816572	32.895	1.21184	36.511	0.441411	38.811	0.103
954	992	35	13.99	5	ITETGNLFHIDFGHILGNYKSFLGINKERVPFVLTPDFL	27.6483	0.692151	30.227	0.808926	32.995	0.154929	34.9227	1.3308		26.8473	1.25031	30.735	0.0438406	32.728	0.477058	33.981	0.902858		40.5963	1.20913	44.0893	0.791474	49.2923	0.439137	50.0503	1.02522		25.675	1.30054	29.471	1.13895	32.7037	0.364309	33.747	0.68542		25.772	0.308307	29.6247	0.188229	32.705	0.380505	43.4823	0.622063
961	972	10	12.76	3	FHIDFGHILGNY	34.875	0.817653	40.575	0.524904	44.8123	1.24331	48.492	1.24604		34.4663	4.16706	41.8775	0.649831	44.386	0.734033	47.4593	1.614		37.612	1.44323	47.7333	1.54634	49.8557	1.49451	51.262	1.06692		27.777	4.34858	39.2707	0.892267	43.6017	1.22886	44.6927	0.823301		30.9417	0.859524	37.0473	1.31943	41.9973	0.50199	45.5717	1.27809
961	975	13	12.42	4	FHIDFGHILGNYKSF	43.466	0.533362	48.2093	0.832674	51.0003	1.10604	53.8797	0.982489		43.7993	1.49538	48.4915	0.39103	50.6457	0.246504	53.377	0.954869		45.2153	0.664246	52.6423	1.01229	56.2057	1.18148	56.2407	0.517015		39.8713	0.122859	47.1923	0.960604	50.4833	0.447465	51.173	0.794504		40.174	0.522491	45.8657	0.831645	49.1517	0.619811	52.394	0.752883
961	976	14	13.41	4	FHIDFGHILGNYKSFL	48.0927	0.811516	51.5257	0.525761	49.6583	3.3723	50.0677	4.24475		47.3533	2.74381	52.409	0.128693	51.9127	2.28716	50.664	4.06897		48.7663	1.14984	54.8807	0.778229	53.9433	4.8985	53.4603	3.7663		41.355	5.37913	48.3383	3.78516	50.6763	3.52574	48.1923	4.97209		43.1647	2.61013	44.3993	3.71367	47.6367	3.56762	49.4807	4.58804
961	992	28	13.76	5	FHIDFGHILGNYKSFLGINKERVPFVLTPDFL	34.4437	1.40246	37.9523	0.824909	41.1207	0.578804	42.8837	1.15836		33.7663	1.53001	38.3875	0.501339	40.9613	0.892847	42.0397	1.05869		49.028	0.917425	54.9843	1.2148	60.4223	0.669967	60.4127	0.58226		32.2017	1.14438	37.5017	0.890468	40.8243	0.556906	41.724	0.353883		32.6293	0.964391	38.2587	0.777968	41.4767	0.27558	53.4013	0.756858
962	975	12	11.35	3	HIDFGHILGNYKSF	50.4083	0.263978	55.3227	0.792313	57.7483	0.391147	59.784	0.536294		50.735	1.10249	56.0355	0.649831	57.5293	0.205889	59.0303	0.672533		51.5153	1.29171	60.5743	0.678398	61.4657	0.918355	61.1897	1.06969		46.626	0.20782	53.7957	0.19468	56.9973	0.304668	57.276	0.227165		46.851	0.993644	53.442	1.01189	56.46	0.892934	57.9727	0.717729
973	992	16	12.83	4	KSFLGINKERVPFVLTPDFL	24.625	2.22376	28.1697	2.12655	31.7917	2.04472	34.2263	3.54775		24.88	2.44263	28.248	2.68418	31.9353	2.23139	32.54	2.34063		51.77	4.89365	57.2353	3.69224	63.7373	2.32012	63.1983	2.0592		24.9573	3.0472	27.8993	2.24321	31.5663	2.1842	32.9107	1.47838		25.0107	2.29383	30.2307	2.41957	33.8567	2.11767	54.3213	2.86662
976	992	13	13.205	3	LGINKERVPFVLTPDFL	18.878	1.65363	22.464	1.23016	26.866	0.964529	28.539	1.25205		19.5843	1.50058	22.747	1.19218	26.823	0.979467	28.711	1.41183		54.0017	1.51287	58.0573	1.43679	65.96	0.663021	66.2083	1.17073		19.6963	1.75982	22.314	1.23989	27.1023	0.84236	28.2403	0.677744		19.6067	1.42543	24.9223	1.60761	29.091	1.04059	54.7023	0.6115
977	992	12	12.975	3	GINKERVPFVLTPDFL	15.0183	1.09978	18.625	0.848954	23.0023	0.68363	25.3657	0.235874		15.517	1.42058	18.859	0.78206	22.8197	0.752985	25.4333	2.1363		54.8943	5.40455	58.9567	2.99817	65.8877	1.29727	65.8967	0.607301		15.6953	1.67155	18.2143	1.09668	23.0547	0.509947	25.0473	0.230335		15.6357	1.13813	21.1467	1.08	26.5273	1.69347	53.6393	1.77485
993	1014	19	9.575	2	FVMGTSGKKTSPHFQKFQDICV	6.96	2.10344	10.014	2.43345	13.3943	3.57765	19.168	4.38667		7.24967	2.39145	9.1795	3.33542	13.6817	3.66272	18.1067	3.74091		15.742	4.25563	22.7747	3.27811	29.644	4.68221	30.7937	4.36011		7.17533	1.90844	9.93533	2.81786	13.436	3.59852	18.9503	3.67229		6.97667	2.15082	10.3097	2.69481	14.9527	3.31707	23.6863	4.09938
1015	1026	10	6.425	2	KAYLALRHHTNL	2.64633	0.942192	3.59133	0.729859	6.76633	0.491071	10.6043	0.598832		2.39067	1.10859	3.486	0.585484	6.773	0.699784	10.246	0.183695		2.32667	0.287215	3.363	0.331227	7.09967	0.365165	10.9253	0.285497		2.60933	0.555131	3.18467	0.672289	6.403	0.504935	10.7853	0.595394		2.82433	0.54773	3.72867	0.420102	7.74433	0.614135	10.6793	0.175754
1015	1027	11	7.78	4	KAYLALRHHTNLL	1.433	0.738464	2.286	0.542054	5.77333	0.900917	9.13833	0.588989		1.50167	0.795503	1.947	0.644881	5.69533	1.03515	10.0533	0.127884		0.89	0.333078	1.991	0.608016	6.317	1.16831	9.66333	0.776432		1.76367	0.791864	2.75533	1.16566	5.506	0.969429	10.3803	0.597848		1.55633	0.307204	2.56667	0.306363	6.922	1.35205	9.39867	0.963233
1017	1026	8	6.825	3	YLALRHHTNL	2.84533	0.488304	4.30567	0.409688	8.38067	0.572791	13.566	0.366692		3.03	0.384004	3.884	0.110309	8.79567	0.954393	12.9787	0.683518		3.38833	0.975115	4.00833	0.290555	8.87533	0.402132	13.519	0.313842		3.26067	0.52697	4.16567	0.693764	8.08233	0.319678	13.6333	0.459184		3.72167	0.720861	4.93333	0.560502	10.015	0.123049	13.6553	0.607335
1017	1027	9	8.285	2	YLALRHHTNLL	1.80367	0.178422	2.532	0.61229	6.308	0.325461	11.4853	1.42296		2.07033	0.281152	2.6435	0.269408	6.492	0.412615	11.463	0.8277		1.75233	0.608615	2.169	0.587173	6.447	0.551397	11.4297	0.489404		2.31567	0.208639	2.482	0.895084	5.97733	0.50804	11.2893	0.440139		1.94767	0.249434	3.70333	0.583553	7.34667	0.569475	12.1793	0.231314
1019	1026	6	4.225	2	ALRHHTNL	6.00333	0.987555	6.796	0.243606	11.895	0.370962	19.498	0.262909		4.84533	0.930245	6.0985	0.331633	12.106	0.468541	19.5317	1.38996		5.127	0.322594	6.619	0.192281	12.2037	0.625911	19.0353	0.439291		6.17567	0.533105	6.914	1.38522	12.0843	0.610027	19.635	0.494054		5.68333	0.651927	7.30767	0.167989	13.983	0.731853	18.8087	0.647761
1019	1027	7	6.35	2	ALRHHTNLL	2.70167	0.414084	3.52833	0.219475	8.095	0.402657	14.5173	0.671918		2.726	0.454446	3.647	0.756604	8.747	0.439685	14.7827	0.440693		2.683	0.581759	3.593	0.741324	8.703	0.582315	15.5573	0.423184		3.22	0.568844	3.292	0.600166	8.26133	0.340566	14.7927	0.254308		3.02667	0.693138	4.81567	0.613657	9.914	0.55951	14.7403	0.209927
1031	1035	3	13.395	1	FSMML	0.742	0.16808	0.588333	0.372607	2.20967	0.534749	9.397	0.891015		0.867667	0.116629	0.625	0.480833	2.278	0.505255	8.25167	0.294254		0.518	0.278216	0.911	0.0830723	1.999	0.430031	12.2397	0.407446		0.634333	0.368299	0.754333	0.0509542	1.651	0.534658	5.845	0.679903		0.424333	0.0750755	0.879667	0.130997	3.16633	0.711284	14.5533	0.67022
1035	1042	5	11.67	2	LMTGMPQL	35.791	1.33877	52.1277	0.701644	66.2793	1.02154	69.3913	1.30587		33.913	0.275305	50.549	1.40149	65.0867	0.695877	69.0603	0.555208		46.4173	0.991912	61.7533	1.07749	68.9573	0.855837	69.683	0.670432		33.815	0.995363	44.3747	1.25886	64.1413	0.968718	68.8597	0.787788		34.1393	0.672794	52.885	0.87107	67.7397	1.05292	69.413	0.110014
1035	1050	13	10.945	2	LMTGMPQLTSKEDIEY	35.8153	2.15668	51.9973	2.59032	69.815	3.30584	72.4873	3.25721		34.014	4.32658	50.5265	2.69337	69.3723	3.27866	71.963	3.37565		41.458	2.34266	55.925	3.18528	71.643	2.95997	72.296	3.74209		31.495	0.258052	46.638	2.73596	66.5833	3.2394	73.0277	2.91581		34.1467	2.55806	52.9013	2.98041	70.7637	2.79805	72.0497	3.13674
1036	1042	4	10.995	1	MTGMPQL	48.5217	1.82743	69.697	1.33941	80.6373	2.29818	77.76	1.42075		44.8013	6.87289	70.242	0.306884	79.9143	1.44866	78.283	0.848585		65.193	2.74318	79.5757	1.79129	79.662	1.60213	78.2583	0.281123		38.932	4.65457	61.5297	0.453134	79.0717	1.82167	77.9953	1.23364		45.8457	4.54808	71.0023	0.862471	80.7843	2.472	77.919	1.36472
1050	1071	20	9.82	4	YIRDALTVGKNEEDAKKYFLDQ	12.5837	0.404734	14.2793	0.212989	17.4277	0.670308	27.9933	1.45181		12.6487	0.759231	13.9045	0.0233345	17.494	0.779194	26.711	0.732889		12.754	0.348837	16.2243	0.218976	22.725	0.914921	51.8157	0.976998		12.6903	0.355041	13.7903	0.192511	17.0723	0.764937	26.4113	0.674925		12.8773	0.191563	15.267	0.618372	19.4617	0.196042	36.8877	0.547482
1051	1069	17	9.605	5	IRDALTVGKNEEDAKKYFL	12.5183	0.959851	14.5593	0.713079	16.8573	1.74795	26.4427	1.94922		12.219	1.36404	14.1755	0.765797	17.951	2.11158	25.2113	1.45606		12.6377	0.698045	16.277	1.2872	22.4957	2.25988	48.9983	1.76705		12.155	0.818645	13.5903	0.532367	16.9983	1.67155	25.605	1.46133		12.5327	0.405382	15.186	0.93498	18.821	1.10502	34.4523	1.28978
1051	1071	19	9.495	3	IRDALTVGKNEEDAKKYFLDQ	13.079	0.489804	14.4787	0.308508	17.3403	0.833634	25.7503	1.3212		13.072	0.806	14.206	0.41295	17.4663	1.21959	24.885	1.01351		13.1753	0.597194	17.3367	0.87287	24.089	3.70159	51.7187	1.35011		13.1143	0.202934	14.3573	0.296918	17.111	0.944006	25.0433	0.672879		13.1367	0.309555	15.4903	0.62927	19.4223	0.671742	34.8717	1.15635
1051	1073	21	10.42	4	IRDALTVGKNEEDAKKYFLDQIE	11.5223	0.371242	12.8017	0.402932	19.7683	6.69089	28.1677	3.22002		11.3867	0.488911	12.574	0.405879	19.9503	6.33581	28.69	3.06146		11.6987	0.415976	15.59	0.209014	27.715	3.86882	53.591	1.09592		11.65	0.359038	12.7757	0.240344	19.6443	7.02058	27.772	4.25861		11.6233	0.160232	13.8307	0.782085	23.0457	4.52368	38.0097	1.48564
1072	1084	11	11.125	3	IEVCRDKGWTVQF	12.7987	0.75752	30.925	1.16307	50.9153	1.1273	54.1293	0.716363		12.6957	1.12996	32.562	0.823072	50.1873	0.932552	53.5017	0.702163		23.2133	1.71363	49.047	0.554605	65.722	1.16481	67.8573	0.933024		13.114	0.183191	33.9167	0.875476	50.979	0.503003	54.025	0.808703		18.8487	0.53089	43.756	1.43513	53.7213	0.933148	61.878	0.302851
1088	1092	3	11.04	2	LHLVL	42.829	0.784179	85.6843	1.08639	87.7637	1.73462	88.2877	0.435677		38.2923	7.87583	85.327	1.22895	87.837	0.618976	86.7683	0.95626		11.7653	0.518989	20.3277	0.689342	28.8357	1.07138	83.9337	0.671236		35.6043	5.86354	86.4657	1.16919	87.2367	0.465373	85.624	0.497533		43.913	1.21378	84.7977	1.05392	86.9447	0.732864	87.6057	0.977996

## Sheet: Figure 4_HDExaminer raw data
							3s						3s						3s						30s						30s						30s						300s						300s
State	Start	End	Sequence	Search RT	Charge	Max D	Start RT	End RT	#D	%D	Score	Conf	Start RT	End RT	#D	%D	Score	Conf	Start RT	End RT	#D	%D	Score	Conf	Start RT	End RT	#D	%D	Score	Conf	Start RT	End RT	#D	%D	Score	Conf	Start RT	End RT	#D	%D	Score	Conf	Start RT	End RT	#D	%D	Score	Conf	Start RT
APO	6	12	YKQPVVL	8.77	1	4	8.68	8.89	3.727	93.171	0.9244	Medium	8.67	8.88	3.743	93.568	0.9029	Medium	8.68	8.89	3.752	93.8	0.9196	Medium	8.68	8.89	3.735	93.386	0.9248	Medium	8.68	8.89	3.737	93.415	0.9224	Medium	8.68	8.89	3.778	94.461	0.9199	Medium	8.68	8.89	3.724	93.095	0.9198	Medium	8.67
APO	36	41	ELIPIE	10.59	1	3	10.64	10.74	0.056	1.882	0.9055	Medium	10.64	10.73	0.046	1.524	0.8985	Medium	10.64	10.73	0.039	1.289	0.8965	Medium	10.64	10.73	0.075	2.498	0.9019	Medium	10.64	10.74	0.085	2.817	0.9081	Medium	10.64	10.74	0.068	2.268	0.9085	Medium	10.64	10.73	0.253	8.441	0.9	Medium	10.64
APO	36	42	ELIPIEF	13.88	1	4	13.86	13.96	0.129	3.231	0.8449	Medium	13.93	14	0.154	3.855	0.7632	Medium	13.87	13.96	0.182	4.553	0.738	Medium	13.86	13.95	0.17	4.25	0.8437	Medium	13.99	14.07	0.139	3.485	0.7889	Medium	13.93	14.01	0.165	4.132	0.7217	Medium	13.86	13.96	0.372	9.289	0.8289	Medium	13.86
APO	42	58	FVLPTSQRKCKSPETAL	8.48	3	13	8.09	8.77	4.747	36.515	0.9265	High	8.09	8.77	4.477	34.439	0.9008	High	8.09	8.77	4.455	34.268	0.9096	High	8.09	8.77	5.851	45.009	0.9353	High	8.09	8.77	5.585	42.96	0.9384	High	8.09	8.77	5.624	43.264	0.9076	High	8.09	8.77	6.804	52.338	0.9337	High	8.29
APO	42	59	FVLPTSQRKCKSPETALL	9.43	3	14	9.26	9.7	4.361	31.153	0.9178	Medium	9.25	9.7	3.918	27.987	0.9315	High	9.25	9.7	3.898	27.843	0.924	High	9.26	9.7	5.403	38.595	0.918	Medium	9.26	9.7	5.198	37.126	0.9171	Medium	9.26	9.7	5.016	35.832	0.9151	High	9.26	9.7	6.41	45.784	0.918	Medium	9.26
APO	59	70	LHVAGHGNVEQM	6.54	2	10	6.78	6.87	1.572	15.725	0.8667	Medium	6.78	6.86	1.445	14.448	0.8541	Medium	6.78	6.86	1.496	14.96	0.8604	Medium	6.78	6.86	1.93	19.302	0.8898	Medium	6.78	6.87	1.905	19.053	0.8721	Medium	6.87	6.94	2.059	20.592	0.8356	Medium	6.78	6.86	2.287	22.87	0.8874	Medium	6.78
APO	59	72	LHVAGHGNVEQMKA	5.97	2	12	5.9	6.06	0.826	6.887	0.8971	Medium	5.89	6.05	0.616	5.133	0.9095	Medium	5.89	6.05	0.764	6.37	0.8981	Medium	5.9	6.06	1.407	11.723	0.9003	Medium	5.9	6.06	1.408	11.735	0.8452	Medium	5.9	6.06	1.166	9.714	0.884	Medium	5.9	6.06	1.995	16.627	0.9056	Medium	5.9
APO	60	70	HVAGHGNVEQM	5.29	2	9	5.31	5.42	0.753	8.364	0.9131	High	5.31	5.42	0.619	6.88	0.939	High	5.31	5.42	0.686	7.626	0.9358	High	5.31	5.42	1.221	13.562	0.9425	High	5.31	5.42	1.264	14.049	0.9344	High	5.31	5.42	1.237	13.74	0.9403	High	5.31	5.42	1.853	20.588	0.9269	High	5.31
APO	60	74	HVAGHGNVEQMKAQV	5.94	3	13	5.9	6.24	0.787	6.051	0.7836	Medium	5.89	6.23	0.619	4.761	0.8023	Medium	5.89	6.23	0.67	5.15	0.8194	Medium	5.9	6.23	1.21	9.305	0.7899	Medium	5.9	6.24	1.458	11.214	0.7488	Medium	5.9	6.23	1.119	8.607	0.7833	Medium	5.9	6.23	1.752	13.474	0.8172	Medium	5.9
APO	60	75	HVAGHGNVEQMKAQVW	8.28	3	14	8.16	8.49	0.531	3.791	0.811	Medium	8.15	8.48	0.384	2.745	0.8682	Medium	8.15	8.48	0.368	2.626	0.8891	Medium	8.16	8.48	0.828	5.912	0.8397	Medium	8.16	8.49	0.846	6.041	0.8077	Medium	8.16	8.49	0.653	4.666	0.872	Medium	8.16	8.48	1.552	11.087	0.8417	Medium	8.15
APO	71	76	KAQVWL	10.59	2	4	10.64	10.71	0.077	1.914	0.9253	Medium	10.64	10.71	0.047	1.166	0.9499	Medium	10.64	10.71	0.068	1.708	0.9554	Medium	10.64	10.71	0.061	1.532	0.9246	Medium	10.64	10.71	0.06	1.498	0.9394	Medium	10.64	10.71	0.064	1.591	0.9438	Medium	10.64	10.71	0.081	2.032	0.9201	Medium	10.64
APO	77	84	RALETSVA	6.28	2	6	6.13	6.2	2.505	41.758	0.856	Medium	6.06	6.15	2.668	44.471	0.847	Medium	6.06	6.15	2.586	43.094	0.8765	Medium	6.07	6.15	3.328	55.462	0.812	Medium	6.16	6.24	3.276	54.594	0.8131	Medium	6.13	6.2	3.239	53.976	0.8585	Medium	6.07	6.15	3.879	64.656	0.8429	Medium	6.07
APO	79	84	LETSVA	6.27	1	4	6.19	6.28	2.498	62.458	0.9096	Medium	6.18	6.27	2.491	62.267	0.9145	Medium	6.18	6.27	2.585	64.632	0.9147	Medium	6.18	6.28	3.175	79.371	0.9228	Medium	6.19	6.28	3.195	79.874	0.8834	Medium	6.18	6.28	3.215	80.384	0.9021	Medium	6.18	6.28	3.432	85.803	0.9353	Medium	6.18
APO	79	86	LETSVAAD	6.15	1	6	5.98	6.38	4.07	67.833	0.8044	Medium	5.98	6.37	3.763	62.722	0.9	Medium	5.98	6.37	3.907	65.117	0.8836	Medium	5.98	6.38	4.812	80.205	0.8297	Medium	5.98	6.38	4.777	79.612	0.7869	Medium	5.98	6.38	4.511	75.186	0.8633	Medium	5.98	6.38	4.982	83.036	0.849	Medium	5.98
APO	87	99	FYHRLGPHHFLLL	10.38	2	10	10.4	10.48	0.451	4.511	0.9237	Medium	10.4	10.48	0.392	3.925	0.9281	Medium	10.4	10.48	0.421	4.208	0.9153	Medium	10.4	10.48	0.833	8.327	0.902	Medium	10.4	10.48	0.801	8.006	0.9041	Medium	10.4	10.48	0.657	6.572	0.9297	Medium	10.4	10.48	1.049	10.486	0.9035	Medium	10.4
APO	88	98	YHRLGPHHFLL	8.43	4	8	8.58	8.67	0.453	5.665	0.8758	Medium	8.57	8.67	0.414	5.17	0.9184	Medium	8.57	8.67	0.442	5.523	0.9261	Medium	8.58	8.67	0.969	12.114	0.8779	Medium	8.58	8.67	0.979	12.241	0.8594	Medium	8.58	8.67	0.878	10.974	0.8866	Medium	8.58	8.67	1.223	15.291	0.8689	Medium	8.57
APO	88	99	YHRLGPHHFLLL	9.88	4	9	9.85	10.38	0.468	5.195	0.9323	High	9.84	10.38	0.416	4.617	0.9321	High	9.84	10.38	0.46	5.11	0.9434	High	9.84	10.38	0.871	9.68	0.9408	High	9.85	10.38	0.81	9.002	0.9432	High	9.85	10.38	0.78	8.67	0.9274	High	9.84	10.38	1.108	12.313	0.934	High	9.85
APO	100	106	YQKKGQW	5.9	1	5	6	6.09	1.736	34.715	0.9245	Medium	6	6.09	1.706	34.122	0.9265	High	5.99	6.09	1.776	35.53	0.89	Medium	6	6.09	2.751	55.029	0.9209	Medium	6	6.09	2.66	53.197	0.894	Medium	6	6.09	2.687	53.749	0.9054	Medium	6	6.09	3.034	60.679	0.9098	High	6
APO	107	113	YEIYDKY	9.1	1	5	8.99	9.18	1.391	27.829	0.8014	Medium	8.99	9.18	1.358	27.17	0.9074	Medium	8.99	9.18	1.431	28.616	0.8759	Medium	8.99	9.18	2.175	43.508	0.8452	Medium	8.99	9.18	2.171	43.412	0.7781	Medium	8.99	9.18	2.19	43.797	0.8616	Medium	8.99	9.18	2.86	57.203	0.8101	Medium	8.98
APO	107	118	YEIYDKYQVVQT	9.45	2	10	9.41	9.48	1.448	14.478	0.8516	Medium	9.4	9.47	1.326	13.262	0.9306	High	9.41	9.47	1.355	13.553	0.9196	High	9.41	9.47	2.302	23.017	0.8928	High	9.41	9.48	2.222	22.219	0.8438	Medium	9.41	9.48	2.178	21.781	0.92	High	9.41	9.48	3.57	35.703	0.8973	High	9.41
APO	107	121	YEIYDKYQVVQTLDC	11.03	2	13	11.2	11.28	2.72	20.922	0.8874	Medium	11.13	11.22	2.458	18.908	0.9382	Medium	11.13	11.22	2.489	19.145	0.9315	Medium	11.13	11.22	3.536	27.199	0.9029	Medium	11.13	11.22	3.581	27.55	0.8728	Medium	11.13	11.22	3.368	25.909	0.9335	Medium	11.25	11.33	4.922	37.861	0.8578	Medium	11.13
APO	114	119	QVVQTL	8.16	1	4	8.18	8.27	0.061	1.513	0.8417	Medium	8.17	8.26	0.063	1.564	0.8926	Medium	8.17	8.26	0.075	1.876	0.8642	Medium	8.17	8.27	0.07	1.744	0.8836	Medium	8.18	8.27	0.094	2.354	0.7626	Medium	8.17	8.27	0.107	2.684	0.8023	Medium	8.17	8.27	0.187	4.671	0.8488	Medium	8.17
APO	122	137	LRYWKATHRSPGQIHL	7.45	4	13	7.44	7.95	0.81	6.231	0.9113	Medium	7.44	7.94	0.592	4.551	0.9028	Medium	7.44	7.94	0.584	4.495	0.9101	Medium	7.44	7.95	1.796	13.817	0.8925	Medium	7.44	7.95	1.594	12.258	0.8888	Medium	7.44	7.95	1.303	10.025	0.8994	Medium	7.44	7.95	3.2	24.618	0.9082	Medium	7.44
APO	125	137	WKATHRSPGQIHL	6.9	3	10	6.81	6.88	0.869	8.69	0.8642	Medium	6.81	6.88	0.773	7.729	0.8741	Medium	6.81	6.88	0.89	8.903	0.8757	Medium	6.81	6.88	1.599	15.989	0.9063	Medium	6.82	6.88	1.936	19.361	0.7057	Medium	6.81	6.88	1.561	15.612	0.8423	Medium	6.81	6.88	2.076	20.764	0.917	Medium	6.81
APO	138	149	VQRHPPSEESQA	4.07	2	8	4.14	4.22	3.486	43.571	0.9203	Medium	3.94	4.37	3.298	41.229	0.9416	High	3.94	4.37	3.393	42.418	0.9347	High	3.94	4.38	4.258	53.224	0.9325	Medium	3.94	4.38	4.171	52.143	0.9157	Medium	3.94	4.38	4.171	52.142	0.9268	High	3.94	4.38	5.148	64.346	0.9413	High	3.94
APO	138	150	VQRHPPSEESQAF	6.68	2	9	6.54	6.95	2.986	33.182	0.8466	Medium	6.53	6.94	2.937	32.637	0.8861	Medium	6.53	6.94	3.057	33.964	0.8755	Medium	6.54	6.95	4.182	46.468	0.8646	Medium	6.54	6.95	4.151	46.118	0.8576	Medium	6.54	6.95	4.201	46.683	0.8649	Medium	6.54	6.95	5.471	60.79	0.8692	Medium	6.53
APO	138	157	VQRHPPSEESQAFQRQLTAL	9.74	4	16	9.55	9.95	2.227	13.916	0.8348	Medium	9.55	9.94	1.967	12.291	0.8711	Medium	9.55	9.94	1.952	12.197	0.8678	Medium	9.55	9.94	3.582	22.39	0.823	Medium	9.55	9.95	3.369	21.054	0.7958	Medium	9.55	9.95	3.368	21.053	0.8295	Medium	9.55	9.94	5.865	36.656	0.811	Medium	9.55
APO	150	157	FQRQLTAL	9.07	2	6	9.05	9.14	0.186	3.104	0.9089	High	9.04	9.14	0.192	3.196	0.9047	Medium	9.04	9.14	0.178	2.965	0.9119	Medium	9.05	9.14	0.318	5.293	0.9118	High	9.05	9.14	0.318	5.298	0.9028	Medium	9.05	9.14	0.364	6.07	0.9232	Medium	9.05	9.14	1.109	18.486	0.9077	High	9.05
APO	151	157	QRQLTAL	7.99	2	5	8.02	8.12	0.162	3.234	0.9272	High	8.02	8.11	0.152	3.035	0.9292	High	8.02	8.11	0.147	2.948	0.928	High	8.02	8.11	0.31	6.191	0.9507	High	8.02	8.12	0.309	6.187	0.951	Medium	8.02	8.12	0.351	7.029	0.9513	High	8.02	8.12	1.02	20.401	0.9346	High	8.02
APO	158	164	IGYDVTD	8.21	1	5	8.08	8.32	0.835	16.7	0.8617	Medium	8.08	8.31	0.77	15.392	0.9248	High	8.08	8.31	0.787	15.747	0.898	High	8.08	8.32	1.125	22.492	0.8895	High	8.08	8.32	1.19	23.795	0.8281	Medium	8.08	8.32	1.225	24.504	0.8734	High	8.08	8.32	2.421	48.425	0.8961	High	8.08
APO	158	173	IGYDVTDVSNVHDDEL	10.34	2	14	10.26	10.33	3.611	25.796	0.9079	Medium	10.25	10.33	3.272	23.368	0.9203	High	10.25	10.33	3.45	24.642	0.9319	High	10.25	10.33	4.964	35.457	0.9073	High	10.26	10.33	4.997	35.691	0.8702	Medium	10.26	10.33	4.691	33.51	0.9014	Medium	10.26	10.33	6.427	45.908	0.8969	Medium	10.26
APO	158	174	IGYDVTDVSNVHDDELE	9.9	2	15	9.86	9.93	3.664	24.428	0.902	High	9.86	9.93	3.218	21.456	0.8626	Medium	9.86	9.93	3.502	23.345	0.9303	High	9.86	9.93	4.996	33.309	0.9127	High	9.86	9.93	4.875	32.502	0.8866	Medium	9.86	9.93	4.683	31.221	0.9088	High	9.86	9.93	6.705	44.697	0.9198	High	9.86
APO	161	174	DVTDVSNVHDDELE	8.32	2	12	8.22	8.62	3.492	29.1	0.8967	Medium	8.58	8.7	3.221	26.84	0.6432	Medium	8.21	8.62	3.367	28.061	0.9335	High	8.22	8.62	4.598	38.32	0.9286	High	8.22	8.62	4.465	37.205	0.9173	High	8.22	8.62	4.307	35.895	0.917	High	8.42	8.49	5.6	46.663	0.9198	High	8.51
APO	165	175	VSNVHDDELEF	10.56	2	9	10.44	10.66	1.289	14.325	0.8341	Medium	10.44	10.66	1.203	13.371	0.8282	Medium	10.44	10.66	1.345	14.947	0.8452	Medium	10.44	10.66	2.196	24.4	0.8482	Medium	10.44	10.66	2.13	23.672	0.7871	Medium	10.44	10.66	2.166	24.066	0.8036	Medium	10.44	10.66	2.765	30.725	0.8545	Medium	10.44
APO	174	182	EFTRRGLVT	7.02	2	7	6.99	7.08	0.237	3.382	0.9516	High	6.99	7.08	0.199	2.844	0.9412	High	6.99	7.08	0.229	3.278	0.9471	High	6.99	7.08	0.266	3.798	0.9584	High	6.99	7.08	0.27	3.854	0.9399	Medium	6.99	7.08	0.279	3.992	0.9483	High	6.99	7.08	0.667	9.526	0.9113	High	6.99
APO	174	185	EFTRRGLVTPRM	7.96	3	9	7.82	8.06	0.23	2.552	0.8929	Medium	7.82	8.05	0.16	1.779	0.9106	Medium	7.82	8.05	0.222	2.467	0.9143	Medium	7.82	8.06	0.31	3.449	0.8942	Medium	7.82	8.06	0.163	1.814	0.8842	Medium	7.82	8.06	0.267	2.962	0.9007	Medium	7.82	8.06	0.632	7.022	0.893	Medium	7.82
APO	174	187	EFTRRGLVTPRMAE	7.6	2	11	7.55	7.63	0.42	3.814	0.7006	Medium	7.54	7.62	0.313	2.846	0.7524	Medium	7.54	7.63	0.318	2.893	0.765	Medium	7.54	7.63	0.376	3.416	0.799	Medium	7.7	7.77	0.406	3.692	0.858	Medium	7.55	7.63	0.479	4.353	0.6263	Medium	7.54	7.63	0.938	8.532	0.8533	Medium	7.54
APO	174	195	EFTRRGLVTPRMAEVASRDPKL	8.28	5	18	8.13	8.45	1.286	7.145	0.8592	Medium	8.13	8.45	1.182	6.566	0.8863	Medium	8.13	8.45	1.295	7.193	0.8947	Medium	8.13	8.45	1.995	11.082	0.857	Medium	8.13	8.45	1.865	10.36	0.8472	Medium	8.13	8.45	1.814	10.079	0.8788	Medium	8.13	8.45	3.77	20.943	0.8124	Medium	8.13
APO	175	182	FTRRGLVT	6.2	2	6	6.13	6.34	0.229	3.816	0.8884	Medium	6.13	6.34	0.23	3.838	0.8856	Medium	6.13	6.34	0.215	3.577	0.9109	Medium	6.13	6.34	0.223	3.722	0.9353	Medium	6.13	6.34	0.268	4.46	0.9166	Medium	6.13	6.34	0.293	4.878	0.9128	Medium	6.13	6.34	0.626	10.441	0.9353	Medium	6.13
APO	176	182	TRRGLVT	4.73	2	5	4.86	4.95	0.217	4.342	0.925	Medium	4.85	4.95	0.155	3.107	0.9025	Medium	4.85	4.94	0.177	3.547	0.9321	Medium	4.86	4.95	0.2	3.992	0.9466	Medium	4.86	4.95	0.227	4.546	0.9362	Medium	4.86	4.95	0.205	4.1	0.9527	Medium	4.86	4.95	0.63	12.592	0.9253	Medium	4.86
APO	176	185	TRRGLVTPRM	6.49	2	7	6.5	6.6	0.291	4.157	0.8049	Medium	6.5	6.59	0.218	3.109	0.8513	Medium	6.5	6.59	0.252	3.601	0.8625	Medium	6.5	6.6	0.294	4.207	0.8883	High	6.5	6.6	0.344	4.916	0.8062	Medium	6.5	6.6	0.369	5.277	0.8247	Medium	6.5	6.6	0.663	9.473	0.9383	High	6.5
APO	183	195	PRMAEVASRDPKL	6.78	3	10	6.66	6.99	1.352	13.516	0.9032	Medium	6.66	6.99	1.277	12.771	0.9114	Medium	6.66	6.99	1.407	14.069	0.907	Medium	6.66	6.99	1.922	19.218	0.9025	Medium	6.66	6.99	1.931	19.311	0.8956	Medium	6.66	6.99	1.936	19.359	0.9016	Medium	6.66	6.99	3.356	33.56	0.902	Medium	6.66
APO	186	195	AEVASRDPKL	5.95	2	7	5.87	6.28	1.362	19.456	0.9253	High	5.87	6.27	1.254	17.919	0.9441	High	5.87	6.27	1.331	19.018	0.9484	High	5.87	6.28	1.893	27.046	0.9432	High	5.87	6.28	1.876	26.796	0.9397	High	5.87	6.28	1.871	26.726	0.9289	High	5.87	6.28	3.031	43.303	0.9473	High	5.87
APO	188	195	VASRDPKL	5.26	2	5	5.21	5.59	1.322	26.439	0.8455	Medium	5.21	5.58	1.22	24.392	0.8385	Medium	5.21	5.58	1.281	25.613	0.8616	Medium	5.21	5.59	1.778	35.557	0.9203	High	5.21	5.59	1.813	36.262	0.8971	Medium	5.21	5.59	1.838	36.756	0.909	High	5.21	5.59	2.52	50.406	0.9249	High	5.21
APO	196	211	YAMHPWVTSKPLPEYL	11.65	3	11	11.54	12.1	3.289	29.9	0.9122	High	11.54	12.1	3.177	28.884	0.9018	High	11.54	12.1	3.185	28.952	0.899	High	11.54	12.1	4.33	39.359	0.9028	High	11.54	12.1	4.198	38.161	0.9222	High	11.54	12.1	4.167	37.88	0.8903	High	11.54	12.1	5.772	52.47	0.9116	High	11.54
APO	212	221	WKKIANNCIF	10.39	2	8	10.45	10.52	2.17	27.127	0.9109	High	10.45	10.51	2.026	25.321	0.9106	High	10.45	10.51	2.102	26.279	0.9247	High	10.45	10.52	3.295	41.187	0.9302	High	10.45	10.52	3.164	39.545	0.9359	High	10.45	10.52	3.191	39.885	0.924	High	10.47	10.56	4.799	59.99	0.8902	High	10.45
APO	222	232	IVIHRSTTSQT	4.59	2	9	4.77	4.85	3.205	35.61	0.9312	Medium	4.63	4.73	3.012	33.467	0.9526	Medium	4.63	4.73	3.056	33.954	0.9434	Medium	4.64	4.73	3.28	36.45	0.9485	Medium	4.64	4.73	3.366	37.405	0.9313	Medium	4.64	4.73	3.188	35.421	0.941	Medium	4.64	4.73	3.461	38.453	0.9438	Medium	4.64
APO	223	233	VIHRSTTSQTI	4.58	3	9	4.74	4.82	3.299	36.66	0.8888	Medium	4.54	4.92	3.327	36.966	0.86	Medium	4.54	4.92	3.341	37.124	0.8546	Medium	4.55	4.92	3.293	36.586	0.8993	Medium	4.55	4.93	3.352	37.25	0.8496	Medium	4.66	4.72	3.238	35.983	0.9246	Medium	4.72	4.8	3.458	38.423	0.8442	Medium	4.8
APO	232	245	TIKVSPDDTPGAIL	10.16	2	10	10.12	10.13	1.392	13.919	0.8355	Medium	10.12	10.13	1.375	13.754	0.9076	Medium	10.12	10.13	1.424	14.237	0.9009	Medium	10.12	10.13	2.218	22.182	0.8674	Medium	10.12	10.13	2.202	22.017	0.8264	Medium	10.12	10.13	2.167	21.674	0.8734	Medium	10.12	10.13	3.118	31.177	0.8409	Medium	10.12
APO	233	245	IKVSPDDTPGAIL	9.99	2	9	9.79	10.26	1.057	11.743	0.9296	High	9.78	10.25	0.973	10.815	0.9292	High	9.78	10.25	1.01	11.224	0.9304	High	9.78	10.25	1.32	14.664	0.9271	High	9.79	10.26	1.274	14.158	0.9262	High	9.79	10.26	1.307	14.526	0.9253	Medium	9.79	10.26	2.247	24.963	0.9254	High	9.79
APO	249	269	FTKMAKKKSLMDIPESQSEQD	7.24	4	18	7.49	7.57	10.131	56.283	0.9179	High	7.39	7.46	9.828	54.601	0.9162	High	7.19	7.73	9.754	54.187	0.9361	High	7.19	7.74	11.084	61.579	0.9204	High	7.19	7.74	10.95	60.835	0.9285	High	7.3	7.72	11.256	62.533	0.8587	High	7.19	7.74	11.247	62.481	0.9323	High	7.19
APO	270	278	FVLRVCGRD	8.8	3	7	8.91	9	0.351	5.009	0.8602	Medium	8.91	8.99	0.295	4.208	0.8805	Medium	8.91	8.99	0.25	3.576	0.896	Medium	8.91	9	0.411	5.878	0.8833	Medium	8.91	9	0.408	5.83	0.858	Medium	8.91	9	0.343	4.904	0.8982	Medium	8.91	9	0.905	12.935	0.8684	Medium	8.91
APO	270	281	FVLRVCGRDEYL	11.08	3	10	11.1	11.21	0.277	2.774	0.8338	Medium	11.1	11.2	0.2	2.003	0.9081	Medium	11.1	11.2	0.213	2.133	0.9068	Medium	11.1	11.2	0.367	3.673	0.851	Medium	11.11	11.21	0.335	3.346	0.6822	Medium	11.11	11.21	0.27	2.704	0.9068	Medium	11.1	11.2	0.741	7.408	0.8681	Medium	11.1
APO	282	291	VGETPIKNFQ	8	1	7	8	8.09	0.718	10.255	0.9029	Medium	7.99	8.09	0.703	10.04	0.9103	High	7.99	8.09	0.707	10.094	0.9044	Medium	8	8.09	0.708	10.115	0.9038	High	8	8.09	0.731	10.448	0.874	Medium	8	8.09	0.774	11.057	0.8618	Medium	8	8.09	0.785	11.215	0.9199	High	7.99
APO	282	291	VGETPIKNFQ	8	2	7	7.84	8.35	0.733	10.464	0.9248	High	7.83	8.35	0.653	9.325	0.916	High	7.84	8.35	0.669	9.557	0.9193	High	7.84	8.35	0.663	9.476	0.9199	High	7.84	8.35	0.645	9.219	0.9232	High	7.84	8.35	0.684	9.778	0.9133	High	7.84	8.35	0.757	10.816	0.9185	High	7.83
APO	282	307	VGETPIKNFQWVRHCLKNGEEIHVVL	11.24	4	23	11.26	11.35	1.497	6.507	0.8755	Medium	11.25	11.34	1.225	5.327	0.8939	Medium	11.25	11.35	1.298	5.643	0.9011	Medium	11.25	11.35	3.693	16.055	0.8701	Medium	11.42	11.5	3.338	14.512	0.8042	Medium	11.26	11.35	3.358	14.601	0.9121	Medium	11.25	11.35	4.837	21.032	0.8706	Medium	11.25
APO	292	302	WVRHCLKNGEE	5.33	3	9	5.45	5.56	0.851	9.459	0.9551	High	5.45	5.56	0.705	7.837	0.9447	High	5.45	5.56	0.805	8.94	0.9443	High	5.45	5.56	2.055	22.839	0.9572	High	5.45	5.56	2.068	22.98	0.9426	High	5.45	5.56	1.939	21.541	0.9489	High	5.45	5.56	2.318	25.757	0.9473	High	5.45
APO	292	307	WVRHCLKNGEEIHVVL	8.82	4	14	8.75	9.25	1.024	7.312	0.8715	Medium	8.75	9.25	0.722	5.158	0.9032	Medium	8.75	9.25	0.811	5.791	0.8943	Medium	8.75	9.25	2.678	19.13	0.8556	Medium	8.75	9.25	2.466	17.611	0.8753	Medium	8.75	9.25	2.13	15.218	0.9279	Medium	8.75	9.25	3.616	25.825	0.8478	Medium	8.75
APO	308	315	DTPPDPAL	8.37	1	3	8.36	8.44	0.724	24.143	0.8938	Medium	8.3	8.38	0.703	23.441	0.8972	Medium	8.36	8.44	0.74	24.677	0.9088	Medium	8.36	8.44	1.362	45.414	0.9139	Medium	8.36	8.44	1.38	45.994	0.8993	Medium	8.36	8.44	1.396	46.542	0.9091	Medium	8.36	8.44	1.722	57.41	0.8864	Medium	8.35
APO	316	335	DEVRKEEWPLVDDCTGVTGY	12.39	2	17	12.3	12.55	8.08	47.532	0.8701	Medium	12.28	12.63	7.8	45.884	0.7612	Medium	12.29	12.63	7.75	45.588	0.8528	Medium	12.29	12.63	8.785	51.677	0.9125	Medium	12.29	12.63	8.676	51.037	0.9147	High	12.29	12.63	8.654	50.906	0.8594	Medium	12.29	12.63	9.601	56.475	0.9202	Medium	12.29
APO	316	339	DEVRKEEWPLVDDCTGVTGYHEQL	11.9	3	21	11.96	12.03	9.146	43.552	0.8036	Medium	11.96	12.02	9.1	43.333	0.8362	Medium	11.96	12.03	9.06	43.144	0.8176	Medium	11.96	12.03	10.031	47.767	0.7978	Medium	11.96	12.03	10.233	48.728	0.8833	Medium	11.96	12.03	10.12	48.189	0.8488	Medium	11.96	12.03	10.866	51.741	0.7833	Medium	11.96
APO	328	339	DCTGVTGYHEQL	8.95	2	10	8.78	9.03	6.448	64.477	0.8041	Medium	8.78	9.03	6.197	61.971	0.8703	Medium	8.78	9.03	6.354	63.536	0.8702	Medium	8.78	9.03	6.68	66.798	0.8558	Medium	8.78	9.03	6.666	66.661	0.8342	Medium	8.78	9.03	6.683	66.832	0.8706	Medium	8.78	9.03	6.873	68.733	0.7526	Medium	8.77
APO	336	350	HEQLTIHGKDHESVF	7.44	3	13	7.38	7.86	5.287	40.668	0.8578	Medium	7.37	7.85	4.491	34.543	0.906	Medium	7.37	7.85	4.504	34.644	0.9124	Medium	7.38	7.85	5.607	43.13	0.8538	Medium	7.38	7.86	5.544	42.644	0.8262	Medium	7.38	7.86	4.633	35.642	0.9042	Medium	7.38	7.86	5.762	44.32	0.8762	Medium	7.37
APO	340	350	TIHGKDHESVF	6.75	2	9	6.76	6.86	2.428	26.978	0.9114	High	6.75	6.85	2.364	26.272	0.8944	High	6.75	6.85	2.36	26.223	0.9179	High	6.75	6.86	2.537	28.191	0.9291	High	6.76	6.86	2.617	29.073	0.8909	Medium	6.76	6.86	2.476	27.508	0.9007	High	6.76	6.86	2.507	27.86	0.9078	High	6.75
APO	355	379	WDCDRKFRVKIRGIDIPVLPRNTDL	10.43	5	21	10.59	10.69	3.736	17.791	0.8477	Medium	10.59	10.68	3.431	16.34	0.8159	Medium	10.59	10.68	3.311	15.767	0.8353	Medium	10.59	10.68	4.41	21.001	0.7726	Medium	10.59	10.69	4.355	20.736	0.7398	Medium	10.59	10.69	4.128	19.658	0.7993	Medium	10.59	10.68	5.962	28.389	0.9081	Medium	10.59
APO	370	379	IPVLPRNTDL	9.61	2	7	9.54	9.62	4.052	57.889	0.8595	Medium	9.53	9.61	4.045	57.785	0.857	Medium	9.53	9.62	4.092	58.453	0.8556	Medium	9.53	9.62	4.78	68.285	0.7825	Medium	9.61	9.69	4.634	66.204	0.7708	Medium	9.53	9.62	4.804	68.634	0.7815	Medium	9.53	9.62	5.542	79.165	0.9067	Medium	9.54
APO	382	394	FVEANIQHGQQVL	9.08	2	11	8.98	9.38	1.477	13.426	0.8887	Medium	8.98	9.37	1.378	12.524	0.9312	High	8.98	9.37	1.5	13.637	0.9172	High	8.98	9.37	2.034	18.49	0.8536	Medium	8.98	9.38	1.977	17.974	0.8443	Medium	8.98	9.38	2.111	19.192	0.8978	Medium	8.98	9.37	2.439	22.177	0.9269	High	8.97
APO	383	394	VEANIQHGQQVL	7.88	2	10	7.72	8.3	1.418	14.176	0.8834	Medium	7.72	8.3	1.358	13.575	0.9071	High	7.72	8.3	1.483	14.831	0.9018	Medium	7.72	8.3	2.024	20.239	0.8398	Medium	7.72	8.3	1.924	19.237	0.832	Medium	7.72	8.3	2.057	20.573	0.8729	Medium	7.72	8.3	2.54	25.396	0.9304	High	7.72
APO	395	407	CQRRTSPKPFTEE	5.48	3	9	5.45	5.98	1.198	13.307	0.8812	Medium	5.45	5.98	1.122	12.463	0.8883	Medium	5.45	5.98	1.15	12.783	0.8772	Medium	5.45	5.98	1.798	19.976	0.8698	Medium	5.45	5.98	1.736	19.284	0.8173	Medium	5.45	5.98	1.722	19.133	0.8633	Medium	5.45	5.98	2.848	31.648	0.9518	High	5.45
APO	417	428	SIKIKDLPKGAL	8.16	2	9	8.2	8.29	0.384	4.268	0.9188	Medium	8.2	8.29	0.314	3.484	0.9153	Medium	8.2	8.29	0.355	3.941	0.9304	Medium	8.2	8.29	0.734	8.157	0.9404	Medium	8.2	8.29	0.808	8.978	0.9211	Medium	8.2	8.29	0.789	8.77	0.912	Medium	8.2	8.29	1.807	20.08	0.9342	High	8.19
APO	463	468	YVNLLL	13.37	1	4	13.32	13.41	0.093	2.314	0.7104	Medium	13.41	13.48	0.096	2.405	0.7236	Medium	13.4	13.47	0.113	2.814	0.7052	Medium	13.37	13.45	0.198	4.944	0.7019	Medium	13.44	13.52	0.195	4.887	0.6316	Medium	13.45	13.52	0.17	4.252	0.6652	Medium	13.32	13.41	0.386	9.661	0.8411	Medium	13.32
APO	467	479	LLIDHRFLLRRGE	8.97	4	11	9.03	9.13	0.747	6.788	0.9281	Medium	9.03	9.13	0.719	6.535	0.8898	Medium	9.03	9.13	0.688	6.252	0.9051	High	9.03	9.13	1.623	14.75	0.8589	Medium	9.03	9.13	1.568	14.258	0.7628	Medium	9.03	9.13	1.588	14.432	0.8373	Medium	9.03	9.13	2.55	23.18	0.9292	High	9.03
APO	467	480	LLIDHRFLLRRGEY	9.61	4	12	9.59	9.66	0.784	6.536	0.927	High	9.58	9.66	0.662	5.521	0.9209	Medium	9.58	9.66	0.692	5.763	0.9171	Medium	9.56	9.64	1.699	14.156	0.9164	High	9.59	9.66	1.651	13.76	0.8946	Medium	9.59	9.66	1.552	12.93	0.9025	Medium	9.58	9.66	2.583	21.527	0.9367	High	9.59
APO	485	497	WQISGKGEDQGSF	9.72	2	11	9.86	9.95	6.912	62.832	0.8687	Medium	9.87	9.94	6.027	54.795	0.9065	Medium	9.88	9.94	6.17	56.093	0.9099	Medium	9.88	9.94	6.943	63.118	0.8346	Medium	9.88	9.95	6.832	62.11	0.8504	Medium	9.79	9.86	6.249	56.806	0.8953	Medium	9.88	9.94	7.873	71.576	0.9075	Medium	9.88
APO	498	515	NADKLTSATNPDKENSMS	6	3	15	5.75	6.45	2.897	19.31	0.8901	Medium	5.74	6.45	2.703	18.02	0.921	High	5.74	6.45	2.913	19.42	0.9147	High	5.75	6.45	4.404	29.363	0.8766	Medium	5.75	6.45	4.348	28.989	0.8561	Medium	5.75	6.45	4.266	28.441	0.8873	Medium	5.75	6.45	5.773	38.486	0.928	High	5.75
APO	498	517	NADKLTSATNPDKENSMSIS	7.37	3	17	7.22	7.55	2.987	17.57	0.6537	Medium	7.21	7.54	2.57	15.117	0.726	Medium	7.21	7.54	2.733	16.076	0.7522	Medium	7.22	7.54	3.868	22.753	0.6734	Medium	7.22	7.55	3.979	23.407	0.6054	Medium	7.22	7.55	3.96	23.296	0.7116	Medium	7.22	7.54	5.539	32.58	0.8013	Medium	7.21
APO	520	551	LDNYCHPIALPKHQPTPDPEGDRVRAEMPNQL	8.81	4	24	8.61	9.31	12.08	50.334	0.8871	High	8.61	9.3	11.942	49.758	0.9197	High	8.61	9.31	11.89	49.543	0.9189	High	8.61	9.31	13.58	56.585	0.8815	High	8.61	9.31	13.262	55.259	0.851	Medium	8.61	9.31	13.221	55.086	0.8767	High	8.61	9.31	14.414	60.058	0.9365	High	8.61
APO	523	551	YCHPIALPKHQPTPDPEGDRVRAEMPNQL	8.37	5	21	8.31	8.6	10.975	52.261	0.6771	Medium	8.17	8.62	10.546	50.217	0.7869	Medium	8.17	8.62	10.573	50.349	0.7807	Medium	8.36	8.43	12.274	58.449	0.6873	Medium	8.41	8.49	11.772	56.058	0.6007	Medium	8.42	8.5	11.86	56.475	0.7688	Medium	8.17	8.63	12.949	61.664	0.8347	Medium	8.17
APO	557	573	AIIATDPLNPLTAEDKE	10.7	2	13	10.64	10.74	4.844	37.259	0.8752	High	10.64	10.73	4.856	37.352	0.9109	High	10.64	10.73	4.832	37.169	0.9065	High	10.64	10.73	6.94	53.388	0.9144	High	10.64	10.74	7.095	54.58	0.8029	Medium	10.64	10.74	7.094	54.568	0.885	High	10.64	10.73	9.396	72.275	0.9147	High	10.64
APO	557	578	AIIATDPLNPLTAEDKELLWHF	13.73	3	18	13.67	13.76	4.895	27.197	0.7833	Medium	13.72	13.8	5.034	27.968	0.7307	Medium	13.67	13.76	4.658	25.877	0.708	Medium	13.67	13.76	8.069	44.829	0.8187	Medium	13.85	13.92	8.019	44.552	0.7671	Medium	13.74	13.81	7.654	42.52	0.727	Medium	13.67	13.76	11.979	66.551	0.8642	Medium	13.67
APO	558	571	IIATDPLNPLTAED	11.47	1	10	11.42	11.51	4.311	43.109	0.6675	Medium	11.47	11.55	4.426	44.258	0.7308	Medium	11.41	11.51	4.414	44.141	0.7491	Medium	11.41	11.51	5.88	58.803	0.7793	Medium	11.42	11.51	5.956	59.561	0.7151	Medium	11.42	11.51	5.773	57.725	0.7422	Medium	11.41	11.51	7.274	72.743	0.8068	Medium	11.48
APO	558	573	IIATDPLNPLTAEDKE	10.38	2	12	10.49	10.58	4.596	38.301	0.8227	Medium	10.49	10.57	4.696	39.131	0.8381	Medium	10.49	10.57	4.592	38.266	0.8183	Medium	10.49	10.57	6.349	52.91	0.8039	Medium	10.49	10.58	6.403	53.357	0.7941	Medium	10.49	10.58	6.48	53.998	0.8002	Medium	10.49	10.57	8.446	70.386	0.8148	Medium	10.49
APO	558	578	IIATDPLNPLTAEDKELLWHF	13.68	3	17	13.49	13.96	4.508	26.517	0.8823	High	13.48	13.95	4.6	27.057	0.8474	Medium	13.49	13.96	4.734	27.85	0.8883	Medium	13.49	13.95	7.298	42.931	0.9202	High	13.49	13.96	7.067	41.573	0.8205	Medium	13.49	13.96	7.157	42.1	0.8707	Medium	13.49	13.96	10.873	63.961	0.9118	High	13.48
APO	559	573	IATDPLNPLTAEDKE	9.92	2	11	9.87	9.9	4.864	44.216	0.6757	Medium	9.87	9.89	4.859	44.169	0.7735	Medium	9.87	9.89	4.829	43.902	0.7572	Medium	9.87	9.89	6.522	59.289	0.7636	Medium	9.87	9.9	6.073	55.207	0.6374	Medium	9.87	9.9	6.299	57.265	0.7281	Medium	9.87	9.89	8.161	74.187	0.7443	Medium	9.87
APO	574	578	LLWHF	13.11	2	3	13.1	13.18	0.44	14.654	0.9176	High	13.1	13.17	0.466	15.527	0.8996	High	13.1	13.18	0.422	14.057	0.9208	High	13.1	13.17	0.864	28.789	0.9292	High	13.1	13.18	0.83	27.679	0.8858	Medium	13.1	13.18	0.857	28.565	0.9327	High	13.1	13.18	1.59	53.006	0.9396	High	13.15
APO	579	592	RYESLKHPKAYPKL	6.32	4	10	6.37	6.47	1.974	19.743	0.9148	High	6.36	6.47	1.867	18.667	0.9093	Medium	6.36	6.47	1.786	17.855	0.9345	Medium	6.37	6.47	3.653	36.532	0.9182	High	6.46	6.55	3.584	35.843	0.9181	High	6.37	6.47	3.451	34.509	0.9113	Medium	6.37	6.47	5.296	52.957	0.8779	Medium	6.37
APO	602	607	EIVAKT	4.54	1	4	4.6	4.69	0.745	18.636	0.9324	Medium	4.58	4.66	0.833	20.831	0.9249	Medium	4.59	4.68	0.775	19.373	0.9242	Medium	4.63	4.71	1.727	43.167	0.9211	Medium	4.66	4.75	1.748	43.69	0.9192	Medium	4.64	4.73	1.703	42.572	0.9116	Medium	4.6	4.69	3.257	81.43	0.9322	Medium	4.64
APO	611	622	LARREVWDQSAL	9.4	2	10	9.33	9.43	6.417	64.169	0.9116	Medium	9.33	9.42	6.305	63.051	0.8954	Medium	9.33	9.42	6.339	63.389	0.909	Medium	9.33	9.42	6.792	67.92	0.9126	Medium	9.33	9.43	6.861	68.606	0.8668	Medium	9.33	9.43	6.742	67.419	0.877	Medium	9.33	9.42	6.865	68.648	0.9154	High	9.33
APO	612	622	ARREVWDQSAL	9.08	3	9	9.13	9.22	5.939	65.985	0.9326	High	9.13	9.22	5.855	65.057	0.9088	High	9.13	9.22	5.942	66.025	0.909	High	9.13	9.22	6.09	67.662	0.944	High	9.13	9.23	6.103	67.811	0.9005	Medium	9.13	9.22	6.114	67.935	0.9118	High	9.13	9.22	6.159	68.436	0.9509	High	9.13
APO	623	630	DVGLTMQL	11.91	2	6	12.11	12.19	1.171	19.521	0.8203	Medium	12.11	12.18	1.049	17.491	0.8732	Medium	12.11	12.19	1.084	18.066	0.9202	Medium	12.11	12.18	2.341	39.009	0.8459	Medium	12.2	12.28	2.367	39.455	0.8252	Medium	11.99	12.08	2.09	34.835	0.8572	Medium	12.11	12.19	4.062	67.703	0.84	Medium	12.11
APO	631	635	LDCNF	10.64	1	3	10.69	10.77	0.579	19.295	0.91	Medium	10.68	10.76	0.584	19.466	0.8838	Medium	10.65	10.72	0.621	20.715	0.9124	Medium	10.68	10.77	1.103	36.758	0.9359	Medium	10.69	10.77	1.099	36.622	0.9382	Medium	10.69	10.77	1.117	37.223	0.9315	Medium	10.68	10.77	1.957	65.222	0.9344	Medium	10.68
APO	636	642	SDENVRA	4.34	1	5	4.41	4.45	0.817	16.343	0.8965	Medium	4.36	4.39	0.812	16.241	0.883	Medium	4.36	4.39	0.853	17.067	0.8901	Medium	4.4	4.42	1.308	26.17	0.904	Medium	4.42	4.45	1.411	28.226	0.8103	Medium	4.36	4.39	1.364	27.274	0.8665	Medium	4.36	4.39	2.584	51.673	0.8924	Medium	4.36
APO	643	650	IAVQKLES	6.86	1	6	6.85	6.87	0.813	13.549	0.7968	Medium	6.84	6.86	0.795	13.257	0.8162	Medium	6.84	6.86	0.758	12.628	0.8144	Medium	6.85	6.86	1.059	17.658	0.8204	Medium	6.85	6.87	1.229	20.484	0.7197	Medium	6.85	6.86	0.97	16.17	0.7682	Medium	6.85	6.86	1.685	28.08	0.7586	Medium	6.84
APO	643	651	IAVQKLESL	9.62	1	7	9.43	9.8	0.859	12.266	0.8693	Medium	9.43	9.8	0.818	11.68	0.9051	Medium	9.43	9.8	0.865	12.355	0.902	Medium	9.43	9.8	1.036	14.793	0.898	Medium	9.43	9.8	1.014	14.491	0.8462	Medium	9.43	9.8	1.055	15.065	0.8844	Medium	9.43	9.8	1.924	27.485	0.8412	Medium	9.44
APO	643	654	IAVQKLESLEDD	9.34	2	10	9.27	9.35	1.687	16.868	0.8282	Medium	9.26	9.35	1.748	17.477	0.9074	Medium	9.26	9.35	1.854	18.535	0.8927	Medium	9.26	9.35	2.508	25.08	0.902	Medium	9.35	9.43	2.453	24.532	0.8369	Medium	9.27	9.35	2.497	24.973	0.8967	Medium	9.27	9.35	3.616	36.162	0.8894	Medium	9.27
APO	643	657	IAVQKLESLEDDDVL	11.41	2	13	11.21	11.5	1.878	14.444	0.8104	Medium	11.21	11.49	1.712	13.166	0.8122	Medium	11.21	11.5	1.819	13.99	0.8311	Medium	11.21	11.5	2.46	18.919	0.8224	Medium	11.21	11.5	2.458	18.904	0.7694	Medium	11.21	11.5	2.432	18.705	0.7796	Medium	11.21	11.5	3.611	27.778	0.8	Medium	11.21
APO	652	657	EDDDVL	9.03	1	4	9.09	9.17	0.187	4.677	0.7647	Medium	9.17	9.25	0.217	5.422	0.8233	Medium	9.09	9.17	0.163	4.082	0.7965	Medium	9.09	9.17	0.259	6.463	0.8936	Medium	9.09	9.17	0.251	6.263	0.7738	Medium	9.15	9.24	0.265	6.619	0.882	Medium	9.09	9.17	0.585	14.619	0.8812	Medium	9.08
APO	654	662	DDVLHYLLQ	12.91	2	7	12.91	13.02	0.122	1.738	0.7285	Medium	12.9	13.01	0.137	1.963	0.7946	Medium	12.91	13.02	0.118	1.692	0.7902	Medium	12.91	13.02	0.21	2.998	0.7701	Medium	12.91	13.02	0.268	3.832	0.642	Medium	12.91	13.02	0.341	4.865	0.7515	Medium	12.88	12.97	1.331	19.021	0.7429	Medium	12.91
APO	655	662	DVLHYLLQ	12.82	2	6	12.59	12.95	0.082	1.364	0.7891	Medium	12.59	12.95	0.096	1.606	0.8022	Medium	12.59	12.95	0.11	1.839	0.8217	Medium	12.59	12.95	0.229	3.81	0.7984	Medium	12.59	12.95	0.282	4.698	0.7174	Medium	12.59	12.95	0.297	4.958	0.794	Medium	12.59	12.95	1.292	21.532	0.8237	Medium	12.59
APO	655	663	DVLHYLLQL	14.29	2	7	14.17	14.53	0.161	2.296	0.8587	Medium	14.17	14.52	0.113	1.608	0.8676	Medium	14.18	14.53	0.082	1.164	0.8657	Medium	14.17	14.53	0.28	4	0.8831	Medium	14.18	14.53	0.362	5.176	0.8406	Medium	14.18	14.53	0.322	4.598	0.8478	Medium	14.17	14.53	1.363	19.476	0.9177	Medium	14.17
APO	658	665	HYLLQLVQ	11.67	2	6	11.66	11.68	0.04	0.663	0.6731	Medium	11.65	11.68	0.112	1.863	0.8179	Medium	11.66	11.68	0.098	1.636	0.7977	Medium	11.66	11.68	0.171	2.858	0.7031	Medium	11.66	11.68	0.148	2.466	0.6557	Medium	11.66	11.68	0.205	3.416	0.8049	Medium	11.66	11.68	0.61	10.162	0.674	Medium	11.66
APO	663	677	LVQAVKFEPYHDSAL	9.66	3	12	9.66	9.75	0.476	3.967	0.9252	High	9.66	9.75	0.46	3.835	0.9426	High	9.66	9.75	0.474	3.949	0.9435	High	9.66	9.75	0.814	6.787	0.9381	High	9.66	9.75	0.806	6.714	0.8909	Medium	9.66	9.75	0.798	6.652	0.9089	High	9.66	9.75	1.046	8.718	0.9313	High	9.66
APO	664	677	VQAVKFEPYHDSAL	9.26	2	11	9.12	9.53	0.473	4.3	0.9015	Medium	9.11	9.52	0.434	3.941	0.9394	Medium	9.11	9.52	0.48	4.367	0.9273	Medium	9.11	9.52	0.838	7.617	0.9328	Medium	9.12	9.53	0.844	7.673	0.9148	Medium	9.12	9.53	0.804	7.312	0.9055	Medium	9.11	9.53	1.042	9.477	0.9009	Medium	9.12
APO	666	677	AVKFEPYHDSAL	8.87	2	9	8.86	8.96	0.467	5.186	0.8574	Medium	8.86	8.95	0.434	4.825	0.7852	Medium	8.86	8.95	0.471	5.238	0.8218	Medium	8.86	8.95	0.841	9.348	0.8988	Medium	8.86	8.96	0.76	8.442	0.7937	Medium	8.86	8.96	0.853	9.477	0.808	Medium	8.86	8.95	1.071	11.901	0.9098	Medium	8.86
APO	681	697	LLKRGLRNKRIGHFLFW	10.27	5	15	10.49	10.58	0.093	0.618	0.9478	High	10.49	10.58	0.035	0.235	0.9274	Medium	10.49	10.58	0.037	0.244	0.9426	Medium	10.49	10.58	0.085	0.564	0.9602	High	10.49	10.58	0.089	0.59	0.9486	High	10.49	10.58	0.051	0.341	0.9267	High	10.49	10.58	0.228	1.517	0.9433	High	10.49
APO	698	713	FLRSEIAQSRHYQQRF	7.69	4	14	7.52	7.93	0.669	4.777	0.8858	Medium	7.52	7.93	0.625	4.465	0.8776	Medium	7.52	7.93	0.604	4.312	0.8823	Medium	7.52	7.93	1.027	7.334	0.8903	Medium	7.52	7.93	1.014	7.242	0.9006	Medium	7.52	7.93	0.942	6.726	0.8654	Medium	7.52	7.93	2.529	18.062	0.8997	Medium	7.52
APO	700	713	RSEIAQSRHYQQRF	5.79	4	12	5.77	6.29	0.589	4.906	0.9206	High	5.77	6.29	0.452	3.765	0.9363	High	5.77	6.29	0.426	3.553	0.933	High	5.77	6.29	0.914	7.619	0.9184	High	5.77	6.29	0.885	7.373	0.9286	High	5.77	6.29	0.713	5.94	0.9254	High	5.77	6.29	2.185	18.204	0.9323	High	5.97
APO	714	719	AVILEA	9.26	1	4	9.19	9.33	0.032	0.803	0.8749	Medium	9.19	9.33	0.022	0.543	0.8583	Medium	9.19	9.33	0.033	0.818	0.8651	Medium	9.19	9.33	0.05	1.249	0.8432	Medium	9.19	9.33	0.024	0.596	0.92	Medium	9.19	9.33	0.031	0.779	0.8743	Medium	9.19	9.33	0.036	0.901	0.8103	Medium	9.19
APO	720	729	YLRGCGTAML	9.99	2	8	10.04	10.1	0.275	3.435	0.8731	Medium	10.03	10.09	0.255	3.183	0.8962	Medium	10.04	10.09	0.235	2.936	0.9156	Medium	10.04	10.1	0.683	8.54	0.9218	Medium	10.04	10.1	0.694	8.678	0.8483	Medium	10.04	10.1	0.666	8.319	0.8912	Medium	10.04	10.1	1.354	16.927	0.8803	Medium	10.04
APO	729	737	LHDFTQQVQ	7.59	2	7	7.46	7.65	0.152	2.165	0.8139	Medium	7.46	7.65	0.099	1.413	0.8032	Medium	7.46	7.65	0.106	1.514	0.86	Medium	7.46	7.65	0.095	1.364	0.8819	Medium	7.46	7.65	0.132	1.886	0.8499	Medium	7.46	7.65	0.125	1.792	0.8511	Medium	7.46	7.65	0.137	1.961	0.8244	Medium	7.46
APO	732	737	FTQQVQ	5.63	1	4	5.57	5.69	0.065	1.628	0.8262	Medium	5.57	5.68	0.055	1.369	0.8628	Medium	5.57	5.68	0.101	2.525	0.8552	Medium	5.57	5.69	0.049	1.237	0.9029	Medium	5.57	5.69	0.092	2.308	0.8318	Medium	5.57	5.69	0.114	2.842	0.8654	Medium	5.57	5.69	0.074	1.857	0.8808	Medium	5.57
APO	732	738	FTQQVQV	8.12	1	5	8.25	8.33	0.154	3.077	0.7276	Medium	8.17	8.25	0.09	1.799	0.8968	Medium	8.25	8.32	0.05	1.005	0.9035	Medium	8.17	8.26	0.059	1.176	0.8347	Medium	8.26	8.33	0.083	1.652	0.8067	Medium	8.17	8.26	0.141	2.815	0.7785	Medium	8.23	8.32	0.191	3.818	0.7178	Medium	8.22
APO	742	747	LQKVTL	8.23	1	4	8.2	8.33	0.312	7.791	0.9346	Medium	8.2	8.33	0.265	6.637	0.9506	Medium	8.2	8.33	0.325	8.12	0.9523	Medium	8.2	8.33	1.108	27.693	0.9524	Medium	8.2	8.33	1.069	26.732	0.9398	Medium	8.2	8.33	1.093	27.335	0.9371	Medium	8.2	8.33	2.252	56.31	0.9471	Medium	8.19
APO	748	761	DIKSLSAEKYDVSS	8	2	12	7.87	8.2	9.614	80.116	0.8648	Medium	7.87	8.2	9.529	79.405	0.9215	High	7.87	8.2	9.452	78.764	0.9168	High	7.87	8.2	9.794	81.616	0.8997	High	7.87	8.2	9.539	79.495	0.8568	Medium	7.87	8.2	9.886	82.385	0.89	High	7.87	8.2	9.668	80.569	0.9093	High	7.87
APO	748	767	DIKSLSAEKYDVSSQVISQL	11.14	3	18	10.95	11.35	14.151	78.617	0.8664	Medium	10.94	11.34	14.196	78.864	0.8591	Medium	10.94	11.35	13.81	76.722	0.8982	Medium	10.94	11.35	14.344	79.687	0.8768	Medium	10.95	11.35	14.277	79.315	0.8623	Medium	10.95	11.35	14.31	79.501	0.8962	Medium	10.94	11.35	14.245	79.138	0.8869	Medium	10.94
APO	748	782	DIKSLSAEKYDVSSQVISQLKQKLENLQNSQLPES	12.49	5	32	12.24	12.76	18.612	58.162	0.894	High	12.23	12.75	18.881	59.002	0.8812	High	12.24	12.76	18.703	58.447	0.9013	High	12.24	12.76	23.6	73.75	0.891	High	12.24	12.76	23.047	72.021	0.8847	High	12.24	12.76	23.92	74.749	0.8929	High	12.24	12.76	25.717	80.365	0.8921	High	12.23
APO	755	782	EKYDVSSQVISQLKQKLENLQNSQLPES	12.1	3	25	12.12	12.21	13.551	54.205	0.8174	Medium	12.12	12.21	13.377	53.509	0.8618	Medium	12.12	12.21	13.643	54.573	0.8598	Medium	12.12	12.21	18.299	73.197	0.8466	Medium	12.12	12.21	18.467	73.868	0.8171	Medium	12.12	12.21	18.352	73.41	0.8627	Medium	12.12	12.21	20.258	81.031	0.8599	Medium	12.12
APO	762	782	QVISQLKQKLENLQNSQLPES	10.6	2	18	10.42	10.74	9.027	50.151	0.8517	Medium	10.41	10.73	8.998	49.988	0.9314	Medium	10.41	10.73	9.131	50.73	0.9171	Medium	10.41	10.73	13.843	76.908	0.8892	Medium	10.42	10.74	13.693	76.071	0.8348	Medium	10.42	10.74	13.807	76.703	0.8908	Medium	10.41	10.73	16.048	89.155	0.8447	Medium	10.42
APO	767	782	LKQKLENLQNSQLPES	7.51	2	13	7.36	7.61	4.967	38.208	0.858	Medium	7.36	7.61	4.858	37.371	0.909	Medium	7.36	7.61	5.028	38.673	0.8965	Medium	7.36	7.61	8.288	63.752	0.8784	Medium	7.36	7.61	8.149	62.681	0.8121	Medium	7.36	7.61	8.281	63.7	0.87	Medium	7.36	7.61	10.223	78.641	0.8942	Medium	7.36
APO	768	782	KQKLENLQNSQLPES	7.13	2	12	6.97	7.45	4.685	39.043	0.9497	High	6.96	7.45	4.611	38.424	0.9596	High	6.96	7.45	4.794	39.95	0.9549	High	6.96	7.45	7.625	63.544	0.9525	High	6.97	7.45	7.47	62.249	0.9449	High	6.97	7.45	7.576	63.136	0.9464	High	6.97	7.45	9.428	78.565	0.946	High	6.96
APO	783	796	FRVPYDPGLKAGAL	10.16	3	10	10.22	10.31	0.379	3.79	0.8951	High	10.22	10.3	0.304	3.043	0.8998	High	10.22	10.3	0.293	2.928	0.9092	High	10.22	10.31	0.45	4.504	0.911	High	10.22	10.31	0.46	4.597	0.897	High	10.22	10.31	0.466	4.664	0.9034	High	10.22	10.31	1.666	16.657	0.9093	High	10.22
APO	797	812	AIEKCKVMASKKKPLW	6.81	4	13	7.02	7.1	2.601	20.007	0.8874	Medium	7.04	7.11	2.394	18.416	0.8708	Medium	6.98	7.06	2.16	16.615	0.9414	Medium	6.98	7.07	3.268	25.139	0.9018	Medium	6.98	7.07	3.193	24.559	0.9258	Medium	6.98	7.07	2.731	21.006	0.9478	Medium	6.98	7.07	4.788	36.833	0.882	Medium	6.98
APO	797	815	AIEKCKVMASKKKPLWLEF	10.45	2	16	10.29	10.72	2.308	14.424	0.8889	Medium	10.29	10.71	1.527	9.546	0.9238	Medium	10.29	10.72	1.522	9.51	0.9234	Medium	10.29	10.72	2.858	17.864	0.8789	Medium	10.31	10.72	2.594	16.214	0.8836	Medium	10.31	10.72	1.926	12.036	0.9038	Medium	10.29	10.72	4.465	27.904	0.8807	Medium	10.29
APO	802	815	KVMASKKKPLWLEF	10.71	4	11	10.74	10.83	1.179	10.721	0.8278	Medium	10.83	10.91	1.009	9.173	0.9216	Medium	10.86	10.94	1.049	9.54	0.9128	Medium	10.88	10.95	1.693	15.388	0.9094	Medium	10.92	11	1.623	14.752	0.8976	Medium	10.79	10.85	1.393	12.664	0.841	Medium	10.86	10.94	2.014	18.309	0.8715	Medium	10.78
APO	816	823	KCADPTAL	7.06	1	5	6.88	7.18	1.299	25.984	0.8748	Medium	6.88	7.17	1.208	24.158	0.9188	Medium	6.88	7.17	1.34	26.803	0.9054	Medium	6.88	7.17	2.772	55.447	0.9034	Medium	6.88	7.18	2.724	54.489	0.8814	Medium	6.88	7.18	2.737	54.744	0.9024	Medium	6.88	7.18	3.745	74.907	0.8764	Medium	6.88
APO	816	825	KCADPTALSN	5.74	2	7	5.69	5.78	2.815	40.219	0.9204	Medium	5.68	5.78	2.755	39.353	0.9378	Medium	5.68	5.78	2.849	40.697	0.9229	Medium	5.69	5.78	4.342	62.026	0.9361	Medium	5.69	5.78	4.374	62.481	0.9095	Medium	5.69	5.78	4.382	62.602	0.9223	Medium	5.69	5.78	5.266	75.232	0.9258	Medium	5.75
APO	816	829	KCADPTALSNETIG	8.17	2	11	8.02	8.43	4.221	38.371	0.8433	Medium	8.01	8.42	4.098	37.252	0.9004	Medium	8.01	8.42	4.287	38.97	0.9034	Medium	8.01	8.43	6.2	56.363	0.8756	Medium	8.02	8.43	5.969	54.266	0.8559	Medium	8.02	8.43	6.056	55.059	0.8915	Medium	8.01	8.43	7.555	68.68	0.8389	Medium	8.01
APO	816	842	KCADPTALSNETIGIIFKHGDDLRQDM	11.89	5	24	12.01	12.08	4.1	17.085	0.9127	High	12.01	12.07	4.082	17.008	0.909	High	12.01	12.08	4.208	17.533	0.9174	High	12.01	12.08	6.624	27.599	0.8871	High	12.01	12.08	6.614	27.56	0.8988	High	12.01	12.08	6.732	28.05	0.8842	High	12.01	12.08	8.733	36.387	0.8824	High	12.01
APO	824	829	SNETIG	5.53	1	4	5.54	5.62	1.528	38.208	0.7681	Medium	5.53	5.62	1.54	38.511	0.8057	Medium	5.53	5.62	1.558	38.948	0.8206	Medium	5.54	5.62	2.109	52.733	0.8383	Medium	5.61	5.67	2.055	51.385	0.7792	Medium	5.54	5.61	2.056	51.39	0.7759	Medium	5.54	5.62	2.296	57.4	0.8625	Medium	5.54
APO	824	842	SNETIGIIFKHGDDLRQDM	10.75	4	17	10.86	10.95	1.149	6.756	0.8632	Medium	10.86	10.94	0.85	5.002	0.8902	Medium	10.86	10.94	0.946	5.563	0.9	Medium	10.86	10.94	2.644	15.555	0.858	Medium	10.86	10.95	2.502	14.717	0.8881	Medium	10.86	10.95	2.303	13.549	0.9171	Medium	10.86	10.94	3.84	22.59	0.8332	Medium	10.86
APO	844	848	ILQIL	12.17	1	3	12.2	12.29	0.01	0.342	0.8943	Medium	12.2	12.28	0.001	0.048	0.9133	Medium	12.2	12.29	0.018	0.598	0.9058	Medium	12.2	12.29	0.004	0.143	0.9462	Medium	12.2	12.29	0.007	0.22	0.8998	Medium	12.2	12.29	0.017	0.554	0.8982	Medium	12.2	12.29	0.012	0.39	0.9372	Medium	12.2
APO	849	855	RIMESIW	11.65	2	5	11.6	11.68	0.044	0.875	0.8076	Medium	11.6	11.68	0.102	2.05	0.7737	Medium	11.6	11.68	0.034	0.683	0.8213	Medium	11.6	11.68	0.047	0.946	0.8612	Medium	11.6	11.68	0.155	3.096	0.6944	Medium	11.6	11.68	0.159	3.187	0.7254	Medium	11.6	11.68	0.128	2.553	0.8341	Medium	11.6
APO	849	862	RIMESIWETESLDL	13.25	2	12	13.18	13.39	0.619	5.155	0.8232	Medium	13.17	13.39	0.622	5.186	0.9096	Medium	13.18	13.39	0.607	5.054	0.898	Medium	13.17	13.39	1.133	9.439	0.8479	Medium	13.18	13.4	1.077	8.976	0.7863	Medium	13.18	13.4	1.007	8.391	0.9004	Medium	13.18	13.39	2.361	19.678	0.8271	Medium	13.17
APO	853	862	SIWETESLDL	13.27	2	8	13.36	13.42	0.544	6.799	0.8446	Medium	13.36	13.42	0.469	5.865	0.8507	Medium	13.36	13.42	0.462	5.773	0.903	Medium	13.36	13.42	0.872	10.899	0.8763	Medium	13.36	13.42	0.889	11.113	0.8255	Medium	13.36	13.42	0.757	9.457	0.8889	Medium	13.36	13.42	1.945	24.307	0.8352	Medium	13.36
APO	862	878	LCLLPYGCISTGDKIGM	13.06	3	14	12.97	13.06	0.1	0.713	0.7573	Medium	12.96	13.06	0.26	1.859	0.8376	Medium	12.97	13.06	0.294	2.099	0.8303	Medium	12.97	13.06	0.59	4.213	0.7938	Medium	13.05	13.14	0.608	4.34	0.7417	Medium	12.97	13.06	0.532	3.8	0.7408	Medium	12.97	13.06	1.69	12.071	0.7744	Medium	13.05
APO	863	869	CLLPYGC	11.86	1	4	11.78	11.87	0.145	3.617	0.7925	Medium	11.77	11.86	0.157	3.929	0.8005	Medium	11.77	11.87	0.157	3.93	0.799	Medium	11.77	11.87	0.416	10.412	0.8261	Medium	11.78	11.87	0.353	8.834	0.7144	Medium	11.78	11.87	0.431	10.787	0.7598	Medium	11.77	11.87	0.969	24.231	0.7987	Medium	11.77
APO	863	878	CLLPYGCISTGDKIGM	12.04	2	13	11.9	12.48	0.58	4.459	0.9	Medium	11.9	12.48	0.443	3.406	0.9118	Medium	11.9	12.48	0.422	3.247	0.9022	Medium	11.9	12.48	0.873	6.714	0.9099	Medium	11.9	12.48	0.802	6.168	0.9141	Medium	11.9	12.48	0.786	6.044	0.9157	Medium	11.9	12.48	2.14	16.458	0.908	Medium	11.9
APO	863	880	CLLPYGCISTGDKIGMIE	12.38	2	15	12.4	12.49	0.426	2.839	0.8579	Medium	12.39	12.48	0.363	2.417	0.9171	High	12.4	12.49	0.357	2.38	0.9109	Medium	12.39	12.49	0.752	5.014	0.8753	Medium	12.4	12.49	0.75	4.998	0.9027	High	12.4	12.49	0.615	4.097	0.9012	High	12.4	12.49	1.947	12.981	0.8743	Medium	12.39
APO	865	878	LPYGCISTGDKIGM	10.57	2	12	10.35	10.73	0.595	4.958	0.6686	Medium	10.34	10.72	0.457	3.806	0.7356	Medium	10.35	10.72	0.449	3.742	0.7165	Medium	10.35	10.72	0.785	6.545	0.7011	Medium	10.35	10.73	0.801	6.674	0.6792	Medium	10.35	10.73	0.705	5.877	0.7341	Medium	10.35	10.73	1.899	15.827	0.678	Medium	10.35
APO	879	887	IEIVKDATT	7.08	1	7	7.02	7.39	1.887	26.956	0.9188	Medium	7.02	7.39	1.773	25.327	0.9359	High	7.02	7.39	1.912	27.317	0.9001	Medium	7.02	7.39	2.787	39.811	0.9374	Medium	7.03	7.39	2.763	39.47	0.9295	Medium	7.02	7.39	2.756	39.376	0.9284	High	7.02	7.39	3.799	54.279	0.9079	Medium	7.02
APO	879	889	IEIVKDATTIA	9.23	1	9	9.03	9.3	2.035	22.616	0.8861	Medium	9.03	9.3	1.934	21.489	0.8656	Medium	9.03	9.3	2.042	22.685	0.856	Medium	9.03	9.3	3.027	33.638	0.8966	Medium	9.03	9.3	2.955	32.829	0.885	Medium	9.03	9.3	3.039	33.766	0.8788	Medium	9.03	9.3	4.096	45.515	0.9037	Medium	9.03
APO	881	901	IVKDATTIAKIQQSTVGNTGA	8.37	3	19	8.26	8.55	7.68	40.419	0.8212	Medium	8.25	8.55	7.533	39.648	0.9027	Medium	8.26	8.55	7.516	39.56	0.871	Medium	8.26	8.55	8.487	44.67	0.8695	Medium	8.26	8.55	8.447	44.457	0.8185	Medium	8.26	8.55	8.415	44.289	0.888	Medium	8.26	8.55	9.611	50.583	0.8521	Medium	8.25
APO	888	902	IAKIQQSTVGNTGAF	8.64	2	13	8.54	8.62	6.975	53.655	0.823	Medium	8.53	8.62	7.06	54.304	0.838	Medium	8.53	8.62	7.009	53.918	0.8241	Medium	8.53	8.62	7.98	61.385	0.8729	Medium	8.54	8.62	7.81	60.079	0.7	Medium	8.54	8.62	7.756	59.662	0.7923	Medium	8.63	8.69	8.35	64.229	0.8801	Medium	8.71
APO	888	907	IAKIQQSTVGNTGAFKDEVL	9.51	3	18	9.55	9.62	7.502	41.677	0.8331	Medium	9.55	9.61	7.383	41.014	0.8942	Medium	9.55	9.62	7.287	40.484	0.8873	Medium	9.55	9.62	8.922	49.566	0.8664	Medium	9.55	9.62	8.807	48.927	0.7681	Medium	9.55	9.62	8.815	48.97	0.8707	Medium	9.55	9.62	10.115	56.193	0.8577	Medium	9.55
APO	902	910	FKDEVLNHW	10.1	3	7	9.96	10.28	0.212	3.029	0.8998	Medium	9.96	10.28	0.191	2.725	0.9159	Medium	9.96	10.28	0.209	2.979	0.9132	Medium	9.96	10.28	0.291	4.151	0.9097	Medium	9.96	10.28	0.354	5.059	0.8817	Medium	9.96	10.28	0.313	4.476	0.926	Medium	9.96	10.28	0.913	13.044	0.9097	Medium	9.96
APO	902	924	FKDEVLNHWLKEKSPTEEKFQAA	9.54	4	20	9.4	9.79	1.756	8.781	0.8159	Medium	9.4	9.78	1.542	7.709	0.8858	Medium	9.4	9.78	1.558	7.788	0.8731	Medium	9.4	9.78	2.766	13.829	0.8589	Medium	9.4	9.79	2.582	12.91	0.8251	Medium	9.4	9.79	2.379	11.897	0.8815	Medium	9.4	9.79	4.171	20.856	0.8367	Medium	9.4
APO	908	924	NHWLKEKSPTEEKFQAA	7.08	3	14	7.02	7.23	1.736	12.399	0.7448	Medium	7.01	7.23	1.584	11.317	0.7669	Medium	7.01	7.23	1.695	12.107	0.8338	Medium	7.02	7.23	2.662	19.018	0.8543	Medium	7.02	7.23	2.697	19.266	0.7976	Medium	7.02	7.23	2.544	18.175	0.849	Medium	7.02	7.23	3.552	25.373	0.8315	Medium	7.01
APO	925	934	VERFVYSCAG	9.08	1	8	9.11	9.17	0.169	2.113	0.8502	Medium	9.1	9.17	0.1	1.251	0.8632	High	9.1	9.17	0.137	1.711	0.8659	High	9.11	9.17	0.157	1.965	0.8925	High	9.11	9.17	0.187	2.334	0.771	Medium	9.11	9.17	0.125	1.556	0.8884	High	9.11	9.17	0.207	2.584	0.8665	Medium	9.11
APO	927	934	RFVYSCAG	8.29	1	6	8.3	8.37	0.154	2.559	0.8141	Medium	8.29	8.36	0.083	1.385	0.9017	High	8.29	8.36	0.075	1.249	0.8884	High	8.29	8.36	0.084	1.404	0.86	High	8.29	8.36	0.113	1.891	0.7182	Medium	8.29	8.36	0.047	0.789	0.8788	High	8.29	8.36	0.19	3.163	0.8427	Medium	8.29
APO	935	939	YCVAT	6.8	1	3	6.82	6.92	0.028	0.921	0.9223	Medium	6.82	6.91	0.023	0.757	0.9175	Medium	6.82	6.91	0.025	0.844	0.9211	Medium	6.82	6.91	0.022	0.738	0.9175	High	6.82	6.92	0.032	1.081	0.9004	Medium	6.82	6.92	0.015	0.488	0.9056	Medium	6.82	6.91	0.02	0.677	0.923	High	6.82
APO	940	953	FVLGIGDRHNDNIM	10.54	3	12	10.61	10.7	0.193	1.607	0.9227	High	10.61	10.7	0.175	1.455	0.8998	High	10.61	10.7	0.185	1.544	0.9155	High	10.61	10.7	0.304	2.533	0.9224	High	10.61	10.7	0.324	2.7	0.918	Medium	10.61	10.7	0.276	2.3	0.9065	High	10.61	10.7	0.852	7.1	0.9295	High	10.61
APO	954	960	ITETGNL	7.56	1	5	7.7	7.8	0.309	6.184	0.8817	Medium	7.7	7.79	0.254	5.085	0.9249	Medium	7.7	7.79	0.258	5.164	0.9187	Medium	7.7	7.8	0.787	15.731	0.8952	Medium	7.71	7.8	0.787	15.731	0.9163	Medium	7.7	7.8	0.743	14.853	0.9272	Medium	7.7	7.8	1.414	28.277	0.8936	Medium	7.7
APO	954	961	ITETGNLF	11.33	1	6	11.26	11.35	0.311	5.189	0.8969	Medium	11.3	11.38	0.263	4.388	0.8986	Medium	11.19	11.28	0.397	6.613	0.8102	Medium	11.19	11.28	0.837	13.953	0.9041	Medium	11.34	11.42	0.691	11.508	0.9007	Medium	11.31	11.38	0.75	12.506	0.8934	Medium	11.19	11.28	1.266	21.104	0.8942	Medium	11.3
APO	954	975	ITETGNLFHIDFGHILGNYKSF	13.27	3	20	13.23	13.31	5.66	28.3	0.8725	Medium	13.22	13.31	5.909	29.543	0.8319	Medium	13.23	13.31	5.558	27.79	0.8473	Medium	13.23	13.31	6.442	32.21	0.8376	Medium	13.23	13.31	6.265	31.323	0.7235	Medium	13.23	13.31	6.365	31.823	0.803	Medium	13.23	13.31	6.847	34.233	0.8492	Medium	13.22
APO	954	976	ITETGNLFHIDFGHILGNYKSFL	13.82	4	21	13.73	14.05	6.82	32.476	0.8213	Medium	13.73	14.04	6.923	32.968	0.7011	Medium	13.73	14.05	6.766	32.221	0.7974	Medium	13.73	14.05	7.446	35.457	0.8239	Medium	13.73	14.05	7.18	34.189	0.7171	Medium	13.73	14.05	7.46	35.524	0.7023	Medium	13.73	14.05	8.076	38.455	0.8376	Medium	13.73
APO	954	992	ITETGNLFHIDFGHILGNYKSFLGINKERVPFVLTPDFL	13.93	5	35	13.94	14.04	9.683	27.665	0.8924	High	13.94	14.04	9.916	28.332	0.8261	Medium	13.94	14.04	9.432	26.948	0.8793	High	13.94	14.04	10.817	30.906	0.8823	High	13.94	14.04	10.266	29.332	0.8379	Medium	13.94	14.04	10.655	30.443	0.8203	Medium	13.94	14.04	11.609	33.169	0.8732	High	13.94
APO	961	972	FHIDFGHILGNY	12.72	3	10	12.54	12.98	3.395	33.951	0.8356	Medium	12.53	12.97	3.55	35.505	0.9306	Medium	12.54	12.98	3.517	35.169	0.909	Medium	12.54	12.97	4.118	41.177	0.903	Medium	12.54	12.98	4.034	40.335	0.8498	Medium	12.54	12.98	4.021	40.213	0.9214	Medium	12.54	12.97	4.532	45.323	0.9004	Medium	12.54
APO	961	975	FHIDFGHILGNYKSF	12.39	4	13	12.33	12.51	5.646	43.431	0.7664	Medium	12.33	12.5	5.722	44.016	0.891	Medium	12.33	12.5	5.584	42.951	0.8822	Medium	12.33	12.5	6.27	48.229	0.8452	Medium	12.33	12.51	6.374	49.032	0.7498	Medium	12.33	12.51	6.158	47.367	0.8723	Medium	12.33	12.5	6.667	51.281	0.8451	Medium	12.33
APO	961	976	FHIDFGHILGNYKSFL	13.36	4	14	13.2	13.62	6.636	47.401	0.7467	Medium	13.2	13.62	6.858	48.986	0.8621	Medium	13.2	13.62	6.705	47.891	0.8452	Medium	13.2	13.62	7.292	52.089	0.7959	Medium	13.2	13.62	7.147	51.048	0.7326	Medium	13.2	13.62	7.202	51.44	0.8274	Medium	13.2	13.62	6.564	46.887	0.7696	Medium	13.2
APO	961	992	FHIDFGHILGNYKSFLGINKERVPFVLTPDFL	13.78	5	28	13.72	13.8	9.951	35.539	0.8454	Medium	13.72	13.79	9.78	34.929	0.6579	Medium	13.72	13.8	9.202	32.863	0.789	Medium	13.72	13.8	10.889	38.888	0.8419	Medium	13.72	13.8	10.539	37.639	0.6582	Medium	13.72	13.8	10.452	37.33	0.6878	Medium	13.72	13.8	11.646	41.593	0.8459	Medium	13.72
APO	962	975	HIDFGHILGNYKSF	11.38	3	12	11.31	11.39	6.082	50.681	0.7821	Medium	11.3	11.39	6.018	50.154	0.8453	Medium	11.3	11.39	6.047	50.39	0.8377	Medium	11.3	11.39	6.538	54.487	0.8497	Medium	11.31	11.39	6.728	56.063	0.7405	Medium	11.31	11.39	6.65	55.418	0.8592	Medium	11.3	11.39	6.895	57.462	0.8311	Medium	11.3
APO	973	992	KSFLGINKERVPFVLTPDFL	12.87	4	16	12.79	12.87	4.347	27.17	0.9022	High	12.79	12.86	3.784	23.648	0.9275	High	12.79	12.87	3.689	23.057	0.9235	High	12.79	12.86	4.781	29.884	0.9144	High	12.79	12.87	4.614	28.835	0.9043	High	12.79	12.87	4.126	25.79	0.9203	High	12.79	12.86	5.325	33.279	0.9182	High	12.79
APO	976	992	LGINKERVPFVLTPDFL	13.06	3	13	12.93	13.48	2.687	20.67	0.9392	High	12.93	13.47	2.412	18.553	0.9325	High	12.93	13.48	2.263	17.411	0.9374	High	12.93	13.48	3.059	23.528	0.9321	High	12.93	13.48	2.957	22.747	0.9362	High	12.93	13.48	2.745	21.117	0.9277	High	12.93	13.48	3.575	27.5	0.9319	High	12.93
APO	977	992	GINKERVPFVLTPDFL	12.98	3	12	12.75	13.2	1.947	16.223	0.9093	Medium	12.74	13.2	1.772	14.764	0.9283	Medium	12.75	13.2	1.688	14.068	0.9255	Medium	12.75	13.2	2.344	19.536	0.9255	Medium	12.75	13.2	2.218	18.483	0.9013	Medium	12.75	13.2	2.143	17.856	0.9179	Medium	12.75	13.2	2.809	23.405	0.9283	Medium	12.75
APO	993	1014	FVMGTSGKKTSPHFQKFQDICV	9.54	2	19	9.4	9.75	1.78	9.368	0.8585	Medium	9.4	9.75	1.146	6.031	0.9144	Medium	9.4	9.75	1.041	5.481	0.8993	Medium	9.4	9.75	2.3	12.103	0.895	Medium	9.4	9.75	2.013	10.597	0.8533	Medium	9.4	9.75	1.395	7.342	0.894	Medium	9.4	9.75	3.149	16.575	0.8853	Medium	9.4
APO	1015	1026	KAYLALRHHTNL	6.32	2	10	6.3	6.55	0.373	3.734	0.8265	Medium	6.3	6.54	0.212	2.124	0.9133	Medium	6.3	6.54	0.208	2.081	0.9148	Medium	6.3	6.54	0.379	3.789	0.8729	Medium	6.3	6.55	0.42	4.202	0.7902	Medium	6.3	6.55	0.278	2.783	0.897	Medium	6.3	6.55	0.703	7.025	0.8877	Medium	6.3
APO	1015	1027	KAYLALRHHTNLL	7.62	4	11	7.75	7.81	0.25	2.273	0.7448	Medium	7.74	7.81	0.125	1.14	0.8769	Medium	7.74	7.81	0.097	0.886	0.8921	Medium	7.75	7.81	0.304	2.76	0.8487	Medium	7.75	7.81	0.264	2.403	0.7899	Medium	7.75	7.81	0.187	1.695	0.8793	Medium	7.75	7.81	0.674	6.123	0.8749	Medium	7.74
APO	1017	1026	YLALRHHTNL	6.64	3	8	6.79	6.86	0.268	3.349	0.9118	Medium	6.78	6.85	0.19	2.374	0.9295	Medium	6.79	6.85	0.225	2.813	0.9349	Medium	6.79	6.86	0.361	4.51	0.8897	Medium	6.79	6.86	0.366	4.573	0.9035	Medium	6.79	6.86	0.307	3.834	0.9366	Medium	6.79	6.86	0.682	8.53	0.902	Medium	6.79
APO	1017	1027	YLALRHHTNLL	8.29	2	9	8.2	8.37	0.175	1.941	0.7233	Medium	8.2	8.36	0.168	1.868	0.7404	Medium	8.2	8.36	0.144	1.602	0.7796	Medium	8.2	8.37	0.26	2.889	0.8043	Medium	8.2	8.37	0.164	1.825	0.7306	Medium	8.2	8.37	0.259	2.882	0.7174	Medium	8.2	8.37	0.566	6.288	0.7747	Medium	8.19
APO	1019	1026	ALRHHTNL	4.09	2	6	4.19	4.26	0.428	7.135	0.8694	Medium	4.19	4.26	0.334	5.559	0.9009	Medium	4.19	4.26	0.319	5.316	0.9005	Medium	4.19	4.26	0.42	7.004	0.9344	Medium	4.19	4.26	0.411	6.856	0.893	Medium	4.19	4.26	0.392	6.528	0.8968	Medium	4.19	4.26	0.702	11.696	0.9418	Medium	4.2
APO	1019	1027	ALRHHTNLL	6.22	2	7	6.26	6.44	0.221	3.161	0.8858	Medium	6.26	6.43	0.181	2.587	0.8747	Medium	6.26	6.43	0.165	2.357	0.8803	Medium	6.26	6.44	0.231	3.301	0.9076	Medium	6.26	6.44	0.262	3.739	0.886	Medium	6.26	6.44	0.248	3.545	0.9051	Medium	6.26	6.44	0.568	8.108	0.9018	Medium	6.26
APO	1031	1035	FSMML	13.4	1	3	13.29	13.5	0.022	0.748	0.8975	Medium	13.28	13.5	0.027	0.907	0.8893	Medium	13.29	13.5	0.017	0.571	0.8941	Medium	13.28	13.5	0.029	0.966	0.911	Medium	13.29	13.5	0.007	0.221	0.8565	Medium	13.29	13.51	0.017	0.578	0.8808	Medium	13.28	13.5	0.065	2.177	0.9043	Medium	13.28
APO	1035	1042	LMTGMPQL	11.7	2	5	11.63	11.71	1.716	34.329	0.7141	Medium	11.69	11.75	1.848	36.957	0.8198	Medium	11.69	11.76	1.804	36.087	0.8063	Medium	11.69	11.76	2.566	51.326	0.8661	Medium	11.69	11.76	2.632	52.63	0.6297	Medium	11.81	11.89	2.621	52.427	0.7961	Medium	11.69	11.76	3.261	65.227	0.8324	Medium	11.69
APO	1035	1050	LMTGMPQLTSKEDIEY	10.99	2	13	10.75	11.14	4.979	38.298	0.8346	Medium	10.75	11.13	4.517	34.743	0.8851	Medium	10.75	11.14	4.473	34.405	0.8695	Medium	10.75	11.14	7.034	54.109	0.8583	Medium	10.75	11.14	6.861	52.776	0.8296	Medium	10.75	11.14	6.384	49.107	0.8557	Medium	10.75	11.14	9.339	71.836	0.898	Medium	10.75
APO	1036	1042	MTGMPQL	11.2	1	4	10.87	11.12	2.01	50.243	0.7831	Medium	10.87	11.12	1.864	46.604	0.808	Medium	10.87	11.12	1.949	48.718	0.7791	Medium	10.87	11.12	2.84	71.007	0.8416	Medium	10.87	11.12	2.733	68.33	0.7967	Medium	10.87	11.12	2.79	69.754	0.7816	Medium	10.87	11.12	3.31	82.748	0.8198	Medium	10.87
APO	1050	1071	YIRDALTVGKNEEDAKKYFLDQ	9.72	4	20	9.77	9.87	2.61	13.051	0.9238	High	9.77	9.87	2.469	12.347	0.9371	High	9.77	9.87	2.471	12.353	0.9311	High	9.77	9.87	2.847	14.235	0.9291	High	9.77	9.87	2.902	14.511	0.9245	High	9.77	9.87	2.818	14.092	0.9308	High	9.77	9.87	3.629	18.143	0.9232	High	9.77
APO	1051	1069	IRDALTVGKNEEDAKKYFL	9.61	5	17	9.46	9.75	2.316	13.621	0.864	Medium	9.46	9.74	2.018	11.87	0.898	Medium	9.46	9.74	2.051	12.064	0.8802	Medium	9.46	9.74	2.612	15.366	0.8875	Medium	9.46	9.75	2.431	14.299	0.8632	Medium	9.46	9.75	2.382	14.013	0.9129	Medium	9.46	9.74	3.196	18.802	0.8521	Medium	9.46
APO	1051	1071	IRDALTVGKNEEDAKKYFLDQ	9.5	3	19	9.27	9.72	2.592	13.641	0.8922	Medium	9.26	9.72	2.421	12.743	0.9205	High	9.26	9.72	2.442	12.853	0.9133	High	9.26	9.72	2.818	14.83	0.9153	High	9.27	9.72	2.727	14.354	0.9067	Medium	9.27	9.72	2.708	14.252	0.9202	High	9.27	9.72	3.468	18.253	0.8976	Medium	9.27
APO	1051	1073	IRDALTVGKNEEDAKKYFLDQIE	10.45	4	21	10.22	10.62	2.51	11.951	0.8471	Medium	10.22	10.61	2.374	11.306	0.8596	Medium	10.22	10.62	2.375	11.31	0.8574	Medium	10.22	10.62	2.782	13.246	0.8569	Medium	10.22	10.62	2.667	12.699	0.8383	Medium	10.22	10.62	2.617	12.46	0.8454	Medium	10.22	10.62	3.402	16.2	0.8215	Medium	10.22
APO	1072	1084	IEVCRDKGWTVQF	11.18	3	11	11.09	11.16	1.491	13.553	0.8818	High	11.08	11.16	1.324	12.038	0.8983	High	11.09	11.16	1.409	12.805	0.894	High	11.09	11.16	3.539	32.171	0.9283	High	11.09	11.16	3.381	30.736	0.8688	Medium	11.09	11.16	3.285	29.868	0.8886	Medium	11.09	11.16	5.667	51.514	0.9259	High	11.09
APO	1088	1092	LHLVL	11.09	2	3	11	11.08	1.297	43.236	0.8949	Medium	11.02	11.1	1.258	41.925	0.9029	Medium	11.04	11.11	1.3	43.326	0.923	Medium	10.86	10.93	2.604	86.801	0.7436	Medium	10.94	11	2.539	84.631	0.8479	Medium	10.94	11	2.569	85.621	0.9066	Medium	11.02	11.09	2.587	86.224	0.8342	Medium	11.04
+ IPI 549	6	12	YKQPVVL	8.77	1	4	8.68	8.89	3.772	94.29	0.9179	Medium	8.68	8.89	3.604	90.097	0.8986	Medium	8.67	8.88	3.696	92.403	0.9058	Medium	8.68	8.89	3.717	92.916	0.9139	Medium	8.68	8.89	3.811	95.28	0.9177	Medium							8.68	8.89	3.747	93.68	0.9088	Medium	8.68
+ IPI 549	36	41	ELIPIE	10.59	1	3	10.64	10.73	0.045	1.488	0.9108	Medium	10.64	10.73	0.051	1.701	0.9003	Medium	10.64	10.73	0.044	1.462	0.9076	Medium	10.64	10.74	0.062	2.073	0.904	Medium	10.64	10.73	0.067	2.23	0.9122	Medium							10.64	10.74	0.26	8.681	0.9021	Medium	10.64
+ IPI 549	36	42	ELIPIEF	13.88	1	4	13.86	13.96	0.099	2.478	0.8325	Medium	13.94	14.02	0.062	1.549	0.7391	Medium	13.92	14.01	0.098	2.44	0.8044	Medium	13.86	13.96	0.127	3.18	0.8511	Medium	13.94	14.02	0.07	1.745	0.781	Medium							13.87	13.96	0.387	9.685	0.826	Medium	13.86
+ IPI 549	42	58	FVLPTSQRKCKSPETAL	8.48	3	13	8.57	8.66	4.569	35.147	0.7893	Medium	8.09	8.77	4.445	34.19	0.8826	Medium	8.31	8.59	4.354	33.493	0.939	High	8.09	8.77	5.814	44.726	0.9333	High	8.38	8.48	5.661	43.545	0.9485	High							8.49	8.58	6.584	50.649	0.9253	High	8.32
+ IPI 549	42	59	FVLPTSQRKCKSPETALL	9.43	3	14	9.26	9.7	4.514	32.24	0.9119	Medium	9.26	9.7	3.917	27.981	0.9185	Medium	9.25	9.7	3.747	26.762	0.924	High	9.26	9.7	5.367	38.336	0.917	Medium	9.26	9.7	4.922	35.159	0.9241	High							9.26	9.7	6.392	45.655	0.9222	Medium	9.26
+ IPI 549	59	70	LHVAGHGNVEQM	6.54	2	10	6.78	6.86	1.518	15.176	0.8402	Medium	6.78	6.87	1.557	15.575	0.8161	Medium	6.78	6.87	1.691	16.911	0.833	Medium	6.78	6.87	1.844	18.44	0.8823	Medium	6.78	6.86	1.728	17.284	0.8966	Medium							6.78	6.86	2.416	24.164	0.8894	Medium	6.78
+ IPI 549	59	72	LHVAGHGNVEQMKA	5.97	2	12	5.9	6.06	0.739	6.159	0.8729	Medium	5.9	6.06	0.607	5.062	0.816	Medium	5.9	6.06	0.548	4.571	0.8804	Medium	5.9	6.06	1.348	11.229	0.9062	Medium	5.9	6.06	1.103	9.189	0.878	Medium							5.9	6.06	2.096	17.47	0.9051	Medium	5.9
+ IPI 549	60	70	HVAGHGNVEQM	5.29	2	9	5.31	5.42	0.662	7.36	0.9115	High	5.31	5.42	0.53	5.884	0.8924	High	5.31	5.42	0.598	6.642	0.9338	High	5.31	5.42	1.223	13.593	0.9362	High	5.31	5.42	1.24	13.777	0.9439	High							5.31	5.42	1.885	20.94	0.9233	High	5.31
+ IPI 549	60	74	HVAGHGNVEQMKAQV	5.94	3	13	5.9	6.23	0.77	5.924	0.7826	Medium	5.9	6.24	0.467	3.595	0.7914	Medium	5.9	6.24	0.587	4.516	0.8029	Medium	5.9	6.24	1.21	9.305	0.8051	Medium	5.9	6.23	1.091	8.39	0.7806	Medium							5.9	6.23	1.887	14.516	0.8359	Medium	5.9
+ IPI 549	60	75	HVAGHGNVEQMKAQVW	8.28	3	14	8.16	8.48	0.513	3.667	0.7753	Medium	8.16	8.49	0.336	2.403	0.7808	Medium	8.15	8.48	0.325	2.324	0.8735	Medium	8.16	8.49	0.843	6.021	0.8608	Medium	8.16	8.48	0.625	4.465	0.8851	Medium							8.16	8.49	1.583	11.307	0.8377	Medium	8.16
+ IPI 549	71	76	KAQVWL	10.59	2	4	10.64	10.71	0.062	1.554	0.9377	Medium	10.64	10.71	0.078	1.938	0.9285	Medium	10.64	10.71	0.049	1.227	0.9575	Medium	10.64	10.71	0.039	0.974	0.9582	Medium	10.64	10.71	0.058	1.439	0.9586	Medium							10.64	10.71	0.065	1.629	0.9453	Medium	10.64
+ IPI 549	77	84	RALETSVA	6.28	2	6	6.14	6.22	2.605	43.416	0.7586	Medium	6.07	6.15	2.496	41.593	0.766	Medium	6.07	6.15	2.475	41.254	0.8732	Medium	6.07	6.15	3.246	54.096	0.8476	Medium	6.1	6.18	3.327	55.448	0.8435	Medium							6.07	6.15	3.88	64.664	0.8329	Medium	6.07
+ IPI 549	79	84	LETSVA	6.27	1	4	6.29	6.37	2.435	60.867	0.8684	Medium	6.15	6.23	2.298	57.451	0.8034	Medium	6.21	6.29	2.346	58.646	0.915	Medium	6.19	6.28	3.189	79.713	0.9307	Medium	6.18	6.28	3.244	81.098	0.917	Medium							6.18	6.28	3.445	86.118	0.9215	Medium	6.18
+ IPI 549	79	86	LETSVAAD	6.15	1	6	5.98	6.38	3.97	66.171	0.8001	Medium	5.98	6.38	3.463	57.717	0.8723	Medium	5.98	6.38	3.707	61.781	0.8891	Medium	5.98	6.38	4.769	79.491	0.8496	Medium	5.98	6.38	4.61	76.828	0.8579	Medium							5.98	6.38	4.955	82.591	0.8259	Medium	5.98
+ IPI 549	87	99	FYHRLGPHHFLLL	10.38	2	10	10.4	10.48	0.476	4.758	0.9099	Medium	10.4	10.48	0.365	3.651	0.8506	Medium	10.4	10.48	0.358	3.584	0.9048	Medium	10.4	10.48	0.785	7.851	0.904	Medium	10.4	10.48	0.654	6.542	0.9161	Medium							10.4	10.48	1.03	10.304	0.8954	Medium	10.4
+ IPI 549	88	98	YHRLGPHHFLL	8.43	4	8	8.58	8.67	0.489	6.115	0.8676	Medium	8.58	8.67	0.356	4.445	0.8863	Medium	8.57	8.66	0.388	4.847	0.9096	Medium	8.58	8.67	0.905	11.309	0.8755	Medium	8.58	8.67	0.827	10.335	0.9134	Medium							8.58	8.67	1.244	15.556	0.8434	Medium	8.58
+ IPI 549	88	99	YHRLGPHHFLLL	9.88	4	9	9.84	10.38	0.483	5.368	0.9269	High	9.85	10.38	0.344	3.823	0.9004	High	9.84	10.38	0.399	4.429	0.9337	High	9.85	10.38	0.858	9.536	0.9332	High	9.84	10.38	0.734	8.154	0.9549	High							9.85	10.38	1.116	12.395	0.9055	High	9.84
+ IPI 549	100	106	YQKKGQW	5.9	1	5	6	6.09	1.739	34.771	0.9162	Medium	6	6.09	1.604	32.079	0.9117	High	6	6.09	1.653	33.058	0.9173	Medium	6	6.09	2.795	55.897	0.9262	High	6	6.09	2.803	56.065	0.9101	Medium							6	6.09	3.097	61.931	0.9166	Medium	6
+ IPI 549	107	113	YEIYDKY	9.1	1	5	8.99	9.18	1.44	28.797	0.8111	Medium	8.99	9.18	1.349	26.986	0.8683	Medium	8.98	9.18	1.322	26.437	0.885	Medium	8.99	9.18	2.221	44.411	0.8101	Medium	8.99	9.18	2.183	43.665	0.8596	Medium							8.99	9.18	2.838	56.766	0.8133	Medium	8.99
+ IPI 549	107	118	YEIYDKYQVVQT	9.45	2	10	9.42	9.5	1.464	14.645	0.8491	Medium	9.41	9.48	1.281	12.813	0.8786	Medium	9.4	9.47	1.28	12.797	0.9067	High	9.41	9.48	2.258	22.582	0.9041	High	9.41	9.47	2.175	21.746	0.9076	High							9.41	9.48	3.602	36.024	0.8883	Medium	9.41
+ IPI 549	107	121	YEIYDKYQVVQTLDC	11.03	2	13	11.17	11.25	2.757	21.206	0.9051	Medium	11.13	11.22	2.579	19.842	0.9386	Medium	11.13	11.22	2.445	18.809	0.9415	Medium	11.13	11.22	3.468	26.674	0.9052	Medium	11.13	11.22	3.37	25.925	0.9252	Medium							11.13	11.22	4.95	38.079	0.8972	Medium	11.13
+ IPI 549	114	119	QVVQTL	8.16	1	4	8.17	8.27	0.059	1.476	0.8592	Medium	8.18	8.27	0.074	1.854	0.8175	Medium	8.17	8.26	0.056	1.396	0.8907	Medium	8.18	8.27	0.063	1.572	0.8797	Medium	8.17	8.27	0.054	1.35	0.8098	Medium							8.17	8.27	0.229	5.733	0.8245	Medium	8.17
+ IPI 549	122	137	LRYWKATHRSPGQIHL	7.45	4	13	7.44	7.95	0.827	6.358	0.9111	Medium	7.44	7.95	0.587	4.518	0.9115	Medium	7.44	7.94	0.504	3.877	0.917	Medium	7.45	7.95	1.799	13.84	0.9108	Medium	7.44	7.95	1.397	10.746	0.904	Medium							7.44	7.95	3.279	25.222	0.9035	Medium	7.44
+ IPI 549	125	137	WKATHRSPGQIHL	6.9	3	10	6.81	6.88	0.938	9.383	0.8894	Medium	6.81	6.88	0.999	9.993	0.73	Medium	6.82	6.88	0.667	6.671	0.8833	Medium	6.82	6.88	1.686	16.858	0.9061	Medium	6.81	6.88	1.608	16.081	0.8519	Medium							6.81	6.88	2.17	21.702	0.9043	Medium	6.81
+ IPI 549	138	149	VQRHPPSEESQA	4.07	2	8	3.94	4.38	3.43	42.87	0.9201	Medium	3.94	4.38	3.325	41.558	0.9053	Medium	3.94	4.38	3.214	40.178	0.9345	High	3.94	4.38	4.2	52.506	0.9402	High	3.94	4.38	4.267	53.335	0.933	High							3.94	4.38	5.156	64.449	0.9308	Medium	3.94
+ IPI 549	138	150	VQRHPPSEESQAF	6.68	2	9	6.54	6.95	3.095	34.392	0.8557	Medium	6.54	6.95	3.009	33.429	0.8367	Medium	6.54	6.95	2.848	31.644	0.8744	Medium	6.54	6.95	4.273	47.481	0.8756	Medium	6.54	6.95	4.362	48.466	0.8731	Medium							6.54	6.95	5.308	58.973	0.854	Medium	6.54
+ IPI 549	138	157	VQRHPPSEESQAFQRQLTAL	9.74	4	16	9.55	9.94	2.233	13.956	0.8114	Medium	9.55	9.95	1.886	11.785	0.8346	Medium	9.55	9.94	1.769	11.055	0.8574	Medium	9.55	9.95	3.662	22.889	0.8353	Medium	9.55	9.94	3.36	20.998	0.8328	Medium							9.55	9.95	5.988	37.423	0.8357	Medium	9.55
+ IPI 549	150	157	FQRQLTAL	9.07	2	6	9.05	9.14	0.173	2.891	0.9045	Medium	9.05	9.14	0.207	3.448	0.8992	Medium	9.04	9.14	0.157	2.611	0.9137	Medium	9.05	9.14	0.356	5.926	0.9186	High	9.05	9.14	0.395	6.591	0.9205	Medium							9.05	9.14	1.167	19.445	0.8963	High	9.05
+ IPI 549	151	157	QRQLTAL	7.99	2	5	8.02	8.11	0.158	3.154	0.9257	High	8.02	8.12	0.176	3.512	0.9204	High	8.02	8.11	0.137	2.742	0.9373	High	8.02	8.12	0.329	6.577	0.9416	High	8.02	8.11	0.349	6.989	0.951	High							8.02	8.12	1.063	21.254	0.9437	High	8.02
+ IPI 549	158	164	IGYDVTD	8.21	1	5	8.08	8.32	0.811	16.229	0.8782	Medium	8.08	8.32	0.801	16.015	0.8751	High	8.08	8.31	0.745	14.907	0.9149	High	8.08	8.32	1.105	22.101	0.9124	High	8.08	8.32	1.128	22.57	0.8693	Medium							8.08	8.32	2.418	48.368	0.8945	High	8.08
+ IPI 549	158	173	IGYDVTDVSNVHDDEL	10.34	2	14	10.25	10.33	3.597	25.69	0.9016	Medium	10.26	10.33	3.011	21.51	0.918	High	10.25	10.33	3.215	22.963	0.9373	High	10.26	10.33	4.852	34.655	0.9141	High	10.26	10.33	4.591	32.792	0.9021	Medium							10.26	10.33	6.38	45.57	0.9022	High	10.26
+ IPI 549	158	174	IGYDVTDVSNVHDDELE	9.9	2	15	9.86	9.93	3.634	24.225	0.9041	High	9.86	9.93	2.929	19.526	0.879	Medium	9.86	9.92	3.224	21.492	0.9229	High	9.86	9.93	4.848	32.323	0.9378	High	9.86	9.93	4.628	30.854	0.9047	High							9.86	9.93	6.661	44.404	0.9174	High	9.86
+ IPI 549	161	174	DVTDVSNVHDDELE	8.32	2	12	8.51	8.63	3.284	27.369	0.7872	Medium	8.39	8.49	3.196	26.633	0.7012	Medium	8.21	8.61	3.132	26.099	0.9324	High	8.22	8.62	4.548	37.903	0.9312	High	8.43	8.61	4.414	36.781	0.9114	High							8.46	8.54	5.596	46.637	0.8701	Medium	8.22
+ IPI 549	165	175	VSNVHDDELEF	10.56	2	9	10.44	10.66	1.283	14.258	0.8136	Medium	10.44	10.66	1.127	12.526	0.7755	Medium	10.44	10.66	1.108	12.307	0.847	Medium	10.44	10.66	2.184	24.267	0.8597	Medium	10.44	10.66	2.128	23.649	0.8155	Medium							10.44	10.66	2.793	31.033	0.8437	Medium	10.44
+ IPI 549	174	182	EFTRRGLVT	7.02	2	7	6.99	7.08	0.176	2.512	0.9441	High	6.99	7.08	0.216	3.087	0.9066	High	6.98	7.08	0.188	2.688	0.9499	High	6.99	7.08	0.23	3.289	0.9235	High	6.99	7.08	0.276	3.938	0.9521	High							6.99	7.08	0.646	9.234	0.9575	High	6.99
+ IPI 549	174	185	EFTRRGLVTPRM	7.96	3	9	7.82	8.06	0.034	0.374	0.8146	Medium	7.82	8.06	0.146	1.618	0.8455	Medium	7.82	8.05	0.179	1.993	0.9067	Medium	7.82	8.06	0.268	2.974	0.8778	Medium	7.82	8.06	0.242	2.684	0.8886	Medium							7.82	8.06	0.626	6.952	0.8945	Medium	7.82
+ IPI 549	174	187	EFTRRGLVTPRMAE	7.6	2	11	7.54	7.63	0.355	3.227	0.7518	Medium	7.64	7.71	0.562	5.11	0.8005	Medium	7.54	7.62	0.301	2.739	0.7939	Medium	7.55	7.63	0.332	3.021	0.8721	Medium	7.54	7.63	0.384	3.49	0.6524	Medium							7.55	7.63	0.997	9.063	0.8142	Medium	7.54
+ IPI 549	174	195	EFTRRGLVTPRMAEVASRDPKL	8.28	5	18	8.13	8.45	1.279	7.107	0.8608	Medium	8.13	8.45	1.046	5.814	0.875	Medium	8.13	8.45	1.162	6.458	0.9018	Medium	8.13	8.45	1.946	10.81	0.8733	Medium	8.13	8.45	1.792	9.955	0.883	Medium							8.13	8.45	3.782	21.01	0.8428	Medium	8.13
+ IPI 549	175	182	FTRRGLVT	6.2	2	6	6.13	6.34	0.151	2.518	0.8792	Medium	6.13	6.34	0.256	4.271	0.8548	Medium	6.14	6.35	0.21	3.5	0.9077	Medium	6.13	6.34	0.234	3.904	0.9091	Medium	6.13	6.34	0.259	4.312	0.9043	Medium							6.13	6.34	0.681	11.347	0.8999	Medium	6.13
+ IPI 549	176	182	TRRGLVT	4.73	2	5	4.86	4.95	0.166	3.316	0.8998	Medium	4.86	4.95	0.183	3.67	0.9073	Medium	4.86	4.95	0.156	3.127	0.9544	Medium	4.86	4.95	0.219	4.374	0.9271	Medium	4.86	4.95	0.248	4.956	0.9434	Medium							4.86	4.95	0.609	12.17	0.9244	Medium	4.81
+ IPI 549	176	185	TRRGLVTPRM	6.49	2	7	6.5	6.6	0.206	2.947	0.8429	Medium	6.5	6.6	0.298	4.259	0.7712	Medium	6.51	6.6	0.193	2.755	0.8667	Medium	6.5	6.6	0.266	3.801	0.9131	High	6.5	6.6	0.306	4.365	0.8347	Medium							6.5	6.6	0.644	9.207	0.9337	High	6.5
+ IPI 549	183	195	PRMAEVASRDPKL	6.78	3	10	6.66	6.99	1.306	13.063	0.8796	Medium	6.66	6.99	1.236	12.364	0.8602	Medium	6.67	6.98	1.224	12.241	0.9066	Medium	6.66	6.99	1.941	19.413	0.9135	Medium	6.66	6.99	2.023	20.227	0.9106	Medium							6.66	6.99	3.399	33.99	0.9044	Medium	6.66
+ IPI 549	186	195	AEVASRDPKL	5.95	2	7	5.87	6.28	1.323	18.899	0.9172	High	5.87	6.28	1.205	17.213	0.9302	High	5.88	6.28	1.227	17.533	0.9404	High	5.87	6.28	1.866	26.65	0.9377	High	5.87	6.28	1.936	27.658	0.936	High							5.87	6.28	3.078	43.967	0.9587	High	5.87
+ IPI 549	188	195	VASRDPKL	5.26	2	5	5.21	5.59	1.267	25.347	0.8001	Medium	5.21	5.59	1.182	23.642	0.7598	Medium	5.21	5.59	1.166	23.319	0.8452	Medium	5.21	5.59	1.801	36.012	0.9137	High	5.21	5.59	1.787	35.731	0.9158	High							5.21	5.59	2.548	50.957	0.9157	Medium	5.21
+ IPI 549	196	211	YAMHPWVTSKPLPEYL	11.65	3	11	11.54	12.1	3.332	30.289	0.9163	High	11.54	12.1	3.162	28.748	0.9124	High	11.54	12.1	3.06	27.82	0.9028	High	11.54	12.1	4.318	39.25	0.9075	High	11.54	12.1	4.25	38.634	0.9044	High							11.54	12.1	5.833	53.03	0.9148	High	11.54
+ IPI 549	212	221	WKKIANNCIF	10.39	2	8	10.46	10.53	2.202	27.528	0.9322	High	10.5	10.58	2	25.004	0.7943	Medium	10.46	10.55	1.915	23.934	0.9165	High	10.45	10.52	3.257	40.708	0.9251	High	10.45	10.52	3.179	39.74	0.9302	High							10.45	10.52	4.821	60.258	0.9134	High	10.45
+ IPI 549	222	232	IVIHRSTTSQT	4.59	2	9	4.73	4.81	3.127	34.74	0.9429	Medium	4.64	4.73	2.999	33.323	0.9308	Medium	4.64	4.73	2.988	33.198	0.9486	Medium	4.64	4.73	3.232	35.908	0.9525	Medium	4.64	4.73	3.25	36.11	0.947	Medium							4.64	4.73	3.533	39.26	0.9539	Medium	4.64
+ IPI 549	223	233	VIHRSTTSQTI	4.58	3	9	4.55	4.92	3.183	35.368	0.8459	Medium	4.55	4.93	3.446	38.288	0.7916	Medium	4.55	4.93	3.289	36.543	0.8555	Medium	4.55	4.93	3.251	36.119	0.9084	Medium	4.55	4.92	3.242	36.018	0.9045	Medium							4.55	4.92	3.542	39.351	0.8694	Medium	4.55
+ IPI 549	232	245	TIKVSPDDTPGAIL	10.16	2	10	10.12	10.13	1.415	14.147	0.8176	Medium	10.12	10.13	1.356	13.564	0.8458	Medium	10.12	10.13	1.252	12.517	0.8831	Medium	10.12	10.13	2.136	21.359	0.8579	Medium	10.12	10.13	2.203	22.034	0.879	Medium							10.12	10.13	3.073	30.726	0.7849	Medium	10.12
+ IPI 549	233	245	IKVSPDDTPGAIL	9.99	2	9	9.78	10.25	1.021	11.34	0.9302	High	9.79	10.26	0.99	11.005	0.9101	Medium	9.78	10.25	0.958	10.642	0.9361	High	9.79	10.26	1.323	14.7	0.9388	High	9.79	10.26	1.288	14.312	0.922	High							9.79	10.26	2.265	25.165	0.9198	High	9.79
+ IPI 549	249	269	FTKMAKKKSLMDIPESQSEQD	7.24	4	18	7.61	7.7	10.407	57.815	0.9005	High	7.23	7.32	9.937	55.207	0.8272	Medium	7.19	7.28	10.173	56.515	0.9392	High	7.19	7.74	11.052	61.401	0.913	High	7.19	7.74	10.688	59.381	0.9158	High							7.53	7.61	11.13	61.833	0.9335	High	7.19
+ IPI 549	270	278	FVLRVCGRD	8.8	3	7	8.91	9	0.259	3.696	0.827	Medium	8.91	9	0.325	4.643	0.8494	Medium	8.91	8.99	0.28	3.999	0.8772	Medium	8.91	9	0.413	5.9	0.854	Medium	8.91	9	0.335	4.789	0.9014	Medium							8.91	9	0.941	13.445	0.8747	Medium	8.91
+ IPI 549	270	281	FVLRVCGRDEYL	11.08	3	10	11.1	11.2	0.213	2.13	0.8208	Medium	11.1	11.2	0.246	2.463	0.9054	Medium	11.1	11.2	0.196	1.964	0.9211	Medium	11.1	11.2	0.337	3.365	0.8731	Medium	11.1	11.2	0.309	3.089	0.8743	Medium							11.11	11.21	0.811	8.111	0.8668	Medium	11.1
+ IPI 549	282	291	VGETPIKNFQ	8	1	7	8	8.09	0.691	9.871	0.9006	Medium	8	8.09	0.69	9.86	0.896	High	7.99	8.09	0.689	9.837	0.9048	High	8	8.09	0.678	9.684	0.9335	High	8	8.09	0.77	10.993	0.8633	Medium							8	8.09	0.768	10.97	0.9117	High	8
+ IPI 549	282	291	VGETPIKNFQ	8	2	7	7.84	8.35	0.651	9.305	0.9222	High	7.84	8.35	0.672	9.593	0.922	High	7.83	8.35	0.642	9.177	0.9227	High	7.84	8.35	0.632	9.029	0.9255	High	7.84	8.35	0.692	9.893	0.9171	High							7.84	8.35	0.752	10.741	0.9276	High	7.84
+ IPI 549	282	307	VGETPIKNFQWVRHCLKNGEEIHVVL	11.24	4	23	11.25	11.35	1.401	6.092	0.8176	Medium	11.26	11.35	1.187	5.162	0.8503	Medium	11.25	11.34	1.136	4.94	0.8815	Medium	11.26	11.35	3.611	15.701	0.8852	Medium	11.25	11.35	3.412	14.835	0.9058	Medium							11.26	11.35	4.869	21.167	0.8694	Medium	11.25
+ IPI 549	292	302	WVRHCLKNGEE	5.33	3	9	5.45	5.56	0.803	8.917	0.9555	High	5.45	5.56	0.632	7.025	0.9204	High	5.46	5.56	0.627	6.964	0.9493	High	5.45	5.56	2.016	22.405	0.9611	High	5.45	5.56	2.019	22.43	0.9502	High							5.45	5.56	2.29	25.447	0.9442	High	5.45
+ IPI 549	292	307	WVRHCLKNGEEIHVVL	8.82	4	14	8.75	9.25	0.989	7.065	0.8648	Medium	8.75	9.25	0.611	4.366	0.885	Medium	8.75	9.24	0.643	4.596	0.9154	Medium	8.75	9.25	2.584	18.459	0.8513	Medium	8.75	9.25	2.12	15.145	0.9203	Medium							8.75	9.25	3.672	26.231	0.8529	Medium	8.75
+ IPI 549	308	315	DTPPDPAL	8.37	1	3	8.3	8.37	0.709	23.631	0.8968	Medium	8.31	8.39	0.657	21.904	0.884	Medium	8.3	8.38	0.645	21.513	0.9082	Medium	8.36	8.44	1.377	45.915	0.9196	Medium	8.36	8.44	1.429	47.638	0.9023	Medium							8.36	8.44	1.754	58.451	0.9039	Medium	8.36
+ IPI 549	316	335	DEVRKEEWPLVDDCTGVTGY	12.39	2	17	12.22	12.61	8.171	48.063	0.8491	Medium	12.55	12.62	8.105	47.677	0.6947	Medium	12.34	12.47	7.83	46.06	0.8212	Medium	12.29	12.63	8.799	51.758	0.9067	Medium	12.29	12.63	8.67	51.002	0.8307	Medium							12.29	12.63	9.694	57.023	0.9181	Medium	12.29
+ IPI 549	316	339	DEVRKEEWPLVDDCTGVTGYHEQL	11.9	3	21	11.96	12.03	9.298	44.275	0.7991	Medium	11.86	11.93	9.388	44.706	0.7977	Medium	11.87	11.96	9.472	45.103	0.8094	Medium	11.96	12.03	10.083	48.016	0.7983	Medium	11.96	12.03	10.033	47.778	0.8351	Medium							11.96	12.03	10.631	50.623	0.7712	Medium	11.96
+ IPI 549	328	339	DCTGVTGYHEQL	8.95	2	10	8.78	9.03	6.64	66.398	0.8	Medium	8.78	9.03	6.295	62.946	0.7961	Medium	8.77	9.03	6.253	62.535	0.8647	Medium	8.78	9.03	6.606	66.062	0.8637	Medium	8.78	9.03	6.64	66.401	0.8724	Medium							8.78	9.03	6.837	68.368	0.7757	Medium	8.78
+ IPI 549	336	350	HEQLTIHGKDHESVF	7.44	3	13	7.38	7.85	5.533	42.562	0.8492	Medium	7.38	7.86	4.328	33.296	0.8588	Medium	7.37	7.85	4.448	34.217	0.8984	Medium	7.38	7.86	5.559	42.762	0.8754	Medium	7.38	7.85	4.791	36.857	0.8853	Medium							7.38	7.86	5.839	44.914	0.875	Medium	7.38
+ IPI 549	340	350	TIHGKDHESVF	6.75	2	9	6.75	6.86	2.462	27.355	0.9064	High	6.76	6.86	2.23	24.78	0.8915	Medium	6.76	6.86	2.29	25.444	0.9042	High	6.76	6.86	2.497	27.749	0.9236	High	6.76	6.86	2.566	28.516	0.9039	High							6.76	6.86	2.564	28.49	0.9258	High	6.75
+ IPI 549	355	379	WDCDRKFRVKIRGIDIPVLPRNTDL	10.43	5	21	10.59	10.68	3.586	17.077	0.784	Medium	10.59	10.68	3.036	14.457	0.7803	Medium	10.59	10.68	3.156	15.03	0.8212	Medium	10.59	10.68	4.475	21.312	0.797	Medium	10.59	10.68	4.255	20.264	0.8502	Medium							10.59	10.69	5.779	27.517	0.9021	Medium	10.59
+ IPI 549	370	379	IPVLPRNTDL	9.61	2	7	9.47	9.54	3.835	54.786	0.7277	Medium	9.54	9.62	3.749	53.563	0.717	Medium	9.53	9.61	3.94	56.288	0.8579	Medium	9.47	9.54	4.704	67.196	0.7307	Medium	9.53	9.62	4.775	68.218	0.8235	Medium							9.53	9.62	5.583	79.758	0.8789	Medium	9.53
+ IPI 549	382	394	FVEANIQHGQQVL	9.08	2	11	8.98	9.37	1.359	12.356	0.8364	Medium	8.98	9.38	1.198	10.89	0.8703	Medium	8.98	9.37	1.288	11.71	0.9096	Medium	8.98	9.38	2.067	18.791	0.8854	Medium	8.98	9.37	2.115	19.231	0.9136	Medium							8.98	9.38	2.429	22.079	0.9153	High	8.98
+ IPI 549	383	394	VEANIQHGQQVL	7.88	2	10	7.72	8.3	1.326	13.26	0.8397	Medium	7.72	8.3	1.23	12.295	0.8371	Medium	7.72	8.3	1.28	12.801	0.8892	Medium	7.72	8.3	2.063	20.635	0.8469	Medium	7.72	8.3	2.104	21.035	0.9002	Medium							7.72	8.3	2.536	25.356	0.9118	High	7.72
+ IPI 549	395	407	CQRRTSPKPFTEE	5.48	3	9	5.45	5.98	1.094	12.154	0.8345	Medium	5.61	5.77	0.916	10.182	0.8733	Medium	5.46	5.98	1.052	11.686	0.8785	Medium	5.45	5.98	1.803	20.031	0.8884	Medium	5.45	5.98	1.782	19.795	0.8897	Medium							5.45	5.98	2.881	32.013	0.9408	High	5.45
+ IPI 549	417	428	SIKIKDLPKGAL	8.16	2	9	8.2	8.29	0.297	3.303	0.9485	Medium	8.2	8.29	0.339	3.763	0.9089	Medium	8.19	8.29	0.28	3.113	0.9168	Medium	8.2	8.29	0.706	7.845	0.9355	Medium	8.2	8.29	0.778	8.644	0.9208	Medium							8.2	8.29	1.686	18.732	0.9314	Medium	8.2
+ IPI 549	463	468	YVNLLL	13.37	1	4	13.32	13.41	0.109	2.722	0.6103	Medium	13.43	13.51	0.083	2.068	0.5419	Medium	13.38	13.46	0.089	2.217	0.6646	Medium	13.32	13.41	0.18	4.49	0.674	Medium	13.44	13.51	0.167	4.165	0.6808	Medium							13.32	13.41	0.42	10.5	0.7892	Medium	13.32
+ IPI 549	467	479	LLIDHRFLLRRGE	8.97	4	11	9.03	9.13	0.742	6.744	0.8645	Medium	9.03	9.13	0.523	4.759	0.8372	Medium	9.03	9.13	0.619	5.631	0.8544	Medium	9.03	9.13	1.599	14.537	0.8647	Medium	9.03	9.13	1.579	14.357	0.8775	Medium							9.03	9.13	2.567	23.335	0.9176	High	9.03
+ IPI 549	467	480	LLIDHRFLLRRGEY	9.61	4	12	9.59	9.68	0.75	6.248	0.9169	Medium	9.63	9.74	0.599	4.995	0.8738	Medium	9.58	9.66	0.537	4.474	0.9054	Medium	9.59	9.66	1.684	14.033	0.918	High	9.58	9.66	1.548	12.899	0.9271	Medium							9.58	9.66	2.589	21.578	0.9451	High	9.58
+ IPI 549	485	497	WQISGKGEDQGSF	9.72	2	11	9.88	9.94	6.767	61.516	0.8132	Medium	9.88	9.95	5.786	52.599	0.8543	Medium	9.87	9.94	6.044	54.943	0.8927	Medium	9.88	9.95	6.97	63.363	0.8205	Medium	9.88	9.94	6.193	56.299	0.9093	Medium							9.88	9.95	7.84	71.276	0.8915	Medium	9.88
+ IPI 549	498	515	NADKLTSATNPDKENSMS	6	3	15	5.75	6.45	2.75	18.331	0.8605	Medium	5.75	6.45	2.512	16.747	0.8842	Medium	5.75	6.46	2.616	17.443	0.915	Medium	5.75	6.45	4.348	28.989	0.8916	Medium	5.75	6.45	4.442	29.615	0.9163	Medium							5.75	6.45	5.725	38.168	0.9268	High	5.75
+ IPI 549	498	517	NADKLTSATNPDKENSMSIS	7.37	3	17	7.22	7.54	2.774	16.318	0.5228	Medium	7.22	7.55	2.184	12.849	0.5046	Medium	7.21	7.54	2.517	14.808	0.6931	Medium	7.22	7.55	4.051	23.828	0.691	Medium	7.22	7.54	4.032	23.715	0.7482	Medium							7.22	7.55	5.584	32.846	0.7727	Medium	7.22
+ IPI 549	520	551	LDNYCHPIALPKHQPTPDPEGDRVRAEMPNQL	8.81	4	24	9	9.09	11.985	49.938	0.8826	High	8.61	9.31	11.336	47.233	0.8419	Medium	8.61	9.3	11.535	48.064	0.8813	Medium	8.61	9.31	13.498	56.243	0.8984	High	8.61	9.31	13.302	55.424	0.9074	High							8.61	9.31	14.403	60.011	0.9249	High	8.61
+ IPI 549	523	551	YCHPIALPKHQPTPDPEGDRVRAEMPNQL	8.37	5	21	8.34	8.47	11.181	53.241	0.6156	Medium	8.44	8.53	11.033	52.538	0.6055	Medium	8.38	8.49	11.38	54.192	0.754	Medium	8.18	8.63	12.08	57.523	0.674	Medium	8.39	8.48	12.066	57.459	0.8155	Medium							8.41	8.49	12.581	59.909	0.7364	Medium	8.43
+ IPI 549	557	573	AIIATDPLNPLTAEDKE	10.7	2	13	10.64	10.73	4.767	36.671	0.886	High	10.64	10.73	4.704	36.188	0.8522	High	10.64	10.73	4.486	34.505	0.9103	High	10.64	10.74	6.566	50.505	0.9207	High	10.64	10.73	6.723	51.713	0.903	High							10.64	10.74	9.324	71.727	0.9032	High	10.64
+ IPI 549	557	578	AIIATDPLNPLTAEDKELLWHF	13.73	3	18	13.67	13.76	4.535	25.194	0.8318	Medium	13.84	13.91	4.482	24.901	0.7032	Medium	13.78	13.85	4.243	23.573	0.8123	Medium	13.67	13.76	7.498	41.654	0.8626	Medium	13.67	13.76	7.191	39.951	0.7013	Medium							13.67	13.76	11.852	65.842	0.8547	Medium	13.67
+ IPI 549	558	571	IIATDPLNPLTAED	11.47	1	10	11.41	11.51	4.279	42.794	0.704	Medium	11.41	11.51	4.161	41.609	0.591	Medium	11.45	11.54	4.319	43.189	0.7289	Medium	11.41	11.51	5.703	57.034	0.753	Medium	11.51	11.58	5.731	57.314	0.7336	Medium							11.47	11.54	7.315	73.146	0.7761	Medium	11.49
+ IPI 549	558	573	IIATDPLNPLTAEDKE	10.38	2	12	10.49	10.57	4.301	35.841	0.827	Medium	10.52	10.59	4.544	37.87	0.7833	Medium	10.49	10.57	4.134	34.452	0.8351	Medium	10.49	10.58	6.154	51.281	0.8139	Medium	10.49	10.57	6.349	52.905	0.8263	Medium							10.49	10.58	8.418	70.151	0.7933	Medium	10.49
+ IPI 549	558	578	IIATDPLNPLTAEDKELLWHF	13.68	3	17	13.49	13.96	4.096	24.096	0.8435	Medium	13.49	13.96	4.297	25.277	0.8384	Medium	13.48	13.95	4.198	24.694	0.8672	Medium	13.49	13.96	6.851	40.299	0.931	High	13.49	13.96	6.756	39.743	0.8877	Medium							13.49	13.96	10.727	63.099	0.9174	High	13.49
+ IPI 549	559	573	IATDPLNPLTAEDKE	9.92	2	11	9.87	9.89	4.531	41.19	0.6596	Medium	9.87	9.9	4.73	42.996	0.6081	Medium	9.87	9.89	4.19	38.09	0.7479	Medium	9.87	9.9	6.219	56.54	0.755	Medium	9.87	9.89	5.98	54.364	0.7203	Medium							9.87	9.9	8.097	73.605	0.6879	Medium	9.87
+ IPI 549	574	578	LLWHF	13.11	2	3	13.1	13.17	0.365	12.164	0.9059	High	13.1	13.18	0.313	10.419	0.8919	High	13.1	13.17	0.349	11.644	0.9425	High	13.1	13.18	0.765	25.501	0.9085	High	13.1	13.18	0.73	24.327	0.932	High							13.1	13.18	1.528	50.942	0.9507	High	13.1
+ IPI 549	579	592	RYESLKHPKAYPKL	6.32	4	10	6.37	6.47	1.822	18.22	0.9048	High	6.37	6.47	1.922	19.22	0.8702	Medium	6.37	6.47	1.827	18.267	0.7847	Medium	6.37	6.47	3.396	33.957	0.918	High	6.37	6.47	3.211	32.109	0.9223	Medium							6.37	6.47	5.337	53.366	0.8701	Medium	6.37
+ IPI 549	602	607	EIVAKT	4.54	1	4	4.66	4.77	0.888	22.212	0.9134	Medium	4.77	4.85	0.974	24.354	0.8733	Medium	4.53	4.62	0.829	20.736	0.9077	Medium	4.6	4.69	1.629	40.734	0.9028	Medium	4.66	4.74	1.627	40.676	0.9293	Medium							4.6	4.69	3.234	80.853	0.9367	Medium	4.68
+ IPI 549	611	622	LARREVWDQSAL	9.4	2	10	9.49	9.57	6.276	62.764	0.7987	Medium	9.38	9.46	6.062	60.623	0.8606	Medium	9.33	9.42	6.196	61.959	0.9077	Medium	9.33	9.43	6.735	67.353	0.9201	Medium	9.33	9.42	6.756	67.561	0.8838	Medium							9.33	9.43	6.9	69	0.9065	High	9.33
+ IPI 549	612	622	ARREVWDQSAL	9.08	3	9	9.26	9.33	5.926	65.844	0.9103	Medium	9.13	9.22	5.75	63.89	0.8867	Medium	9.13	9.22	5.81	64.55	0.9159	High	9.13	9.22	5.986	66.511	0.9454	High	9.13	9.22	6.172	68.58	0.8969	High							9.13	9.22	6.183	68.698	0.9415	High	9.13
+ IPI 549	623	630	DVGLTMQL	11.91	2	6	12.11	12.18	0.88	14.66	0.8068	Medium	12.04	12.11	1.439	23.988	0.881	Medium	12.11	12.18	0.613	10.214	0.8748	Medium	12.11	12.19	2.005	33.424	0.7926	Medium	12.11	12.19	1.751	29.179	0.8644	Medium							12.11	12.19	3.625	60.411	0.8345	Medium	12.11
+ IPI 549	631	635	LDCNF	10.64	1	3	10.58	10.71	0.502	16.745	0.8202	Medium	10.72	10.79	0.571	19.018	0.8867	Medium	10.76	10.84	0.456	15.184	0.9161	Medium	10.68	10.77	0.993	33.106	0.9352	Medium	10.68	10.77	1.012	33.742	0.9349	Medium							10.69	10.77	1.896	63.205	0.9341	Medium	10.68
+ IPI 549	636	642	SDENVRA	4.34	1	5	4.36	4.39	0.956	19.125	0.8064	Medium	4.36	4.4	0.924	18.474	0.7908	Medium	4.31	4.39	0.865	17.298	0.8478	Medium	4.36	4.4	1.184	23.67	0.8612	Medium	4.36	4.39	1.136	22.711	0.8582	Medium							4.36	4.39	2.335	46.7	0.873	Medium	4.39
+ IPI 549	643	650	IAVQKLES	6.86	1	6	6.85	6.86	0.793	13.22	0.8282	Medium	6.85	6.87	0.747	12.451	0.6987	Medium	6.85	6.87	0.78	12.994	0.8013	Medium	6.85	6.87	1.026	17.098	0.7997	Medium	6.85	6.86	1.049	17.491	0.7728	Medium							6.85	6.86	1.779	29.643	0.7662	Medium	6.85
+ IPI 549	643	651	IAVQKLESL	9.62	1	7	9.43	9.8	0.933	13.323	0.874	Medium	9.43	9.8	0.817	11.678	0.7378	Medium	9.43	9.8	0.837	11.952	0.8958	Medium	9.43	9.8	1.011	14.446	0.9014	Medium	9.43	9.8	1.043	14.901	0.8679	Medium							9.43	9.8	1.962	28.028	0.8788	Medium	9.43
+ IPI 549	643	654	IAVQKLESLEDD	9.34	2	10	9.26	9.35	1.792	17.923	0.8614	Medium	9.27	9.35	1.686	16.862	0.8532	Medium	9.26	9.34	1.678	16.776	0.9142	Medium	9.27	9.35	2.379	23.793	0.9053	Medium	9.27	9.35	2.39	23.897	0.8874	Medium							9.27	9.35	3.36	33.597	0.8879	Medium	9.27
+ IPI 549	643	657	IAVQKLESLEDDDVL	11.41	2	13	11.21	11.5	1.818	13.981	0.8064	Medium	11.21	11.5	1.8	13.848	0.7745	Medium	11.21	11.5	1.637	12.596	0.8227	Medium	11.21	11.5	2.387	18.363	0.8367	Medium	11.21	11.5	2.459	18.916	0.7758	Medium							11.21	11.5	3.333	25.635	0.7957	Medium	11.21
+ IPI 549	652	657	EDDDVL	9.03	1	4	9.09	9.17	0.147	3.682	0.7913	Medium	9.16	9.23	0.213	5.33	0.6173	Medium	9.08	9.17	0.124	3.091	0.8325	Medium	9.09	9.17	0.225	5.614	0.8858	Medium	9.19	9.27	0.216	5.403	0.8809	Medium							9.09	9.17	0.631	15.77	0.8583	Medium	9.09
+ IPI 549	654	662	DDVLHYLLQ	12.91	2	7	12.91	13.02	0.131	1.872	0.7027	Medium	12.91	13.02	0.169	2.417	0.6097	Medium	12.91	13.01	0.053	0.752	0.7841	Medium	12.91	13.02	0.212	3.032	0.7353	Medium	12.91	13.02	0.336	4.794	0.743	Medium							12.91	13.02	1.259	17.988	0.7369	Medium	12.91
+ IPI 549	655	662	DVLHYLLQ	12.82	2	6	12.59	12.95	0.099	1.657	0.7726	Medium	12.59	12.95	0.117	1.957	0.6711	Medium	12.59	12.95	0.072	1.206	0.8047	Medium	12.59	12.95	0.252	4.206	0.7619	Medium	12.59	12.95	0.29	4.835	0.7813	Medium							12.59	12.95	1.343	22.384	0.8167	Medium	12.59
+ IPI 549	655	663	DVLHYLLQL	14.29	2	7	14.17	14.53	0.136	1.936	0.8331	Medium	14.18	14.53	0.108	1.54	0.7576	Medium	14.17	14.53	0.054	0.778	0.8533	Medium	14.17	14.53	0.309	4.415	0.8884	Medium	14.17	14.53	0.289	4.123	0.8469	Medium							14.18	14.53	1.437	20.534	0.9034	Medium	14.17
+ IPI 549	658	665	HYLLQLVQ	11.67	2	6	11.66	11.68	0.142	2.363	0.6168	Medium	11.66	11.68	0.183	3.042	0.6206	Medium	11.65	11.68	0.104	1.729	0.8016	Medium	11.66	11.68	0.412	6.872	0.6851	Medium	11.66	11.68	0.168	2.807	0.8047	Medium							11.62	11.68	0.723	12.055	0.6772	Medium	11.66
+ IPI 549	663	677	LVQAVKFEPYHDSAL	9.66	3	12	9.66	9.75	0.428	3.568	0.9314	High	9.66	9.75	0.486	4.048	0.9079	Medium	9.66	9.75	0.38	3.169	0.9446	High	9.66	9.75	0.799	6.657	0.9213	High	9.66	9.75	0.818	6.814	0.9237	Medium							9.66	9.75	1.005	8.372	0.9273	High	9.66
+ IPI 549	664	677	VQAVKFEPYHDSAL	9.26	2	11	9.11	9.52	0.411	3.736	0.9187	Medium	9.12	9.53	0.46	4.182	0.895	Medium	9.11	9.52	0.394	3.579	0.9386	Medium	9.12	9.53	0.806	7.325	0.9295	Medium	9.11	9.53	0.781	7.096	0.9361	Medium							9.11	9.53	1.031	9.377	0.9196	Medium	9.11
+ IPI 549	666	677	AVKFEPYHDSAL	8.87	2	9	8.86	8.95	0.406	4.506	0.8609	Medium	8.91	8.99	0.503	5.585	0.6337	Medium	8.86	8.95	0.414	4.6	0.849	Medium	8.86	8.96	0.865	9.611	0.8753	Medium	8.86	8.95	0.83	9.221	0.7928	Medium							8.86	8.96	1.021	11.348	0.8995	Medium	8.86
+ IPI 549	681	697	LLKRGLRNKRIGHFLFW	10.27	5	15	10.49	10.58	0.082	0.549	0.943	High	10.49	10.58	0.048	0.321	0.9084	Medium	10.49	10.58	0.063	0.421	0.935	Medium	10.49	10.58	0.08	0.534	0.9579	High	10.49	10.58	0.044	0.294	0.9362	High							10.49	10.58	0.238	1.59	0.9374	High	10.49
+ IPI 549	698	713	FLRSEIAQSRHYQQRF	7.69	4	14	7.52	7.93	0.717	5.119	0.8766	Medium	7.52	7.93	0.573	4.093	0.8639	Medium	7.51	7.93	0.6	4.283	0.8819	Medium	7.52	7.93	1.017	7.264	0.9004	Medium	7.52	7.93	0.957	6.837	0.8708	Medium							7.52	7.93	2.534	18.097	0.9025	Medium	7.52
+ IPI 549	700	713	RSEIAQSRHYQQRF	5.79	4	12	5.77	6.29	0.575	4.794	0.9332	High	5.77	6.29	0.417	3.476	0.9075	High	5.77	6.3	0.405	3.375	0.9207	High	5.77	6.29	0.871	7.259	0.9329	High	5.77	6.29	0.739	6.157	0.9314	High							5.77	6.29	2.179	18.155	0.9272	High	5.77
+ IPI 549	714	719	AVILEA	9.26	1	4	9.19	9.33	0.039	0.97	0.8446	Medium	9.19	9.33	0.054	1.339	0.853	Medium	9.19	9.33	0.025	0.616	0.8591	Medium	9.19	9.33	0.025	0.631	0.8545	Medium	9.19	9.33	0.032	0.81	0.8851	Medium							9.19	9.33	0.028	0.691	0.8301	Medium	9.19
+ IPI 549	720	729	YLRGCGTAML	9.99	2	8	10.04	10.1	0.23	2.87	0.9099	Medium	10.04	10.1	0.171	2.135	0.8591	Medium	10.03	10.09	0.168	2.1	0.9225	Medium	10.04	10.1	0.687	8.583	0.9111	Medium	10.04	10.1	0.657	8.207	0.8972	Medium							10.04	10.1	1.453	18.166	0.8833	Medium	10.04
+ IPI 549	729	737	LHDFTQQVQ	7.59	2	7	7.46	7.65	0.101	1.438	0.8196	Medium	7.46	7.65	0.133	1.894	0.6815	Medium	7.46	7.65	0.1	1.431	0.8595	Medium	7.46	7.66	0.088	1.256	0.8734	Medium	7.46	7.65	0.066	0.941	0.8612	Medium							7.46	7.65	0.13	1.853	0.8282	Medium	7.46
+ IPI 549	732	737	FTQQVQ	5.63	1	4	5.57	5.69	0.047	1.168	0.8276	Medium	5.57	5.69	0.106	2.659	0.7306	Medium	5.57	5.69	0.045	1.124	0.8411	Medium	5.57	5.69	0.062	1.557	0.9005	Medium	5.57	5.69	0.078	1.962	0.845	Medium							5.57	5.69	0.085	2.118	0.8761	Medium	5.57
+ IPI 549	732	738	FTQQVQV	8.12	1	5	8.17	8.26	0.047	0.937	0.7856	Medium	8.18	8.26	0.065	1.309	0.8362	Medium	8.17	8.25	0.077	1.54	0.8826	Medium	8.18	8.26	0.052	1.035	0.8543	Medium	8.26	8.33	0.051	1.022	0.8833	Medium							8.17	8.26	0.153	3.067	0.8278	Medium	8.17
+ IPI 549	742	747	LQKVTL	8.23	1	4	8.2	8.33	0.354	8.861	0.934	Medium	8.2	8.33	0.222	5.554	0.9337	Medium	8.19	8.33	0.291	7.267	0.9523	Medium	8.2	8.33	1.215	30.378	0.9516	Medium	8.2	8.33	1.234	30.858	0.9485	Medium							8.2	8.33	2.161	54.027	0.9341	Medium	8.2
+ IPI 549	748	761	DIKSLSAEKYDVSS	8	2	12	7.87	8.2	9.935	82.793	0.8683	Medium	7.87	8.2	8.772	73.102	0.8703	Medium	7.87	8.19	9.422	78.517	0.9079	High	7.87	8.2	9.549	79.575	0.9132	High	7.87	8.2	9.871	82.262	0.9017	High							7.87	8.2	9.703	80.861	0.9	High	7.87
+ IPI 549	748	767	DIKSLSAEKYDVSSQVISQL	11.14	3	18	10.94	11.35	14.203	78.908	0.8445	Medium	10.94	11.35	13.926	77.367	0.8201	Medium	10.94	11.34	13.614	75.633	0.8927	Medium	10.94	11.35	14.164	78.69	0.8808	Medium	10.94	11.35	14.375	79.862	0.8928	Medium							10.95	11.35	14.276	79.309	0.8928	Medium	10.94
+ IPI 549	748	782	DIKSLSAEKYDVSSQVISQLKQKLENLQNSQLPES	12.49	5	32	12.38	12.45	19.188	59.961	0.8806	High	12.24	12.76	18.629	58.217	0.8116	Medium	12.23	12.75	18.13	56.655	0.8915	High	12.24	12.76	23.563	73.635	0.9026	High	12.24	12.76	24.1	75.311	0.8788	High							12.24	12.76	25.576	79.925	0.8943	High	12.24
+ IPI 549	755	782	EKYDVSSQVISQLKQKLENLQNSQLPES	12.1	3	25	12.23	12.3	13.529	54.117	0.7375	Medium	12.03	12.1	13.463	53.853	0.7346	Medium	12.04	12.13	13.096	52.385	0.7964	Medium	12.12	12.21	18.33	73.32	0.8489	Medium	12.12	12.21	18.555	74.22	0.8593	Medium							12.12	12.21	20.191	80.765	0.8574	Medium	12.12
+ IPI 549	762	782	QVISQLKQKLENLQNSQLPES	10.6	2	18	10.41	10.73	9.38	52.11	0.8547	Medium	10.42	10.73	8.878	49.322	0.8608	Medium	10.41	10.73	8.608	47.822	0.8973	Medium	10.42	10.74	13.844	76.912	0.8784	Medium	10.42	10.73	14.256	79.197	0.8718	Medium							10.42	10.74	15.887	88.263	0.8491	Medium	10.42
+ IPI 549	767	782	LKQKLENLQNSQLPES	7.51	2	13	7.36	7.61	5.227	40.205	0.8621	Medium	7.36	7.61	4.982	38.319	0.859	Medium	7.35	7.61	4.851	37.315	0.9139	Medium	7.36	7.61	8.203	63.1	0.9019	Medium	7.36	7.61	8.407	64.669	0.8829	Medium							7.36	7.61	10.288	79.14	0.8776	Medium	7.36
+ IPI 549	768	782	KQKLENLQNSQLPES	7.13	2	12	6.96	7.45	4.968	41.404	0.9485	High	6.97	7.45	4.782	39.852	0.952	High	6.97	7.45	4.641	38.674	0.9496	High	6.97	7.45	7.614	63.45	0.9418	High	6.96	7.45	7.832	65.27	0.9453	High							6.97	7.45	9.491	79.093	0.9425	High	6.96
+ IPI 549	783	796	FRVPYDPGLKAGAL	10.16	3	10	10.22	10.31	0.236	2.36	0.901	High	10.22	10.31	0.3	3.004	0.904	High	10.22	10.3	0.265	2.649	0.9087	High	10.22	10.31	0.446	4.459	0.9074	High	10.22	10.31	0.461	4.612	0.9032	High							10.22	10.31	1.756	17.564	0.9144	High	10.22
+ IPI 549	797	812	AIEKCKVMASKKKPLW	6.81	4	13	6.98	7.07	2.696	20.736	0.9101	Medium	6.98	7.07	2.101	16.158	0.9501	Medium	6.98	7.06	2.135	16.425	0.9355	Medium	6.98	7.07	3.243	24.946	0.8885	Medium	6.98	7.07	2.851	21.931	0.9576	Medium							6.98	7.07	4.157	31.977	0.8881	Medium	6.98
+ IPI 549	797	815	AIEKCKVMASKKKPLWLEF	10.45	2	16	10.29	10.72	2.421	15.131	0.8677	Medium	10.29	10.72	1.571	9.816	0.8716	Medium	10.29	10.71	1.502	9.387	0.9105	Medium	10.29	10.72	2.844	17.778	0.8924	Medium	10.31	10.72	1.998	12.485	0.9099	Medium							10.29	10.72	3.745	23.406	0.8909	Medium	10.29
+ IPI 549	802	815	KVMASKKKPLWLEF	10.71	4	11	10.86	10.94	1.298	11.8	0.8614	Medium	10.86	10.94	1.267	11.518	0.8582	Medium	10.86	10.94	1.131	10.285	0.9134	Medium	10.73	10.8	1.679	15.265	0.8284	Medium	10.78	10.86	1.505	13.683	0.7972	Medium							10.79	10.86	1.862	16.928	0.8783	Medium	10.79
+ IPI 549	816	823	KCADPTAL	7.06	1	5	6.88	7.17	1.313	26.252	0.8805	Medium	6.88	7.18	1.743	34.857	0.8694	Medium	6.88	7.17	1.112	22.246	0.9032	Medium	6.88	7.18	2.727	54.539	0.9049	Medium	6.88	7.17	2.782	55.633	0.9033	Medium							6.88	7.18	3.748	74.954	0.8746	Medium	6.88
+ IPI 549	816	825	KCADPTALSN	5.74	2	7	5.69	5.78	2.88	41.141	0.9194	Medium	5.85	5.92	2.849	40.7	0.8145	Medium	5.61	5.67	2.779	39.7	0.8523	Medium	5.69	5.78	4.288	61.259	0.9412	Medium	5.74	5.81	4.349	62.126	0.924	Medium							5.69	5.78	5.281	75.444	0.9286	Medium	5.69
+ IPI 549	816	829	KCADPTALSNETIG	8.17	2	11	8.01	8.43	4.302	39.111	0.8326	Medium	8.02	8.43	4.542	41.293	0.8132	Medium	8.01	8.42	3.936	35.786	0.8938	Medium	8.02	8.43	6.109	55.539	0.884	Medium	8.01	8.43	6.08	55.269	0.8826	Medium							8.02	8.43	7.552	68.659	0.8587	Medium	8.01
+ IPI 549	816	842	KCADPTALSNETIGIIFKHGDDLRQDM	11.89	5	24	12.01	12.08	4.039	16.828	0.8914	High	12.01	12.08	4.277	17.82	0.8692	Medium	12.01	12.07	3.825	15.936	0.9139	High	12.01	12.08	6.38	26.584	0.9048	High	12.01	12.08	6.737	28.073	0.8853	High							12.01	12.08	8.732	36.383	0.8499	Medium	12.01
+ IPI 549	824	829	SNETIG	5.53	1	4	5.54	5.62	1.624	40.605	0.7614	Medium	5.54	5.62	1.588	39.691	0.7011	Medium	5.5	5.56	1.569	39.218	0.7466	Medium	5.54	5.62	2.05	51.247	0.8402	Medium	5.54	5.62	2.007	50.179	0.7861	Medium							5.54	5.62	2.32	57.998	0.8667	Medium	5.54
+ IPI 549	824	842	SNETIGIIFKHGDDLRQDM	10.75	4	17	10.88	10.97	1.16	6.825	0.7778	Medium	10.86	10.94	1.123	6.605	0.8427	Medium	10.86	10.94	0.996	5.86	0.8928	Medium	10.86	10.94	2.389	14.051	0.8515	Medium	10.86	10.94	2.228	13.106	0.9183	Medium							10.86	10.95	3.851	22.655	0.8274	Medium	10.86
+ IPI 549	844	848	ILQIL	12.17	1	3	12.2	12.29	0.001	0.019	0.9106	Medium	12.3	12.31	0.024	0.81	0.9006	Medium	12.2	12.28	0.043	1.419	0.9113	Medium	12.2	12.29	0.003	0.097	0.9475	Medium	12.2	12.29	0.036	1.211	0.903	Medium							12.2	12.29	0.031	1.044	0.9369	Medium	12.2
+ IPI 549	849	855	RIMESIW	11.65	2	5	11.6	11.68	0.134	2.686	0.8028	Medium	11.6	11.68	0.145	2.907	0.6454	Medium	11.6	11.68	0.041	0.81	0.8007	Medium	11.6	11.68	0.069	1.378	0.8555	Medium	11.6	11.68	0.112	2.242	0.6847	Medium							11.6	11.68	0.065	1.299	0.8385	Medium	11.6
+ IPI 549	849	862	RIMESIWETESLDL	13.25	2	12	13.17	13.39	0.641	5.342	0.8237	Medium	13.18	13.39	0.545	4.545	0.8448	Medium	13.17	13.39	0.5	4.165	0.8922	Medium	13.18	13.4	1.04	8.667	0.8721	Medium	13.18	13.39	1.005	8.372	0.8921	Medium							13.18	13.4	2.303	19.189	0.8274	Medium	13.18
+ IPI 549	853	862	SIWETESLDL	13.27	2	8	13.36	13.42	0.495	6.193	0.8349	Medium	13.36	13.42	0.419	5.243	0.8048	Medium	13.36	13.42	0.391	4.893	0.8962	Medium	13.36	13.42	0.881	11.017	0.8792	Medium	13.36	13.42	0.824	10.299	0.8822	Medium							13.36	13.42	1.866	23.32	0.8443	Medium	13.36
+ IPI 549	862	878	LCLLPYGCISTGDKIGM	13.06	3	14	12.96	13.06	0.339	2.421	0.7454	Medium	12.97	13.06	0.377	2.69	0.7328	Medium	13.03	13.1	0.321	2.291	0.7751	Medium	12.97	13.06	0.595	4.247	0.8295	Medium	13.05	13.12	0.912	6.514	0.71	Medium							12.97	13.06	1.574	11.245	0.7922	Medium	12.97
+ IPI 549	863	869	CLLPYGC	11.86	1	4	11.77	11.87	0.149	3.729	0.7953	Medium	11.78	11.87	0.207	5.167	0.6506	Medium	11.77	11.86	0.151	3.771	0.7955	Medium	11.78	11.87	0.439	10.968	0.8019	Medium	11.77	11.87	0.435	10.865	0.7216	Medium							11.78	11.87	0.957	23.934	0.7688	Medium	11.77
+ IPI 549	863	878	CLLPYGCISTGDKIGM	12.04	2	13	11.9	12.48	0.459	3.532	0.8955	Medium	11.9	12.48	0.464	3.57	0.8919	Medium	11.9	12.48	0.36	2.767	0.9107	Medium	11.9	12.48	0.909	6.991	0.9021	Medium	11.9	12.48	0.801	6.158	0.9148	Medium							11.9	12.48	1.771	13.624	0.9029	Medium	11.9
+ IPI 549	863	880	CLLPYGCISTGDKIGMIE	12.38	2	15	12.39	12.49	0.446	2.974	0.86	Medium	12.4	12.49	0.432	2.88	0.8887	Medium	12.39	12.49	0.316	2.109	0.909	Medium	12.4	12.49	0.753	5.017	0.8753	Medium	12.4	12.49	0.661	4.405	0.9104	Medium							12.4	12.49	1.671	11.138	0.8623	Medium	12.4
+ IPI 549	865	878	LPYGCISTGDKIGM	10.57	2	12	10.35	10.72	0.492	4.1	0.6604	Medium	10.35	10.73	0.474	3.951	0.6728	Medium	10.34	10.72	0.378	3.149	0.7226	Medium	10.35	10.73	0.778	6.487	0.685	Medium	10.35	10.73	0.758	6.313	0.7434	Medium							10.35	10.73	1.862	15.516	0.6741	Medium	10.35
+ IPI 549	879	887	IEIVKDATT	7.08	1	7	7.02	7.39	0.477	6.816	0.9138	Medium	7.02	7.39	0.426	6.083	0.923	High	7.02	7.39	0.326	4.658	0.9321	High	7.03	7.39	1.051	15.015	0.904	High	7.02	7.39	1.067	15.238	0.9167	High							7.02	7.39	1.868	26.681	0.9091	Medium	7.02
+ IPI 549	879	889	IEIVKDATTIA	9.23	1	9	9.03	9.3	0.508	5.642	0.8928	Medium	9.03	9.3	0.375	4.169	0.9023	Medium	9.03	9.29	0.323	3.591	0.9038	Medium	9.03	9.3	1.135	12.607	0.9182	Medium	9.03	9.3	1.196	13.292	0.8825	Medium							9.03	9.3	2.04	22.664	0.9123	Medium	9.03
+ IPI 549	881	901	IVKDATTIAKIQQSTVGNTGA	8.37	3	19	8.26	8.55	6.868	36.145	0.8276	Medium	8.26	8.55	6.595	34.709	0.8306	Medium	8.25	8.55	6.541	34.425	0.8891	Medium	8.26	8.55	7.127	37.508	0.8911	Medium	8.26	8.55	7.215	37.976	0.8932	Medium							8.26	8.55	8.661	45.583	0.8529	Medium	8.26
+ IPI 549	888	902	IAKIQQSTVGNTGAF	8.64	2	13	8.68	8.77	6.638	51.062	0.8228	Medium	8.54	8.61	6.889	52.99	0.7134	Medium	8.53	8.61	6.683	51.41	0.8496	Medium	8.54	8.62	7.617	58.59	0.8829	Medium	8.53	8.62	7.412	57.013	0.7652	Medium							8.67	8.75	8.036	61.814	0.8448	Medium	8.69
+ IPI 549	888	907	IAKIQQSTVGNTGAFKDEVL	9.51	3	18	9.65	9.72	7.517	41.759	0.8162	Medium	9.55	9.62	7.148	39.714	0.8053	Medium	9.55	9.61	6.965	38.693	0.8887	Medium	9.55	9.62	8.529	47.384	0.8645	Medium	9.55	9.62	8.299	46.103	0.8761	Medium							9.55	9.62	9.586	53.258	0.8316	Medium	9.55
+ IPI 549	902	910	FKDEVLNHW	10.1	3	7	9.96	10.28	0.165	2.358	0.8635	Medium	9.96	10.28	0.169	2.409	0.7842	Medium	9.96	10.28	0.193	2.761	0.8963	Medium	9.96	10.28	0.288	4.11	0.8771	Medium	9.96	10.28	0.313	4.474	0.9098	Medium							9.96	10.28	0.876	12.52	0.882	Medium	9.96
+ IPI 549	902	924	FKDEVLNHWLKEKSPTEEKFQAA	9.54	4	20	9.4	9.78	1.748	8.738	0.8384	Medium	9.4	9.79	1.411	7.056	0.7589	Medium	9.4	9.78	1.45	7.248	0.8794	Medium	9.4	9.79	2.655	13.273	0.8606	Medium	9.4	9.79	2.361	11.806	0.8858	Medium							9.4	9.79	4.1	20.501	0.8242	Medium	9.4
+ IPI 549	908	924	NHWLKEKSPTEEKFQAA	7.08	3	14	7.02	7.23	1.773	12.665	0.7626	Medium	7.02	7.23	1.401	10.008	0.6214	Medium	7.01	7.24	1.557	11.124	0.847	Medium	7.02	7.24	2.576	18.398	0.848	Medium	7.02	7.23	2.571	18.363	0.8406	Medium							7.02	7.23	3.45	24.642	0.8263	Medium	7.02
+ IPI 549	925	934	VERFVYSCAG	9.08	1	8	9.1	9.17	0.138	1.729	0.8797	High	9.11	9.17	0.125	1.561	0.8452	Medium	9.1	9.17	0.149	1.866	0.897	High	9.11	9.17	0.115	1.432	0.9108	High	9.11	9.17	0.057	0.707	0.8649	High							9.11	9.17	0.139	1.737	0.8665	Medium	9.11
+ IPI 549	927	934	RFVYSCAG	8.29	1	6	8.29	8.36	0.087	1.447	0.8319	Medium	8.29	8.36	0.133	2.22	0.855	High	8.29	8.35	0.051	0.847	0.9091	High	8.29	8.36	0.251	4.18	0.8729	High	8.29	8.36	0.116	1.942	0.8429	Medium							8.29	8.36	0.125	2.08	0.842	Medium	8.29
+ IPI 549	935	939	YCVAT	6.8	1	3	6.82	6.91	0.022	0.745	0.9177	Medium	6.82	6.92	0.04	1.337	0.8486	Medium	6.83	6.92	0.014	0.477	0.9206	Medium	6.82	6.92	0.026	0.877	0.9212	High	6.82	6.91	0.022	0.727	0.8763	Medium							6.82	6.91	0.026	0.857	0.9265	High	6.82
+ IPI 549	940	953	FVLGIGDRHNDNIM	10.54	3	12	10.61	10.7	0.214	1.784	0.9174	High	10.61	10.7	0.16	1.331	0.9171	High	10.61	10.7	0.152	1.27	0.9139	High	10.61	10.7	0.292	2.432	0.9223	High	10.61	10.7	0.281	2.341	0.9173	High							10.61	10.7	0.829	6.905	0.9301	High	10.61
+ IPI 549	954	960	ITETGNL	7.56	1	5	7.7	7.8	0.223	4.469	0.8599	Medium	7.7	7.8	0.263	5.26	0.8629	Medium	7.7	7.79	0.192	3.832	0.9176	Medium	7.71	7.8	0.671	13.412	0.8894	Medium	7.7	7.8	0.675	13.498	0.913	Medium							7.7	7.8	1.08	21.607	0.894	Medium	7.7
+ IPI 549	954	961	ITETGNLF	11.33	1	6	11.19	11.28	0.207	3.451	0.856	Medium	11.19	11.28	0.296	4.934	0.6899	Medium	11.18	11.28	0.279	4.651	0.8499	Medium	11.28	11.36	0.677	11.281	0.8943	Medium	11.38	11.46	0.635	10.581	0.8807	Medium							11.26	11.35	1.074	17.899	0.8977	Medium	11.29
+ IPI 549	954	975	ITETGNLFHIDFGHILGNYKSF	13.27	3	20	13.23	13.31	5.692	28.462	0.8378	Medium	13.23	13.31	5.31	26.549	0.7635	Medium	13.22	13.31	5.783	28.916	0.8412	Medium	13.23	13.31	6.395	31.976	0.8371	Medium	13.23	13.31	6.561	32.805	0.7914	Medium							13.23	13.31	6.843	34.214	0.8379	Medium	13.23
+ IPI 549	954	976	ITETGNLFHIDFGHILGNYKSFL	13.82	4	21	13.73	14.05	6.924	32.97	0.7541	Medium	13.73	14.05	6.295	29.978	0.6797	Medium	13.73	14.05	6.839	32.566	0.7547	Medium	13.73	14.05	7.495	35.689	0.8465	Medium	13.73	14.05	7.659	36.471	0.7269	Medium							13.73	14.05	7.978	37.989	0.8396	Medium	13.73
+ IPI 549	954	992	ITETGNLFHIDFGHILGNYKSFLGINKERVPFVLTPDFL	13.93	5	35	13.94	14.04	9.893	28.265	0.8782	High	13.94	14.04	9.066	25.902	0.8353	Medium	13.94	14.04	9.231	26.375	0.8384	Medium	13.94	14.04	10.746	30.704	0.8912	High	13.94	14.04	10.768	30.766	0.8327	Medium							13.94	14.04	11.64	33.256	0.8728	High	13.94
+ IPI 549	961	972	FHIDFGHILGNY	12.72	3	10	12.54	12.97	3.789	37.894	0.8709	Medium	12.54	12.98	2.983	29.828	0.8354	Medium	12.54	12.97	3.568	35.677	0.9125	Medium	12.54	12.98	4.234	42.337	0.8999	Medium	12.54	12.97	4.142	41.418	0.9152	Medium							12.54	12.98	4.512	45.124	0.8837	Medium	12.54
+ IPI 549	961	975	FHIDFGHILGNYKSF	12.39	4	13	12.44	12.55	5.896	45.353	0.7902	Medium	12.4	12.48	5.508	42.37	0.8218	Medium	12.33	12.5	5.678	43.675	0.8857	Medium	12.33	12.51	6.268	48.215	0.8396	Medium	12.33	12.5	6.34	48.768	0.8782	Medium							12.33	12.51	6.618	50.904	0.8334	Medium	12.33
+ IPI 549	961	976	FHIDFGHILGNYKSFL	13.36	4	14	13.2	13.62	6.983	49.876	0.7373	Medium	13.2	13.62	6.22	44.432	0.7079	Medium	13.2	13.62	6.685	47.752	0.839	Medium	13.2	13.62	7.35	52.5	0.7971	Medium	13.2	13.62	7.325	52.318	0.834	Medium							13.2	13.62	6.9	49.289	0.7796	Medium	13.2
+ IPI 549	961	992	FHIDFGHILGNYKSFLGINKERVPFVLTPDFL	13.78	5	28	13.8	13.91	9.91	35.393	0.8582	Medium	13.68	13.75	9.06	32.356	0.5661	Medium	13.72	13.8	9.394	33.55	0.7239	Medium	13.72	13.8	10.848	38.742	0.8579	Medium	13.72	13.8	10.649	38.033	0.7033	Medium							13.72	13.8	11.741	41.934	0.819	Medium	13.72
+ IPI 549	962	975	HIDFGHILGNYKSF	11.38	3	12	11.35	11.45	6.239	51.993	0.7648	Medium	11.31	11.39	5.992	49.937	0.7346	Medium	11.3	11.39	6.033	50.275	0.8424	Medium	11.31	11.39	6.669	55.576	0.8417	Medium	11.3	11.39	6.779	56.495	0.8337	Medium							11.31	11.39	6.932	57.764	0.8197	Medium	11.31
+ IPI 549	973	992	KSFLGINKERVPFVLTPDFL	12.87	4	16	12.79	12.86	4.404	27.527	0.8949	High	12.79	12.87	3.904	24.4	0.8837	Medium	12.79	12.86	3.634	22.713	0.9228	High	12.79	12.87	4.823	30.146	0.917	High	12.79	12.87	4.216	26.35	0.9093	High							12.79	12.87	5.414	33.835	0.897	High	12.79
+ IPI 549	976	992	LGINKERVPFVLTPDFL	13.06	3	13	13.08	13.16	2.705	20.805	0.9365	High	13.15	13.24	2.605	20.039	0.9372	High	13.07	13.17	2.328	17.909	0.9388	High	12.93	13.48	3.067	23.59	0.9252	High	12.93	13.48	2.847	21.904	0.9328	High							12.93	13.48	3.597	27.667	0.9396	High	12.93
+ IPI 549	977	992	GINKERVPFVLTPDFL	12.98	3	12	12.75	13.2	1.953	16.279	0.9101	Medium	12.75	13.2	1.967	16.394	0.8763	Medium	12.75	13.2	1.665	13.878	0.9182	Medium	12.75	13.2	2.329	19.412	0.9308	Medium	12.75	13.2	2.197	18.306	0.9111	Medium							12.75	13.2	2.823	23.524	0.9268	Medium	12.75
+ IPI 549	993	1014	FVMGTSGKKTSPHFQKFQDICV	9.54	2	19	9.4	9.75	1.888	9.938	0.8577	Medium	9.4	9.75	1.226	6.452	0.7974	Medium	9.4	9.75	1.018	5.359	0.9007	Medium	9.4	9.75	2.192	11.538	0.8883	Medium	9.4	9.75	1.296	6.821	0.8917	Medium							9.4	9.75	3.142	16.537	0.8742	Medium	9.4
+ IPI 549	1015	1026	KAYLALRHHTNL	6.32	2	10	6.3	6.54	0.367	3.67	0.8502	Medium	6.3	6.55	0.179	1.789	0.8449	Medium	6.3	6.55	0.171	1.713	0.9077	Medium	6.3	6.55	0.39	3.9	0.8595	Medium	6.3	6.55	0.307	3.072	0.9018	Medium							6.3	6.55	0.746	7.461	0.8711	Medium	6.3
+ IPI 549	1015	1027	KAYLALRHHTNLL	7.62	4	11	7.75	7.81	0.253	2.296	0.8206	Medium	7.75	7.81	0.078	0.705	0.8091	Medium	7.74	7.81	0.165	1.504	0.8831	Medium	7.75	7.81	0.264	2.403	0.8427	Medium	7.75	7.81	0.164	1.491	0.8914	Medium							7.75	7.81	0.652	5.93	0.8733	Medium	7.75
+ IPI 549	1017	1026	YLALRHHTNL	6.64	3	8	6.79	6.86	0.261	3.268	0.9142	Medium	6.79	6.86	0.259	3.235	0.8966	Medium	6.79	6.86	0.207	2.587	0.9137	Medium	6.79	6.86	0.305	3.806	0.908	Medium	6.79	6.86	0.317	3.962	0.9316	Medium							6.79	6.86	0.786	9.831	0.8969	Medium	6.79
+ IPI 549	1017	1027	YLALRHHTNLL	8.29	2	9	8.2	8.37	0.211	2.346	0.8089	Medium	8.2	8.37	0.187	2.081	0.6301	Medium	8.19	8.36	0.161	1.784	0.7908	Medium	8.2	8.37	0.255	2.834	0.809	Medium	8.2	8.37	0.221	2.453	0.7199	Medium							8.2	8.37	0.587	6.518	0.7934	Medium	8.2
+ IPI 549	1019	1026	ALRHHTNL	4.09	2	6	4.19	4.26	0.332	5.529	0.9013	Medium	4.19	4.26	0.313	5.221	0.7927	Medium	4.2	4.26	0.227	3.786	0.9006	Medium	4.19	4.26	0.352	5.864	0.9389	Medium	4.19	4.26	0.38	6.333	0.9069	Medium							4.19	4.26	0.697	11.625	0.9242	Medium	4.19
+ IPI 549	1019	1027	ALRHHTNLL	6.22	2	7	6.26	6.44	0.213	3.047	0.8767	Medium	6.26	6.44	0.205	2.925	0.7466	Medium	6.26	6.44	0.154	2.206	0.8734	Medium	6.26	6.44	0.293	4.182	0.8774	Medium	6.26	6.44	0.218	3.112	0.9068	Medium							6.26	6.44	0.645	9.214	0.8883	Medium	6.26
+ IPI 549	1031	1035	FSMML	13.4	1	3	13.28	13.5	0.022	0.738	0.8997	Medium	13.29	13.5	0.027	0.901	0.8399	Medium	13.28	13.5	0.029	0.964	0.9008	Medium	13.29	13.5	0.029	0.965	0.91	Medium	13.29	13.5	0.009	0.285	0.8873	Medium							13.29	13.5	0.064	2.129	0.906	Medium	13.29
+ IPI 549	1035	1042	LMTGMPQL	11.7	2	5	11.69	11.76	1.684	33.67	0.8342	Medium	11.69	11.76	1.693	33.857	0.6294	Medium	11.69	11.76	1.711	34.212	0.8219	Medium	11.69	11.76	2.478	49.558	0.8771	Medium	11.8	11.87	2.577	51.54	0.8097	Medium							11.69	11.76	3.246	64.916	0.8186	Medium	11.69
+ IPI 549	1035	1050	LMTGMPQLTSKEDIEY	10.99	2	13	10.75	11.14	5.047	38.821	0.8364	Medium	10.75	11.14	3.956	30.432	0.8122	Medium	10.75	11.13	4.263	32.789	0.8604	Medium	10.75	11.14	6.816	52.431	0.8733	Medium	10.75	11.14	6.321	48.622	0.8625	Medium							10.75	11.14	9.277	71.358	0.8712	Medium	10.75
+ IPI 549	1036	1042	MTGMPQL	11.2	1	4	10.87	11.12	2.035	50.866	0.7937	Medium	10.87	11.12	1.493	37.336	0.651	Medium	10.87	11.12	1.848	46.202	0.7951	Medium	10.87	11.12	2.801	70.025	0.8345	Medium	10.87	11.12	2.818	70.459	0.7881	Medium							10.87	11.12	3.238	80.956	0.8085	Medium	10.87
+ IPI 549	1050	1071	YIRDALTVGKNEEDAKKYFLDQ	9.72	4	20	9.77	9.87	2.702	13.512	0.926	High	9.77	9.87	2.47	12.349	0.9124	High	9.76	9.87	2.417	12.085	0.93	High	9.77	9.87	2.784	13.921	0.9326	High	9.77	9.87	2.778	13.888	0.9319	High							9.77	9.87	3.595	17.975	0.9237	High	9.77
+ IPI 549	1051	1069	IRDALTVGKNEEDAKKYFL	9.61	5	17	9.46	9.74	2.341	13.772	0.8577	Medium	9.46	9.74	1.906	11.215	0.7806	Medium	9.45	9.74	1.984	11.67	0.886	Medium	9.46	9.74	2.502	14.717	0.8837	Medium	9.46	9.74	2.318	13.634	0.8862	Medium							9.46	9.74	3.315	19.501	0.8445	Medium	9.46
+ IPI 549	1051	1071	IRDALTVGKNEEDAKKYFLDQ	9.5	3	19	9.26	9.72	2.66	14.002	0.8981	Medium	9.27	9.72	2.401	12.638	0.8518	Medium	9.26	9.71	2.389	12.576	0.911	High	9.27	9.72	2.755	14.498	0.9128	High	9.27	9.72	2.644	13.914	0.9208	High							9.27	9.72	3.524	18.547	0.8958	Medium	9.27
+ IPI 549	1051	1073	IRDALTVGKNEEDAKKYFLDQIE	10.45	4	21	10.22	10.62	2.501	11.909	0.8398	Medium	10.22	10.62	2.375	11.311	0.7668	Medium	10.22	10.61	2.297	10.94	0.8521	Medium	10.22	10.62	2.701	12.861	0.865	Medium	10.22	10.62	2.58	12.287	0.8488	Medium							10.22	10.62	3.363	16.013	0.823	Medium	10.22
+ IPI 549	1072	1084	IEVCRDKGWTVQF	11.18	3	11	11.09	11.16	1.539	13.995	0.906	High	11.09	11.16	1.336	12.149	0.8475	Medium	11.08	11.16	1.314	11.943	0.9065	High	11.09	11.16	3.646	33.144	0.9229	High	11.09	11.16	3.518	31.98	0.879	Medium							11.26	11.33	5.569	50.629	0.9244	Medium	11.25
+ IPI 549	1088	1092	LHLVL	11.09	2	3	10.84	10.92	1.377	45.885	0.893	Medium	10.94	11	0.905	30.161	0.8832	Medium	10.93	11	1.165	38.831	0.9269	Medium	10.85	10.93	2.586	86.196	0.9115	Medium	10.94	11	2.534	84.458	0.9175	Medium							10.94	11	2.62	87.342	0.9051	Medium	10.94
AZ2	6	12	YKQPVVL	8.77	1	4	8.68	8.89	3.698	92.462	0.9249	Medium	8.68	8.89	3.724	93.097	0.9142	Medium	8.67	8.88	3.706	92.646	0.9086	Medium	8.68	8.89	3.717	92.924	0.9192	Medium	8.68	8.89	3.729	93.213	0.9305	Medium	8.68	8.89	3.734	93.348	0.9004	Medium	8.68	8.89	3.737	93.422	0.9074	Medium	8.68
AZ2	36	41	ELIPIE	10.59	1	3	10.64	10.74	0.045	1.484	0.9088	Medium	10.64	10.73	0.048	1.615	0.8972	Medium	10.64	10.73	0.047	1.578	0.9019	Medium	10.64	10.73	0.075	2.512	0.9029	Medium	10.64	10.73	0.063	2.1	0.905	Medium	10.64	10.73	0.081	2.711	0.912	Medium	10.64	10.73	0.256	8.547	0.9015	Medium	10.64
AZ2	36	42	ELIPIEF	13.88	1	4	13.86	13.95	0.113	2.817	0.8135	Medium	13.96	14.03	0.089	2.213	0.7804	Medium	13.87	13.96	0.047	1.168	0.7716	Medium	13.86	13.96	0.142	3.561	0.843	Medium	13.86	13.96	0.107	2.677	0.782	Medium	13.94	14.02	0.07	1.739	0.7694	Medium	13.86	13.95	0.337	8.417	0.8218	Medium	13.86
AZ2	42	58	FVLPTSQRKCKSPETAL	8.48	3	13	8.09	8.77	4.728	36.37	0.9074	High	8.09	8.77	4.517	34.746	0.9008	High	8.09	8.77	4.341	33.393	0.9067	High	8.09	8.77	5.795	44.575	0.9324	High	8.09	8.77	5.602	43.094	0.9386	High	8.37	8.54	5.596	43.044	0.9493	High	8.09	8.77	6.806	52.353	0.9252	Medium	8.32
AZ2	42	59	FVLPTSQRKCKSPETALL	9.43	3	14	9.26	9.7	4.341	31.007	0.9135	Medium	9.26	9.7	3.945	28.175	0.9286	High	9.25	9.7	3.782	27.017	0.9262	High	9.26	9.7	5.451	38.933	0.9177	Medium	9.26	9.7	5.19	37.073	0.9077	Medium	9.26	9.7	5.001	35.722	0.9182	Medium	9.25	9.7	6.417	45.838	0.9166	Medium	9.25
AZ2	59	70	LHVAGHGNVEQM	6.54	2	10	6.78	6.87	1.565	15.651	0.849	Medium	6.78	6.86	1.367	13.67	0.856	Medium	6.78	6.86	1.421	14.21	0.8507	Medium	6.78	6.86	1.963	19.633	0.8722	Medium	6.78	6.86	1.798	17.983	0.8894	Medium	6.77	6.86	1.884	18.84	0.7456	Medium	6.73	6.8	2.339	23.391	0.9007	Medium	6.82
AZ2	59	72	LHVAGHGNVEQMKA	5.97	2	12	5.9	6.06	0.785	6.539	0.8853	Medium	5.9	6.06	0.67	5.583	0.8915	Medium	5.89	6.05	0.629	5.245	0.8835	Medium	5.9	6.06	1.34	11.165	0.9193	Medium	5.9	6.06	1.305	10.877	0.8899	Medium	5.9	6.06	1.18	9.83	0.8444	Medium	5.9	6.06	1.979	16.492	0.8986	Medium	5.9
AZ2	60	70	HVAGHGNVEQM	5.29	2	9	5.31	5.42	0.713	7.917	0.9133	High	5.31	5.42	0.633	7.03	0.9349	High	5.31	5.41	0.596	6.62	0.9289	High	5.31	5.42	1.21	13.444	0.928	High	5.31	5.42	1.216	13.511	0.9241	High	5.31	5.42	1.224	13.602	0.9352	High	5.31	5.42	1.844	20.484	0.9269	High	5.31
AZ2	60	74	HVAGHGNVEQMKAQV	5.94	3	13	5.9	6.24	0.788	6.065	0.7511	Medium	5.9	6.24	0.718	5.526	0.8023	Medium	5.89	6.23	0.675	5.196	0.7987	Medium	5.9	6.23	1.198	9.213	0.8096	Medium	5.9	6.23	1.176	9.047	0.7486	Medium	5.9	6.23	1.054	8.104	0.7417	Medium	5.9	6.23	1.834	14.11	0.782	Medium	5.9
AZ2	60	75	HVAGHGNVEQMKAQVW	8.28	3	14	8.16	8.49	0.509	3.639	0.7442	Medium	8.16	8.49	0.357	2.548	0.8582	Medium	8.15	8.48	0.369	2.633	0.8651	Medium	8.16	8.48	0.857	6.123	0.8243	Medium	8.16	8.48	0.815	5.822	0.8026	Medium	8.16	8.48	0.703	5.023	0.8557	Medium	8.16	8.48	1.47	10.502	0.7978	Medium	8.16
AZ2	71	76	KAQVWL	10.59	2	4	10.64	10.71	0.06	1.494	0.9522	Medium	10.64	10.71	0.062	1.547	0.9589	Medium	10.64	10.71	0.032	0.793	0.9626	Medium	10.64	10.71	0.032	0.79	0.9347	Medium	10.64	10.71	0.053	1.317	0.9489	Medium	10.64	10.71	0.066	1.641	0.9547	Medium	10.64	10.71	0.118	2.943	0.9401	Medium	10.64
AZ2	77	84	RALETSVA	6.28	2	6	6.07	6.15	2.597	43.279	0.8087	Medium	6.07	6.15	2.603	43.389	0.8365	Medium	6.03	6.1	2.538	42.296	0.8425	Medium	6.07	6.15	3.272	54.528	0.8125	Medium	6.07	6.15	3.237	53.951	0.7833	Medium	6.07	6.15	3.33	55.507	0.8102	Medium	6.07	6.15	3.961	66.016	0.8152	Medium	6.06
AZ2	79	84	LETSVA	6.27	1	4	6.19	6.28	2.522	63.057	0.8922	Medium	6.18	6.28	2.553	63.832	0.9183	Medium	6.18	6.27	2.461	61.528	0.9175	Medium	6.18	6.28	3.154	78.853	0.9264	Medium	6.18	6.28	3.166	79.154	0.9091	Medium	6.18	6.28	3.135	78.383	0.8908	Medium	6.18	6.27	3.45	86.241	0.9163	Medium	6.18
AZ2	79	86	LETSVAAD	6.15	1	6	5.98	6.38	4.099	68.314	0.7969	Medium	5.98	6.38	3.849	64.143	0.8911	Medium	5.98	6.37	3.759	62.653	0.8824	Medium	5.98	6.38	4.74	79.002	0.8372	Medium	5.98	6.38	4.75	79.159	0.8047	Medium	5.98	6.38	4.422	73.707	0.829	Medium	5.98	6.38	4.919	81.981	0.834	Medium	5.98
AZ2	87	99	FYHRLGPHHFLLL	10.38	2	10	10.4	10.48	0.474	4.735	0.8985	Medium	10.4	10.48	0.392	3.923	0.9072	Medium	10.4	10.48	0.367	3.672	0.9194	Medium	10.4	10.48	0.831	8.312	0.8963	Medium	10.4	10.48	0.806	8.057	0.9009	Medium	10.4	10.48	0.67	6.696	0.9139	Medium	10.4	10.48	1.06	10.603	0.8863	Medium	10.4
AZ2	88	98	YHRLGPHHFLL	8.43	4	8	8.58	8.67	0.561	7.016	0.8501	Medium	8.58	8.67	0.475	5.939	0.916	Medium	8.57	8.67	0.395	4.936	0.9149	Medium	8.58	8.67	0.9	11.245	0.8615	Medium	8.58	8.67	0.92	11.5	0.858	Medium	8.58	8.67	0.807	10.085	0.9195	Medium	8.58	8.67	1.199	14.984	0.8565	Medium	8.58
AZ2	88	99	YHRLGPHHFLLL	9.88	4	9	9.85	10.38	0.5	5.557	0.9	High	9.84	10.38	0.454	5.046	0.935	High	9.84	10.38	0.388	4.314	0.9498	High	9.84	10.38	0.921	10.238	0.9303	High	9.84	10.38	0.811	9.011	0.9425	High	9.84	10.38	0.754	8.379	0.9608	High	9.84	10.38	1.112	12.352	0.9339	High	9.84
AZ2	100	106	YQKKGQW	5.9	1	5	6	6.09	1.727	34.547	0.9029	Medium	6	6.09	1.709	34.171	0.9256	High	5.99	6.09	1.695	33.891	0.9316	High	6	6.09	2.758	55.15	0.9173	Medium	6	6.09	2.673	53.462	0.9198	High	6	6.09	2.713	54.258	0.8783	Medium	6	6.09	3.009	60.184	0.9166	Medium	6
AZ2	107	113	YEIYDKY	9.1	1	5	8.99	9.18	1.44	28.79	0.8091	Medium	8.99	9.18	1.418	28.355	0.9056	Medium	8.99	9.18	1.354	27.09	0.8786	Medium	8.99	9.18	2.178	43.56	0.8407	Medium	8.99	9.18	2.199	43.98	0.813	Medium	8.99	9.18	2.193	43.866	0.8418	Medium	8.99	9.18	2.864	57.272	0.8096	Medium	8.99
AZ2	107	118	YEIYDKYQVVQT	9.45	2	10	9.41	9.48	1.493	14.928	0.8342	Medium	9.41	9.48	1.363	13.63	0.9184	High	9.41	9.47	1.352	13.519	0.9055	High	9.41	9.47	2.274	22.741	0.8953	High	9.41	9.48	2.248	22.482	0.8791	Medium	9.41	9.48	2.161	21.605	0.9029	High	9.41	9.47	3.612	36.118	0.8794	Medium	9.41
AZ2	107	121	YEIYDKYQVVQTLDC	11.03	2	13	11.13	11.22	2.691	20.703	0.8932	Medium	11.13	11.22	2.525	19.426	0.9364	Medium	11.13	11.22	2.362	18.167	0.9348	Medium	11.13	11.22	3.461	26.624	0.8952	Medium	11.13	11.22	3.57	27.459	0.8683	Medium	11.13	11.22	3.238	24.908	0.9369	Medium	11.13	11.22	4.856	37.356	0.878	Medium	11.13
AZ2	114	119	QVVQTL	8.16	1	4	8.18	8.27	0.072	1.807	0.8319	Medium	8.17	8.27	0.056	1.4	0.8699	Medium	8.17	8.26	0.077	1.916	0.8588	Medium	8.17	8.27	0.069	1.713	0.9017	Medium	8.17	8.27	0.066	1.652	0.8437	Medium	8.17	8.27	0.069	1.722	0.7985	Medium	8.17	8.26	0.213	5.313	0.827	Medium	8.17
AZ2	122	137	LRYWKATHRSPGQIHL	7.45	4	13	7.44	7.95	0.827	6.365	0.9089	Medium	7.44	7.95	0.593	4.559	0.9013	Medium	7.44	7.94	0.529	4.071	0.9096	Medium	7.44	7.95	1.786	13.741	0.9034	Medium	7.44	7.95	1.571	12.086	0.8914	Medium	7.44	7.95	1.364	10.489	0.9005	Medium	7.44	7.95	3.256	25.049	0.9023	Medium	7.44
AZ2	125	137	WKATHRSPGQIHL	6.9	3	10	6.82	6.88	0.915	9.147	0.8381	Medium	6.81	6.88	0.705	7.045	0.847	Medium	6.81	6.88	0.932	9.317	0.8756	Medium	6.81	6.88	1.615	16.15	0.9161	Medium	6.81	6.88	1.571	15.71	0.8274	Medium	6.81	6.88	1.602	16.02	0.8551	Medium	6.81	6.88	2.214	22.136	0.9035	Medium	6.81
AZ2	138	149	VQRHPPSEESQA	4.07	2	8	3.94	4.38	3.37	42.129	0.9129	Medium	3.94	4.38	3.385	42.306	0.9382	High	3.94	4.38	3.293	41.159	0.9393	High	3.94	4.38	4.131	51.642	0.934	Medium	3.94	4.38	4.12	51.496	0.9209	Medium	3.94	4.38	4.186	52.33	0.9239	Medium	3.94	4.38	5.126	64.07	0.9282	Medium	3.94
AZ2	138	150	VQRHPPSEESQAF	6.68	2	9	6.54	6.95	2.998	33.309	0.8529	Medium	6.54	6.95	2.974	33.046	0.8951	Medium	6.53	6.94	2.854	31.707	0.8696	Medium	6.54	6.95	4.126	45.845	0.8699	Medium	6.54	6.95	4.056	45.064	0.862	Medium	6.54	6.95	4.188	46.537	0.8544	Medium	6.54	6.95	5.582	62.026	0.8516	Medium	6.54
AZ2	138	157	VQRHPPSEESQAFQRQLTAL	9.74	4	16	9.55	9.95	2.116	13.226	0.795	Medium	9.55	9.95	1.978	12.364	0.8622	Medium	9.55	9.94	1.821	11.382	0.8522	Medium	9.55	9.94	3.528	22.047	0.8186	Medium	9.55	9.95	3.436	21.478	0.8125	Medium	9.55	9.95	3.22	20.127	0.7984	Medium	9.55	9.94	5.818	36.362	0.785	Medium	9.55
AZ2	150	157	FQRQLTAL	9.07	2	6	9.05	9.14	0.169	2.809	0.9125	Medium	9.05	9.14	0.169	2.813	0.9045	Medium	9.04	9.14	0.155	2.578	0.9097	Medium	9.05	9.14	0.276	4.592	0.9194	High	9.05	9.14	0.269	4.488	0.9157	Medium	9.05	9.14	0.341	5.685	0.9203	Medium	9.05	9.14	1.041	17.343	0.916	High	9.05
AZ2	151	157	QRQLTAL	7.99	2	5	8.02	8.12	0.168	3.353	0.9447	High	8.02	8.12	0.136	2.714	0.9352	High	8.02	8.11	0.126	2.515	0.9431	High	8.02	8.11	0.246	4.918	0.9347	High	8.02	8.12	0.296	5.911	0.9427	Medium	8.02	8.11	0.289	5.774	0.9382	Medium	8.02	8.11	0.954	19.08	0.9264	High	8.02
AZ2	158	164	IGYDVTD	8.21	1	5	8.08	8.32	0.798	15.953	0.8608	Medium	8.08	8.32	0.793	15.852	0.9095	High	8.08	8.31	0.757	15.133	0.8878	High	8.08	8.32	1.116	22.32	0.8987	High	8.08	8.32	1.145	22.906	0.8552	Medium	8.08	8.32	1.168	23.352	0.865	Medium	8.08	8.31	2.412	48.232	0.8757	Medium	8.08
AZ2	158	173	IGYDVTDVSNVHDDEL	10.34	2	14	10.26	10.33	3.563	25.447	0.8999	Medium	10.26	10.33	3.431	24.508	0.9187	High	10.25	10.33	3.312	23.655	0.9347	High	10.25	10.33	4.905	35.033	0.9119	High	10.26	10.33	4.945	35.318	0.9038	Medium	10.26	10.33	4.471	31.939	0.8957	High	10.25	10.33	6.49	46.359	0.9002	High	10.25
AZ2	158	174	IGYDVTDVSNVHDDELE	9.9	2	15	9.86	9.93	3.533	23.554	0.9028	High	9.86	9.93	3.374	22.491	0.9004	High	9.86	9.93	3.332	22.21	0.9377	High	9.86	9.93	4.878	32.519	0.9247	High	9.86	9.93	4.77	31.797	0.8997	Medium	9.86	9.93	4.341	28.941	0.9042	High	9.86	9.93	6.588	43.92	0.9071	High	9.86
AZ2	161	174	DVTDVSNVHDDELE	8.32	2	12	8.49	8.59	3.313	27.611	0.8919	Medium	8.42	8.54	3.257	27.144	0.8087	Medium	8.21	8.62	3.214	26.784	0.9241	High	8.22	8.62	4.585	38.211	0.9177	High	8.22	8.62	4.488	37.403	0.9171	High	8.48	8.56	4.392	36.599	0.9011	High	8.51	8.58	5.54	46.167	0.8091	Medium	8.53
AZ2	165	175	VSNVHDDELEF	10.56	2	9	10.44	10.66	1.282	14.241	0.825	Medium	10.44	10.66	1.262	14.02	0.8415	Medium	10.44	10.66	1.21	13.442	0.8371	Medium	10.44	10.66	2.235	24.837	0.8449	Medium	10.44	10.66	2.118	23.534	0.8204	Medium	10.44	10.66	2.193	24.372	0.8109	Medium	10.44	10.66	2.807	31.191	0.8271	Medium	10.44
AZ2	174	182	EFTRRGLVT	7.02	2	7	6.99	7.08	0.198	2.825	0.9383	High	6.99	7.08	0.19	2.713	0.9485	High	6.99	7.08	0.205	2.933	0.9541	High	6.99	7.08	0.256	3.664	0.9312	High	6.99	7.08	0.251	3.59	0.9388	High	6.99	7.08	0.314	4.491	0.9502	High	6.99	7.08	0.663	9.474	0.9507	High	6.99
AZ2	174	185	EFTRRGLVTPRM	7.96	3	9	7.82	8.06	0.093	1.029	0.864	Medium	7.82	8.06	0.184	2.042	0.9097	Medium	7.82	8.05	0.196	2.177	0.91	Medium	7.82	8.06	0.168	1.863	0.8637	Medium	7.82	8.06	0.238	2.646	0.8876	Medium	7.82	8.06	0.271	3.014	0.9086	Medium	7.82	8.05	0.599	6.66	0.8715	Medium	7.82
AZ2	174	187	EFTRRGLVTPRMAE	7.6	2	11	7.55	7.63	0.343	3.122	0.7218	Medium	7.66	7.74	0.303	2.758	0.842	Medium	7.54	7.62	0.356	3.236	0.7698	Medium	7.54	7.63	0.419	3.805	0.8615	Medium	7.68	7.75	0.532	4.837	0.8491	Medium	7.72	7.8	0.456	4.148	0.8163	Medium	7.54	7.63	0.918	8.348	0.8132	Medium	7.54
AZ2	174	195	EFTRRGLVTPRMAEVASRDPKL	8.28	5	18	8.13	8.45	1.241	6.892	0.8026	Medium	8.13	8.45	1.181	6.561	0.8768	Medium	8.13	8.45	1.162	6.455	0.9012	Medium	8.13	8.45	2.097	11.651	0.8373	Medium	8.13	8.45	1.768	9.825	0.8529	Medium	8.13	8.45	1.732	9.625	0.8614	Medium	8.13	8.45	3.453	19.182	0.8	Medium	8.13
AZ2	175	182	FTRRGLVT	6.2	2	6	6.13	6.34	0.195	3.25	0.9149	Medium	6.13	6.34	0.206	3.433	0.9042	Medium	6.13	6.34	0.206	3.427	0.9033	Medium	6.13	6.34	0.273	4.558	0.9392	Medium	6.13	6.34	0.256	4.266	0.8926	Medium	6.13	6.34	0.303	5.055	0.9116	Medium	6.13	6.34	0.657	10.957	0.9349	Medium	6.13
AZ2	176	182	TRRGLVT	4.73	2	5	4.86	4.95	0.193	3.861	0.9415	Medium	4.86	4.95	0.162	3.245	0.9348	Medium	4.85	4.94	0.158	3.163	0.9513	Medium	4.86	4.95	0.223	4.455	0.9275	Medium	4.86	4.95	0.214	4.273	0.938	Medium	4.86	4.95	0.25	5	0.9447	Medium	4.86	4.95	0.632	12.637	0.9465	Medium	4.86
AZ2	176	185	TRRGLVTPRM	6.49	2	7	6.5	6.6	0.202	2.884	0.824	Medium	6.5	6.6	0.247	3.534	0.8633	Medium	6.5	6.59	0.212	3.027	0.8662	Medium	6.5	6.6	0.259	3.698	0.9201	High	6.5	6.6	0.251	3.579	0.8701	Medium	6.5	6.59	0.346	4.942	0.8109	Medium	6.5	6.59	0.633	9.048	0.9137	High	6.5
AZ2	183	195	PRMAEVASRDPKL	6.78	3	10	6.66	6.99	1.555	15.546	0.8835	Medium	6.66	6.99	1.299	12.994	0.9119	Medium	6.66	6.99	1.225	12.251	0.9151	Medium	6.66	6.99	1.865	18.648	0.9038	Medium	6.66	6.99	1.818	18.18	0.9082	Medium	6.66	6.99	1.949	19.489	0.9036	Medium	6.66	6.99	3.143	31.433	0.8949	Medium	6.66
AZ2	186	195	AEVASRDPKL	5.95	2	7	5.87	6.28	1.258	17.976	0.9379	High	5.87	6.28	1.262	18.033	0.9398	High	5.87	6.27	1.194	17.062	0.9462	High	5.87	6.28	1.846	26.368	0.9409	High	5.87	6.28	1.822	26.031	0.9307	High	5.87	6.28	1.884	26.914	0.9368	High	5.87	6.27	2.921	41.727	0.9379	High	5.87
AZ2	188	195	VASRDPKL	5.26	2	5	5.21	5.59	1.214	24.288	0.8104	Medium	5.21	5.59	1.221	24.422	0.8564	Medium	5.2	5.58	1.146	22.921	0.8454	Medium	5.21	5.59	1.746	34.929	0.9236	High	5.21	5.59	1.705	34.1	0.9219	High	5.21	5.59	1.738	34.759	0.9107	High	5.21	5.59	2.441	48.823	0.9068	Medium	5.21
AZ2	196	211	YAMHPWVTSKPLPEYL	11.65	3	11	11.54	12.1	3.169	28.809	0.9162	High	11.54	12.1	3.127	28.428	0.9013	High	11.54	12.1	3.004	27.311	0.9056	High	11.54	12.1	4.315	39.226	0.9133	High	11.54	12.1	4.167	37.88	0.9095	High	11.54	12.1	4.096	37.241	0.924	High	11.54	12.1	5.443	49.484	0.9058	High	11.54
AZ2	212	221	WKKIANNCIF	10.39	2	8	10.45	10.52	2.141	26.758	0.9316	High	10.45	10.52	2.012	25.146	0.9035	High	10.45	10.51	1.935	24.191	0.9238	High	10.45	10.51	3.152	39.395	0.9265	High	10.45	10.52	3.028	37.855	0.9364	High	10.45	10.52	3.062	38.279	0.9398	High	10.45	10.51	4.803	60.041	0.9389	High	10.45
AZ2	222	232	IVIHRSTTSQT	4.59	2	9	4.64	4.73	3.132	34.804	0.9318	Medium	4.64	4.73	3.053	33.926	0.9483	Medium	4.64	4.73	3.015	33.495	0.9576	Medium	4.64	4.73	3.247	36.083	0.949	Medium	4.64	4.73	3.332	37.018	0.9373	Medium	4.64	4.73	3.276	36.396	0.9394	Medium	4.64	4.73	3.535	39.279	0.9409	Medium	4.64
AZ2	223	233	VIHRSTTSQTI	4.58	3	9	4.55	4.93	3.19	35.443	0.852	Medium	4.55	4.93	3.044	33.823	0.9051	Medium	4.55	4.92	3.011	33.461	0.9028	Medium	4.55	4.92	3.284	36.487	0.9013	Medium	4.55	4.92	3.316	36.845	0.8797	Medium	4.55	4.92	3.223	35.807	0.8871	Medium	4.54	4.92	3.536	39.285	0.865	Medium	4.55
AZ2	232	245	TIKVSPDDTPGAIL	10.16	2	10	10.12	10.13	1.424	14.237	0.8242	Medium	10.12	10.13	1.452	14.515	0.9041	Medium	10.12	10.13	1.356	13.563	0.8884	Medium	10.12	10.13	2.381	23.807	0.8319	Medium	10.17	10.21	2.277	22.774	0.8531	Medium	10.12	10.13	2.266	22.664	0.8518	Medium	10.12	10.13	3.227	32.274	0.7789	Medium	10.12
AZ2	233	245	IKVSPDDTPGAIL	9.99	2	9	9.79	10.26	1.002	11.13	0.9343	High	9.79	10.26	0.969	10.765	0.9198	High	9.78	10.25	0.93	10.329	0.9044	High	9.78	10.25	1.355	15.051	0.9309	High	9.79	10.26	1.298	14.427	0.927	High	9.79	10.26	1.344	14.931	0.9291	High	9.78	10.25	2.265	25.168	0.9169	High	9.78
AZ2	249	269	FTKMAKKKSLMDIPESQSEQD	7.24	4	18	7.57	7.66	9.881	54.892	0.9132	High	7.19	7.74	9.82	54.557	0.8946	High	7.19	7.73	9.623	53.463	0.9323	High	7.19	7.74	10.998	61.1	0.9238	High	7.19	7.74	10.863	60.348	0.926	High	7.28	7.36	10.707	59.481	0.9271	High	7.46	7.53	10.975	60.973	0.916	High	7.42
AZ2	270	278	FVLRVCGRD	8.8	3	7	8.91	9	0.365	5.217	0.865	Medium	8.91	9	0.271	3.871	0.883	Medium	8.91	8.99	0.248	3.544	0.8928	Medium	8.91	9	0.516	7.377	0.8594	Medium	8.91	9	0.449	6.413	0.8572	Medium	8.91	9	0.487	6.951	0.9131	Medium	8.91	8.99	1.12	15.999	0.8599	Medium	8.91
AZ2	270	281	FVLRVCGRDEYL	11.08	3	10	11.11	11.21	0.239	2.388	0.7951	Medium	11.1	11.2	0.206	2.057	0.9282	Medium	11.1	11.2	0.219	2.188	0.93	Medium	11.1	11.2	0.423	4.23	0.8541	Medium	11.1	11.2	0.445	4.445	0.7312	Medium	11.1	11.2	0.457	4.568	0.9005	Medium	11.1	11.2	0.843	8.427	0.846	Medium	11.1
AZ2	282	291	VGETPIKNFQ	8	1	7	8	8.09	0.682	9.748	0.9028	Medium	8	8.09	0.676	9.655	0.9233	High	7.99	8.09	0.673	9.612	0.8985	High	8	8.09	0.686	9.798	0.9265	High	8	8.09	0.694	9.916	0.8987	High	8	8.09	0.74	10.569	0.8408	Medium	8	8.09	0.746	10.658	0.907	Medium	8
AZ2	282	291	VGETPIKNFQ	8	2	7	7.84	8.35	0.638	9.108	0.9197	High	7.84	8.35	0.656	9.376	0.9148	High	7.83	8.35	0.714	10.206	0.9037	High	7.84	8.35	0.68	9.72	0.9227	High	7.84	8.35	0.676	9.652	0.9037	High	7.84	8.35	0.703	10.047	0.9258	High	7.84	8.35	0.776	11.092	0.9332	High	7.84
AZ2	282	307	VGETPIKNFQWVRHCLKNGEEIHVVL	11.24	4	23	11.26	11.35	1.332	5.792	0.7538	Medium	11.25	11.35	1.306	5.679	0.8894	Medium	11.25	11.35	1.147	4.985	0.895	Medium	11.25	11.35	3.594	15.626	0.8658	Medium	11.26	11.35	3.386	14.723	0.877	Medium	11.25	11.35	3.258	14.164	0.9	Medium	11.25	11.34	5.042	21.922	0.8156	Medium	11.25
AZ2	292	302	WVRHCLKNGEE	5.33	3	9	5.45	5.56	0.803	8.926	0.9532	High	5.45	5.56	0.754	8.381	0.9522	High	5.45	5.56	0.701	7.788	0.9281	High	5.45	5.56	1.923	21.371	0.9576	High	5.45	5.56	1.891	21.006	0.9258	High	5.45	5.56	1.854	20.601	0.9559	High	5.45	5.56	2.327	25.857	0.9446	High	5.45
AZ2	292	307	WVRHCLKNGEEIHVVL	8.82	4	14	8.75	9.25	0.91	6.501	0.8732	Medium	8.75	9.25	0.743	5.308	0.8922	Medium	8.75	9.25	0.679	4.853	0.903	Medium	8.75	9.25	2.536	18.112	0.8664	Medium	8.75	9.25	2.439	17.422	0.8786	Medium	8.75	9.25	2.106	15.041	0.9265	Medium	8.75	9.25	3.604	25.742	0.8499	Medium	8.75
AZ2	308	315	DTPPDPAL	8.37	1	3	8.36	8.44	0.727	24.236	0.8963	Medium	8.36	8.44	0.72	23.998	0.8978	Medium	8.36	8.44	0.672	22.414	0.91	Medium	8.36	8.44	1.35	45.013	0.915	Medium	8.36	8.44	1.348	44.932	0.9054	Medium	8.36	8.44	1.385	46.167	0.8858	Medium	8.36	8.44	1.732	57.723	0.8842	Medium	8.36
AZ2	316	335	DEVRKEEWPLVDDCTGVTGY	12.39	2	17	12.29	12.63	8.01	47.117	0.9182	High	12.29	12.63	8.031	47.243	0.812	Medium	12.37	12.46	7.869	46.286	0.8488	Medium	12.29	12.63	8.734	51.376	0.9339	High	12.29	12.63	8.65	50.883	0.8992	Medium	12.29	12.63	8.517	50.1	0.8925	Medium	12.28	12.63	9.593	56.427	0.9135	Medium	12.28
AZ2	316	339	DEVRKEEWPLVDDCTGVTGYHEQL	11.9	3	21	11.96	12.03	9.443	44.968	0.863	Medium	11.96	12.03	9.211	43.864	0.815	Medium	11.96	12.03	8.85	42.141	0.8727	Medium	11.96	12.03	10.23	48.713	0.8393	Medium	11.96	12.03	10.044	47.827	0.8791	Medium	11.96	12.03	10.574	50.351	0.7949	Medium	11.93	12.02	10.902	51.912	0.7855	Medium	11.96
AZ2	328	339	DCTGVTGYHEQL	8.95	2	10	8.78	9.03	6.493	64.932	0.8104	Medium	8.78	9.03	6.398	63.981	0.8722	Medium	8.78	9.03	6.146	61.462	0.8653	Medium	8.78	9.03	6.633	66.335	0.8438	Medium	8.78	9.03	6.702	67.022	0.8331	Medium	8.78	9.03	6.703	67.033	0.8634	Medium	8.85	8.93	6.912	69.122	0.8351	Medium	8.78
AZ2	336	350	HEQLTIHGKDHESVF	7.44	3	13	7.38	7.86	5.303	40.79	0.8601	Medium	7.38	7.86	4.494	34.57	0.9039	Medium	7.37	7.85	4.421	34.005	0.9078	Medium	7.38	7.85	5.521	42.468	0.8742	Medium	7.38	7.85	5.56	42.767	0.8367	Medium	7.38	7.85	4.607	35.435	0.8929	Medium	7.37	7.85	5.782	44.478	0.8546	Medium	7.37
AZ2	340	350	TIHGKDHESVF	6.75	2	9	6.76	6.86	2.451	27.233	0.9171	High	6.76	6.86	2.368	26.308	0.892	High	6.75	6.85	2.302	25.578	0.9073	High	6.75	6.86	2.488	27.646	0.9282	High	6.75	6.86	2.513	27.922	0.9207	High	6.75	6.86	2.426	26.95	0.9102	High	6.75	6.85	2.535	28.164	0.925	High	6.75
AZ2	355	379	WDCDRKFRVKIRGIDIPVLPRNTDL	10.43	5	21	10.59	10.69	3.415	16.263	0.7656	Medium	10.59	10.68	3.433	16.347	0.8406	Medium	10.59	10.68	3.182	15.155	0.8246	Medium	10.59	10.68	4.266	20.315	0.7813	Medium	10.59	10.68	4.472	21.294	0.7579	Medium	10.59	10.68	4.292	20.438	0.8346	Medium	10.59	10.68	6.103	29.064	0.8932	Medium	10.59
AZ2	370	379	IPVLPRNTDL	9.61	2	7	9.54	9.62	3.955	56.502	0.7951	Medium	9.53	9.62	3.946	56.378	0.8508	Medium	9.49	9.57	3.953	56.465	0.8057	Medium	9.5	9.57	4.556	65.092	0.7799	Medium	9.48	9.57	4.497	64.237	0.7023	Medium	9.53	9.62	4.468	63.825	0.8024	Medium	9.53	9.62	5.554	79.342	0.9069	Medium	9.53
AZ2	382	394	FVEANIQHGQQVL	9.08	2	11	8.98	9.38	1.467	13.337	0.8406	Medium	8.98	9.37	1.527	13.884	0.9214	High	8.98	9.37	1.407	12.792	0.9042	Medium	8.98	9.37	2.094	19.041	0.854	Medium	8.98	9.37	1.985	18.043	0.8656	Medium	8.98	9.37	2.125	19.318	0.9043	Medium	8.98	9.37	2.488	22.618	0.9183	High	8.98
AZ2	383	394	VEANIQHGQQVL	7.88	2	10	7.72	8.3	1.417	14.172	0.836	Medium	7.72	8.3	1.496	14.958	0.9011	Medium	7.72	8.3	1.422	14.221	0.885	Medium	7.72	8.3	1.94	19.399	0.8252	Medium	7.72	8.3	1.947	19.474	0.8524	Medium	7.72	8.3	2.105	21.048	0.8792	Medium	7.72	8.3	2.597	25.972	0.9165	High	7.72
AZ2	395	407	CQRRTSPKPFTEE	5.48	3	9	5.45	5.98	1.23	13.665	0.8097	Medium	5.45	5.98	1.109	12.324	0.8899	Medium	5.45	5.98	1.061	11.788	0.8839	Medium	5.45	5.98	1.835	20.393	0.8674	Medium	5.45	5.98	1.771	19.675	0.8493	Medium	5.45	5.98	1.734	19.262	0.8707	Medium	5.45	5.98	2.868	31.872	0.9453	High	5.45
AZ2	417	428	SIKIKDLPKGAL	8.16	2	9	8.2	8.29	0.349	3.877	0.9299	Medium	8.2	8.29	0.374	4.161	0.9174	Medium	8.2	8.29	0.332	3.687	0.9316	Medium	8.2	8.29	0.885	9.836	0.9292	Medium	8.2	8.29	0.869	9.651	0.9432	Medium	8.2	8.29	0.833	9.258	0.9258	Medium	8.2	8.29	1.965	21.833	0.9332	Medium	8.2
AZ2	463	468	YVNLLL	13.37	1	4	13.38	13.46	0.078	1.957	0.6306	Medium	13.4	13.48	0.098	2.451	0.7531	Medium	13.41	13.48	0.018	0.439	0.7049	Medium	13.36	13.44	0.129	3.225	0.6889	Medium	13.43	13.5	0.058	1.439	0.6893	Medium	13.44	13.51	0.174	4.359	0.6657	Medium	13.32	13.41	0.386	9.646	0.8074	Medium	13.32
AZ2	467	479	LLIDHRFLLRRGE	8.97	4	11	9.03	9.13	0.769	6.987	0.8588	Medium	9.03	9.13	0.646	5.872	0.9236	Medium	9.03	9.13	0.64	5.822	0.9191	Medium	9.03	9.13	1.697	15.429	0.8592	Medium	9.03	9.13	1.645	14.955	0.8039	Medium	9.03	9.13	1.59	14.456	0.8622	Medium	9.03	9.13	2.594	23.583	0.9256	High	9.03
AZ2	467	480	LLIDHRFLLRRGEY	9.61	4	12	9.59	9.66	0.756	6.301	0.9247	High	9.58	9.66	0.67	5.585	0.9186	Medium	9.58	9.66	0.607	5.06	0.9196	Medium	9.57	9.7	1.852	15.436	0.7463	Medium	9.58	9.66	1.606	13.382	0.9253	High	9.58	9.66	1.587	13.221	0.9213	Medium	9.58	9.66	2.603	21.692	0.9464	High	9.58
AZ2	485	497	WQISGKGEDQGSF	9.72	2	11	9.88	9.95	6.821	62.009	0.8	Medium	9.88	9.95	6.301	57.28	0.8932	Medium	9.88	9.94	6.105	55.498	0.8991	Medium	9.88	9.94	7.267	66.067	0.7912	Medium	9.95	10.02	7.045	64.044	0.7724	Medium	9.88	9.95	6.039	54.903	0.9105	Medium	9.88	9.94	7.964	72.396	0.8834	Medium	9.88
AZ2	498	515	NADKLTSATNPDKENSMS	6	3	15	5.75	6.45	2.887	19.244	0.844	Medium	5.75	6.45	2.884	19.225	0.9278	High	5.74	6.45	2.799	18.658	0.9063	Medium	5.75	6.45	4.516	30.104	0.8787	Medium	5.75	6.45	4.316	28.776	0.8677	Medium	5.75	6.45	4.417	29.45	0.8892	Medium	5.75	6.45	6.158	41.053	0.9288	High	5.75
AZ2	498	517	NADKLTSATNPDKENSMSIS	7.37	3	17	7.22	7.55	2.941	17.299	0.5419	Medium	7.22	7.54	2.745	16.148	0.7518	Medium	7.21	7.54	2.429	14.287	0.6999	Medium	7.22	7.54	4.498	26.461	0.6718	Medium	7.22	7.54	3.904	22.965	0.6396	Medium	7.22	7.54	4.076	23.979	0.7097	Medium	7.22	7.54	6.009	35.344	0.7592	Medium	7.22
AZ2	520	551	LDNYCHPIALPKHQPTPDPEGDRVRAEMPNQL	8.81	4	24	8.61	9.31	11.989	49.953	0.8392	Medium	8.61	9.31	12.026	50.108	0.9156	High	8.61	9.3	11.712	48.801	0.9033	High	8.61	9.31	13.6	56.669	0.8877	High	8.61	9.31	13.313	55.473	0.8682	High	8.61	9.31	13.381	55.754	0.8843	Medium	8.61	9.31	14.419	60.08	0.9296	High	8.61
AZ2	523	551	YCHPIALPKHQPTPDPEGDRVRAEMPNQL	8.37	5	21	8.18	8.63	10.648	50.703	0.5436	Medium	8.17	8.63	10.664	50.782	0.7839	Medium	8.17	8.62	10.682	50.866	0.7279	Medium	8.17	8.63	12.065	57.453	0.6437	Medium	8.38	8.46	12.177	57.987	0.6734	Medium	8.39	8.51	11.894	56.637	0.7876	Medium	8.17	8.63	12.89	61.379	0.794	Medium	8.17
AZ2	557	573	AIIATDPLNPLTAEDKE	10.7	2	13	10.71	10.79	5.645	43.427	0.866	Medium	10.64	10.73	5.449	41.915	0.9187	High	10.64	10.73	5.356	41.202	0.8956	High	10.64	10.73	7.88	60.615	0.908	High	10.64	10.73	7.857	60.441	0.8547	Medium	10.64	10.73	7.754	59.645	0.9058	High	10.64	10.73	9.769	75.145	0.8974	High	10.64
AZ2	557	578	AIIATDPLNPLTAEDKELLWHF	13.73	3	18	13.79	13.87	5.95	33.055	0.8339	Medium	13.72	13.8	5.623	31.237	0.7614	Medium	13.67	13.76	5.576	30.978	0.727	Medium	13.67	13.76	9.041	50.226	0.8042	Medium	13.8	13.87	9.073	50.405	0.7922	Medium	13.78	13.85	8.991	49.952	0.7322	Medium	13.67	13.76	12.894	71.631	0.8443	Medium	13.67
AZ2	558	571	IIATDPLNPLTAED	11.47	1	10	11.42	11.51	4.659	46.591	0.7895	Medium	11.41	11.51	4.664	46.641	0.7271	Medium	11.41	11.51	4.589	45.891	0.7556	Medium	11.41	11.51	6.665	66.655	0.8368	Medium	11.41	11.51	6.694	66.939	0.6974	Medium	11.41	11.51	6.518	65.179	0.7301	Medium	11.44	11.51	7.324	73.236	0.6986	Medium	11.41
AZ2	558	573	IIATDPLNPLTAEDKE	10.38	2	12	10.49	10.58	5.173	43.111	0.8296	Medium	10.49	10.57	5.061	42.176	0.8488	Medium	10.49	10.57	4.875	40.625	0.8143	Medium	10.49	10.57	7.311	60.923	0.811	Medium	10.49	10.57	7.285	60.706	0.8191	Medium	10.49	10.57	7.246	60.386	0.8328	Medium	10.49	10.57	8.67	72.247	0.815	Medium	10.49
AZ2	558	578	IIATDPLNPLTAEDKELLWHF	13.68	3	17	13.81	13.88	5.618	33.044	0.8774	Medium	13.49	13.96	5.284	31.084	0.8656	Medium	13.49	13.96	5.291	31.125	0.8762	Medium	13.49	13.96	8.491	49.946	0.9308	High	13.49	13.96	8.509	50.052	0.904	Medium	13.71	13.8	8.219	48.347	0.8811	Medium	13.48	13.95	11.501	67.651	0.9096	High	13.48
AZ2	559	573	IATDPLNPLTAEDKE	9.92	2	11	9.87	9.9	5.363	48.752	0.6631	Medium	9.87	9.9	5.195	47.224	0.7785	Medium	9.87	9.89	4.986	45.328	0.7737	Medium	9.87	9.89	6.789	61.72	0.7247	Medium	9.87	9.89	7.156	65.055	0.7193	Medium	9.87	9.9	6.358	57.796	0.6532	Medium	9.87	9.89	8.476	77.056	0.7144	Medium	9.87
AZ2	574	578	LLWHF	13.11	2	3	12.95	13.03	0.466	15.526	0.7927	Medium	13.1	13.18	0.523	17.421	0.9334	High	13.1	13.18	0.497	16.559	0.9171	High	13.1	13.18	1.095	36.484	0.9373	High	13.1	13.18	1.12	37.337	0.9177	High	13.21	13.29	1.117	37.234	0.9098	High	13.1	13.17	1.746	58.206	0.9431	High	13.1
AZ2	579	592	RYESLKHPKAYPKL	6.32	4	10	6.48	6.56	2.601	26.015	0.9343	High	6.37	6.47	2.406	24.062	0.9037	Medium	6.36	6.47	2.317	23.169	0.8883	Medium	6.37	6.47	4.384	43.841	0.9032	Medium	6.37	6.47	4.35	43.503	0.8909	Medium	6.33	6.41	4.559	45.588	0.8662	Medium	6.37	6.47	5.461	54.609	0.8749	Medium	6.37
AZ2	602	607	EIVAKT	4.54	1	4	4.6	4.69	1.44	36.005	0.8999	Medium	4.6	4.69	1.434	35.85	0.8323	Medium	4.6	4.68	1.439	35.969	0.8375	Medium	4.6	4.69	2.467	61.669	0.9309	Medium	4.66	4.73	2.452	61.288	0.8472	Medium	4.6	4.69	2.43	60.755	0.9135	Medium	4.6	4.69	3.443	86.076	0.928	Medium	4.6
AZ2	611	622	LARREVWDQSAL	9.4	2	10	9.33	9.43	6.518	65.175	0.9045	Medium	9.33	9.43	6.375	63.754	0.9007	Medium	9.33	9.42	6.28	62.8	0.9151	Medium	9.33	9.42	6.774	67.743	0.8999	High	9.33	9.42	6.791	67.914	0.8938	Medium	9.33	9.43	6.702	67.019	0.8809	Medium	9.33	9.42	6.897	68.972	0.9035	High	9.33
AZ2	612	622	ARREVWDQSAL	9.08	3	9	9.13	9.22	6.01	66.773	0.9305	High	9.13	9.22	5.911	65.681	0.9076	High	9.13	9.22	5.862	65.131	0.9173	High	9.13	9.22	6.042	67.139	0.9412	High	9.13	9.22	6.085	67.615	0.922	High	9.13	9.22	6.147	68.3	0.9001	High	9.13	9.22	6.163	68.476	0.945	High	9.13
AZ2	623	630	DVGLTMQL	11.91	2	6	12.11	12.19	1.263	21.056	0.7576	Medium	12.11	12.19	1.07	17.826	0.9089	Medium	12.11	12.19	1.107	18.455	0.912	Medium	12.11	12.18	2.712	45.196	0.8118	Medium	12.11	12.19	2.697	44.954	0.7571	Medium	12.11	12.19	2.236	37.267	0.8687	Medium	12.11	12.18	4.278	71.295	0.7992	Medium	12.11
AZ2	631	635	LDCNF	10.64	1	3	10.69	10.77	0.787	26.242	0.9224	Medium	10.6	10.68	0.737	24.568	0.9181	Medium	10.68	10.77	0.683	22.775	0.9096	Medium	10.68	10.77	1.459	48.646	0.9313	Medium	10.68	10.77	1.406	46.861	0.9328	Medium	10.68	10.77	1.403	46.782	0.9393	Medium	10.68	10.77	2.033	67.768	0.9304	Medium	10.68
AZ2	636	642	SDENVRA	4.34	1	5	4.36	4.4	1.03	20.6	0.7777	Medium	4.36	4.4	0.935	18.693	0.8801	Medium	4.36	4.4	0.869	17.387	0.9091	Medium	4.36	4.39	1.525	30.496	0.8772	Medium	4.36	4.4	1.594	31.876	0.8317	Medium	4.36	4.39	1.574	31.473	0.8124	Medium	4.36	4.39	2.823	56.461	0.8836	Medium	4.36
AZ2	643	650	IAVQKLES	6.86	1	6	6.85	6.87	0.832	13.875	0.7977	Medium	6.85	6.86	0.822	13.699	0.8226	Medium	6.84	6.86	0.888	14.805	0.8199	Medium	6.85	6.86	1.124	18.729	0.8484	Medium	6.85	6.86	1.176	19.598	0.8216	Medium	6.85	6.86	0.958	15.96	0.7414	Medium	6.85	6.86	2.273	37.878	0.7072	Medium	6.85
AZ2	643	651	IAVQKLESL	9.62	1	7	9.43	9.8	0.908	12.968	0.834	Medium	9.43	9.8	0.973	13.893	0.8923	Medium	9.43	9.8	0.875	12.501	0.9052	Medium	9.43	9.8	1.173	16.761	0.8986	Medium	9.43	9.8	1.145	16.359	0.8538	Medium	9.43	9.8	1.235	17.644	0.8484	Medium	9.43	9.8	2.574	36.773	0.8255	Medium	9.43
AZ2	643	654	IAVQKLESLEDD	9.34	2	10	9.27	9.35	1.781	17.806	0.8302	Medium	9.27	9.35	1.845	18.452	0.9143	Medium	9.26	9.35	1.749	17.49	0.9059	Medium	9.26	9.35	2.606	26.063	0.8955	Medium	9.27	9.35	2.525	25.253	0.8455	Medium	9.27	9.35	2.535	25.354	0.8624	Medium	9.26	9.35	3.822	38.219	0.8777	Medium	9.26
AZ2	643	657	IAVQKLESLEDDDVL	11.41	2	13	11.21	11.5	1.862	14.323	0.7696	Medium	11.21	11.5	1.803	13.87	0.8195	Medium	11.21	11.5	1.719	13.225	0.824	Medium	11.21	11.5	2.587	19.898	0.801	Medium	11.21	11.5	2.588	19.909	0.7962	Medium	11.21	11.5	2.538	19.526	0.7637	Medium	11.21	11.5	4.307	33.13	0.7996	Medium	11.21
AZ2	652	657	EDDDVL	9.03	1	4	9.09	9.17	0.222	5.554	0.7862	Medium	9.18	9.27	0.227	5.668	0.8697	Medium	9.09	9.17	0.257	6.416	0.8406	Medium	9.09	9.17	0.325	8.116	0.8711	Medium	9.09	9.17	0.293	7.322	0.8621	Medium	9.19	9.27	0.327	8.173	0.87	Medium	9.09	9.17	1.04	25.992	0.8478	Medium	9.09
AZ2	654	662	DDVLHYLLQ	12.91	2	7	12.91	13.02	0.161	2.306	0.6981	Medium	12.91	13.02	0.159	2.277	0.8114	Medium	12.91	13.02	0.175	2.503	0.805	Medium	12.91	13.02	0.491	7.008	0.6981	Medium	12.91	13.02	0.554	7.912	0.7514	Medium	12.91	13.02	0.611	8.729	0.7555	Medium	12.91	13.01	1.691	24.153	0.6972	Medium	12.91
AZ2	655	662	DVLHYLLQ	12.82	2	6	12.59	12.95	0.136	2.275	0.7442	Medium	12.59	12.95	0.166	2.761	0.8483	Medium	12.59	12.95	0.128	2.137	0.8379	Medium	12.59	12.95	0.618	10.308	0.7838	Medium	12.59	12.95	0.555	9.246	0.8072	Medium	12.59	12.95	0.541	9.022	0.7928	Medium	12.59	12.95	1.814	30.23	0.7854	Medium	12.59
AZ2	655	663	DVLHYLLQL	14.29	2	7	14.17	14.52	0.17	2.435	0.8549	Medium	14.17	14.53	0.226	3.232	0.8913	Medium	14.18	14.53	0.148	2.119	0.8734	Medium	14.17	14.53	0.631	9.009	0.8889	Medium	14.17	14.53	0.624	8.919	0.8787	Medium	14.17	14.53	0.647	9.243	0.8659	Medium	14.17	14.52	1.89	27.001	0.8899	Medium	14.17
AZ2	658	665	HYLLQLVQ	11.67	2	6	11.66	11.68	0.21	3.493	0.6534	Medium	11.66	11.68	0.143	2.375	0.8247	Medium	11.66	11.68	0.093	1.545	0.8304	Medium	11.66	11.68	0.112	1.869	0.6679	Medium	11.66	11.68	0.163	2.719	0.7449	Medium	11.66	11.68	0.357	5.953	0.7999	Medium	11.65	11.68	0.634	10.561	0.6217	Medium	11.66
AZ2	663	677	LVQAVKFEPYHDSAL	9.66	3	12	9.66	9.75	0.533	4.444	0.9063	Medium	9.66	9.75	0.494	4.117	0.9271	High	9.66	9.75	0.45	3.747	0.9384	High	9.66	9.75	0.875	7.291	0.9372	High	9.66	9.75	0.831	6.921	0.9276	High	9.66	9.75	0.854	7.119	0.9259	Medium	9.66	9.75	1.05	8.746	0.9248	High	9.66
AZ2	664	677	VQAVKFEPYHDSAL	9.26	2	11	9.12	9.53	0.536	4.875	0.9099	Medium	9.11	9.53	0.479	4.353	0.9425	Medium	9.11	9.52	0.473	4.303	0.9399	Medium	9.11	9.52	0.878	7.981	0.9314	Medium	9.11	9.53	0.843	7.664	0.9269	Medium	9.11	9.53	0.842	7.656	0.935	Medium	9.11	9.52	1.06	9.635	0.9194	Medium	9.11
AZ2	666	677	AVKFEPYHDSAL	8.87	2	9	8.86	8.96	0.52	5.773	0.8445	Medium	8.86	8.96	0.501	5.564	0.8247	Medium	8.86	8.95	0.468	5.198	0.8623	Medium	8.86	8.95	0.854	9.49	0.8912	Medium	8.86	8.95	0.9	10.001	0.8406	Medium	8.86	8.95	0.833	9.253	0.7877	Medium	8.86	8.95	1.06	11.775	0.9111	Medium	8.86
AZ2	681	697	LLKRGLRNKRIGHFLFW	10.27	5	15	10.49	10.58	0.079	0.527	0.9513	High	10.49	10.58	0.038	0.254	0.9277	Medium	10.49	10.58	0.059	0.396	0.9495	High	10.49	10.58	0.14	0.935	0.9564	High	10.49	10.58	0.078	0.518	0.9438	High	10.49	10.58	0.073	0.489	0.9369	Medium	10.49	10.58	0.314	2.095	0.946	High	10.49
AZ2	698	713	FLRSEIAQSRHYQQRF	7.69	4	14	7.52	7.93	0.814	5.813	0.8828	Medium	7.52	7.93	0.683	4.877	0.8755	Medium	7.52	7.93	0.642	4.589	0.8621	Medium	7.52	7.93	1.34	9.575	0.8926	Medium	7.52	7.93	1.3	9.283	0.8966	Medium	7.52	7.93	1.251	8.936	0.8751	Medium	7.52	7.93	2.928	20.917	0.8958	Medium	7.52
AZ2	700	713	RSEIAQSRHYQQRF	5.79	4	12	5.77	6.29	0.648	5.399	0.9189	High	5.77	6.29	0.509	4.245	0.9387	High	5.77	6.29	0.511	4.262	0.9207	High	5.77	6.29	1.181	9.842	0.9083	High	5.77	6.29	1.126	9.382	0.934	High	5.77	6.29	0.962	8.013	0.929	High	5.77	6.29	2.569	21.407	0.9236	High	5.77
AZ2	714	719	AVILEA	9.26	1	4	9.19	9.33	0.041	1.024	0.8733	Medium	9.19	9.33	0.026	0.642	0.8481	Medium	9.19	9.33	0.03	0.738	0.8649	Medium	9.19	9.33	0.024	0.594	0.8209	Medium	9.19	9.33	0.028	0.707	0.8997	Medium	9.19	9.33	0.041	1.018	0.8869	Medium	9.19	9.33	0.024	0.595	0.7874	Medium	9.19
AZ2	720	729	YLRGCGTAML	9.99	2	8	10.04	10.1	0.228	2.856	0.898	Medium	10.04	10.1	0.187	2.337	0.9132	Medium	10.04	10.09	0.189	2.358	0.9142	Medium	10.04	10.1	0.615	7.688	0.9127	Medium	10.04	10.1	0.585	7.31	0.883	Medium	10.04	10.1	0.619	7.737	0.873	Medium	10.04	10.09	1.462	18.271	0.8818	Medium	10.04
AZ2	729	737	LHDFTQQVQ	7.59	2	7	7.46	7.65	0.106	1.512	0.8305	Medium	7.46	7.65	0.225	3.216	0.8397	Medium	7.46	7.65	0.097	1.381	0.8561	Medium	7.46	7.65	0.107	1.528	0.8572	Medium	7.46	7.65	0.114	1.633	0.8595	Medium	7.46	7.65	0.111	1.581	0.8465	Medium	7.46	7.65	0.131	1.872	0.8483	Medium	7.46
AZ2	732	737	FTQQVQ	5.63	1	4	5.54	5.61	0.157	3.937	0.7594	Medium	5.57	5.69	0.126	3.156	0.8428	Medium	5.57	5.68	0.147	3.687	0.8729	Medium	5.57	5.69	0.068	1.701	0.8771	Medium	5.57	5.69	0.035	0.876	0.8745	Medium	5.57	5.69	0.115	2.868	0.8521	Medium	5.57	5.69	0.079	1.968	0.8668	Medium	5.57
AZ2	732	738	FTQQVQV	8.12	1	5	8.18	8.26	0.083	1.661	0.7332	Medium	8.17	8.26	0.084	1.689	0.8988	Medium	8.17	8.25	0.199	3.988	0.869	Medium	8.17	8.26	0.114	2.28	0.832	Medium	8.26	8.33	0.153	3.068	0.7946	Medium	8.27	8.35	0.139	2.785	0.8483	Medium	8.22	8.3	0.233	4.67	0.7188	Medium	8.17
AZ2	742	747	LQKVTL	8.23	1	4	8.2	8.33	0.859	21.479	0.9288	Medium	8.2	8.33	0.838	20.943	0.9469	Medium	8.2	8.33	0.724	18.106	0.9352	Medium	8.2	8.33	1.777	44.423	0.9407	Medium	8.2	8.33	1.721	43.036	0.9532	Medium	8.2	8.33	1.745	43.615	0.926	Medium	8.2	8.33	2.832	70.806	0.9401	Medium	8.2
AZ2	748	761	DIKSLSAEKYDVSS	8	2	12	7.87	8.2	9.738	81.15	0.8685	Medium	7.87	8.2	9.523	79.36	0.9201	High	7.87	8.2	9.43	78.587	0.919	High	7.87	8.2	9.6	80.001	0.9011	High	7.87	8.2	9.695	80.79	0.8702	Medium	7.87	8.2	10.002	83.346	0.8894	Medium	7.87	8.2	9.79	81.579	0.8841	High	7.87
AZ2	748	767	DIKSLSAEKYDVSSQVISQL	11.14	3	18	10.95	11.35	13.992	77.732	0.8484	Medium	10.94	11.35	14.091	78.286	0.886	Medium	10.94	11.35	13.777	76.542	0.8998	Medium	10.94	11.35	14.266	79.256	0.8662	Medium	10.94	11.35	14.319	79.55	0.8772	Medium	10.94	11.35	14.399	79.992	0.8753	Medium	10.94	11.34	14.341	79.67	0.8437	Medium	10.94
AZ2	748	782	DIKSLSAEKYDVSSQVISQLKQKLENLQNSQLPES	12.49	5	32	12.24	12.76	20.533	64.165	0.8756	Medium	12.24	12.76	20.993	65.604	0.8751	High	12.32	12.45	20.134	62.92	0.9003	High	12.24	12.76	24.917	77.867	0.9057	High	12.24	12.76	24.685	77.14	0.8909	High	12.24	12.76	25.009	78.152	0.8546	Medium	12.23	12.75	25.771	80.534	0.8704	High	12.23
AZ2	755	782	EKYDVSSQVISQLKQKLENLQNSQLPES	12.1	3	25	12.12	12.21	15.182	60.728	0.7739	Medium	12.12	12.21	14.965	59.862	0.841	Medium	12.04	12.13	14.664	58.657	0.8122	Medium	12.12	12.21	19.63	78.521	0.8287	Medium	12.12	12.21	19.552	78.208	0.8569	Medium	12.12	12.21	19.572	78.288	0.7947	Medium	12.12	12.21	20.374	81.495	0.8373	Medium	12.12
AZ2	762	782	QVISQLKQKLENLQNSQLPES	10.6	2	18	10.42	10.74	10.738	59.657	0.8421	Medium	10.42	10.73	10.825	60.14	0.9221	Medium	10.41	10.73	10.202	56.68	0.9104	Medium	10.41	10.73	15.149	84.164	0.8627	Medium	10.42	10.73	15.1	83.886	0.863	Medium	10.42	10.73	15.244	84.69	0.8578	Medium	10.41	10.73	16.115	89.529	0.7987	Medium	10.41
AZ2	767	782	LKQKLENLQNSQLPES	7.51	2	13	7.36	7.61	6.708	51.6	0.8216	Medium	7.36	7.61	6.284	48.336	0.8966	Medium	7.36	7.61	6.022	46.324	0.9051	Medium	7.36	7.61	9.385	72.193	0.8858	Medium	7.36	7.61	9.405	72.345	0.8555	Medium	7.36	7.61	9.416	72.431	0.8492	Medium	7.36	7.61	10.336	79.508	0.868	Medium	7.36
AZ2	768	782	KQKLENLQNSQLPES	7.13	2	12	6.97	7.45	5.955	49.626	0.9385	High	6.97	7.45	5.907	49.228	0.9536	High	7.01	7.11	5.803	48.355	0.9326	High	6.96	7.45	8.696	72.463	0.9452	High	6.96	7.45	8.563	71.356	0.9363	High	6.96	7.45	8.635	71.956	0.9264	High	6.96	7.45	9.531	79.425	0.9405	High	6.96
AZ2	783	796	FRVPYDPGLKAGAL	10.16	3	10	10.22	10.31	0.308	3.08	0.8989	High	10.22	10.31	0.317	3.166	0.9078	High	10.22	10.3	0.297	2.971	0.9074	High	10.22	10.31	0.507	5.068	0.9083	High	10.22	10.31	0.489	4.885	0.8989	High	10.22	10.31	0.501	5.013	0.902	High	10.22	10.3	1.781	17.815	0.9158	High	10.22
AZ2	797	812	AIEKCKVMASKKKPLW	6.81	4	13	6.98	7.07	2.564	19.726	0.9116	Medium	6.98	7.07	2.186	16.816	0.9462	Medium	6.98	7.06	2.155	16.573	0.9442	Medium	6.98	7.07	3.352	25.787	0.8983	Medium	6.98	7.07	3.211	24.703	0.9283	Medium	6.98	7.07	2.785	21.427	0.9487	Medium	6.98	7.06	4.699	36.143	0.8867	Medium	6.98
AZ2	797	815	AIEKCKVMASKKKPLWLEF	10.45	2	16	10.29	10.72	2.293	14.328	0.8677	Medium	10.29	10.72	1.53	9.563	0.9287	Medium	10.29	10.72	1.491	9.316	0.9108	Medium	10.29	10.72	3.1	19.377	0.8733	Medium	10.31	10.72	2.756	17.223	0.872	Medium	10.31	10.72	2.09	13.065	0.8943	Medium	10.29	10.71	4.485	28.033	0.8541	Medium	10.29
AZ2	802	815	KVMASKKKPLWLEF	10.71	4	11	10.86	10.95	1.208	10.985	0.8822	Medium	10.86	10.94	0.982	8.924	0.8996	Medium	10.75	10.82	0.919	8.353	0.8129	Medium	10.76	10.85	1.651	15.011	0.8741	Medium	10.93	11	1.47	13.361	0.847	Medium	10.73	10.82	1.348	12.259	0.7206	Medium	10.71	10.81	1.954	17.764	0.7769	Medium	10.78
AZ2	816	823	KCADPTAL	7.06	1	5	6.88	7.18	1.518	30.356	0.8781	Medium	6.88	7.18	1.498	29.965	0.9005	Medium	6.88	7.17	1.363	27.263	0.9115	Medium	6.88	7.17	3.025	60.505	0.8864	Medium	6.88	7.17	2.994	59.875	0.8911	Medium	6.88	7.17	2.912	58.238	0.8812	Medium	6.88	7.17	3.75	75.003	0.8597	Medium	6.88
AZ2	816	825	KCADPTALSN	5.74	2	7	5.69	5.78	2.981	42.579	0.9122	Medium	5.69	5.78	3.024	43.193	0.93	Medium	5.68	5.78	2.858	40.825	0.9218	Medium	5.69	5.78	4.595	65.65	0.922	Medium	5.69	5.78	4.655	66.502	0.9217	Medium	5.69	5.78	4.598	65.693	0.888	Medium	5.69	5.78	5.342	76.321	0.9029	Medium	5.69
AZ2	816	829	KCADPTALSNETIG	8.17	2	11	8.02	8.43	4.336	39.416	0.8317	Medium	8.01	8.43	4.313	39.206	0.8936	Medium	8.01	8.42	4.168	37.893	0.8839	Medium	8.01	8.43	6.348	57.713	0.8738	Medium	8.01	8.43	6.27	56.996	0.8553	Medium	8.01	8.43	6.254	56.858	0.8632	Medium	8.01	8.42	7.587	68.974	0.8069	Medium	8.01
AZ2	816	842	KCADPTALSNETIGIIFKHGDDLRQDM	11.89	5	24	12.01	12.08	4.566	19.026	0.8913	High	12.01	12.08	4.756	19.817	0.8977	High	12.01	12.08	4.351	18.127	0.9103	High	12.01	12.08	7.824	32.598	0.8617	Medium	12.01	12.08	7.846	32.692	0.8838	High	12.01	12.08	7.824	32.599	0.8562	High	11.92	11.99	9.522	39.676	0.8575	Medium	12.01
AZ2	824	829	SNETIG	5.53	1	4	5.54	5.62	1.436	35.89	0.7776	Medium	5.54	5.62	1.441	36.019	0.8115	Medium	5.53	5.62	1.414	35.341	0.8362	Medium	5.54	5.62	2.038	50.939	0.8547	Medium	5.6	5.67	2.06	51.507	0.8678	Medium	5.6	5.68	2.001	50.016	0.8632	Medium	5.54	5.6	2.386	59.641	0.8317	Medium	5.54
AZ2	824	842	SNETIGIIFKHGDDLRQDM	10.75	4	17	10.86	10.95	1.393	8.192	0.8666	Medium	10.86	10.94	1.385	8.149	0.908	Medium	10.86	10.94	1.185	6.971	0.9023	Medium	10.86	10.94	3.491	20.533	0.8087	Medium	10.86	10.94	3.364	19.789	0.876	Medium	10.86	10.94	3.238	19.049	0.8929	Medium	10.86	10.94	4.183	24.607	0.7932	Medium	10.86
AZ2	844	848	ILQIL	12.17	1	3	12.21	12.29	0.019	0.635	0.9362	Medium	12.2	12.29	-0.004	-0.127	0.9116	Medium	12.2	12.29	0.029	0.967	0.9309	Medium	12.2	12.29	0.003	0.087	0.9592	Medium	12.2	12.29	0.029	0.957	0.9367	Medium	12.2	12.29	0.005	0.156	0.8814	Medium	12.2	12.28	0.027	0.893	0.9167	Medium	12.2
AZ2	849	855	RIMESIW	11.65	2	5	11.6	11.68	0.062	1.233	0.7863	Medium	11.6	11.68	0.038	0.767	0.8124	Medium	11.6	11.68	0.044	0.874	0.8421	Medium	11.6	11.68	0.07	1.391	0.8275	Medium	11.6	11.68	0.106	2.111	0.7861	Medium	11.6	11.68	0.14	2.805	0.6836	Medium	11.6	11.68	0.069	1.38	0.8003	Medium	11.63
AZ2	849	862	RIMESIWETESLDL	13.25	2	12	13.18	13.4	0.685	5.706	0.8295	Medium	13.18	13.39	0.728	6.065	0.8864	Medium	13.18	13.4	0.629	5.244	0.9011	Medium	13.18	13.39	1.093	9.112	0.8553	Medium	13.18	13.39	1.062	8.851	0.8053	Medium	13.18	13.39	1.04	8.669	0.8671	Medium	13.17	13.39	2.408	20.067	0.8115	Medium	13.17
AZ2	853	862	SIWETESLDL	13.27	2	8	13.36	13.42	0.615	7.689	0.8309	Medium	13.36	13.42	0.566	7.069	0.8611	Medium	13.36	13.42	0.522	6.523	0.9062	Medium	13.36	13.42	0.971	12.142	0.8492	Medium	13.36	13.42	1.015	12.693	0.8474	Medium	13.36	13.42	0.887	11.084	0.8832	Medium	13.36	13.42	2.267	28.339	0.8323	Medium	13.36
AZ2	862	878	LCLLPYGCISTGDKIGM	13.06	3	14	13.04	13.1	0.219	1.567	0.6802	Medium	12.97	13.06	0.331	2.365	0.8447	Medium	12.97	13.06	0.291	2.076	0.8215	Medium	12.97	13.06	0.918	6.557	0.7824	Medium	12.97	13.06	0.841	6.004	0.6339	Medium	12.97	13.06	0.752	5.372	0.7086	Medium	12.96	13.06	2.388	17.06	0.7381	Medium	13.03
AZ2	863	869	CLLPYGC	11.86	1	4	11.78	11.87	0.174	4.346	0.8505	Medium	11.78	11.87	0.163	4.073	0.8247	Medium	11.77	11.87	0.155	3.867	0.8165	Medium	11.77	11.87	0.473	11.835	0.8719	Medium	11.78	11.87	0.514	12.848	0.7889	Medium	11.78	11.87	0.474	11.838	0.7122	Medium	11.77	11.86	0.965	24.135	0.7868	Medium	11.77
AZ2	863	878	CLLPYGCISTGDKIGM	12.04	2	13	11.9	12.48	0.555	4.269	0.9292	Medium	11.9	12.48	0.527	4.051	0.911	Medium	11.9	12.48	0.512	3.94	0.9209	Medium	11.9	12.48	1.261	9.701	0.9085	Medium	11.9	12.48	1.153	8.868	0.913	Medium	11.9	12.48	1.115	8.577	0.9305	Medium	11.9	12.48	2.822	21.711	0.904	Medium	11.9
AZ2	863	880	CLLPYGCISTGDKIGMIE	12.38	2	15	12.4	12.49	0.429	2.86	0.9135	High	12.4	12.49	0.46	3.068	0.9053	High	12.4	12.49	0.422	2.816	0.911	High	12.39	12.49	1.093	7.287	0.9112	High	12.4	12.49	1.039	6.924	0.8712	Medium	12.4	12.49	1.021	6.806	0.9259	High	12.39	12.49	2.51	16.734	0.8525	Medium	12.39
AZ2	865	878	LPYGCISTGDKIGM	10.57	2	12	10.35	10.73	0.542	4.517	0.7046	Medium	10.35	10.73	0.524	4.365	0.7472	Medium	10.35	10.72	0.483	4.021	0.7288	Medium	10.35	10.72	1.158	9.649	0.6892	Medium	10.35	10.73	1.116	9.301	0.7111	Medium	10.35	10.73	1.08	8.999	0.747	Medium	10.35	10.72	2.682	22.352	0.6877	Medium	10.35
AZ2	879	887	IEIVKDATT	7.08	1	7	7.02	7.39	2.123	30.33	0.9291	Medium	7.02	7.39	2.123	30.324	0.9348	High	7.02	7.39	2.07	29.577	0.9085	Medium	7.02	7.39	2.394	34.194	0.9352	Medium	7.02	7.39	2.385	34.066	0.932	Medium	7.02	7.39	2.376	33.938	0.9251	Medium	7.02	7.39	2.78	39.72	0.9058	Medium	7.02
AZ2	879	889	IEIVKDATTIA	9.23	1	9	9.03	9.3	2.46	27.334	0.8874	Medium	9.03	9.3	2.273	25.252	0.8224	Medium	9.03	9.3	2.337	25.961	0.8865	Medium	9.03	9.3	3.144	34.932	0.8847	Medium	9.03	9.3	3.091	34.346	0.8818	Medium	9.03	9.3	3.203	35.586	0.8598	Medium	9.03	9.3	4.182	46.462	0.8865	Medium	9.03
AZ2	881	901	IVKDATTIAKIQQSTVGNTGA	8.37	3	19	8.26	8.55	9.199	48.418	0.8055	Medium	8.26	8.55	8.973	47.229	0.8961	Medium	8.25	8.55	8.701	45.797	0.8643	Medium	8.26	8.55	10.707	56.353	0.8607	Medium	8.26	8.55	10.607	55.827	0.8203	Medium	8.26	8.55	10.784	56.758	0.8419	Medium	8.26	8.55	12.841	67.582	0.8165	Medium	8.26
AZ2	888	902	IAKIQQSTVGNTGAF	8.64	2	13	8.54	8.62	8.488	65.296	0.8266	Medium	8.54	8.62	8.477	65.208	0.8281	Medium	8.53	8.62	8.3	63.847	0.8614	Medium	8.53	8.62	9.396	72.277	0.8792	Medium	8.54	8.62	9.311	71.624	0.8019	Medium	8.59	8.66	9.574	73.643	0.8467	Medium	8.53	8.62	10.478	80.603	0.8567	Medium	8.53
AZ2	888	907	IAKIQQSTVGNTGAFKDEVL	9.51	3	18	9.72	9.8	9.556	53.089	0.7384	Medium	9.64	9.71	9.504	52.799	0.8492	Medium	9.51	9.58	9.284	51.576	0.8753	Medium	9.55	9.62	11.398	63.322	0.8448	Medium	9.55	9.62	11.489	63.827	0.8082	Medium	9.59	9.67	11.311	62.837	0.8719	Medium	9.55	9.62	12.795	71.081	0.838	Medium	9.55
AZ2	902	910	FKDEVLNHW	10.1	3	7	9.96	10.28	1.191	17.013	0.8913	Medium	9.96	10.28	1.194	17.052	0.9005	Medium	9.96	10.28	1.011	14.448	0.9127	Medium	9.96	10.28	2.094	29.907	0.887	Medium	9.96	10.28	1.942	27.747	0.8694	Medium	9.96	10.28	2.042	29.167	0.9039	Medium	9.96	10.28	2.868	40.972	0.8821	Medium	9.96
AZ2	902	924	FKDEVLNHWLKEKSPTEEKFQAA	9.54	4	20	9.4	9.79	2.881	14.404	0.8158	Medium	9.4	9.79	2.613	13.067	0.8587	Medium	9.4	9.78	2.431	12.157	0.8814	Medium	9.4	9.78	5.743	28.715	0.8487	Medium	9.4	9.79	5.327	26.633	0.8443	Medium	9.4	9.79	5.27	26.352	0.8688	Medium	9.4	9.78	10.704	53.518	0.8075	Medium	9.4
AZ2	908	924	NHWLKEKSPTEEKFQAA	7.08	3	14	7.02	7.23	1.752	12.517	0.7958	Medium	7.02	7.23	1.948	13.914	0.8074	Medium	7.01	7.23	1.676	11.974	0.8593	Medium	7.01	7.23	3.476	24.827	0.8372	Medium	7.02	7.23	3.305	23.606	0.8388	Medium	7.01	7.23	3.229	23.063	0.8243	Medium	7.01	7.23	7.299	52.135	0.8274	Medium	7.01
AZ2	925	934	VERFVYSCAG	9.08	1	8	9.11	9.17	0.172	2.154	0.8371	Medium	9.11	9.17	0.098	1.221	0.8751	High	9.1	9.17	0.103	1.289	0.8988	High	9.1	9.17	0.14	1.751	0.8986	High	9.11	9.17	0.216	2.701	0.8614	High	9.11	9.17	0.146	1.831	0.8348	Medium	9.1	9.17	0.178	2.229	0.879	Medium	9.1
AZ2	927	934	RFVYSCAG	8.29	1	6	8.29	8.36	0.175	2.911	0.8028	Medium	8.29	8.36	0.066	1.094	0.9018	High	8.29	8.36	0.125	2.076	0.9004	High	8.29	8.36	0.084	1.394	0.8625	Medium	8.29	8.36	0.104	1.735	0.7972	Medium	8.29	8.36	0.183	3.046	0.7706	Medium	8.29	8.36	0.105	1.755	0.8151	Medium	8.29
AZ2	935	939	YCVAT	6.8	1	3	6.82	6.92	0.018	0.6	0.9281	Medium	6.82	6.92	0.007	0.225	0.9063	Medium	6.82	6.91	0.033	1.103	0.9198	Medium	6.82	6.91	0.021	0.704	0.9221	High	6.82	6.91	0.023	0.75	0.9273	Medium	6.82	6.91	0.039	1.296	0.8698	Medium	6.82	6.91	0.037	1.222	0.9388	High	6.82
AZ2	940	953	FVLGIGDRHNDNIM	10.54	3	12	10.61	10.7	0.495	4.125	0.9289	High	10.61	10.7	0.413	3.442	0.9097	High	10.61	10.7	0.385	3.206	0.9158	High	10.61	10.7	1.164	9.703	0.9305	High	10.61	10.7	1.124	9.364	0.9099	Medium	10.61	10.7	1.139	9.488	0.9087	Medium	10.61	10.7	2.195	18.291	0.9212	High	10.61
AZ2	954	960	ITETGNL	7.56	1	5	7.71	7.8	0.334	6.681	0.8874	Medium	7.7	7.8	0.281	5.612	0.9276	Medium	7.7	7.79	0.253	5.065	0.917	Medium	7.7	7.8	0.805	16.102	0.9003	Medium	7.7	7.8	0.763	15.264	0.9177	Medium	7.7	7.8	0.774	15.481	0.9198	Medium	7.64	7.71	1.417	28.341	0.9151	Medium	7.7
AZ2	954	961	ITETGNLF	11.33	1	6	11.19	11.28	0.419	6.988	0.8655	Medium	11.19	11.28	0.408	6.806	0.8056	Medium	11.19	11.28	0.391	6.52	0.8525	Medium	11.19	11.28	0.79	13.163	0.9006	Medium	11.19	11.28	0.824	13.733	0.7658	Medium	11.19	11.28	0.934	15.562	0.6581	Medium	11.18	11.28	1.272	21.206	0.8829	Medium	11.19
AZ2	954	975	ITETGNLFHIDFGHILGNYKSF	13.27	3	20	13.23	13.31	5.801	29.003	0.8164	Medium	13.23	13.31	5.984	29.921	0.8194	Medium	13.23	13.31	5.747	28.733	0.8412	Medium	13.23	13.31	6.941	34.707	0.8398	Medium	13.23	13.31	7.152	35.758	0.765	Medium	13.23	13.31	7.061	35.305	0.7686	Medium	13.22	13.31	7.476	37.379	0.8361	Medium	13.22
AZ2	954	976	ITETGNLFHIDFGHILGNYKSFL	13.82	4	21	13.73	14.04	6.763	32.204	0.7743	Medium	13.73	14.05	7.235	34.451	0.7348	Medium	13.73	14.05	6.798	32.371	0.7482	Medium	13.73	14.05	8.045	38.31	0.8179	Medium	13.73	14.05	7.702	36.675	0.7235	Medium	13.73	14.05	8.199	39.045	0.6924	Medium	13.73	14.05	8.644	41.163	0.8071	Medium	13.73
AZ2	954	992	ITETGNLFHIDFGHILGNYKSFLGINKERVPFVLTPDFL	13.93	5	35	13.93	14.03	14.531	41.517	0.8628	Medium	13.89	13.96	14.366	41.045	0.7832	Medium	13.86	13.93	13.729	39.227	0.7861	Medium	13.94	14.04	15.534	44.383	0.8573	High	13.94	14.04	15.642	44.692	0.8136	Medium	13.94	14.04	15.117	43.193	0.7919	Medium	13.94	14.04	17.257	49.305	0.8374	Medium	13.94
AZ2	961	972	FHIDFGHILGNY	12.72	3	10	12.54	12.98	3.903	39.028	0.8683	Medium	12.54	12.97	3.767	37.665	0.9353	Medium	12.54	12.98	3.614	36.143	0.9049	Medium	12.54	12.97	4.875	48.752	0.8879	Medium	12.54	12.97	4.849	48.494	0.8872	Medium	12.54	12.98	4.595	45.954	0.886	Medium	12.54	12.97	4.998	49.982	0.864	Medium	12.54
AZ2	961	975	FHIDFGHILGNYKSF	12.39	4	13	12.33	12.51	5.887	45.285	0.822	Medium	12.33	12.5	5.96	45.842	0.9085	Medium	12.36	12.43	5.787	44.519	0.8903	Medium	12.33	12.5	6.96	53.536	0.8799	High	12.33	12.5	6.87	52.848	0.8129	Medium	12.33	12.51	6.701	51.543	0.8833	Medium	12.29	12.37	7.207	55.436	0.7819	Medium	12.49
AZ2	961	976	FHIDFGHILGNYKSFL	13.36	4	14	13.2	13.62	6.893	49.236	0.71	Medium	13.2	13.62	6.945	49.607	0.8758	Medium	13.2	13.62	6.644	47.456	0.8543	Medium	13.2	13.62	7.716	55.112	0.7734	Medium	13.2	13.62	7.772	55.517	0.7897	Medium	13.2	13.62	7.562	54.013	0.8108	Medium	13.2	13.62	6.773	48.378	0.7348	Medium	13.2
AZ2	961	992	FHIDFGHILGNYKSFLGINKERVPFVLTPDFL	13.78	5	28	13.77	13.83	13.916	49.701	0.7865	Medium	13.7	13.77	13.832	49.4	0.6075	Medium	13.75	13.82	13.435	47.983	0.7338	Medium	13.72	13.8	15.707	56.095	0.8028	Medium	13.72	13.8	15.448	55.171	0.6764	Medium	13.76	13.82	15.032	53.687	0.6948	Medium	13.72	13.8	17.037	60.847	0.7832	Medium	13.72
AZ2	962	975	HIDFGHILGNYKSF	11.38	3	12	11.31	11.39	6.305	52.542	0.7894	Medium	11.31	11.39	6.233	51.939	0.8589	Medium	11.3	11.39	6.008	50.065	0.87	Medium	11.3	11.39	7.316	60.97	0.8238	Medium	11.31	11.39	7.315	60.962	0.8221	Medium	11.31	11.39	7.175	59.791	0.8342	Medium	11.3	11.39	7.298	60.82	0.7965	Medium	11.3
AZ2	973	992	KSFLGINKERVPFVLTPDFL	12.87	4	16	12.79	12.87	9.169	57.306	0.8021	Medium	12.79	12.87	7.997	49.983	0.8829	Medium	12.79	12.87	7.683	48.021	0.8857	Medium	12.79	12.86	9.688	60.552	0.8591	Medium	12.79	12.87	9.263	57.897	0.8609	High	12.79	12.87	8.521	53.257	0.8695	High	12.79	12.86	10.421	65.13	0.877	Medium	12.79
AZ2	976	992	LGINKERVPFVLTPDFL	13.06	3	13	13.24	13.31	7.212	55.476	0.9204	High	13.23	13.31	7.03	54.076	0.9369	High	13.07	13.14	6.819	52.453	0.913	High	13.21	13.28	7.746	59.581	0.9367	High	13.14	13.32	7.522	57.864	0.9146	High	12.93	13.48	7.374	56.727	0.9356	High	12.93	13.48	8.617	66.287	0.9414	High	12.93
AZ2	977	992	GINKERVPFVLTPDFL	12.98	3	12	12.75	13.2	7.273	60.604	0.7985	Medium	12.75	13.2	6.507	54.221	0.9236	Medium	12.75	13.2	5.983	49.858	0.9142	Medium	12.75	13.2	7.383	61.527	0.8576	Medium	12.75	13.2	6.68	55.663	0.9087	Medium	12.75	13.2	7.162	59.68	0.8438	Medium	12.75	13.2	7.993	66.611	0.9065	Medium	12.75
AZ2	993	1014	FVMGTSGKKTSPHFQKFQDICV	9.54	2	19	9.4	9.75	3.906	20.56	0.8294	Medium	9.4	9.75	2.692	14.17	0.9082	Medium	9.4	9.75	2.374	12.496	0.9105	Medium	9.4	9.75	4.884	25.706	0.8628	Medium	9.4	9.75	4.443	23.383	0.8568	Medium	9.4	9.75	3.655	19.235	0.8623	Medium	9.4	9.75	6.435	33.869	0.8455	Medium	9.4
AZ2	1015	1026	KAYLALRHHTNL	6.32	2	10	6.3	6.55	0.256	2.563	0.8335	Medium	6.3	6.55	0.241	2.41	0.9059	Medium	6.3	6.54	0.201	2.007	0.9126	Medium	6.3	6.54	0.34	3.402	0.8704	Medium	6.3	6.54	0.367	3.673	0.8457	Medium	6.3	6.54	0.301	3.014	0.8811	Medium	6.3	6.54	0.747	7.471	0.8478	Medium	6.3
AZ2	1015	1027	KAYLALRHHTNLL	7.62	4	11	7.75	7.81	0.137	1.249	0.7728	Medium	7.75	7.81	0.065	0.591	0.8794	Medium	7.74	7.81	0.091	0.83	0.8624	Medium	7.75	7.81	0.257	2.333	0.8674	Medium	7.75	7.81	0.259	2.351	0.8007	Medium	7.75	7.81	0.142	1.289	0.8679	Medium	7.74	7.81	0.804	7.313	0.8104	Medium	7.74
AZ2	1017	1026	YLALRHHTNL	6.64	3	8	6.79	6.86	0.359	4.485	0.9077	Medium	6.79	6.86	0.245	3.061	0.9263	Medium	6.78	6.85	0.21	2.619	0.9321	Medium	6.79	6.86	0.314	3.923	0.9324	Medium	6.79	6.86	0.347	4.332	0.9264	Medium	6.79	6.86	0.302	3.77	0.9402	Medium	6.79	6.85	0.728	9.105	0.8938	Medium	6.79
AZ2	1017	1027	YLALRHHTNLL	8.29	2	9	8.2	8.37	0.216	2.406	0.7722	Medium	8.2	8.37	0.148	1.649	0.7513	Medium	8.2	8.36	0.108	1.202	0.7551	Medium	8.2	8.37	0.226	2.511	0.8428	Medium	8.2	8.37	0.225	2.505	0.7931	Medium	8.2	8.37	0.134	1.491	0.7011	Medium	8.2	8.37	0.593	6.594	0.7485	Medium	8.2
AZ2	1019	1026	ALRHHTNL	4.09	2	6	4.19	4.26	0.3	5.004	0.8907	Medium	4.19	4.26	0.33	5.493	0.8992	Medium	4.2	4.26	0.293	4.884	0.9131	Medium	4.19	4.26	0.385	6.421	0.9136	Medium	4.19	4.26	0.408	6.805	0.9044	Medium	4.19	4.26	0.398	6.631	0.8566	Medium	4.19	4.26	0.721	12.012	0.9206	Medium	4.19
AZ2	1019	1027	ALRHHTNLL	6.22	2	7	6.26	6.44	0.234	3.349	0.8951	Medium	6.26	6.44	0.17	2.426	0.8821	Medium	6.26	6.43	0.159	2.274	0.9009	Medium	6.26	6.44	0.221	3.162	0.9148	Medium	6.26	6.44	0.222	3.168	0.9168	Medium	6.26	6.43	0.311	4.449	0.8974	Medium	6.26	6.43	0.645	9.212	0.8787	Medium	6.26
AZ2	1031	1035	FSMML	13.4	1	3	13.29	13.51	0.015	0.488	0.9067	Medium	13.29	13.5	0.024	0.81	0.8984	Medium	13.29	13.5	0.008	0.256	0.8868	Medium	13.28	13.5	0.028	0.947	0.9077	Medium	13.29	13.5	0.029	0.97	0.9059	Medium	13.29	13.5	0.024	0.816	0.8916	Medium	13.28	13.5	0.047	1.566	0.9041	Medium	13.28
AZ2	1035	1042	LMTGMPQL	11.7	2	5	11.69	11.76	2.264	45.274	0.794	Medium	11.76	11.83	2.347	46.93	0.9103	Medium	11.69	11.76	2.352	47.048	0.8424	Medium	11.69	11.76	3.054	61.079	0.8005	Medium	11.69	11.76	3.059	61.185	0.7636	Medium	11.77	11.84	3.15	62.996	0.7588	Medium	11.69	11.76	3.461	69.216	0.7878	Medium	11.69
AZ2	1035	1050	LMTGMPQLTSKEDIEY	10.99	2	13	10.75	11.14	5.688	43.757	0.8195	Medium	10.75	11.14	5.401	41.543	0.876	Medium	10.75	11.14	5.08	39.074	0.8616	Medium	10.75	11.14	7.599	58.455	0.8481	Medium	10.75	11.14	7.406	56.972	0.8457	Medium	10.75	11.14	6.805	52.348	0.8538	Medium	10.75	11.13	9.548	73.449	0.8761	Medium	10.75
AZ2	1036	1042	MTGMPQL	11.2	1	4	10.87	11.12	2.727	68.174	0.8068	Medium	10.87	11.12	2.585	64.63	0.803	Medium	10.87	11.12	2.511	62.775	0.817	Medium	10.87	11.12	3.188	79.701	0.8167	Medium	10.87	11.12	3.252	81.301	0.8282	Medium	10.87	11.12	3.109	77.725	0.7807	Medium	10.87	11.12	3.145	78.622	0.807	Medium	10.87
AZ2	1050	1071	YIRDALTVGKNEEDAKKYFLDQ	9.72	4	20	9.77	9.87	2.631	13.156	0.9227	High	9.77	9.87	2.515	12.575	0.9286	High	9.77	9.87	2.506	12.531	0.9342	High	9.77	9.87	3.257	16.283	0.9147	High	9.77	9.87	3.282	16.408	0.9035	High	9.77	9.87	3.196	15.982	0.9115	High	9.84	9.91	4.71	23.55	0.8203	Medium	9.77
AZ2	1051	1069	IRDALTVGKNEEDAKKYFL	9.61	5	17	9.46	9.75	2.283	13.432	0.8469	Medium	9.46	9.74	2.101	12.359	0.8711	Medium	9.46	9.74	2.061	12.122	0.8969	Medium	9.46	9.74	3.02	17.763	0.8516	Medium	9.46	9.74	2.636	15.507	0.8529	Medium	9.46	9.74	2.645	15.561	0.8779	Medium	9.46	9.74	4.25	24.999	0.798	Medium	9.46
AZ2	1051	1071	IRDALTVGKNEEDAKKYFLDQ	9.5	3	19	9.27	9.72	2.626	13.82	0.8904	Medium	9.27	9.72	2.482	13.065	0.9127	High	9.26	9.72	2.402	12.641	0.9118	High	9.26	9.72	3.415	17.975	0.9044	High	9.27	9.72	3.362	17.693	0.8976	High	9.27	9.72	3.105	16.342	0.903	High	9.26	9.72	5.336	28.082	0.8661	Medium	9.26
AZ2	1051	1073	IRDALTVGKNEEDAKKYFLDQIE	10.45	4	21	10.22	10.62	2.522	12.009	0.8237	Medium	10.22	10.62	2.491	11.861	0.8487	Medium	10.22	10.62	2.358	11.226	0.864	Medium	10.22	10.62	3.238	15.419	0.8439	Medium	10.22	10.62	3.261	15.528	0.8413	Medium	10.22	10.62	3.323	15.823	0.8487	Medium	10.22	10.61	6.357	30.271	0.7892	Medium	10.22
AZ2	1072	1084	IEVCRDKGWTVQF	11.18	3	11	11.17	11.24	2.749	24.995	0.8958	High	11.09	11.16	2.538	23.068	0.8868	High	11.09	11.16	2.373	21.577	0.8823	High	11.24	11.32	5.464	49.669	0.8369	Medium	11.31	11.39	5.375	48.868	0.9284	High	11.04	11.1	5.346	48.604	0.7208	Medium	11.22	11.29	7.304	66.397	0.9143	Medium	11.29
AZ2	1088	1092	LHLVL	11.09	2	3	10.94	11	0.336	11.196	0.8817	Medium	10.94	11	0.357	11.888	0.9301	Medium	10.93	11	0.366	12.212	0.9141	Medium	10.93	11	0.633	21.086	0.8973	Medium	10.99	11.08	0.592	19.739	0.8046	Medium	10.94	11	0.605	20.158	0.8925	Medium	11	11.07	0.828	27.604	0.8016	Medium	10.95
AS-604850	6	12	YKQPVVL	8.77	1	4	8.68	8.89	3.667	91.673	0.9019	Medium	8.68	8.88	3.687	92.168	0.8983	Medium	8.68	8.89	3.751	93.779	0.9078	Medium	8.68	8.89	3.737	93.433	0.9111	Medium	8.67	8.88	3.727	93.182	0.9125	Medium	8.68	8.89	3.762	94.051	0.9146	Medium	8.68	8.89	3.692	92.303	0.9096	Medium	8.67
AS-604850	36	41	ELIPIE	10.59	1	3	10.64	10.73	0.07	2.321	0.8966	Medium	10.64	10.73	0.043	1.441	0.9102	Medium	10.64	10.74	0.045	1.51	0.9047	Medium	10.64	10.73	0.066	2.187	0.9074	Medium	10.64	10.73	0.053	1.772	0.9143	Medium	10.64	10.74	0.072	2.411	0.9141	Medium	10.64	10.73	0.243	8.096	0.905	Medium	10.64
AS-604850	36	42	ELIPIEF	13.88	1	4	13.86	13.95	0.091	2.285	0.7942	Medium	13.97	13.99	0.139	3.472	0.737	Medium	13.96	14.02	0.044	1.11	0.7809	Medium	13.86	13.96	0.198	4.962	0.8011	Medium	13.96	14.04	0.264	6.612	0.7708	Medium	13.92	13.99	0.179	4.485	0.7802	Medium	13.86	13.95	0.327	8.167	0.8467	Medium	13.86
AS-604850	42	58	FVLPTSQRKCKSPETAL	8.48	3	13	8.47	8.55	4.714	36.261	0.9265	High	8.28	8.41	4.553	35.021	0.8999	High	8.09	8.77	4.505	34.652	0.9143	High	8.51	8.62	5.7	43.847	0.9144	High	8.09	8.76	5.59	42.999	0.9218	High	8.09	8.77	5.558	42.757	0.9178	High	8.09	8.77	6.727	51.744	0.9272	High	8.09
AS-604850	42	59	FVLPTSQRKCKSPETALL	9.43	3	14	9.25	9.7	4.392	31.371	0.8897	Medium	9.26	9.7	3.917	27.98	0.9293	High	9.26	9.7	3.949	28.207	0.9215	High	9.26	9.7	5.45	38.932	0.9085	Medium	9.25	9.7	5.125	36.608	0.9122	Medium	9.26	9.7	4.937	35.264	0.9077	High	9.26	9.7	6.307	45.05	0.907	Medium	9.25
AS-604850	59	70	LHVAGHGNVEQM	6.54	2	10	6.78	6.86	1.161	11.606	0.8033	Medium	6.78	6.87	1.102	11.019	0.8281	Medium	6.78	6.87	1.017	10.173	0.8692	Medium	6.78	6.87	1.867	18.667	0.8662	Medium	6.78	6.87	1.861	18.605	0.8727	Medium	6.81	6.89	2.009	20.09	0.8596	Medium	6.78	6.86	2.319	23.191	0.8814	Medium	6.78
AS-604850	59	72	LHVAGHGNVEQMKA	5.97	2	12	5.9	6.06	0.624	5.202	0.7325	Medium	5.9	6.06	0.623	5.192	0.869	Medium	5.9	6.06	0.632	5.269	0.8436	Medium	5.9	6.06	1.242	10.349	0.8497	Medium	5.9	6.06	1.374	11.45	0.8496	Medium	5.9	6.06	1.054	8.786	0.885	Medium	5.9	6.06	1.992	16.598	0.9114	Medium	5.9
AS-604850	60	70	HVAGHGNVEQM	5.29	2	9	5.31	5.42	0.489	5.438	0.8911	Medium	5.31	5.42	0.674	7.494	0.9058	High	5.31	5.42	0.654	7.27	0.9113	High	5.31	5.42	1.237	13.739	0.9235	High	5.31	5.42	1.22	13.557	0.9132	High	5.31	5.42	1.211	13.454	0.9349	High	5.31	5.42	1.769	19.659	0.9315	High	5.31
AS-604850	60	74	HVAGHGNVEQMKAQV	5.94	3	13	5.9	6.23	0.715	5.499	0.7301	Medium	5.9	6.24	0.585	4.504	0.824	Medium	5.9	6.24	0.897	6.899	0.7765	Medium	5.9	6.24	1.315	10.112	0.7918	Medium	5.9	6.24	1.336	10.279	0.7783	Medium	5.9	6.23	1.095	8.426	0.7887	Medium	5.9	6.23	1.886	14.506	0.7878	Medium	5.9
AS-604850	60	75	HVAGHGNVEQMKAQVW	8.28	3	14	8.16	8.48	0.442	3.159	0.6397	Medium	8.16	8.49	0.38	2.718	0.8563	Medium	8.16	8.49	0.32	2.283	0.8301	Medium	8.16	8.49	0.911	6.51	0.8013	Medium	8.16	8.48	0.775	5.536	0.8044	Medium	8.16	8.49	0.665	4.75	0.8763	Medium	8.16	8.48	1.44	10.289	0.807	Medium	8.15
AS-604850	71	76	KAQVWL	10.59	2	4	10.64	10.71	0.064	1.601	0.9111	Medium	10.64	10.71	0.046	1.16	0.9524	Medium	10.64	10.71	0.059	1.473	0.9488	Medium	10.64	10.71	0.037	0.931	0.928	Medium	10.64	10.7	0.063	1.58	0.9077	Medium	10.64	10.71	0.071	1.786	0.9233	Medium	10.64	10.71	0.066	1.651	0.9416	Medium	10.64
AS-604850	77	84	RALETSVA	6.28	2	6	6.1	6.18	2.4	40.004	0.7082	Medium	6.07	6.15	2.49	41.496	0.8363	Medium	6.07	6.15	2.511	41.852	0.8005	Medium	6.07	6.15	3.256	54.272	0.7975	Medium	6.09	6.16	3.262	54.365	0.7787	Medium	6.07	6.15	3.165	52.756	0.8465	Medium	6.07	6.15	3.855	64.244	0.8235	Medium	6.06
AS-604850	79	84	LETSVA	6.27	1	4	6.15	6.23	2.384	59.612	0.8074	Medium	6.19	6.28	2.442	61.046	0.9046	Medium	6.24	6.33	2.448	61.193	0.9158	Medium	6.2	6.31	3.111	77.764	0.8903	Medium	6.24	6.3	3.124	78.11	0.8937	Medium	6.18	6.28	3.189	79.719	0.9168	Medium	6.18	6.28	3.439	85.963	0.9199	Medium	6.18
AS-604850	79	86	LETSVAAD	6.15	1	6	5.98	6.38	3.706	61.761	0.77	Medium	5.98	6.38	3.67	61.171	0.8953	Medium	5.98	6.38	3.777	62.949	0.8623	Medium	5.98	6.38	4.817	80.277	0.8112	Medium	5.98	6.38	4.767	79.451	0.7887	Medium	5.98	6.38	4.521	75.351	0.8677	Medium	5.98	6.38	4.877	81.277	0.8115	Medium	5.98
AS-604850	87	99	FYHRLGPHHFLLL	10.38	2	10	10.4	10.48	0.377	3.768	0.8571	Medium	10.4	10.48	0.372	3.718	0.8943	Medium	10.4	10.48	0.331	3.314	0.909	Medium	10.4	10.48	0.871	8.711	0.8964	Medium	10.39	10.48	0.758	7.575	0.8872	Medium	10.4	10.48	0.66	6.602	0.9225	Medium	10.4	10.48	1.041	10.414	0.8953	Medium	10.39
AS-604850	88	98	YHRLGPHHFLL	8.43	4	8	8.58	8.67	0.383	4.791	0.8522	Medium	8.58	8.67	0.415	5.185	0.9074	Medium	8.58	8.67	0.463	5.788	0.9035	Medium	8.58	8.67	0.963	12.042	0.8321	Medium	8.57	8.66	0.942	11.775	0.8428	Medium	8.58	8.67	0.808	10.102	0.9194	Medium	8.58	8.67	1.205	15.057	0.8598	Medium	8.57
AS-604850	88	99	YHRLGPHHFLLL	9.88	4	9	9.84	10.38	0.408	4.529	0.9125	High	9.84	10.38	0.39	4.334	0.9217	High	9.85	10.38	0.41	4.552	0.9496	High	9.85	10.38	0.917	10.192	0.9159	High	9.84	10.38	0.808	8.981	0.9258	High	9.85	10.38	0.745	8.281	0.9526	High	9.84	10.38	1.109	12.318	0.9386	High	9.84
AS-604850	100	106	YQKKGQW	5.9	1	5	6	6.09	1.678	33.551	0.9187	Medium	6	6.09	1.621	32.419	0.9137	High	6	6.09	1.73	34.601	0.8944	Medium	6	6.09	2.708	54.158	0.8924	Medium	6	6.09	2.643	52.868	0.8976	Medium	6	6.09	2.707	54.136	0.9186	Medium	6	6.09	2.98	59.598	0.9228	Medium	6
AS-604850	107	113	YEIYDKY	9.1	1	5	8.99	9.18	1.43	28.604	0.7501	Medium	8.98	9.18	1.291	25.817	0.89	Medium	8.99	9.18	1.403	28.052	0.8596	Medium	8.99	9.18	2.229	44.584	0.7856	Medium	8.98	9.18	2.182	43.648	0.7723	Medium	8.99	9.18	2.251	45.024	0.8552	Medium	8.99	9.18	2.807	56.141	0.8113	Medium	8.98
AS-604850	107	118	YEIYDKYQVVQT	9.45	2	10	9.41	9.47	1.342	13.423	0.7573	Medium	9.4	9.47	1.294	12.937	0.9161	High	9.41	9.48	1.316	13.164	0.8931	High	9.41	9.48	2.291	22.907	0.8711	Medium	9.4	9.47	2.304	23.039	0.842	Medium	9.41	9.48	2.153	21.535	0.9173	High	9.41	9.47	3.56	35.6	0.8697	Medium	9.4
AS-604850	107	121	YEIYDKYQVVQTLDC	11.03	2	13	11.13	11.22	2.52	19.382	0.8028	Medium	11.12	11.22	2.327	17.898	0.9406	Medium	11.13	11.22	2.529	19.456	0.9259	Medium	11.13	11.22	3.193	24.561	0.8769	Medium	11.12	11.22	3.383	26.024	0.878	Medium	11.13	11.22	3.325	25.578	0.9317	Medium	11.13	11.22	4.771	36.696	0.8929	Medium	11.12
AS-604850	114	119	QVVQTL	8.16	1	4	8.17	8.26	0.082	2.047	0.7846	Medium	8.18	8.27	0.053	1.332	0.8729	Medium	8.18	8.27	0.08	1.992	0.8037	Medium	8.17	8.27	0.115	2.877	0.8315	Medium	8.18	8.27	0.047	1.179	0.8095	Medium	8.17	8.27	0.078	1.946	0.8658	Medium	8.17	8.27	0.189	4.726	0.8441	Medium	8.17
AS-604850	122	137	LRYWKATHRSPGQIHL	7.45	4	13	7.44	7.95	0.809	6.222	0.8831	Medium	7.45	7.95	0.577	4.442	0.9158	Medium	7.44	7.95	0.525	4.038	0.9023	Medium	7.44	7.95	1.768	13.602	0.8999	Medium	7.45	7.95	1.689	12.991	0.8969	Medium	7.44	7.95	1.292	9.941	0.9049	Medium	7.44	7.95	3.097	23.819	0.9085	Medium	7.44
AS-604850	125	137	WKATHRSPGQIHL	6.9	3	10	6.81	6.88	0.73	7.3	0.6147	Medium	6.82	6.88	0.733	7.328	0.8753	Medium	6.81	6.88	0.99	9.905	0.7791	Medium	6.81	6.88	1.677	16.767	0.8435	Medium	6.82	6.88	1.557	15.568	0.8144	Medium	6.81	6.88	1.543	15.435	0.8857	Medium	6.81	6.88	2.104	21.045	0.9091	Medium	6.81
AS-604850	138	149	VQRHPPSEESQA	4.07	2	8	3.94	4.38	3.588	44.844	0.885	Medium	3.98	4.07	3.408	42.604	0.9166	High	3.94	4.38	3.471	43.393	0.9304	High	3.94	4.38	4.222	52.776	0.916	Medium	3.94	4.38	4.165	52.058	0.9009	Medium	3.94	4.38	4.236	52.952	0.9312	High	4.06	4.14	5.183	64.788	0.931	High	4.14
AS-604850	138	150	VQRHPPSEESQAF	6.68	2	9	6.54	6.95	3.111	34.567	0.801	Medium	6.54	6.95	2.898	32.201	0.8809	Medium	6.54	6.95	2.911	32.343	0.8616	Medium	6.54	6.95	4.212	46.798	0.8511	Medium	6.54	6.95	4.006	44.506	0.8571	Medium	6.54	6.95	4.194	46.601	0.8662	Medium	6.54	6.95	5.219	57.991	0.8579	Medium	6.53
AS-604850	138	157	VQRHPPSEESQAFQRQLTAL	9.74	4	16	9.55	9.94	2.278	14.235	0.7389	Medium	9.55	9.94	1.854	11.59	0.8621	Medium	9.55	9.95	1.945	12.155	0.8375	Medium	9.55	9.95	3.617	22.606	0.7924	Medium	9.55	9.94	3.369	21.059	0.7979	Medium	9.55	9.95	3.34	20.876	0.8362	Medium	9.55	9.94	5.846	36.538	0.7882	Medium	9.55
AS-604850	150	157	FQRQLTAL	9.07	2	6	9.04	9.14	0.17	2.826	0.8886	Medium	9.05	9.14	0.191	3.185	0.9184	High	9.05	9.14	0.183	3.043	0.8998	Medium	9.05	9.14	0.36	6.004	0.9177	Medium	9.04	9.13	0.349	5.821	0.9237	Medium	9.05	9.14	0.372	6.196	0.9178	Medium	9.05	9.14	1.129	18.824	0.9085	High	9.04
AS-604850	151	157	QRQLTAL	7.99	2	5	8.02	8.11	0.165	3.305	0.9414	Medium	8.03	8.12	0.153	3.067	0.9545	High	8.02	8.12	0.137	2.731	0.9436	High	8.02	8.12	0.326	6.528	0.9504	Medium	8.03	8.12	0.34	6.802	0.951	Medium	8.02	8.12	0.328	6.564	0.9471	High	8.02	8.11	1.032	20.637	0.9409	High	8.02
AS-604850	158	164	IGYDVTD	8.21	1	5	8.08	8.31	0.812	16.244	0.7968	Medium	8.08	8.32	0.762	15.249	0.9085	High	8.08	8.32	0.808	16.162	0.8653	Medium	8.08	8.32	1.178	23.56	0.8695	Medium	8.2	8.31	1.161	23.219	0.8777	High	8.08	8.32	1.14	22.798	0.9002	High	8.08	8.32	2.383	47.656	0.8761	Medium	8.08
AS-604850	158	173	IGYDVTDVSNVHDDEL	10.34	2	14	10.25	10.33	3.675	26.251	0.8516	Medium	10.26	10.33	3.067	21.91	0.9269	High	10.26	10.33	3.479	24.853	0.9167	High	10.26	10.33	4.933	35.233	0.8929	Medium	10.25	10.33	4.709	33.637	0.889	Medium	10.26	10.33	4.747	33.907	0.923	High	10.25	10.33	6.364	45.459	0.8817	Medium	10.25
AS-604850	158	174	IGYDVTDVSNVHDDELE	9.9	2	15	9.86	9.93	3.637	24.246	0.8553	Medium	9.86	9.92	2.854	19.024	0.9	High	9.86	9.93	3.484	23.227	0.9131	High	9.86	9.93	4.94	32.932	0.8999	High	9.86	9.92	4.669	31.129	0.8877	Medium	9.86	9.93	4.714	31.429	0.9289	High	9.86	9.93	6.593	43.954	0.9012	High	9.86
AS-604850	161	174	DVTDVSNVHDDELE	8.32	2	12	8.21	8.62	3.351	27.928	0.8451	Medium	8.47	8.54	3.303	27.523	0.7883	Medium	8.22	8.62	3.224	26.87	0.9281	High	8.22	8.62	4.51	37.582	0.9074	Medium	8.22	8.61	4.448	37.064	0.9078	Medium	8.22	8.62	4.421	36.841	0.9298	High	8.21	8.62	5.686	47.385	0.9028	Medium	8.21
AS-604850	165	175	VSNVHDDELEF	10.56	2	9	10.44	10.66	1.176	13.069	0.7516	Medium	10.44	10.66	1.142	12.687	0.824	Medium	10.44	10.66	1.193	13.257	0.8094	Medium	10.44	10.66	2.175	24.166	0.8001	Medium	10.44	10.65	2.136	23.737	0.7879	Medium	10.44	10.66	2.174	24.16	0.8315	Medium	10.44	10.66	2.836	31.51	0.8329	Medium	10.44
AS-604850	174	182	EFTRRGLVT	7.02	2	7	6.99	7.08	0.216	3.08	0.9294	Medium	6.99	7.08	0.22	3.147	0.9575	High	6.99	7.08	0.248	3.548	0.9354	High	6.99	7.08	0.261	3.734	0.9493	High	6.99	7.08	0.249	3.558	0.9307	High	6.99	7.08	0.267	3.821	0.9416	High	6.99	7.08	0.632	9.024	0.9567	High	6.99
AS-604850	174	185	EFTRRGLVTPRM	7.96	3	9	7.82	8.05	0.074	0.826	0.8066	Medium	7.82	8.06	0.205	2.272	0.8934	Medium	7.82	8.06	0.168	1.863	0.8933	Medium	7.82	8.06	0.301	3.349	0.8779	Medium	7.82	8.06	0.254	2.823	0.8208	Medium	7.82	8.06	0.241	2.681	0.9177	Medium	7.82	8.06	0.58	6.44	0.8878	Medium	7.82
AS-604850	174	187	EFTRRGLVTPRMAE	7.6	2	11	7.59	7.66	0.376	3.421	0.7925	Medium	7.55	7.63	0.312	2.833	0.8037	Medium	7.55	7.63	0.357	3.248	0.6452	Medium	7.55	7.63	0.434	3.943	0.745	Medium	7.7	7.77	0.423	3.845	0.8344	Medium	7.54	7.63	0.463	4.21	0.7326	Medium	7.54	7.63	0.935	8.503	0.8396	Medium	7.54
AS-604850	174	195	EFTRRGLVTPRMAEVASRDPKL	8.28	5	18	8.13	8.45	1.298	7.213	0.7971	Medium	8.13	8.45	1.07	5.947	0.8928	Medium	8.13	8.45	1.226	6.811	0.8794	Medium	8.13	8.45	1.932	10.735	0.8181	Medium	8.13	8.45	1.778	9.878	0.865	Medium	8.13	8.45	1.897	10.541	0.8703	Medium	8.13	8.45	3.525	19.584	0.8084	Medium	8.13
AS-604850	175	182	FTRRGLVT	6.2	2	6	6.13	6.34	0.223	3.725	0.8594	Medium	6.14	6.35	0.222	3.696	0.9211	Medium	6.13	6.34	0.175	2.92	0.8983	Medium	6.13	6.34	0.249	4.143	0.891	Medium	6.14	6.35	0.211	3.511	0.8812	Medium	6.13	6.34	0.246	4.096	0.9159	Medium	6.13	6.34	0.654	10.896	0.9011	Medium	6.13
AS-604850	176	182	TRRGLVT	4.73	2	5	4.86	4.95	0.163	3.254	0.9255	Medium	4.86	4.95	0.166	3.317	0.9444	Medium	4.86	4.95	0.169	3.388	0.9537	Medium	4.86	4.95	0.211	4.22	0.9357	Medium	4.86	4.95	0.198	3.962	0.8884	Medium	4.86	4.95	0.219	4.386	0.9333	Medium	4.86	4.95	0.585	11.708	0.955	Medium	4.85
AS-604850	176	185	TRRGLVTPRM	6.49	2	7	6.5	6.59	0.185	2.644	0.7647	Medium	6.51	6.6	0.229	3.266	0.8352	Medium	6.5	6.6	0.23	3.282	0.7805	Medium	6.5	6.6	0.252	3.601	0.8781	Medium	6.51	6.6	0.273	3.9	0.8198	Medium	6.5	6.6	0.344	4.908	0.8728	Medium	6.5	6.59	0.65	9.291	0.8961	Medium	6.5
AS-604850	183	195	PRMAEVASRDPKL	6.78	3	10	6.66	6.99	1.255	12.554	0.8341	Medium	6.66	6.99	1.251	12.509	0.9053	Medium	6.66	6.99	1.249	12.485	0.9061	Medium	6.66	6.99	1.914	19.143	0.8939	Medium	6.66	6.99	1.912	19.118	0.9035	Medium	6.66	6.99	1.948	19.482	0.913	Medium	6.66	6.99	3.202	32.016	0.8986	Medium	6.66
AS-604850	186	195	AEVASRDPKL	5.95	2	7	5.87	6.28	1.19	16.996	0.9215	Medium	5.88	6.28	1.257	17.952	0.9405	High	5.87	6.28	1.216	17.367	0.9383	High	5.87	6.28	1.851	26.445	0.9339	High	5.88	6.28	1.828	26.111	0.9345	High	5.87	6.28	1.843	26.333	0.9326	High	5.87	6.28	2.973	42.478	0.9577	High	5.87
AS-604850	188	195	VASRDPKL	5.26	2	5	5.21	5.59	1.227	24.549	0.7438	Medium	5.21	5.59	1.15	22.998	0.82	Medium	5.21	5.59	1.225	24.506	0.8246	Medium	5.21	5.59	1.769	35.382	0.9039	Medium	5.21	5.59	1.736	34.729	0.8979	Medium	5.21	5.59	1.777	35.533	0.8863	High	5.21	5.59	2.491	49.82	0.9131	High	5.21
AS-604850	196	211	YAMHPWVTSKPLPEYL	11.65	3	11	11.54	12.1	3.324	30.216	0.9009	High	11.54	12.1	3.138	28.526	0.9035	High	11.54	12.1	3.137	28.516	0.905	High	11.54	12.1	4.343	39.482	0.925	High	11.53	12.11	4.222	38.381	0.9184	High	11.54	12.1	4.171	37.919	0.8993	High	11.54	12.1	5.842	53.111	0.9162	High	11.54
AS-604850	212	221	WKKIANNCIF	10.39	2	8	10.45	10.51	2.173	27.165	0.9185	High	10.45	10.52	2.032	25.4	0.9225	High	10.45	10.52	2.034	25.429	0.9231	High	10.45	10.52	3.328	41.594	0.9349	High	10.44	10.51	3.15	39.376	0.949	High	10.45	10.52	3.158	39.47	0.9366	High	10.45	10.51	4.811	60.133	0.9301	High	10.44
AS-604850	222	232	IVIHRSTTSQT	4.59	2	9	4.71	4.79	3.23	35.892	0.9227	Medium	4.53	4.62	3.073	34.14	0.8947	Medium	4.64	4.73	3.146	34.954	0.9417	Medium	4.64	4.73	3.207	35.631	0.933	Medium	4.64	4.73	3.281	36.457	0.921	Medium	4.64	4.73	3.186	35.403	0.9331	Medium	4.64	4.73	3.525	39.161	0.9191	Medium	4.64
AS-604850	223	233	VIHRSTTSQTI	4.58	3	9	4.55	4.92	3.259	36.206	0.8317	Medium	4.55	4.93	3.307	36.739	0.8366	Medium	4.55	4.93	3.232	35.913	0.8867	Medium	4.55	4.92	3.273	36.372	0.8411	Medium	4.55	4.93	3.275	36.388	0.8122	Medium	4.55	4.92	3.182	35.351	0.8985	Medium	4.55	4.92	3.418	37.982	0.8761	Medium	4.54
AS-604850	232	245	TIKVSPDDTPGAIL	10.16	2	10	10.12	10.13	1.504	15.041	0.786	Medium	10.12	10.13	1.46	14.599	0.8845	Medium	10.12	10.13	1.33	13.298	0.8681	Medium	10.12	10.13	2.127	21.274	0.8333	Medium	10.12	10.12	2.037	20.368	0.8346	Medium	10.12	10.13	2.093	20.934	0.8842	Medium	10.12	10.13	3.041	30.406	0.7983	Medium	10.12
AS-604850	233	245	IKVSPDDTPGAIL	9.99	2	9	9.78	10.25	0.999	11.096	0.9107	Medium	9.78	10.26	0.978	10.862	0.9316	High	9.79	10.26	1.003	11.148	0.9242	High	9.79	10.26	1.314	14.602	0.9304	Medium	9.78	10.25	1.299	14.435	0.9346	Medium	9.79	10.26	1.287	14.299	0.9363	High	9.78	10.25	2.251	25.012	0.9234	High	9.78
AS-604850	249	269	FTKMAKKKSLMDIPESQSEQD	7.24	4	18	7.53	7.64	10.291	57.171	0.9267	High	7.27	7.35	10.109	56.16	0.9031	High	7.28	7.39	10.154	56.413	0.9335	High	7.19	7.74	11.073	61.517	0.9394	High	7.19	7.74	10.874	60.411	0.903	High	7.29	7.37	10.648	59.158	0.9274	High	7.42	7.5	11.009	61.163	0.9078	High	7.19
AS-604850	270	278	FVLRVCGRD	8.8	3	7	8.91	8.99	0.342	4.89	0.8038	Medium	8.92	8.99	0.281	4.008	0.8529	Medium	8.91	9	0.289	4.124	0.897	Medium	8.91	9	0.349	4.988	0.8548	Medium	8.97	9.05	0.387	5.524	0.8389	Medium	8.91	9	0.327	4.672	0.9071	Medium	8.91	9	0.825	11.788	0.8718	Medium	8.91
AS-604850	270	281	FVLRVCGRDEYL	11.08	3	10	11.1	11.2	0.368	3.68	0.6607	Medium	11.1	11.21	0.215	2.146	0.9232	Medium	11.1	11.21	0.185	1.854	0.9026	Medium	11.1	11.2	0.323	3.232	0.7878	Medium	11.1	11.2	0.312	3.118	0.7028	Medium	11.1	11.2	0.264	2.639	0.9211	Medium	11.1	11.2	0.798	7.979	0.8516	Medium	11.1
AS-604850	282	291	VGETPIKNFQ	8	1	7	8	8.09	0.677	9.665	0.9087	Medium	8	8.09	0.666	9.51	0.9021	High	8	8.09	0.736	10.511	0.8543	Medium	8	8.09	0.727	10.384	0.8844	Medium	8	8.09	0.71	10.138	0.8748	Medium	8	8.09	0.722	10.308	0.9032	Medium	8	8.09	0.807	11.533	0.9202	High	7.99
AS-604850	282	291	VGETPIKNFQ	8	2	7	7.84	8.35	0.642	9.165	0.9106	High	7.84	8.35	0.668	9.55	0.9332	High	7.84	8.35	0.648	9.256	0.9166	High	7.84	8.35	0.664	9.492	0.9225	High	7.84	8.35	0.695	9.928	0.9039	High	7.84	8.35	0.666	9.521	0.9207	High	7.84	8.35	0.721	10.301	0.9257	High	7.83
AS-604850	282	307	VGETPIKNFQWVRHCLKNGEEIHVVL	11.24	4	23	11.29	11.35	1.217	5.29	0.7234	Medium	11.26	11.35	1.276	5.546	0.8872	Medium	11.26	11.35	1.174	5.103	0.8718	Medium	11.28	11.35	3.708	16.122	0.8742	Medium	11.32	11.39	3.552	15.443	0.873	Medium	11.26	11.35	3.266	14.2	0.9017	Medium	11.25	11.35	4.954	21.539	0.8555	Medium	11.34
AS-604850	292	302	WVRHCLKNGEE	5.33	3	9	5.45	5.56	0.702	7.805	0.9232	Medium	5.46	5.56	0.69	7.665	0.9271	High	5.45	5.56	0.736	8.175	0.9495	High	5.45	5.56	1.988	22.093	0.9433	High	5.46	5.56	2.024	22.494	0.9388	High	5.45	5.56	1.955	21.719	0.9518	High	5.45	5.56	2.284	25.38	0.9584	High	5.45
AS-604850	292	307	WVRHCLKNGEEIHVVL	8.82	4	14	8.75	9.25	0.812	5.798	0.8125	Medium	8.75	9.25	0.719	5.137	0.9062	Medium	8.75	9.25	0.695	4.963	0.9098	Medium	8.75	9.25	2.566	18.33	0.8486	Medium	8.75	9.24	2.486	17.755	0.873	Medium	8.75	9.25	2.117	15.125	0.9206	Medium	8.75	9.25	3.58	25.573	0.8476	Medium	8.75
AS-604850	308	315	DTPPDPAL	8.37	1	3	8.36	8.44	0.65	21.658	0.8783	Medium	8.36	8.45	0.661	22.021	0.9109	Medium	8.36	8.44	0.671	22.357	0.8904	Medium	8.36	8.44	1.361	45.354	0.9071	Medium	8.36	8.44	1.348	44.943	0.9038	Medium	8.36	8.44	1.393	46.423	0.9085	Medium	8.36	8.44	1.775	59.182	0.8824	Medium	8.35
AS-604850	316	335	DEVRKEEWPLVDDCTGVTGY	12.39	2	17	12.28	12.63	8.004	47.085	0.7875	Medium	12.28	12.63	7.755	45.617	0.6924	Medium	12.29	12.63	7.825	46.032	0.8426	Medium	12.29	12.63	8.834	51.962	0.8664	Medium	12.28	12.63	8.548	50.283	0.7973	Medium	12.29	12.63	8.41	49.469	0.8719	Medium	12.29	12.63	9.477	55.745	0.9264	High	12.28
AS-604850	316	339	DEVRKEEWPLVDDCTGVTGYHEQL	11.9	3	21	11.96	12.02	9.225	43.93	0.7724	Medium	11.96	12.02	9.064	43.161	0.7436	Medium	11.96	12.03	9.219	43.899	0.8735	Medium	11.96	12.03	10.22	48.665	0.7995	Medium	11.95	12.03	9.846	46.886	0.8138	Medium	11.96	12.03	9.897	47.126	0.8748	Medium	11.96	12.03	11.176	53.219	0.8214	Medium	11.96
AS-604850	328	339	DCTGVTGYHEQL	8.95	2	10	8.78	9.03	6.163	61.634	0.7087	Medium	8.78	9.02	6.235	62.345	0.8662	Medium	8.78	9.03	6.382	63.824	0.8265	Medium	8.78	9.03	6.662	66.616	0.8385	Medium	8.77	9.03	6.659	66.586	0.8189	Medium	8.78	9.03	6.58	65.797	0.8833	Medium	8.78	9.03	6.788	67.879	0.7665	Medium	8.77
AS-604850	336	350	HEQLTIHGKDHESVF	7.44	3	13	7.37	7.85	4.888	37.603	0.7545	Medium	7.38	7.86	4.392	33.781	0.8935	Medium	7.38	7.86	4.509	34.681	0.896	Medium	7.38	7.86	5.612	43.166	0.8205	Medium	7.38	7.86	5.46	42.003	0.825	Medium	7.38	7.86	4.588	35.292	0.9141	Medium	7.38	7.85	5.621	43.239	0.8615	Medium	7.37
AS-604850	340	350	TIHGKDHESVF	6.75	2	9	6.75	6.85	2.357	26.19	0.8739	Medium	6.76	6.86	2.379	26.429	0.8993	High	6.76	6.86	2.387	26.524	0.8873	High	6.76	6.86	2.517	27.962	0.9019	High	6.76	6.86	2.491	27.683	0.9055	Medium	6.76	6.86	2.432	27.02	0.9129	High	6.75	6.85	2.542	28.244	0.9219	High	6.75
AS-604850	355	379	WDCDRKFRVKIRGIDIPVLPRNTDL	10.43	5	21	10.59	10.68	3.463	16.491	0.7452	Medium	10.59	10.68	3.173	15.107	0.8084	Medium	10.59	10.69	3.348	15.941	0.8269	Medium	10.59	10.68	4.441	21.146	0.7162	Medium	10.59	10.68	3.988	18.99	0.7308	Medium	10.59	10.68	4.209	20.045	0.8073	Medium	10.59	10.68	5.987	28.509	0.8958	Medium	10.59
AS-604850	370	379	IPVLPRNTDL	9.61	2	7	9.53	9.62	3.869	55.274	0.7728	Medium	9.5	9.58	3.92	56.002	0.7145	Medium	9.54	9.62	3.889	55.562	0.8588	Medium	9.56	9.65	4.375	62.495	0.7403	Medium	9.53	9.61	4.546	64.936	0.6756	Medium	9.55	9.63	4.607	65.811	0.8207	Medium	9.53	9.62	5.515	78.782	0.9023	Medium	9.53
AS-604850	382	394	FVEANIQHGQQVL	9.08	2	11	8.98	9.37	1.327	12.061	0.7992	Medium	8.97	9.37	1.275	11.592	0.9189	High	8.98	9.38	1.357	12.341	0.918	Medium	8.98	9.38	1.999	18.175	0.8239	Medium	8.97	9.37	1.867	16.975	0.8482	Medium	8.98	9.38	2.186	19.869	0.8905	Medium	8.98	9.37	2.421	22.01	0.9126	High	8.98
AS-604850	383	394	VEANIQHGQQVL	7.88	2	10	7.72	8.3	1.269	12.694	0.8238	Medium	7.72	8.3	1.248	12.479	0.8887	Medium	7.72	8.3	1.359	13.594	0.9156	Medium	7.72	8.3	1.931	19.309	0.802	Medium	7.72	8.3	1.853	18.53	0.8312	Medium	7.72	8.3	2.097	20.971	0.8633	Medium	7.72	8.3	2.499	24.992	0.9238	High	7.72
AS-604850	395	407	CQRRTSPKPFTEE	5.48	3	9	5.45	5.98	0.905	10.053	0.7737	Medium	5.46	5.98	0.98	10.89	0.8609	Medium	5.45	5.98	1.097	12.192	0.8827	Medium	5.45	5.98	1.748	19.418	0.8248	Medium	5.46	5.98	1.67	18.56	0.8299	Medium	5.45	5.98	1.74	19.331	0.8623	Medium	5.45	5.98	2.794	31.039	0.9494	High	5.45
AS-604850	417	428	SIKIKDLPKGAL	8.16	2	9	8.2	8.29	0.371	4.125	0.9196	Medium	8.2	8.29	0.3	3.33	0.8975	Medium	8.2	8.29	0.304	3.376	0.933	Medium	8.2	8.29	0.686	7.625	0.9222	Medium	8.2	8.29	0.68	7.558	0.8913	Medium	8.2	8.29	0.662	7.353	0.9265	Medium	8.2	8.29	1.648	18.312	0.9269	High	8.2
AS-604850	463	468	YVNLLL	13.37	1	4	13.32	13.39	0.137	3.417	0.5467	Medium	13.32	13.41	0.099	2.476	0.5556	Medium	13.32	13.41	0.073	1.828	0.6134	Medium	13.32	13.41	0.115	2.864	0.5945	Medium	13.45	13.52	0.131	3.271	0.6109	Medium	13.41	13.48	0.052	1.311	0.7462	Medium	13.32	13.41	0.387	9.663	0.8671	Medium	13.31
AS-604850	467	479	LLIDHRFLLRRGE	8.97	4	11	9.03	9.13	0.683	6.207	0.8416	Medium	9.02	9.13	0.581	5.28	0.9051	Medium	9.03	9.13	0.622	5.656	0.9122	Medium	9.03	9.13	1.575	14.32	0.8158	Medium	9.03	9.13	1.486	13.509	0.7418	Medium	9.03	9.13	1.604	14.579	0.8769	Medium	9.03	9.13	2.519	22.903	0.9278	High	9.03
AS-604850	467	480	LLIDHRFLLRRGEY	9.61	4	12	9.58	9.66	0.643	5.361	0.91	Medium	9.58	9.65	0.607	5.057	0.9182	Medium	9.59	9.66	0.615	5.127	0.9395	High	9.66	9.74	1.824	15.201	0.854	Medium	9.58	9.65	1.534	12.786	0.9073	Medium	9.58	9.66	1.504	12.532	0.9132	Medium	9.58	9.66	2.554	21.285	0.9498	High	9.58
AS-604850	485	497	WQISGKGEDQGSF	9.72	2	11	9.88	9.94	6.567	59.698	0.7366	Medium	9.87	9.94	5.544	50.4	0.8758	Medium	9.88	9.95	6.27	57.005	0.9053	Medium	9.81	9.89	6.793	61.754	0.6346	Medium	9.87	9.94	6.683	60.751	0.8187	Medium	9.88	9.95	6.012	54.653	0.8846	Medium	9.88	9.94	8.01	72.82	0.8839	Medium	9.87
AS-604850	498	515	NADKLTSATNPDKENSMS	6	3	15	5.75	6.45	2.666	17.775	0.8417	Medium	5.75	6.45	2.505	16.7	0.9214	Medium	5.75	6.45	2.689	17.929	0.9122	High	5.75	6.45	4.231	28.206	0.8515	Medium	5.75	6.45	4.062	27.079	0.8474	Medium	5.75	6.45	4.332	28.878	0.8937	Medium	5.75	6.45	5.578	37.184	0.9329	High	5.74
AS-604850	498	517	NADKLTSATNPDKENSMSIS	7.37	3	17	7.43	7.5	2.734	16.08	0.4186	Medium	7.22	7.55	2.371	13.946	0.6596	Medium	7.22	7.55	2.375	13.969	0.7245	Medium	7.22	7.55	3.883	22.843	0.5534	Medium	7.22	7.55	3.814	22.434	0.5651	Medium	7.22	7.54	4.027	23.687	0.7065	Medium	7.22	7.54	5.433	31.96	0.7606	Medium	7.21
AS-604850	520	551	LDNYCHPIALPKHQPTPDPEGDRVRAEMPNQL	8.81	4	24	8.61	9.3	11.884	49.515	0.8016	Medium	8.9	8.99	11.37	47.375	0.882	High	8.61	9.31	11.729	48.87	0.9239	High	8.61	9.31	13.715	57.144	0.84	Medium	8.61	9.3	13.305	55.439	0.8021	Medium	8.61	9.31	13.226	55.108	0.9099	High	8.61	9.31	14.32	59.667	0.925	High	8.61
AS-604850	523	551	YCHPIALPKHQPTPDPEGDRVRAEMPNQL	8.37	5	21	8.34	8.52	10.654	50.735	0.5566	Medium	8.47	8.55	10.865	51.738	0.6609	Medium	8.18	8.63	10.445	49.74	0.7863	Medium	8.39	8.47	12.406	59.077	0.6187	Medium	8.45	8.52	12.547	59.747	0.6036	Medium	8.37	8.45	12.862	61.247	0.6726	Medium	8.17	8.63	12.819	61.043	0.8084	Medium	8.17
AS-604850	557	573	AIIATDPLNPLTAEDKE	10.7	2	13	10.87	10.95	4.266	32.817	0.6296	Medium	10.6	10.68	3.941	30.314	0.8973	High	10.6	10.69	4.01	30.847	0.8152	Medium	10.64	10.73	6.398	49.214	0.8541	Medium	10.64	10.73	6.313	48.563	0.8079	Medium	10.64	10.74	6.51	50.08	0.9162	High	10.64	10.73	9.287	71.439	0.906	High	10.64
AS-604850	557	578	AIIATDPLNPLTAEDKELLWHF	13.73	3	18	13.84	13.91	4.9	27.22	0.7177	Medium	13.72	13.79	4.615	25.638	0.7405	Medium	13.68	13.76	4.769	26.493	0.7362	Medium	13.67	13.76	7.27	40.387	0.8415	Medium	13.8	13.88	7.373	40.963	0.6774	Medium	13.67	13.76	7.151	39.729	0.7943	Medium	13.67	13.76	11.411	63.392	0.8694	Medium	13.67
AS-604850	558	571	IIATDPLNPLTAED	11.47	1	10	11.55	11.64	3.632	36.323	0.6993	Medium	11.42	11.51	3.686	36.863	0.6981	Medium	11.42	11.51	3.893	38.933	0.7601	Medium	11.41	11.51	5.585	55.846	0.6137	Medium	11.41	11.5	5.468	54.675	0.6514	Medium	11.41	11.51	5.43	54.298	0.6691	Medium	11.41	11.51	7.379	73.794	0.8759	Medium	11.41
AS-604850	558	573	IIATDPLNPLTAEDKE	10.38	2	12	10.56	10.63	4.464	37.199	0.7724	Medium	10.42	10.51	4.122	34.348	0.7635	Medium	10.42	10.49	4.175	34.79	0.796	Medium	10.49	10.57	5.892	49.098	0.8084	Medium	10.49	10.57	5.751	47.926	0.7742	Medium	10.56	10.63	5.845	48.707	0.7962	Medium	10.49	10.57	8.142	67.846	0.8136	Medium	10.49
AS-604850	558	578	IIATDPLNPLTAEDKELLWHF	13.68	3	17	13.8	13.89	4.696	27.623	0.8843	Medium	13.72	13.81	4.25	24.997	0.6699	Medium	13.49	13.96	4.1	24.119	0.8843	Medium	13.49	13.96	6.566	38.624	0.9199	High	13.48	13.95	6.327	37.22	0.8906	Medium	13.49	13.96	6.364	37.436	0.8988	Medium	13.48	13.95	10.431	61.358	0.9229	High	13.48
AS-604850	559	573	IATDPLNPLTAEDKE	9.92	2	11	9.87	9.89	5.047	45.884	0.5528	Medium	9.86	9.89	3.987	36.249	0.6817	Medium	9.87	9.9	4.392	39.927	0.6828	Medium	9.87	9.9	6.305	57.318	0.6715	Medium	9.86	9.89	6.011	54.648	0.6332	Medium	9.87	9.9	5.814	52.855	0.7565	Medium	9.87	9.89	7.828	71.165	0.7049	Medium	9.87
AS-604850	574	578	LLWHF	13.11	2	3	13.1	13.17	0.287	9.573	0.9092	High	13.1	13.18	0.26	8.667	0.9033	High	13.1	13.18	0.223	7.422	0.903	High	13.1	13.18	0.634	21.127	0.9112	High	13.15	13.23	0.68	22.671	0.9145	High	13.1	13.18	0.65	21.657	0.9126	High	13.1	13.17	1.437	47.905	0.9457	High	13.1
AS-604850	579	592	RYESLKHPKAYPKL	6.32	4	10	6.58	6.65	1.685	16.854	0.9172	High	6.23	6.3	1.479	14.788	0.8729	Medium	6.29	6.37	1.448	14.476	0.9235	Medium	6.37	6.47	3.165	31.646	0.9099	Medium	6.37	6.47	3.111	31.111	0.9088	Medium	6.32	6.39	3.048	30.484	0.9284	Medium	6.37	6.47	5.199	51.992	0.8805	Medium	6.37
AS-604850	602	607	EIVAKT	4.54	1	4	4.6	4.69	0.649	16.217	0.7821	Medium	4.6	4.69	0.704	17.605	0.9398	Medium	4.6	4.69	0.711	17.778	0.934	Medium	4.6	4.69	1.591	39.779	0.8825	Medium	4.6	4.69	1.585	39.626	0.8545	Medium	4.6	4.69	1.581	39.534	0.9071	Medium	4.6	4.69	3.155	78.878	0.9206	Medium	4.59
AS-604850	611	622	LARREVWDQSAL	9.4	2	10	9.33	9.42	6.454	64.545	0.8766	Medium	9.34	9.42	6.198	61.98	0.8632	Medium	9.33	9.43	6.298	62.981	0.8878	Medium	9.33	9.43	6.773	67.725	0.8911	Medium	9.33	9.42	6.706	67.058	0.8833	Medium	9.33	9.43	6.656	66.558	0.9103	Medium	9.33	9.42	6.848	68.482	0.9096	High	9.33
AS-604850	612	622	ARREVWDQSAL	9.08	3	9	9.13	9.22	5.965	66.279	0.9088	Medium	9.13	9.23	5.801	64.46	0.8953	Medium	9.13	9.22	5.926	65.847	0.8842	Medium	9.13	9.22	6.11	67.887	0.9329	High	9.13	9.22	6.049	67.215	0.8986	Medium	9.13	9.22	6.056	67.29	0.9172	High	9.13	9.22	6.141	68.236	0.9367	High	9.13
AS-604850	623	630	DVGLTMQL	11.91	2	6	12.06	12.12	1.536	25.601	0.6067	Medium	11.97	12.04	0.736	12.267	0.9155	Medium	12.11	12.19	0.594	9.899	0.8931	Medium	12.11	12.18	1.601	26.675	0.7769	Medium	12.11	12.18	1.699	28.324	0.7208	Medium	12.11	12.19	1.652	27.539	0.8519	Medium	12.11	12.18	3.488	58.128	0.7918	Medium	12.11
AS-604850	631	635	LDCNF	10.64	1	3	10.61	10.79	0.583	19.447	0.8843	Medium	10.8	10.87	0.509	16.951	0.8799	Medium	10.58	10.65	0.492	16.411	0.8502	Medium	10.68	10.77	0.912	30.387	0.9364	Medium	10.68	10.76	0.894	29.794	0.9223	Medium	10.68	10.77	0.944	31.451	0.9315	Medium	10.68	10.77	1.903	63.44	0.9326	Medium	10.68
AS-604850	636	642	SDENVRA	4.34	1	5	4.45	4.53	0.929	18.579	0.8684	Medium	4.34	4.42	0.803	16.061	0.8436	Medium	4.36	4.4	0.855	17.107	0.8449	Medium	4.36	4.4	1.146	22.924	0.8128	Medium	4.36	4.4	1.248	24.955	0.75	Medium	4.36	4.39	1.095	21.909	0.8871	Medium	4.36	4.39	2.302	46.049	0.8733	Medium	4.36
AS-604850	643	650	IAVQKLES	6.86	1	6	6.85	6.86	0.916	15.273	0.7312	Medium	6.85	6.87	0.711	11.847	0.7576	Medium	6.85	6.87	0.852	14.201	0.8183	Medium	6.85	6.87	1.069	17.822	0.7495	Medium	6.85	6.87	1.096	18.26	0.6861	Medium	6.85	6.86	0.922	15.367	0.7823	Medium	6.85	6.86	1.688	28.13	0.7578	Medium	6.84
AS-604850	643	651	IAVQKLESL	9.62	1	7	9.43	9.8	0.789	11.271	0.7339	Medium	9.43	9.8	0.858	12.253	0.8133	Medium	9.43	9.8	0.812	11.605	0.8798	Medium	9.43	9.8	0.955	13.648	0.8277	Medium	9.43	9.8	0.948	13.548	0.7961	Medium	9.43	9.8	0.995	14.218	0.8885	Medium	9.43	9.8	1.684	24.054	0.8298	Medium	9.43
AS-604850	643	654	IAVQKLESLEDD	9.34	2	10	9.26	9.35	1.79	17.902	0.8111	Medium	9.27	9.35	1.652	16.522	0.8888	Medium	9.27	9.35	1.756	17.563	0.8707	Medium	9.27	9.35	2.381	23.805	0.8648	Medium	9.27	9.34	2.223	22.228	0.8129	Medium	9.27	9.35	2.446	24.458	0.8961	Medium	9.26	9.35	3.261	32.613	0.8782	Medium	9.26
AS-604850	643	657	IAVQKLESLEDDDVL	11.41	2	13	11.21	11.5	2.015	15.502	0.6946	Medium	11.22	11.5	1.674	12.876	0.8183	Medium	11.21	11.5	1.771	13.622	0.7897	Medium	11.21	11.5	2.478	19.063	0.7942	Medium	11.21	11.49	2.334	17.95	0.7798	Medium	11.21	11.5	2.34	17.997	0.792	Medium	11.21	11.5	3.385	26.042	0.7929	Medium	11.21
AS-604850	652	657	EDDDVL	9.03	1	4	9.09	9.17	0.194	4.842	0.6556	Medium	9.22	9.3	0.169	4.237	0.7301	Medium	9.15	9.23	0.144	3.593	0.8331	Medium	9.09	9.17	0.315	7.88	0.8216	Medium	9.08	9.18	0.324	8.1	0.7729	Medium	9.09	9.17	0.263	6.581	0.8615	Medium	9.09	9.17	0.614	15.349	0.8497	Medium	9.08
AS-604850	654	662	DDVLHYLLQ	12.91	2	7	12.91	13.01	0.17	2.424	0.5815	Medium	12.91	13.02	0.12	1.716	0.6672	Medium	12.91	13.02	0.13	1.853	0.7451	Medium	12.91	13.02	0.304	4.349	0.6163	Medium	12.9	13.01	0.193	2.752	0.657	Medium	12.91	13.02	0.211	3.011	0.7562	Medium	12.82	12.9	1.15	16.431	0.6082	Medium	12.88
AS-604850	655	662	DVLHYLLQ	12.82	2	6	12.59	12.95	0.096	1.602	0.6771	Medium	12.59	12.95	0.113	1.875	0.7063	Medium	12.59	12.95	0.136	2.261	0.7692	Medium	12.59	12.95	0.255	4.246	0.6642	Medium	12.58	12.94	0.232	3.864	0.6678	Medium	12.59	12.95	0.269	4.49	0.7917	Medium	12.59	12.95	1.189	19.809	0.8069	Medium	12.58
AS-604850	655	663	DVLHYLLQL	14.29	2	7	14.17	14.52	0.129	1.849	0.7788	Medium	14.18	14.53	0.09	1.286	0.7929	Medium	14.18	14.53	0.091	1.305	0.8493	Medium	14.17	14.53	0.323	4.615	0.8423	Medium	14.17	14.52	0.326	4.655	0.793	Medium	14.18	14.53	0.262	3.746	0.8403	Medium	14.17	14.53	1.272	18.166	0.8971	Medium	14.17
AS-604850	658	665	HYLLQLVQ	11.67	2	6	11.65	11.68	0.287	4.788	0.5404	Medium	11.66	11.68	0.141	2.357	0.7039	Medium	11.66	11.68	0.147	2.456	0.773	Medium	11.66	11.68	0.19	3.171	0.606	Medium	11.65	11.68	0.181	3.01	0.64	Medium	11.66	11.68	0.205	3.422	0.803	Medium	11.66	11.68	0.611	10.176	0.6675	Medium	11.65
AS-604850	663	677	LVQAVKFEPYHDSAL	9.66	3	12	9.66	9.75	0.503	4.194	0.8874	Medium	9.65	9.75	0.392	3.27	0.917	Medium	9.66	9.75	0.379	3.162	0.9261	Medium	9.66	9.75	0.798	6.65	0.9158	High	9.65	9.75	0.798	6.654	0.9091	Medium	9.66	9.75	0.787	6.556	0.9385	High	9.66	9.75	0.961	8.006	0.9165	Medium	9.66
AS-604850	664	677	VQAVKFEPYHDSAL	9.26	2	11	9.11	9.52	0.514	4.669	0.8863	Medium	9.12	9.52	0.376	3.42	0.9096	Medium	9.12	9.53	0.391	3.558	0.9385	Medium	9.12	9.53	0.814	7.398	0.9125	Medium	9.11	9.52	0.779	7.086	0.9169	Medium	9.11	9.53	0.817	7.426	0.9341	Medium	9.11	9.52	1.015	9.23	0.9147	Medium	9.11
AS-604850	666	677	AVKFEPYHDSAL	8.87	2	9	8.86	8.95	0.51	5.664	0.7619	Medium	8.94	8.98	0.353	3.924	0.8209	Medium	8.86	8.96	0.407	4.524	0.7765	Medium	8.86	8.96	0.792	8.798	0.8712	Medium	8.86	8.95	0.766	8.511	0.7695	Medium	8.86	8.96	0.876	9.73	0.8384	Medium	8.86	8.95	0.987	10.97	0.8998	Medium	8.86
AS-604850	681	697	LLKRGLRNKRIGHFLFW	10.27	5	15	10.49	10.58	0.067	0.445	0.9427	Medium	10.49	10.58	0.027	0.177	0.9074	Medium	10.49	10.58	0.053	0.352	0.9393	High	10.49	10.58	0.08	0.532	0.9448	High	10.49	10.58	0.08	0.532	0.9393	High	10.49	10.58	0.046	0.309	0.9298	High	10.49	10.58	0.227	1.517	0.9496	High	10.49
AS-604850	698	713	FLRSEIAQSRHYQQRF	7.69	4	14	7.52	7.93	0.795	5.676	0.857	Medium	7.52	7.93	0.551	3.933	0.8735	Medium	7.52	7.93	0.589	4.207	0.8546	Medium	7.52	7.93	1.062	7.587	0.8939	Medium	7.52	7.93	1.028	7.342	0.8858	Medium	7.52	7.93	0.969	6.925	0.8805	Medium	7.52	7.93	2.533	18.094	0.8914	Medium	7.52
AS-604850	700	713	RSEIAQSRHYQQRF	5.79	4	12	5.77	6.29	0.551	4.589	0.8776	Medium	5.77	6.3	0.431	3.591	0.9223	High	5.77	6.29	0.45	3.752	0.9308	High	5.77	6.29	0.905	7.541	0.9197	High	5.77	6.3	0.88	7.332	0.9201	High	5.77	6.29	0.734	6.115	0.9321	High	5.77	6.29	2.212	18.436	0.926	High	5.77
AS-604850	714	719	AVILEA	9.26	1	4	9.19	9.33	0.033	0.827	0.86	Medium	9.19	9.34	0.032	0.801	0.857	Medium	9.19	9.33	0.025	0.623	0.8821	Medium	9.19	9.33	0.027	0.687	0.8646	Medium	9.19	9.33	0.005	0.135	0.9076	Medium	9.19	9.33	0.062	1.549	0.8546	Medium	9.19	9.33	0.026	0.653	0.8271	Medium	9.19
AS-604850	720	729	YLRGCGTAML	9.99	2	8	10.04	10.09	0.206	2.575	0.839	Medium	10.03	10.1	0.237	2.967	0.8879	Medium	10.04	10.1	0.245	3.056	0.8826	Medium	10.04	10.1	0.626	7.831	0.8891	Medium	10.03	10.09	0.721	9.013	0.828	Medium	10.04	10.1	0.628	7.848	0.9308	Medium	10.04	10.09	1.394	17.423	0.8868	Medium	10.03
AS-604850	729	737	LHDFTQQVQ	7.59	2	7	7.46	7.65	0.135	1.922	0.7217	Medium	7.46	7.66	0.099	1.411	0.8316	Medium	7.46	7.65	0.121	1.732	0.8171	Medium	7.46	7.65	0.056	0.795	0.8467	Medium	7.46	7.66	0.104	1.48	0.836	Medium	7.46	7.65	0.094	1.338	0.8664	Medium	7.46	7.65	0.099	1.417	0.8069	Medium	7.46
AS-604850	732	737	FTQQVQ	5.63	1	4	5.57	5.69	0.169	4.221	0.7147	Medium	5.57	5.69	0.11	2.739	0.8189	Medium	5.57	5.69	0.082	2.06	0.8077	Medium	5.57	5.69	0.078	1.96	0.8613	Medium	5.57	5.69	0.065	1.63	0.8398	Medium	5.57	5.69	0.05	1.251	0.8867	Medium	5.57	5.69	0.078	1.962	0.8604	Medium	5.57
AS-604850	732	738	FTQQVQV	8.12	1	5	8.22	8.3	0.21	4.206	0.8089	Medium	8.18	8.26	0.098	1.966	0.8846	Medium	8.25	8.33	0.068	1.364	0.887	Medium	8.17	8.26	0.22	4.402	0.7776	Medium	8.23	8.31	0.247	4.934	0.824	Medium	8.17	8.26	0.228	4.552	0.8474	Medium	8.17	8.26	0.222	4.447	0.8053	Medium	8.17
AS-604850	742	747	LQKVTL	8.23	1	4	8.2	8.33	0.174	4.345	0.9455	Medium	8.2	8.34	0.255	6.369	0.9506	Medium	8.2	8.33	0.221	5.525	0.9448	Medium	8.2	8.33	0.998	24.95	0.9073	Medium	8.2	8.34	0.963	24.074	0.9406	Medium	8.2	8.33	0.983	24.572	0.9242	Medium	8.2	8.33	2.185	54.63	0.9491	Medium	8.2
AS-604850	748	761	DIKSLSAEKYDVSS	8	2	12	7.87	8.2	9.374	78.115	0.8117	Medium	7.87	8.2	9.138	76.146	0.8958	High	7.87	8.2	9.49	79.083	0.8921	High	7.87	8.2	10.003	83.356	0.871	Medium	7.87	8.2	9.781	81.511	0.8586	Medium	7.87	8.2	9.498	79.148	0.9173	High	7.87	8.2	9.846	82.048	0.8891	High	7.87
AS-604850	748	767	DIKSLSAEKYDVSSQVISQL	11.14	3	18	10.94	11.34	14.183	78.795	0.788	Medium	10.94	11.35	13.792	76.623	0.8547	Medium	10.95	11.35	13.859	76.994	0.8893	Medium	10.94	11.35	14.427	80.148	0.8536	Medium	10.94	11.34	14.089	78.27	0.8389	Medium	10.94	11.35	14.107	78.37	0.9031	Medium	10.94	11.35	14.44	80.225	0.8754	Medium	10.94
AS-604850	748	782	DIKSLSAEKYDVSSQVISQLKQKLENLQNSQLPES	12.49	5	32	12.23	12.75	17.975	56.171	0.828	Medium	12.23	12.76	17.779	55.558	0.8468	Medium	12.24	12.76	17.925	56.015	0.8879	High	12.24	12.76	22.444	70.136	0.8845	High	12.23	12.75	21.773	68.04	0.8523	Medium	12.24	12.76	22.184	69.325	0.9051	High	12.24	12.76	25.416	79.423	0.8774	High	12.23
AS-604850	755	782	EKYDVSSQVISQLKQKLENLQNSQLPES	12.1	3	25	12.12	12.19	12.681	50.725	0.5863	Medium	12.12	12.21	12.28	49.119	0.7807	Medium	12.12	12.21	12.397	49.589	0.8462	Medium	12.12	12.21	16.914	67.657	0.7972	Medium	12.12	12.21	16.885	67.541	0.7789	Medium	12.12	12.21	16.704	66.817	0.8682	Medium	12.12	12.21	20.09	80.359	0.84	Medium	12.11
AS-604850	762	782	QVISQLKQKLENLQNSQLPES	10.6	2	18	10.41	10.73	8.219	45.66	0.767	Medium	10.42	10.73	8.095	44.974	0.8945	Medium	10.42	10.74	8.042	44.675	0.8908	Medium	10.42	10.73	12.356	68.642	0.8025	Medium	10.41	10.73	12.44	69.112	0.7972	Medium	10.42	10.74	12.321	68.45	0.9087	Medium	10.41	10.73	15.866	88.144	0.8305	Medium	10.41
AS-604850	767	782	LKQKLENLQNSQLPES	7.51	2	13	7.36	7.61	4.559	35.069	0.8131	Medium	7.36	7.61	4.221	32.467	0.8966	Medium	7.36	7.61	4.274	32.875	0.8899	Medium	7.36	7.61	7.2	55.387	0.8358	Medium	7.36	7.61	7.067	54.36	0.8085	Medium	7.36	7.61	7.142	54.935	0.8893	Medium	7.36	7.61	10.108	77.753	0.8902	Medium	7.36
AS-604850	768	782	KQKLENLQNSQLPES	7.13	2	12	6.96	7.45	4.305	35.871	0.9413	High	6.97	7.45	4.09	34.083	0.9535	High	6.97	7.45	4.072	33.931	0.9453	High	6.97	7.45	6.619	55.159	0.9454	High	6.97	7.45	6.554	54.617	0.9413	High	6.97	7.45	6.686	55.714	0.9357	High	6.96	7.45	9.253	77.106	0.9384	High	6.96
AS-604850	783	796	FRVPYDPGLKAGAL	10.16	3	10	10.22	10.3	0.268	2.682	0.8952	High	10.22	10.31	0.285	2.853	0.9036	High	10.22	10.31	0.3	2.996	0.8912	High	10.22	10.31	0.424	4.244	0.9067	High	10.22	10.3	0.428	4.276	0.9062	High	10.22	10.31	0.414	4.139	0.9068	High	10.22	10.3	1.476	14.763	0.9114	High	10.22
AS-604850	797	812	AIEKCKVMASKKKPLW	6.81	4	13	6.98	7.06	2.517	19.358	0.9198	Medium	6.98	7.07	2.06	15.848	0.9441	Medium	6.98	7.07	2.059	15.836	0.9467	Medium	6.98	7.07	2.793	21.488	0.9266	Medium	6.98	7.07	2.738	21.059	0.9282	Medium	6.98	7.07	2.335	17.961	0.9411	Medium	6.98	7.06	4.036	31.046	0.8924	Medium	6.98
AS-604850	797	815	AIEKCKVMASKKKPLWLEF	10.45	2	16	10.29	10.71	2.266	14.164	0.7887	Medium	10.29	10.72	1.407	8.796	0.9037	Medium	10.29	10.72	1.429	8.932	0.9033	Medium	10.29	10.72	2.578	16.111	0.8611	Medium	10.28	10.71	2.348	14.678	0.8724	Medium	10.29	10.72	1.638	10.24	0.9116	Medium	10.29	10.72	3.827	23.917	0.865	Medium	10.29
AS-604850	802	815	KVMASKKKPLWLEF	10.71	4	11	10.86	10.94	1.22	11.089	0.7982	Medium	10.86	10.94	1.052	9.562	0.8811	Medium	10.86	10.95	0.962	8.748	0.9163	Medium	10.78	10.85	1.373	12.481	0.819	Medium	10.92	11	1.317	11.972	0.8336	Medium	10.77	10.84	1.154	10.489	0.82	Medium	10.74	10.81	1.926	17.509	0.7797	Medium	10.81
AS-604850	816	823	KCADPTAL	7.06	1	5	6.88	7.17	2.05	40.995	0.8409	Medium	6.88	7.18	1.117	22.337	0.9095	Medium	6.88	7.18	1.169	23.375	0.895	Medium	6.88	7.18	2.635	52.692	0.877	Medium	6.88	7.18	2.615	52.308	0.8745	Medium	6.88	7.18	2.611	52.218	0.9067	Medium	6.88	7.17	3.72	74.394	0.868	Medium	6.88
AS-604850	816	825	KCADPTALSN	5.74	2	7	5.63	5.7	2.942	42.022	0.7065	Medium	5.62	5.69	3.003	42.898	0.7756	Medium	5.67	5.75	2.818	40.258	0.8245	Medium	5.69	5.78	4.233	60.472	0.9173	Medium	5.69	5.78	4.147	59.239	0.8969	Medium	5.69	5.78	4.287	61.249	0.9241	Medium	5.69	5.78	5.315	75.934	0.9233	Medium	5.69
AS-604850	816	829	KCADPTALSNETIG	8.17	2	11	8.01	8.42	4.77	43.366	0.7044	Medium	8.02	8.43	3.95	35.913	0.8979	Medium	8.02	8.43	4.078	37.073	0.8694	Medium	8.02	8.43	5.991	54.46	0.8321	Medium	8.02	8.43	5.642	51.288	0.8304	Medium	8.02	8.43	6.033	54.843	0.8901	Medium	8.01	8.42	7.249	65.899	0.8225	Medium	8.01
AS-604850	816	842	KCADPTALSNETIGIIFKHGDDLRQDM	11.89	5	24	12.04	12.11	4.504	18.768	0.7752	Medium	12.01	12.07	3.88	16.166	0.8965	Medium	12.01	12.08	3.938	16.41	0.9033	High	12.01	12.08	5.876	24.482	0.8709	Medium	12.01	12.08	5.634	23.476	0.8815	High	12.01	12.08	5.87	24.459	0.899	High	12.01	12.08	8.154	33.973	0.8617	High	12.01
AS-604850	824	829	SNETIG	5.53	1	4	5.6	5.67	1.599	39.972	0.7201	Medium	5.56	5.62	1.466	36.655	0.7956	Medium	5.61	5.67	1.545	38.634	0.8084	Medium	5.54	5.62	2.04	51.01	0.7502	Medium	5.54	5.62	1.959	48.986	0.7444	Medium	5.54	5.62	2.006	50.152	0.8264	Medium	5.54	5.62	2.33	58.261	0.8395	Medium	5.61
AS-604850	824	842	SNETIGIIFKHGDDLRQDM	10.75	4	17	10.86	10.94	0.936	5.508	0.8004	Medium	10.86	10.94	0.755	4.441	0.8961	Medium	10.86	10.95	0.779	4.581	0.9087	Medium	10.86	10.94	1.841	10.83	0.8388	Medium	10.85	10.94	1.833	10.781	0.8739	Medium	10.86	10.94	1.555	9.147	0.9097	Medium	10.86	10.94	3.476	20.447	0.8117	Medium	10.86
AS-604850	844	848	ILQIL	12.17	1	3	12.2	12.28	0.029	0.957	0.898	Medium	12.2	12.28	0.043	1.433	0.8977	Medium	12.2	12.29	0.005	0.176	0.8922	Medium	12.2	12.29	0.017	0.572	0.9107	Medium	12.2	12.28	0.013	0.448	0.892	Medium	12.2	12.29	0.02	0.671	0.9122	Medium	12.2	12.29	0.011	0.368	0.9037	Medium	12.2
AS-604850	849	855	RIMESIW	11.65	2	5	11.6	11.68	0.145	2.898	0.6337	Medium	11.66	11.72	0.043	0.852	0.8245	Medium	11.6	11.68	0.109	2.18	0.7255	Medium	11.6	11.68	0.056	1.12	0.7672	Medium	11.69	11.76	0.033	0.668	0.778	Medium	11.67	11.75	0.061	1.226	0.8601	Medium	11.6	11.68	0.096	1.922	0.7905	Medium	11.59
AS-604850	849	862	RIMESIWETESLDL	13.25	2	12	13.17	13.39	0.439	3.656	0.6767	Medium	13.18	13.4	0.556	4.636	0.891	Medium	13.18	13.4	0.614	5.12	0.9083	Medium	13.18	13.39	1.018	8.483	0.8631	Medium	13.17	13.39	0.911	7.595	0.8665	Medium	13.18	13.39	0.923	7.694	0.9062	Medium	13.17	13.39	2.007	16.729	0.8681	Medium	13.17
AS-604850	853	862	SIWETESLDL	13.27	2	8	13.36	13.42	0.496	6.194	0.6943	Medium	13.36	13.42	0.448	5.595	0.8634	Medium	13.36	13.42	0.432	5.399	0.8996	Medium	13.36	13.42	0.892	11.149	0.8352	Medium	13.36	13.41	0.83	10.374	0.8726	Medium	13.36	13.42	0.724	9.05	0.921	Medium	13.36	13.42	1.813	22.663	0.8377	Medium	13.36
AS-604850	862	878	LCLLPYGCISTGDKIGM	13.06	3	14	12.96	13.06	0.126	0.9	0.5661	Medium	12.97	13.06	0.184	1.315	0.8062	Medium	12.97	13.06	0.001	0.009	0.6942	Medium	12.97	13.06	0.377	2.694	0.6811	Medium	13.1	13.18	0.406	2.902	0.7584	Medium	12.97	13.06	0.45	3.213	0.8017	Medium	13.02	13.09	1.304	9.311	0.7979	Medium	12.97
AS-604850	863	869	CLLPYGC	11.86	1	4	11.77	11.86	0.111	2.777	0.6462	Medium	11.77	11.87	0.099	2.484	0.7229	Medium	11.78	11.87	0.169	4.219	0.7511	Medium	11.78	11.87	0.296	7.396	0.7899	Medium	11.77	11.87	0.279	6.982	0.7039	Medium	11.78	11.87	0.313	7.823	0.7872	Medium	11.77	11.87	0.758	18.943	0.7382	Medium	11.77
AS-604850	863	878	CLLPYGCISTGDKIGM	12.04	2	13	11.9	12.48	0.409	3.143	0.8428	Medium	11.9	12.48	0.417	3.211	0.9016	Medium	11.9	12.48	0.448	3.448	0.9114	Medium	11.9	12.48	0.625	4.808	0.8795	Medium	11.9	12.47	0.799	6.143	0.8975	Medium	11.9	12.48	0.636	4.893	0.9223	Medium	11.9	12.48	1.685	12.962	0.9195	Medium	11.9
AS-604850	863	880	CLLPYGCISTGDKIGMIE	12.38	2	15	12.39	12.49	0.387	2.582	0.7679	Medium	12.4	12.49	0.353	2.355	0.8864	Medium	12.4	12.49	0.413	2.757	0.8907	Medium	12.39	12.49	0.587	3.914	0.8438	Medium	12.39	12.48	0.598	3.988	0.8341	Medium	12.4	12.49	0.517	3.444	0.9073	Medium	12.39	12.49	1.483	9.89	0.8617	High	12.39
AS-604850	865	878	LPYGCISTGDKIGM	10.57	2	12	10.35	10.72	0.579	4.824	0.5849	Medium	10.35	10.72	0.415	3.459	0.72	Medium	10.35	10.73	0.465	3.872	0.7372	Medium	10.35	10.73	0.701	5.841	0.683	Medium	10.34	10.72	0.742	6.18	0.6792	Medium	10.35	10.73	0.604	5.029	0.7444	Medium	10.35	10.72	1.715	14.293	0.6763	Medium	10.34
AS-604850	879	887	IEIVKDATT	7.08	1	7	7.02	7.39	1.215	17.359	0.9254	Medium	7.03	7.4	1.163	16.619	0.9191	High	7.02	7.39	1.158	16.549	0.9193	Medium	7.02	7.39	1.972	28.178	0.9201	Medium	7.03	7.4	1.983	28.322	0.9251	Medium	7.02	7.39	1.963	28.046	0.9156	High	7.02	7.39	2.97	42.434	0.9055	Medium	7.02
AS-604850	879	889	IEIVKDATTIA	9.23	1	9	9.03	9.3	1.323	14.699	0.8722	Medium	9.02	9.3	1.214	13.491	0.8828	Medium	9.03	9.3	1.243	13.811	0.8971	Medium	9.03	9.3	2.149	23.878	0.8879	Medium	9.03	9.29	2.162	24.026	0.8757	Medium	9.03	9.3	2.208	24.534	0.904	Medium	9.03	9.3	3.219	35.768	0.9023	Medium	9.03
AS-604850	881	901	IVKDATTIAKIQQSTVGNTGA	8.37	3	19	8.26	8.55	7.552	39.75	0.7521	Medium	8.26	8.55	7.292	38.379	0.8782	Medium	8.26	8.55	7.458	39.251	0.8475	Medium	8.26	8.55	8.364	44.019	0.8395	Medium	8.26	8.55	8.253	43.439	0.8126	Medium	8.26	8.55	8.145	42.87	0.8952	Medium	8.26	8.55	9.306	48.98	0.8515	Medium	8.25
AS-604850	888	902	IAKIQQSTVGNTGAF	8.64	2	13	8.63	8.7	6.967	53.589	0.8499	Medium	8.66	8.72	6.796	52.277	0.829	Medium	8.54	8.62	7.105	54.656	0.7865	Medium	8.54	8.62	7.931	61.009	0.8135	Medium	8.54	8.61	7.728	59.45	0.7165	Medium	8.54	8.62	7.993	61.482	0.8349	Medium	8.53	8.62	8.33	64.08	0.8612	Medium	8.53
AS-604850	888	907	IAKIQQSTVGNTGAFKDEVL	9.51	3	18	9.55	9.62	7.469	41.493	0.7517	Medium	9.55	9.61	7.064	39.243	0.8609	Medium	9.55	9.62	7.345	40.807	0.8768	Medium	9.55	9.62	8.625	47.915	0.8201	Medium	9.55	9.61	8.44	46.892	0.794	Medium	9.55	9.62	8.532	47.398	0.8815	Medium	9.55	9.62	9.917	55.096	0.8356	Medium	9.55
AS-604850	902	910	FKDEVLNHW	10.1	3	7	9.96	10.28	0.165	2.357	0.769	Medium	9.96	10.28	0.232	3.321	0.8751	Medium	9.96	10.28	0.201	2.875	0.9167	Medium	9.96	10.28	0.309	4.419	0.8481	Medium	9.96	10.28	0.362	5.169	0.8116	Medium	9.96	10.28	0.313	4.476	0.9106	Medium	9.96	10.28	0.905	12.93	0.8867	Medium	9.96
AS-604850	902	924	FKDEVLNHWLKEKSPTEEKFQAA	9.54	4	20	9.4	9.78	1.678	8.389	0.7158	Medium	9.39	9.78	1.563	7.817	0.8286	Medium	9.4	9.79	1.496	7.482	0.8661	Medium	9.4	9.79	2.656	13.28	0.8165	Medium	9.39	9.78	2.604	13.022	0.8021	Medium	9.4	9.79	2.384	11.919	0.8797	Medium	9.4	9.78	4.102	20.509	0.8291	Medium	9.4
AS-604850	908	924	NHWLKEKSPTEEKFQAA	7.08	3	14	7.01	7.23	1.633	11.661	0.6268	Medium	7.02	7.24	1.536	10.972	0.8221	Medium	7.02	7.23	1.585	11.32	0.8114	Medium	7.02	7.23	2.494	17.812	0.7858	Medium	7.02	7.24	2.524	18.027	0.7609	Medium	7.02	7.23	2.491	17.794	0.8484	Medium	7.01	7.23	3.432	24.513	0.8308	Medium	7.01
AS-604850	925	934	VERFVYSCAG	9.08	1	8	9.1	9.17	0.32	4.002	0.772	Medium	9.11	9.18	0.109	1.361	0.8182	Medium	9.11	9.17	0.158	1.977	0.8667	Medium	9.11	9.17	0.197	2.462	0.8551	Medium	9.1	9.18	0.125	1.568	0.775	Medium	9.11	9.17	0.183	2.282	0.8841	High	9.1	9.17	0.201	2.511	0.8624	Medium	9.1
AS-604850	927	934	RFVYSCAG	8.29	1	6	8.29	8.36	0.178	2.966	0.6725	Medium	8.29	8.36	0.085	1.416	0.9001	High	8.29	8.36	0.059	0.976	0.8578	High	8.29	8.36	0.186	3.103	0.8139	Medium	8.31	8.38	0.106	1.766	0.7918	Medium	8.29	8.36	0.064	1.069	0.8663	High	8.29	8.36	0.13	2.166	0.8334	Medium	8.29
AS-604850	935	939	YCVAT	6.8	1	3	6.82	6.91	0.022	0.747	0.8618	Medium	6.82	6.92	0.024	0.801	0.913	Medium	6.82	6.92	0.002	0.057	0.8838	Medium	6.82	6.92	0.016	0.517	0.9245	Medium	6.82	6.92	0.03	0.985	0.8998	Medium	6.82	6.92	0.042	1.398	0.9291	Medium	6.82	6.91	0.047	1.571	0.9229	Medium	6.82
AS-604850	940	953	FVLGIGDRHNDNIM	10.54	3	12	10.61	10.7	0.179	1.49	0.9139	Medium	10.61	10.7	0.187	1.561	0.9103	High	10.61	10.7	0.161	1.342	0.9064	High	10.61	10.7	0.301	2.506	0.9395	High	10.6	10.7	0.336	2.798	0.9231	High	10.61	10.7	0.252	2.097	0.9201	High	10.61	10.7	0.782	6.515	0.9336	High	10.6
AS-604850	954	960	ITETGNL	7.56	1	5	7.7	7.79	0.29	5.809	0.8273	Medium	7.71	7.8	0.215	4.308	0.9036	Medium	7.7	7.8	0.182	3.638	0.9158	Medium	7.7	7.8	0.661	13.214	0.8988	Medium	7.71	7.8	0.681	13.626	0.9027	Medium	7.7	7.8	0.666	13.312	0.9224	Medium	7.7	7.8	1.149	22.977	0.8716	Medium	7.7
AS-604850	954	961	ITETGNLF	11.33	1	6	11.18	11.28	0.266	4.427	0.7565	Medium	11.18	11.28	0.33	5.506	0.7632	Medium	11.19	11.28	0.409	6.815	0.7891	Medium	11.19	11.28	0.801	13.347	0.8489	Medium	11.18	11.27	0.753	12.548	0.7206	Medium	11.19	11.28	0.734	12.233	0.7957	Medium	11.19	11.28	0.965	16.076	0.8854	Medium	11.18
AS-604850	954	975	ITETGNLFHIDFGHILGNYKSF	13.27	3	20	13.28	13.35	5.416	27.082	0.6858	Medium	13.23	13.31	5.393	26.967	0.802	Medium	13.23	13.31	5.282	26.41	0.8275	Medium	13.23	13.31	6.194	30.968	0.8498	Medium	13.22	13.31	6.029	30.147	0.7804	Medium	13.23	13.31	6.187	30.937	0.8635	Medium	13.22	13.31	6.712	33.561	0.8695	Medium	13.22
AS-604850	954	976	ITETGNLFHIDFGHILGNYKSFL	13.82	4	21	13.73	14.05	5.49	26.142	0.6389	Medium	13.73	14.05	6.039	28.759	0.7247	Medium	13.73	14.05	6.302	30.008	0.7422	Medium	13.73	14.05	7.402	35.246	0.7659	Medium	13.72	14.04	7.141	34.005	0.7116	Medium	13.73	14.05	7.407	35.27	0.7669	Medium	13.73	14.05	7.829	37.279	0.8183	Medium	13.73
AS-604850	954	992	ITETGNLFHIDFGHILGNYKSFLGINKERVPFVLTPDFL	13.93	5	35	14.03	14.1	8.488	24.251	0.7742	Medium	13.94	14.04	9.38	26.8	0.8534	Medium	13.94	14.04	9.091	25.974	0.8392	Medium	13.94	14.04	10.707	30.591	0.8497	Medium	13.93	14.04	9.91	28.314	0.8286	Medium	13.94	14.04	10.328	29.508	0.8394	Medium	13.94	14.04	11.453	32.721	0.8669	Medium	13.94
AS-604850	961	972	FHIDFGHILGNY	12.72	3	10	12.54	12.97	2.277	22.766	0.8346	Medium	12.54	12.98	3	30.004	0.8758	Medium	12.54	12.98	3.056	30.561	0.9014	Medium	12.54	12.97	4.025	40.251	0.8252	Medium	12.53	12.97	3.906	39.055	0.7977	Medium	12.54	12.98	3.851	38.506	0.9134	Medium	12.54	12.97	4.418	44.183	0.877	Medium	12.53
AS-604850	961	975	FHIDFGHILGNYKSF	12.39	4	13	12.29	12.36	5.187	39.899	0.6619	Medium	12.32	12.51	5.197	39.978	0.8473	Medium	12.33	12.51	5.166	39.737	0.8723	Medium	12.33	12.5	6.239	47.99	0.7966	Medium	12.32	12.5	6.17	47.461	0.7106	Medium	12.33	12.51	5.996	46.126	0.8893	Medium	12.33	12.5	6.58	50.618	0.8611	High	12.32
AS-604850	961	976	FHIDFGHILGNYKSFL	13.36	4	14	13.2	13.62	4.92	35.144	0.669	Medium	13.2	13.62	6.217	44.409	0.779	Medium	13.2	13.62	6.232	44.512	0.825	Medium	13.2	13.62	7.107	50.767	0.7058	Medium	13.2	13.62	6.157	43.977	0.7404	Medium	13.2	13.62	7.038	50.271	0.8638	Medium	13.2	13.62	7.365	52.605	0.7777	Medium	13.2
AS-604850	961	992	FHIDFGHILGNYKSFLGINKERVPFVLTPDFL	13.78	5	28	13.72	13.79	8.662	30.935	0.7034	Medium	13.72	13.8	9.285	33.161	0.7265	Medium	13.72	13.8	9.103	32.509	0.7154	Medium	13.72	13.8	10.779	38.495	0.8162	Medium	13.72	13.79	10.297	36.775	0.6825	Medium	13.72	13.8	10.426	37.235	0.7807	Medium	13.72	13.8	11.58	41.357	0.8265	Medium	13.72
AS-604850	962	975	HIDFGHILGNYKSF	11.38	3	12	11.32	11.39	5.572	46.433	0.7321	Medium	11.31	11.39	5.592	46.599	0.7599	Medium	11.31	11.39	5.622	46.846	0.8278	Medium	11.31	11.39	6.471	53.927	0.7778	Medium	11.3	11.38	6.467	53.888	0.7274	Medium	11.31	11.39	6.429	53.572	0.8566	Medium	11.3	11.39	6.823	56.856	0.8363	Medium	11.3
AS-604850	973	992	KSFLGINKERVPFVLTPDFL	12.87	4	16	12.79	12.86	4.554	28.462	0.8514	Medium	12.79	12.87	3.756	23.476	0.8862	High	12.79	12.87	3.67	22.934	0.9131	High	12.79	12.86	4.762	29.764	0.8737	Medium	12.79	12.86	4.564	28.524	0.8867	High	12.79	12.87	4.066	25.41	0.917	High	12.79	12.86	5.289	33.056	0.8993	High	12.79
AS-604850	976	992	LGINKERVPFVLTPDFL	13.06	3	13	13.27	13.34	2.801	21.544	0.9031	High	12.93	13.48	2.536	19.505	0.9351	High	12.93	13.48	2.345	18.04	0.9374	High	12.93	13.48	3.031	23.312	0.9423	High	12.93	13.47	2.952	22.704	0.9429	High	12.93	13.48	2.72	20.926	0.9421	High	12.93	13.48	3.608	27.757	0.9404	High	12.93
AS-604850	977	992	GINKERVPFVLTPDFL	12.98	3	12	12.75	13.2	2.102	17.518	0.871	Medium	12.75	13.2	1.84	15.334	0.8961	Medium	12.75	13.2	1.708	14.234	0.9141	Medium	12.75	13.2	2.262	18.849	0.8854	Medium	12.74	13.2	2.261	18.846	0.889	Medium	12.75	13.2	2.034	16.948	0.9206	Medium	12.75	13.2	2.818	23.484	0.929	Medium	12.74
AS-604850	993	1014	FVMGTSGKKTSPHFQKFQDICV	9.54	2	19	9.4	9.75	1.779	9.361	0.757	Medium	9.39	9.75	1.202	6.326	0.8557	Medium	9.4	9.75	1.109	5.839	0.8863	Medium	9.4	9.75	2.317	12.195	0.8407	Medium	9.39	9.75	2.058	10.833	0.8318	Medium	9.4	9.75	1.288	6.778	0.8949	Medium	9.4	9.75	3.113	16.384	0.8736	Medium	9.4
AS-604850	1015	1026	KAYLALRHHTNL	6.32	2	10	6.3	6.54	0.319	3.193	0.7767	Medium	6.3	6.55	0.255	2.547	0.8711	Medium	6.3	6.55	0.209	2.088	0.9076	Medium	6.3	6.55	0.366	3.663	0.8139	Medium	6.3	6.55	0.347	3.475	0.8037	Medium	6.3	6.55	0.242	2.416	0.9112	Medium	6.3	6.54	0.699	6.986	0.8516	Medium	6.3
AS-604850	1015	1027	KAYLALRHHTNLL	7.62	4	11	7.74	7.81	0.266	2.417	0.6953	Medium	7.75	7.82	0.219	1.991	0.8378	Medium	7.75	7.81	0.097	0.883	0.8916	Medium	7.75	7.81	0.337	3.062	0.8086	Medium	7.75	7.82	0.411	3.737	0.7864	Medium	7.75	7.81	0.161	1.467	0.8909	Medium	7.74	7.81	0.727	6.614	0.8412	Medium	7.74
AS-604850	1017	1026	YLALRHHTNL	6.64	3	8	6.79	6.85	0.308	3.846	0.8724	Medium	6.79	6.86	0.249	3.112	0.9022	Medium	6.79	6.86	0.226	2.824	0.9338	Medium	6.79	6.86	0.337	4.214	0.8937	Medium	6.79	6.86	0.387	4.834	0.8799	Medium	6.79	6.86	0.276	3.449	0.9167	Medium	6.79	6.85	0.649	8.114	0.9142	Medium	6.79
AS-604850	1017	1027	YLALRHHTNLL	8.29	2	9	8.2	8.37	0.23	2.556	0.6441	Medium	8.2	8.37	0.196	2.181	0.6678	Medium	8.2	8.37	0.199	2.21	0.7264	Medium	8.2	8.37	0.308	3.427	0.772	Medium	8.2	8.37	0.213	2.372	0.7201	Medium	8.2	8.37	0.148	1.647	0.768	Medium	8.2	8.37	0.584	6.489	0.7831	Medium	8.2
AS-604850	1019	1026	ALRHHTNL	4.09	2	6	4.19	4.26	0.406	6.765	0.8388	Medium	4.2	4.26	0.362	6.035	0.8411	Medium	4.19	4.26	0.344	5.727	0.8852	Medium	4.19	4.26	0.492	8.204	0.8948	Medium	4.19	4.26	0.425	7.088	0.8936	Medium	4.19	4.26	0.327	5.45	0.9001	Medium	4.19	4.26	0.725	12.091	0.8972	Medium	4.19
AS-604850	1019	1027	ALRHHTNLL	6.22	2	7	6.26	6.43	0.239	3.412	0.8109	Medium	6.26	6.44	0.257	3.668	0.8351	Medium	6.26	6.44	0.181	2.58	0.8732	Medium	6.26	6.44	0.276	3.937	0.865	Medium	6.26	6.44	0.223	3.189	0.8735	Medium	6.26	6.44	0.192	2.75	0.8975	Medium	6.26	6.43	0.597	8.522	0.9124	Medium	6.26
AS-604850	1031	1035	FSMML	13.4	1	3	13.28	13.5	0.006	0.21	0.8489	Medium	13.29	13.5	0.026	0.871	0.8784	Medium	13.29	13.5	0.025	0.822	0.8861	Medium	13.28	13.5	0.022	0.743	0.906	Medium	13.28	13.5	0.021	0.71	0.8912	Medium	13.29	13.5	0.024	0.81	0.912	Medium	13.28	13.5	0.066	2.216	0.9	Medium	13.28
AS-604850	1035	1042	LMTGMPQL	11.7	2	5	11.69	11.76	1.748	34.952	0.641	Medium	11.77	11.85	1.655	33.101	0.8019	Medium	11.73	11.8	1.67	33.392	0.7913	Medium	11.69	11.76	2.19	43.81	0.7689	Medium	11.69	11.76	2.175	43.497	0.6261	Medium	11.78	11.85	2.291	45.817	0.8912	Medium	11.69	11.76	3.226	64.528	0.7584	Medium	11.69
AS-604850	1035	1050	LMTGMPQLTSKEDIEY	10.99	2	13	10.75	11.13	4.119	31.684	0.7057	Medium	10.75	11.13	4.056	31.201	0.8512	Medium	10.75	11.14	4.108	31.6	0.8664	Medium	10.75	11.14	6.324	48.647	0.8092	Medium	10.75	11.13	6.207	47.745	0.8089	Medium	10.75	11.14	5.658	43.522	0.8599	Medium	10.75	11.14	8.874	68.264	0.8771	Medium	10.75
AS-604850	1036	1042	MTGMPQL	11.2	1	4	10.87	11.12	1.492	37.308	0.6707	Medium	10.87	11.12	1.412	35.307	0.6981	Medium	10.87	11.12	1.767	44.181	0.7802	Medium	10.87	11.12	2.478	61.952	0.7747	Medium	10.86	11.12	2.442	61.051	0.7655	Medium	10.87	11.12	2.463	61.586	0.8129	Medium	10.87	11.12	3.174	79.347	0.8275	Medium	10.86
AS-604850	1050	1071	YIRDALTVGKNEEDAKKYFLDQ	9.72	4	20	9.77	9.87	2.616	13.078	0.8937	Medium	9.76	9.86	2.476	12.381	0.9267	High	9.77	9.87	2.522	12.612	0.9241	High	9.77	9.87	2.775	13.875	0.9221	High	9.76	9.86	2.785	13.926	0.9208	High	9.77	9.87	2.714	13.57	0.9276	High	9.77	9.87	3.575	17.873	0.9172	High	9.76
AS-604850	1051	1069	IRDALTVGKNEEDAKKYFL	9.61	5	17	9.46	9.74	2.218	13.048	0.7769	Medium	9.45	9.74	1.945	11.44	0.8425	Medium	9.46	9.75	2.036	11.977	0.8937	Medium	9.46	9.74	2.41	14.177	0.8417	Medium	9.45	9.74	2.288	13.456	0.8338	Medium	9.46	9.74	2.234	13.138	0.8945	Medium	9.46	9.74	3.165	18.62	0.8432	Medium	9.45
AS-604850	1051	1071	IRDALTVGKNEEDAKKYFLDQ	9.5	3	19	9.26	9.72	2.536	13.346	0.8319	Medium	9.27	9.71	2.464	12.968	0.8988	Medium	9.27	9.72	2.475	13.029	0.9095	High	9.27	9.72	2.78	14.63	0.894	Medium	9.27	9.71	2.736	14.401	0.9011	Medium	9.27	9.72	2.668	14.041	0.9154	High	9.26	9.72	3.431	18.057	0.8882	Medium	9.26
AS-604850	1051	1073	IRDALTVGKNEEDAKKYFLDQIE	10.45	4	21	10.22	10.61	2.522	12.012	0.7244	Medium	10.22	10.62	2.445	11.644	0.8245	Medium	10.22	10.62	2.372	11.294	0.8125	Medium	10.22	10.62	2.737	13.033	0.8149	Medium	10.22	10.61	2.675	12.737	0.8286	Medium	10.22	10.62	2.637	12.557	0.8655	Medium	10.22	10.62	3.326	15.84	0.8067	Medium	10.22
AS-604850	1072	1084	IEVCRDKGWTVQF	11.18	3	11	11.08	11.16	1.459	13.267	0.8373	Medium	11.08	11.16	1.448	13.164	0.8936	Medium	11.09	11.16	1.42	12.911	0.8826	Medium	11.09	11.16	3.825	34.775	0.9007	Medium	11.08	11.16	3.735	33.95	0.879	Medium	11.09	11.16	3.633	33.025	0.9022	Medium	11.25	11.32	5.663	51.481	0.8511	Medium	11.24
AS-604850	1088	1092	LHLVL	11.09	2	3	10.92	11.1	0.866	28.857	0.8376	Medium	10.99	11.07	1.184	39.464	0.8949	Medium	11.06	11.14	1.155	38.492	0.8601	Medium	10.94	11	2.624	87.454	0.9051	Medium	10.93	11	2.603	86.768	0.8875	Medium	10.94	11	2.555	85.175	0.9381	Medium	10.96	11.03	2.623	87.423	0.9031	Medium	11
Gedatolisib	6	12	YKQPVVL	8.77	1	4	8.68	8.89	3.662	91.56	0.9148	Medium	8.68	8.89	3.702	92.557	0.8944	Medium	8.68	8.89	3.688	92.197	0.9145	Medium	8.68	8.89	3.745	93.63	0.8986	Medium	8.68	8.89	3.712	92.809	0.921	Medium	8.68	8.89	3.749	93.733	0.9113	Medium	8.68	8.89	3.732	93.309	0.913	Medium	8.68
Gedatolisib	36	41	ELIPIE	10.59	1	3	10.64	10.73	0.051	1.713	0.9078	Medium	10.64	10.73	0.044	1.478	0.9099	Medium	10.64	10.73	0.036	1.201	0.9022	Medium	10.64	10.74	0.061	2.032	0.9144	Medium	10.64	10.73	0.079	2.631	0.8973	Medium	10.64	10.74	0.065	2.159	0.9128	Medium	10.64	10.73	0.272	9.072	0.9004	Medium	10.64
Gedatolisib	36	42	ELIPIEF	13.88	1	4	13.87	13.96	0.112	2.798	0.8081	Medium	13.93	14.01	0.079	1.972	0.7723	Medium	13.94	14.01	0.095	2.375	0.735	Medium	13.87	13.96	0.162	4.04	0.7695	Medium	13.92	14	0.151	3.777	0.7953	Medium	13.92	14	0.103	2.564	0.7861	Medium	13.86	13.96	0.359	8.976	0.8356	Medium	13.87
Gedatolisib	42	58	FVLPTSQRKCKSPETAL	8.48	3	13	8.09	8.77	4.571	35.16	0.9323	High	8.09	8.77	4.375	33.656	0.9015	High	8.09	8.77	4.407	33.9	0.9098	High	8.09	8.77	5.757	44.286	0.9201	High	8.09	8.77	5.686	43.74	0.9288	High	8.09	8.77	5.477	42.128	0.9084	High	8.09	8.77	6.611	50.856	0.9266	High	8.09
Gedatolisib	42	59	FVLPTSQRKCKSPETALL	9.43	3	14	9.26	9.7	4.188	29.912	0.9218	Medium	9.26	9.7	3.805	27.177	0.9266	High	9.26	9.7	3.868	27.631	0.9305	High	9.26	9.7	5.369	38.347	0.9038	Medium	9.26	9.7	5.241	37.438	0.9094	Medium	9.26	9.7	4.859	34.708	0.9179	High	9.26	9.7	6.217	44.406	0.9182	Medium	9.26
Gedatolisib	59	70	LHVAGHGNVEQM	6.54	2	10	6.78	6.86	1.382	13.822	0.857	Medium	6.78	6.86	1.367	13.669	0.8354	Medium	6.78	6.86	1.206	12.065	0.8792	Medium	6.78	6.87	1.936	19.363	0.8505	Medium	6.78	6.86	2.064	20.635	0.8841	Medium	6.79	6.87	1.868	18.683	0.8641	Medium	6.78	6.86	2.306	23.057	0.8905	Medium	6.78
Gedatolisib	59	72	LHVAGHGNVEQMKA	5.97	2	12	5.9	6.06	0.723	6.021	0.8804	Medium	5.9	6.06	0.534	4.452	0.8611	Medium	5.9	6.06	0.644	5.369	0.8933	Medium	5.9	6.06	1.326	11.052	0.8425	Medium	5.9	6.06	1.265	10.538	0.8137	Medium	5.9	6.06	1.152	9.599	0.8481	Medium	5.9	6.06	2.001	16.673	0.8831	Medium	5.9
Gedatolisib	60	70	HVAGHGNVEQM	5.29	2	9	5.31	5.42	0.651	7.239	0.8912	High	5.31	5.42	0.577	6.408	0.9081	High	5.31	5.42	0.66	7.328	0.9326	High	5.31	5.42	1.287	14.299	0.9134	High	5.31	5.42	1.24	13.772	0.925	High	5.31	5.42	1.182	13.129	0.9246	High	5.31	5.42	1.816	20.183	0.9301	High	5.31
Gedatolisib	60	74	HVAGHGNVEQMKAQV	5.94	3	13	5.9	6.23	0.725	5.577	0.78	Medium	5.9	6.23	0.558	4.289	0.7966	Medium	5.9	6.23	0.699	5.375	0.7998	Medium	5.9	6.24	1.44	11.08	0.7835	Medium	5.9	6.23	1.543	11.868	0.7145	Medium	5.9	6.24	1.028	7.91	0.8024	Medium	5.9	6.24	1.775	13.656	0.8065	Medium	5.9
Gedatolisib	60	75	HVAGHGNVEQMKAQVW	8.28	3	14	8.16	8.48	0.414	2.955	0.8043	Medium	8.16	8.48	0.346	2.471	0.8558	Medium	8.16	8.48	0.338	2.415	0.883	Medium	8.16	8.49	0.808	5.774	0.7946	Medium	8.16	8.49	0.827	5.91	0.7944	Medium	8.16	8.49	0.643	4.595	0.8755	Medium	8.16	8.49	1.439	10.281	0.8357	Medium	8.16
Gedatolisib	71	76	KAQVWL	10.59	2	4	10.64	10.71	0.058	1.449	0.9429	Medium	10.64	10.71	0.045	1.12	0.9578	Medium	10.64	10.71	0.056	1.408	0.9497	Medium	10.64	10.71	0.034	0.841	0.9177	Medium	10.64	10.71	0.052	1.31	0.9406	Medium	10.64	10.71	0.058	1.441	0.9117	Medium	10.64	10.71	0.059	1.468	0.9425	Medium	10.64
Gedatolisib	77	84	RALETSVA	6.28	2	6	6.07	6.15	2.446	40.768	0.8065	Medium	6.07	6.15	2.483	41.376	0.798	Medium	6.07	6.15	2.537	42.279	0.8648	Medium	6.07	6.15	3.289	54.817	0.7949	Medium	6.07	6.15	3.34	55.674	0.7143	Medium	6.07	6.15	3.253	54.221	0.8429	Medium	6.07	6.15	3.879	64.65	0.8498	Medium	6.07
Gedatolisib	79	84	LETSVA	6.27	1	4	6.18	6.28	2.453	61.331	0.8961	Medium	6.15	6.23	2.391	59.771	0.8632	Medium	6.18	6.28	2.496	62.401	0.9135	Medium	6.19	6.28	3.052	76.293	0.9011	Medium	6.18	6.28	3.069	76.737	0.8817	Medium	6.25	6.33	3.019	75.47	0.8956	Medium	6.19	6.28	3.425	85.631	0.9208	Medium	6.18
Gedatolisib	79	86	LETSVAAD	6.15	1	6	5.98	6.38	3.802	63.367	0.8188	Medium	5.98	6.38	3.594	59.896	0.8896	Medium	5.98	6.38	3.742	62.361	0.8922	Medium	5.98	6.38	4.722	78.706	0.8106	Medium	5.98	6.38	4.493	74.879	0.7869	Medium	5.98	6.38	4.481	74.685	0.8666	Medium	5.98	6.38	4.908	81.798	0.8343	Medium	5.98
Gedatolisib	87	99	FYHRLGPHHFLLL	10.38	2	10	10.4	10.48	0.396	3.962	0.9161	Medium	10.4	10.48	0.365	3.646	0.883	Medium	10.4	10.48	0.349	3.487	0.9293	Medium	10.4	10.48	0.851	8.51	0.879	Medium	10.4	10.48	0.811	8.113	0.9065	Medium	10.4	10.48	0.743	7.434	0.8792	Medium	10.4	10.48	1.061	10.611	0.8998	Medium	10.4
Gedatolisib	88	98	YHRLGPHHFLL	8.43	4	8	8.58	8.67	0.404	5.052	0.8656	Medium	8.58	8.67	0.343	4.286	0.9057	Medium	8.58	8.67	0.424	5.295	0.8964	Medium	8.58	8.67	0.973	12.166	0.8018	Medium	8.58	8.67	0.958	11.98	0.8418	Medium	8.58	8.67	0.874	10.926	0.8864	Medium	8.58	8.67	1.161	14.511	0.869	Medium	8.58
Gedatolisib	88	99	YHRLGPHHFLLL	9.88	4	9	9.84	10.38	0.418	4.642	0.9176	High	9.84	10.38	0.357	3.972	0.9322	High	9.84	10.38	0.401	4.453	0.9488	High	9.85	10.38	0.842	9.358	0.9153	High	9.85	10.38	0.848	9.423	0.9304	High	9.85	10.38	0.75	8.335	0.933	High	9.85	10.38	1.089	12.101	0.9443	High	9.85
Gedatolisib	100	106	YQKKGQW	5.9	1	5	6	6.09	1.69	33.797	0.9145	Medium	6	6.09	1.6	31.994	0.933	High	6	6.09	1.704	34.078	0.922	High	6	6.09	2.806	56.113	0.8915	High	6	6.09	2.698	53.965	0.9142	Medium	6	6.09	2.693	53.852	0.9055	Medium	6	6.09	3.019	60.39	0.9134	Medium	6
Gedatolisib	107	113	YEIYDKY	9.1	1	5	8.99	9.18	1.403	28.061	0.8273	Medium	8.99	9.18	1.319	26.384	0.8941	Medium	8.99	9.18	1.405	28.103	0.8767	Medium	8.99	9.18	2.14	42.794	0.7635	Medium	8.99	9.18	2.243	44.856	0.7933	Medium	8.99	9.18	2.144	42.881	0.8608	Medium	8.99	9.18	2.806	56.116	0.8087	Medium	8.99
Gedatolisib	107	118	YEIYDKYQVVQT	9.45	2	10	9.41	9.48	1.405	14.054	0.8719	Medium	9.41	9.47	1.228	12.279	0.9159	High	9.41	9.47	1.302	13.022	0.9168	High	9.41	9.48	2.25	22.496	0.8772	Medium	9.41	9.48	2.28	22.797	0.8341	Medium	9.41	9.48	2.146	21.46	0.9056	High	9.41	9.48	3.565	35.651	0.8848	Medium	9.41
Gedatolisib	107	121	YEIYDKYQVVQTLDC	11.03	2	13	11.13	11.22	2.495	19.194	0.8942	Medium	11.13	11.22	2.324	17.875	0.939	Medium	11.13	11.22	2.45	18.845	0.9309	Medium	11.13	11.22	3.149	24.22	0.8835	Medium	11.2	11.31	3.452	26.552	0.8924	Medium	11.13	11.22	3.225	24.809	0.9409	Medium	11.13	11.22	4.833	37.181	0.8861	Medium	11.13
Gedatolisib	114	119	QVVQTL	8.16	1	4	8.17	8.27	0.056	1.398	0.8413	Medium	8.17	8.27	0.072	1.798	0.8796	Medium	8.17	8.27	0.063	1.587	0.8517	Medium	8.18	8.27	0.076	1.912	0.8134	Medium	8.17	8.27	0.074	1.86	0.8131	Medium	8.18	8.27	0.051	1.276	0.8773	Medium	8.17	8.27	0.196	4.911	0.8358	Medium	8.17
Gedatolisib	122	137	LRYWKATHRSPGQIHL	7.45	4	13	7.44	7.95	0.751	5.773	0.8942	Medium	7.44	7.95	0.561	4.315	0.9056	Medium	7.44	7.95	0.543	4.177	0.8996	Medium	7.44	7.95	1.824	14.029	0.9044	Medium	7.44	7.95	1.698	13.061	0.8925	Medium	7.45	7.95	1.275	9.806	0.9082	Medium	7.44	7.95	3.043	23.407	0.9072	Medium	7.44
Gedatolisib	125	137	WKATHRSPGQIHL	6.9	3	10	6.81	6.88	1.135	11.346	0.7448	Medium	6.81	6.88	0.634	6.336	0.83	Medium	6.81	6.88	0.689	6.89	0.8166	Medium	6.82	6.88	1.791	17.907	0.7919	Medium	6.81	6.88	1.75	17.502	0.7555	Medium	6.82	6.88	1.463	14.628	0.8721	Medium	6.81	6.88	2.041	20.412	0.9185	Medium	6.81
Gedatolisib	138	149	VQRHPPSEESQA	4.07	2	8	4.14	4.23	3.356	41.952	0.8794	Medium	3.98	4.07	3.35	41.877	0.9122	High	3.94	4.38	3.31	41.37	0.9419	High	4.07	4.19	4.345	54.307	0.9162	Medium	3.94	4.38	4.239	52.984	0.9025	Medium	3.94	4.38	4.108	51.352	0.9258	Medium	3.94	4.38	5.142	64.276	0.9319	High	3.94
Gedatolisib	138	150	VQRHPPSEESQAF	6.68	2	9	6.54	6.95	2.976	33.062	0.8666	Medium	6.54	6.95	2.807	31.186	0.8855	Medium	6.54	6.95	2.935	32.608	0.8801	Medium	6.54	6.95	4.112	45.691	0.8468	Medium	6.54	6.95	4.145	46.06	0.8587	Medium	6.54	6.95	4.001	44.455	0.8608	Medium	6.54	6.95	5.412	60.13	0.853	Medium	6.54
Gedatolisib	138	157	VQRHPPSEESQAFQRQLTAL	9.74	4	16	9.55	9.95	2.024	12.652	0.8315	Medium	9.55	9.94	1.79	11.187	0.8567	Medium	9.55	9.95	1.932	12.077	0.8633	Medium	9.55	9.95	3.495	21.844	0.772	Medium	9.55	9.95	3.582	22.39	0.7731	Medium	9.55	9.95	3.218	20.114	0.8249	Medium	9.55	9.95	5.774	36.09	0.8132	Medium	9.55
Gedatolisib	150	157	FQRQLTAL	9.07	2	6	9.05	9.14	0.155	2.591	0.9052	Medium	9.05	9.14	0.16	2.665	0.9112	Medium	9.05	9.14	0.147	2.452	0.9088	Medium	9.05	9.14	0.324	5.393	0.9324	Medium	9.05	9.14	0.35	5.827	0.9223	Medium	9.05	9.14	0.331	5.511	0.9271	Medium	9.05	9.14	1.139	18.979	0.9043	Medium	9.05
Gedatolisib	151	157	QRQLTAL	7.99	2	5	8.02	8.11	0.128	2.563	0.9409	High	8.02	8.11	0.119	2.388	0.9368	High	8.02	8.11	0.125	2.491	0.9394	High	8.02	8.12	0.345	6.899	0.9354	Medium	8.02	8.12	0.319	6.378	0.9393	Medium	8.02	8.12	0.307	6.148	0.9477	High	8.02	8.12	1.008	20.161	0.9399	High	8.02
Gedatolisib	158	164	IGYDVTD	8.21	1	5	8.08	8.32	0.785	15.696	0.8698	Medium	8.08	8.32	0.729	14.572	0.9097	High	8.08	8.32	0.761	15.23	0.889	High	8.08	8.32	1.154	23.087	0.8698	Medium	8.08	8.32	1.172	23.434	0.8195	Medium	8.08	8.32	1.13	22.608	0.9017	High	8.08	8.32	2.379	47.584	0.8852	Medium	8.08
Gedatolisib	158	173	IGYDVTDVSNVHDDEL	10.34	2	14	10.26	10.33	3.43	24.498	0.9187	High	10.25	10.33	3.076	21.97	0.9201	High	10.26	10.33	3.439	24.561	0.9171	High	10.26	10.33	4.743	33.878	0.8964	High	10.26	10.33	5.053	36.094	0.8669	Medium	10.26	10.33	4.632	33.084	0.916	High	10.26	10.33	6.354	45.385	0.8914	Medium	10.26
Gedatolisib	158	174	IGYDVTDVSNVHDDELE	9.9	2	15	9.86	9.93	3.492	23.279	0.9085	High	9.86	9.93	2.95	19.665	0.9019	High	9.86	9.93	3.458	23.055	0.9252	High	9.86	9.93	4.678	31.188	0.8941	Medium	9.86	9.93	4.912	32.75	0.8796	Medium	9.86	9.93	4.636	30.904	0.9181	High	9.86	9.93	6.614	44.097	0.9117	High	9.86
Gedatolisib	161	174	DVTDVSNVHDDELE	8.32	2	12	8.48	8.55	3.325	27.705	0.8803	Medium	8.48	8.56	3.245	27.042	0.7654	Medium	8.52	8.62	3.247	27.06	0.8976	High	8.22	8.62	4.562	38.015	0.904	Medium	8.22	8.62	4.56	37.998	0.9206	High	8.22	8.62	4.423	36.858	0.9237	High	8.22	8.62	5.695	47.459	0.8997	Medium	8.22
Gedatolisib	165	175	VSNVHDDELEF	10.56	2	9	10.44	10.66	1.235	13.718	0.8397	Medium	10.44	10.66	1.118	12.419	0.8185	Medium	10.44	10.66	1.201	13.339	0.8284	Medium	10.44	10.66	2.193	24.369	0.8061	Medium	10.44	10.66	2.197	24.41	0.8204	Medium	10.44	10.66	2.177	24.184	0.8409	Medium	10.44	10.66	2.84	31.554	0.8548	Medium	10.44
Gedatolisib	174	182	EFTRRGLVT	7.02	2	7	6.99	7.08	0.188	2.687	0.9472	High	6.99	7.08	0.177	2.53	0.9432	High	6.99	7.08	0.178	2.55	0.9547	High	6.99	7.08	0.305	4.357	0.9381	High	6.99	7.08	0.278	3.967	0.9435	Medium	6.99	7.08	0.268	3.822	0.9014	High	6.99	7.08	0.624	8.921	0.9577	High	6.99
Gedatolisib	174	185	EFTRRGLVTPRM	7.96	3	9	7.82	8.06	0.125	1.386	0.8551	Medium	7.82	8.06	0.228	2.536	0.9093	Medium	7.82	8.06	0.183	2.034	0.912	Medium	7.82	8.06	0.168	1.872	0.834	Medium	7.82	8.06	0.266	2.957	0.8492	Medium	7.82	8.06	0.247	2.741	0.9133	Medium	7.82	8.06	0.621	6.903	0.8928	Medium	7.82
Gedatolisib	174	187	EFTRRGLVTPRMAE	7.6	2	11	7.66	7.74	0.268	2.433	0.8298	Medium	7.63	7.7	0.326	2.966	0.8471	Medium	7.54	7.63	0.301	2.74	0.7082	Medium	7.69	7.76	0.283	2.572	0.8486	Medium	7.67	7.75	0.398	3.616	0.8632	Medium	7.55	7.63	0.434	3.946	0.7441	Medium	7.54	7.63	0.968	8.803	0.8567	Medium	7.69
Gedatolisib	174	195	EFTRRGLVTPRMAEVASRDPKL	8.28	5	18	8.13	8.45	1.076	5.976	0.8705	Medium	8.13	8.45	0.981	5.452	0.8996	Medium	8.13	8.45	1.13	6.277	0.9059	Medium	8.13	8.45	1.796	9.977	0.819	Medium	8.13	8.45	2.057	11.425	0.8324	Medium	8.13	8.45	1.814	10.078	0.8845	Medium	8.13	8.45	3.473	19.295	0.8201	Medium	8.13
Gedatolisib	175	182	FTRRGLVT	6.2	2	6	6.13	6.34	0.189	3.149	0.8973	Medium	6.13	6.34	0.204	3.408	0.8861	Medium	6.13	6.34	0.175	2.925	0.9126	Medium	6.13	6.34	0.308	5.139	0.8584	Medium	6.13	6.34	0.273	4.548	0.883	Medium	6.13	6.34	0.25	4.169	0.9056	Medium	6.13	6.34	0.657	10.947	0.9151	Medium	6.13
Gedatolisib	176	182	TRRGLVT	4.73	2	5	4.86	4.95	0.18	3.605	0.9421	Medium	4.86	4.95	0.146	2.911	0.9419	Medium	4.86	4.95	0.17	3.395	0.9505	Medium	4.86	4.95	0.261	5.227	0.9424	Medium	4.86	4.95	0.241	4.83	0.9347	Medium	4.86	4.95	0.199	3.972	0.9374	Medium	4.86	4.95	0.633	12.667	0.9421	Medium	4.86
Gedatolisib	176	185	TRRGLVTPRM	6.49	2	7	6.5	6.59	0.205	2.923	0.8455	Medium	6.5	6.59	0.214	3.062	0.8328	Medium	6.5	6.6	0.263	3.761	0.8258	Medium	6.5	6.6	0.301	4.302	0.8708	Medium	6.5	6.6	0.271	3.87	0.8129	Medium	6.5	6.6	0.292	4.174	0.8395	Medium	6.5	6.6	0.671	9.589	0.9165	High	6.5
Gedatolisib	183	195	PRMAEVASRDPKL	6.78	3	10	6.66	6.99	1.193	11.928	0.9038	Medium	6.66	6.99	1.126	11.262	0.8981	Medium	6.66	6.99	1.209	12.092	0.9202	Medium	6.66	6.99	1.889	18.885	0.8867	Medium	6.66	6.99	1.853	18.526	0.9011	Medium	6.66	6.99	1.887	18.872	0.9075	Medium	6.66	6.99	3.132	31.324	0.9043	Medium	6.66
Gedatolisib	186	195	AEVASRDPKL	5.95	2	7	5.87	6.28	1.209	17.266	0.9406	High	5.87	6.28	1.116	15.95	0.9362	High	5.87	6.28	1.197	17.1	0.9481	High	5.87	6.28	1.901	27.155	0.9435	High	5.87	6.28	1.844	26.346	0.9308	High	5.87	6.28	1.865	26.643	0.9243	High	5.87	6.28	2.922	41.749	0.9552	High	5.87
Gedatolisib	188	195	VASRDPKL	5.26	2	5	5.21	5.59	1.222	24.444	0.8174	Medium	5.21	5.59	1.082	21.648	0.8036	Medium	5.21	5.59	1.178	23.555	0.8507	Medium	5.21	5.59	1.809	36.185	0.9014	Medium	5.21	5.59	1.723	34.454	0.9042	Medium	5.21	5.59	1.718	34.368	0.9085	Medium	5.21	5.59	2.489	49.775	0.9111	High	5.21
Gedatolisib	196	211	YAMHPWVTSKPLPEYL	11.65	3	11	11.54	12.1	3.096	28.145	0.9146	High	11.54	12.1	2.989	27.171	0.9045	High	11.54	12.1	2.975	27.049	0.8984	High	11.54	12.1	4.218	38.345	0.9124	High	11.54	12.1	4.2	38.179	0.9213	High	11.54	12.1	4.098	37.251	0.9081	High	11.54	12.1	5.675	51.589	0.9102	High	11.54
Gedatolisib	212	221	WKKIANNCIF	10.39	2	8	10.45	10.52	1.999	24.992	0.9224	High	10.45	10.51	1.894	23.674	0.9262	High	10.45	10.52	1.946	24.325	0.931	High	10.45	10.52	3.232	40.402	0.9333	High	10.45	10.52	3.184	39.806	0.9389	High	10.45	10.52	3.037	37.968	0.9395	High	10.45	10.52	4.801	60.015	0.9231	High	10.45
Gedatolisib	222	232	IVIHRSTTSQT	4.59	2	9	4.76	4.84	3.089	34.327	0.9058	Medium	4.64	4.73	2.887	32.073	0.9374	Medium	4.64	4.73	2.995	33.277	0.9394	Medium	4.64	4.73	3.31	36.776	0.9281	Medium	4.64	4.73	3.312	36.797	0.932	Medium	4.58	4.67	3.213	35.705	0.8594	Medium	4.64	4.73	3.479	38.661	0.9531	Medium	4.64
Gedatolisib	223	233	VIHRSTTSQTI	4.58	3	9	4.55	4.92	3.215	35.727	0.875	Medium	4.55	4.92	3.178	35.31	0.8629	Medium	4.55	4.92	3.189	35.436	0.8751	Medium	4.55	4.93	3.362	37.355	0.8245	Medium	4.55	4.92	3.293	36.591	0.8598	Medium	4.55	4.93	3.15	34.995	0.9132	Medium	4.55	4.93	3.47	38.554	0.9028	Medium	4.55
Gedatolisib	232	245	TIKVSPDDTPGAIL	10.16	2	10	10.12	10.13	1.274	12.737	0.8436	Medium	10.12	10.13	1.282	12.82	0.8832	Medium	10.12	10.13	1.345	13.447	0.8847	Medium	10.12	10.13	2.109	21.09	0.818	Medium	10.12	10.13	2.24	22.395	0.8359	Medium	10.12	10.13	2.077	20.774	0.858	Medium	10.12	10.13	3.096	30.955	0.8073	Medium	10.12
Gedatolisib	233	245	IKVSPDDTPGAIL	9.99	2	9	9.79	10.26	0.901	10.016	0.9123	High	9.78	10.25	0.93	10.337	0.9317	High	9.79	10.26	0.946	10.515	0.9259	High	9.79	10.26	1.293	14.362	0.919	Medium	9.79	10.26	1.338	14.863	0.9328	High	9.79	10.26	1.263	14.033	0.9352	High	9.79	10.26	2.217	24.634	0.925	High	9.79
Gedatolisib	249	269	FTKMAKKKSLMDIPESQSEQD	7.24	4	18	7.57	7.64	9.82	54.556	0.9282	High	7.4	7.48	9.615	53.418	0.9036	High	7.38	7.46	9.818	54.545	0.931	High	7.51	7.6	10.45	58.057	0.8939	High	7.52	7.6	10.616	58.979	0.9186	High	7.37	7.45	10.333	57.406	0.9332	High	7.19	7.74	11.057	61.428	0.9309	High	7.19
Gedatolisib	270	278	FVLRVCGRD	8.8	3	7	8.91	9	0.289	4.125	0.8611	Medium	8.91	9	0.255	3.638	0.8689	Medium	8.91	9	0.251	3.587	0.8917	Medium	8.91	9	0.379	5.418	0.8194	Medium	8.91	9	0.447	6.382	0.8445	Medium	8.91	9	0.306	4.378	0.8969	Medium	8.91	9	0.87	12.431	0.894	Medium	8.91
Gedatolisib	270	281	FVLRVCGRDEYL	11.08	3	10	11.1	11.21	0.236	2.362	0.8087	Medium	11.1	11.2	0.192	1.917	0.9147	Medium	11.1	11.2	0.181	1.81	0.9152	Medium	11.11	11.21	0.288	2.882	0.7713	Medium	11.1	11.2	0.402	4.016	0.6774	Medium	11.11	11.21	0.285	2.846	0.9049	Medium	11.1	11.2	0.779	7.791	0.8841	Medium	11.1
Gedatolisib	282	291	VGETPIKNFQ	8	1	7	8	8.09	0.667	9.534	0.9079	Medium	8	8.09	0.622	8.883	0.911	High	8	8.09	0.7	10.003	0.8897	Medium	8	8.09	0.655	9.36	0.8675	Medium	8	8.09	0.688	9.832	0.8689	Medium	8	8.09	0.727	10.384	0.8915	Medium	8	8.09	0.745	10.638	0.9203	High	8
Gedatolisib	282	291	VGETPIKNFQ	8	2	7	7.84	8.35	0.66	9.424	0.9031	High	7.84	8.35	0.654	9.349	0.9241	High	7.84	8.35	0.691	9.873	0.8922	Medium	7.84	8.35	0.663	9.475	0.9273	High	7.84	8.35	0.636	9.083	0.9263	High	7.84	8.35	0.687	9.821	0.9215	High	7.84	8.35	0.708	10.112	0.9203	High	7.84
Gedatolisib	282	307	VGETPIKNFQWVRHCLKNGEEIHVVL	11.24	4	23	11.26	11.35	1.333	5.794	0.8416	Medium	11.25	11.35	1.046	4.547	0.8753	Medium	11.25	11.35	1.172	5.095	0.9077	Medium	11.26	11.35	3.208	13.948	0.7806	Medium	11.34	11.41	3.49	15.172	0.8545	Medium	11.26	11.35	3.185	13.85	0.898	Medium	11.26	11.35	5.003	21.753	0.8657	Medium	11.25
Gedatolisib	292	302	WVRHCLKNGEE	5.33	3	9	5.45	5.56	0.698	7.76	0.9445	High	5.45	5.56	0.594	6.6	0.927	High	5.45	5.56	0.702	7.796	0.902	High	5.45	5.56	2.069	22.984	0.9112	Medium	5.45	5.56	1.992	22.139	0.9507	High	5.45	5.56	1.9	21.109	0.9495	High	5.45	5.56	2.274	25.267	0.957	High	5.45
Gedatolisib	292	307	WVRHCLKNGEEIHVVL	8.82	4	14	8.75	9.25	0.76	5.427	0.8792	Medium	8.75	9.25	0.566	4.044	0.9164	Medium	8.75	9.25	0.714	5.099	0.9178	Medium	8.75	9.25	2.462	17.583	0.8554	Medium	8.75	9.25	2.519	17.996	0.8755	Medium	8.75	9.25	2.044	14.601	0.9189	Medium	8.75	9.25	3.493	24.951	0.838	Medium	8.75
Gedatolisib	308	315	DTPPDPAL	8.37	1	3	8.36	8.44	0.63	20.989	0.9009	Medium	8.36	8.44	0.603	20.099	0.9008	Medium	8.36	8.44	0.687	22.902	0.901	Medium	8.36	8.44	1.354	45.121	0.9018	Medium	8.36	8.44	1.358	45.266	0.902	Medium	8.36	8.44	1.354	45.145	0.903	Medium	8.36	8.44	1.682	56.078	0.8861	Medium	8.36
Gedatolisib	316	335	DEVRKEEWPLVDDCTGVTGY	12.39	2	17	12.29	12.63	7.993	47.018	0.8705	Medium	12.29	12.63	7.769	45.699	0.7315	Medium	12.29	12.63	7.589	44.64	0.852	Medium	12.29	12.63	8.603	50.606	0.8989	Medium	12.29	12.63	8.719	51.291	0.8456	Medium	12.29	12.63	8.441	49.653	0.8264	Medium	12.29	12.63	9.751	57.357	0.9256	High	12.29
Gedatolisib	316	339	DEVRKEEWPLVDDCTGVTGYHEQL	11.9	3	21	11.96	12.03	9.002	42.869	0.8124	Medium	11.96	12.03	9.205	43.834	0.7565	Medium	11.96	12.03	8.8	41.903	0.8668	Medium	11.96	12.03	10.193	48.54	0.7956	Medium	11.96	12.03	10.176	48.457	0.8612	Medium	11.99	12.06	10.005	47.641	0.7553	Medium	11.96	12.03	10.968	52.226	0.7762	Medium	11.96
Gedatolisib	328	339	DCTGVTGYHEQL	8.95	2	10	8.78	9.03	6.424	64.244	0.8149	Medium	8.78	9.03	6.425	64.247	0.8411	Medium	8.78	9.03	6.354	63.542	0.8665	Medium	8.78	9.03	6.752	67.518	0.8215	Medium	8.78	9.03	6.693	66.933	0.8372	Medium	8.78	9.03	6.544	65.44	0.8712	Medium	8.8	8.88	6.792	67.917	0.8468	Medium	8.78
Gedatolisib	336	350	HEQLTIHGKDHESVF	7.44	3	13	7.38	7.85	5.353	41.177	0.8366	Medium	7.38	7.85	4.313	33.179	0.8949	Medium	7.38	7.85	4.536	34.89	0.9027	Medium	7.38	7.86	5.173	39.79	0.8252	Medium	7.38	7.86	5.625	43.272	0.8083	Medium	7.38	7.86	4.532	34.861	0.9012	Medium	7.38	7.86	5.577	42.899	0.8676	Medium	7.38
Gedatolisib	340	350	TIHGKDHESVF	6.75	2	9	6.75	6.86	2.51	27.885	0.9122	High	6.75	6.85	2.311	25.683	0.8859	High	6.76	6.86	2.353	26.15	0.9078	High	6.76	6.86	2.547	28.295	0.9075	Medium	6.76	6.86	2.447	27.19	0.9047	High	6.76	6.86	2.403	26.697	0.9074	High	6.76	6.86	2.495	27.719	0.9272	High	6.76
Gedatolisib	355	379	WDCDRKFRVKIRGIDIPVLPRNTDL	10.43	5	21	10.59	10.68	3.303	15.73	0.7781	Medium	10.59	10.68	3.044	14.494	0.8114	Medium	10.59	10.68	3.14	14.952	0.8105	Medium	10.59	10.69	4.268	20.323	0.7526	Medium	10.59	10.68	4.483	21.348	0.7046	Medium	10.59	10.69	4.137	19.701	0.8339	Medium	10.59	10.68	6.038	28.755	0.9116	Medium	10.59
Gedatolisib	370	379	IPVLPRNTDL	9.61	2	7	9.53	9.62	3.871	55.305	0.7879	Medium	9.53	9.62	3.776	53.937	0.7688	Medium	9.53	9.62	3.96	56.575	0.8309	Medium	9.54	9.61	4.467	63.821	0.6559	Medium	9.58	9.66	4.46	63.72	0.7872	Medium	9.46	9.54	4.434	63.338	0.6162	Medium	9.53	9.62	5.474	78.206	0.918	Medium	9.53
Gedatolisib	382	394	FVEANIQHGQQVL	9.08	2	11	8.98	9.37	1.238	11.258	0.8651	Medium	8.98	9.37	1.112	10.113	0.9216	High	8.98	9.37	1.336	12.147	0.9156	Medium	8.98	9.38	1.965	17.86	0.8212	Medium	8.98	9.38	2.017	18.34	0.8352	Medium	8.98	9.38	2.144	19.489	0.8848	Medium	8.98	9.38	2.37	21.543	0.9106	High	8.98
Gedatolisib	383	394	VEANIQHGQQVL	7.88	2	10	7.72	8.3	1.242	12.415	0.8558	Medium	7.72	8.3	1.098	10.98	0.8916	Medium	7.72	8.3	1.299	12.989	0.8991	Medium	7.72	8.3	1.83	18.301	0.8118	Medium	7.72	8.3	1.894	18.945	0.8155	Medium	7.72	8.3	2.071	20.712	0.8686	Medium	7.72	8.3	2.493	24.934	0.9277	High	7.72
Gedatolisib	395	407	CQRRTSPKPFTEE	5.48	3	9	5.45	5.98	1.148	12.756	0.8207	Medium	5.45	5.98	0.935	10.388	0.8661	Medium	5.45	5.98	1.037	11.518	0.8825	Medium	5.45	5.98	1.766	19.621	0.8282	Medium	5.45	5.98	1.757	19.528	0.8153	Medium	5.45	5.98	1.744	19.379	0.8843	Medium	5.45	5.98	2.827	31.408	0.9516	High	5.45
Gedatolisib	417	428	SIKIKDLPKGAL	8.16	2	9	8.2	8.29	0.324	3.598	0.9278	Medium	8.2	8.29	0.27	2.996	0.9215	Medium	8.2	8.29	0.33	3.663	0.9311	Medium	8.2	8.29	0.884	9.821	0.9102	Medium	8.2	8.29	0.931	10.34	0.9345	Medium	8.2	8.29	0.937	10.407	0.9007	Medium	8.2	8.29	1.963	21.817	0.9412	High	8.2
Gedatolisib	463	468	YVNLLL	13.37	1	4	13.32	13.41	0.129	3.222	0.5539	Medium	13.38	13.46	0.197	4.914	0.5951	Medium	13.4	13.47	0.178	4.46	0.6239	Medium	13.37	13.44	0.181	4.535	0.5561	Medium	13.4	13.48	0.212	5.304	0.5671	Medium	13.39	13.47	0.169	4.233	0.6097	Medium	13.32	13.41	0.37	9.24	0.8648	Medium	13.32
Gedatolisib	467	479	LLIDHRFLLRRGE	8.97	4	11	9.03	9.13	0.645	5.864	0.8718	Medium	9.03	9.13	0.569	5.176	0.8907	Medium	9.03	9.13	0.681	6.189	0.9064	Medium	9.03	9.13	1.495	13.594	0.8006	Medium	9.03	9.13	1.697	15.423	0.7511	Medium	9.03	9.13	1.558	14.165	0.8822	Medium	9.03	9.13	2.57	23.361	0.9343	High	9.03
Gedatolisib	467	480	LLIDHRFLLRRGEY	9.61	4	12	9.58	9.66	0.692	5.77	0.9235	High	9.58	9.66	0.584	4.863	0.9013	Medium	9.58	9.66	0.65	5.417	0.9115	Medium	9.59	9.66	1.749	14.576	0.8876	Medium	9.58	9.66	1.727	14.388	0.91	Medium	9.59	9.66	1.551	12.929	0.9054	Medium	9.59	9.66	2.61	21.754	0.9405	High	9.58
Gedatolisib	485	497	WQISGKGEDQGSF	9.72	2	11	9.88	9.95	6.439	58.533	0.8061	Medium	9.88	9.94	5.704	51.857	0.8753	Medium	9.88	9.95	6.237	56.702	0.9064	Medium	9.86	9.94	6.987	63.515	0.7158	Medium	9.88	9.95	6.903	62.755	0.836	Medium	9.88	9.95	5.976	54.332	0.8786	Medium	9.88	9.95	7.886	71.692	0.8915	Medium	9.92
Gedatolisib	498	515	NADKLTSATNPDKENSMS	6	3	15	5.75	6.45	2.697	17.982	0.8662	Medium	5.75	6.45	2.447	16.315	0.9123	Medium	5.75	6.45	2.754	18.363	0.9134	High	5.75	6.45	4.589	30.592	0.8316	Medium	5.75	6.45	4.375	29.168	0.8378	Medium	5.75	6.45	4.454	29.694	0.8908	Medium	5.75	6.45	6.699	44.662	0.9192	High	5.75
Gedatolisib	498	517	NADKLTSATNPDKENSMSIS	7.37	3	17	7.22	7.54	2.746	16.154	0.5561	Medium	7.22	7.54	2.286	13.449	0.6461	Medium	7.22	7.54	2.471	14.536	0.7495	Medium	7.22	7.55	4.028	23.694	0.5582	Medium	7.22	7.55	4.431	26.064	0.5797	Medium	7.22	7.55	4.146	24.39	0.6476	Medium	7.22	7.54	6.491	38.182	0.7997	Medium	7.22
Gedatolisib	520	551	LDNYCHPIALPKHQPTPDPEGDRVRAEMPNQL	8.81	4	24	8.61	9.31	11.759	48.997	0.8483	Medium	8.61	9.31	11.72	48.833	0.8881	High	8.61	9.31	11.929	49.706	0.9197	High	8.61	9.31	13.542	56.423	0.8072	Medium	8.61	9.31	13.561	56.506	0.8439	Medium	8.61	9.31	13.256	55.234	0.8925	High	8.61	9.31	14.116	58.818	0.9277	High	8.61
Gedatolisib	523	551	YCHPIALPKHQPTPDPEGDRVRAEMPNQL	8.37	5	21	8.39	8.48	10.492	49.963	0.6399	Medium	8.33	8.48	10.293	49.016	0.7928	Medium	8.17	8.63	10.567	50.318	0.7666	Medium	8.44	8.53	12.363	58.873	0.5607	Medium	8.43	8.52	12.413	59.107	0.6871	Medium	8.35	8.44	11.975	57.025	0.7693	Medium	8.17	8.63	12.666	60.315	0.8252	Medium	8.17
Gedatolisib	557	573	AIIATDPLNPLTAEDKE	10.7	2	13	10.64	10.73	5.013	38.565	0.8748	High	10.64	10.73	5.014	38.571	0.9084	High	10.64	10.73	4.972	38.249	0.9016	High	10.64	10.74	7.835	60.272	0.8365	Medium	10.64	10.73	7.977	61.362	0.8437	Medium	10.64	10.74	8.011	61.62	0.9115	High	10.64	10.73	9.705	74.654	0.9025	High	10.64
Gedatolisib	557	578	AIIATDPLNPLTAEDKELLWHF	13.73	3	18	13.67	13.77	4.817	26.761	0.7621	Medium	13.72	13.79	4.645	25.804	0.7047	Medium	13.67	13.76	4.925	27.362	0.6984	Medium	13.73	13.8	9.581	53.227	0.7688	Medium	13.78	13.86	9.343	51.904	0.7724	Medium	13.67	13.76	9.102	50.569	0.7226	Medium	13.67	13.76	12.623	70.129	0.8649	Medium	13.67
Gedatolisib	558	571	IIATDPLNPLTAED	11.47	1	10	11.41	11.51	4.48	44.801	0.7268	Medium	11.41	11.51	4.509	45.09	0.7288	Medium	11.41	11.51	4.435	44.353	0.7336	Medium	11.42	11.51	6.406	64.059	0.7605	Medium	11.51	11.58	6.372	63.719	0.7457	Medium	11.42	11.51	6.434	64.342	0.7343	Medium	11.41	11.51	7.396	73.964	0.8322	Medium	11.41
Gedatolisib	558	573	IIATDPLNPLTAEDKE	10.38	2	12	10.49	10.58	4.7	39.17	0.807	Medium	10.49	10.57	4.851	40.426	0.8153	Medium	10.49	10.57	5.025	41.876	0.7939	Medium	10.49	10.58	7.24	60.333	0.773	Medium	10.49	10.58	7.324	61.037	0.8188	Medium	10.49	10.58	7.419	61.828	0.8206	Medium	10.49	10.58	8.63	71.917	0.8121	Medium	10.49
Gedatolisib	558	578	IIATDPLNPLTAEDKELLWHF	13.68	3	17	13.49	13.96	4.75	27.94	0.919	High	13.49	13.95	4.757	27.981	0.8496	Medium	13.49	13.96	4.757	27.981	0.8923	Medium	13.49	13.96	8.465	49.795	0.8801	Medium	13.49	13.96	8.377	49.279	0.8966	Medium	13.49	13.96	8.421	49.536	0.8788	Medium	13.49	13.96	11.401	67.065	0.9157	High	13.49
Gedatolisib	559	573	IATDPLNPLTAEDKE	9.92	2	11	9.87	9.9	4.902	44.561	0.7016	Medium	9.87	9.89	4.781	43.466	0.7324	Medium	9.87	9.89	4.793	43.577	0.7338	Medium	9.87	9.9	7.485	68.049	0.618	Medium	9.87	9.9	7.185	65.322	0.6339	Medium	9.87	9.9	7.167	65.158	0.7308	Medium	9.87	9.9	8.152	74.11	0.7204	Medium	9.87
Gedatolisib	574	578	LLWHF	13.11	2	3	13.1	13.18	0.429	14.297	0.9277	High	13.1	13.17	0.424	14.128	0.9225	High	13.1	13.18	0.441	14.708	0.904	High	13.1	13.18	1.062	35.408	0.9196	High	13.18	13.26	1.112	37.052	0.9454	High	13.1	13.18	1.109	36.961	0.9275	High	13.1	13.18	1.746	58.206	0.9285	High	13.1
Gedatolisib	579	592	RYESLKHPKAYPKL	6.32	4	10	6.48	6.57	2.406	24.059	0.8796	Medium	6.37	6.47	2.347	23.472	0.8957	Medium	6.37	6.47	2.399	23.991	0.9083	Medium	6.37	6.47	4.593	45.932	0.8723	Medium	6.37	6.47	4.578	45.776	0.8714	Medium	6.4	6.48	4.401	44.01	0.8416	Medium	6.37	6.47	5.378	53.78	0.8713	Medium	6.37
Gedatolisib	602	607	EIVAKT	4.54	1	4	4.62	4.69	1.115	27.864	0.8667	Medium	4.6	4.69	1.066	26.66	0.8263	Medium	4.6	4.69	1.196	29.893	0.9249	Medium	4.66	4.73	2.442	61.046	0.9207	Medium	4.68	4.76	2.524	63.108	0.8835	Medium	4.6	4.69	2.493	62.337	0.9353	Medium	4.6	4.69	3.417	85.431	0.9144	Medium	4.6
Gedatolisib	611	622	LARREVWDQSAL	9.4	2	10	9.33	9.42	6.116	61.156	0.9082	Medium	9.37	9.45	5.937	59.371	0.8813	Medium	9.33	9.42	6.142	61.418	0.9001	Medium	9.33	9.43	6.643	66.427	0.9051	Medium	9.33	9.43	6.777	67.767	0.8917	Medium	9.33	9.43	6.598	65.977	0.9017	Medium	9.33	9.43	6.748	67.478	0.9126	High	9.33
Gedatolisib	612	622	ARREVWDQSAL	9.08	3	9	9.13	9.22	5.765	64.051	0.9329	High	9.13	9.22	5.643	62.704	0.9035	High	9.13	9.22	5.743	63.811	0.9061	High	9.13	9.22	6.039	67.1	0.9211	Medium	9.13	9.22	6.102	67.799	0.9032	High	9.13	9.22	6.047	67.192	0.9232	High	9.13	9.22	6.022	66.914	0.9443	High	9.13
Gedatolisib	623	630	DVGLTMQL	11.91	2	6	12.21	12.28	1.034	17.233	0.861	Medium	12.11	12.18	0.799	13.309	0.886	Medium	12.11	12.19	0.844	14.059	0.9227	Medium	12.16	12.24	2.322	38.698	0.728	Medium	12.22	12.3	2.333	38.891	0.8099	Medium	12.11	12.19	2.165	36.076	0.8543	Medium	12.11	12.19	4.163	69.383	0.8497	Medium	12.11
Gedatolisib	631	635	LDCNF	10.64	1	3	10.68	10.77	0.555	18.507	0.9006	Medium	10.68	10.77	0.544	18.126	0.9094	Medium	10.68	10.77	0.597	19.905	0.9096	Medium	10.69	10.77	1.308	43.599	0.9323	Medium	10.74	10.82	1.369	45.627	0.9246	Medium	10.69	10.77	1.366	45.519	0.9318	Medium	10.68	10.77	2.021	67.356	0.9137	Medium	10.74
Gedatolisib	636	642	SDENVRA	4.34	1	5	4.36	4.39	0.982	19.634	0.8306	Medium	4.36	4.39	0.845	16.907	0.8456	Medium	4.36	4.39	0.903	18.068	0.879	Medium	4.41	4.45	1.445	28.91	0.8345	Medium	4.4	4.45	1.536	30.718	0.8139	Medium	4.36	4.4	1.543	30.859	0.8742	Medium	4.36	4.4	2.645	52.892	0.8999	Medium	4.36
Gedatolisib	643	650	IAVQKLES	6.86	1	6	6.85	6.86	0.818	13.632	0.8001	Medium	6.85	6.86	0.762	12.693	0.7385	Medium	6.85	6.86	0.747	12.45	0.817	Medium	6.85	6.87	1.013	16.878	0.6902	Medium	6.85	6.86	1.129	18.811	0.7158	Medium	6.85	6.87	1.045	17.411	0.8086	Medium	6.85	6.86	1.829	30.487	0.7627	Medium	6.85
Gedatolisib	643	651	IAVQKLESL	9.62	1	7	9.43	9.8	0.79	11.281	0.8395	Medium	9.43	9.8	0.813	11.609	0.8693	Medium	9.43	9.8	0.824	11.765	0.9131	Medium	9.43	9.8	0.925	13.214	0.815	Medium	9.43	9.8	1.05	14.993	0.8341	Medium	9.43	9.8	1.089	15.557	0.8695	Medium	9.43	9.8	1.959	27.99	0.8548	Medium	9.43
Gedatolisib	643	654	IAVQKLESLEDD	9.34	2	10	9.27	9.35	1.623	16.229	0.8728	Medium	9.26	9.35	1.623	16.231	0.9109	Medium	9.26	9.35	1.736	17.356	0.906	Medium	9.27	9.35	2.355	23.545	0.8541	Medium	9.35	9.43	2.397	23.966	0.873	Medium	9.27	9.35	2.395	23.947	0.8853	Medium	9.27	9.35	3.422	34.224	0.8896	Medium	9.27
Gedatolisib	643	657	IAVQKLESLEDDDVL	11.41	2	13	11.21	11.5	1.842	14.17	0.8069	Medium	11.21	11.5	1.606	12.356	0.8088	Medium	11.21	11.5	1.677	12.897	0.8282	Medium	11.21	11.5	2.514	19.335	0.7925	Medium	11.21	11.5	2.489	19.144	0.7773	Medium	11.21	11.5	2.462	18.936	0.7887	Medium	11.21	11.5	3.884	29.876	0.799	Medium	11.21
Gedatolisib	652	657	EDDDVL	9.03	1	4	9.09	9.17	0.14	3.503	0.8018	Medium	9.19	9.26	0.227	5.674	0.8255	Medium	9.09	9.17	0.166	4.16	0.8158	Medium	9.09	9.17	0.29	7.259	0.7747	Medium	9.09	9.17	0.337	8.432	0.803	Medium	9.09	9.17	0.368	9.194	0.8608	Medium	9.09	9.17	0.795	19.884	0.8725	Medium	9.09
Gedatolisib	654	662	DDVLHYLLQ	12.91	2	7	12.91	13.02	0.145	2.069	0.7092	Medium	12.91	13.02	0.121	1.728	0.7368	Medium	12.91	13.02	0.111	1.59	0.7903	Medium	12.92	12.99	0.343	4.906	0.643	Medium	12.91	13.02	0.43	6.14	0.66	Medium	13.01	13.09	0.322	4.595	0.6844	Medium	12.91	13.02	1.536	21.949	0.7357	Medium	12.91
Gedatolisib	655	662	DVLHYLLQ	12.82	2	6	12.59	12.95	0.089	1.477	0.7598	Medium	12.59	12.95	0.108	1.795	0.762	Medium	12.59	12.95	0.098	1.626	0.8107	Medium	12.59	12.95	0.36	6.006	0.6218	Medium	12.59	12.95	0.319	5.314	0.7235	Medium	12.59	12.95	0.367	6.125	0.7432	Medium	12.59	12.95	1.642	27.369	0.8245	Medium	12.59
Gedatolisib	655	663	DVLHYLLQL	14.29	2	7	14.18	14.53	0.131	1.871	0.9054	Medium	14.17	14.52	0.135	1.926	0.8837	Medium	14.18	14.53	0.097	1.391	0.8956	Medium	14.18	14.53	0.453	6.478	0.8602	Medium	14.18	14.53	0.414	5.921	0.8808	Medium	14.18	14.53	0.416	5.94	0.8635	Medium	14.17	14.53	1.714	24.48	0.9405	Medium	14.18
Gedatolisib	658	665	HYLLQLVQ	11.67	2	6	11.66	11.68	0.032	0.536	0.683	Medium	11.66	11.68	0.076	1.269	0.7701	Medium	11.66	11.68	0.078	1.304	0.8281	Medium	11.66	11.68	0.158	2.627	0.5881	Medium	11.66	11.68	0.068	1.133	0.66	Medium	11.66	11.68	0.266	4.428	0.786	Medium	11.66	11.68	0.596	9.941	0.6614	Medium	11.66
Gedatolisib	663	677	LVQAVKFEPYHDSAL	9.66	3	12	9.66	9.75	0.413	3.439	0.9308	High	9.66	9.75	0.423	3.529	0.9126	High	9.66	9.75	0.434	3.618	0.9082	High	9.66	9.75	0.827	6.888	0.9178	High	9.66	9.75	0.835	6.961	0.9092	Medium	9.66	9.75	0.817	6.804	0.9273	High	9.66	9.75	1.029	8.574	0.9262	High	9.66
Gedatolisib	664	677	VQAVKFEPYHDSAL	9.26	2	11	9.11	9.53	0.421	3.831	0.9255	Medium	9.11	9.52	0.376	3.417	0.9167	Medium	9.11	9.53	0.423	3.848	0.9346	Medium	9.12	9.53	0.82	7.457	0.9157	Medium	9.11	9.53	0.833	7.573	0.9249	Medium	9.12	9.53	0.839	7.63	0.9276	Medium	9.12	9.53	0.994	9.037	0.9139	Medium	9.11
Gedatolisib	666	677	AVKFEPYHDSAL	8.87	2	9	8.86	8.95	0.405	4.499	0.8257	Medium	8.86	8.95	0.36	3.996	0.7547	Medium	8.86	8.95	0.475	5.279	0.8104	Medium	8.86	8.96	0.849	9.439	0.8149	Medium	8.86	8.96	0.899	9.991	0.8211	Medium	8.86	8.96	0.875	9.721	0.8473	Medium	8.86	8.96	1.001	11.126	0.9041	Medium	8.86
Gedatolisib	681	697	LLKRGLRNKRIGHFLFW	10.27	5	15	10.49	10.58	0.058	0.388	0.9435	High	10.49	10.58	0.05	0.336	0.9435	Medium	10.49	10.58	0.029	0.196	0.9555	High	10.49	10.59	0.099	0.658	0.9308	High	10.49	10.58	0.076	0.504	0.9365	High	10.49	10.58	0.056	0.373	0.9182	High	10.49	10.58	0.244	1.628	0.95	High	10.49
Gedatolisib	698	713	FLRSEIAQSRHYQQRF	7.69	4	14	7.52	7.93	0.722	5.161	0.8923	Medium	7.52	7.93	0.624	4.458	0.8837	Medium	7.52	7.93	0.662	4.732	0.875	Medium	7.52	7.93	1.247	8.908	0.875	Medium	7.52	7.93	1.341	9.581	0.8727	Medium	7.52	7.93	1.193	8.519	0.8689	Medium	7.52	7.93	2.754	19.669	0.894	Medium	7.52
Gedatolisib	700	713	RSEIAQSRHYQQRF	5.79	4	12	5.94	6.02	0.638	5.321	0.9571	High	5.77	6.29	0.429	3.573	0.9338	High	5.77	6.29	0.446	3.719	0.929	High	5.77	6.29	1.144	9.533	0.9201	High	5.77	6.29	1.111	9.26	0.9232	High	5.78	5.89	0.971	8.088	0.8607	High	5.77	6.29	2.492	20.767	0.9229	High	5.77
Gedatolisib	714	719	AVILEA	9.26	1	4	9.19	9.33	0.042	1.039	0.8724	Medium	9.19	9.33	0.041	1.034	0.8732	Medium	9.19	9.33	0.015	0.38	0.8835	Medium	9.19	9.33	0.031	0.764	0.8882	Medium	9.19	9.33	0.032	0.799	0.902	Medium	9.19	9.33	0.037	0.928	0.837	Medium	9.19	9.33	0.028	0.696	0.779	Medium	9.19
Gedatolisib	720	729	YLRGCGTAML	9.99	2	8	10.04	10.1	0.19	2.369	0.8717	Medium	10.04	10.1	0.181	2.258	0.9134	Medium	10.04	10.1	0.186	2.322	0.9031	Medium	10.04	10.1	0.605	7.564	0.8817	Medium	10.04	10.1	0.695	8.689	0.8972	Medium	10.04	10.1	0.58	7.254	0.9206	Medium	10.04	10.1	1.364	17.047	0.8889	Medium	10.04
Gedatolisib	729	737	LHDFTQQVQ	7.59	2	7	7.46	7.65	0.1	1.424	0.8375	Medium	7.46	7.65	0.104	1.491	0.8302	Medium	7.46	7.65	0.084	1.203	0.8514	Medium	7.46	7.65	0.111	1.586	0.8517	Medium	7.46	7.65	0.102	1.455	0.8221	Medium	7.46	7.66	0.117	1.672	0.8473	Medium	7.46	7.65	0.148	2.109	0.8239	Medium	7.46
Gedatolisib	732	737	FTQQVQ	5.63	1	4	5.57	5.69	0.117	2.932	0.8562	Medium	5.57	5.69	0.108	2.706	0.8183	Medium	5.57	5.69	0.074	1.846	0.852	Medium	5.57	5.69	0.077	1.922	0.8364	Medium	5.57	5.69	0.033	0.832	0.8264	Medium	5.57	5.69	0.048	1.193	0.851	Medium	5.57	5.69	0.073	1.837	0.8821	Medium	5.57
Gedatolisib	732	738	FTQQVQV	8.12	1	5	8.26	8.33	0.037	0.746	0.821	Medium	8.17	8.26	0.07	1.394	0.8923	Medium	8.24	8.32	0.054	1.087	0.9028	Medium	8.18	8.26	0.208	4.15	0.7374	Medium	8.23	8.3	0.081	1.617	0.7882	Medium	8.18	8.26	0.084	1.685	0.825	Medium	8.17	8.26	0.118	2.364	0.8196	Medium	8.23
Gedatolisib	742	747	LQKVTL	8.23	1	4	8.2	8.33	0.33	8.252	0.9394	Medium	8.2	8.33	0.289	7.236	0.9406	Medium	8.2	8.33	0.336	8.407	0.9488	Medium	8.2	8.33	1.183	29.566	0.9293	Medium	8.2	8.33	1.214	30.344	0.9425	Medium	8.2	8.34	1.176	29.399	0.9474	Medium	8.2	8.33	2.214	55.344	0.9415	Medium	8.2
Gedatolisib	748	761	DIKSLSAEKYDVSS	8	2	12	7.87	8.2	9.475	78.956	0.8653	Medium	7.87	8.2	9.569	79.742	0.9007	High	7.87	8.2	9.359	77.99	0.9159	High	7.87	8.2	9.563	79.689	0.8517	Medium	7.87	8.2	10.003	83.357	0.8527	Medium	7.87	8.2	9.558	79.654	0.9041	High	7.87	8.2	9.65	80.413	0.8923	High	7.87
Gedatolisib	748	767	DIKSLSAEKYDVSSQVISQL	11.14	3	18	10.94	11.35	14.147	78.592	0.8585	Medium	10.94	11.35	13.744	76.354	0.8508	Medium	10.94	11.35	13.54	75.225	0.9031	Medium	10.95	11.35	14.199	78.882	0.8291	Medium	10.94	11.35	14.477	80.425	0.873	Medium	10.95	11.35	14.041	78.007	0.8933	Medium	10.94	11.35	14.316	79.533	0.8871	Medium	10.94
Gedatolisib	748	782	DIKSLSAEKYDVSSQVISQLKQKLENLQNSQLPES	12.49	5	32	12.24	12.76	18.57	58.031	0.8597	Medium	12.24	12.76	19.209	60.028	0.8349	Medium	12.24	12.76	18.548	57.963	0.8985	High	12.24	12.76	23.797	74.365	0.8722	Medium	12.24	12.76	23.589	73.716	0.8837	High	12.24	12.76	23.879	74.622	0.87	High	12.24	12.76	25.771	80.536	0.8848	High	12.24
Gedatolisib	755	782	EKYDVSSQVISQLKQKLENLQNSQLPES	12.1	3	25	12.12	12.21	13.425	53.702	0.8075	Medium	12.12	12.21	13.055	52.219	0.7888	Medium	12.12	12.21	13.378	53.511	0.8791	Medium	12.08	12.16	17.838	71.353	0.7489	Medium	12.12	12.21	18.627	74.507	0.8189	Medium	12.12	12.21	18.389	73.558	0.8282	Medium	12.12	12.21	20.402	81.606	0.8538	Medium	12.12
Gedatolisib	762	782	QVISQLKQKLENLQNSQLPES	10.6	2	18	10.42	10.73	8.946	49.698	0.8763	Medium	10.41	10.73	9.081	50.453	0.89	Medium	10.42	10.73	9.086	50.479	0.9193	Medium	10.42	10.74	13.942	77.456	0.7534	Medium	10.42	10.73	14.225	79.03	0.8453	Medium	10.42	10.74	14.044	78.02	0.8798	Medium	10.42	10.73	15.968	88.71	0.8065	Medium	10.42
Gedatolisib	767	782	LKQKLENLQNSQLPES	7.51	2	13	7.36	7.61	4.842	37.245	0.8595	Medium	7.36	7.61	4.692	36.093	0.8983	Medium	7.36	7.61	4.961	38.164	0.8826	Medium	7.36	7.61	8.531	65.624	0.7865	Medium	7.36	7.61	8.435	64.887	0.8139	Medium	7.36	7.61	8.396	64.581	0.8755	Medium	7.36	7.61	10.129	77.917	0.8952	Medium	7.36
Gedatolisib	768	782	KQKLENLQNSQLPES	7.13	2	12	6.96	7.45	4.608	38.399	0.9496	High	6.96	7.45	4.529	37.74	0.9508	High	6.96	7.45	4.68	39.002	0.9532	High	6.97	7.45	7.775	64.792	0.9273	High	6.97	7.45	7.672	63.935	0.9362	High	6.97	7.45	7.759	64.662	0.9319	High	6.97	7.45	9.373	78.107	0.9393	High	6.96
Gedatolisib	783	796	FRVPYDPGLKAGAL	10.16	3	10	10.22	10.31	0.228	2.277	0.893	High	10.22	10.31	0.272	2.721	0.9007	High	10.22	10.31	0.242	2.423	0.8997	High	10.22	10.31	0.418	4.179	0.9181	High	10.22	10.31	0.4	4.004	0.908	High	10.22	10.31	0.421	4.212	0.9124	High	10.22	10.31	1.531	15.307	0.906	High	10.22
Gedatolisib	797	812	AIEKCKVMASKKKPLW	6.81	4	13	6.98	7.07	2.676	20.588	0.9341	Medium	6.98	7.06	2.108	16.214	0.9473	Medium	6.98	7.07	2.163	16.636	0.9523	Medium	6.98	7.07	3.222	24.783	0.9186	Medium	6.98	7.07	3.178	24.447	0.9356	Medium	6.98	7.07	2.682	20.632	0.9368	Medium	6.98	7.07	4.513	34.717	0.8702	Medium	6.98
Gedatolisib	797	815	AIEKCKVMASKKKPLWLEF	10.45	2	16	10.29	10.72	2.191	13.691	0.8841	Medium	10.29	10.72	1.447	9.046	0.9005	Medium	10.3	10.72	1.456	9.098	0.9211	Medium	10.29	10.72	2.84	17.747	0.8557	Medium	10.31	10.72	2.832	17.7	0.8574	Medium	10.29	10.72	1.998	12.486	0.8998	Medium	10.29	10.72	4.326	27.039	0.8747	Medium	10.29
Gedatolisib	802	815	KVMASKKKPLWLEF	10.71	4	11	10.75	10.83	1.025	9.315	0.7961	Medium	10.8	10.88	0.896	8.143	0.8421	Medium	10.86	10.94	0.872	7.929	0.9188	Medium	10.86	10.95	1.68	15.273	0.8127	Medium	10.86	10.94	1.548	14.068	0.8539	Medium	10.95	11.03	1.471	13.377	0.8325	Medium	10.86	10.94	2.042	18.56	0.8824	Medium	10.77
Gedatolisib	816	823	KCADPTAL	7.06	1	5	6.88	7.17	1.22	24.405	0.8945	Medium	6.88	7.17	1.061	21.213	0.9121	Medium	6.88	7.17	1.222	24.439	0.9152	Medium	6.88	7.18	2.686	53.722	0.8754	Medium	6.88	7.18	2.757	55.134	0.8637	Medium	6.88	7.18	2.738	54.753	0.9063	Medium	6.88	7.18	3.704	74.081	0.8673	Medium	6.88
Gedatolisib	816	825	KCADPTALSN	5.74	2	7	5.69	5.78	2.718	38.834	0.9224	Medium	5.76	5.84	2.846	40.654	0.8718	Medium	5.69	5.78	2.735	39.075	0.9376	Medium	5.69	5.78	4.337	61.955	0.8891	Medium	5.69	5.78	4.447	63.524	0.9017	Medium	5.69	5.78	4.379	62.553	0.9154	Medium	5.69	5.78	5.244	74.918	0.9354	Medium	5.69
Gedatolisib	816	829	KCADPTALSNETIG	8.17	2	11	8.01	8.43	4.112	37.379	0.8633	Medium	8.01	8.42	3.815	34.678	0.8979	Medium	8.01	8.43	4.146	37.689	0.9033	Medium	8.02	8.43	5.945	54.043	0.8204	Medium	8.02	8.43	6.277	57.06	0.8291	Medium	8.02	8.43	6.052	55.017	0.8705	Medium	8.02	8.43	7.427	67.516	0.8321	Medium	8.01
Gedatolisib	816	842	KCADPTALSNETIGIIFKHGDDLRQDM	11.89	5	24	12.01	12.08	3.787	15.778	0.9053	High	12.01	12.08	3.686	15.357	0.8894	High	12.01	12.08	3.924	16.35	0.9217	High	12.01	12.08	5.982	24.927	0.8592	High	12.01	12.08	6.216	25.902	0.8892	High	12.01	12.08	5.953	24.806	0.8934	High	12.01	12.08	8.351	34.794	0.8653	Medium	12.01
Gedatolisib	824	829	SNETIG	5.53	1	4	5.62	5.69	1.462	36.547	0.7911	Medium	5.59	5.65	1.405	35.119	0.8448	Medium	5.64	5.71	1.52	38.003	0.8582	Medium	5.54	5.62	2.145	53.637	0.7017	Medium	5.54	5.62	2.119	52.969	0.7289	Medium	5.54	5.62	2.083	52.077	0.8275	Medium	5.54	5.62	2.313	57.821	0.8608	Medium	5.54
Gedatolisib	824	842	SNETIGIIFKHGDDLRQDM	10.75	4	17	10.86	10.94	0.975	5.733	0.8814	Medium	10.86	10.94	0.713	4.194	0.8944	Medium	10.86	10.94	0.786	4.625	0.9153	Medium	10.86	10.95	1.873	11.019	0.8527	Medium	10.86	10.94	1.967	11.568	0.88	Medium	10.86	10.95	1.707	10.044	0.9004	Medium	10.86	10.94	3.381	19.891	0.8167	Medium	10.86
Gedatolisib	844	848	ILQIL	12.17	1	3	12.2	12.29	0.035	1.161	0.9192	Medium	12.2	12.29	0.01	0.347	0.9117	Medium	12.2	12.29	0.005	0.169	0.9048	Medium	12.21	12.29	0.02	0.661	0.9314	Medium	12.2	12.29	0.005	0.162	0.9	Medium	12.2	12.29	0.015	0.512	0.9141	Medium	12.17	12.24	0.013	0.419	0.9284	Medium	12.2
Gedatolisib	849	855	RIMESIW	11.65	2	5	11.6	11.68	0.043	0.855	0.8036	Medium	11.6	11.68	0.026	0.512	0.7224	Medium	11.6	11.68	0.059	1.177	0.7758	Medium	11.56	11.63	0.137	2.738	0.6365	Medium	11.6	11.68	0.147	2.941	0.7347	Medium	11.6	11.68	0.14	2.804	0.7439	Medium	11.6	11.68	0.114	2.282	0.8622	Medium	11.6
Gedatolisib	849	862	RIMESIWETESLDL	13.25	2	12	13.18	13.4	0.497	4.144	0.8306	Medium	13.17	13.39	0.484	4.03	0.8902	Medium	13.18	13.4	0.598	4.985	0.9161	Medium	13.18	13.4	0.944	7.863	0.7672	Medium	13.18	13.4	1.089	9.079	0.7692	Medium	13.18	13.4	0.983	8.191	0.8664	Medium	13.18	13.39	2.216	18.469	0.8409	Medium	13.18
Gedatolisib	853	862	SIWETESLDL	13.27	2	8	13.36	13.42	0.459	5.744	0.8354	Medium	13.36	13.42	0.419	5.235	0.8577	Medium	13.36	13.42	0.386	4.828	0.9032	Medium	13.36	13.42	0.829	10.368	0.7893	Medium	13.36	13.42	0.854	10.674	0.7957	Medium	13.36	13.42	0.766	9.576	0.8742	Medium	13.36	13.42	2.016	25.202	0.8416	Medium	13.36
Gedatolisib	862	878	LCLLPYGCISTGDKIGM	13.06	3	14	12.97	13.06	0.051	0.364	0.6832	Medium	12.97	13.06	0.183	1.311	0.808	Medium	12.97	13.06	0.085	0.604	0.8025	Medium	13.07	13.14	0.504	3.598	0.7082	Medium	13.08	13.16	0.742	5.301	0.7334	Medium	12.97	13.06	0.625	4.468	0.75	Medium	12.97	13.06	1.845	13.18	0.7954	Medium	13.04
Gedatolisib	863	869	CLLPYGC	11.86	1	4	11.78	11.87	0.148	3.695	0.8005	Medium	11.77	11.87	0.119	2.986	0.7586	Medium	11.78	11.87	0.133	3.323	0.7847	Medium	11.75	11.83	0.566	14.146	0.6573	Medium	11.86	11.93	0.553	13.819	0.8184	Medium	11.75	11.83	0.53	13.244	0.709	Medium	11.77	11.87	1.203	30.071	0.7955	Medium	11.78
Gedatolisib	863	878	CLLPYGCISTGDKIGM	12.04	2	13	11.9	12.48	0.536	4.122	0.8939	Medium	11.9	12.48	0.392	3.015	0.9066	Medium	11.9	12.48	0.394	3.034	0.9128	Medium	11.9	12.48	0.96	7.388	0.9078	Medium	11.9	12.48	0.933	7.18	0.9044	Medium	11.9	12.48	0.837	6.437	0.9159	Medium	11.9	12.48	2.33	17.926	0.9048	Medium	11.9
Gedatolisib	863	880	CLLPYGCISTGDKIGMIE	12.38	2	15	12.4	12.49	0.398	2.654	0.8496	Medium	12.39	12.49	0.301	2.004	0.9059	Medium	12.4	12.49	0.303	2.017	0.904	High	12.4	12.49	0.577	3.848	0.8346	Medium	12.4	12.49	0.903	6.021	0.8404	Medium	12.4	12.49	0.783	5.222	0.9007	Medium	12.4	12.49	2.17	14.467	0.8655	Medium	12.4
Gedatolisib	865	878	LPYGCISTGDKIGM	10.57	2	12	10.35	10.73	0.42	3.499	0.6802	Medium	10.35	10.72	0.409	3.41	0.7108	Medium	10.35	10.73	0.447	3.726	0.7307	Medium	10.35	10.73	0.884	7.369	0.6593	Medium	10.35	10.73	0.939	7.821	0.696	Medium	10.35	10.73	0.821	6.846	0.7312	Medium	10.35	10.73	2.039	16.988	0.6792	Medium	10.35
Gedatolisib	879	887	IEIVKDATT	7.08	1	7	7.02	7.39	1.302	18.596	0.9306	Medium	7.02	7.39	1.161	16.58	0.9358	High	7.02	7.39	1.3	18.574	0.925	High	7.03	7.39	2.36	33.716	0.934	Medium	7.02	7.39	2.451	35.012	0.9057	Medium	7.03	7.39	2.343	33.474	0.9193	Medium	7.02	7.39	3.413	48.761	0.9013	Medium	7.02
Gedatolisib	879	889	IEIVKDATTIA	9.23	1	9	9.03	9.3	1.4	15.551	0.9016	Medium	9.03	9.3	1.186	13.181	0.8502	Medium	9.03	9.3	1.424	15.818	0.8836	Medium	9.03	9.3	2.607	28.972	0.8704	Medium	9.03	9.3	2.677	29.743	0.8883	Medium	9.03	9.3	2.606	28.961	0.894	Medium	9.03	9.3	3.674	40.817	0.8947	Medium	9.03
Gedatolisib	881	901	IVKDATTIAKIQQSTVGNTGA	8.37	3	19	8.26	8.55	7.339	38.626	0.8444	Medium	8.26	8.55	7.257	38.194	0.8797	Medium	8.26	8.55	7.215	37.976	0.8916	Medium	8.26	8.55	8.372	44.061	0.8005	Medium	8.26	8.55	8.363	44.018	0.8104	Medium	8.26	8.55	8.097	42.614	0.88	Medium	8.26	8.55	9.267	48.773	0.8519	Medium	8.26
Gedatolisib	888	902	IAKIQQSTVGNTGAF	8.64	2	13	8.53	8.62	6.911	53.164	0.8118	Medium	8.53	8.62	6.739	51.84	0.7976	Medium	8.53	8.62	7.109	54.681	0.8213	Medium	8.54	8.62	7.609	58.528	0.744	Medium	8.54	8.62	7.743	59.564	0.7797	Medium	8.54	8.62	7.704	59.258	0.8611	Medium	8.54	8.62	8.462	65.094	0.8857	Medium	8.54
Gedatolisib	888	907	IAKIQQSTVGNTGAFKDEVL	9.51	3	18	9.55	9.62	7.375	40.97	0.8398	Medium	9.55	9.62	7.259	40.328	0.8828	Medium	9.55	9.62	7.14	39.668	0.8825	Medium	9.55	9.62	8.785	48.806	0.7529	Medium	9.55	9.62	8.544	47.466	0.8201	Medium	9.55	9.62	8.348	46.375	0.8709	Medium	9.55	9.62	9.799	54.439	0.8564	Medium	9.55
Gedatolisib	902	910	FKDEVLNHW	10.1	3	7	9.96	10.28	0.217	3.101	0.834	Medium	9.96	10.28	0.185	2.647	0.8905	Medium	9.96	10.28	0.184	2.636	0.9028	Medium	9.96	10.28	0.364	5.196	0.8069	Medium	9.96	10.28	0.304	4.338	0.8832	Medium	9.96	10.28	0.285	4.071	0.9181	Medium	9.96	10.28	0.889	12.706	0.923	Medium	9.96
Gedatolisib	902	924	FKDEVLNHWLKEKSPTEEKFQAA	9.54	4	20	9.4	9.79	1.663	8.315	0.8304	Medium	9.4	9.78	1.469	7.344	0.8617	Medium	9.4	9.79	1.559	7.794	0.8995	Medium	9.4	9.79	2.684	13.422	0.7745	Medium	9.4	9.79	2.709	13.543	0.8282	Medium	9.4	9.79	2.359	11.793	0.8672	Medium	9.4	9.79	4.146	20.729	0.8249	Medium	9.4
Gedatolisib	908	924	NHWLKEKSPTEEKFQAA	7.08	3	14	7.01	7.23	1.646	11.756	0.7801	Medium	7.01	7.23	1.647	11.764	0.7968	Medium	7.02	7.23	1.541	11.007	0.8623	Medium	7.02	7.23	2.531	18.078	0.7256	Medium	7.02	7.23	2.607	18.625	0.7907	Medium	7.02	7.24	2.392	17.088	0.8351	Medium	7.02	7.23	3.549	25.35	0.8431	Medium	7.02
Gedatolisib	925	934	VERFVYSCAG	9.08	1	8	9.11	9.17	0.07	0.874	0.8864	High	9.1	9.17	0.055	0.688	0.8363	Medium	9.11	9.17	0.119	1.484	0.8876	High	9.11	9.17	0.124	1.555	0.7656	Medium	9.11	9.17	0.151	1.894	0.7948	Medium	9.11	9.17	0.203	2.537	0.8899	High	9.11	9.17	0.147	1.839	0.8792	High	9.11
Gedatolisib	927	934	RFVYSCAG	8.29	1	6	8.29	8.36	0.12	1.993	0.8331	Medium	8.29	8.36	0.033	0.548	0.8938	High	8.29	8.36	0.067	1.123	0.8905	High	8.29	8.36	0.053	0.876	0.7689	Medium	8.29	8.36	0.132	2.197	0.7811	Medium	8.29	8.36	0.066	1.105	0.8796	High	8.29	8.36	0.148	2.463	0.8589	High	8.29
Gedatolisib	935	939	YCVAT	6.8	1	3	6.82	6.91	0.016	0.517	0.916	Medium	6.82	6.91	0.009	0.311	0.9007	Medium	6.82	6.91	0.022	0.743	0.9213	Medium	6.82	6.92	0.015	0.496	0.8649	Medium	6.82	6.92	0.007	0.234	0.8955	Medium	6.82	6.92	0.001	0.032	0.921	Medium	6.82	6.92	0.028	0.918	0.9196	High	6.82
Gedatolisib	940	953	FVLGIGDRHNDNIM	10.54	3	12	10.61	10.7	0.245	2.039	0.9213	High	10.61	10.7	0.21	1.75	0.9115	High	10.61	10.7	0.205	1.705	0.9081	High	10.61	10.7	0.504	4.196	0.9236	High	10.61	10.7	0.513	4.277	0.9235	Medium	10.61	10.7	0.404	3.363	0.9178	High	10.61	10.7	1.099	9.157	0.9235	High	10.61
Gedatolisib	954	960	ITETGNL	7.56	1	5	7.7	7.8	0.216	4.319	0.905	Medium	7.7	7.8	0.193	3.855	0.9102	Medium	7.7	7.8	0.231	4.618	0.9282	Medium	7.71	7.8	0.778	15.562	0.9058	Medium	7.7	7.8	0.777	15.544	0.9126	Medium	7.71	7.8	0.749	14.988	0.8921	Medium	7.7	7.8	1.404	28.084	0.8895	Medium	7.7
Gedatolisib	954	961	ITETGNLF	11.33	1	6	11.19	11.28	0.285	4.755	0.8488	Medium	11.26	11.33	0.271	4.519	0.869	Medium	11.29	11.36	0.243	4.042	0.9013	Medium	11.19	11.28	0.745	12.418	0.7947	Medium	11.19	11.28	0.815	13.578	0.7535	Medium	11.19	11.28	0.748	12.464	0.8102	Medium	11.15	11.22	1.383	23.048	0.8702	Medium	11.19
Gedatolisib	954	975	ITETGNLFHIDFGHILGNYKSF	13.27	3	20	13.23	13.31	5.214	26.071	0.8168	Medium	13.23	13.31	5.314	26.569	0.7853	Medium	13.23	13.31	5.175	25.873	0.8321	Medium	13.23	13.31	6.16	30.798	0.7855	Medium	13.23	13.31	5.935	29.676	0.7293	Medium	13.23	13.31	5.982	29.908	0.7937	Medium	13.23	13.31	6.557	32.784	0.8694	Medium	13.23
Gedatolisib	954	976	ITETGNLFHIDFGHILGNYKSFL	13.82	4	21	13.73	14.05	6.013	28.632	0.7798	Medium	13.73	14.05	6.005	28.596	0.7071	Medium	13.73	14.05	6.306	30.028	0.7613	Medium	13.73	14.05	6.766	32.221	0.7439	Medium	13.73	14.05	6.756	32.17	0.6967	Medium	13.73	14.05	7.202	34.294	0.717	Medium	13.73	14.05	7.663	36.489	0.8488	Medium	13.73
Gedatolisib	954	992	ITETGNLFHIDFGHILGNYKSFLGINKERVPFVLTPDFL	13.93	5	35	13.94	14.04	9.104	26.011	0.8639	High	13.94	14.04	9.058	25.881	0.8256	Medium	13.94	14.04	8.898	25.424	0.8557	Medium	13.94	14.04	10.394	29.697	0.8432	Medium	13.94	14.04	10.418	29.766	0.8163	Medium	13.94	14.04	10.294	29.411	0.8343	Medium	13.94	14.04	11.552	33.005	0.8652	High	13.94
Gedatolisib	961	972	FHIDFGHILGNY	12.72	3	10	12.54	12.98	3.182	31.818	0.8761	Medium	12.54	12.97	3.01	30.1	0.913	Medium	12.54	12.98	3.091	30.907	0.9237	Medium	12.54	12.98	3.553	35.526	0.7663	Medium	12.54	12.98	3.788	37.879	0.8536	Medium	12.54	12.98	3.774	37.737	0.8994	Medium	12.54	12.97	4.247	42.468	0.8973	Medium	12.54
Gedatolisib	961	975	FHIDFGHILGNYKSF	12.39	4	13	12.33	12.51	5.299	40.762	0.8138	Medium	12.33	12.5	5.2	39.997	0.877	Medium	12.33	12.51	5.169	39.763	0.8956	Medium	12.33	12.51	5.914	45.489	0.8254	Medium	12.33	12.51	6.087	46.819	0.7236	Medium	12.33	12.51	5.888	45.289	0.8907	Medium	12.33	12.5	6.474	49.797	0.8321	Medium	12.33
Gedatolisib	961	976	FHIDFGHILGNYKSFL	13.36	4	14	13.2	13.62	5.622	40.158	0.759	Medium	13.2	13.62	6.279	44.849	0.8055	Medium	13.2	13.62	6.228	44.487	0.8747	Medium	13.2	13.62	5.877	41.978	0.6607	Medium	13.2	13.62	5.956	42.545	0.7256	Medium	13.2	13.62	6.814	48.675	0.7937	Medium	13.2	13.62	6.35	45.356	0.7788	Medium	13.2
Gedatolisib	961	992	FHIDFGHILGNYKSFLGINKERVPFVLTPDFL	13.78	5	28	13.72	13.8	9.434	33.693	0.7758	Medium	13.72	13.8	9.067	32.383	0.6812	Medium	13.72	13.8	8.907	31.812	0.7182	Medium	13.72	13.8	10.772	38.473	0.7566	Medium	13.72	13.8	10.894	38.907	0.6188	Medium	13.71	13.78	10.471	37.396	0.684	Medium	13.72	13.8	11.692	41.756	0.8275	Medium	13.72
Gedatolisib	962	975	HIDFGHILGNYKSF	11.38	3	12	11.31	11.39	5.759	47.995	0.7854	Medium	11.3	11.39	5.544	46.203	0.8018	Medium	11.3	11.39	5.563	46.355	0.854	Medium	11.31	11.39	6.393	53.275	0.7538	Medium	11.31	11.39	6.543	54.527	0.7691	Medium	11.31	11.39	6.303	52.524	0.8392	Medium	11.31	11.39	6.699	55.825	0.8369	Medium	11.31
Gedatolisib	973	992	KSFLGINKERVPFVLTPDFL	12.87	4	16	12.79	12.87	4.415	27.592	0.8997	High	12.79	12.86	3.877	24.234	0.901	High	12.79	12.87	3.713	23.206	0.9207	High	12.79	12.87	5.145	32.157	0.862	Medium	12.79	12.87	4.963	31.02	0.898	High	12.79	12.87	4.402	27.515	0.9126	High	12.79	12.87	5.667	35.417	0.8872	High	12.79
Gedatolisib	976	992	LGINKERVPFVLTPDFL	13.06	3	13	12.93	13.48	2.755	21.194	0.94	High	12.93	13.48	2.495	19.19	0.9392	High	12.93	13.48	2.397	18.436	0.9361	High	12.94	13.48	3.433	26.407	0.9375	High	12.93	13.48	3.269	25.145	0.9379	High	12.93	13.48	3.018	23.215	0.9365	High	12.93	13.48	3.881	29.851	0.9072	High	12.93
Gedatolisib	977	992	GINKERVPFVLTPDFL	12.98	3	12	12.75	13.2	2.021	16.838	0.9057	Medium	12.75	13.2	1.859	15.494	0.9191	Medium	12.75	13.2	1.749	14.575	0.9259	Medium	12.75	13.2	2.656	22.132	0.86	Medium	12.75	13.2	2.558	21.316	0.8996	Medium	12.75	13.2	2.399	19.992	0.9158	Medium	12.75	13.2	3.397	28.31	0.9012	Medium	12.75
Gedatolisib	993	1014	FVMGTSGKKTSPHFQKFQDICV	9.54	2	19	9.4	9.75	1.789	9.417	0.8753	Medium	9.4	9.75	1.17	6.156	0.8697	Medium	9.4	9.75	1.018	5.357	0.9149	Medium	9.4	9.75	2.273	11.962	0.8008	Medium	9.4	9.75	2.236	11.767	0.8485	Medium	9.4	9.75	1.368	7.2	0.875	Medium	9.4	9.75	3.358	17.672	0.8888	Medium	9.4
Gedatolisib	1015	1026	KAYLALRHHTNL	6.32	2	10	6.3	6.54	0.33	3.301	0.8387	Medium	6.3	6.54	0.295	2.946	0.8757	Medium	6.3	6.54	0.223	2.226	0.9046	Medium	6.3	6.55	0.415	4.154	0.8249	Medium	6.3	6.55	0.372	3.718	0.783	Medium	6.3	6.55	0.331	3.314	0.8944	Medium	6.3	6.55	0.819	8.191	0.8799	Medium	6.3
Gedatolisib	1015	1027	KAYLALRHHTNLL	7.62	4	11	7.75	7.81	0.189	1.719	0.8158	Medium	7.74	7.81	0.192	1.748	0.8731	Medium	7.75	7.81	0.132	1.202	0.9036	Medium	7.75	7.81	0.261	2.375	0.7994	Medium	7.75	7.81	0.321	2.92	0.782	Medium	7.75	7.81	0.265	2.405	0.8706	Medium	7.75	7.81	0.771	7.008	0.8642	Medium	7.75
Gedatolisib	1017	1026	YLALRHHTNL	6.64	3	8	6.79	6.86	0.364	4.554	0.9082	Medium	6.79	6.85	0.264	3.298	0.9134	Medium	6.79	6.86	0.265	3.313	0.9252	Medium	6.79	6.86	0.446	5.58	0.8759	Medium	6.79	6.86	0.371	4.633	0.8935	Medium	6.79	6.86	0.367	4.587	0.9108	Medium	6.79	6.86	0.811	10.136	0.9016	Medium	6.79
Gedatolisib	1017	1027	YLALRHHTNLL	8.29	2	9	8.2	8.37	0.201	2.233	0.754	Medium	8.2	8.37	0.166	1.839	0.7021	Medium	8.2	8.37	0.159	1.771	0.7857	Medium	8.2	8.37	0.387	4.301	0.7423	Medium	8.2	8.37	0.331	3.674	0.7309	Medium	8.2	8.37	0.282	3.135	0.7353	Medium	8.2	8.37	0.651	7.237	0.7662	Medium	8.2
Gedatolisib	1019	1026	ALRHHTNL	4.09	2	6	4.19	4.26	0.384	6.395	0.9004	Medium	4.19	4.26	0.332	5.54	0.8748	Medium	4.19	4.26	0.307	5.115	0.9014	Medium	4.19	4.26	0.427	7.12	0.8753	Medium	4.19	4.26	0.447	7.444	0.8968	Medium	4.19	4.26	0.442	7.359	0.8873	Medium	4.19	4.26	0.89	14.828	0.9156	Medium	4.19
Gedatolisib	1019	1027	ALRHHTNLL	6.22	2	7	6.26	6.44	0.259	3.702	0.8892	Medium	6.26	6.44	0.214	3.061	0.8388	Medium	6.26	6.44	0.162	2.317	0.8992	Medium	6.26	6.44	0.343	4.898	0.8354	Medium	6.26	6.44	0.292	4.165	0.9041	Medium	6.26	6.44	0.377	5.384	0.8745	Medium	6.26	6.44	0.739	10.56	0.911	Medium	6.26
Gedatolisib	1031	1035	FSMML	13.4	1	3	13.29	13.5	0.013	0.442	0.8866	Medium	13.28	13.5	0.015	0.489	0.8906	Medium	13.29	13.5	0.01	0.342	0.8801	Medium	13.29	13.51	0.025	0.819	0.882	Medium	13.29	13.5	0.031	1.03	0.899	Medium	13.29	13.5	0.024	0.79	0.9003	Medium	13.29	13.5	0.07	2.349	0.9002	Medium	13.29
Gedatolisib	1035	1042	LMTGMPQL	11.7	2	5	11.69	11.76	1.669	33.371	0.8161	Medium	11.69	11.76	1.731	34.623	0.7312	Medium	11.76	11.83	1.721	34.424	0.8464	Medium	11.69	11.76	2.597	51.931	0.6562	Medium	11.78	11.85	2.654	53.086	0.8559	Medium	11.75	11.82	2.682	53.638	0.863	Medium	11.69	11.76	3.433	68.663	0.8437	Medium	11.69
Gedatolisib	1035	1050	LMTGMPQLTSKEDIEY	10.99	2	13	10.75	11.14	4.806	36.966	0.8449	Medium	10.75	11.14	4.157	31.974	0.8702	Medium	10.75	11.14	4.355	33.5	0.8808	Medium	10.75	11.14	7.124	54.797	0.8051	Medium	10.75	11.14	7.077	54.441	0.8186	Medium	10.75	11.14	6.431	49.466	0.8453	Medium	10.75	11.14	9.51	73.154	0.8788	Medium	10.75
Gedatolisib	1036	1042	MTGMPQL	11.2	1	4	10.87	11.12	1.939	48.471	0.8012	Medium	10.87	11.12	1.624	40.594	0.7481	Medium	10.87	11.12	1.939	48.472	0.8107	Medium	10.87	11.12	2.801	70.03	0.7211	Medium	10.87	11.12	2.867	71.675	0.8265	Medium	10.87	11.12	2.852	71.302	0.7855	Medium	10.87	11.12	3.344	83.603	0.8242	Medium	10.87
Gedatolisib	1050	1071	YIRDALTVGKNEEDAKKYFLDQ	9.72	4	20	9.77	9.87	2.613	13.066	0.9273	High	9.77	9.87	2.537	12.683	0.932	High	9.77	9.87	2.577	12.883	0.928	High	9.77	9.87	3.099	15.495	0.9192	High	9.77	9.87	3.148	15.739	0.9229	High	9.77	9.87	2.913	14.567	0.934	High	9.77	9.87	3.937	19.685	0.9098	High	9.77
Gedatolisib	1051	1069	IRDALTVGKNEEDAKKYFL	9.61	5	17	9.46	9.74	2.208	12.986	0.8458	Medium	9.46	9.74	2.075	12.205	0.8726	Medium	9.46	9.74	2.109	12.407	0.8991	Medium	9.46	9.75	2.718	15.99	0.814	Medium	9.46	9.74	2.619	15.408	0.8761	Medium	9.46	9.75	2.407	14.16	0.8866	Medium	9.46	9.74	3.413	20.076	0.8283	Medium	9.46
Gedatolisib	1051	1071	IRDALTVGKNEEDAKKYFLDQ	9.5	3	19	9.27	9.72	2.548	13.409	0.8991	Medium	9.26	9.72	2.432	12.8	0.9037	High	9.26	9.72	2.508	13.201	0.9183	High	9.27	9.72	2.991	15.743	0.8863	Medium	9.27	9.72	3.031	15.954	0.9026	Medium	9.27	9.72	2.807	14.774	0.9058	High	9.27	9.72	3.754	19.757	0.8859	Medium	9.27
Gedatolisib	1051	1073	IRDALTVGKNEEDAKKYFLDQIE	10.45	4	21	10.22	10.62	2.472	11.774	0.85	Medium	10.22	10.62	2.445	11.641	0.8425	Medium	10.22	10.62	2.406	11.455	0.8733	Medium	10.22	10.62	2.907	13.844	0.8174	Medium	10.22	10.62	3.067	14.606	0.8483	Medium	10.22	10.62	2.739	13.042	0.8444	Medium	10.22	10.62	3.82	18.19	0.8066	Medium	10.22
Gedatolisib	1072	1084	IEVCRDKGWTVQF	11.18	3	11	11.09	11.16	2.109	19.173	0.8742	Medium	11.09	11.16	2.006	18.236	0.9048	High	11.09	11.16	2.105	19.137	0.8882	Medium	11.09	11.16	4.839	43.988	0.8932	Medium	11.09	11.16	4.957	45.061	0.8802	Medium	11.06	11.14	4.644	42.219	0.9004	Medium	11.09	11.16	6.004	54.578	0.9309	High	11.09
Gedatolisib	1088	1092	LHLVL	11.09	2	3	10.94	11	1.285	42.845	0.9107	Medium	10.86	10.93	1.357	45.233	0.8227	Medium	11.04	11.1	1.31	43.661	0.9212	Medium	10.94	11	2.564	85.482	0.8734	Medium	10.94	11	2.56	85.327	0.8758	Medium	11	11.07	2.508	83.584	0.9088	Medium	10.94	11	2.605	86.825	0.9258	Medium	10.94
Omipalisib	6	12	YKQPVVL	8.77	1	4	8.68	8.88	3.655	91.384	0.9004	Medium	8.68	8.89	3.63	90.752	0.881	Medium	8.68	8.89	3.713	92.835	0.9123	Medium	8.68	8.89	3.737	93.433	0.9235	Medium	8.67	8.88	3.769	94.226	0.9099	Medium	8.68	8.89	3.748	93.706	0.9032	Medium	8.68	8.89	3.716	92.907	0.9147	Medium	8.68
Omipalisib	36	41	ELIPIE	10.59	1	3	10.64	10.73	0.037	1.234	0.9012	Medium	10.64	10.73	0.045	1.515	0.8972	Medium	10.64	10.74	0.048	1.606	0.9027	Medium	10.64	10.74	0.07	2.335	0.9092	Medium	10.64	10.73	0.068	2.277	0.914	Medium	10.64	10.74	0.072	2.385	0.9139	Medium	10.64	10.73	0.247	8.245	0.9043	Medium	10.69
Omipalisib	36	42	ELIPIEF	13.88	1	4	13.86	13.95	0.079	1.972	0.8214	Medium	13.94	14.01	0.089	2.22	0.7909	Medium	13.94	14.01	0.106	2.64	0.805	Medium	13.87	13.96	0.211	5.275	0.8164	Medium	13.86	13.95	0.157	3.926	0.7216	Medium	13.87	13.96	0.199	4.976	0.7257	Medium	13.86	13.96	0.351	8.774	0.8204	Medium	13.87
Omipalisib	42	58	FVLPTSQRKCKSPETAL	8.48	3	13	8.09	8.77	4.497	34.595	0.9227	High	8.09	8.77	4.393	33.791	0.891	High	8.09	8.77	4.333	33.331	0.9035	High	8.09	8.77	5.764	44.339	0.9355	High	8.09	8.76	5.653	43.485	0.9133	High	8.09	8.77	5.432	41.787	0.9083	High	8.09	8.77	6.601	50.78	0.9323	High	8.09
Omipalisib	42	59	FVLPTSQRKCKSPETALL	9.43	3	14	9.25	9.7	4.14	29.573	0.9147	Medium	9.26	9.7	3.93	28.073	0.91	Medium	9.26	9.7	3.798	27.13	0.9285	High	9.26	9.7	5.336	38.118	0.918	Medium	9.25	9.7	5.137	36.695	0.9213	Medium	9.26	9.7	4.843	34.595	0.9223	High	9.26	9.7	6.105	43.611	0.9126	Medium	9.26
Omipalisib	59	70	LHVAGHGNVEQM	6.54	2	10	6.78	6.86	1.346	13.458	0.8327	Medium	6.78	6.86	1.506	15.061	0.8346	Medium	6.78	6.86	1.327	13.27	0.857	Medium	6.78	6.87	1.878	18.781	0.8892	Medium	6.75	6.82	1.791	17.907	0.8867	Medium	6.78	6.87	1.846	18.456	0.8555	Medium	6.71	6.79	2.319	23.189	0.8987	Medium	6.78
Omipalisib	59	72	LHVAGHGNVEQMKA	5.97	2	12	5.9	6.06	0.652	5.437	0.8138	Medium	5.9	6.06	0.599	4.99	0.8077	Medium	5.9	6.06	0.576	4.798	0.8767	Medium	5.9	6.06	1.299	10.821	0.8855	Medium	5.9	6.06	1.139	9.49	0.8945	Medium	5.9	6.06	1.156	9.631	0.8827	Medium	5.9	6.06	2.093	17.444	0.8957	Medium	5.9
Omipalisib	60	70	HVAGHGNVEQM	5.29	2	9	5.31	5.42	0.647	7.192	0.9145	High	5.31	5.42	0.525	5.838	0.9028	High	5.31	5.42	0.59	6.555	0.9243	High	5.31	5.42	1.194	13.27	0.9307	High	5.31	5.42	1.224	13.597	0.9411	High	5.31	5.42	1.19	13.22	0.9415	High	5.31	5.42	1.859	20.657	0.9251	High	5.31
Omipalisib	60	74	HVAGHGNVEQMKAQV	5.94	3	13	5.9	6.23	0.801	6.164	0.763	Medium	5.9	6.23	0.539	4.145	0.7673	Medium	5.9	6.24	0.541	4.158	0.8004	Medium	5.9	6.24	1.211	9.315	0.7961	Medium	5.9	6.24	1.109	8.532	0.8011	Medium	5.9	6.24	1.032	7.935	0.8079	Medium	5.9	6.23	1.85	14.227	0.8124	Medium	5.9
Omipalisib	60	75	HVAGHGNVEQMKAQVW	8.28	3	14	8.15	8.48	0.423	3.021	0.7647	Medium	8.16	8.48	0.371	2.649	0.7573	Medium	8.16	8.49	0.385	2.751	0.8423	Medium	8.16	8.49	0.82	5.857	0.8379	Medium	8.16	8.49	0.651	4.65	0.8729	Medium	8.16	8.49	0.603	4.307	0.8654	Medium	8.16	8.48	1.434	10.244	0.8175	Medium	8.16
Omipalisib	71	76	KAQVWL	10.59	2	4	10.64	10.71	0.06	1.501	0.9517	Medium	10.64	10.71	0.066	1.645	0.9417	Medium	10.64	10.71	0.063	1.586	0.9621	Medium	10.64	10.71	0.072	1.811	0.9492	Medium	10.64	10.7	0.059	1.474	0.965	Medium	10.64	10.71	0.028	0.7	0.9481	Medium	10.64	10.71	0.054	1.339	0.929	Medium	10.64
Omipalisib	77	84	RALETSVA	6.28	2	6	6.06	6.15	2.397	39.947	0.7757	Medium	6.07	6.15	2.345	39.087	0.7562	Medium	6.07	6.15	2.447	40.79	0.8594	Medium	6.07	6.15	3.259	54.321	0.8033	Medium	6.07	6.15	3.358	55.964	0.8649	Medium	6.07	6.15	3.262	54.364	0.8547	Medium	6.07	6.15	3.91	65.166	0.8343	Medium	6.07
Omipalisib	79	84	LETSVA	6.27	1	4	6.18	6.27	2.406	60.149	0.8917	Medium	6.18	6.25	2.358	58.948	0.8498	Medium	6.18	6.28	2.395	59.884	0.9073	Medium	6.19	6.28	3.159	78.967	0.9055	Medium	6.19	6.28	3.21	80.248	0.9087	Medium	6.19	6.28	3.134	78.342	0.9187	Medium	6.18	6.28	3.433	85.83	0.9247	Medium	6.19
Omipalisib	79	86	LETSVAAD	6.15	1	6	5.98	6.38	3.939	65.651	0.8085	Medium	5.98	6.38	3.431	57.177	0.8722	Medium	5.98	6.38	3.718	61.965	0.8809	Medium	5.98	6.38	4.752	79.203	0.8218	Medium	5.98	6.38	4.562	76.026	0.9083	Medium	5.98	6.38	4.497	74.955	0.8719	Medium	5.98	6.38	4.942	82.364	0.8264	Medium	5.98
Omipalisib	87	99	FYHRLGPHHFLLL	10.38	2	10	10.4	10.48	0.355	3.554	0.9053	Medium	10.4	10.48	0.337	3.366	0.8709	Medium	10.4	10.48	0.364	3.636	0.9176	Medium	10.4	10.48	0.846	8.457	0.9007	Medium	10.33	10.4	0.675	6.751	0.9169	Medium	10.4	10.48	0.637	6.366	0.9008	Medium	10.4	10.48	1.059	10.593	0.8967	Medium	10.4
Omipalisib	88	98	YHRLGPHHFLL	8.43	4	8	8.57	8.67	0.469	5.867	0.8703	Medium	8.58	8.67	0.368	4.594	0.9067	Medium	8.58	8.67	0.424	5.303	0.8986	Medium	8.58	8.67	0.889	11.11	0.8498	Medium	8.58	8.66	0.808	10.105	0.8999	Medium	8.58	8.67	0.81	10.123	0.9103	Medium	8.58	8.67	1.154	14.419	0.8674	Medium	8.58
Omipalisib	88	99	YHRLGPHHFLLL	9.88	4	9	9.84	10.38	0.417	4.632	0.9244	High	9.84	10.38	0.374	4.153	0.9166	High	9.85	10.38	0.373	4.141	0.9313	High	9.85	10.38	0.817	9.078	0.9063	High	9.84	10.38	0.759	8.437	0.9354	High	9.85	10.38	0.708	7.865	0.9576	High	9.84	10.38	1.029	11.431	0.9466	High	9.85
Omipalisib	100	106	YQKKGQW	5.9	1	5	6	6.09	1.713	34.263	0.9329	Medium	6	6.09	1.6	32.006	0.9353	High	6	6.09	1.674	33.474	0.9154	Medium	6	6.09	2.713	54.255	0.9103	High	6	6.09	2.715	54.294	0.8871	High	6	6.09	2.635	52.702	0.9033	Medium	6	6.09	3.052	61.033	0.9116	Medium	6.04
Omipalisib	107	113	YEIYDKY	9.1	1	5	8.99	9.18	1.381	27.618	0.8366	Medium	8.99	9.18	1.463	29.26	0.8616	Medium	8.99	9.18	1.313	26.254	0.8722	Medium	8.99	9.18	2.117	42.334	0.8173	Medium	8.98	9.18	2.137	42.74	0.8716	Medium	8.99	9.18	2.17	43.4	0.8594	Medium	8.99	9.18	2.778	55.554	0.8149	Medium	8.99
Omipalisib	107	118	YEIYDKYQVVQT	9.45	2	10	9.41	9.47	1.364	13.637	0.8284	Medium	9.41	9.47	1.361	13.611	0.8699	Medium	9.41	9.48	1.256	12.557	0.9062	High	9.41	9.48	2.229	22.293	0.8925	Medium	9.4	9.47	2.144	21.444	0.9244	High	9.41	9.48	2.101	21.011	0.9193	High	9.41	9.47	3.448	34.478	0.8885	High	9.41
Omipalisib	107	121	YEIYDKYQVVQTLDC	11.03	2	13	11.13	11.22	2.464	18.956	0.8882	Medium	11.13	11.22	2.511	19.319	0.9286	Medium	11.13	11.22	2.381	18.318	0.923	Medium	11.13	11.22	3.365	25.885	0.8962	Medium	11.12	11.22	3.412	26.245	0.9425	Medium	11.13	11.22	3.249	24.991	0.9386	Medium	11.13	11.22	4.63	35.616	0.8947	Medium	11.13
Omipalisib	114	119	QVVQTL	8.16	1	4	8.17	8.26	0.067	1.68	0.8447	Medium	8.17	8.27	0.058	1.441	0.8068	Medium	8.18	8.27	0.065	1.623	0.8348	Medium	8.18	8.27	0.062	1.539	0.8624	Medium	8.18	8.27	0.079	1.982	0.9146	Medium	8.18	8.27	0.062	1.548	0.8679	Medium	8.17	8.27	0.141	3.516	0.8437	Medium	8.18
Omipalisib	122	137	LRYWKATHRSPGQIHL	7.45	4	13	7.44	7.94	0.743	5.718	0.8919	Medium	7.44	7.95	0.567	4.358	0.9016	Medium	7.44	7.95	0.533	4.103	0.9023	Medium	7.58	7.69	1.797	13.823	0.8239	Medium	7.49	7.62	1.341	10.315	0.909	Medium	7.45	7.95	1.281	9.85	0.9119	Medium	7.44	7.95	3.149	24.226	0.9163	Medium	7.45
Omipalisib	125	137	WKATHRSPGQIHL	6.9	3	10	6.81	6.88	0.885	8.848	0.7625	Medium	6.81	6.88	0.62	6.197	0.7401	Medium	6.81	6.88	0.878	8.779	0.861	Medium	6.82	6.88	1.569	15.685	0.8897	Medium	6.82	6.88	1.519	15.19	0.8605	Medium	6.82	6.88	1.519	15.19	0.8621	Medium	6.81	6.88	2.157	21.57	0.9263	Medium	6.82
Omipalisib	138	149	VQRHPPSEESQA	4.07	2	8	3.94	4.38	3.297	41.213	0.9142	Medium	3.94	4.38	3.283	41.038	0.9043	Medium	3.94	4.38	3.219	40.239	0.9372	High	3.94	4.38	4.183	52.284	0.9268	Medium	3.94	4.38	4.31	53.877	0.9222	High	3.94	4.38	4.139	51.741	0.9144	Medium	3.94	4.38	5.203	65.034	0.926	Medium	3.94
Omipalisib	138	150	VQRHPPSEESQAF	6.68	2	9	6.53	6.95	2.928	32.533	0.8528	Medium	6.54	6.95	2.849	31.657	0.8412	Medium	6.54	6.95	2.843	31.589	0.8773	Medium	6.54	6.95	4.056	45.068	0.8649	Medium	6.54	6.95	4.239	47.096	0.8976	Medium	6.54	6.95	4.157	46.19	0.8675	Medium	6.54	6.95	5.334	59.271	0.8581	Medium	6.54
Omipalisib	138	157	VQRHPPSEESQAFQRQLTAL	9.74	4	16	9.55	9.94	1.988	12.426	0.8098	Medium	9.55	9.94	1.827	11.417	0.8042	Medium	9.55	9.95	1.805	11.279	0.8573	Medium	9.55	9.95	3.477	21.731	0.8271	Medium	9.55	9.94	3.424	21.401	0.8297	Medium	9.55	9.95	3.143	19.642	0.8302	Medium	9.55	9.94	5.654	35.335	0.8076	Medium	9.55
Omipalisib	150	157	FQRQLTAL	9.07	2	6	9.04	9.14	0.16	2.673	0.9035	Medium	9.05	9.14	0.18	3.006	0.8904	Medium	9.05	9.14	0.158	2.636	0.9062	Medium	9.05	9.14	0.303	5.056	0.919	Medium	9.04	9.13	0.333	5.55	0.9203	Medium	9.05	9.14	0.32	5.335	0.9229	Medium	9.05	9.14	1.109	18.479	0.9109	High	9.05
Omipalisib	151	157	QRQLTAL	7.99	2	5	8.02	8.11	0.135	2.694	0.9373	Medium	8.02	8.12	0.153	3.065	0.9341	High	8.02	8.12	0.126	2.526	0.95	High	8.02	8.12	0.275	5.494	0.946	High	8.03	8.12	0.307	6.134	0.9345	High	8.02	8.12	0.275	5.506	0.9496	High	8.02	8.11	0.991	19.826	0.9412	High	8.02
Omipalisib	158	164	IGYDVTD	8.21	1	5	8.08	8.31	0.766	15.324	0.8612	Medium	8.19	8.34	0.778	15.558	0.9024	High	8.08	8.32	0.737	14.739	0.8919	High	8.08	8.32	1.098	21.952	0.8844	High	8.08	8.32	1.057	21.134	0.9335	High	8.08	8.32	1.078	21.562	0.9012	High	8.08	8.32	2.358	47.154	0.8864	High	8.08
Omipalisib	158	173	IGYDVTDVSNVHDDEL	10.34	2	14	10.25	10.33	3.39	24.211	0.9106	Medium	10.26	10.33	3.186	22.754	0.9077	High	10.26	10.33	3.344	23.882	0.9222	High	10.26	10.33	4.804	34.317	0.8994	High	10.25	10.33	4.976	35.541	0.8927	Medium	10.26	10.33	4.608	32.912	0.9137	High	10.26	10.33	6.292	44.943	0.8898	High	10.26
Omipalisib	158	174	IGYDVTDVSNVHDDELE	9.9	2	15	9.86	9.93	3.361	22.408	0.9096	High	9.86	9.93	3.068	20.455	0.898	High	9.86	9.93	3.372	22.483	0.9254	High	9.86	9.93	4.8	32.003	0.9154	High	9.86	9.92	5.025	33.503	0.7054	Medium	9.86	9.93	4.617	30.78	0.9274	High	9.86	9.93	6.467	43.115	0.9067	High	9.86
Omipalisib	161	174	DVTDVSNVHDDELE	8.32	2	12	8.21	8.62	3.192	26.599	0.9055	Medium	8.43	8.51	3.139	26.162	0.8528	Medium	8.22	8.62	3.164	26.365	0.9219	High	8.22	8.62	4.5	37.504	0.9218	High	8.48	8.55	4.822	40.187	0.3394	Medium	8.42	8.57	4.335	36.123	0.9298	High	8.45	8.53	5.429	45.242	0.8987	Medium	8.46
Omipalisib	165	175	VSNVHDDELEF	10.56	2	9	10.44	10.66	1.103	12.254	0.8204	Medium	10.44	10.66	1.166	12.956	0.7793	Medium	10.44	10.66	1.119	12.43	0.8333	Medium	10.44	10.66	2.126	23.621	0.841	Medium	10.44	10.65	2.178	24.196	0.8111	Medium	10.44	10.66	2.16	24.005	0.8335	Medium	10.44	10.66	2.763	30.702	0.8359	Medium	10.44
Omipalisib	174	182	EFTRRGLVT	7.02	2	7	6.99	7.08	0.199	2.848	0.9471	High	6.99	7.08	0.194	2.771	0.9329	Medium	6.99	7.08	0.194	2.777	0.9522	High	6.99	7.08	0.245	3.505	0.9326	High	6.99	7.08	0.251	3.59	0.9524	High	6.99	7.08	0.27	3.856	0.945	High	6.99	7.08	0.66	9.425	0.9615	High	6.99
Omipalisib	174	185	EFTRRGLVTPRM	7.96	3	9	7.82	8.05	0.142	1.577	0.873	Medium	7.82	8.06	0.206	2.294	0.8596	Medium	7.82	8.06	0.164	1.828	0.9143	Medium	7.82	8.06	0.222	2.469	0.8658	Medium	7.82	8.06	0.221	2.46	0.9064	Medium	7.82	8.06	0.24	2.662	0.915	Medium	7.82	8.06	0.663	7.371	0.889	Medium	7.82
Omipalisib	174	187	EFTRRGLVTPRMAE	7.6	2	11	7.54	7.63	0.334	3.037	0.6792	Medium	7.54	7.63	0.412	3.741	0.6268	Medium	7.55	7.63	0.252	2.29	0.7301	Medium	7.55	7.63	0.291	2.643	0.7847	Medium	7.55	7.63	0.349	3.173	0.8165	Medium	7.55	7.63	0.405	3.683	0.6995	Medium	7.54	7.63	0.925	8.41	0.8467	Medium	7.55
Omipalisib	174	195	EFTRRGLVTPRMAEVASRDPKL	8.28	5	18	8.13	8.45	1.079	5.994	0.8552	Medium	8.13	8.45	0.964	5.354	0.8548	Medium	8.13	8.45	1.097	6.096	0.8834	Medium	8.13	8.45	1.905	10.584	0.8426	Medium	8.13	8.45	1.923	10.684	0.8711	Medium	8.13	8.45	1.844	10.245	0.9025	Medium	8.13	8.45	3.41	18.945	0.8268	Medium	8.13
Omipalisib	175	182	FTRRGLVT	6.2	2	6	6.13	6.34	0.169	2.811	0.8874	Medium	6.13	6.34	0.226	3.764	0.9011	Medium	6.13	6.34	0.193	3.218	0.9114	Medium	6.14	6.35	0.229	3.82	0.9134	Medium	6.14	6.35	0.31	5.164	0.9231	Medium	6.14	6.35	0.285	4.743	0.9307	Medium	6.13	6.34	0.677	11.278	0.9146	Medium	6.13
Omipalisib	176	182	TRRGLVT	4.73	2	5	4.86	4.95	0.171	3.425	0.8964	Medium	4.86	4.95	0.15	3	0.9204	Medium	4.86	4.95	0.16	3.194	0.9477	Medium	4.86	4.95	0.183	3.652	0.9404	Medium	4.86	4.95	0.186	3.718	0.9364	Medium	4.86	4.95	0.171	3.427	0.9466	Medium	4.86	4.95	0.614	12.284	0.8975	Medium	4.86
Omipalisib	176	185	TRRGLVTPRM	6.49	2	7	6.5	6.59	0.158	2.262	0.8027	Medium	6.5	6.59	0.219	3.123	0.7759	Medium	6.5	6.6	0.248	3.541	0.852	Medium	6.5	6.6	0.247	3.531	0.9034	Medium	6.51	6.6	0.282	4.031	0.8798	Medium	6.5	6.6	0.236	3.377	0.8637	Medium	6.5	6.59	0.677	9.673	0.9231	High	6.5
Omipalisib	183	195	PRMAEVASRDPKL	6.78	3	10	6.66	6.99	1.204	12.043	0.8901	Medium	6.66	6.99	1.183	11.828	0.8627	Medium	6.66	6.99	1.191	11.914	0.9074	Medium	6.66	6.99	1.881	18.811	0.9059	Medium	6.66	6.99	1.897	18.966	0.8903	Medium	6.66	6.99	1.879	18.789	0.9157	Medium	6.66	6.99	3.273	32.731	0.8959	Medium	6.66
Omipalisib	186	195	AEVASRDPKL	5.95	2	7	5.87	6.27	1.166	16.664	0.932	High	5.87	6.28	1.2	17.138	0.9213	High	5.87	6.28	1.165	16.64	0.9415	High	5.87	6.28	1.815	25.932	0.9421	High	5.88	6.28	1.915	27.363	0.9301	High	5.88	6.28	1.852	26.463	0.9351	High	5.87	6.28	3.004	42.918	0.9561	High	5.87
Omipalisib	188	195	VASRDPKL	5.26	2	5	5.21	5.59	1.126	22.514	0.7849	Medium	5.21	5.59	1.144	22.875	0.7225	Medium	5.21	5.59	1.157	23.141	0.8299	Medium	5.21	5.59	1.713	34.265	0.915	High	5.21	5.59	1.831	36.627	0.9036	Medium	5.21	5.59	1.718	34.361	0.9163	High	5.21	5.59	2.502	50.034	0.9236	High	5.21
Omipalisib	196	211	YAMHPWVTSKPLPEYL	11.65	3	11	11.54	12.1	3.076	27.964	0.9062	High	11.54	12.1	3.085	28.042	0.9158	High	11.54	12.1	3.04	27.637	0.9134	High	11.54	12.1	4.282	38.928	0.9294	High	11.54	12.1	4.241	38.554	0.9207	High	11.54	12.1	4.084	37.124	0.9024	High	11.54	12.1	5.622	51.109	0.9074	High	11.54
Omipalisib	212	221	WKKIANNCIF	10.39	2	8	10.45	10.51	1.963	24.532	0.9158	High	10.45	10.52	1.957	24.461	0.9222	High	10.45	10.52	1.907	23.84	0.9255	High	10.45	10.52	3.229	40.358	0.9316	High	10.44	10.51	3.174	39.679	0.9167	High	10.45	10.52	3.057	38.209	0.9267	High	10.45	10.52	4.73	59.128	0.9342	High	10.45
Omipalisib	222	232	IVIHRSTTSQT	4.59	2	9	4.74	4.81	3.103	34.473	0.9465	Medium	4.64	4.73	2.998	33.316	0.9386	Medium	4.64	4.73	2.958	32.865	0.9424	Medium	4.64	4.73	3.198	35.528	0.9495	Medium	4.64	4.73	3.291	36.568	0.9419	Medium	4.64	4.73	3.112	34.572	0.9525	Medium	4.64	4.73	3.563	39.587	0.9461	Medium	4.64
Omipalisib	223	233	VIHRSTTSQTI	4.58	3	9	4.54	4.92	3.18	35.329	0.8563	Medium	4.55	4.92	3.371	37.459	0.8172	Medium	4.55	4.92	3.247	36.081	0.8513	Medium	4.55	4.93	3.21	35.664	0.8786	Medium	4.55	4.93	3.273	36.362	0.8962	Medium	4.55	4.93	3.385	37.611	0.8294	Medium	4.55	4.92	3.563	39.594	0.8886	Medium	4.55
Omipalisib	232	245	TIKVSPDDTPGAIL	10.16	2	10	10.12	10.13	1.339	13.392	0.8438	Medium	10.12	10.13	1.307	13.074	0.8539	Medium	10.12	10.13	1.3	12.997	0.8755	Medium	10.12	10.13	2.156	21.56	0.8531	Medium	10.12	10.13	2.154	21.538	0.9	Medium	10.12	10.13	2.119	21.187	0.8458	Medium	10.12	10.13	3.065	30.645	0.8142	Medium	10.12
Omipalisib	233	245	IKVSPDDTPGAIL	9.99	2	9	9.78	10.25	0.962	10.687	0.9335	High	9.78	10.26	0.957	10.636	0.9168	Medium	9.79	10.26	0.927	10.299	0.9242	High	9.79	10.26	1.289	14.322	0.937	High	9.78	10.25	1.313	14.585	0.932	High	9.79	10.26	1.275	14.164	0.9248	High	9.78	10.26	2.201	24.459	0.9266	High	9.79
Omipalisib	249	269	FTKMAKKKSLMDIPESQSEQD	7.24	4	18	7.56	7.63	9.982	55.455	0.9083	High	7.19	7.74	9.531	52.949	0.9257	High	7.19	7.74	9.619	53.437	0.9188	High	7.45	7.54	10.633	59.075	0.8875	High	7.19	7.74	10.397	57.763	0.937	High	7.19	7.74	10.213	56.738	0.9285	High	7.46	7.54	10.854	60.302	0.9378	High	7.37
Omipalisib	270	278	FVLRVCGRD	8.8	3	7	8.91	8.99	0.29	4.14	0.8542	Medium	8.91	9	0.307	4.382	0.8634	Medium	8.91	9	0.219	3.124	0.8833	Medium	8.91	9	0.37	5.279	0.8707	Medium	8.91	8.99	0.332	4.739	0.8909	Medium	8.91	9	0.328	4.684	0.8842	Medium	8.91	9	0.783	11.192	0.8894	Medium	8.91
Omipalisib	270	281	FVLRVCGRDEYL	11.08	3	10	11.1	11.2	0.243	2.434	0.7945	Medium	11.1	11.2	0.231	2.315	0.8936	Medium	11.11	11.21	0.174	1.745	0.9095	Medium	11.1	11.21	0.315	3.148	0.8283	Medium	11.1	11.2	0.256	2.56	0.9203	Medium	11.11	11.21	0.245	2.445	0.9217	Medium	11.1	11.2	0.718	7.181	0.8734	Medium	11.11
Omipalisib	282	291	VGETPIKNFQ	8	1	7	8	8.09	0.666	9.516	0.888	Medium	8	8.09	0.702	10.022	0.9024	High	8	8.09	0.704	10.062	0.8953	Medium	8	8.09	0.643	9.186	0.9105	High	8	8.09	0.685	9.78	0.9109	High	8	8.09	0.695	9.924	0.8952	Medium	8	8.09	0.742	10.597	0.923	High	8
Omipalisib	282	291	VGETPIKNFQ	8	2	7	7.84	8.35	0.614	8.768	0.918	High	7.84	8.35	0.645	9.213	0.9076	High	7.84	8.35	0.635	9.078	0.9207	High	7.84	8.35	0.654	9.341	0.9299	High	7.84	8.35	0.668	9.547	0.9292	High	7.84	8.35	0.69	9.859	0.9179	High	7.84	8.35	0.758	10.83	0.9071	High	7.84
Omipalisib	282	307	VGETPIKNFQWVRHCLKNGEEIHVVL	11.24	4	23	11.25	11.34	1.125	4.891	0.8107	Medium	11.25	11.35	1.121	4.876	0.8276	Medium	11.26	11.35	1.123	4.882	0.8845	Medium	11.26	11.35	3.753	16.319	0.8578	Medium	11.25	11.34	3.377	14.683	0.8954	Medium	11.26	11.35	3.181	13.83	0.8939	Medium	11.25	11.35	4.804	20.886	0.8624	Medium	11.26
Omipalisib	292	302	WVRHCLKNGEE	5.33	3	9	5.45	5.56	0.727	8.073	0.9384	High	5.45	5.56	0.653	7.253	0.9371	High	5.45	5.56	0.625	6.949	0.9366	High	5.45	5.56	1.996	22.18	0.9529	High	5.46	5.56	1.996	22.177	0.9558	High	5.46	5.56	1.939	21.542	0.9433	High	5.45	5.56	2.311	25.68	0.9547	High	5.45
Omipalisib	292	307	WVRHCLKNGEEIHVVL	8.82	4	14	8.75	9.25	0.711	5.078	0.8584	Medium	8.75	9.25	0.695	4.968	0.898	Medium	8.75	9.25	0.614	4.386	0.8746	Medium	8.76	9.25	2.543	18.167	0.8677	Medium	8.75	9.24	2.082	14.87	0.9297	Medium	8.75	9.25	2.072	14.8	0.9186	Medium	8.75	9.25	3.37	24.075	0.8606	Medium	8.76
Omipalisib	308	315	DTPPDPAL	8.37	1	3	8.36	8.44	0.581	19.381	0.9022	Medium	8.36	8.44	0.603	20.09	0.8836	Medium	8.36	8.44	0.604	20.124	0.8935	Medium	8.36	8.44	1.344	44.793	0.8998	Medium	8.36	8.45	1.356	45.188	0.9208	Medium	8.36	8.44	1.384	46.129	0.9118	Medium	8.36	8.44	1.7	56.669	0.8916	Medium	8.36
Omipalisib	316	335	DEVRKEEWPLVDDCTGVTGY	12.39	2	17	12.28	12.63	7.87	46.295	0.8643	Medium	12.29	12.63	7.838	46.103	0.8485	Medium	12.29	12.63	7.659	45.053	0.9108	Medium	12.29	12.63	8.683	51.078	0.9066	High	12.28	12.63	8.763	51.547	0.8464	Medium	12.29	12.63	8.434	49.612	0.8532	Medium	12.29	12.63	9.587	56.393	0.9186	High	12.29
Omipalisib	316	339	DEVRKEEWPLVDDCTGVTGYHEQL	11.9	3	21	11.85	11.92	9.285	44.216	0.7712	Medium	12.03	12.12	9.477	45.13	0.7663	Medium	11.96	12.03	9.36	44.573	0.8401	Medium	12.05	12.12	9.953	47.394	0.7649	Medium	12.01	12.09	10.221	48.67	0.7162	Medium	11.96	12.03	9.791	46.625	0.8096	Medium	11.96	12.03	10.57	50.334	0.7875	Medium	11.96
Omipalisib	328	339	DCTGVTGYHEQL	8.95	2	10	8.78	9.03	5.975	59.748	0.7885	Medium	8.78	9.03	6.332	63.319	0.7724	Medium	8.78	9.03	6.308	63.081	0.8497	Medium	8.78	9.03	6.632	66.32	0.8552	Medium	8.77	9.02	6.602	66.016	0.8791	Medium	8.78	9.03	6.54	65.4	0.8688	Medium	8.78	9.03	6.671	66.71	0.7847	Medium	8.78
Omipalisib	336	350	HEQLTIHGKDHESVF	7.44	3	13	7.37	7.85	5.211	40.084	0.8266	Medium	7.38	7.85	4.45	34.228	0.8607	Medium	7.38	7.86	4.516	34.74	0.9035	Medium	7.38	7.86	5.56	42.767	0.8675	Medium	7.38	7.86	4.68	36.003	0.9082	Medium	7.38	7.86	4.561	35.085	0.9038	Medium	7.38	7.85	5.694	43.797	0.8722	Medium	7.38
Omipalisib	340	350	TIHGKDHESVF	6.75	2	9	6.75	6.85	2.461	27.35	0.9024	Medium	6.75	6.86	2.265	25.164	0.8816	Medium	6.76	6.86	2.33	25.884	0.9001	High	6.76	6.86	2.494	27.706	0.9244	High	6.76	6.86	2.454	27.27	0.9016	High	6.76	6.86	2.389	26.544	0.9127	High	6.75	6.86	2.574	28.601	0.9288	High	6.76
Omipalisib	355	379	WDCDRKFRVKIRGIDIPVLPRNTDL	10.43	5	21	10.59	10.68	3.296	15.695	0.7908	Medium	10.59	10.68	3.278	15.608	0.8344	Medium	10.59	10.69	3.211	15.288	0.853	Medium	10.59	10.69	4.596	21.883	0.7732	Medium	10.59	10.68	4.388	20.896	0.761	Medium	10.59	10.69	4.136	19.695	0.8196	Medium	10.59	10.68	5.511	26.242	0.8886	Medium	10.59
Omipalisib	370	379	IPVLPRNTDL	9.61	2	7	9.53	9.62	3.89	55.574	0.8095	Medium	9.53	9.62	3.814	54.492	0.838	Medium	9.49	9.57	3.903	55.759	0.7935	Medium	9.54	9.62	4.487	64.099	0.7875	Medium	9.53	9.61	4.484	64.058	0.7938	Medium	9.48	9.55	4.377	62.535	0.7875	Medium	9.53	9.62	5.389	76.988	0.8659	Medium	9.54
Omipalisib	382	394	FVEANIQHGQQVL	9.08	2	11	8.98	9.37	1.252	11.38	0.8632	Medium	8.98	9.37	1.266	11.511	0.8868	Medium	8.98	9.38	1.284	11.671	0.923	High	8.98	9.38	2.045	18.591	0.8571	Medium	8.97	9.37	2.201	20.012	0.9145	High	8.98	9.38	2.071	18.827	0.8937	Medium	8.98	9.37	2.344	21.305	0.9144	High	8.98
Omipalisib	383	394	VEANIQHGQQVL	7.88	2	10	7.72	8.3	1.202	12.017	0.8602	Medium	7.72	8.3	1.243	12.431	0.8942	Medium	7.72	8.3	1.269	12.686	0.9209	High	7.72	8.3	1.996	19.957	0.8433	Medium	7.72	8.3	2.081	20.81	0.8712	Medium	7.72	8.3	2.067	20.67	0.8607	Medium	7.72	8.3	2.458	24.584	0.9131	High	7.72
Omipalisib	395	407	CQRRTSPKPFTEE	5.48	3	9	5.45	5.98	1.077	11.969	0.8454	Medium	5.45	5.98	0.975	10.832	0.8494	Medium	5.45	5.98	1.016	11.293	0.9045	High	5.45	5.98	1.796	19.954	0.8758	Medium	5.46	5.98	1.839	20.434	0.8761	Medium	5.46	5.98	1.75	19.445	0.8787	Medium	5.45	5.98	2.885	32.058	0.9426	High	5.45
Omipalisib	417	428	SIKIKDLPKGAL	8.16	2	9	8.2	8.29	0.312	3.465	0.9308	Medium	8.2	8.29	0.347	3.857	0.9119	Medium	8.2	8.29	0.272	3.019	0.9361	Medium	8.2	8.29	0.73	8.112	0.9366	Medium	8.2	8.29	0.706	7.849	0.8964	Medium	8.2	8.29	0.729	8.099	0.9168	Medium	8.2	8.29	1.727	19.19	0.9167	Medium	8.2
Omipalisib	463	468	YVNLLL	13.37	1	4	13.32	13.41	0.173	4.314	0.6132	Medium	13.37	13.44	0.182	4.559	0.6284	Medium	13.32	13.41	0.231	5.763	0.5266	Medium	13.32	13.41	0.193	4.814	0.5837	Medium	13.39	13.47	0.209	5.217	0.6583	Medium	13.38	13.45	0.209	5.235	0.5812	Medium	13.32	13.41	0.385	9.634	0.8401	Medium	13.32
Omipalisib	467	479	LLIDHRFLLRRGE	8.97	4	11	9.03	9.13	0.624	5.669	0.875	Medium	9.03	9.13	0.621	5.648	0.9076	Medium	9.03	9.13	0.568	5.16	0.9146	High	9.03	9.13	1.619	14.715	0.8093	Medium	9.02	9.13	1.554	14.129	0.8672	Medium	9.03	9.13	1.493	13.572	0.8742	Medium	9.03	9.13	2.408	21.893	0.927	High	9.03
Omipalisib	467	480	LLIDHRFLLRRGEY	9.61	4	12	9.58	9.66	0.683	5.693	0.9261	High	9.58	9.66	0.609	5.073	0.93	High	9.59	9.66	0.574	4.779	0.9316	High	9.59	9.66	1.652	13.763	0.9261	High	9.58	9.65	1.518	12.652	0.9047	Medium	9.59	9.66	1.515	12.622	0.9074	Medium	9.58	9.66	2.49	20.75	0.9449	High	9.59
Omipalisib	485	497	WQISGKGEDQGSF	9.72	2	11	9.88	9.94	6.478	58.888	0.8068	Medium	9.88	9.94	6.16	56.004	0.8888	Medium	9.88	9.95	6.305	57.315	0.9257	Medium	9.86	9.94	6.789	61.723	0.846	Medium	9.87	9.94	6.508	59.167	0.9086	Medium	9.88	9.95	6.069	55.17	0.884	Medium	9.88	9.94	7.649	69.54	0.8885	Medium	9.88
Omipalisib	498	515	NADKLTSATNPDKENSMS	6	3	15	5.75	6.45	2.625	17.497	0.8665	Medium	5.75	6.45	2.578	17.184	0.9071	Medium	5.75	6.45	2.609	17.396	0.9262	High	5.75	6.45	4.29	28.597	0.8818	Medium	5.75	6.45	4.458	29.719	0.9158	Medium	5.75	6.45	4.278	28.518	0.8859	Medium	5.75	6.45	5.914	39.429	0.9258	High	5.75
Omipalisib	498	517	NADKLTSATNPDKENSMSIS	7.37	3	17	7.21	7.54	2.7	15.881	0.514	Medium	7.22	7.54	2.576	15.151	0.55	Medium	7.22	7.55	2.333	13.725	0.7679	Medium	7.22	7.55	3.891	22.887	0.6474	Medium	7.22	7.55	4.011	23.594	0.6976	Medium	7.22	7.55	3.818	22.459	0.6533	Medium	7.22	7.54	5.666	33.331	0.7599	Medium	7.22
Omipalisib	520	551	LDNYCHPIALPKHQPTPDPEGDRVRAEMPNQL	8.81	4	24	8.61	9.3	11.863	49.431	0.8494	Medium	8.61	9.31	11.77	49.042	0.8783	High	8.61	9.31	11.497	47.903	0.9288	High	8.61	9.31	13.297	55.404	0.8808	High	8.61	9.3	13.44	56.001	0.9147	High	8.61	9.31	13.021	54.254	0.8887	High	8.61	9.31	13.951	58.128	0.9132	High	8.61
Omipalisib	523	551	YCHPIALPKHQPTPDPEGDRVRAEMPNQL	8.37	5	21	8.17	8.62	10.592	50.44	0.6109	Medium	8.17	8.63	10.594	50.445	0.7182	Medium	8.18	8.63	10.41	49.572	0.8052	Medium	8.36	8.48	11.899	56.661	0.6487	Medium	8.34	8.43	11.927	56.795	0.831	Medium	8.37	8.47	11.704	55.735	0.7695	Medium	8.17	8.63	12.678	60.371	0.7964	Medium	8.18
Omipalisib	557	573	AIIATDPLNPLTAEDKE	10.7	2	13	10.78	10.86	4.726	36.352	0.8382	Medium	10.81	10.89	4.857	37.359	0.8308	Medium	10.58	10.66	4.396	33.815	0.8232	Medium	10.64	10.74	6.935	53.347	0.8912	High	10.64	10.73	6.986	53.742	0.9268	High	10.64	10.74	6.859	52.759	0.8987	High	10.64	10.73	9.386	72.199	0.9104	High	10.64
Omipalisib	557	578	AIIATDPLNPLTAEDKELLWHF	13.73	3	18	13.67	13.76	5.22	28.998	0.7995	Medium	13.73	13.8	4.98	27.666	0.7653	Medium	13.64	13.71	4.634	25.745	0.6223	Medium	13.67	13.77	7.793	43.297	0.7889	Medium	13.67	13.76	7.774	43.188	0.7166	Medium	13.67	13.77	7.396	41.088	0.7032	Medium	13.67	13.76	11.896	66.089	0.8635	Medium	13.67
Omipalisib	558	571	IIATDPLNPLTAED	11.47	1	10	11.5	11.58	4.186	41.857	0.8087	Medium	11.51	11.59	4.372	43.716	0.8463	Medium	11.33	11.41	4.197	41.972	0.6948	Medium	11.42	11.51	5.865	58.651	0.8547	Medium	11.41	11.5	5.915	59.155	0.789	Medium	11.42	11.51	6.062	60.621	0.7234	Medium	11.41	11.51	7.311	73.109	0.7919	Medium	11.42
Omipalisib	558	573	IIATDPLNPLTAEDKE	10.38	2	12	10.49	10.57	4.732	39.43	0.7814	Medium	10.49	10.57	4.87	40.58	0.8305	Medium	10.5	10.58	4.845	40.378	0.7405	Medium	10.49	10.58	6.381	53.172	0.8081	Medium	10.49	10.57	6.37	53.082	0.8199	Medium	10.49	10.58	6.26	52.171	0.8117	Medium	10.49	10.57	8.272	68.934	0.8139	Medium	10.53
Omipalisib	558	578	IIATDPLNPLTAEDKELLWHF	13.68	3	17	13.64	13.72	5.075	29.853	0.8702	Medium	13.74	13.82	4.9	28.826	0.8826	Medium	13.63	13.71	4.544	26.731	0.8605	Medium	13.49	13.96	7.118	41.873	0.9285	High	13.48	13.95	7.194	42.319	0.8454	Medium	13.49	13.96	6.838	40.222	0.8877	Medium	13.49	13.96	10.858	63.871	0.9137	High	13.49
Omipalisib	559	573	IATDPLNPLTAEDKE	9.92	2	11	9.87	9.89	4.868	44.256	0.6595	Medium	9.87	9.89	5.882	53.47	0.6129	Medium	9.87	9.9	4.147	37.698	0.7258	Medium	9.87	9.9	6.341	57.649	0.7103	Medium	9.86	9.89	6.169	56.078	0.7379	Medium	9.87	9.9	5.911	53.738	0.755	Medium	9.87	9.89	8.326	75.688	0.738	Medium	9.87
Omipalisib	574	578	LLWHF	13.11	2	3	13.17	13.25	0.434	14.452	0.9353	High	13.18	13.27	0.375	12.504	0.9095	High	13.1	13.18	0.358	11.939	0.9232	High	13.1	13.18	0.816	27.217	0.9079	High	13.1	13.17	0.79	26.347	0.9124	High	13.1	13.18	0.756	25.209	0.938	High	13.16	13.23	1.576	52.549	0.9108	High	13.19
Omipalisib	579	592	RYESLKHPKAYPKL	6.32	4	10	6.54	6.62	2.016	20.164	0.9306	High	6.52	6.59	1.971	19.711	0.9266	High	6.22	6.3	1.813	18.133	0.8503	Medium	6.37	6.47	3.692	36.925	0.9114	High	6.33	6.4	3.541	35.406	0.8717	Medium	6.27	6.35	3.853	38.535	0.8546	Medium	6.37	6.47	5.42	54.201	0.8629	Medium	6.37
Omipalisib	602	607	EIVAKT	4.54	1	4	4.65	4.72	0.876	21.902	0.8679	Medium	4.69	4.77	0.946	23.656	0.8412	Medium	4.77	4.85	0.812	20.296	0.9032	Medium	4.6	4.69	1.816	45.41	0.923	Medium	4.6	4.69	1.74	43.508	0.9372	Medium	4.6	4.69	1.835	45.874	0.9277	Medium	4.6	4.69	3.286	82.149	0.9298	Medium	4.6
Omipalisib	611	622	LARREVWDQSAL	9.4	2	10	9.33	9.42	6.328	63.278	0.9031	Medium	9.33	9.42	6.232	62.318	0.8495	Medium	9.33	9.43	6.238	62.385	0.9073	Medium	9.33	9.43	6.743	67.426	0.9026	Medium	9.33	9.42	6.736	67.362	0.8904	Medium	9.33	9.43	6.614	66.138	0.8972	Medium	9.33	9.42	6.653	66.532	0.9081	High	9.33
Omipalisib	612	622	ARREVWDQSAL	9.08	3	9	9.13	9.22	5.82	64.664	0.9273	High	9.13	9.22	5.895	65.496	0.8651	Medium	9.13	9.22	5.817	64.636	0.9167	High	9.13	9.23	6.049	67.216	0.9306	High	9.13	9.22	6.107	67.856	0.9263	High	9.13	9.23	6.002	66.686	0.9193	High	9.13	9.22	5.987	66.519	0.9448	High	9.13
Omipalisib	623	630	DVGLTMQL	11.91	2	6	12.11	12.18	1.39	23.164	0.7939	Medium	12.11	12.19	1.693	28.212	0.7883	Medium	12.1	12.17	1.135	18.916	0.8582	Medium	12.25	12.32	2.085	34.745	0.8509	Medium	12.12	12.2	1.857	30.942	0.804	Medium	12.11	12.19	1.863	31.048	0.843	Medium	12.11	12.19	3.724	62.065	0.8362	Medium	12.11
Omipalisib	631	635	LDCNF	10.64	1	3	10.67	10.78	0.542	18.071	0.899	Medium	10.82	10.89	0.639	21.309	0.8317	Medium	10.78	10.85	0.503	16.766	0.9152	Medium	10.69	10.77	1.155	38.488	0.9101	Medium	10.68	10.76	1.121	37.364	0.9381	Medium	10.69	10.77	1.097	36.559	0.939	Medium	10.68	10.77	1.935	64.497	0.931	Medium	10.69
Omipalisib	636	642	SDENVRA	4.34	1	5	4.36	4.39	0.964	19.278	0.8173	Medium	4.41	4.5	0.921	18.423	0.8512	Medium	4.36	4.4	0.824	16.489	0.8301	Medium	4.36	4.4	1.258	25.155	0.8651	Medium	4.36	4.4	1.197	23.95	0.8455	Medium	4.36	4.4	1.19	23.794	0.896	Medium	4.36	4.39	2.439	48.775	0.8814	Medium	4.36
Omipalisib	643	650	IAVQKLES	6.86	1	6	6.85	6.86	0.758	12.628	0.802	Medium	6.85	6.86	0.824	13.74	0.7477	Medium	6.85	6.86	0.807	13.452	0.8214	Medium	6.85	6.87	1.067	17.781	0.8164	Medium	6.85	6.87	1.038	17.303	0.7859	Medium	6.85	6.87	1.02	17.006	0.783	Medium	6.85	6.86	1.641	27.348	0.7548	Medium	6.85
Omipalisib	643	651	IAVQKLESL	9.62	1	7	9.43	9.8	0.79	11.287	0.8659	Medium	9.43	9.8	0.837	11.953	0.8003	Medium	9.43	9.8	0.784	11.197	0.8894	Medium	9.43	9.8	1.102	15.739	0.8439	Medium	9.43	9.8	1.018	14.541	0.8723	Medium	9.44	9.8	1.046	14.938	0.8853	Medium	9.43	9.8	1.749	24.985	0.8283	Medium	9.43
Omipalisib	643	654	IAVQKLESLEDD	9.34	2	10	9.26	9.35	1.649	16.49	0.8729	Medium	9.26	9.35	1.739	17.388	0.8547	Medium	9.27	9.35	1.637	16.371	0.895	Medium	9.27	9.35	2.359	23.591	0.8815	Medium	9.26	9.34	2.488	24.881	0.8992	Medium	9.27	9.35	2.387	23.875	0.9014	Medium	9.26	9.35	3.281	32.813	0.886	Medium	9.27
Omipalisib	643	657	IAVQKLESLEDDDVL	11.41	2	13	11.21	11.5	1.725	13.269	0.7932	Medium	11.21	11.5	1.84	14.152	0.7714	Medium	11.21	11.5	1.669	12.842	0.8007	Medium	11.21	11.5	2.457	18.897	0.8102	Medium	11.21	11.49	2.532	19.477	0.7698	Medium	11.21	11.5	2.348	18.06	0.7935	Medium	11.21	11.5	3.326	25.582	0.7862	Medium	11.21
Omipalisib	652	657	EDDDVL	9.03	1	4	9.09	9.17	0.155	3.882	0.7968	Medium	9.23	9.31	0.174	4.352	0.6972	Medium	9.16	9.23	0.141	3.521	0.8543	Medium	9.09	9.17	0.167	4.182	0.8598	Medium	9.18	9.25	0.226	5.641	0.7539	Medium	9.09	9.17	0.3	7.499	0.8811	Medium	9.09	9.17	0.563	14.074	0.8614	Medium	9.09
Omipalisib	654	662	DDVLHYLLQ	12.91	2	7	12.91	13.01	0.156	2.235	0.7116	Medium	12.91	13.02	0.109	1.559	0.7052	Medium	12.91	13.02	0.092	1.321	0.7686	Medium	12.91	13.02	0.169	2.408	0.731	Medium	12.9	13.01	0.197	2.812	0.7644	Medium	12.91	13.02	0.225	3.219	0.7667	Medium	12.91	13.02	1.192	17.024	0.7117	Medium	12.91
Omipalisib	655	662	DVLHYLLQ	12.82	2	6	12.59	12.95	0.07	1.171	0.7844	Medium	12.59	12.95	0.079	1.314	0.7411	Medium	12.59	12.95	0.051	0.857	0.7738	Medium	12.59	12.95	0.284	4.739	0.7257	Medium	12.58	12.95	0.222	3.693	0.7603	Medium	12.59	12.95	0.278	4.641	0.7835	Medium	12.59	12.95	1.298	21.626	0.8013	Medium	12.59
Omipalisib	655	663	DVLHYLLQL	14.29	2	7	14.17	14.52	0.082	1.174	0.8604	Medium	14.17	14.53	0.126	1.796	0.8262	Medium	14.18	14.53	0.096	1.367	0.8485	Medium	14.18	14.53	0.253	3.609	0.8667	Medium	14.17	14.52	0.314	4.489	0.8219	Medium	14.18	14.53	0.313	4.474	0.8354	Medium	14.17	14.53	1.392	19.883	0.8999	Medium	14.18
Omipalisib	658	665	HYLLQLVQ	11.67	2	6	11.66	11.68	0.08	1.333	0.6609	Medium	11.66	11.68	0.095	1.578	0.6712	Medium	11.66	11.68	0.129	2.155	0.8162	Medium	11.66	11.68	0.102	1.707	0.6593	Medium	11.65	11.68	0.188	3.137	0.757	Medium	11.66	11.68	0.188	3.131	0.8037	Medium	11.66	11.68	0.614	10.23	0.6675	Medium	11.66
Omipalisib	663	677	LVQAVKFEPYHDSAL	9.66	3	12	9.66	9.75	0.394	3.282	0.9284	High	9.66	9.75	0.5	4.164	0.9186	Medium	9.66	9.75	0.361	3.006	0.9322	High	9.66	9.75	0.734	6.116	0.9147	High	9.65	9.75	0.811	6.758	0.9385	High	9.66	9.75	0.786	6.55	0.9355	High	9.66	9.75	1.045	8.71	0.9067	Medium	9.66
Omipalisib	664	677	VQAVKFEPYHDSAL	9.26	2	11	9.11	9.52	0.439	3.994	0.9042	Medium	9.11	9.52	0.51	4.635	0.9119	Medium	9.12	9.53	0.41	3.726	0.9089	Medium	9.12	9.53	0.815	7.407	0.9182	Medium	9.11	9.52	0.822	7.476	0.9306	Medium	9.12	9.53	0.823	7.485	0.929	Medium	9.11	9.52	1.024	9.31	0.9053	Medium	9.12
Omipalisib	666	677	AVKFEPYHDSAL	8.87	2	9	8.86	8.95	0.407	4.521	0.8408	Medium	8.92	9	0.484	5.38	0.7896	Medium	8.86	8.96	0.38	4.218	0.8326	Medium	8.86	8.96	0.838	9.312	0.8761	Medium	8.86	8.95	0.86	9.554	0.7996	Medium	8.86	8.96	0.827	9.183	0.8577	Medium	8.86	8.95	0.994	11.044	0.8928	Medium	8.86
Omipalisib	681	697	LLKRGLRNKRIGHFLFW	10.27	5	15	10.49	10.58	0.075	0.503	0.9528	High	10.49	10.58	0.021	0.139	0.9272	Medium	10.49	10.58	0.044	0.295	0.9444	High	10.49	10.58	0.095	0.631	0.942	High	10.49	10.58	0.007	0.048	0.9051	Medium	10.49	10.58	0.014	0.092	0.9385	High	10.49	10.58	0.19	1.268	0.9492	High	10.49
Omipalisib	698	713	FLRSEIAQSRHYQQRF	7.69	4	14	7.52	7.93	0.673	4.81	0.8861	Medium	7.52	7.93	0.59	4.215	0.858	Medium	7.52	7.93	0.63	4.499	0.8637	Medium	7.52	7.93	1.04	7.426	0.8966	Medium	7.52	7.93	0.936	6.686	0.8861	Medium	7.52	7.93	0.881	6.295	0.8785	Medium	7.52	7.93	2.391	17.077	0.8848	Medium	7.52
Omipalisib	700	713	RSEIAQSRHYQQRF	5.79	4	12	5.77	6.29	0.615	5.123	0.9227	High	5.77	6.29	0.408	3.401	0.9077	High	5.77	6.29	0.416	3.466	0.9357	High	5.77	6.3	0.836	6.97	0.9313	High	5.77	6.3	0.721	6.012	0.9323	High	5.77	6.29	0.654	5.45	0.929	High	5.77	6.29	2.127	17.728	0.9245	High	5.77
Omipalisib	714	719	AVILEA	9.26	1	4	9.19	9.33	0.038	0.959	0.8703	Medium	9.19	9.33	0.054	1.353	0.8486	Medium	9.19	9.33	0.028	0.693	0.8667	Medium	9.19	9.33	0.016	0.403	0.8634	Medium	9.18	9.33	0.038	0.944	0.8442	Medium	9.19	9.33	0.032	0.806	0.8566	Medium	9.19	9.33	0.037	0.916	0.8405	Medium	9.19
Omipalisib	720	729	YLRGCGTAML	9.99	2	8	10.04	10.09	0.193	2.412	0.8939	Medium	10.04	10.1	0.246	3.071	0.8638	Medium	10.04	10.1	0.191	2.382	0.8889	Medium	10.04	10.1	0.661	8.262	0.9	Medium	10.03	10.09	0.655	8.186	0.9133	Medium	10.04	10.1	0.621	7.765	0.9279	Medium	10.04	10.1	1.216	15.198	0.8981	Medium	10.04
Omipalisib	729	737	LHDFTQQVQ	7.59	2	7	7.46	7.65	0.101	1.446	0.8272	Medium	7.46	7.65	0.267	3.818	0.7455	Medium	7.46	7.65	0.093	1.33	0.8447	Medium	7.46	7.66	0.112	1.6	0.8763	Medium	7.46	7.66	0.099	1.412	0.8517	Medium	7.46	7.66	0.107	1.525	0.8638	Medium	7.46	7.65	0.108	1.549	0.8138	Medium	7.46
Omipalisib	732	737	FTQQVQ	5.63	1	4	5.57	5.69	0.191	4.771	0.8229	Medium	5.57	5.69	0.168	4.21	0.7422	Medium	5.63	5.71	0.132	3.305	0.8708	Medium	5.57	5.69	0.048	1.192	0.8614	Medium	5.57	5.69	0.064	1.611	0.8826	Medium	5.57	5.69	0.119	2.976	0.8651	Medium	5.57	5.69	0.027	0.684	0.8593	Medium	5.57
Omipalisib	732	738	FTQQVQV	8.12	1	5	8.23	8.31	0.028	0.551	0.8385	Medium	8.26	8.33	0.043	0.855	0.9028	Medium	8.26	8.34	0.087	1.74	0.8776	Medium	8.18	8.26	0.056	1.111	0.797	Medium	8.18	8.26	0.082	1.633	0.9009	Medium	8.18	8.26	0.177	3.546	0.8272	Medium	8.17	8.26	0.05	0.996	0.8108	Medium	8.18
Omipalisib	742	747	LQKVTL	8.23	1	4	8.2	8.33	0.2	4.995	0.9529	Medium	8.2	8.33	0.188	4.711	0.9496	Medium	8.2	8.33	0.194	4.861	0.9437	Medium	8.2	8.34	0.931	23.287	0.9416	Medium	8.2	8.34	0.92	22.997	0.949	Medium	8.2	8.34	0.916	22.905	0.9453	Medium	8.2	8.33	2.045	51.129	0.9275	Medium	8.2
Omipalisib	748	761	DIKSLSAEKYDVSS	8	2	12	7.87	8.2	9.486	79.053	0.8559	Medium	7.87	8.2	9.712	80.936	0.862	Medium	7.87	8.2	9.432	78.6	0.9007	High	7.87	8.2	9.75	81.247	0.8932	High	7.87	8.2	9.49	79.085	0.9309	High	7.87	8.2	9.488	79.064	0.9145	High	7.87	8.2	9.686	80.719	0.8951	High	7.87
Omipalisib	748	767	DIKSLSAEKYDVSSQVISQL	11.14	3	18	10.94	11.34	14.065	78.137	0.8466	Medium	10.94	11.35	14.157	78.651	0.8469	Medium	10.95	11.35	13.864	77.022	0.8953	Medium	10.95	11.35	14.197	78.875	0.8739	Medium	10.94	11.34	14.441	80.23	0.9022	Medium	10.95	11.35	14.275	79.303	0.8772	Medium	10.94	11.35	14.169	78.719	0.881	Medium	10.95
Omipalisib	748	782	DIKSLSAEKYDVSSQVISQLKQKLENLQNSQLPES	12.49	5	32	12.23	12.75	18.502	57.819	0.8565	Medium	12.24	12.76	18.911	59.097	0.8289	Medium	12.24	12.76	18.576	58.048	0.8908	High	12.24	12.76	23.784	74.324	0.9011	High	12.23	12.75	23.808	74.402	0.8773	High	12.24	12.76	23.642	73.881	0.8816	High	12.24	12.76	25.412	79.412	0.8802	High	12.24
Omipalisib	755	782	EKYDVSSQVISQLKQKLENLQNSQLPES	12.1	3	25	12.12	12.21	13.295	53.182	0.8234	Medium	12.12	12.21	13.084	52.335	0.7485	Medium	12.12	12.21	13.206	52.824	0.8367	Medium	12.12	12.21	18.211	72.846	0.8173	Medium	12.11	12.21	18.403	73.614	0.7728	Medium	12.12	12.21	18.084	72.337	0.8435	Medium	12.12	12.21	20.215	80.858	0.8346	Medium	12.12
Omipalisib	762	782	QVISQLKQKLENLQNSQLPES	10.6	2	18	10.41	10.73	8.925	49.585	0.8694	Medium	10.41	10.73	9.109	50.603	0.8859	Medium	10.42	10.74	8.841	49.119	0.9111	Medium	10.42	10.74	14.073	78.186	0.8367	Medium	10.41	10.73	14.019	77.882	0.8721	Medium	10.42	10.74	13.899	77.216	0.8875	Medium	10.41	10.73	15.775	87.638	0.836	Medium	10.42
Omipalisib	767	782	LKQKLENLQNSQLPES	7.51	2	13	7.36	7.61	4.791	36.854	0.8565	Medium	7.36	7.61	4.918	37.831	0.86	Medium	7.36	7.61	4.689	36.069	0.8927	Medium	7.36	7.61	8.369	64.375	0.868	Medium	7.36	7.61	8.391	64.544	0.8979	Medium	7.36	7.61	8.2	63.073	0.8779	Medium	7.36	7.61	10.206	78.509	0.8843	Medium	7.36
Omipalisib	768	782	KQKLENLQNSQLPES	7.13	2	12	6.96	7.45	4.525	37.709	0.9494	High	6.96	7.45	4.623	38.523	0.9502	High	6.97	7.45	4.506	37.55	0.9509	High	6.97	7.45	7.622	63.518	0.9495	High	6.97	7.45	7.708	64.232	0.9556	High	6.97	7.45	7.615	63.458	0.9404	High	6.96	7.45	9.463	78.854	0.9392	High	6.97
Omipalisib	783	796	FRVPYDPGLKAGAL	10.16	3	10	10.22	10.3	0.225	2.25	0.8937	High	10.22	10.31	0.339	3.387	0.8979	High	10.22	10.31	0.234	2.338	0.9	High	10.22	10.31	0.417	4.173	0.9095	High	10.22	10.3	0.459	4.586	0.9123	High	10.22	10.31	0.41	4.096	0.9078	High	10.22	10.31	1.605	16.053	0.9127	High	10.22
Omipalisib	797	812	AIEKCKVMASKKKPLW	6.81	4	13	6.98	7.06	2.572	19.787	0.931	Medium	6.98	7.07	2.079	15.991	0.944	Medium	6.98	7.07	2.023	15.561	0.9493	Medium	6.98	7.07	2.941	22.621	0.8956	Medium	6.91	6.98	2.411	18.544	0.9524	Medium	6.98	7.07	2.297	17.669	0.9356	Medium	6.98	7.07	4.481	34.466	0.8669	Medium	6.98
Omipalisib	797	815	AIEKCKVMASKKKPLWLEF	10.45	2	16	10.29	10.72	2.165	13.531	0.8627	Medium	10.29	10.72	1.509	9.431	0.8669	Medium	10.29	10.72	1.41	8.815	0.9168	Medium	10.29	10.72	2.516	15.727	0.8926	Medium	10.28	10.71	1.733	10.833	0.9092	Medium	10.29	10.72	1.623	10.146	0.9029	Medium	10.29	10.72	4.015	25.094	0.8727	Medium	10.29
Omipalisib	802	815	KVMASKKKPLWLEF	10.71	4	11	10.97	11.03	1.097	9.975	0.7629	Medium	10.86	10.94	0.929	8.445	0.8623	Medium	10.86	10.95	0.792	7.198	0.9071	Medium	10.72	10.79	1.111	10.102	0.7195	Medium	10.86	10.94	1.013	9.208	0.8872	Medium	10.86	10.95	0.879	7.987	0.9013	Medium	10.77	10.84	1.838	16.71	0.8842	Medium	10.79
Omipalisib	816	823	KCADPTAL	7.06	1	5	6.88	7.17	1.114	22.28	0.884	Medium	6.88	7.17	1.391	27.822	0.8666	Medium	6.88	7.18	1.089	21.775	0.8965	Medium	6.88	7.18	2.614	52.274	0.8941	Medium	6.88	7.18	2.646	52.913	0.899	Medium	6.88	7.18	2.62	52.394	0.8926	Medium	6.88	7.17	3.612	72.249	0.8634	Medium	6.88
Omipalisib	816	825	KCADPTALSN	5.74	2	7	5.69	5.78	2.668	38.12	0.9048	Medium	5.74	5.81	2.805	40.067	0.8782	Medium	5.69	5.78	2.578	36.821	0.9274	Medium	5.69	5.78	4.178	59.691	0.9318	Medium	5.69	5.78	4.259	60.848	0.9351	Medium	5.69	5.78	4.178	59.679	0.9307	Medium	5.69	5.78	5.355	76.504	0.9178	Medium	5.69
Omipalisib	816	829	KCADPTALSNETIG	8.17	2	11	8.01	8.42	3.667	33.335	0.8394	Medium	8.01	8.43	4.077	37.064	0.8152	Medium	8.02	8.43	3.853	35.027	0.8723	Medium	8.02	8.43	5.953	54.122	0.8718	Medium	8.02	8.43	5.956	54.144	0.899	Medium	8.02	8.43	5.933	53.94	0.8774	Medium	8.01	8.43	7.409	67.352	0.8263	Medium	8.02
Omipalisib	816	842	KCADPTALSNETIGIIFKHGDDLRQDM	11.89	5	24	12.01	12.08	3.6	15.002	0.8795	High	12.01	12.08	3.767	15.694	0.818	Medium	12.01	12.08	3.686	15.358	0.9094	High	12.01	12.08	6.063	25.263	0.8836	High	12.01	12.07	6.103	25.43	0.8408	Medium	12.01	12.08	5.919	24.662	0.8867	High	12.01	12.08	8.264	34.433	0.844	Medium	12.01
Omipalisib	824	829	SNETIG	5.53	1	4	5.54	5.62	1.387	34.682	0.7421	Medium	5.54	5.62	1.457	36.435	0.6948	Medium	5.54	5.62	1.371	34.286	0.7844	Medium	5.54	5.62	2.058	51.452	0.7996	Medium	5.54	5.62	2.076	51.9	0.8343	Medium	5.52	5.59	2.001	50.035	0.8193	Medium	5.54	5.62	2.35	58.744	0.8654	Medium	5.54
Omipalisib	824	842	SNETIGIIFKHGDDLRQDM	10.75	4	17	10.86	10.94	0.843	4.958	0.8686	Medium	10.86	10.94	0.692	4.072	0.8745	Medium	10.86	10.95	0.677	3.984	0.9158	Medium	10.86	10.95	2.019	11.874	0.868	Medium	10.86	10.94	1.822	10.717	0.8667	Medium	10.86	10.95	1.756	10.327	0.8921	Medium	10.86	10.94	3.422	20.129	0.8267	Medium	10.86
Omipalisib	844	848	ILQIL	12.17	1	3	12.2	12.28	0.017	0.571	0.9388	Medium	12.2	12.29	0.032	1.063	0.9034	Medium	12.2	12.29	0.031	1.02	0.8994	Medium	12.2	12.29	0.014	0.453	0.9428	Medium	12.2	12.28	0.005	0.171	0.9249	Medium	12.2	12.29	0.029	0.957	0.9205	Medium	12.2	12.29	0.016	0.548	0.9366	Medium	12.2
Omipalisib	849	855	RIMESIW	11.65	2	5	11.55	11.62	0.052	1.04	0.6593	Medium	11.6	11.68	0.14	2.807	0.6419	Medium	11.6	11.68	0.127	2.544	0.7476	Medium	11.6	11.68	0.09	1.808	0.8125	Medium	11.59	11.68	0.044	0.876	0.7291	Medium	11.6	11.68	0.131	2.621	0.7704	Medium	11.6	11.68	0.114	2.281	0.8364	Medium	11.6
Omipalisib	849	862	RIMESIWETESLDL	13.25	2	12	13.17	13.39	0.524	4.366	0.8104	Medium	13.18	13.39	0.492	4.102	0.8509	Medium	13.18	13.4	0.466	3.881	0.9017	Medium	13.18	13.4	0.946	7.886	0.8386	Medium	13.17	13.39	0.96	8.001	0.8959	Medium	13.18	13.4	0.872	7.266	0.8805	Medium	13.18	13.39	1.928	16.066	0.841	Medium	13.18
Omipalisib	853	862	SIWETESLDL	13.27	2	8	13.36	13.42	0.302	3.775	0.8156	Medium	13.36	13.42	0.394	4.923	0.8348	Medium	13.36	13.42	0.327	4.093	0.8972	Medium	13.36	13.42	0.822	10.275	0.8521	Medium	13.36	13.42	0.772	9.653	0.7815	Medium	13.36	13.42	0.716	8.956	0.8614	Medium	13.36	13.42	1.755	21.934	0.8505	Medium	13.36
Omipalisib	862	878	LCLLPYGCISTGDKIGM	13.06	3	14	12.96	13.06	0.051	0.364	0.7049	Medium	12.97	13.06	0.076	0.546	0.6959	Medium	12.97	13.06	0.024	0.171	0.7592	Medium	13.04	13.12	0.273	1.95	0.7671	Medium	12.96	13.05	0.363	2.596	0.808	Medium	12.97	13.06	0.342	2.44	0.8184	Medium	12.97	13.06	1.326	9.474	0.7756	Medium	12.97
Omipalisib	863	869	CLLPYGC	11.86	1	4	11.77	11.87	0.115	2.863	0.761	Medium	11.77	11.87	0.076	1.893	0.8452	Medium	11.78	11.87	0.098	2.457	0.7907	Medium	11.78	11.87	0.212	5.312	0.8043	Medium	11.77	11.86	0.193	4.817	0.8519	Medium	11.78	11.87	0.215	5.386	0.8145	Medium	11.77	11.87	0.752	18.809	0.8142	Medium	11.78
Omipalisib	863	878	CLLPYGCISTGDKIGM	12.04	2	13	11.9	12.48	0.356	2.739	0.8931	Medium	11.9	12.48	0.367	2.823	0.9265	Medium	11.9	12.48	0.384	2.956	0.9127	Medium	11.9	12.48	0.532	4.09	0.9235	Medium	11.9	12.48	0.573	4.408	0.9392	Medium	11.9	12.48	0.497	3.826	0.9175	Medium	11.9	12.48	1.558	11.987	0.909	Medium	11.9
Omipalisib	863	880	CLLPYGCISTGDKIGMIE	12.38	2	15	12.39	12.49	0.446	2.974	0.8518	Medium	12.4	12.49	0.31	2.066	0.9097	High	12.4	12.49	0.33	2.201	0.9371	High	12.4	12.49	0.465	3.098	0.8514	High	12.39	12.48	0.487	3.246	0.9084	High	12.4	12.49	0.437	2.91	0.9081	Medium	12.4	12.49	1.447	9.649	0.8859	High	12.4
Omipalisib	865	878	LPYGCISTGDKIGM	10.57	2	12	10.35	10.72	0.459	3.821	0.6628	Medium	10.35	10.72	0.487	4.056	0.6844	Medium	10.35	10.73	0.446	3.716	0.7306	Medium	10.35	10.73	0.613	5.111	0.7086	Medium	10.34	10.72	0.667	5.555	0.7341	Medium	10.35	10.73	0.505	4.206	0.7349	Medium	10.35	10.73	1.54	12.834	0.6873	Medium	10.35
Omipalisib	879	887	IEIVKDATT	7.08	1	7	7.02	7.39	1.199	17.129	0.9264	Medium	7.02	7.39	1.185	16.931	0.9351	Medium	7.02	7.39	1.215	17.352	0.9176	Medium	7.03	7.39	1.869	26.702	0.9286	High	7.03	7.4	1.862	26.601	0.9367	High	7.03	7.39	1.891	27.011	0.9053	High	7.02	7.39	2.886	41.233	0.9097	Medium	7.03
Omipalisib	879	889	IEIVKDATTIA	9.23	1	9	9.03	9.3	1.278	14.2	0.906	Medium	9.03	9.3	1.286	14.284	0.8884	Medium	9.03	9.3	1.258	13.983	0.881	Medium	9.03	9.3	2.027	22.522	0.9021	Medium	9.02	9.29	2.178	24.202	0.8591	Medium	9.03	9.3	2.026	22.516	0.8944	Medium	9.03	9.3	3.052	33.911	0.8564	Medium	9.03
Omipalisib	881	901	IVKDATTIAKIQQSTVGNTGA	8.37	3	19	8.26	8.55	7.395	38.92	0.8325	Medium	8.26	8.55	7.41	38.998	0.8364	Medium	8.26	8.55	7.388	38.882	0.8787	Medium	8.26	8.55	8.31	43.738	0.8683	Medium	8.26	8.55	8.285	43.605	0.9205	Medium	8.26	8.55	8.193	43.123	0.8807	Medium	8.26	8.55	9.487	49.93	0.8296	Medium	8.26
Omipalisib	888	902	IAKIQQSTVGNTGAF	8.64	2	13	8.53	8.62	7.069	54.377	0.8028	Medium	8.53	8.62	7.081	54.471	0.7386	Medium	8.54	8.62	7.182	55.246	0.823	Medium	8.54	8.62	7.983	61.404	0.85	Medium	8.54	8.62	8.164	62.801	0.8721	Medium	8.54	8.62	7.969	61.298	0.8643	Medium	8.53	8.62	8.571	65.928	0.8755	Medium	8.54
Omipalisib	888	907	IAKIQQSTVGNTGAFKDEVL	9.51	3	18	9.55	9.62	7.338	40.768	0.8457	Medium	9.55	9.62	7.249	40.275	0.8353	Medium	9.55	9.62	7.353	40.85	0.8823	Medium	9.55	9.62	8.759	48.661	0.8405	Medium	9.55	9.61	8.965	49.804	0.8886	Medium	9.55	9.62	8.555	47.528	0.8783	Medium	9.55	9.62	9.946	55.255	0.8563	Medium	9.55
Omipalisib	902	910	FKDEVLNHW	10.1	3	7	9.96	10.28	0.204	2.91	0.8607	Medium	9.96	10.28	0.156	2.232	0.8401	Medium	9.96	10.28	0.142	2.027	0.9143	Medium	9.96	10.28	0.349	4.98	0.8928	Medium	9.96	10.28	0.321	4.586	0.8876	Medium	9.96	10.28	0.335	4.783	0.9031	Medium	9.96	10.28	0.984	14.052	0.909	Medium	9.96
Omipalisib	902	924	FKDEVLNHWLKEKSPTEEKFQAA	9.54	4	20	9.4	9.78	1.611	8.055	0.8348	Medium	9.4	9.78	1.504	7.522	0.8056	Medium	9.4	9.79	1.451	7.255	0.8751	Medium	9.4	9.79	2.643	13.217	0.8498	Medium	9.39	9.78	2.537	12.686	0.8787	Medium	9.4	9.79	2.376	11.881	0.8711	Medium	9.4	9.78	4.218	21.09	0.8209	Medium	9.4
Omipalisib	908	924	NHWLKEKSPTEEKFQAA	7.08	3	14	7.01	7.23	1.734	12.386	0.744	Medium	7.01	7.23	1.401	10.007	0.6971	Medium	7.02	7.23	1.577	11.267	0.8152	Medium	7.02	7.24	2.561	18.293	0.8335	Medium	7.02	7.24	2.338	16.699	0.8447	Medium	7.02	7.24	2.433	17.377	0.843	Medium	7.01	7.23	3.584	25.598	0.8141	Medium	7.02
Omipalisib	925	934	VERFVYSCAG	9.08	1	8	9.1	9.17	0.146	1.819	0.8897	High	9.11	9.17	0.176	2.196	0.8637	Medium	9.11	9.17	0.075	0.939	0.8537	Medium	9.11	9.17	0.167	2.085	0.8841	High	9.1	9.17	0.007	0.091	0.8336	Medium	9.11	9.17	0.157	1.956	0.88	Medium	9.1	9.17	0.186	2.325	0.8774	High	9.11
Omipalisib	927	934	RFVYSCAG	8.29	1	6	8.29	8.36	0.164	2.728	0.8399	Medium	8.29	8.36	0.102	1.705	0.8519	High	8.29	8.36	0.1	1.664	0.87	High	8.29	8.36	0.123	2.046	0.8588	High	8.29	8.36	0.067	1.112	0.9115	High	8.29	8.36	0.109	1.823	0.8941	High	8.29	8.36	0.082	1.369	0.8193	Medium	8.29
Omipalisib	935	939	YCVAT	6.8	1	3	6.82	6.91	0.027	0.894	0.9003	Medium	6.82	6.91	0.029	0.983	0.8643	Medium	6.82	6.92	0.018	0.607	0.9113	Medium	6.82	6.92	0.029	0.966	0.9285	Medium	6.82	6.92	0.027	0.907	0.9298	Medium	6.82	6.92	0.022	0.747	0.9139	Medium	6.82	6.91	0.019	0.627	0.928	High	6.82
Omipalisib	940	953	FVLGIGDRHNDNIM	10.54	3	12	10.61	10.7	0.177	1.479	0.9215	High	10.61	10.7	0.151	1.255	0.9072	High	10.61	10.7	0.157	1.312	0.9044	High	10.61	10.7	0.329	2.74	0.929	High	10.6	10.7	0.294	2.452	0.9196	High	10.61	10.7	0.298	2.484	0.9112	High	10.61	10.7	0.895	7.457	0.9054	High	10.61
Omipalisib	954	960	ITETGNL	7.56	1	5	7.7	7.79	0.232	4.648	0.8788	Medium	7.7	7.8	0.248	4.959	0.8947	Medium	7.7	7.8	0.186	3.717	0.9129	Medium	7.71	7.8	0.744	14.871	0.9039	Medium	7.71	7.8	0.719	14.374	0.9007	Medium	7.71	7.8	0.697	13.944	0.9032	Medium	7.7	7.8	1.226	24.518	0.8843	Medium	7.71
Omipalisib	954	961	ITETGNLF	11.33	1	6	11.19	11.28	0.264	4.393	0.8464	Medium	11.19	11.28	0.292	4.865	0.739	Medium	11.19	11.28	0.373	6.22	0.7873	Medium	11.19	11.28	0.801	13.351	0.8566	Medium	11.18	11.28	0.83	13.833	0.7971	Medium	11.19	11.28	0.763	12.717	0.8048	Medium	11.19	11.28	1.203	20.042	0.8833	Medium	11.26
Omipalisib	954	975	ITETGNLFHIDFGHILGNYKSF	13.27	3	20	13.22	13.31	4.36	21.8	0.8312	Medium	13.28	13.34	4.444	22.221	0.7531	Medium	13.3	13.37	4.718	23.588	0.8221	Medium	13.23	13.31	5.968	29.841	0.8508	Medium	13.22	13.31	6.351	31.754	0.8362	Medium	13.23	13.31	6.131	30.656	0.8233	Medium	13.23	13.31	6.375	31.877	0.8455	Medium	13.23
Omipalisib	954	976	ITETGNLFHIDFGHILGNYKSFL	13.82	4	21	13.73	14.05	5.424	25.826	0.7546	Medium	13.73	14.05	4.848	23.085	0.7084	Medium	13.73	14.05	5.764	27.446	0.7563	Medium	13.73	14.05	7.086	33.742	0.7956	Medium	13.73	14.04	7.44	35.427	0.694	Medium	13.73	14.05	7.028	33.467	0.7286	Medium	13.73	14.05	7.47	35.569	0.8249	Medium	13.73
Omipalisib	954	992	ITETGNLFHIDFGHILGNYKSFLGINKERVPFVLTPDFL	13.93	5	35	13.94	14.04	8.226	23.504	0.864	Medium	13.94	14.04	7.843	22.409	0.8266	Medium	13.94	14.04	8.493	24.266	0.8552	Medium	13.94	14.04	10.603	30.295	0.8822	High	13.94	14.04	11.13	31.8	0.8196	Medium	13.94	14.04	10.087	28.821	0.8356	Medium	13.94	14.04	11.245	32.128	0.8635	High	13.94
Omipalisib	961	972	FHIDFGHILGNY	12.72	3	10	12.54	12.97	2.333	23.331	0.8998	Medium	12.54	12.97	1.646	16.457	0.9053	Medium	12.54	12.98	2.568	25.685	0.9204	Medium	12.54	12.98	3.757	37.575	0.8794	Medium	12.53	12.97	3.774	37.738	0.9101	Medium	12.54	12.98	3.684	36.835	0.9112	Medium	12.54	12.97	4.082	40.823	0.8781	Medium	12.54
Omipalisib	961	975	FHIDFGHILGNYKSF	12.39	4	13	12.33	12.5	4.427	34.053	0.8287	Medium	12.54	12.6	4.269	32.842	0.7554	Medium	12.51	12.58	4.649	35.761	0.8817	Medium	12.33	12.51	5.944	45.723	0.8448	Medium	12.32	12.5	5.979	45.99	0.8324	Medium	12.33	12.51	5.792	44.553	0.895	Medium	12.33	12.5	6.248	48.062	0.8454	Medium	12.33
Omipalisib	961	976	FHIDFGHILGNYKSFL	13.36	4	14	13.2	13.62	4.964	35.458	0.761	Medium	13.2	13.62	4.826	34.469	0.7773	Medium	13.2	13.62	5.666	40.473	0.8498	Medium	13.2	13.62	6.838	48.841	0.7563	Medium	13.2	13.62	7.108	50.77	0.7963	Medium	13.2	13.62	6.836	48.831	0.8292	Medium	13.2	13.62	7.098	50.7	0.7626	Medium	13.2
Omipalisib	961	992	FHIDFGHILGNYKSFLGINKERVPFVLTPDFL	13.78	5	28	13.72	13.79	8.714	31.12	0.767	Medium	13.77	13.84	7.991	28.539	0.7383	Medium	13.72	13.8	8.438	30.137	0.7427	Medium	13.72	13.8	10.698	38.208	0.826	Medium	13.72	13.79	11.126	39.735	0.6785	Medium	13.72	13.8	10.208	36.456	0.724	Medium	13.72	13.8	11.487	41.025	0.8204	Medium	13.72
Omipalisib	962	975	HIDFGHILGNYKSF	11.38	3	12	11.3	11.39	4.908	40.898	0.793	Medium	11.3	11.39	4.807	40.058	0.783	Medium	11.31	11.39	5.047	42.056	0.8261	Medium	11.31	11.39	6.34	52.833	0.8212	Medium	11.3	11.38	6.289	52.408	0.829	Medium	11.31	11.39	6.254	52.12	0.8552	Medium	11.3	11.39	6.559	54.662	0.8292	Medium	11.31
Omipalisib	973	992	KSFLGINKERVPFVLTPDFL	12.87	4	16	12.79	12.86	4.327	27.042	0.9066	High	12.79	12.86	3.887	24.296	0.9064	High	12.79	12.87	3.73	23.312	0.91	High	12.79	12.87	4.961	31.004	0.8969	High	12.79	12.86	4.508	28.174	0.9049	High	12.79	12.87	4.284	26.773	0.9142	High	12.79	12.87	5.506	34.415	0.8942	High	12.79
Omipalisib	976	992	LGINKERVPFVLTPDFL	13.06	3	13	12.93	13.48	2.703	20.794	0.9373	High	12.93	13.48	2.546	19.581	0.9312	High	12.93	13.48	2.325	17.882	0.9378	High	12.93	13.48	3.229	24.837	0.9451	High	12.93	13.47	3.13	24.079	0.9396	High	12.93	13.48	2.889	22.223	0.9403	High	12.93	13.48	3.737	28.745	0.9124	High	12.93
Omipalisib	977	992	GINKERVPFVLTPDFL	12.98	3	12	12.75	13.2	1.919	15.992	0.9056	Medium	12.75	13.2	1.916	15.967	0.8981	Medium	12.75	13.2	1.721	14.34	0.9206	Medium	12.75	13.2	2.535	21.127	0.9094	Medium	12.74	13.2	2.461	20.511	0.9034	Medium	12.75	13.2	2.282	19.014	0.9165	Medium	12.75	13.2	2.967	24.726	0.9067	Medium	12.75
Omipalisib	993	1014	FVMGTSGKKTSPHFQKFQDICV	9.54	2	19	9.4	9.75	1.728	9.097	0.8554	Medium	9.4	9.75	1.177	6.193	0.8273	Medium	9.4	9.75	1.073	5.647	0.8996	Medium	9.4	9.75	2.291	12.056	0.8677	Medium	9.39	9.75	1.472	7.749	0.8933	Medium	9.4	9.75	1.349	7.098	0.8911	Medium	9.4	9.75	3.124	16.441	0.868	Medium	9.4
Omipalisib	1015	1026	KAYLALRHHTNL	6.32	2	10	6.3	6.54	0.373	3.728	0.8225	Medium	6.3	6.54	0.236	2.358	0.8676	Medium	6.3	6.55	0.238	2.384	0.9135	Medium	6.3	6.55	0.361	3.608	0.8563	Medium	6.3	6.55	0.279	2.788	0.8848	Medium	6.3	6.55	0.247	2.467	0.91	Medium	6.3	6.54	0.723	7.227	0.8673	Medium	6.3
Omipalisib	1015	1027	KAYLALRHHTNLL	7.62	4	11	7.74	7.81	0.28	2.548	0.8005	Medium	7.75	7.81	0.105	0.956	0.7967	Medium	7.75	7.81	0.104	0.946	0.8915	Medium	7.75	7.81	0.269	2.445	0.8301	Medium	7.75	7.82	0.191	1.732	0.8809	Medium	7.75	7.81	0.162	1.472	0.9011	Medium	7.74	7.81	0.706	6.415	0.8529	Medium	7.75
Omipalisib	1017	1026	YLALRHHTNL	6.64	3	8	6.79	6.85	0.314	3.919	0.9127	Medium	6.79	6.86	0.251	3.139	0.8927	Medium	6.79	6.86	0.237	2.959	0.9131	Medium	6.79	6.86	0.367	4.584	0.9173	Medium	6.79	6.86	0.275	3.444	0.9262	Medium	6.79	6.86	0.254	3.178	0.9347	Medium	6.79	6.86	0.689	8.618	0.9047	Medium	6.79
Omipalisib	1017	1027	YLALRHHTNLL	8.29	2	9	8.2	8.36	0.185	2.05	0.8015	Medium	8.2	8.37	0.154	1.717	0.66	Medium	8.2	8.37	0.131	1.45	0.7254	Medium	8.2	8.37	0.241	2.679	0.817	Medium	8.2	8.37	0.145	1.609	0.766	Medium	8.2	8.37	0.172	1.911	0.7363	Medium	8.2	8.37	0.533	5.927	0.7662	Medium	8.2
Omipalisib	1019	1026	ALRHHTNL	4.09	2	6	4.19	4.26	0.35	5.828	0.9006	Medium	4.19	4.26	0.291	4.851	0.8215	Medium	4.19	4.26	0.269	4.487	0.9079	Medium	4.19	4.26	0.414	6.893	0.9394	Medium	4.19	4.26	0.385	6.413	0.8573	Medium	4.19	4.26	0.347	5.779	0.9055	Medium	4.19	4.26	0.716	11.931	0.9136	Medium	4.19
Omipalisib	1019	1027	ALRHHTNLL	6.22	2	7	6.26	6.43	0.227	3.242	0.8779	Medium	6.26	6.44	0.208	2.97	0.8209	Medium	6.26	6.44	0.157	2.245	0.876	Medium	6.26	6.44	0.239	3.416	0.87	Medium	6.26	6.44	0.206	2.939	0.8563	Medium	6.26	6.44	0.175	2.505	0.8708	Medium	6.26	6.44	0.607	8.669	0.9097	Medium	6.26
Omipalisib	1031	1035	FSMML	13.4	1	3	13.28	13.5	0.031	1.048	0.8839	Medium	13.28	13.5	0.017	0.582	0.8553	Medium	13.29	13.51	0.055	1.823	0.8566	Medium	13.29	13.51	0.026	0.859	0.9061	Medium	13.28	13.5	0.008	0.272	0.8982	Medium	13.29	13.51	0.02	0.679	0.8959	Medium	13.28	13.5	0.043	1.429	0.8971	Medium	13.29
Omipalisib	1035	1042	LMTGMPQL	11.7	2	5	11.73	11.8	1.671	33.422	0.8276	Medium	11.69	11.76	1.698	33.956	0.634	Medium	11.69	11.76	1.745	34.904	0.7586	Medium	11.69	11.76	2.542	50.848	0.7534	Medium	11.71	11.78	2.66	53.197	0.7833	Medium	11.77	11.84	2.605	52.095	0.8615	Medium	11.69	11.76	3.351	67.015	0.8113	Medium	11.69
Omipalisib	1035	1050	LMTGMPQLTSKEDIEY	10.99	2	13	10.75	11.14	4.667	35.897	0.8205	Medium	10.75	11.14	4.265	32.804	0.8207	Medium	10.75	11.14	4.26	32.771	0.8806	Medium	10.75	11.14	6.94	53.387	0.8485	Medium	10.75	11.13	6.473	49.792	0.8782	Medium	10.75	11.14	6.149	47.302	0.8602	Medium	10.75	11.14	9.04	69.54	0.8777	Medium	10.75
Omipalisib	1036	1042	MTGMPQL	11.2	1	4	10.87	11.12	1.836	45.9	0.7789	Medium	10.87	11.12	1.707	42.677	0.7123	Medium	10.87	11.12	1.818	45.452	0.7887	Medium	10.87	11.12	2.84	71.009	0.8181	Medium	10.86	11.12	2.692	67.301	0.7448	Medium	10.87	11.12	2.827	70.675	0.7994	Medium	10.87	11.12	3.183	79.574	0.8225	Medium	10.87
Omipalisib	1050	1071	YIRDALTVGKNEEDAKKYFLDQ	9.72	4	20	9.77	9.87	2.504	12.522	0.9236	High	9.77	9.87	2.538	12.691	0.9079	High	9.77	9.87	2.429	12.143	0.9304	High	9.77	9.87	2.846	14.229	0.9272	High	9.76	9.86	2.782	13.908	0.9358	High	9.77	9.87	2.709	13.546	0.9349	High	9.77	9.87	3.435	17.177	0.9205	High	9.77
Omipalisib	1051	1069	IRDALTVGKNEEDAKKYFL	9.61	5	17	9.46	9.74	2.13	12.531	0.84	Medium	9.46	9.74	2.036	11.978	0.8331	Medium	9.46	9.75	1.949	11.464	0.8893	Medium	9.46	9.75	2.473	14.547	0.871	Medium	9.45	9.74	2.237	13.157	0.8754	Medium	9.46	9.75	2.144	12.61	0.8913	Medium	9.46	9.74	3.095	18.207	0.8521	Medium	9.46
Omipalisib	1051	1071	IRDALTVGKNEEDAKKYFLDQ	9.5	3	19	9.26	9.72	2.45	12.894	0.9021	Medium	9.26	9.72	2.463	12.965	0.8666	Medium	9.27	9.72	2.375	12.5	0.9145	High	9.27	9.72	2.798	14.728	0.9055	High	9.26	9.71	2.699	14.204	0.918	High	9.27	9.72	2.654	13.969	0.9157	High	9.26	9.72	3.331	17.532	0.8985	Medium	9.27
Omipalisib	1051	1073	IRDALTVGKNEEDAKKYFLDQIE	10.45	4	21	10.22	10.61	2.428	11.562	0.8314	Medium	10.22	10.62	2.405	11.451	0.7462	Medium	10.22	10.62	2.325	11.069	0.8211	Medium	10.22	10.62	2.781	13.241	0.8561	Medium	10.22	10.61	2.661	12.672	0.8592	Medium	10.22	10.62	2.52	11.998	0.8634	Medium	10.22	10.62	3.314	15.781	0.8071	Medium	10.22
Omipalisib	1072	1084	IEVCRDKGWTVQF	11.18	3	11	11.08	11.16	1.629	14.81	0.8869	High	11.05	11.12	1.75	15.905	0.6855	Medium	11.09	11.16	1.779	16.17	0.8814	Medium	11.09	11.16	4.628	42.074	0.9252	High	11.08	11.16	4.423	40.205	0.9239	High	11.09	11.16	4.398	39.985	0.9177	High	11.09	11.16	5.818	52.893	0.9241	High	11.09
Omipalisib	1088	1092	LHLVL	11.09	2	3	10.93	11	1.254	41.801	0.916	Medium	10.98	11.04	0.962	32.077	0.8951	Medium	10.94	11	1.334	44.483	0.9163	Medium	10.94	11	2.699	89.964	0.9017	Medium	10.93	11	2.458	81.922	0.9045	Medium	10.94	11	2.519	83.982	0.9181	Medium	10.94	11	2.621	87.352	0.9153	Medium	10.94
NVS-PI3-4	6	12	YKQPVVL	8.77	1	4	8.68	8.89	3.692	92.291	0.9147	Medium	8.68	8.89	3.692	92.295	0.9061	Medium	8.68	8.89	3.723	93.076	0.9138	Medium	8.68	8.88	3.731	93.268	0.9251	Medium	8.68	8.89	3.755	93.884	0.9136	Medium	8.68	8.89	3.745	93.631	0.9063	Medium	8.68	8.89	3.729	93.229	0.9224	Medium	8.68
NVS-PI3-4	36	41	ELIPIE	10.59	1	3	10.64	10.74	0.049	1.625	0.9071	Medium	10.64	10.74	0.048	1.602	0.8974	Medium	10.64	10.73	0.042	1.409	0.9055	Medium	10.64	10.73	0.062	2.057	0.9026	Medium	10.64	10.73	0.063	2.106	0.9098	Medium	10.64	10.74	0.068	2.28	0.9138	Medium	10.64	10.74	0.26	8.666	0.9124	Medium	10.64
NVS-PI3-4	36	42	ELIPIEF	13.88	1	4	13.87	13.96	0.071	1.767	0.7958	Medium	13.98	14.06	0.138	3.452	0.7151	Medium	13.94	14.01	0.06	1.491	0.8024	Medium	13.86	13.95	0.117	2.931	0.8231	Medium	13.96	14.03	0.104	2.608	0.761	Medium	13.91	13.99	0.166	4.15	0.7714	Medium	13.87	13.96	0.338	8.452	0.8308	Medium	13.87
NVS-PI3-4	42	58	FVLPTSQRKCKSPETAL	8.48	3	13	8.09	8.77	4.631	35.622	0.928	High	8.09	8.77	4.502	34.633	0.9009	High	8.26	8.38	4.422	34.016	0.9218	High	8.09	8.77	5.802	44.634	0.9338	High	8.09	8.77	5.667	43.589	0.9053	High	8.31	8.4	5.535	42.576	0.9333	High	8.09	8.77	6.638	51.061	0.9279	High	8.09
NVS-PI3-4	42	59	FVLPTSQRKCKSPETALL	9.43	3	14	9.26	9.7	4.205	30.033	0.9217	Medium	9.26	9.7	3.976	28.403	0.9239	High	9.26	9.7	3.761	26.861	0.9239	High	9.25	9.7	5.349	38.206	0.9139	Medium	9.26	9.7	5.07	36.218	0.9232	High	9.26	9.7	4.85	34.646	0.9191	High	9.26	9.7	6.184	44.175	0.9119	Medium	9.26
NVS-PI3-4	59	70	LHVAGHGNVEQM	6.54	2	10	6.78	6.87	1.413	14.135	0.8538	Medium	6.78	6.87	1.42	14.2	0.8493	Medium	6.78	6.86	1.409	14.085	0.8583	Medium	6.78	6.86	1.966	19.66	0.8956	Medium	6.78	6.86	1.85	18.496	0.8722	Medium	6.78	6.86	1.88	18.797	0.87	Medium	6.78	6.87	2.283	22.828	0.9026	Medium	6.78
NVS-PI3-4	59	72	LHVAGHGNVEQMKA	5.97	2	12	5.9	6.06	0.682	5.684	0.8814	Medium	5.9	6.06	0.628	5.231	0.884	Medium	5.9	6.06	0.632	5.264	0.8656	Medium	5.9	6.06	1.333	11.109	0.9091	Medium	5.9	6.06	1.095	9.128	0.9045	Medium	5.9	6.06	1.144	9.532	0.8729	Medium	5.9	6.06	2.011	16.756	0.8895	Medium	5.9
NVS-PI3-4	60	70	HVAGHGNVEQM	5.29	2	9	5.31	5.42	0.653	7.256	0.8984	High	5.31	5.42	0.621	6.899	0.9306	High	5.31	5.42	0.605	6.72	0.9025	High	5.31	5.42	1.26	13.996	0.9311	High	5.31	5.42	1.214	13.494	0.9334	High	5.31	5.42	1.171	13.008	0.9389	High	5.31	5.42	1.855	20.612	0.926	High	5.31
NVS-PI3-4	60	74	HVAGHGNVEQMKAQV	5.94	3	13	5.9	6.24	0.658	5.061	0.7857	Medium	5.9	6.24	0.56	4.307	0.7872	Medium	5.9	6.23	0.673	5.173	0.7977	Medium	5.9	6.23	1.211	9.317	0.7863	Medium	5.9	6.23	0.976	7.506	0.8042	Medium	5.9	6.23	1.1	8.465	0.8067	Medium	5.9	6.24	2.236	17.198	0.7751	Medium	5.9
NVS-PI3-4	60	75	HVAGHGNVEQMKAQVW	8.28	3	14	8.16	8.49	0.428	3.055	0.8029	Medium	8.16	8.49	0.378	2.699	0.8541	Medium	8.16	8.48	0.368	2.63	0.8504	Medium	8.15	8.48	0.839	5.996	0.8244	Medium	8.16	8.48	0.646	4.612	0.8925	Medium	8.16	8.49	0.588	4.203	0.8822	Medium	8.16	8.49	1.368	9.77	0.8121	Medium	8.16
NVS-PI3-4	71	76	KAQVWL	10.59	2	4	10.64	10.71	0.073	1.831	0.9497	Medium	10.64	10.71	0.062	1.556	0.9239	Medium	10.64	10.71	0.049	1.22	0.9247	Medium	10.64	10.71	0.071	1.786	0.9434	Medium	10.64	10.71	0.056	1.404	0.9537	Medium	10.64	10.71	0.042	1.062	0.9613	Medium	10.64	10.71	0.066	1.645	0.9488	Medium	10.64
NVS-PI3-4	77	84	RALETSVA	6.28	2	6	6.07	6.15	2.441	40.691	0.8047	Medium	6.07	6.15	2.595	43.248	0.8188	Medium	6.07	6.15	2.512	41.864	0.8437	Medium	6.06	6.15	3.314	55.238	0.8174	Medium	6.07	6.15	3.326	55.432	0.8411	Medium	6.07	6.15	3.295	54.918	0.8505	Medium	6.07	6.15	3.903	65.043	0.8218	Medium	6.07
NVS-PI3-4	79	84	LETSVA	6.27	1	4	6.24	6.28	2.354	58.852	0.8909	Medium	6.25	6.34	2.427	60.682	0.9179	Medium	6.18	6.28	2.379	59.465	0.9061	Medium	6.18	6.27	3.187	79.676	0.9075	Medium	6.18	6.28	3.177	79.414	0.9223	Medium	6.18	6.28	3.145	78.629	0.9232	Medium	6.19	6.28	3.447	86.168	0.9126	Medium	6.18
NVS-PI3-4	79	86	LETSVAAD	6.15	1	6	5.98	6.38	3.936	65.604	0.824	Medium	5.98	6.38	3.761	62.688	0.8778	Medium	5.98	6.38	3.708	61.792	0.8749	Medium	5.98	6.38	4.464	74.393	0.7879	Medium	5.98	6.38	4.522	75.362	0.9064	Medium	5.98	6.38	4.442	74.041	0.8754	Medium	5.98	6.38	4.947	82.445	0.8199	Medium	5.98
NVS-PI3-4	87	99	FYHRLGPHHFLLL	10.38	2	10	10.4	10.48	0.407	4.074	0.9123	Medium	10.4	10.48	0.391	3.914	0.8941	Medium	10.4	10.48	0.341	3.406	0.9243	Medium	10.4	10.48	0.85	8.497	0.9027	Medium	10.4	10.48	0.663	6.634	0.9069	Medium	10.4	10.48	0.671	6.706	0.9157	Medium	10.4	10.48	1.003	10.028	0.9092	Medium	10.4
NVS-PI3-4	88	98	YHRLGPHHFLL	8.43	4	8	8.58	8.67	0.433	5.408	0.8626	Medium	8.58	8.67	0.415	5.184	0.8994	Medium	8.58	8.67	0.375	4.682	0.9163	Medium	8.57	8.67	0.974	12.172	0.8616	Medium	8.58	8.67	0.823	10.286	0.9136	Medium	8.58	8.67	0.824	10.294	0.9158	Medium	8.58	8.67	1.168	14.603	0.8725	Medium	8.58
NVS-PI3-4	88	99	YHRLGPHHFLLL	9.88	4	9	9.85	10.38	0.43	4.779	0.9204	High	9.85	10.38	0.445	4.939	0.9274	High	9.84	10.38	0.367	4.075	0.9439	High	9.84	10.38	0.872	9.692	0.9351	High	9.84	10.38	0.733	8.146	0.9482	High	9.85	10.38	0.726	8.063	0.9557	High	9.85	10.38	1.085	12.054	0.9288	High	9.84
NVS-PI3-4	100	106	YQKKGQW	5.9	1	5	6	6.09	1.645	32.907	0.919	Medium	6	6.09	1.657	33.136	0.9252	High	6	6.09	1.656	33.129	0.9102	Medium	6	6.09	2.698	53.957	0.916	High	6	6.09	2.703	54.061	0.9181	High	6	6.09	2.721	54.417	0.8985	Medium	6	6.09	3.089	61.789	0.9248	High	6
NVS-PI3-4	107	113	YEIYDKY	9.1	1	5	8.99	9.18	1.369	27.376	0.8187	Medium	8.99	9.18	1.397	27.941	0.8973	Medium	8.99	9.18	1.302	26.046	0.8711	Medium	8.99	9.18	2.192	43.838	0.8016	Medium	8.99	9.18	2.132	42.64	0.8879	Medium	8.99	9.18	2.139	42.785	0.8542	Medium	8.99	9.18	2.84	56.793	0.8302	Medium	8.99
NVS-PI3-4	107	118	YEIYDKYQVVQT	9.45	2	10	9.41	9.48	1.341	13.41	0.8515	Medium	9.41	9.48	1.29	12.904	0.9175	High	9.41	9.47	1.226	12.265	0.9103	High	9.41	9.47	2.328	23.276	0.8755	Medium	9.41	9.47	2.132	21.318	0.9298	High	9.41	9.48	2.115	21.15	0.9224	High	9.41	9.48	3.54	35.4	0.8824	Medium	9.41
NVS-PI3-4	107	121	YEIYDKYQVVQTLDC	11.03	2	13	11.13	11.22	2.431	18.697	0.8987	Medium	11.13	11.22	2.394	18.417	0.9365	Medium	11.13	11.22	2.369	18.222	0.9255	Medium	11.2	11.28	3.582	27.552	0.8852	Medium	11.13	11.22	3.381	26.007	0.9415	Medium	11.13	11.22	3.211	24.701	0.9355	Medium	11.13	11.22	4.664	35.878	0.9011	Medium	11.13
NVS-PI3-4	114	119	QVVQTL	8.16	1	4	8.18	8.27	0.044	1.096	0.8371	Medium	8.18	8.27	0.066	1.64	0.8689	Medium	8.17	8.27	0.039	0.982	0.8436	Medium	8.17	8.26	0.09	2.249	0.8439	Medium	8.17	8.27	0.053	1.33	0.8957	Medium	8.17	8.27	0.069	1.726	0.8615	Medium	8.18	8.27	0.181	4.525	0.8456	Medium	8.17
NVS-PI3-4	122	137	LRYWKATHRSPGQIHL	7.45	4	13	7.44	7.95	0.839	6.454	0.8903	Medium	7.44	7.95	0.564	4.338	0.9113	Medium	7.44	7.95	0.505	3.884	0.9073	Medium	7.44	7.95	1.748	13.444	0.9003	Medium	7.44	7.95	1.288	9.905	0.904	Medium	7.44	7.95	1.249	9.611	0.911	Medium	7.44	7.95	3.067	23.59	0.8917	Medium	7.44
NVS-PI3-4	125	137	WKATHRSPGQIHL	6.9	3	10	6.82	6.88	0.798	7.982	0.8085	Medium	6.82	6.88	0.716	7.163	0.8581	Medium	6.81	6.88	0.978	9.784	0.8389	Medium	6.81	6.88	1.672	16.717	0.8833	Medium	6.81	6.88	1.403	14.033	0.8722	Medium	6.81	6.88	1.621	16.207	0.8759	Medium	6.82	6.88	2.147	21.469	0.8755	Medium	6.81
NVS-PI3-4	138	149	VQRHPPSEESQA	4.07	2	8	3.94	4.38	3.445	43.064	0.916	Medium	3.94	4.38	3.334	41.672	0.9296	High	3.94	4.38	3.293	41.159	0.932	High	3.94	4.38	4.138	51.724	0.9277	Medium	3.94	4.38	4.14	51.748	0.9494	High	3.94	4.38	4.159	51.982	0.9237	Medium	3.94	4.38	5.195	64.934	0.9309	Medium	3.94
NVS-PI3-4	138	150	VQRHPPSEESQAF	6.68	2	9	6.54	6.95	2.824	31.382	0.8588	Medium	6.54	6.95	2.894	32.161	0.8826	Medium	6.54	6.95	2.928	32.528	0.8668	Medium	6.54	6.95	4.053	45.031	0.8585	Medium	6.54	6.95	4.126	45.847	0.9015	Medium	6.54	6.95	4.07	45.227	0.8645	Medium	6.54	6.95	5.493	61.037	0.8521	Medium	6.54
NVS-PI3-4	138	157	VQRHPPSEESQAFQRQLTAL	9.74	4	16	9.55	9.95	2.002	12.514	0.8246	Medium	9.55	9.95	1.883	11.768	0.8582	Medium	9.55	9.94	1.822	11.387	0.8517	Medium	9.55	9.94	3.551	22.194	0.8008	Medium	9.55	9.94	3.286	20.54	0.8605	Medium	9.55	9.95	3.19	19.937	0.8337	Medium	9.55	9.95	5.711	35.691	0.8042	Medium	9.55
NVS-PI3-4	150	157	FQRQLTAL	9.07	2	6	9.05	9.14	0.166	2.76	0.915	Medium	9.05	9.14	0.185	3.086	0.9038	Medium	9.05	9.14	0.168	2.796	0.9102	Medium	9.04	9.14	0.351	5.858	0.9229	Medium	9.05	9.14	0.352	5.865	0.9128	Medium	9.05	9.14	0.352	5.859	0.9213	Medium	9.05	9.14	1.096	18.267	0.9032	Medium	9.05
[truncated: 334 more rows]
[truncated: 29 more columns]
