# Supplementary material for: Disease-related mutations in PI3Kγ disrupt regulatory C-terminal dynamics and reveal a path to selective inhibitors
Source: eLife. 2021 Mar 4;10:e64691. doi: 10.7554/eLife.64691 (PMC7955810; doi:10.7554/eLife.64691)
Supplement: Figure 6—source data 1. [file elife-64691-fig6-data1.xlsx]

## Sheet: Figure 6_IC50_curves
Gedatolisib IC50 curve data (fraction maximal activity)								IC50 in nM (95% CI)
log [Inhibitor] (in nM)	WT			R1021C				WT	R1021C
3	0.253386	0.054574	0.10414	0.114727	0.030337	0.072585		262 to 407	100 to 141
2.523	0.503409	0.53499	0.468098	0.225075	0.153717	0.148357
2.046	0.861555	0.817253	0.804204	0.550655	0.620752	0.511665
1.569	0.936343	0.884584	0.937878	0.828838	0.830309	0.737091
1.092	0.97264	1.01508	0.893356	0.904085	0.945281	0.952428
0.615	0.987883	1.02396	1.0835	0.952323	1.06898	0.980593
0.137	1.02561	1.06234	1.00883	1.00434	1.01076	1.0736
IPI-549 IC50 curve data (fraction maximal activity)								IC50 in nM (95% CI)
log [Inhibitor] (in nM)	WT			R1021C				WT	R1021C
3	-0.0387462	-0.0238326	0.072887	-0.020844	0.010264	0.036117		90 to 148	73 to 108
2.523	0.170483	0.257991	0.23255	0.148462	0.139529	0.111259
2.046	0.491456	0.590368	0.512401	0.430008	0.435157	0.413508
1.569	0.781395	0.883706	0.842475	0.846073	0.703356	0.813494
1.092	0.860349	0.931737	0.950928	0.925419	0.90482	0.963252
0.615	0.78929	0.897085	0.821968	0.944546	0.895572	1.02095
0.137	0.975601	0.921429	1.0062	1.0385	0.916381	0.956421
