# Supplementary material for: Disease-related mutations in PI3Kγ disrupt regulatory C-terminal dynamics and reveal a path to selective inhibitors
Source: eLife journal article supplement (doi:10.7554/elife.64691), 2021-03-04

**A** IPI-549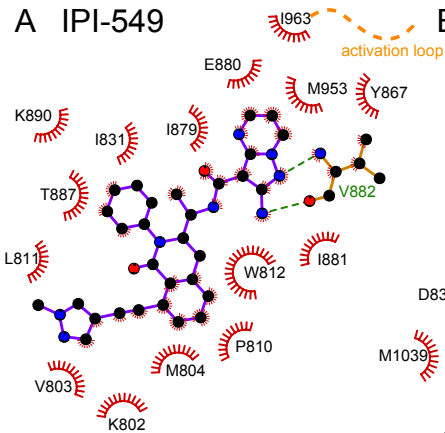**B** Gedatolisib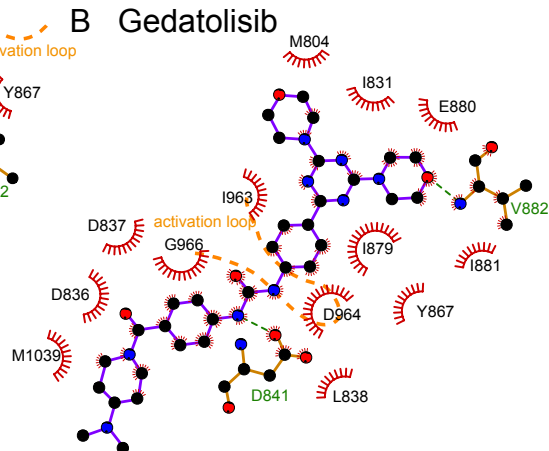**C** NVS-PI3-4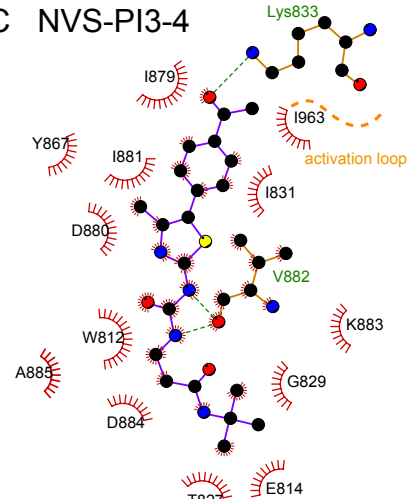**D** IPI-549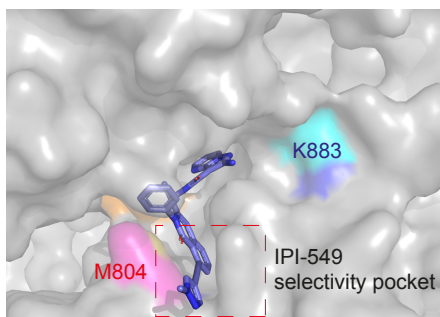**E** Gedatolisib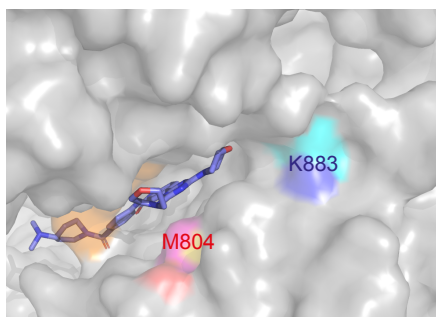**F** NVS-PI3-4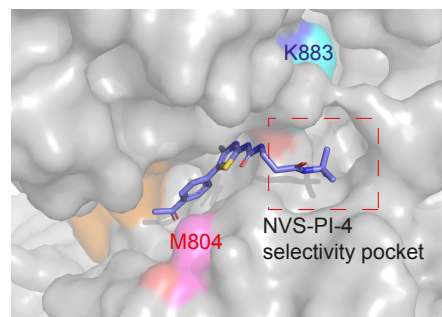**G** PI3K $\gamma$  NVS- PI3-4 xtal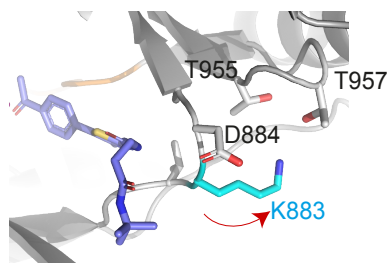**I** PI3K $\delta$  NVS- PI3-4 model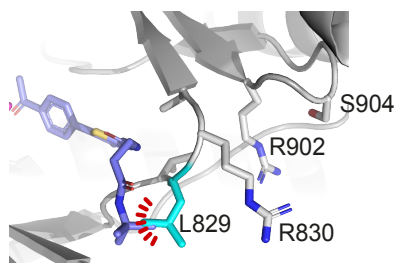**K** PI3K $\gamma$  IPI-549 xtal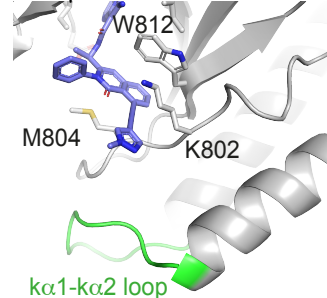**H** PI3K $\gamma$  Gedatolisib xtal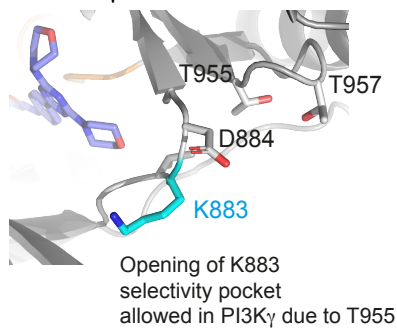**J** PI3K $\alpha$  NVS- PI3-4 model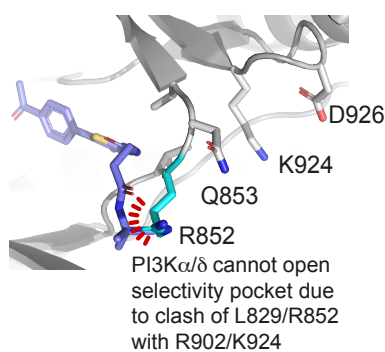**L** PI3K $\delta$  IPI-549 model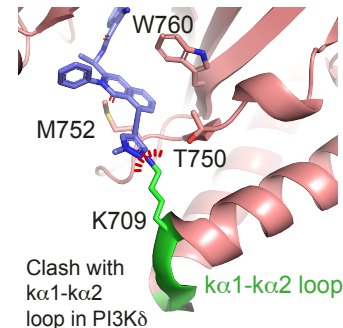

Supplement: supp [file elife-64691-supp-v1.zip]
