# Supplementary material for: Disease-related mutations in PI3Kγ disrupt regulatory C-terminal dynamics and reveal a path to selective inhibitors
Source: eLife journal article supplement (doi:10.7554/elife.64691), 2021-03-04

A

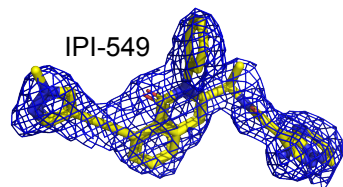

NVS-PI3-4

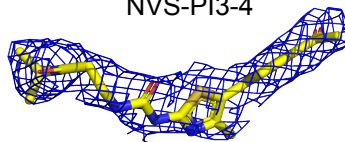

Gedatolisib

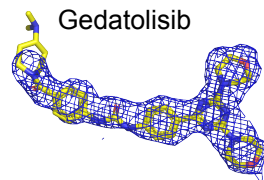

B

PI3K $\gamma$  IPI-549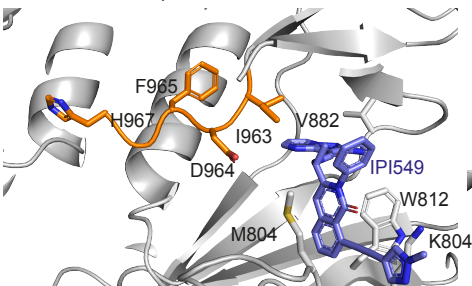

C

PI3K $\gamma$  PIK90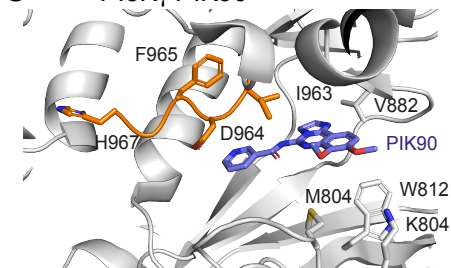

D

PI3K $\gamma$  NVS-PI3-4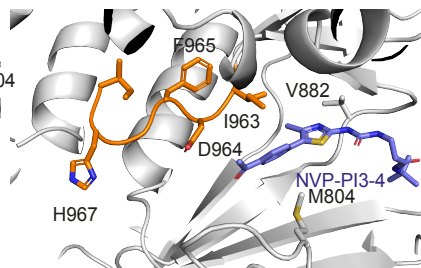

E

PI3K $\gamma$  Gedatolisib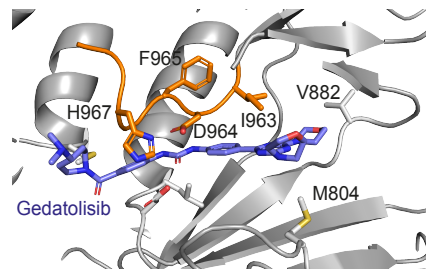

F

PI3K $\gamma$  Omipalisib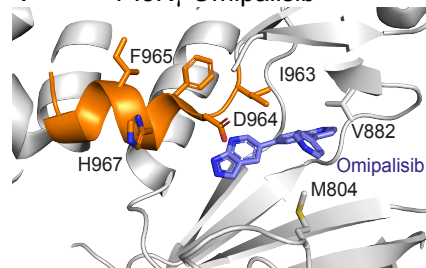

Supplement: supp [file elife-64691-supp-v1.zip]
