# Supplementary figures and images for: Disease-related mutations in PI3Kγ disrupt regulatory C-terminal dynamics and reveal a path to selective inhibitors
Source: eLife journal article supplement (doi:10.7554/elife.64691), 2021-03-04

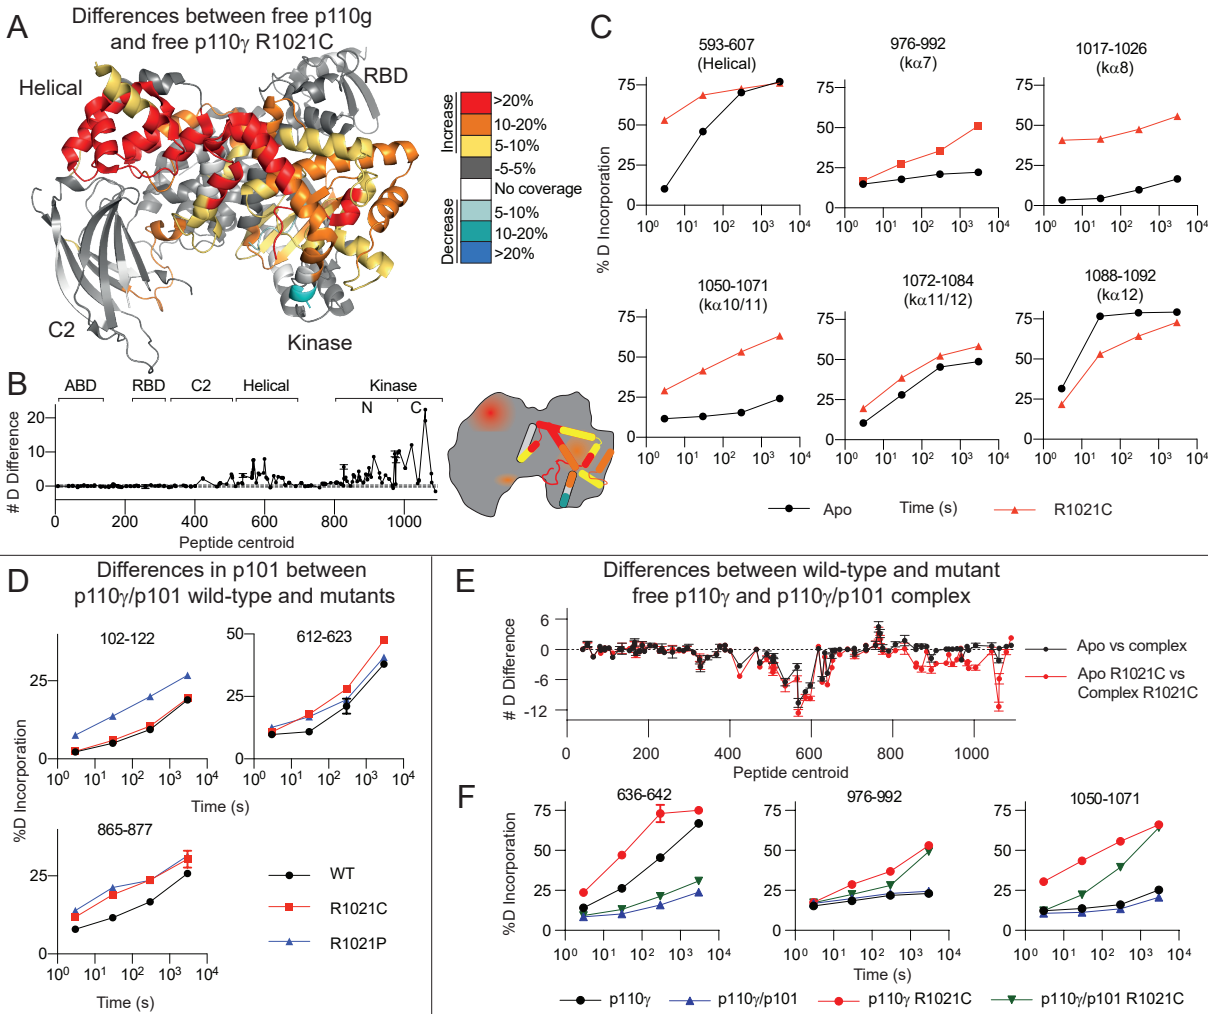

Supplement: supp [file elife-64691-supp-v1.zip]

A

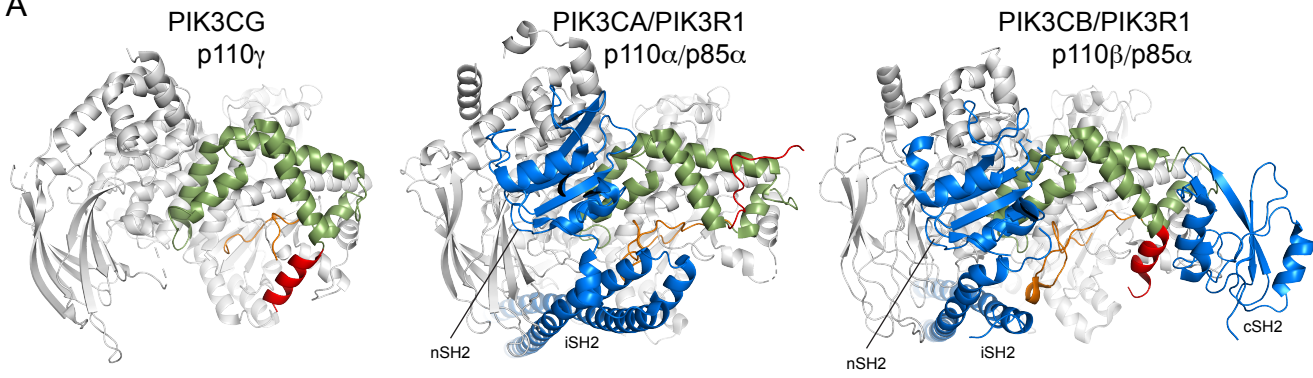

B

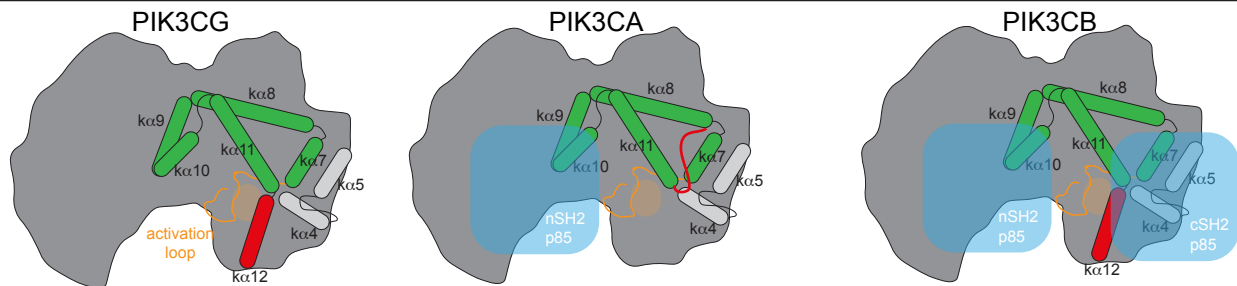

C

Proposed mechanism for the role of the c-terminus in membrane recruitment

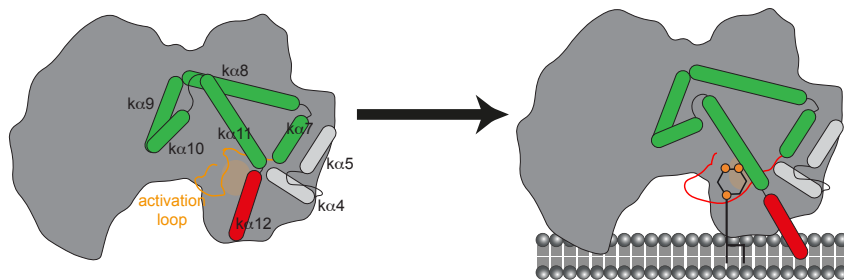

Supplement: supp [file elife-64691-supp-v1.zip]

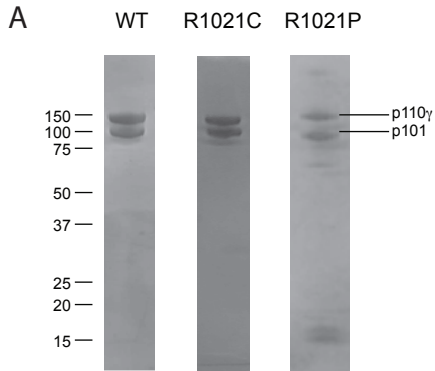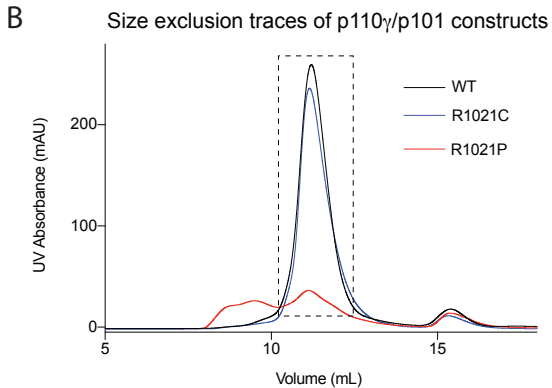

Supplement: supp [file elife-64691-supp-v1.zip]

A

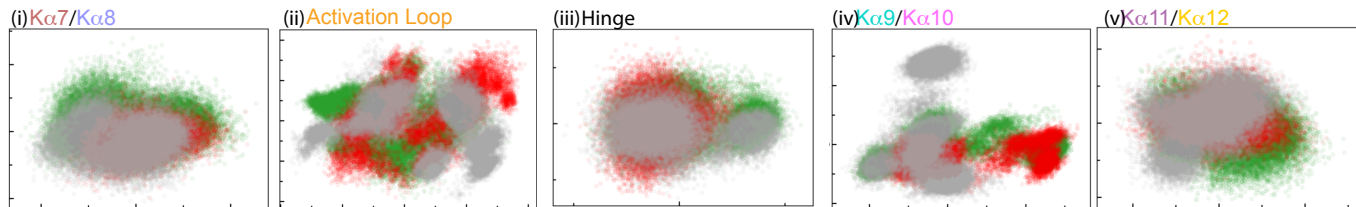

B

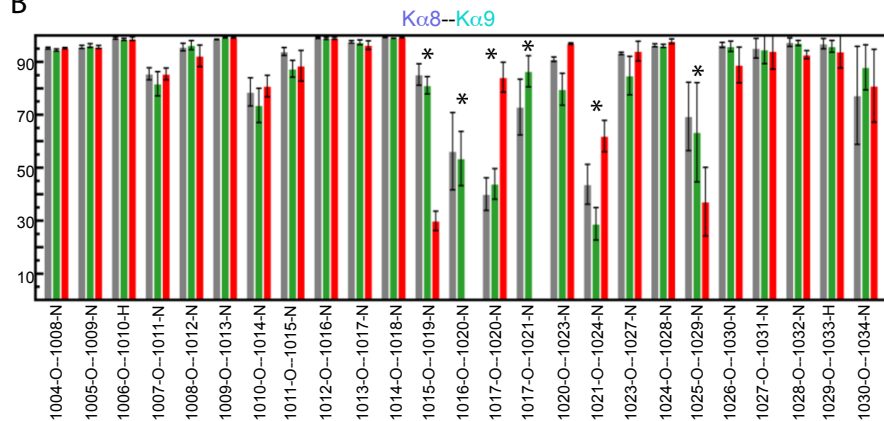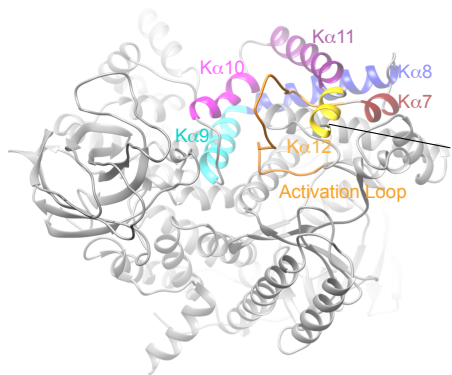

C

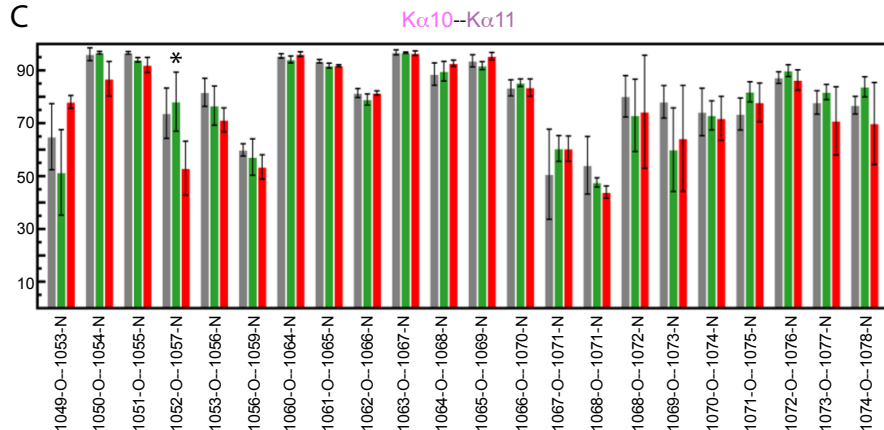

Supplement: supp [file elife-64691-supp-v1.zip]

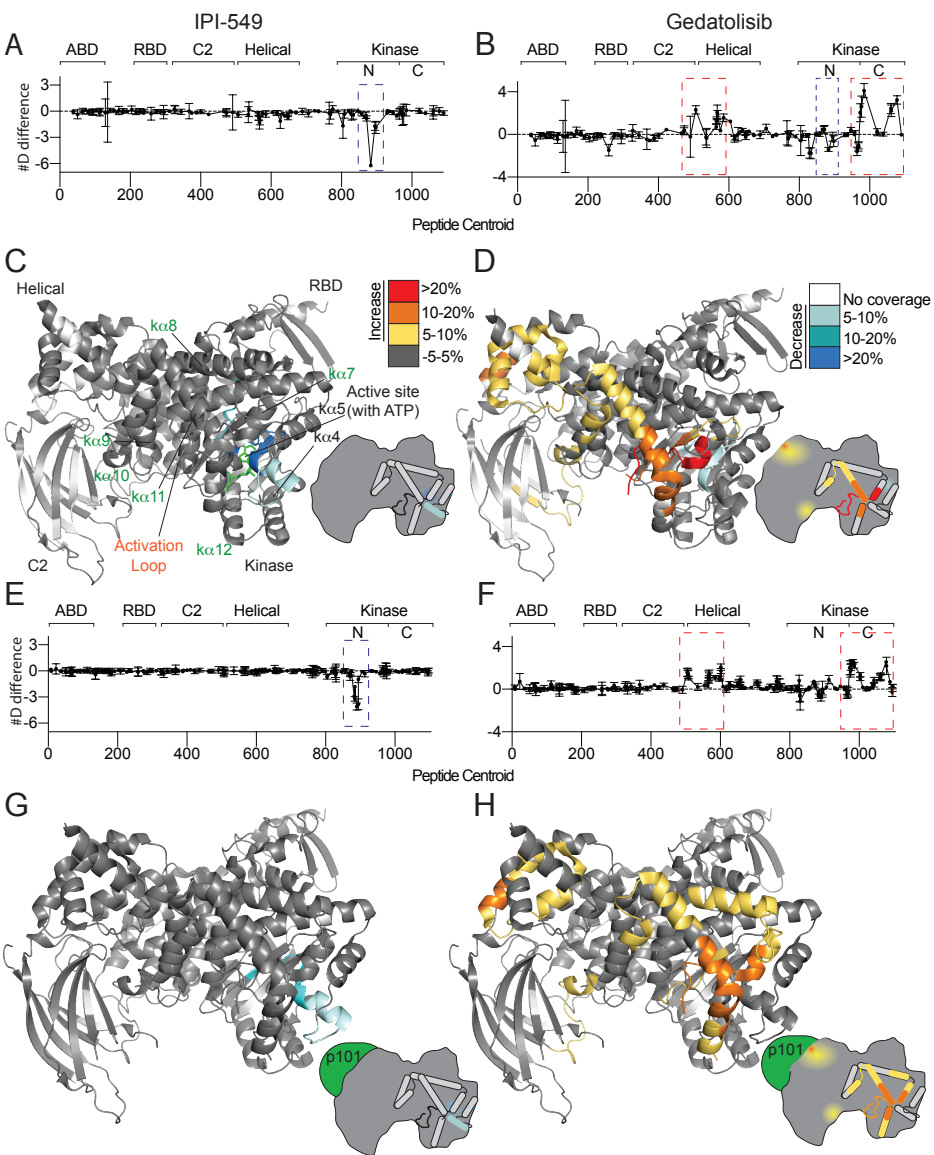

Supplement: supp [file elife-64691-supp-v1.zip]

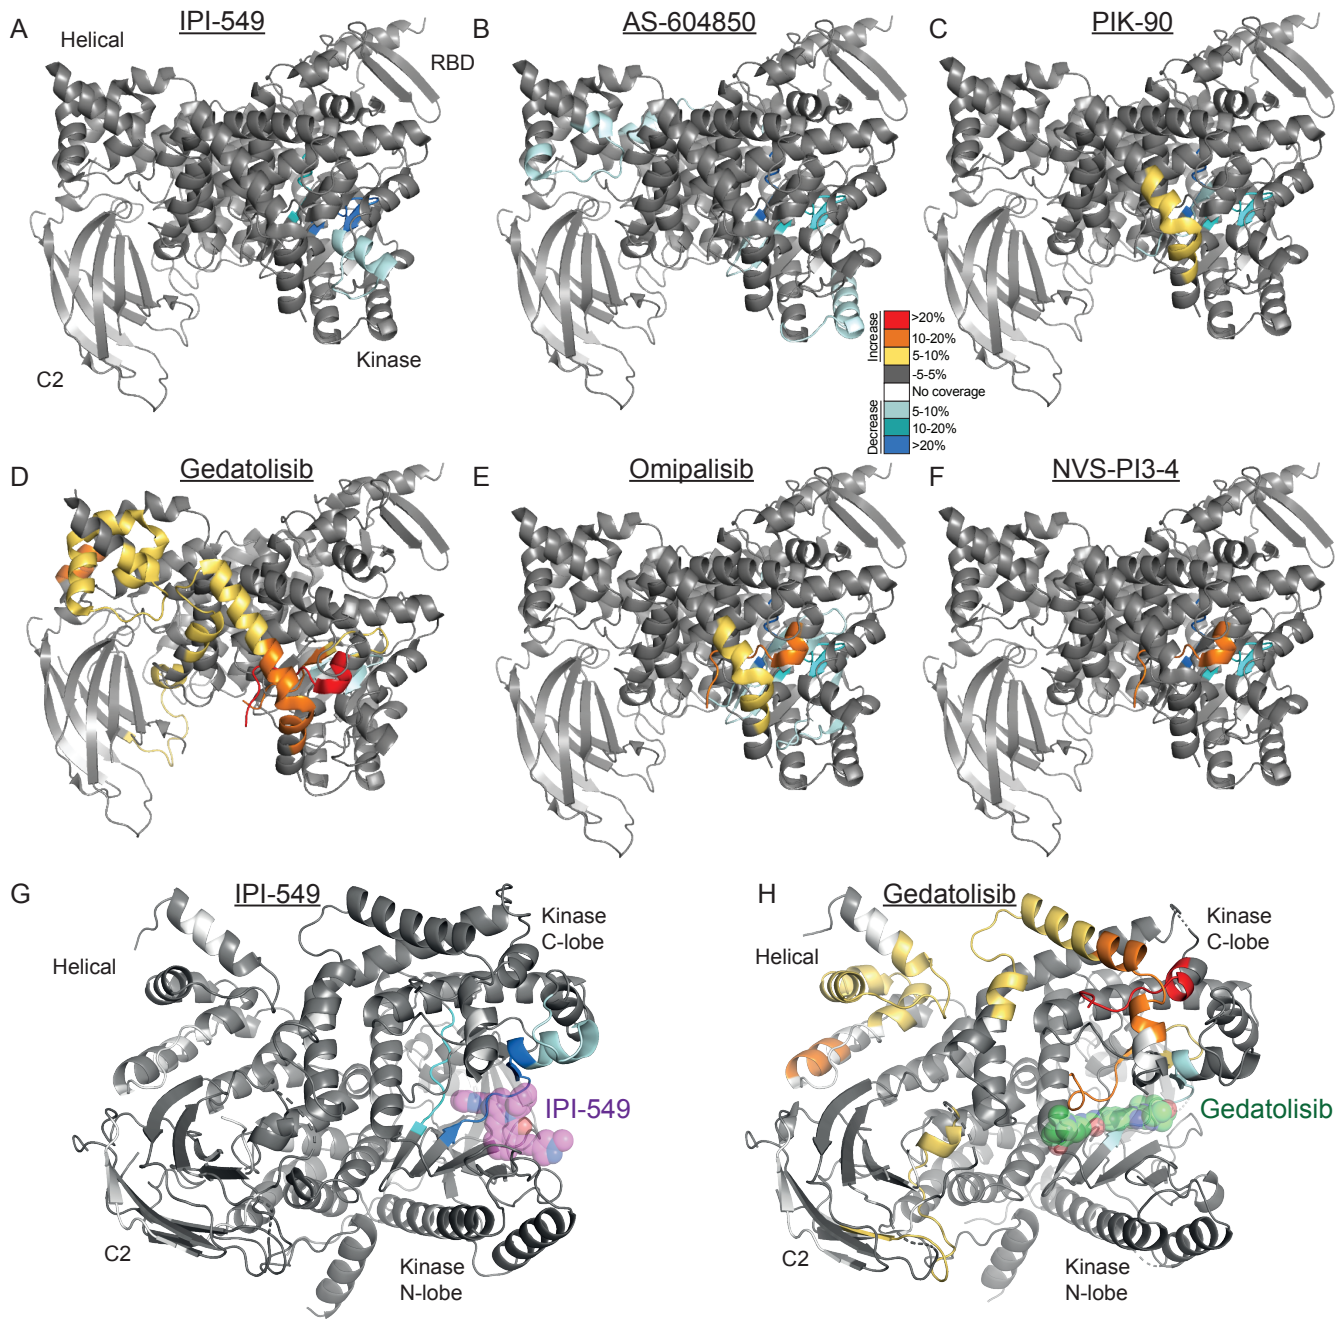

Supplement: supp [file elife-64691-supp-v1.zip]
